# Supplementary material for: Understanding trends in Zostera research, stressors, and response variables: a global systematic review of the seagrass genus
Source: PeerJ journal article supplement (doi:10.7717/peerj.19209), 2025-04-17

# Full Text Screening Decision Tree

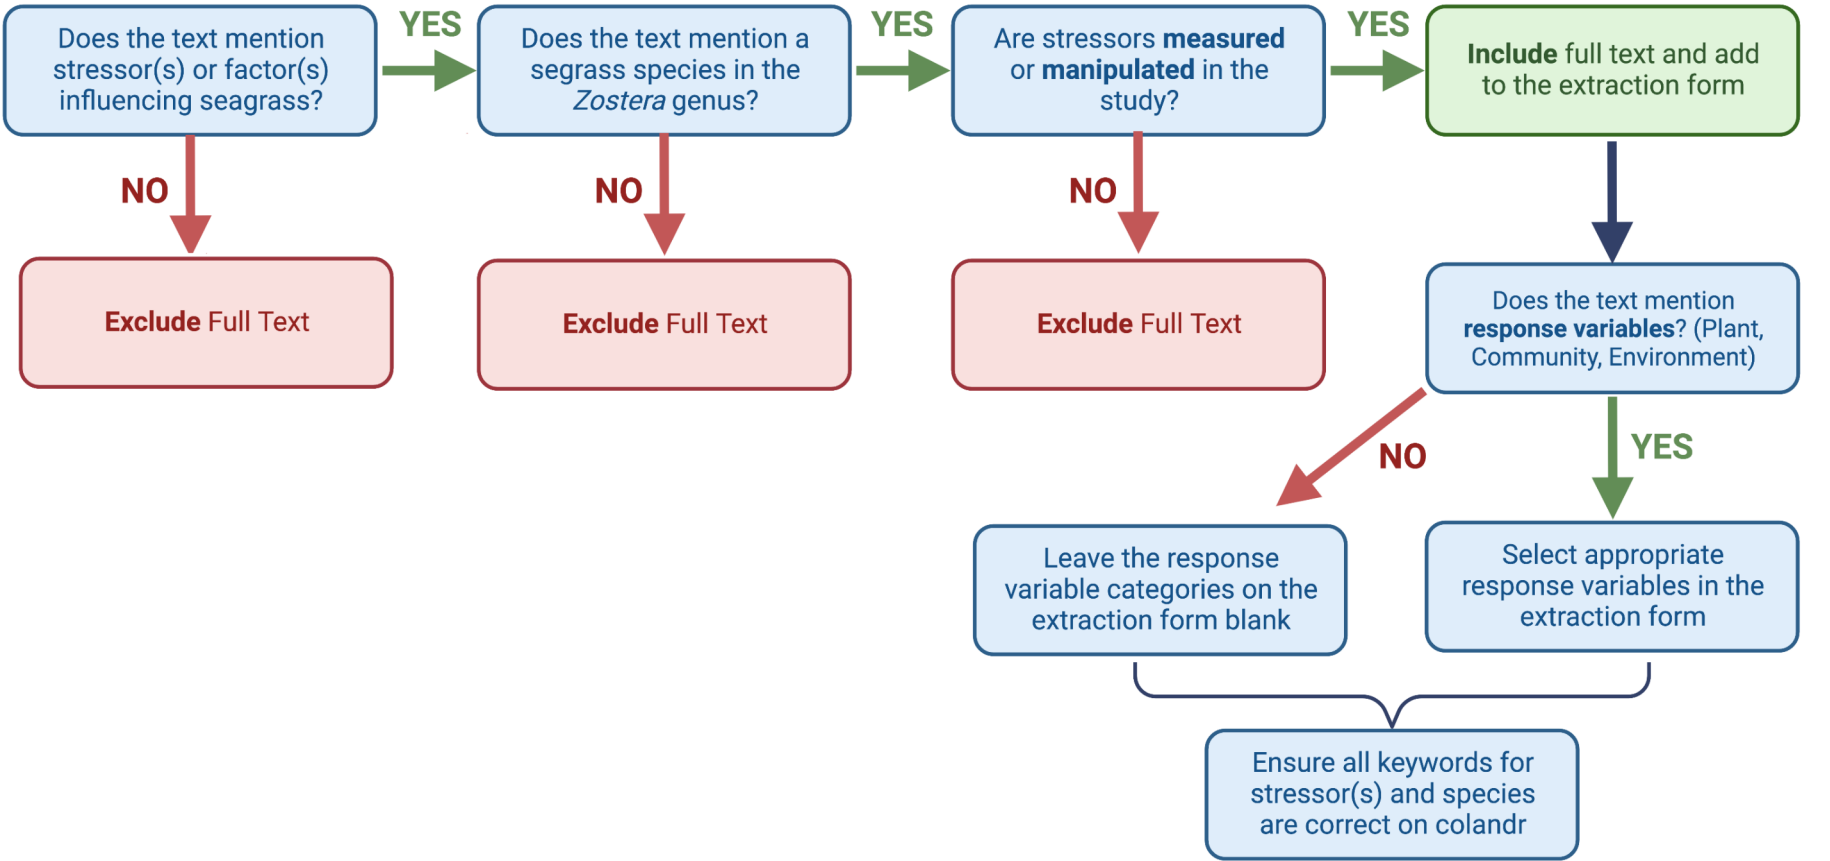

Supplement: FigS2.pdf [file FigS2.pdf]
