# Supplementary material for: Understanding trends in Zostera research, stressors, and response variables: a global systematic review of the seagrass genus
Source: PeerJ. 2025 Apr 17;13:e19209. doi: 10.7717/peerj.19209 (PMC12009562; doi:10.7717/peerj.19209)
Supplement: Supplemental Information 6 [file peerj-13-19209-s006.xlsx]

## Sheet: Extraction Form
Supplemental Data Form S4.1, All Included Articles (Full-Text Extraction Form)
Title	Authors	PubYear	Date Assessed	Person Extracting Data	Study Design	Study Type	Other Study	Management/Restoration	Zostera Species	Zostera Species 2	Location-Name	Location-GPS	Latitude	Longitude	Stressor 1	Stressor 2	Stressor 3	Stressor 4	Plant, Community, or Environmental Response Variables?	Plant Response Variable 1	Plant Response Variable 2	Plant Response Variable 3	Plant Response Variable 4	Community Response Variable 1	Community Response Variable 2	Community Response Variable 3	Community Response Variable 4	Environment Response Variable 1	Environment Response Variable 2	Environment Response Variable 3	Environment Response Variable 4	Additional Stressor	Additional Response Variable	Location 2-Name	Location 2- GPS	lat 2	lon 2	Location 3-Name	Location 3-GPS	lat 3	lon 3	Location 4-Name	Location 4-GPS	lat 4	lon 4	Location 5-Name	Location 5-GPS	lat 5	lon 5
3D model system for hydrodynamics, eutrophication and nutrient transport	Rasmussen et al.	2000	2022-10-24	Sarah Joy Bittick			Model		marina		Danish fjord, (Odense Fjord, Funen).	(55 28 N, 10 28 E).	55.4667	10.4667	Hydrodynamics	Nutrients			Plant, Community, & Environment	Growth				Macroalgae	Chlorophyll A	Invertebrates	Seagrass competition	Water Column Dissolved Oxygen	Water Column Nutrients	Sediment Characteristics	Sediment Nutrients
A biophysical representation of seagrass growth for application in a complex shallow-water biogeochemical model	Baird et al.	2016	2022-10-26	Sarah Joy Bittick			Model		mulleri		Gladstone Harbour, on the northeast coast of Australia		-23.8677	151.357	Light	Nutrients	Sediment	Temperature	Plant, Community, & Environment	Physiological Measures	Growth	Shoot Survival		Seagrass competition	Distribution			Sediment Characteristics	Water Column Dissolved Oxygen	Sediment Nutrients	Water Column Nutrients
A buffer sensitive inorganic carbon utilisation system in Zostera marina	Hellblom et al.	2001	2022-11-02	Sarah Joy Bittick	Mesocosm	Manipulative			marina		Kristineberg Marine Research Station, Fiskebäckskil, at the Swedish West Coast		58.2499	11.4445	Acidification	Carbon			Plant	Photosynthetic Output
A comparison between fluid shear stress reduction by halophytic plants in Venice Lagoon, Italy and Rustico Bay, Canada - analyses of in situ measurements	Thompson et al.	2004	2022-10-08	Sarah Joy Bittick	Field	Survey			noltii		Venice Lagoon		45.2547	12.2519	Hydrodynamics	Sediment			Environment									Sediment Characteristics						PEI	46.431224, -63.242946	46.4312	-63.2429
A comparison of growth patterns between non-indigenous Halophila nipponica and the native sympatric Zostera marina on the southern coast of the Korean peninsula	Park, Kim, & Lee	2017	2022-12-27	Hannah Lyford	Field	Survey			marina		Ando Island, South Korea	34.481654 N, 127.808864 E	34.4817	127.809	Light	Nutrients	Temperature	Invasion	Plant, Community, & Environment	Shoot Density	Growth	Physiological Measures		Distribution	Organismal Diversity			Water Column Nutrients	Water Column Temperature	Water Column Turbidity
A dynamic model describing the seasonal variations in growth and the distribution of eelgrass (Zostera marina L.) I. Model theory	Bach 1992	1992	2022-03-29	Devin Ferguson	Field	Survey			marina		Masnedø, Sealand, Denmark		54.9803	11.8974	Light	Temperature	Nutrients		Plant & Community	Shoot Density	Growth	Physiological Measures		Chlorophyll A
A dynamical model for characterising seasonality effects on eelgrass plastochron intervals	E. SOlana-Arellano et al.	2010	2022-11-10	Mehana Muranaka	Mesocosm	Manipulative			marina		punta banda estuary a shallow coastal lagood near ensenada baja california		31.7167	-116.617	Light	Temperature	Nutrients		Plant	Shoot Survival	Growth
A healthy trophic structure underlies the resistance of pristine seagrass beds to nutrient enrichment	Yan et al., 2020	2020	2022-02-21	Hannah Lyford	Mesocosm	Manipulative			japonica		Yellow River Delta National Nature Reserve, Northeast China	37.58 N, 118.55 E	37.5833	118.55	Nutrients	Herbivory			Plant, Community, & Environment	Shoot Density	Physiological Measures			Organismal Diversity	Epiphytes			Water Column Nutrients	Water Column Turbidity
A linked physical and biological framework to assess biogeochemical dynamics in a shallow estuarine ecosystem	Buzzelli et al.	1999	2022-10-06	Sarah Joy Bittick			Model		marina		Chesakpeake Bay	371246N, 762346W	37.2128	-76.3961	Hydrodynamics	Light	Temperature		Plant, Community, & Environment	Physiological Measures	Growth			Epiphytes				Sediment Characteristics	Water Column Nutrients
A modelled global distribution of the seagrass biome	Jayathilake and Costello	2018	2023-01-16	Sarah Joy Bittick			Model				everywhere				Temperature	Hydrodynamics			Community & Environment					Distribution				Water Column Temperature	Water Column Salinity	Water Column pH	Sediment Nutrients
A new mechanistic understanding of light-limitation in the seagrass Zostera muelleri	Davey et al.	2018	2022-10-03	Sarah Joy Bittick	Mesocosm	Manipulative			mulleri		Narrabeen Lakes, Australia		-33.7165	151.285	Light				Plant	Photosynthetic Output	Physiological Measures
A non-native amphipod consumes eelgrass inflorescences in San Francisco Bay	Reynolds et al.	2012	2022-09-27	Sarah Joy Bittick	Field	Survey			marina		Point San Pablo, San Fransisco Bay, CA	37° 58’ 28” N, 122° 24’ 50” W	37.9744	-122.414	Invasion	Herbivory	Invertebrates		Plant & Community	Shoot Density	Reproductive Output	Physiological Measures		Invertebrates	Macroalgae									Crown Beach	37° 45’ 48” N, 122° 16’ 20” W	37.7633	-122.272
A novel 2D model of internal O2 dynamics and H2S intrusion in seagrasses	Miller, Miele, & Burd	2007	2022-12-07	Hannah Lyford			Model		marina		Marine Sciences Department, University of Georgia, Athens, GA, USA	33.9454° N, 83.3764° W	33.9454	-83.3764	Sediment	Oxygen	Light	Toxins	Plant & Environment	Physiological Measures	Photosynthetic Output							Sediment Characteristics	Sediment Nutrients	Water Column Dissolved Oxygen
A novel method combining species distribution models, remote sensing, and field surveys for detecting and mapping subtidal seagrass meadows	Beca-Carretero et al.	2020	2023-02-06	Sarah Joy Bittick	Field	Survey	Model		marina		Kilkieran Bay, Bertraghboy Bay, and Chasla Bay (53.394 N, −9.869 W; 53.222 N, −9.536 W)		53.394	-9.869	Temperature	Light	Sediment	Hydrodynamics	Community & Environment					Distribution	Macroalgae			Water Column Temperature	Sediment Characteristics
A preliminary assessment of crab predation on epifaunal fouling organisms attatched to eelgrass at martha's Vineyard, Massachusetts, USA	Mary R. Carman and David W. Grunden	2019	2022-11-02	Mehana Muranaka	Mesocosm	Manipulative			marina		marthas vineyard, sengekontacket pond		41.4104	-70.5504	Invertebrates	Herbivory			Plant	Shoot Survival
A simulation model for the annual fluctuation of Zostera marina biomass in the Venice lagoon	Zharova et al. 2001	2001	2022-02-23	Devin Ferguson	Field	Survey			marina		area of the southern basin of the Venice lagoon		42	12	Light	Temperature	Nutrients		Plant	Growth	Shoot Density	Physiological Measures	Photosynthetic Output
A SIMULATION-MODEL OF PRODUCTION, SEASONAL-CHANGES IN BIOMASS AND DISTRIBUTION OF EELGRASS (ZOSTERA-MARINA) IN LAKE GREVELINGEN	Verhagen & Nienhuis, 1983	1983	2021-10-21	Hannah Lyford	Field	Survey			marina		Lake Grevelingen, Holland	51.7603° N, 3.9073° E	51.7603	3.9073	Temperature	Light			Plant & Community	Growth				Distribution
A tale of two algal blooms: Negative and predictable effects of two common bloom-forming macroalgae on seagrass and epiphytes	Sarah Joy Bittick, M. Sutula, P. Fong	2018	2022-11-06	Mehana Muranaka	Field	Manipulative			marina		Bodega harbor, California		38.323	-123.044	Nutrients	Light			Plant & Community	Shoot Density	Growth			Epiphytes								Macroalgae
A Three-Stage Symbiosis Forms the Foundation of Seagrass Ecosystems	van der Heide et al	2012	2022-12-22	Hannah Lyford	Mesocosm	Manipulative			noltii		Banc d’Arguin, Mauritania	20.529814, -16.403343	20.5298	-16.4033	Invertebrates	Toxins	Sediment		Plant, Community, & Environment	Physiological Measures	Shoot Density	Growth		Invertebrates	Microbial Diversity			Water Column Dissolved Oxygen	Sediment Nutrients	Sediment Characteristics
A unique meadow of the marine angiosperm Zostera japonica, covering a large area in the turbid intertidal Yellow River Delta, China	Zhang et al.	2019	2022-12-01	Sarah Joy Bittick	Field	Survey			japonica		Yellow seas	37°48′9″N, 119°9′49″E, DY-2 was located at 37°51′7″N, 119°5′47″E, and DY-3 was located at 37°43′45″, 119°14′29″E. Three parallel transect lines for sampling were m	37.8519	119.241	Temperature	Light	Nutrients		Plant & Environment	Growth	Reproductive Output	Physiological Measures	Shoot Density					Water Column Nutrients	Sediment Characteristics	Water Column Temperature	Water Column Dissolved Oxygen
Abundance of Seagrass (Zostera marina L.) and Macroalgae in Relation to the Salinity-Temperature Gradient in Yaquina Bay, Oregon, USA	Kentula & DeWitt 2003	2003	2021-06-14	Devin Ferguson	Field	Survey			marina		Yaquina Bay, Oregon, USA	44°36'N 124°01'W	44.6	-124.017	Salinity	Temperature			Plant, Community, & Environment	Growth	Shoot Density			Macroalgae	Distribution			Water Column Temperature	Water Column Salinity	Water Column Turbidity	Water Column Nutrients
Acclimation of seagrass Zostera noltii to co-occurring hydrodynamic and light stresses	CB de los Santos et al. 2010	2010	2022-10-20	Carolina Salcedo	Mesocosm	Manipulative			noltii		Intertidal Bed at the Los Torunos salt marsh in El Cadiz Natural Park, Cadiz, Southern Spain	36° 30' N 6° 10' 0.0012" W	36.5	-6.16667	Light	Hydrodynamics			Plant	Growth	Shoot Density
Accumulation of Trace Metal Elements (Cu, Zn, Cd, and Pb) in Surface Sediment via Decomposed Seagrass Leaves: A Mesocosm Experiment Using Zostera marina L.	Hosokawa, Konuma, Nakamura	2016	2022-12-19	Hannah Lyford	Mesocosm	Manipulative			marina		Kurihama Bay, Tokyo, Japan	35°13ʹN, 139°43ʹE	35.2167	139.717	Sediment	Toxins			Plant, Community, & Environment	Physiological Measures	Shoot Density			Epiphytes				Sediment Nutrients	Sediment Characteristics	Water Column Temperature
Acute and prolonged effects of variable salinity on growth, gas exchange and photobiology of eelgrass (Zostera marina L.)	Sola et al. 2020	2020	2021-05-20	Devin Ferguson	Mesocosm	Manipulative			marina		shallow meadow in Aarhus Bay, Denmark	56°22’N 10°29’W	56.3667	10.4833	Salinity				Plant	Growth	Physiological Measures
Adaptations by Zostera marina Dominated Seagrass Meadows in Response to Water Quality and Climate Forcing		2018	2022-10-08	Carolina Salcedo	Field	Survey			marina		Goodwins Islands in the polyhaline portion of the York River Estuary	31° 37' 1" N 76° 29' 19" W	31.6169	-76.4886	Temperature	Aquaculture Impacts	Nutrients		Plant	Reproductive Output	Growth
Adaptive strategies of Zostera japonica photosynthetic electron transport in response to thermal stress	Di Zhang et al. 2017	2017	2022-06-17	Sadie Kenny	Mesocosm	Manipulative			japonica		Intertidal zones of Changdao, Yantai, Shandong Province, China	37°54′36ʺN, 120°43′48ʺE	37.91	120.73	Temperature				Plant	Photosynthetic Output
Additive response to multiple environmental stressors in the seagrass Zostera marina L.	Francisco Moreno-Marin et al. 2018	2018	2021-06-07	Sadie Kenny	Mesocosm	Manipulative			marina		Roskilde Fjord, Denmark (1 m depth)	55° 42' N, 11° 47' E	55.7	11.7833	Temperature	Light	Nutrients		Plant & Environment	Growth	Physiological Meaures							Water Column Dissolved Oxygen
Agent based modelling (ABM) of eelgrass (Zostera marina) seedbank dynamics in a shallow Danish estuary	K. Kuusemäe et al. 2018	2018	2022-11-27	Emma Guerrini Romano	Mesocosm	Manipulative	Model		marina		Odense Fjord, Denmark		55.4872	10.5287	Nutrients				Plant	Shoot Density	Reproductive Output	Shoot Survival
Algal mats reduce eelgrass (Zostera marina L.) growth in mixed and monospecific meadows	Gustafsson & Bostrom, 2014	2014	2022-07-17	Hannah Lyford	Field	Manipulative			marina		Angso Island, Archipelago Sea, Northern Baltic Sea, Sweden	67.25675° N, 20.1° E	59.6175	18.7599	Nutrients	Light			Plant, Community, & Environment	Shoot Density	Shoot Survival	Growth		Macroalgae				Water Column Nutrients	Water Column Dissolved Oxygen	Water Column Turbidity
Algicidal and growth-inhibiting bacteria associated with seagrass and macroalgae beds inPuget Sound, WA, USA	Nobuharu Inaba et al. 2016	2016	2022-10-14	Sadie Kenny	Field	Survey			marina		Puget Sound, WA, USA		47.7996	-122.563	Pathogens	Microbiome			Community					Microbial Diversity
Alteration of microbial community composition and changes in decomposition associated with an invasive intertidal macrophyte	Hahn	2003	2022-09-26	Sarah Joy Bittick	Field	Manipulative			marina	japonica	Padilla Bay, WA	48°28; N, longitude 122°3T W	48.4667	-122.517	Invasion				Plant & Community	Physiological Measures				Microbial Diversity
Alteration of seagrass species composition and function over two decades	Bishop et al., 2008	2008	2022-11-14	Hannah Lyford	Field	Survey			marina		Dog Island, Bogue Sound, North Carolina, USA	34.691667 N, -76.907778 W	34.6917	-76.9078	Light	Nutrients	Seagrass competition		Plant, Community, & Environment	Growth	Physiological Measures	Shoot Density		Distribution	Seagrass competition	Invertebrates	Chlorophyll A	Water Column Nutrients	Water Column Turbidity					Huggins Island, Bogue Sound, North Carolina, USA	34.665278 N, -77.111389 W	34.6653	-77.1114	Piney Island, Bogue Sound, North Carolina, USA	34.683056 N, -77.008889 W	34.6831	-77.0089
Alternative Stable States Driven by Density-Dependent Toxicity	van der Heide, van Nes, van Katwijk, Scheffer, Jan Hendriks & Smolders	2010	2022-12-04	Hannnah Lyford			Model		marina		Institute for Wetland and Water Research, Radboud University Nijmegen, Netherlands	51.8220° N, 5.8638° E	51.822	5.8638	Nutrients	Toxins			Plant & Environment	Physiological Measures	Shoot Density							Water Column Nutrients	Sediment Nutrients
Ammonium toxcicity in eelgrass Zostera marina	van Katwijk et al. 1997	1997	2021-06-12	Caroline Thorpe	Mesocosm	Manipulative			marina		Goes, Southwest Netherlands	51° 32' N, 3° 50' E	51.5333	3.83333	Nutrients				Plant & Environment	Growth	Physiological Measures	Shoot Density						Water Column Nutrients	Sediment Nutrients					Eems and Terschelling, Dutch Wadden Sea
Ammonium Uptake Rates in a Seagrass Bed under Combined Waves and Currents	LG Gillis et. all	2017	2022-10-14	Carolina Salcedo	Mesocosm	Manipulative			noltii		Oosterschelde tidal lagoon in Yerseke, Netherlands	51° 27' 59.22" N 4° 4' 30.72" E	51.4665	4.0752	Hydrodynamics	Nutrients			Plant	Growth
An annual nitrogen budget for a seagrass Zostera marina population	Pedersen & Borum, 1993	1993	2022-04-10	Hannah Lyford	Field	Survey			marina		Oresund, Copenhagen, Denmark	55.6761° N, 12.5683° E	55.6761	12.5683	Nutrients				Plant & Environment	Growth	Physiological Measures							Water Column Nutrients	Sediment Nutrients
An assessment of the functional variability of selected coastal ecosystems in the context of local environmental changes	Baird	2009	2022-12-02	Sarah Joy Bittick			Model		capensis		The Kromme River estuary, Eastern Cape, South Africa	(348090 S 248510 E	-34.15	24.85	Nutrients	Temperature	Oxygen		Community & Environment					Organismal Diversity				Water Column Temperature	Water Column Salinity	Water Column Nutrients	Water Column Dissolved Oxygen
An evaluation of factors controlling the abundance of epiphytes on Zostera marina along an estuarine gradient in Yaquina Bay, Oregon, USA	Walter G. Nelson 2018	2018	2022-11-14	Sadie Kenny	Field	Survey			marina		Estuarine gradient within Yaquina Bay, Oregon		44.61	-124.01	Nutrients	Light	Herbivory		Community					Epiphytes
Analysing the dynamics and relative influence of variables affecting ecosystem responses using functional PCA and boosted regression trees: A seagrass case study	Wu et al.	2019	2023-02-06	Sarah Joy Bittick			Model		mulleri	marina					Anthropogenic Use	Light			Plant & Environment	Shoot Density	Growth	Reproductive Output						Water Column Turbidity
Annual and perennial life histroy strategies of Zostera marina populations under different light regimes	S. H. Kim et al. 2014	2014	2022-11-12	Emma Guerrini Romano	Field	Survey			marina		Jondong Bay, Korea		36.1	128.533	Light				Plant	Shoot Density	Growth	Photosynthetic Output	Shoot Survival
Annual cycle of biomass of a threatened population of the intertidal seagrass Zostera japonica in Hong Kong	Lee 1997	1997	2021-06-24	James Roe	Field	Manipulative			japonica		San Tau, Lantau Island, Hong Kong	113°55'E, 22°17'N	22.2833	113.917	Light	Sediment			Plant, Community, & Environment	Shoot Density	Growth			Invertebrates				Water Column Temperature	Water Column Salinity	Water Column Dissolved Oxygen
Annual dynamics of benthic primary production by macrophytes on a sand flat in the eutrophic Hiroshima Bay, Japan	Otani et al.	2020	2022-10-03	Sarah Joy Bittick	Field	Survey			marina	japonica	Hiroshima Bay		34.3255	132.324	Nutrients				Plant & Community	Growth	Photosynthetic Output	Physiological Measures		Macroalgae
Annual variation in leaf photosynthesis and leaf nutrient content of four Mediterranean seagrasses	Susana Enriquez et al. 2004	2004	2022-05-17	Sadie Kenny	Field	Survey			marina		NE Spanish Mediteterranean coast	42° 18.26' N, 3°18.11' E	42.3043	3.30183	Temperature	Light			Plant	Growth	Photosynthetic Output	Physiological Meaures
Annual variations of biomass and photosynthesis in Zostera marina at its southern end of distribution in the North Pacific	Cabello-Pasini et al. 2003	2003	2021-06-14	Devin Ferguson	Field	Survey			marina		San Quintin Bay, Baja California, Mexico	30°25'N 116°00'W	30.4167	-116	Light	Temperature			Plant & Environment	Shoot Density	Growth	Photosynthetic Output						Sediment Characteristics	Sediment Nutrients	Water Column Temperature				Ojo de Liebre Lagoon, Baja California, Mexico	27°40'N 114°05'W	27.6667	-114.083	San Ignacio Lagoon, Baja California, Mexico	26°55'N 113°10'W	26.9167	-113.167
Annual aboveground biomass and productivity estimates for intertidal eelgrass (Zostera marina L.)in Cobscook Bay, Maine	Brian F. Beal et al. 2004	2004	2022-05-18	Sadie Kenny	Field	Survey			marina		Cobscook Bay, Maine (Bell Farm and Mahar Cove) and Weir Cove	44°49.37'N, 67°09.34'W and 44° 53.16'N, 67° 08.48'W and 47°48.81'N, 677°08.29'W	44.8333	-67.15	Temperature				Plant & Environment	Growth	Shoot Density							Water Column Temperature	Water Column Salinity	Sediment Nutrients
Anthesis and Seed Production in Zostera marina L. (Eelgrass) from the Chesapeake Bay	Silberhorn et al. 1983	1983	2022-03-18	Devin Ferguson	Field	Survey			marina		Mobjack Bay near Browns Bay, Chesapeake Bay, Virginia, US		37.3373	-76.3632	Temperature				Plant	Reproductive Output														Mouth of the York River adjacent to the Guinea Marshes, Chesapeake Bay, Virginia, US		37	-76	western side of the Eastern Shore of Virginia, Vaucluse Shores, Chesapeake Bay, US		37	-75
Anthropogenic and natural disturbance effects on a macrobenthic estuarine community over a 10-year period	Cardoso et al, 2007	2007	2022-11-14	Hannah Lyford	Field	Manipulative			noltii		Mondego Estuary, Portugal	40°08′N, 8°50′S	41.3333	-8.83333	Nutrients	Hydrodynamics	Light		Plant, Community, & Environment	Growth	Shoot Density	Photosynthetic Output		Distribution	Macroalgae	Invertebrates	Organismal Diversity	Water Column Nutrients	Water Column Turbidity	Sediment Nutrients
Anthropogenic Impact on Zostera noltei Seagrass Meadows (NW Iberian Peninsula) Assessed by Carbon and Nitrogen Stable Isotopic Signatures		2019	2022-09-27	Sarah Joy Bittick	Field	Survey			noltii	noltei	Caldebarcos, Spain		42.8503	-9.10783	Anthropogenic Use	Nutrients			Plant, Community, & Environment	Physiological Measures				Epiphytes				Sediment Characteristics	Sediment Nutrients					Lourizan		42.4122	-8.67433	A Ramallosa		42.1188	-8.81867
Anthropogenic nutrient inputs in the NW Iberian Peninsula estuaries determined by nitrogenand carbon isotopic signatures of Zostera noltei seagrass meadows	M. Román et al. 2019	2019	2022-06-09	Sadie Kenny	Field	Survey			noltii		Estuarine complexes of the NW Iberian Peninsula		43.3524	-8.6915	Anthropogenic Use				Plant & Environment	Physiological Meaures								Sediment Characteristics	Sediment Nutrients
Anti-oxidative feedback and biomarkers in the intertidal seagrass Zostera japonica induced by exposure to copper, lead and cadmium	H Lin et. al 2016	2016	2022-10-14	Carolina Salcedo	Mesocosm	Manipulative			japonica		Intertidal Zone of the Huiquan Bay, Qingdao, northern China	36° 3' N 120° 12' 36" E	36.05	120.21	Herbicides				Plant		Physiological Measures
Application and assessment of a nutrient pollution indicator using eelgrass (Zostera marina L.) in Barnegat Bay-Little Egg Harbor estuary, New Jersey	Fertig & Kennish	2012	2022-12-01	Hannnah Lyford	Field	Survey		Management	marina		Barnegat Bay-Little Egg Harbor, New Jersey, USA	39.857750, -74.101496	39.8578	-74.1015	Nutrients	Light	Oxygen		Plant, Community, & Environment	Shoot Density	Physiological Measures	Shoot Survival		Distribution	Organismal Diversity	Invertebrates		Water Column Turbidity	Water Column Dissolved Oxygen	Water Column Nutrients
Application of an ecosystem model for the environmental assessment of the reclamation and mitigation plans for seagrass beds in Atsumi Bay	Sohma, Sekiguchi, Nakata	2009	2022-11-26	Hannnah Lyford			Model	Restoration	marina		Atsumi Bay, Japan	34°45′ N, 137°10′ E	34.75	137.167	Nutrients	Oxygen	Anthropogenic Use		Plant, Community, & Environment	Photosynthetic Output	Growth	Shoot Density		Invertebrates	Distribution			Water Column Nutrients	Water Column Turbidity	Water Column Dissolved Oxygen
Application of the coastal ecosystem complex concept toward integrated management for sustainable coastal fisheries under oligotrophication	Hori et al	2018	2023-01-14	Hannah Lyford	Field	Manipulative		Management	marina		Seto Inland Sea, Japan	34.1667 N, 133.3333 E	34.1667	133.333	Nutrients	Aquaculture Impacts	Light		Plant, Community, & Environment	Shoot Density	Physiological Measures	Shoot Survival		Invertebrates	Organismal Diversity	Distribution		Water Column Turbidity	Water Column Nutrients	Sediment Characteristics				Thau lagoon, France	43.41 N, 3.6241 E	43.41	3.6241
Applying quality status criteria to a temperate estuary before and after mitigation measures to reduce eutrophication symptoms	A. I. Lillebø et al. 2007	2007	2022-06-20	Emma Guerrini Romano	Field	Survey			noltii		Mondego Estuary, Portugal		40.1236	-8.83905	Nutrients				Plant, Community, & Environment	Growth				Chlorophyll A	Macroalgae			Water Column Dissolved Oxygen	Water Column Nutrients	Water Column Turbidity
Are large macroalgal blooms necessarily bad? nutrient impacts on seagrass in upwelling-influenced estuaries	Hessing-Lewis et al. 2015	2015	2021-06-21	James Roe	Mesocosm	Manipulative			marina		Yaquina Bay, at Idaho Point	44°37'1" N, 124°1'43" W	44.6169	-124.029	Nutrients				Plant, Community, & Environment	Shoot Density	Growth			Macroalgae				Water Column Temperature	Water Column Salinity	Water Column Dissolved Oxygen	Water Column pH		Sediment Characterstics, Water Column Turbidity
Are seagrass growth and survival constrained by the reducing conditions of the sediment?	J. Terrados et al. 1999	1999	2022-07-04	Emma Guerrini Romano	Field	Manipulative			marina		Roskilde Fjord, Denmark		55.925	12.0417	Sediment	Carbon			Plant & Environment	Shoot Density	Growth							Water Column Nutrients	Sediment Characteristics
Artificial seed germination and seedling production of Zostera marina L. by salinitymanipulation	LIU Yunlong et al. 2016	2016	2022-06-02	Sadie Kenny	Mesocosm	Manipulative			marina		Sanggou Bay, Rongcheng, Shandong Province of China	37.042 0°N, 122.572 6°E	37.042	122.572	Salinity				Plant	Growth	Reproductive Output
Assessing behavioural and social responses to an eco-mooring trial for Zostera marina conservation management in Torbay, Southwest England	Parry-Wilson et al	2019	2023-01-16	Hannah Lyford	Field	Manipulative		Management	marina		Fishcombe Cove, Torbay, Devon, UK	50.402781, -3.522807	50.4028	-3.52281	Anthropogenic Use				Plant & Community	Shoot Density	Shoot Survival			Distribution
Assessing Potential Benthic Impacts of Harvesting the Pacific Geoduck Clam Panopea generosa in Intertidal and Subtidal Sites in British Columbia, Canada	Liu, Pearce, & Dovey	2015	2022-11-26	Hannnah Lyford	Field	Manipulative			marina		Cortes Island, British Columbia, Canada	50.033333 N, -124.966667 W	50.0333	-124.967	Aquaculture Impacts	Sediment			Plant, Community, & Environment	Shoot Survival	Physiological Measures			Distribution	Invertebrates	Organismal Diversity		Sediment Characteristics	Water Column Turbidity					Nanoose Bay, BC, Canada	49.268244 N, -124.178817 W	49.2682	-124.179
Assessing reference conditions according to the European Water Framework Directive using modelling and analysis of historical data: An example from Randers Fjord, Denmark	Nielsen et al.	2003	2022-11-28	Sarah Joy Bittick	Field	Survey	Model		marina		Randers Fjord		56.5845	10.2637	Nutrients				Plant, Community, & Environment	Growth				Chlorophyll A	Invertebrates	Distribution		Water Column Nutrients	Water Column Dissolved Oxygen	Water Column Turbidity	Sediment Characteristics
Assessing the efficiencies and challenges for nutrient uptake by aquatic plants	C. Angove et al. 2018	2018	2022-06-26	Emma Guerrini Romano	Field	Manipulative			marina		Tvärminne Zoological Station, Hanko Peninsula, Finland		59.9444	23.2489	Nutrients				Plant & Environment	Physiological Measures	Growth							Water Column Nutrients	Sediment Nutrients
Assessing the potential benthic-pelagic coupling in episodic blue mussel (Mytilus edulis) settlement events within eelgrass (Zostera marina) communities	Bologna, Fetzer, McDonnell, Moody	2005	2022-11-30	Hannnah Lyford	Field	Survey			marina		Barnegat Bay, NJ, USA	39°47.70′N, 74°08.10′W	39.795	-74.135	Invertebrates	Nutrients	Light		Community & Environment					Distribution	Invertebrates	Macroalgae	Organismal Diversity	Water Column Nutrients	Water Column Turbidity	Water Column Temperature
Assessing the toxicity of ammonium pulses to the survival and growth of Zostera noltii	Fernando G. Brun et al. 2002	2002	2021-06-07	Sadie Kenny	Mesocosm	Manipulative			noltii		Intertidal mudflats at Los Torunos, Cadiz Bay Natural Park	36° 30' N, 6° 10' W	36.5	-6.16667	Nutrients				Plant	Growth	Physiological Meaures
ASSESSMENT OF ENVIRONMENTAL SUITABILITY FOR GROWTH OF ZOSTERA-MARINA L (EELGRASS) IN SAN-FRANCISCO BAY	Alberte, Reguzzoni, Wyllie-Echeverria, Zimmerman, 1991	1991	2021-10-21	Hannah Lyford	Field	Survey			marina		Point Molate, San Francisco Bay, CA	37.9414° N, 122.4107° W	37.9414	-122.411	Light	Nutrients			Plant & Community	Photosynthetic Output				Distribution
Assessment of genetic diversity of seagrass populations using DNA fingerprinting: Implications for population stability and management	Alberte et al, 1993	1993	2022-04-10	Hannah Lyford	Field	Survey			marina		Elkhorn Slough, California, USA	36.8058° N, 121.7902° W	36.8058	-121.79	Genomics	Habitat Fragmentation	Anthropogenic Use		Plant & Community	Reproductive Output	Growth			Distribution										Tomales Bay, California, USA	38.1713° N, 122.9128° W	38.1713	-122.913	Del Monte Beach, California, USA	36.6055° N, 121.8689° W	36.6055	-121.869
Assessment of spatial distribution of submerged vegetation in the Orbetello lagoon by means of a mathematical model	Guisti, Marsili-Libelli, Renzi & Focardi	2010	2022-12-17	Hannah Lyford			Model		noltii		Ortobello Lagoon, Italy	42◦26′34′′N; 11◦13′29′′E	42.4428	11.2247	Nutrients	Sediment	Light	Hydrodynamics	Plant, Community, & Environment	Shoot Density	Growth	Physiological Measures		Macroalgae	Organismal Diversity			Water Column pH	Sediment Characteristics	Water Column Nutrients	Water Column Turbidity
Assessment of the ameliorating effect of sedimentary iron inputs on sulfide stress in eelgrass beds	Li et al. 2020	2020	2021-06-23	James Roe	Field	Manipulative			marina		Swan Lake, Shandong Peninsula, China	37.3382°N, 122.5551°E	37.3382	122.555	Toxins				Plant	Shoot Density	Physiological Measures	Growth										Shoot Mortality
Assessment of the establishment success of Zostera marina (eelgrass) from seeds in natural waters: Implications for large-scale restoration	Li, Liu, Liu, Xu, Yang, Zhang	2016	2022-12-19	Hannah Lyford	Mesocosm	Manipulative	Restoration		marina		Swan Lake, Shandong Peninsula, China	N37°20′ 58.2″; E122°34′48.4″	37.3495	122.58	Temperature	Light			Plant & Environment	Physiological Measures	Shoot Survival	Shoot Density						Water Column Temperature	Water Column Turbidity
Assessment of light history indicators for predicting seagrass biomass	M.P. Adams et al. 2015	2015	2021-06-24	Sadie Kenny	Field	Survey			mulleri		Lake Macquarie, New South Wales, Australia	33° 05' 06" S, 151° 34' 06" E	-33.085	151.568	Light				Plant	Growth														Tuggerah Lake, New South Wales, Australia	33° 18' 35" S, 151° 29' 29" E	-33.3097	151.491
Assimilation of organic matter by two benthic consumers across gradients of latitude and nutrient enrichment	Nicastro et al.	2017	2023-01-16	Sarah Joy Bittick	Field	Survey			mulleri		New South Wales, Australia		-32.7173	152.024	Nutrients				Plant, Community, & Environment	Physiological Measures				Invertebrates	Distribution	Chlorophyll A		Sediment Characteristics	Water Column Nutrients
Bacterial interactions in the rhizosphere of seagrass communities in shallow coastal lagoons	Donelly and Herbert	1999	2022-10-04	Sarah Joy Bittick	Field	Survey	Review		noltii		Bassin d'Ar- cachon, France		44.6772	-1.11631	Nutrients	Microbiome			Community & Environment					Microbial Diversity	Epiphytes			Sediment Characteristics
Benthic carbon metabolism in southeast Australian estuaries: habitat importance, driving forces, and application of artificial neural network models	Maher & Eyre	2011	2022-12-22	Hannah Lyford	Field	Survey			capricorni		Hastings River Estuary, SE Australia	31°25′48″S 152°55′12″E	-31.43	152.92	Hydrodynamics	Light	Temperature	Carbon	Plant, Community, & Environment	Photosynthetic Output	Physiological Measures			Distribution	Organismal Diversity	Macroalgae		Water Column Temperature	Water Column Nutrients	Sediment Characteristics	Sediment Nutrients			Camden Haven Estuary, SE Australia	31.665104 S, 152.612427 E	-31.6651	152.612	Wallis Lake Estuary, SE Australia	32.270772 S, 152.475387 E	-32.2708	152.475
Benthic decomposition of Zostera marina roots: a controlled laboratory experiment	Neubauer et al.	2004	2022-11-29	Sarah Joy Bittick	Mesocosm	Manipulative			marina		Skaering Beach, Aarhus Bay		56.2144	10.2987	Nutrients	Sediment			Plant, Community, & Environment	Physiological Measures				Microbial Diversity				Sediment Characteristics	Water Column Nutrients	Water Column Dissolved Oxygen	Sediment Nutrients
Benthic fluxes of dissolved organic carbon in three temperate Australian estuaries: Implications for global estimates of benthic DOC fluxes	Eyre & Maher	2010	2022-12-17	Hannah Lyford	Field	Survey			capricorni		Hastings River, Southeast Australia	31°25′S, 152° 50′E	-31.4167	152.833	Light	Carbon			Plant, Community, & Environment	Physiological Measures	Photosynthetic Output			Macroalgae	Microbial Diversity	Organismal Diversity		Water Column Turbidity	Water Column Dissolved Oxygen	Sediment Nutrients	Sediment Characteristics			Camden Haven, Southeast Australia	31°39′S, 152°47′E	-31.65	152.783	Wallis Lake, Southeast Australia	32°15′S, 152°28′E	-32.25	152.467
Benthic macrofauna changes in areas of Venice lagoon populated by seagrasses or seaweeds	Sfriso et al. 2001	2001	2022-02-23	Devin Ferguson	Field	Survey			marina		three basins in the Venice Lagoon		42	12	Nutrients	Temperature	Sediment		Plant & Community	Growth				Invertebrates	Seagrass competition	Macroalgae	Organismal Diversity
Benthic metabolism in shallow coastal ecosystems of the Banc d'Arguin, Mauritania	Clavier et al	2014	2022-12-17	Hannah Lyford	Field	Survey			noltii		Banc d’Arguin, Mauritania	20.529814, -16.403343	20.5298	-16.4033	Temperature	Light	Carbon		Plant, Community, & Environment	Physiological Measures	Photosynthetic Output			Chlorophyll A	Organismal Diversity			Water Column Dissolved Oxygen	Water Column Temperature	Water Column Turbidity
Benthic nitrogen fixation in Zostera marina meadows in an upwelling-influenced coastal lagoon	Hernandez-Lopez, Camachi-Ibar, Macias-Tapia, McGlathery, Daessle, Sandoval-Gil	2017	2022-12-29	Hannah Lyford	Field	Survey			marina		San Quintín Bay, Mexico	30º27 N, 116º00 W	30.45	-116	Nutrients	Light	Microbiome	Aquaculture Impacts	Plant, Community, & Environment	Photosynthetic Output	Physiological Measures			Chlorophyll A	Microbial Diversity	Invertebrates		Water Column Turbidity	Water Column Nutrients	Sediment Characteristics	Sediment Nutrients
Benthic primary production in emerged intertidal habitats provides resilience to high water column turbidity	Dryliea, Lohrer, Needham, Bulmer, & Pilditch	2018	2023-01-18	Hannah Lyford	Field	Manipulative			mulleri		Kaipara Harbour, New Zealand	-36.386396, 174.219612	-36.3864	174.22	Light	Sediment	Oxygen		Plant & Environment	Physiological Measures	Photosynthetic Output	Shoot Density						Water Column Dissolved Oxygen	Water Column Turbidity	Water Column pH	Sediment Characteristics
Biochemical characterization of the eelgrass Zostera marina at its southern distribution limit in the North Pacific	Alejandro Cabello-Pasini et al. 2003	2003	2022-05-27	Sadie Kenny	Field	Survey			marina		San Quintín Bay, Baja California Peninsula		30.421	-115.966	Light	Temperature			Plant	Physiological Meaures														Ojo de Liebre Lagoon, Baja California Peninsula		27.6604	-114.103	San Ignacio Lagoon, Baja California Peninsula		26.9	-113.217
Biodegradable plastic bags on the seafloor: a future threat for seagrass meadows?	Elena Balestri et al.	2017	2022-12-10	Mehana Muranaka	Mesocosm	Manipulative			noltii		northwestern mediterrranean livorno italy		43.5477	10.3065	Anthropogenic Use	Seagrass competition	Sediment		Plant, Community, & Environment	Shoot Survival	Growth	Reproductive Output		Seagrass competition				Sediment Characteristics	Water Column Temperature	Sediment Nutrients		Marine plastic litter
Biodiversity influences ecosystem functioning in aquatic angiosperm communities	Bostrom, Gustafsson	2011	2022-12-02	Hannnah Lyford	Mesocosm	Manipulative			marina		Faro Island, Finland	59° 55' 219"N, 21° 47' 11" E	59.9775	21.7864	Seagrass competition	Nutrients			Plant, Community, & Environment	Physiological Measures	Shoot Density	Growth		Distribution	Organismal Diversity	Invertebrates		Sediment Characteristics	Sediment Nutrients
Biodiversity mediates top-down control in eelgrass ecosystems: a global comparative-experimental approach	Duffy et al	2015	2022-12-19	Hannah Lyford	Field	Manipulative			marina		15 sites with no exact coordinates or names given	32–67° N			Nutrients	Temperature	Herbivory	Genomics	Plant, Community, & Environment	Physiological Measures	Shoot Density	Growth	Shoot Survival	Distribution	Organismal Diversity	Invertebrates	Macroalgae	Water Column Temperature	Water Column Nutrients	Water Column Turbidity	Water Column Salinity	Light
Biogeochemical implications for phosphorus cycling in sandy and muddy rhizosphere sediments of Zostera marina meadows (Denmark)	M Holmer et. al 2006	2006	2022-10-22	Carolina Salcedo	Mesocosm	Manipulative			marina		A coastal site on southwest coast of Fyn, Lillebaelt, Denmark	55° 28' 57.54" N 9° 43' 57.36" E	55.4826	9.7326		Sediment	Nutrients		Environment									Sediment Nutrients	Water Column Nutrients	Sediment Characteristics
Biogeographical patterns of tunicates utilizing eelgrass as substrate in the western North Atlantic between 39 degrees and 47 degrees north latitude (New Jersey to Newfoundland)	Carman et al.	2019	2023-02-06	Sarah Joy Bittick	Field	Survey			marina		39 to 47 North (New Jersey to Newfoundland) 33 sites (all avialble: http://www.reabic.net/journals/mbi/2019/Supplements/MBI_2019_Carman_etal_SupplementaryTable.xlsx)		47.1653	-55.1128	Invasion				Plant, Community, & Environment	Shoot Density				Invertebrates	Organismal Diversity			Water Column Temperature
Biomass - density relationships of the seagrass Zostera noltii: a tool for monitoring anthropogenic nutrient disturbance	S. Cabaço et al. 2007	2007	2022-11-24	Emma Guerrini Romano	Field	Survey			noltii		Arade Estuary, Portugal		37.1386	-8.53295	Nutrients				Plant & Environment	Shoot Density	Growth							Water Column Nutrients	Water Column Turbidity					Faro NW, Ria Formosa		37.0076	-7.9396	Tavira, Ria Formosa		37.0277	-7.81873
BIOMASS ACCUMULATION AND SHADING EFFECTS OF EPIPHYTES ON LEAVES OF THE SEAGRASS, HETEROZOSTERA TASMANICA, IN VICTORIA, AUSTRALIA	Bulthuis 1983	1983	2021-06-07	James Roe	Field	Survey			tasmanica		Charing Cross and San Remo in Western Port and Edwards Point in Port Phillip Bay, Victoria, Australia	38°12'49.6"S 144°41'53.2"E	-38.2138	144.698	Epiphytes				Plant	Physiological Measures
Biomass and Growth of Zostera Capricorni Aschers. in Port Hacking, N.S.W., Australia	Kirkman & Cook 1982	1982	2021-06-04	Devin Ferguson	Field	Survey			capricornii		South West Arm of Port Hacking, New South Wales, Australia	34°04'36"S 151°07'36"E	-34.0767	151.129	Temperature	Light			Plant	Growth
Biomass development and photosynthetic potential of intertidal Zostera capricorni in New Zealand estuaries	Turner and Schwarz	2006	2022-10-11	Sarah Joy Bittick	Field	Survey			capricornii		four sites on the Coromandel Peninsula, New Zealand	Whangapoua Harbour (36°44′S, 175°39′E)	-36.7333	175.65	Light				Plant & Environment	Shoot Density	Growth	Photosynthetic Output	Physiological Measures					Water Column Turbidity						Wharekawa Harbour (37°07′S, 175°53′E; referred to as ‘WK’)		-37.1167	175.883	and Whangamata Harbour (37°11′S, 175°52′E; referred to as ‘WM’).		-37.1833	175.867
Biomass variation and autotrophic production of an epiphyte-macrophyte community in a coastal Danish area: 1. Eelgrass (Zostera marina L.) biomass and net production	Wium-Andersen and Borum	1984	2022-09-21	Sarah Joy Bittick	Field	Survey			marina		Oresund, Denmark, Hvidore 10 km North of Copenhagen		55.6281	12.5049	Light	Temperature			Plant, Community, & Environment	Reproductive Output	Growth	Shoot Density		Epiphytes				Water Column Temperature	Water Column Salinity
Biomass variation and autotrophic production of an epiphyte-macrophyte community in a costal Danish area: II. Epiphyte species composition, biomass and production	J. Borum et al. 1984	1984	2022-08-29	Emma Guerrini Romano	Field	Survey			marina		Hvidøre, Øresund, Denmark		55.7713	12.6101	Epiphytes				Plant & Community	Shoot Survival				Distribution
Biomass dynamics of seagrasses and the role of mangrove and seagrass vegetation as different nutrient sources for an intertidal ecosystem	de Boer, 2000	2000	2022-10-20	Hannah Lyford	Field	Survey			capensis		Inhaca Island, Mozambique	26° 07'S, 32°56'E	-26.1167	32.9333	Nutrients	Light			Plant, Community, & Environment	Growth	Shoot Density	Physiological Measures		Distribution				Water Column Nutrients	Sediment Nutrients	Water Column Turbidity
Biomass, net production and growth dynamics in an eelgrass (Zostera marina L.) populaiton in Vellerup Vig, Denmark	Sand-Jensen 1975	1975	2021-06-03	Devin Ferguson	Field	Survey			marina		Vellerup Vig, Isefjord, Inner Broad, Zealand, Denmark	55°44"N 11°52'E	55.7333	11.8667	Light	Temperature			Plant	Growth
Biomass-dependent seagrass resilience to sediment eutrophication	Rebecca V. Gladstone-Gallagher	2018	2022-12-10	Mehana Muranaka	Field	Manipulative			mulleri		Tauranga harbour new zealand		-37.5797	176.018	Nutrients				Plant, Community, & Environment	Growth	Physiological Measures			Chlorophyll A	Organismal Diversity	Distribution		Sediment Characteristics	Water Column Nutrients
Biotic and Abiotic Conditions Can Change the Reproductive Allocation of Zostera marina Inhabiting the Coastal Areas of North China	Wang Ming et al. 2019	2019	2022-11-13	Sadie Kenny	Field	Survey			marina		Lidao Bay, tidal basin in the northeast of Shandong Peninsula (Shandong Province, North China)		37.246	122.586	Nutrients	Temperature	Sediment		Plant	Growth	Reproductive Output
BIVALVE AQUACULTURE AND EELGRASS (ZOSTERA MARINA) COVERAGE ON A BAY-WIDE SCALE UTILIZING BATHYMETRIC LIDAR AND AERIAL PHOTOGRAPHY	Niles et al	2014	2022-12-29	Hannah Lyford	Field	Survey			marina		Caraquet Harbor, Southern Gulf of St Lawrence, Canada	47.798971, -64.946723	47.799	-64.9467	Aquaculture Impacts	Light	Invertebrates		Plant, Community, & Environment	Shoot Density				Distribution	Invertebrates			Water Column Turbidity	Sediment Characteristics					Miscou Harbour, Southern Gulf of St Lawrence, Canada	48.000926, -64.486629	48.0009	-64.4866	Tracadie Bay, Southern Gulf of St Lawrence, Canada	47.550826, -64.877602	47.5508	-64.8776	Richibucto Harbour, Southern Gulf of St Lawrence, Canada	46.698994, -64.833139	46.699	-64.8331	Bouctouche Bay, Southern Gulf of St Lawrence, Canada	46.514380, -64.673951	46.5144	-64.674
Blue Carbon stock in Zostera noltei meadows at Ria de Aveiro coastal lagoon (Portugal) over a decade	Sousa et al.	2019	2023-02-06	Sarah Joy Bittick	Field	Survey			noltii		l (40°38′N, 8°44′W		40.6333	-8.73333	Carbon				Plant, Community, & Environment	Growth	Physiological Measures			Distribution				Sediment Characteristics
Blue Carbon Stocks and Cross-Habitat Subsidies	Richard Hugh Bulmer et al.	2020	2022-11-10	Mehana Muranaka	Field	Survey			mulleri		Tairua Estuary east coast of the north island New Zealand		37.1496	175.523	Carbon	Sediment			Plant, Community, & Environment	Growth	Physiological Measures			Chlorophyll A	Distribution			Sediment Characteristics
Blue mussels Mytilus edulis do not interfere with eelgrass Zostera marina but fertilize shoot growth through biodeposition	Reusch et al. 1994	1994	2021-12-06	Devin Ferguson	Field	Manipulative			marina		Friedrichsort, Kiel Fjord, Western Baltic, Germany		54.3833	10.1833	Invasion	Nutrients			Plant & Environment	Shoot Density	Growth							Sediment Nutrients
Boat Propeller Scarring of Seagrass Beds in Lower Chesapeake Bay, USA: Patterns, Causes, Recovery, and Management	Orth, Lefcheck, & Wilcox	2017	2022-12-27	Hannah Lyford	Field	Manipulative		Management	marina		Browns Bay, Chesapeake Bay, VA, USA	37.298520 N, 76.408419 W	37.2985	-76.4084	Anthropogenic Use	Aquaculture Impacts	Habitat Fragmentation		Plant & Community	Shoot Density	Shoot Survival			Distribution										Poquoson Flats, Chesapeake Bay, VA, USA	37.184921 N, 76.320550 W	37.1849	-76.3205
Bural of seeds and seedlings by the lungworm Arenicola hampers eelgrass (Zostera marina) recovery	Tomas Valdemarsen et al.	2011	2022-10-20	Mehana Muranaka	Mesocosm	Manipulative			marina		Odense Fjord, Denmark		55.4901	10.5429	Invertebrates	Sediment			Plant	Shoot Survival	Shoot Density
Burial of Zostera marina seeds in sediment inhabited by three polychaetes: Laboratory and field studies	Delefosse and Kristensen 2012	2012	2021-06-14	James Roe	Mesocosm	Manipulative			marina		Bregnør Bay, Odense Fjord, Fyn, Denmark	55°28'55.4"N 10°36'36.4"E	55.4821	10.6101	Invertebrates				Plant & Community	Reproductive Output				Organismal Diversity
Can pesticides, copper and seasonal water temperature explain the seagrass Zostera noltei decline in the Arcachon bay	P Gamain	2018	2022-10-01	Carolina Salcedo	Mesocosm	Manipulative			noltii		Archeron Bay, France (Near Arguin sandbar)	44°40'59.99" N -1°09'60.00" W	44.6833	-1.16667	Herbicides	Temperature			Plant	Physiological Measures	Photosynthetic Output
Can traditional harvesting methods for cockles be accommodated in a Special Area of Conservation?	Johnson, McLaughlin, & Portig	2007	2022-11-17	Hannah Lyford	Field	Manipulative		Management	noltii	angustifolia	Strangford, Lough, Ringneil Bay, United Kingdom	54.4830° N, 5.5830° W	54.483	-5.583	Anthropogenic Use	Aquaculture Impacts			Plant & Community	Growth	Shoot Density	Shoot Survival		Invertebrates	Organismal Diversity
Carbon and nitrogen dynamics of the intertidal seagrass, Zostera japonica, on the southern coast of the Korean peninsula	Jong-Hyeob Kim et al. 2016	2016	2022-06-16	Sadie Kenny	Field	Survey			japonica		Koje Bay on the southern coast of Korean penisula	34°48'N, 128°35'E	34.8	128.583	Nutrients				Plant	Physiological Meaures
Carbon and nitrogen metabolism in the seagrass, Zostera marina L.: Environmental control of enzymes involved in carbon allocation and nitrogen assimilation	Touchette and Burkholder 2007	2007	2021-06-25	James Roe	Mesocosm	Manipulative			marina		Middle Marsh, near Beaufort, North Carolina, USA	34°41'25.4"N 76°36'25.0"W	34.6904	-76.6069	Nutrients	Temperature			Plant & Environment	Physiological Measures								Water Column Salinity	Water Column pH
Carbon Sequestration in a Pacific Northwest Eelgrass (Zostera marina) Meadow	Poppe & Rybczyk	2018	2023-01-11	Hannah Lyford	Field	Survey			marina	japonica	Padilla Bay, WA, USA	48.513184, -122.514108	48.5132	-122.514	Carbon	Sediment	Nutrients		Plant, Community, & Environment	Physiological Measures	Photosynthetic Output			Distribution	Seagrass competition			Sediment Characteristics	Sediment Nutrients	Water Column Nutrients
Carbon sequestration loss following Zostera noltei decline in the Arcachon Bay (France)	Ribaudo, Plus, Ganthy, & Auby	2016	2022-12-27	Hannah Lyford	Field	Survey			noltii	marina	Arcachon Bay, France	44°40 N, 1°10 W	44.6667	-1.16667	Temperature	Light	Carbon		Plant, Community, & Environment	Shoot Density	Photosynthetic Output	Growth		Macroalgae	Distribution			Water Column Turbidity	Water Column Temperature	Water Column Dissolved Oxygen		marina
Carbon stable isotope ratios of new leaves of Zostera marina in the mid-latitude region: Implications of seasonal variation in productivity	Kim et al.	2014	2022-10-03	Sarah Joy Bittick	Field	Survey			marina		Dongdae Bay (34°52′N, 128°01′E)		34.8667	128.017	Light	Temperature	Nutrients		Plant, Community, & Environment	Physiological Measures	Growth			Chlorophyll A				Water Column Nutrients	Water Column pH	Water Column Dissolved Oxygen	Water Column Temperature			Ojiri (36°57′N 126°19′E)		36.95	126.317
Catchment land use predicts benthic vegetation in small estuaries	Cook et al	2018	2023-01-01	Hannah Lyford	Field	Survey	Model	Management	nigricaulis	mulleri	Glenelg River, SE Australia	-37.235860, 141.956597	-37.2359	141.957	Nutrients	Anthropogenic Use	Light		Plant, Community, & Environment	Shoot Density				Distribution	Macroalgae	Chlorophyll A		Water Column Nutrients	Water Column Turbidity					Moyne River, SE Australia	-38.379825, 142.240504	-38.3798	142.241	Curdies Inlet, SE Australia	-38.603655, 142.867483	-38.6037	142.867	Gellibrand Inlet, SE Australia	-38.725629, 143.172242	-38.7256	143.172	Aire River, SE Australia	-38.783481, 143.471503	-38.7835	143.472
Causes of sulfur isotope variability in the seagrass, Zostera capricorni	Oakes and Connolly	2004	2022-10-24	Sarah Joy Bittick	Field	Manipulative			capricornii		Redland Bay, southeast Queensland, Australia (27°32′S, 153°19′E)		-27.5333	153.317	Sediment				Plant & Environment	Growth	Physiological Measures							Sediment Characteristics				sulfur
Changes in benthic community structure and sediment characteristics after natural recolonisation of the seagrass Zostera muelleri	Lundquist, Jones, Parkes, & Bulmer	2018	2023-01-01	Hannah Lyford	Field	Survey		Restoration	mulleri		Waitemata Harbour, North Island, New Zealand	36° 50′ 45′′ S, 174° 43′ 02′′ E	-36.8458	174.717	Sediment	Habitat Fragmentation			Plant, Community, & Environment	Shoot Density	Growth	Physiological Measures		Distribution	Organismal Diversity	Chlorophyll A	Invertebrates	Sediment Characteristics	Sediment Nutrients	Water Column Turbidity
Changes in biodiversity and environmental stressors influence community structure of an experimental eelgrass Zostera marina system	Blake and Duffy	2012	2022-10-10	Sarah Joy Bittick	Mesocosm	Manipulative			marina		Virginia Institute of Marine Science, Gloucester Point, Virginia, USA (37.25° N, 76.50° W)		37.25	-76.5	Nutrients	Temperature	Invertebrates		Plant & Community	Growth				Epiphytes	Organismal Diversity	Macroalgae	Invertebrates
Changes in productivity assocaited with four introduced species: ecosystem transformation of 'pristine' estuary	Ruesink et al. 2006	2006	2021-11-15	Devin Ferguson	Field	Manipulative			marina	japonica	Willapa Bay, Washington		46.5403	-123.988	Invasion	Invertebrates			Plant & Community	Shoot Density	Growth			Seagrass competition	Organismal Diversity
Changes in survival, growth and photosynthetic pigment in response to iron increase in the leaf and root-rhizome tissues of eelgrass Zostera marina	JG Xu et al. 2019	2019	2022-09-30	Carolina Salcedo	Mesocosm	Manipulative			marina		Swan Lake on the eastern coast of Shandong Peninsula, China	37.3382 -37.3588 N 122.5551- 122.5793 E	37.5637	122.925	Nutrients				Plant	Photosynthetic Output	Growth	Physiological Measures
Changes in the abundance of the seagrasses Zostera marina L. (eelgrass) and Ruppia maritima L. (widgeongrass) in San Diego, California, following an El Nino event	Megan R. Johnson et al. 2003	2003	2021-06-17	Sadie Kenny	Field	Survey			marina		Kendall-Frost Reserve site, Mission Bay and Silver Strand and Coronado Cays, San Diego Bay, California	32° 47' 29" N, 117° 13' 24" W	32.7914	-117.223	Temperature				Plant & Community	Shoot Density	Growth			Distribution										Silver Strand, San Diego Bay, California	32° 38' 08" N, 117° 08' 16" W	32.6356	-117.138	Coronado Cays, San Diego Bay, California	32° 37' 15" N, 117° 07' 36" W	32.6208	-117.127
Changes in the location of biodiversity - ecosystem function hot spots across the seafloor landscape with increasing sediment nutrient loading	Thrush et al	2017	2023-01-14	Hannah Lyford	Field	Manipulative	Model		mulleri		Tapora Bank, Kaipara Harbour, New Zealand	36°39′ S, 174°29′ E	-36.65	174.483	Nutrients	Sediment	Oxygen		Plant, Community, & Environment	Physiological Measures	Shoot Density	Photosynthetic Output		Organismal Diversity	Invertebrates	Chlorophyll A	Distribution	Water Column Dissolved Oxygen	Water Column Nutrients	Sediment Nutrients	Sediment Characteristics
Changing eelgrass (Zostera marina L.) characteristics in a highly eutrophic temperate coastal lagoon	Fertig et al.	2013	2021-11-21	Devin Ferguson	Field	Survey			marina		Barnegat Bay-Little Egg Harbor Estuary, New Jersey, USA		39.75	-74.4667	Nutrients	Temperature	Salinity		Plant & Community	Growth	Shoot Density			Distribution	Macroalgae
Characterisation of environmental forcing on Zostera marina L. plastochrone interval dynamics in the Punta Banda Estuary, BC Mexico: an empirical modelling approach	Solana-Arellano, Echavarria-Heras, Leal-Ramirez	2009	2022-11-14	Hannah Lyford			Model		marina		Punta Banda Estuary, Baja California, Mexico	31.666667 N, 116.666667 W	31.6667	-116.667	Light	Nutrients	Temperature		Community & Environment					Distribution				Water Column Nutrients	Water Column Turbidity	Water Column Salinity	Water Column Temperature
Characterization and ecological implication of eelgrass life history strategies near the species' southernlimit in the western North Atlantic	Jarvis et al.	2012	2022-09-26	Sarah Joy Bittick	Field	Survey			marina		Phillips Island, NC	34° 43’ N, 76° 41’ W	34.7167	-76.6833	Temperature				Plant, Community, & Environment	Shoot Density	Reproductive Output			Chlorophyll A				Water Column Temperature	Water Column Nutrients	Water Column Salinity	Sediment Characteristics			Morgan's Island, NC	34° 66’ N, 76° 52’ W	35.1	-76.8667
Chemical Defence of a Seagrass against Microfoulers and Its Seasonal Dynamics	Guan et al. 2019	2019	2021-06-24	James Roe	Field	Survey			marina		Falckenstein beach at Kiel, Germany	54°38′ N, 10°17′ E	54.6333	10.2833	Microbiome	Light	Temperature		Plant & Environment	Physiological Measures								Water Column Salinity	Water Column Nutrients
Chlorophyll fluorescence measures of seagrasses Halophila ovalis and Zostera capricorni reveal differences in response to experimental shading	Bite et al.	2007	2022-10-12	Sarah Joy Bittick	Field	Manipulative			capricornii		Urangan (25°18.249′ 152°54.394′)		-25.3041	152.907	Light				Plant	Photosynthetic Output														Burrum Heads (25°11.349′ 152°37.559′)		-25.1892	152.626
Chlororespiration Serves as Photoprotection for Photo-Inactivated Oxygen-Evolving Complex in Zosteramarina, a Marine Angiosperm.	Tan et al.	2020	2022-09-28	Sarah Joy Bittick	Mesocosm	Manipulative			marina		Rongcheng (37 91N, 120 73E),		38.5167	121.217	Light				Plant	Photosynthetic Output	Physiological Measures
Climate change projections reveal range shifts of eelgrass Zostera marina in the Northwest Atlantic	Wilson and Lotze	2019	2022-10-13	Sarah Joy Bittick			Model		marina		Northwest Atlantic, i selected a central location	34-64 N	54.1833	-79.3833	Temperature	Light	Salinity		Plant, Community, & Environment	Physiological Measures	Growth			Distribution				Water Column Salinity	Water Column Temperature			ice
Climate-linked mechanisms driving spatial and temporal variation in eelgrass (Zostera marina L.) Growth and Assemblage Structure in Pacific Northwest Estuaries, USA	R. M. Thom et al. 2014	2014	2022-06-26	Emma Guerrini Romano	Mesocosm	Manipulative			marina		Willapa Bay, Washington, USA		46.475	-124.022	Temperature	Light			Plant & Environment	Photosynthetic Output	Reproductive Output	Growth	Shoot Density					Water Column Dissolved Oxygen								48.0356	-123.019	Clinton Bay		47.9732	-122.348
Clonal architecture in an intertidal bed of the dwarf eelgrass Zostera noltii in the Northern Wadden Sea: persistence through extreme physical perturbation and the importance of a seed bank	Zipperle et al.	2009	2022-10-26	Sarah Joy Bittick	Field	Survey			noltii		Sylt, Germany (55°2′N, 008°25′E)		55.0333	8.41667	Genomics				Plant	Physiological Measures	Shoot Density	Reproductive Output	Shoot Survival
Clonal building, simple growth rules and phylloclimate as key steps to develop functional-structural seagrass models	Drun, Vergara, Peralta, Garcia-Sanchez, Hernandez, Perez-Llorens	2006	2022-12-17	Hannah Lyford			Model		noltii		Cádiz Bay Natural Park, Spain	36.510863 N, 6.178326 W	36.5109	-6.17833	Light	Sediment	Nutrients	Hydrodynamics	Plant, Community, & Environment	Physiological Measures	Shoot Density	Growth		Distribution	Seagrass competition			Water Column Nutrients	Water Column Turbidity	Sediment Characteristics	Sediment Nutrients			Ria Formosa, Portugal	37.0182° N, 8.0032° W	37.0182	-8.0032	Zandkreek, Oosterschelde Estuary, The Netherlands	51.5450° N, 3.8100° E	51.545	3.81
CO2 and nutrient-driven changes across multiple levels of organization in Zostera noltii ecosystems	Martinez-Crego et al.	2014	2022-10-17	Sarah Joy Bittick	Mesocosm	Manipulative			noltii		Rio Formosa, Portugal	36◦59040 N 7◦58000 W	36.8278	-7.96667	Nutrients	Acidification			Plant, Community, & Environment	Shoot Density	Shoot Density	Physiological Measures	Reproductive Output	Macroalgae	Epiphytes	Invertebrates		Water Column Nutrients						37.0208	37◦01015 N 8◦00056.50 W		-8.01569
CO2 sequestration and the fate of organic matters within seagrass (Zostera marina) ecosystem	Y. Suzuki et al. 2003	2003	2022-09-10	Emma Guerrini Romano	Field	Survey			marina		Aburatsubo Bay, Misaki, Kanagawa prefecture, Japan		35.1594	139.616	Carbon	Nutrients			Plant & Environment	Physiological Measures	Growth							Water Column Nutrients
CO2-ENRICHMENT EFFECTS ON EELGRASS (ZOSTERA MARINA L.) AND BULL KELP (NEREOCYSTIS LUETKEANA (MERT.) P. & R.)	Thom 1996	1996	2021-06-21	James Roe	Mesocosm	Manipulative			marina		Battelle Marine Sci- ences Laboratory (MSL), Sequim, Washington	48°05'N, 123°03'W	48.0833	-123.05	Carbon				Plant & Environment	Photosynthetic Output	Growth							Water Column Dissolved Oxygen
Coastal management using oyster-seagrass interactions for sustainable aquaculture, fisheries and environement	Masakazu Hori et al.	2019	2023-01-19	Mehana Muranaka	Field	Manipulative			marina		Seto Inland Sea located in southwestern part of the main island of the japanese archapeligo		34.1667	133.333	Nutrients	Aquaculture Impacts			Plant & Community	Growth				Invertebrates	Epiphytes
Coastal retreat and improved water quality mitigate losses of seagrass from sea level rise	Megan I. Saunders et al.	2013	2022-10-29	Mehana Muranaka	Mesocosm	Manipulative			mulleri		Moreton Bay, southeast queensland, australia		-27.445	153.204	Hydrodynamics	Light	Anthropogenic Use		Plant & Environment	Shoot Survival								Water Column Turbidity
Coexistence between Zostera marina and Zostera japonica in seagrass beds of the Seto Inland Sea, Japan	K. Sugimoto et al. 2017	2017	2022-09-07	Emma Guerrini Romano	Field	Survey			marina	japonica	Hiroshima Bay, Seto Inland Sea, east coast of Yamaguchi Prefecture, Japan		34	132.2	Seagrass competition	Light	Temperature		Plant & Community	Shoot Density	Growth			Distribution
Combined impact of water column oxygen and temperature on internal oxygen status and growth of Zostera marina seedlings and adult shoots	Ane Løvendahl Raun & Jens Borum 2013	2013	2022-05-26	Sadie Kenny	Mesocosm	Manipulative			marina		Z. marina beds in Øresund, Denmark	55°53′52.67′′N, 12°32′10.93′′E	55.898	12.5364	Temperature	Oxygen			Plant	Growth	Physiological Meaures													Roskilde Fjord, Denmark	55°47′ 33.26′′N, 12°03′26.03′′E	55.7926	12.0572
Combined nutrient and macroalgae loads lead to response in seagrass indicator properties	Qiuying Han et al. 2016	2016	2022-11-13	Sadie Kenny	Field	Manipulative			marina		Swan Lake, eastern part of the Shandong peninsula on the north coast of the Yellow Sea of China	N36°43′-37°27′, E122°09′-122°42′	36.7167	122.15	Nutrients	Light			Plant & Environment	Growth	Physiological Measures							Sediment Nutrients
Community-level carbon flux variability over a tidal cycle in Zostera marina and Z. noltii beds	Ouisse et al. 2011	2011	2021-06-07	James Roe	Field	Survey			marina	mulleri	Roscoff (western English Channel, France)	48° 44.299 N, 3° 58.390 W.	48.7383	-3.88983	Hydrodynamics				Plant, Community, & Environment	Growth		Chlorophyll A	Macroalgae	Epiphytes				Water Column Temperature
Comparative effects of water-column nitrate enrichment on eelgrass Zostera marina, shoalgrass Halodule wrightii, and widgeongrass Ruppia maritima	Burkholder, Glasgow Jr, & Cooke, 1994	1994	2022-04-10	Hannah Lyford	Mesocosm	Manipulative			marina		Beaufort Inlet, North Carolina, USA	34.6937732 N, -76.6663185 W	34.6938	-76.6663	Nutrients	Temperature			Plant, Community, & Environment	Physiological Measures	Growth	Shoot Density		Macroalgae				Water Column Nutrients	Water Column Temperature
COMPARATIVE STUDY ON POPULATIONS OF ZOSTERA MARINA L. (EELGRASS): IN SITU NITROGEN ENRICHMENT AND LIGHT MANIPULATION	Lent et al. 1995	1995	2021-06-22	James Roe	Field	Survey			marina		Grevelingen, southwestern Netherlands	51°42'24.4"N 4°02'35.9"E.	51.7068	4.04331	Nutrients	Light			Plant	Growth	Physiological Measures	Shoot Density												Veerse Meer, southwestern Netherlands	51°32'38.3"N 3°50'39.1"E	51.544	3.84419
Comparison of carbon production and decomposition, benthic nutrient fluxes and denitrification in seagrass, phytoplankton, benthic microalgae- and macroalgae-dominated warm-temperate Australian lagoons	Eyre and Ferguson	2002	2022-11-28	Sarah Joy Bittick	Mesocosm	Manipulative			capricornii		Manly, Curl Curl and Dee Why lagoons		-33.7852	151.292	Nutrients	Sediment			Plant & Environment	Physiological Measures								Sediment Characteristics	Water Column Nutrients	Water Column Dissolved Oxygen	Water Column pH
Comparison of photosynthetic characteristics of the seagrass congeners Zostera marina L. and Zostera japonica Ascher. & Graeb.	Kaldy & Shafer	2014	2022-12-04	Hannnah Lyford	Mesocosm	Manipulative			marina	japonica	Yaquina Bay, Oregon, USA	44.614167 N, 124.028417 W	44.6142	-124.028	Light	Seagrass competition			Plant, Community, & Environment	Physiological Measures	Photosynthetic Output	Shoot Density		Distribution	Organismal Diversity	Seagrass competition		Water Column Turbidity	Water Column Dissolved Oxygen
Comparison of the assemblage functioning of estuary systems dominated by the seagrass Nanozostera noltii versus the invasive drift seaweed Gracilaria vermiculophylla	Cacabelos, Engelen, Mejia, Arenas	2012	2022-12-08	Hannah Lyford	Mesocosm	Manipulative			noltii		Ria de Aveiro, Portugal	40°36′18″N, 8°44′8″W	40.605	-8.73556	Light	Invasion			Plant, Community, & Environment	Physiological Measures	Photosynthetic Output	Growth		Distribution	Chlorophyll A	Macroalgae		Water Column Dissolved Oxygen	Sediment Nutrients	Sediment Characteristics	Water Column Turbidity
Comparison of Zostera marina and maerl community metabolism	Martin et al.	2005	2022-12-01	Sarah Joy Bittick	Field	Manipulative			marina		Bay of Brest		48.3264	-4.39722	Light				Plant, Community, & Environment	Photosynthetic Output	Shoot Density							Water Column Salinity	Water Column Temperature	Water Column Dissolved Oxygen	Water Column pH
Complementary oxygen and nutrient fluxes in seagrass beds and mussel banks?	Asmus et al., 1994	1994	2022-09-24	Hannah Lyford	Field	Survey			marina	noltii	Island of Sylt, Wadden Sea, Denmark	54°54′N 8°20′E	54.9	8.33333	Oxygen	Nutrients			Plant, Community, & Environment	Growth	Shoot Density			Distribution	Organismal Diversity	Seagrass competition		Water Column Nutrients	Water Column Dissolved Oxygen
Complex interactions between autotrophs in shallow marine and freshwater ecosystems: implications for community responses to nutrient stress	Havens et al	2001	2022-10-20	Sarah Joy Bittick			Model		marina		Waquoit Bay		41.5619	-70.5223	Light	Nutrients			Plant, Community, & Environment	Shoot Density				Macroalgae	Epiphytes			Water Column Turbidity						Hog Island Bay, VA		37.4437	-75.7588
Concurrent assesment of eelgrass beds (Zostera marina) and salt marsh communities alng estuarine gradient of the South Slough, Oregon	S. S. Rumrill et al. 2008	2008	2022-06-19	Emma Guerrini Romano	Field	Survey			marina	japonica	South Slough, Coos Bay, Oregon		43.3333	-124.317	Salinity	Temperature			Plant, Community, & Environment	Shoot Density	Growth	Reproductive Output		Macroalgae	Organismal Diversity			Sediment Characteristics	Sediment Nutrients	Water Column Turbidity	Water Column Nutrients					43.3297	-124.319		Valino Island	43.3139	-124.318	Danger Point		43.2828	-124.321
Congener comparison of native (Zostera marine) and introduced (Z. japonica) eelgrass at multiple scales within a Pacific Northwest estuary	J. L. Ruesink et al. 2010	2010	2022-11-22	Emma Guerrini Romano	Field	Survey			marina	japonica	Stackpole, Willapa Bay, Washington, USA		46.5945	-124.028	Seagrass competition				Plant, Community, & Environment	Shoot Density	Growth	Reproductive Output	Shoot Survival	Distribution	Seagrass competition			Sediment Characteristics	Water Column Temperature					Oysterville		46.5945	124.028	Nahcotta		46.4955	124.029
Consumers mitigate heat stress and nutrient enrichment effects on eelgrass Zostera marina communities at its southern range limit	Brodeur et al.	2015	2022-10-20	Sarah Joy Bittick	Mesocosm	Manipulative			marina		Middle Marsh, Back Sound, North Carolina		34.698	-76.597	Nutrients	Temperature			Plant, Community, & Environment	Physiological Measures	Growth			Macroalgae	Invertebrates	Epiphytes		Water Column Temperature				predation
Context dependency in the effect of Ulva-induced loss of seagrass cover on estuarine macrobenthic abundance and biodiversity	Barnes	2019	2022-09-26	Sarah Joy Bittick	Field	Survey			capensis		Knysna steenbok channel, South Africe	34°03′43″S, 23°03′06″E and 34°03′56″S, 23°03′47″	-34.0619	23.0517	Habitat Fragmentation	Oxygen			Plant & Community	Shoot Density				Invertebrates	Organismal Diversity	Distribution
Context-Dependent Eelgrass-Macroalgae Interactions Along an Estuarine Gradient in the Pacific Northwest, USA	Hessing-Lewis	2011	2022-10-17	Sarah Joy Bittick	Field	Manipulative			marina		Coos Bay is located in Southern Oregon (43.35° N, 124.34° W		43.3419	-124.318	Nutrients				Plant, Community, & Environment	Shoot Density	Growth			Macroalgae				Sediment Characteristics	Water Column Nutrients	Water Column Temperature	Water Column Salinity			Valino		43.3145	-124.319	Danger		43.2829	-124.322
Contrasting responses in two populations of Zostera noltii Hornem. to experimental photoperiod manipulation at two salinities	Vermaat et al. 2000	2000	2021-06-18	Devin Ferguson	Mesocosm	Manipulative			noltii		intertidal Zandreek in the SW Netherlands	55°N	55	8.41667	Salinity				Plant	Shoot Density	Growth													a quiet cove Cala Jonquet on the Mediterranean cost of Catalonia, NE Spain	22°N
Copper in the sediment: a major stressor for eelgrass, Zostera marina L.	Nielsen et al.	2017	2022-10-03	Sarah Joy Bittick	Mesocosm	Manipulative			marina		Roskilde Fjord, Denmark	55°54.053 N, 12°2.643 E	55.9009	12.0441	Herbicides	Salinity			Plant & Environment	Growth	Shoot Survival	Photosynthetic Output						Sediment Characteristics				Metals
Coupling of Watersheds and Coastal Wates: Sources and Consequences of Nutrient Enrichment in Waquoit Bay, Massachusetts	Valiela et al. 1992	1992	2022-03-29	Devin Ferguson	Field	Survey			marina		Childs River, Waquoit Bay, Massachusetts		41.5881	-70.5255	Nutrients	Anthropogenic Use	Salinity		Plant & Community	Growth				Chlorophyll A	Macroalgae	Distribution	Invertebrates							Quashet River, Waquoit Bay, Massachusetts		41.6215	-70.5009	Sage Lot Pond, Waquoit Bay, Massachusetts		41.5529	-70.5098
Cover of coastal vegetation as an indicator of eutrophication along environmental gradients	Wikstrom, Carstensen, Blomqvist, & Krause-Jensen	2016	2022-12-27	Hannah Lyford			Model		marina		West Coast, Sweden	57.412452 N, 11.965745 E	57.4125	11.9657	Light	Nutrients	Salinity		Community & Environment					Macroalgae	Organismal Diversity	Chlorophyll A	Distribution	Water Column Turbidity	Water Column Nutrients	Water Column Salinity	Sediment Characteristics			Baltic Proper, Swedish Coastline	58.814329 N, 17.955610 E	58.8143	17.9556	Gulf of Bothnia, Sweden	63.302292 N, 19.230076 E	63.3023	19.2301
Cover versus recovery: Contrasting responses of two indicators in seagrass beds	Soissons, Han, Li, van Katwijk, Ysebaert, Herman, & Bouma	2014	2022-12-11	Hannah Lyford	Field	Manipulative			marina		Swan Lake, Shandong Province, China	N37°20′ 58.2″; E122°34′48.4″	37.3495	122.58	Nutrients	Hydrodynamics	Anthropogenic Use		Plant & Environment	Physiological Measures	Shoot Density	Growth	Shoot Survival					Water Column Nutrients	Sediment Characteristics	Water Column Turbidity	Water Column Temperature			Dongchu Island, Shandong Province, China	N37°02′28.1″; E122°34′11.4″	37.0411	122.57
Current European Labyrinthula zosterae are not virulent and modulate seagrass (Zostera marina) defense gene expression	J. Brakel et al. 2014	2014	2022-12-05	Emma Guerrini Romano	Mesocosm	Manipulative	Field		marina		Slyt, Wadden Sea, Germany		55.041	8.413	Pathogens	Genomics			Plant & Community	Physiological Measures	Growth	Shoot Density		Microbial Diversity										Flensburg Fjord, Germany		54.7557	9.8668	Eckernförde Bay		54.4483	8.7106	Kiel Fjord, Strande, Germany		54.433	10.1699		Falkenstein, Kiel Fjord, Germany		54.3954
Current status and ecological roles of Zostera marina after recovery from large-scale reclamation in the Nakdong River estuary, Korea	Park et al.	2009	2022-09-27	Sarah Joy Bittick	Field	Survey			marina		Nakdong River estuary, Korea		35.0758	128.843	Temperature	Nutrients			Plant & Environment	Shoot Density	Growth	Physiological Measures						Sediment Characteristics	Water Column Nutrients	Water Column Nutrients	Water Column Temperature	ice scouring
Cycling of Mn, Fe, Cu and Zn by Eelgrass Zostera Marina L.	Drifemeyer et al. 1980	1980	2021-10-01	Devin Ferguson	Field	Survey			marina		Eelgrass bed on southeast side of Phillips Island in Newport River estuary	34°43'55"N, 76°41'15"W	34.7319	-76.6875	Nutrients				Plant	Physiological Measures	Growth													Drum Shaols bed approximately in Bogue Sound	34°42'40"N, 76°46'20"W	34.7111	-76.7722	Middle Marsh eelgrass bed in Newport River Estuary	34°41'30"N, 76°37'15"W	34.6917	-76.6208
Decline in eelgrass (Zostera marina L.) in Long Island Sound near Millstone Point, Connecticut (USA) unrelated to thermal input	Keser et al.	2003	2022-09-30	Sarah Joy Bittick	Field	Survey			marina		Jordan Cove, CT		41.3076	-72.1607	Temperature	Nutrients			Plant, Community, & Environment	Shoot Density	Growth	Reproductive Output		Macroalgae				Sediment Characteristics	Water Column Temperature					Porthdinllaen, UK (52°56′N, 4°33′W		52.9333	-4.55	Ria Formosa lagoon, Portugal (36°58′N, 8°02′W; see Figure S1)		36.9667	-8.03333
Decline of Seagrass in Northern Areas of Moreton Bay, Queensland	Kirkman 1978	1978	2021-05-24	Devin Ferguson	Field	Survey			capricornii		Toorbul Point, Moreton Bay, Queensland	27°04'56.8"S, 153°08'02.4"E	-27.0824	153.134	Pathogens	Sediment	Herbivory		Plant & Environment	Growth								Sediment Characteristics
Declines of seagrasses in a tropical harbour, North Queensland, Australia, are not the result of a single event	McKenna, Jarvis, Sankey, Reason, Coles, & Rasheed	2015	2022-11-30	Hannnah Lyford	Field	Survey			mulleri		Townsville, North Queensland, Australia	-19.261507 S, 146.837569 E	-19.2615	146.838	Hydrodynamics	Anthropogenic Use	Nutrients	Light	Plant, Community, & Environment	Growth	Shoot Density	Shoot Survival		Distribution	Organismal Diversity			Water Column Turbidity	Water Column Salinity	Water Column Nutrients	Sediment Characteristics			Abbot Point, North Queensland, Australia	-19.897137 S, 148.087105 E	-19.8971	148.087	Cairns, North Queensland, Australia	-16.807176 S, 145.726600 E	-16.8072	145.727	Mourilyan Harbor, North Queensland, Australia	-17.588373 S, 146.125200 E	-17.5884	146.125	Thursday Island, North Queensland, Australia	-10.584117 S, 142.213200	-10.5841	142.213
Decreasing carbonate load of seagrass leaves with increasing latitude	Mazarrasa et al.	2019	2023-02-06	Sarah Joy Bittick	Field	Survey			marina	muelleri, tasmanica	(27 °S to up to 64 °N) Australia to Greenland		64.1624	-51.5608	Temperature	Carbon			Plant & Environment	Physiological Measures								Water Column pH
delta N-15 and delta C-13 reveal differences in carbon flow through estuarine benthic food webs in response to the relative availability of macroalgae and eelgrass	Olsen et al.	2011	2022-12-06	Sarah Joy Bittick	Field	Survey			marina		Waquoit Bay system, Massachusetts, USA		41.5757	-70.5251	Nutrients				Plant, Community, & Environment	Shoot Density	Physiological Measures			Distribution	Macroalgae	Invertebrates	Organismal Diversity	Sediment Nutrients	Water Column Nutrients
Demography and biomass of the seagrass Zostera marina in a Mexican coastal lagoon	M. Poumian-Tapia et al. 1999	1999	2022-09-10	Emma Guerrini Romano	Field	Survey			marina		San Quintin Bay, Baja California, Mexico		30.4	-115.95	Temperature				Plant, Community, & Environment	Shoot Density	Growth	Reproductive Output	Shoot Survival	Distribution				Water Column Nutrients	Water Column Salinity
DEMOGRAPHY OF SHALLOW EELGRASS (ZOSTERA-MARINA) POPULATIONS - SHOOT DYNAMICS AND BIOMASS DEVELOPMENT	Olsen & Sand-Jensen, 1994	1994	2022-09-05	Hannah Lyford	Field	Survey			marina		Limfjorden, Denmark (Nees Sund)	56.7362° N, 8.4920° E	56.7362	8.492	Light				Plant & Environment	Shoot Density	Growth	Shoot Survival	Reproductive Output					Water Column Turbidity
Denitrification in an intertidal seagrass meadow, a comparison of N-15-isotope and acetylene-block techniques: dissimilatory nitrate reduction to ammonia as a source of N2O?	Welsh et al.	2001	2022-11-02	Sarah Joy Bittick	Mesocosm	Manipulative			noltii		Bay of Arachon	44 40 N 1 10 W	44.6667	-1.16667	Nutrients				Plant & Environment	Growth	Physiological Measures							Water Column Nutrients	Sediment Characteristics
Denitrification, N-fixation and nitrogen and phosphorus fluxes in different benthic habitats and their contribution to the nitrogen and phosphorus budgets of a shallow oligotrophic sub-tropical coastal system	Eyre et al.	2011	2022-09-27	Sarah Joy Bittick	Field	Survey			capricornii		Moreton Bay, South Stradbroke Island		-27.8075	153.407	Nutrients				Community & Environment					Microbial Diversity				Water Column Nutrients	Sediment Nutrients	Water Column pH	Water Column Dissolved Oxygen
Denitrification, nitrogen fixation, community primary productivity and inorganic-N and oxygen fluxes in an intertidal Zostera noltii meadow	Welsh et al.	2000	2022-10-24	Sarah Joy Bittick	Mesocosm	Manipulative			noltii		Bassin d’Arcachon (44° 40’ N, 1° 10’ W).		44.6667	-1.16667	Nutrients	Light			Plant & Environment	Physiological Measures	Growth							Sediment Characteristics	Water Column Nutrients	Water Column Dissolved Oxygen	Sediment Nutrients
Density-dependent effects of an introduced oyster, Crassostrea gigas, on a native intertidal seagrass, Zostera marina	Wagner et al.	2012	2022-09-29	Sarah Joy Bittick	Field	Manipulative			marina		Willapa Bay, WA	46.504° N, 124.008° W	46.0084	-124	Aquaculture Impacts	Invasion	Nutrients		Plant, Community, & Environment	Shoot Density	Growth							Sediment Characteristics	Water Column Nutrients
Dependence of eelgrass (Zostera marina) light requirements on sediment organic matter in Massachusetts coastal bays: Implications for remediation and restoration	Kenworthy, Gallegos, Costello, Field, & di Carlo	2014	2022-12-10	Hannah Lyford	Field	Survey	Model		marina		Lagoon Pond, MA, USA	41.446233 N, 70.591592 W	41.4462	-70.5916	Nutrients	Light	Sediment		Plant, Community, & Environment	Physiological Measures	Shoot Density	Growth	Photosynthetic Output	Distribution				Water Column Nutrients	Sediment Nutrients	Water Column Turbidity	Sediment Characteristics			Nantucket Harbor, MA, USA	41.302869 N, 70.045121 W	41.3029	-70.0451	Cape Pogue Pond, MA, USA	41.403896 N, 70.440093 W	41.4039	-70.4401	Lake Tashmoo, MA, USA	41.463022 N, 70.629555 W	41.463	-70.6296	Green Pond, MA, USA	41.554124 N, 70.569971 W	41.5541	-70.57
Depth Affects Seagrass Restoration Success and Resilience to Marine Heat Wave Disturbance	Aoki, McGlathery, Wiberg, & Al-Haj	2020	2023-01-23	Hannah Lyford	Field	Manipulative		Restoration	marina		Hog Island Bay, VA, USA	37.4138857° N, 75.7225221° W	37.4139	-75.7225	Light	Temperature			Plant, Community, & Environment	Shoot Density	Shoot Survival			Distribution				Water Column Temperature	Water Column Turbidity
Depth colonization of eelgrass (Zostera marina) and macroalgae as determined by water transparency in Danish coastal waters	Borum, Geertz-Hansen, Nielson, & Sand-Jensen, 2002	2002	2022-09-05	Hannah Lyford	Field	Survey			marina		27 Danish Fjords/Coastal Waters out of Roskilde, Denmark	55.6532° N, 12.1408° E	55.6532	12.1408	Light	Nutrients			Community & Environment					Distribution	Macroalgae			Water Column Nutrients	Water Column Turbidity					University of Copenhagen, Denmark	55.6802° N, 12.5724° E	55.6802	12.5724
Depth distributions of Fucus vesiculosus L. and Zostera marina L. as classification parameters for implementing the European Water Framework Directive on the German Baltic coast	Pehlke, Schories, Selig	2009	2022-11-29	Hannnah Lyford	Field	Survey			marina		Kiel Bight, German Baltic Coast	54.52000°N 10.40667°E﻿	54.52	10.4067	Light				Plant & Community	Physiological Measures	Growth	Shoot Density		Macroalgae	Distribution									Arkona Sea, German Baltic Coast	54.1813 N, 12.08722 E	54.1813	12.0872	Mecklenburg Bight, German Baltic Sea	54.333°N 11.667°E﻿	54.333	11.667	Gdansk Bay, Poland	54.5995° N, 19.0852° E	54.5995	19.0852
Description of a Zostera marina catalase gene involved in responses to temperature stress	Zhang et al.	2018	2022-10-11	Sarah Joy Bittick	Mesocosm	Manipulative			marina		Huiquan Bay (36°05′19.4″N, 120°34′46.2″E; Qingdao City, China)		36.0887	120.579	Temperature				Plant	Physiological Measures
Description of the three shallow estuaries: Mondego River (Portugal), Roskilde Fjord (Denmark) and the Lagoon of Venice (Italy)	Flindt et al.	1997	2022-09-26	Sarah Joy Bittick	Field	Survey			noltii	marina	Mondego River (Portugal), Roskilde Fjord (Denmark) and the Lagoon of Venice (Italy)		40.1285	-8.84459	Nutrients	Oxygen	Hydrodynamics	Salinity	Plant, Community, & Environment	Growth				Macroalgae	Invertebrates	Organismal Diversity	Microbial Diversity	Water Column Nutrients	Sediment Characteristics					Roskilde Fjord (Denmark)		55.9239	11.9908	the Lagoon of Venice (Italy)		40.5	12.35
Desiccation is a limiting factor for eelgrass (Zostera marina L.) distribution in the intertidal zone of a northeastern Pacific (USA) estuary	Boese et al.	2005	2022-10-10	Sarah Joy Bittick	Field	Survey			marina		Yaquina Bay, Oregon	site 1	44.6202	-124.04	Light	Temperature			Plant & Environment	Growth	Photosynthetic Output							Water Column Temperature						additional yaquina, mid site		44.6096	-124.021	Yaquina, far site		44.5992	-124.016
Desiccation, Moisture Content and Germination of Zostera marina L. Seed	Pan et al.	2012	2022-11-28	Sarah Joy Bittick	Mesocosm	Manipulative			marina		Sanggou Bay (37◦ 02 N, 122◦ 32 E), Yellow Sea, China		37.0333	122.533	Temperature				Plant	Reproductive Output	Physiological Measures
Detecting the impacts of notorious invaders: experiments versus observations in the invasion of eelgrass meadows by the green seaweed Codium fragile	Drouin et al.	2012	2022-10-04	Sarah Joy Bittick	Field	Manipulative			marina		Old Harry and Grosse-Iˆle bays in Great-Entry Lagoon, ıˆles de la Madeleine, eastern Canada (47370 N, 61310 W,	47370 N, 61310 W	47.6167	-61.5167	Epiphytes	Invasion	Light		Plant, Community, & Environment	Shoot Density	Growth	Physiological Measures		Epiphytes	Macroalgae			Water Column Temperature
Deterioration of eelgrass, Zostera marina L., meadows by water pollution in Seto Inland Sea, Japan	H. Tamaki et al. 2002	2002	2022-09-07	Emma Guerrini Romano	Field	Survey			marina		Ohno, Northern Hioshima Bay, Seto Inland Sea, Japan		34.27	132.26	Anthropogenic Use	Sediment			Plant & Environment	Shoot Survival	Photosynthetic Output							Sediment Characteristics
Determination of the physical drivers of Zostera seagrass distribution using a spatial autoregressive lag model	Ball et al., 2017	2017	2022-09-05	Hannah Lyford	Field	Survey			nigricaulis	mulleri	Port Phillip Bay, Victoria, Australia	38°09' S, 144°52' E	-38.15	144.867	Hydrodynamics	Light	Temperature		Community & Environment					Distribution				Water Column Nutrients	Sediment Nutrients	Water Column Turbidity	Water Column Temperature
Development and validation of a habitat suitability model for the non-indegenous seagrass Zostera japonica in North America	D. J. Shafer et al. 2015	2015	2022-11-27	Emma Guerrini Romano			Model		japonica		Yaquina Bay, Oregon, USA		44.6237	-124.009	Salinity	Light			Community & Environment					Distribution				Water Column Salinity
Development of a nutrient pollution indicator using the seagrass, Zostera marina, along nutrient gradients in three New England estuaries	Lee et al.	2004	2022-10-14	Sarah Joy Bittick	Field	Survey			marina		Great Bay Estuary (New Hampshire; 43◦05_x0005_ N, 70◦50_x0005_ W), Narragansett Bay (Rhode Island; 41◦35_x0005_ N, 71◦20_x0005_ W), and Waquoit Bay (Massachusetts; 41◦35_x0005_ N, 70◦30_x0005_ W)		43.0833	-70.8333	Nutrients				Plant & Community	Physiological Measures	Growth			Epiphytes										Narragansett Bay (Rhode Island; 41◦35 N, 71◦20 W), and		41.5833	-71.3333	Waquoit Bay (Massachusetts; 41◦35 N, 70◦30 W)		41.5833	-70.5
Development of an epiphyte indicator of nutrient enrichment: Threshold values for seagrass epiphyte load	Nelson	2017	2022-12-07	Hannah Lyford			Model		marina		US EPA Newport, OR, USA	44.6227° N, 124.0454° W	44.6227	-124.045	Epiphytes	Light	Nutrients		Plant & Community	Growth	Physiological Measures	Growth	Shoot Density	Distribution	Epiphytes
Development of epiphytic communities on eelgrass (Zostera marina) along a nutrient gradeint in a Danish estuary	Borum 1985	1985	2021-06-21	Devin Ferguson	Field	Survey			marina		shallow estuary, Roskilde Fjord, Denmark	55°48'N 12°03'E	55.8	12.05	Nutrients				Community					Epiphytes	Macroalgae
Development of technique for marine macrophyte bed creation in the coastal zone near power plant-10 method for eelgrass Zostera marina L. bed creation by seedling	Honda M, Kawasaki Y, Yamada S	1988	2022-08-01	Juliette	Mesocosm	Manipulative	Technical Report	Restoration	marina		Odawa Bay, central Japan	35° 15' 27.1" N, 139° 11' 21.5" E	35.2575	139.189	Sediment	Hydrodynamics			Plant	Reproductive Output								Sediment Characteristics	Water Column Turbidity
DEVELOPMENT OF ZOSTERA-MARINA IN THE WHITE SEA IN THE 1ST YEAR OF LIFE	Vekhov et al.	1984	2022-10-03	Sarah Joy Bittick	Mesocosm	Manipulative			marina		The White Sea is a southern inlet of the Barents Sea located on the northwest coast of Russia. It is surrounded by Karelia to the west, the Kola Peninsula to the north, and the Kanin Peninsula to the northeast. The whole of the White Sea is under Russian sovereignty and considered to be part of the internal waters of Russia.. Administratively, it is divided between Arkhangelsk and Murmansk oblast…		65.0607	36.5488	Temperature	Salinity	Hydrodynamics	Light	Plant	Shoot Survival	Growth
Differences in benthic metabolism, nutrient fluxes, and denitrification in Caulerpa taxifolia communities compared to uninvaded bare sediment and seagrass (Zostera capricorni) habitats	Eyre, Maher, Oakes, Erler, Glasby	2011	2022-12-06	Hannah Lyford	Field	Survey			capricorni		South Moreton Bay, Australia	27.6667 S, 153.3833 E	-27.6667	153.383	Oxygen	Invasion	Nutrients		Plant, Community, & Environment	Physiological Measures	Photosynthetic Output			Distribution	Chlorophyll A	Macroalgae		Water Column Dissolved Oxygen	Water Column Nutrients	Sediment Characteristics
Different effects of Caulerpa racemosa on two co-occurring seagrasses in the Mediterranean	Ceccherelli and Campo	2002	2022-09-26	Sarah Joy Bittick	Field	Manipulative			noltii		Antignano	43828'24ºN and 10819'42ºE	43.4733	10.3283	Invasion				Plant	Shoot Density	Reproductive Output
Differential ability of marine and freshwater macrophytes to utilize HCO3- and CO2	Sand-Jensen and Gordon	1984	2022-09-21	Sarah Joy Bittick	Mesocosm	Manipulative			marina		Roskilde Fjord, Denmark		55.8145	12.0591	Acidification				Plant & Community	Photosynthetic Output				Macroalgae	Chlorophyll A			Water Column pH
Differential anaerobic decomposition of seagrass (Zostera noltii) and macroalgal (monostroma obscurum) biomass from Arcachon Bay (France)	S. Bourguès et al. 1996	1996	2022-06-11	Emma Guerrini Romano	Mesocosm	Manipulative			noltii		Arcachon Bay, French Atlantic Coast, France		44.656	-1.14041	Oxygen	Temperature			Plant, Community, & Environment	Growth				Macroalgae	Organismal Diversity			Water Column Nutrients
Differentiation in fitness-related traits in response to elevated temperatures between leading and trailing edge populations of marine macrophytes	Mota et al	2018	2023-01-11	Hannah Lyford	Mesocosm	Manipulative			marina		Kobbefjord near Nuuk, Greenland	64°09'40''N, 51°33'22''W)	64.1611	-51.5561	Temperature	Habitat Fragmentation	Genomics		Plant & Community	Photosynthetic Output	Physiological Measures	Shoot Survival		Distribution	Macroalgae	Organismal Diversity								Ria Formosa lagoon, South Portugal	36°59'51''N, 7°49'41''W	36.9975	-7.82806
DIFFERENTIATION IN HABITAT RESPONSE AMONG POPULATIONS OF NEW WORLD SEAGRASSES	McMillan 1979	1979	2021-06-15	JT	Field	Survey			marina		Izembek Lagoon, Alaska		55.2818	-162.83	Temperature	Light			Plant & Community	Photosynthetic Output	Growth			Chlorophyll A										Puget Sound, WA		47.6928	-122.462	LaJolla, CA		32.8708	-117.255	Beaufort, NC		34.7163	-76.6737	Bodega Bay, CA		38.323	-123.046
Direct and indirect effects of the herbicides Glyphosate, Bentazone and MCPA on eelgrass (Zostera marina)	Dahllof and Nielsen 2007	2007	2021-06-11	James Roe	Mesocosm	Manipulative			marina		Skuldelev beach, Roskilde fjord, Denmark	55°46'57.0"N 12°03'14.2"E	55.7825	12.0539	Herbicides				Plant & Community	Growth	Physiological Measures			Chlorophyll A
Direct effects of current velocity on the growth, morphometry and architecture of seagrasses: a case study on Zostera noltii	Peralta et al. 2006	2006	2021-06-18	Devin Ferguson	Mesocosm	Manipulative			noltii		Oosterschelde, Netherlands	51°33'N 03°57'E	51.55	3.95833	Hydrodynamics				Plant	Growth	Shoot Density
Direct measurements of light attenuation by epiphytes oneelgrass Zostera marina	Mark J. Brush & Scott W. Nixon	2002	2021-06-11	Sadie Kenny	Mesocosm	Manipulative			marina		Lagoon Mesocosm Facility at the University of Rhode Island (USA) and Quonochontaug Pond	41° 20' 22" N, 71° 43' 42" W	41.3394	-71.7283	Epiphytes				Plant	Photosynthetic Output
Dissolved inorganic nitrogen uptake kinetics and delta N-15 of Zostera marina L. (eelgrass) in a coastal lagoon with oyster aquaculture and upwelling influence	Jose Miguel Sandoval-Gil et al. 2015	2015	2022-12-09	Sadie Kenny	Mesocosm	Manipulative			marina		San Quintín Bay (Baja California, México)	30° 30′ N, 116°W	30.5	-116	Nutrients	Aquaculture Impacts	Hydrodynamics		Plant	Physiological Measures	Growth	Shoot Density
Dissolved organic matter uptake in a temperate seagrass ecosystem	Engeland et al	2013	2022-12-08	Hannah Lyford	Mesocosm	Manipulative			noltii		Bay of Cadiz, Spain	36.4101° N, 6.1103° W	34.4101	-6.1103	Nutrients	Microbiome			Plant, Community, & Environment	Physiological Measures				Epiphytes	Microbial Diversity	Chlorophyll A	Macroalgae	Water Column Nutrients	Sediment Characteristics	Sediment Nutrients	Water Column Dissolved Oxygen
Distribution and abundance of submerged aquatic vegetation in Chesapeake Bay: An historical perspective	Orth & Moore, 1984.	1984	2021-11-09	Hannah Lyford	Field	Survey			marina		Chesapeake Bay, VA	37.5214° N, 76.1050° W	37.5214	-76.105	Pathogens	Hydrodynamics	Nutrients	Invasion	Community					Distribution
Distribution and diversity of tunicates utilizing eelgrass as substrate in the western North Atlantic between 39 degrees and 47 degrees north latitude (New Jersey to Newfoundland)	Carman et al.	2016	2023-01-11	Hannah Lyford	Field	Survey			marina		Barnegat Bay, NJ, USA	39.769242, -74.170471	39.7692	-74.1705	Invasion	Invertebrates			Plant & Community	Shoot Density	Physiological Measures			Distribution	Organismal Diversity	Invertebrates								Moriches Bay, NY, USA	40.782070, -72.715356	40.7821	-72.7154	Stonewall Pond, MA, USA	41.326641, -70.757781	41.3266	-70.7578	Farm Pond, MA, USA	41.445455, -70.557701	41.4455	-70.5577	Lagoon Pond, MA, USA	41.445526, -70.592364	41.4455	-70.5924
Distribution and production of macrophytes and phytoplankton in the lagoon of Venice: comparison of actual and past situation	Sfriso & Facca, 2007	2007	2022-10-22	Hannah Lyford	Field	Survey			noltii	marina	Venice Lagoon, Italy	45.3368° N, 12.2750° E	45.3368	12.275	Light	Habitat Fragmentation	Nutrients		Plant & Community	Shoot Density	Photosynthetic Output	Growth		Distribution	Chlorophyll A	Macroalgae
Distribution modeling of seagrasses in brackish waters of Grado-Marano lagoon (Northern Adriatic Sea)	Boscutti et al	2015	2022-12-19	Hannah Lyford			Model		marina	noltii	Lagoon of Grado, Northern Italy	45°40′40"N, 13°03′50"E	45.6778	13.0639	Salinity	Light	Hydrodynamics		Community & Environment					Distribution	Organismal Diversity			Water Column Salinity	Water Column pH	Water Column Turbidity	Water Column Temperature			Lagoon of Marano, Northern Italy	45°46′30"N, 13°27′20"E	45.775	13.4556
Distributions and variation in seasonal biomass of eelgrass Zostera capensis in the Kromme Estuary, St Francis Bay, South Africa	Hanekom & Baird 1988	1938	2021-06-04	Devin Ferguson	Field	Survey			capensis		multiple Zostera beds in the Kromme Estuary, St Francis Bay, South Africa	34°07'S 24°47'E	-34.1167	24.7833	Temperature	Salinity	Nutrients	Sediment	Plant & Environment	Growth	Physiological Measures							Water Column Nutrients	Water Column Temperature	Water Column Salinity
Disturbance by ice and life-history adaptations of the seagrass Zostera marina	Robertson & Mann 1984	1984	2021-06-21	Devin Ferguson	Field	Survey			marina		Chezzetcook Inlet, Nova Scotia, Canada	44°41'N 63°13'W	44.6833	-63.2167	Hydrodynamics				Plant & Community	Growth				Macroalgae								Ice Scouring
Diurnal effects of anoxia on the metabolome of the seagrass Zostera marina	Hasler-Sheetal et al. 2015	2015	2021-11-30	Devin Ferguson	Mesocosm	Manipulative			marina		Svenstrup Strand, Denmark		55.4861	9.75556	Oxygen	Light			Plant	Growth	Physiological Measures	Photosynthetic Output
Diurnal shifts in co-distributions of sulfide and iron(II) and profiles of phosphate and ammonium in the rhizosphere of Zostera capricorni	Pages et al.	2012	2022-12-24	Sarah Joy Bittick	Mesocosm	Manipulative			capricornii		Loders Creek, Queensland, Aus		-27.9618	153.417	Nutrients	Light	Sediment		Plant & Environment	Physiological Measures	Photosynthetic Output							Sediment Nutrients	Sediment Characteristics
Diversity and dispersal interactively affect predictability of ecosystem function	France & Duffy	2006	2022-11-30	Hannnah Lyford	Mesocosm	Manipulative			marina		School of Marine Science and Virginia Institute of Marine Science, College of William and Mary, Gloucester Point, Virginia, USA	37.2710° N, 76.7162° W	37.271	76.7162	Herbivory	Epiphytes	Light		Plant & Community	Growth	Shoot Density			Organismal Diversity	Invertebrates	Chlorophyll A	Macroalgae
Do nutrient availability and plant denisty limit seagrass colonization in the Baltic Sea?	B. Worm et al. 2000	2000	2022-06-20	Emma Guerrini Romano	Field	Manipulative			marina		Friedrichsort, Keil Fjord, western Baltic Sea		54.3833	10.2	Nutrients	Habitat Fragmentation			Plant, Community, & Environment	Growth	Shoot Density			Distribution				Water Column Nutrients	Sediment Nutrients
Dragging the chain: Quantifying continued losses of seagrass from boat moorings	T. M. Glasby et al. 2017	2017	2022-11-27	Emma Guerrini Romano	Field	Survey			mulleri		Port Stephens, New South Whales, Australia		-32.6992	152.159	Anthropogenic Use									Distribution										Lake Macquarie		-33.0907	151.575	Jervis Bay		-35.0539	150.745
Drastic decline of an extensive eelgrass bed in Nova Scotia due to the activity of the invasive green crab (Carcinus maenas)	Garbary et al.	2014	2022-10-11	Sarah Joy Bittick	Field	Manipulative			marina		Benoit Cove, Gulf of Saint Lawrence	Benoit Cove (45°37.92′N; 61°37.67′W	45.632	-61.6278	Invasion				Plant & Community	Shoot Density	Growth	Shoot Survival		Invertebrates	Distribution
Drivers of sulfide intrusion in Zostera muelleri in a moderately affected estuary in south-eastern Australia	Marianne Homer et al. 2017	2017	2022-10-14	Sadie Kenny	Field	Survey			mulleri		Wallis Lake estuary, Australia		-32.2577	152.475	Anthropogenic Use	Nutrients			Plant & Environment	Shoot Density	Growth	Physiological Measures						Sediment Characteristics	Sediment Nutrients	Water Column Nutrients
Duration of temperature exposure controls growth of Zostera japonica: Implications for zonation and colonization	James E. Kaldy et al. 2015	2015	2022-05-18	Sadie Kenny	Mesocosm	Manipulative			japonica		Sally's Bend of Yaquina Bay, central Oregon, USA		44.627	-124.013	Temperature				Plant & Environment	Growth								Water Column Nutrients
Dynamic changes in seagrass assemblages under eutrophication and implications for recovery	P. G. Cardoso et al. 2004	2004	2022-10-06	Emma Guerrini Romano	Field	Survey			noltii		Mondego Estuary, Portugal		40.1333	-8.83333	Nutrients				Plant, Community, & Environment		Growth			Invertebrates	Distribution	Organismal Diversity		Sediment Characteristics	Sediment Nutrients
Dynamic simulation of littoral zone habitats in lower Chesapeake Bay. I. Ecosystem characterization related to model development	Buzzelli	1998	2022-10-18	Sarah Joy Bittick	Field	Survey			marina		Goodwin Islands (located within the Chesapeake Bay National Estuarine Research Reserve in VIrginia, CBNERR-VA)	(37°12'46"N, 76°23'46''W	37.2128	-76.3961	Nutrients	Sediment	Temperature	Salinity	Plant, Community, & Environment	Shoot Density	Physiological Measures	Growth		Chlorophyll A	Epiphytes	Distribution		Sediment Characteristics	Sediment Nutrients	Water Column Nutrients	Water Column Temperature
Dynamic simulation of littoral zone habitats in lower Chesapeake Bay. II. Seagrass habitat primary production and water quality relationships	Buzzelli et al.	1998	2022-10-18	Sarah Joy Bittick			Model		marina		The Goodwin Islands National Estuarine Research Reserve (NERR) site is situated at the York River mouth in lower Chesapeake Bay (37°12'46"N, 76°23'46''W;		37.2128	-76.3961	Nutrients	Light	Hydrodynamics	Temperature	Plant, Community, & Environment	Growth	Photosynthetic Output			Chlorophyll A	Epiphytes	Invertebrates	Distribution	Water Column Nutrients	Sediment Characteristics
Dynamics of benthic vegetation standing-stock, irradiance, and water properties in central Puget Sound	Thom & Albright, 1990	1990	2022-02-21	Hannah Lyford	Field	Survey			marina		Puget Sound, WA, USA	47.7237° N, 122.4713° W	47.7237	-122.471	Nutrients	Light	Anthropogenic Use		Plant, Community, & Environment	Shoot Density				Chlorophyll A	Macroalgae			Water Column Temperature	Water Column Dissolved Oxygen	Water Column Salinity	Water Column Nutrients
Dynamics of epiphyton on eelgrass (Zostera marina L.) leaves: Relative roles of algal growth, herbivory, and substratum turnover	Borum, 1987	1987	2022-02-21	Hannah Lyford	Field	Survey			marina		Roskilde Fjord, Denmark	55.8102° N, 12.0592° E	55.8102	12.0692	Epiphytes	Herbivory			Plant & Community	Growth	Shoot Survival	Photosynthetic Output		Invertebrates	Epiphytes
Dynamics of seagrass bed microbial communities in artificial Chattonella blooms: A laboratory microcosm study	Inaba et al.	2019	2023-02-06	Sarah Joy Bittick	Mesocosm	Manipulative			marina		Genji Bay (Stn. 1), Kakui Island, Okayama Prefecture, the Seto Inland Sea, Japan		34.7115	134.285	Microbiome	Pathogens			Plant, Community, & Environment	Physiological Measures				Microbial Diversity	Chlorophyll A			Water Column Nutrients	Water Column Salinity	Water Column Temperature	Water Column Dissolved Oxygen
Dynamics of Seagrass Meadows on the Swedish Skagerrak Coast	Nyqvist, A., André, C., Gullström, M., Baden, S. P., & Åberg, P	2009	2022-11-23	Hannah Lyford	Field	Survey			marina		Swedish Skagerrak Coast, Sweden	(57'47'41.2"N, 11'43'49.5"E)	57.7948	11.7304	Anthropogenic Use	Habitat Fragmentation			Community & Environment					Distribution				Water Column Nutrients	Sediment Characteristics
Ecological Characteristics of the Epiphytes on Seagrass - II. Effects of Physico-chemical Factoras on Eelgrass (Zostera marina L.) and Epiphytes	Chung & Youn 2021	2021	2021-06-24	Devin Ferguson	Field	Survey			marina		Yeosu Bay on the southern coast of Korea near Yulim-ri	34°36'N 127°47'E	34.6	127.783	Salinity	Nutrients	Temperature		Plant, Community, & Environment	Growth				Epiphytes				Water Column Nutrients	Water Column Salinity
Ecological characteristics of Zostera japonica population in Swan Lake of Rongcheng, Shandong Province of China	Zhang et al.	2013	2022-12-06	Sarah Joy Bittick	Field	Survey			japonica		Swan Lake	(37毅21忆 N,122毅34忆 E),	37.35	122.567	Sediment	Temperature			Plant & Environment	Growth	Physiological Measures	Shoot Density						Sediment Characteristics	Sediment Nutrients	Water Column Temperature
Ecological dynamics of Zostera marina (eelgrass) in three adjacent bays in Atlantic Canada	Wong et al. 2013	2013	2021-11-21	Devin Ferguson	Field	Survey			marina		Kejimkujik National Park Seaside, Nova Scotia, Canada		43.8596	-64.8269	Temperature	Nutrients	Salinity	Light	Plant & Community	Growth	Shoot Density			Macroalgae										Port l'Herbert, Nova Scotia, Canada		43.8019	-63.9321	Port Joli, Nova Scotia, Canada		43.8776	-64.9003
Ecological study of three lagoons of Amvrakikos Raivisar site, Greece	Christia & Papastergiadou, 2005	2005	2022-11-14	Hannah Lyford	Field	Survey			noltii		Tsoukalio Lagoon, Amvrakikos gulf, Greece	38.9561° N, 21.0222° E	38.9561	21.0222	Light	Nutrients	Salinity	Temperature	Plant, Community, & Environment	Shoot Density	Growth	Physiological Measures		Organismal Diversity	Distribution			Water Column Nutrients	Water Column Turbidity	Water Column Salinity	Water Column Temperature	anthropogenic use		Rodia Lagoon, Greece	39.09437°N, 20.80651°E	39.0944	20.8065
Ecological typologies of large areas. An application in the Mediterranean Sea	de la Hoz et al.	2018	2023-01-16	Sarah Joy Bittick			Model		marina	noltei	Meditarrean Sea		34.5417	19.7226	Salinity	Temperature	Light	Hydrodynamics	Community & Environment					Distribution				Water Column Temperature	Water Column Salinity
Ecosystem change in a South African marine reserve (1960–2009): role of seagrass loss and anthropogenic disturbance	Pillay, Branch, Griffiths, Williams, & Prinsloo	2010	2022-11-26	Hannnah Lyford	Field	Survey			capensis		Langebaan Lagoon, South Africa	33° 11’ 27” S, 18° 07’ 37” E	-33.1908	18.1269	Anthropogenic Use	Aquaculture Impacts	Nutrients		Plant, Community, & Environment	Growth	Shoot Density			Distribution	Organismal Diversity	Invertebrates	Epiphytes	Water Column Nutrients
Ecosystem Engineering by Seagrasses Interacts with Grazing to Shape an Intertidal Landscape	van der Heide et al.	2012	2022-12-13	Sarah Joy Bittick	Field	Manipulative			noltii		Emmapolder, The Netherlands (53u 289 0 N, 6u 459 0 E)		53.4667	6.75	Sediment	Herbivory			Plant & Community	Shoot Density				Distribution	Organismal Diversity
Ecosystem engineering creates a new path to resilience in plants with contrasting growth strategies	Soissons et al.	2019	2023-02-05	Sarah Joy Bittick	Field	Manipulative			marina	japonica	“Yuehu lagoon” or “Swan Lake” (N37° 20′48.6″; E122° 34′10.9″)		37.3468	122.57	Habitat Fragmentation	Nutrients			Plant, Community, & Environment	Shoot Density	Growth			Seagrass competition				Sediment Characteristics	Sediment Nutrients
Edaphic resource foraging by Zostera marina (Linnaeus) patches	Furman et al. 2017	2017	2021-06-17	James Roe	Field	Manipulative			marina		Shinnecock Bay, Long Island, New York, USA	40.857237° N, 72.450289° W	40.8572	-72.4503	Nutrients				Plant	Physiological Measures	Reproductive Output
Eelgrass (Zostera marina) Food Web Structure in Different Environmental Settings	Thormar et al.	2016	2022-12-05	Sarah Joy Bittick	Field	Survey			marina		n (Dalby Bugt, hereafter DB, 55°310 07@ N, 10°370 05@ E) and an enclosed (Kertinge Nor, hereafter KN, 55°260 52@ N, 10°330 30@ E)		55.5186	10.6181	Nutrients	Hydrodynamics	Light		Plant, Community, & Environment	Shoot Density	Growth	Physiological Measures		Chlorophyll A	Organismal Diversity	Macroalgae		Water Column Temperature	Water Column Nutrients	Water Column Turbidity	Sediment Characteristics
Eelgrass (Zostera marina) tolerance to anoxia	Pulido & Borum 2010	2010	2021-11-12	Devin Ferguson	Mesocosm	Manipulative			marina		Roskilde Fjord, Denmark		55.9581	11.9603	Oxygen	Temperature			Plant	Growth	Photosynthetic Output
Eelgrass Bed Structure, Leaf Nutrient, and Leaf Isotope Responses to Natural and Anthropogenic Gradients in Estuaries of the Southern Gulf of St. Lawrence, Canada	Hitchcock, Courtenay, Coffin, Pater, & van den Heuvel	2017	2022-12-29	Hannah Lyford	Field	Survey			marina		Kouchibouguac, New Brunswick, Canada	46.831660, -64.932407	46.8317	-64.9324	Anthropogenic Use	Nutrients	Oxygen	Salinity	Plant, Community, & Environment	Shoot Density	Growth	Physiological Measures		Distribution	Invertebrates			Water Column Salinity	Water Column Nutrients	Sediment Characteristics	Water Column Dissolved Oxygen			Bouctouche, New Brunswick, Canada	46.473056, -64.714696	46.4731	-64.7147	Wheatley River, Prince Edward Island, Canada	46.389030, -63.270793	46.389	-63.2708	Bideford, Prince Edward Island, Canada	46.606840, -63.902580	46.6068	-63.9026
Eelgrass fairy rings: sulfide as inhibiting agent	Borum et al.	2014	2022-10-13	Sarah Joy Bittick	Field	Survey			marina		Island of Møn, Denmark (54°57′46′′N, 12°33′12′′E)		54.9628	12.5533	Sediment				Plant & Environment	Physiological Measures	Shoot Density	Growth	Photosynthetic Output					Sediment Characteristics	Sediment Nutrients			sulfur
Eelgrass Genetic Diversity Influences Resilience to Stresses Associated with Eutrophication	Plaisted et al.	2020	2022-10-14	Sarah Joy Bittick	Mesocosm	Manipulative			marina		Nannies Island (NI) 43° 04.136’ N	70° 51.737’ W	43.0689	-70.8623	Light	Sediment	Genomics		Plant & Environment	Physiological Measures	Shoot Density	Shoot Survival	Growth					Water Column Salinity	Water Column Dissolved Oxygen	Water Column pH	Water Column Temperature			Southway (Sw)	41° 38.064’ N 69° 58.014’ W	41.6344	-69.9669	West Falmouth (WF)	41° 36.454’ N 70° 38.836’ W	41.6076	-70.6473	West Island (WI)	41° 35.053’ N 70° 49.280’ W	41.5842	-70.8213	N. Prudence Island (NPI)	41° 0.64582’ N 71° 35.276’ W	41.0108	-71.5879
Eelgrass meadows, Zostera marina (L.), facilitate the ecosystem service of nitrogen removal during simulated nutrient pulses in Shinnecock Bay, New York, USA	Zarnoch, Hoellein, Furman, & Peterson	2017	2022-12-27	Hannah Lyford	Mesocosm	Manipulative			marina		Cormorant Point, Shinnecock Bay, New York, USA	40.873465 N, 72.490126 W	40.8735	-72.4901	Nutrients	Sediment	Oxygen		Plant & Community	Physiological Measures	Photosynthetic Output	Shoot Density						Sediment Characteristics	Sediment Nutrients	Water Column Dissolved Oxygen				Tiana Bay, Shinnecock Bay, New York, USA	40.856987 N, 72.535841 W	40.857	-72.5358	Tiana Beach, Shinnecock Bay, New York, USA	40.826159 N, 72.531786 W	40.8262	-72.5318
Eelgrass recovery after nutrient enrichment reversal	Vaudrey et al.	2010	2022-10-10	Sarah Joy Bittick	Field	Survey			marina		Mumford Cove, CT	(N41◦19.472_x0004_ , W72◦01.117_x0004_ )	41.3245	-72.0186	Nutrients				Plant, Community, & Environment	Growth				Macroalgae	Seagrass competition			Water Column Nutrients	Sediment Characteristics	Water Column Temperature	Water Column Salinity
Eelgrass re-establishment in shallow estuaries is affected by driftig macroalgae - Evaluated by agent-based modeling	Paula Canal-Vergés et al.	2013	2022-11-02	Mehana Muranaka	Mesocosm	Manipulative			marina		Odense Fjord, Denmark		55.4908	10.5278	Hydrodynamics	Light	Sediment		Plant & Community	Growth	Shoot Survival			Macroalgae
Eelgrass restoration by seed maintains genetic diversity: case study from a coastal bay system	McGlathery, Orth, Reynolds, Waycott, & Zieman	2012	2022-12-01	Hannnah Lyford	Field	Manipulative		Restoration	marina		York River, Chesapeake Bay, VA, USA	37° 14' 31.20" N, 76° 22' 34.19" W	37.242	-76.3762	Genomics				Plant	Reproductive Output	Physiological Measures	Shoot Density	Shoot Survival											Hungar's Creek, VA, USA	37.442650, -75.930193	37.4427	-75.9302	Mobjack Creek, VA, USA	37.282314 N, -76.350895 W	37.282314,	-76.3509	Fisherman Island, VA, USA	37.096480 N, -75.959850 W	37.0965	-75.9599	South Bay, VA, USA	37.223628 N, -75.873770 W	37.2236	-75.8738
Eelgrass seed harvesting: Flowering shoots development and restoration on the Swedish west coast	Infantes & Moksnes	2018	2022-12-27	Hannah Lyford	Field	Survey		Restoration	marina		Lindholm, Sweden	58.265589 N, 11.504488 E	58.2656	11.5045	Habitat Fragmentation	Light	Temperature		Plant, Community, & Environment	Physiological Measures	Reproductive Output	Shoot Density	Growth	Distribution				Water Column Turbidity	Water Column Temperature					Gaso, Sweden	58.232717 N, 11.408723 E	58.2327	11.4087	Wallhamn, Sweden	58.010560 N, 11.702776 E	58.0106	11.7028	Viks Kile, Sweden	58.049584 N, 11.566653 E	58.0496	11.5667
Eelgrass structural complexity mediates mesograzer herbivory on epiphytic algae	E. P. Voigt et al. 2019	2019	2022-05-26	Emma Guerrini Romano	Mesocosm	Manipulative			marina		Shelter Island, San Diego Bay, CA, USA		32.7	-117.217	Herbivory	Invertebrates			Plant & Community	Shoot Density	Physiological Measures	Growth		Epiphytes
Eelgrass Zostera marina in subarctic Greenland: dense meadows with slow biomass turnover in cold waters	Christensen, Bondo, Krause-Jensen, Marba, & Olesen	2015	2022-12-09	Hannah Lyford	Field	Survey			marina		Kobbefjord, Godthåbsfjord system, Greenland	64°09’N, 51°33’W	64.15	-51.55		Temperature			Plant, Community, & Environment	Physiological Measures	Shoot Density	Growth		Distribution				Water Column Temperature						Qugssuk, Godthåbsfjord system, Greenland	64°45’N, 51°05’W	64.75	-51.0833	Ameralik, Godthåbsfjord system, Greenland	64°15’N, 51°35’W	64.25	-51.5833	Kapisillit, Godthåbsfjord system, Greenland	64°28’N, 50°13’W	64.4667	-50.2167
Eelgrass Zostera marina loss in temperate estuaries: relationship to land-derived nitrogen loads and effect of light limitation imposed by algae	Hauxwell et al. 2003	2003	2021-06-18	James Roe	Field	Survey			marina		Waquoit Bay, Massachusetts, USA	41°33'44.4"N 70°31'29.2"W	41.5623	-70.5248	Light	Nutrients			Plant & Community	Shoot Density	Growth				Macroalgae	Chlorophyll A	Epiphytes
Eelgrass Zostera marina populations in northern Norwegian fjords are genetically isolated and diverse	Olsen, Coyer, Stam, Moy, Christie, & Jorgensen	2013	2022-12-07	Hannah Lyford	Field	Survey		Management	marina		Sagfjord, Norway	68° 51.93’ N, 17° 49.85’ E	68.8655	17.8308	Genomics	Habitat Fragmentation			Plant & Community	Physiological Measures	Shoot Density	Reproductive Output		Distribution	Organismal Diversity									Sor Lenangen, Norway	69° 47.42’ N, 19° 59.39’ E	69.7903	19.9898	Balsfjord, Norway	69° 29.54’ N, 18° 53.47’ E	69.4923	18.8912	Sorkjosen, Norway	69° 13.76’ N, 19° 16.13’ E	69.2293	19.2688
Eelgrass, Zostera marina, growth along depth gradients: upper boundaries of the variation as a powerful predictive tool	Krause-Jensen et al. 2000	2000	2021-06-18	Devin Ferguson	Field	Survey			marina		Oresund between Denmark and Sweden	55°46'N 12°44'E	55.7667	12.7333	Light				Plant & Community	Shoot Density	Growth			Distribution
Effect of increased sediment sulfide concentrations on the composition of stable sulfur isotopes (δ34S) and sulfur accumulation in the seagrasses Zostera marina and Posidonia oceanica	Frederiksen et al. 2008	2008	2021-06-17	James Roe	Mesocosm	Manipulative			marina		Fyn, Denmark	55°23'31.8"N 9°49'16.9"E	55.3922	9.82136	Toxins				Plant & Environment	Physiological Measures	Growth							Sediment Characteristics
Effect of light intensity on survival, growth, and photosynthetic pigment of young seedlings of eelgrass Zostera marina Linnaeus, 1753 (Alismatales: Zosteraceae)	Pei-Dong Zhang et al. 2014	2014	2022-06-20	Sadie Kenny	Mesocosm	Manipulative			marina		Lidao Bay, located in Shandong Province, China	37.2182°– 37.2256°N, 122.5990°–122.6080°E	37.2182	122.599	Light				Plant	Growth	Physiological Meaures
Effect of Nutrient Enrichment on Growth of the Eelgrass Zostera marina in the Chesapeake Bay, Virginia, USA	Orth 1977	1977	2021-05-20	Devin Ferguson	Field	Manipulative			marina		Chesapeake Bay off Church Neck on the Delmarva Peninsula, Virginia, USA	37°26'N 75°57'W	37.4333	-75.95	Nutrients				Plant	Growth
Effect of oyster mariculture on submerged aquatic vegetation: an experimental test in a Pacific Northwest estuary	Everett et al. 1995	1995	2021-06-08	James Roe	Field	Manipulative			marina		South Slough estuary, southern arm of the larger Coos Bay estuarine syste, Oregon, USA	43"20'15"N. 124"19'30" W.	43.3375	-124.325	Aquaculture Impacts				Plant, Community, & Environment	Growth	Reproductive Output			Distribution	Macroalgae			Sediment Characteristics
Effect of plant photosynthesis, carbon sources and ammonium availability on nitrogen fixation rates in the rhizosphere of Zostera noltii	Welsh et al. 1997	1997	2021-06-08	James Roe	Mesocosm	Manipulative			noltii		Ile aux Oisea, Bassin d'Arcacho, France	44°41'36.9"N 1°10'42.4"W	44.6936	-1.17844	Nutrients	Light	Carbon		Plant	Physiological Measures
Effect of reduced irradiance on 13C uptake, gene expression and protein activity of the seagrass Zostera muelleri	Mikael Kim et al.	2019	2022-11-23	Mehana Muranaka	Mesocosm	Manipulative			mulleri		pittwater australia		-33.6306	151.3	Light				Plant	Photosynthetic Output
EFFECT OF REDUCED LIGHT ON DENSITY AND GROWTH OF THE SEAGRASS HETEROZOSTERA-TASMANICA IN WESTERN PORT VICTORIA AUSTRALIA	Bulthuis 1981	1981	2021-06-07	James Roe	Field	Manipulative			tasmanica		Western Port and Port Phillip Bay, Victoria, Australia	38°10'54.2"S 144°43'45.6"E	-38.1817	144.729	Light				Plant	Growth
Effect of shading of Zostera marina (eelgrass) on sulfur cycling in sediments with contrasting organic matter and sulfide pools	Holmer and Laursen 2002	2002	2021-06-10	James Roe	Mesocosm	Manipulative			marina		around the island of Fyn, Denmark	55°32'29.7"N 9°57'57.1"E	55.5416	9.96586	Light				Plant & Environment	Growth	Physiological Measures	Shoot Density						Sediment Nutrients	Sediment Characteristics
Effect of spatio-temporal shifts in salinity combined with other environmental variables on the ecological processes provided by Zostera noltei meadows	Sousa et al. 2017	2017	2021-06-09	James Roe	Field	Survey			noltii		Ria de Aveiro,western coast of Portugal	40°38°N, 8°44°W	40.6333	-8.73333	Salinity				Plant & Environment	Growth	Physiological Measures	Photosynthetic Output						Sediment Characteristics	Sediment Nutrients
Effect of storms on photosynthesis, carbohydrate content and survival of eelgrass populations from a coastal lagoon and the adjacent open ocean	Cabello-Pasini et al. 2002	2002	2021-06-25	James Roe	Field	Survey			marina		Estero de Punta Banda and Bahia Todos Santos, Baja California, Mexico	31°45′N, 116°40′W	31.75	-116.667	Hydrodynamics				Plant & Environment	Shoot Density	Physiological Measures	Photosynthetic Output						Water Column Temperature				Shoot Mortality
Effect of temperature and nutrient manipulations on eelgrass Zostera marina L. from the Pacific Northwest, USA	Kaldy 2014	2014	2021-06-10	James Roe	Mesocosm	Manipulative			marina		Yaquina Bay, Newport, OR, USA	44°37'53.3"N 124°02'47.3"W	44.6315	-124.046	Nutrients	Temperature			Plant	Growth	Physiological Measures
Effect of the seagrass Zostera capricornii on sediment microbial processes	JW Hanson et al. 2000	2000	2022-06-27	Carolina Salcedo	Mesocosm	Manipulative			capricornii		The intertidal part of a monotypic Z. capricorni meadow near Victoria Point on the western shore of Moreton Bay, Queensland Australia		-27.5792	153.313		Sediment			Plant	Growth	Shoot Density	Photosynthetic Output
Effect of trampling and digging from shellfishing on Zostera noltei (Zosteraceae) intertidal seagrass beds	Garmendia et al. 2017	2017	2021-06-22	James Roe	Field	Manipulative			noltii		Oka estuary, south- eastern Bay of Biscay, Spain	43°23'27.3"N 2°41'28.4"W	43.3909	-2.69122	Aquaculture Impacts				Plant	Shoot Density
Effect on marine sediment nitrogen fluxes caused by organic matter enrichment with varying organic carbon structure and nitrogen content	Dahllof and Karle	2005	2022-11-30	Sarah Joy Bittick	Mesocosm	Manipulative			marina		Gullmar Fjord on the Swedish West coast (58816V, 5, 11829V, 4)		58.2681	11.4844	Nutrients	Sediment			Plant, Community, & Environment	Physiological Measures				Microbial Diversity				Sediment Nutrients	Sediment Characteristics
Effect of oyster aquaculture on seagrass Zostera marina at the estuarine landscape scale inWillapa Bay, Washington (USA)	Brett R. Dumbauld & Lee M. McCoy 2015	2015	2022-10-08	Sadie Kenny	Field	Survey			marina		Willapa Bay estuary, Washington	46° N, 124° W	46	-124	Aquaculture Impacts				Community					Distribution
Effect of shading by Ulva rigida canopies on growth andcarbon balance of the seagrass Zostera noltii	Fernando G. Brun et al. 2003	2003	2021-06-15	Sadie Kenny	Mesocosm	Manipulative	Field		noltii		Intertidal muddy beds at Los Torunos, Cadiz Bay Natural Park	36° 30' N, 6° 10' W	36.5	-6.16667	Light				Plant & Environment	Growth	Shoot Density	Physiological Meaures						Water Column Nutrients
Effects of a simulated heat wave on photophysiology and gene expression of high- and low-latitude populations of Zostera marina	Gidon Winters et al. 2001	2001	2021-06-17	Sadie Kenny	Mesocosm	Manipulative			marina		Doverodde, Limfjord, Denmark	56° 43.070' N, 8° 28.446' E	56.7178	8.4741	Temperature				Plant	Photosynthetic Output	Genomics/Gene Expression											Genomics/Gene Expression		Ebeltoft, Baltic Sea, Denmark	56° 12.499' N, 10° 34.647' E	56.2083	10.6108	Gabicce Mare, Adriatic Sea, Italy	43° 57.967' N, 12° 45.859' E	43.9661	12.7643
Effects of adaptation to elevated salinity on some enzymes' salt-tolerance in vitro and physiological changes of eelgrass	Ye and Zhao	2002	2022-10-04	Sarah Joy Bittick	Mesocosm	Manipulative			marina		Changdao Island		39.3058	121.683	Salinity				Plant	Physiological Measures	Photosynthetic Output
Effects of aerobic versus anoxic conditions on glutamine synthetase activity in eelgrass (Zostera marina L.) roots: regulation of ammonium assimilation potential	Pregnall 2004	2004	2021-06-09	James Roe	Mesocosm	Manipulative			marina		Great Harbor, Woods Hole, MA, USA	41°31'41.6"N 70°40'59.4"W	41.5282	-70.6832	Oxygen				Plant	Physiological Measures
Effects of atrazine on the physiology, sexual reproduction, and metabolism of eelgrass	Y Gao et al 2019	2019	2022-09-30	Carolina Salcedo	Mesocosm	Manipulative			marina		Chudao Island (low tide), Shadong, China	122° 34' 04" N 37° 02' 32" E	37.0422	122.568	Herbicides				Plant	Physiological Measures	Reproductive Output
Effects of burial and erosion on the seagrass Zostera noltii	Susana Cabaço, Rui Santos	2006	2022-10-20	Mehana Muranaka	Mesocosm	Manipulative			noltii		Ria Formosa Lagoon, southern Portugal		37.019	-8.00293	Sediment				Plant	Shoot Density	Growth	Physiological Measures	Shoot Survival
Effects of clam harvesting on sexual reproduction of the seagrass Zostera noltii	Alexandre et al. 2005	2005	2021-06-02	Devin Ferguson	Field	Manipulative			noltii		Ria Formosa lagoon, Portugal	36°58′N 8°02′W	38.9667	-8.03333	Aquaculture Impacts				Plant	Growth	Reproductive Output	Shoot Density
Effects of CO2 enrichment on photosynthesis, growth, and nitrogen metabolism of the seagrass Zostera noltii	Alexandre et al. 2012	2012	2021-06-09	James Roe	Mesocosm	Manipulative			noltii		Ria Formosa coastal lagoon, South Portugal	37°00′N, 7°58′ W	37	-7.96667	Carbon				Plant & Environment	Physiological Measures	Growth							Water Column Nutrients
Effects of coexistence between the blue mussel and eelgrass on sediment biogeochemistry and plant performance	Vinther et al. 2012	2012	2021-06-08	James Roe	Field	Survey			marina		Flensborg fjord, Denmark	54°51'11.6"N 9°39'27.1"E	54.8532	9.65753	Invertebrates				Plant, Community, & Environment	Reproductive Output	Physiological Measures			Epiphytes				Sediment Characteristics	Sediment Nutrients
Effects of copper enrichment on survival, growth and photosynthetic pigment of seedlings and young plants of the eelgrass Zostera marina	Jian-Sheng Zhao et al. 2016	2016	2022-10-09	Sadie Kenny	Mesocosm	Manipulative			marina		Swan Lake on the eastern coast of Shandong Peninsula, China		37.3382	122.555	Nutrients				Plant	Growth	Shoot Density	Photosynthetic Output
Effects of Current on Photosynthesis and Distribution of Seagrass	Fonseca and Kenworthy 1987	1987	2021-10-01	Devin Ferguson	Field	Survey	Review		marina		Shackleford Shoal, Beaufort, North Carolina (PartII)		34.686	-76.6532	Hydrodynamics				Plant & Community	Growth	Photosynthetic Output	Physiological Measures		Distribution				Water Column Nutrients	Water Column Temperature
Effects of Detrital Subsidies on Soft-Sediment Ecosystem Function Are Transient and Source-Dependent	Gladstone-Gallagher, Lohrer, Lundquist, & Pilditch	2016	2022-12-27	Hannah Lyford	Field	Manipulative			mulleri		Whangapoua Estuary, North Island, New Zealand	S 36° 44' 19.3", E 175° 39' 02.8'	-36.7387	175.651	Nutrients	Oxygen	Sediment		Plant, Community, & Environment	Physiological Measures	Photosynthetic Output	Shoot Density		Organismal Diversity	Macroalgae	Chlorophyll A		Water Column Nutrients	Sediment Nutrients	Sediment Characteristics	Water Column Dissolved Oxygen
Effects of different treatments on seed germination and seedling establishment of eelgrass Zostera marina L.	Tian et al.	2014	2022-12-06	Sarah Joy Bittick	Mesocosm	Manipulative			marina		Qingdao, China		36.0551	120.381	Salinity	Temperature			Plant	Reproductive Output	Shoot Survival	Growth
Effects of dredging disturbance on seagrass coverage, sediment composition and infaunal assemblages within a SW England Zostera marina bed.	Rachel Cole 2016	2016	2022-11-13	Sadie Kenny	Field	Survey			marina		Fishcombe Cove in Torbay, SW England	50° 24’10” N, 003° 31’20” W	50.4028	-3.52222	Anthropogenic Use				Plant, Community, & Environment	Shoot Density	Growth			Epiphytes	Organismal Diversity			Sediment Characteristics	Sediment Nutrients
Effects of edge/interior and patch structure on reproduction in Zostera marina L. in Chesapeake Bay, USA	Harwell and Rhode	2007	2022-10-18	Sarah Joy Bittick	Field	Manipulative			marina		James River (368 58.20 N, 768 24.60 W		36.97	-76.41	Habitat Fragmentation				Plant	Reproductive Output	Shoot Density													York River (378 130 N, 768 300 W		37.2167	-76.5
Effects of epiphyte load on optical properties and photosynthetic potential of the seagrasses Thalassia testudinum Banks ex Konig and Zostera marina L.	Drake et al.	2003	2022-10-05	Sarah Joy Bittick	Field	Survey			marina		Elkhorn Slough, California(36848.99N, 121846.29W)		36.815	-121.103	Epiphytes	Light	Nutrients		Plant & Community	Photosynthetic Output	Growth			Epiphytes
Effects of Epiphytic Load on the Photosynthetic Performance of a Seagrass, Zostera marina, Monitored In Vivo by Chlorophyll Fluorescence Imaging	Oh et al. 2009	2009	2022-01-28	Devin Ferguson	Field	Survey			marina		sublittoral zone of Daguri, Jindong Bay, Korea		35.1049	128.529	Epiphytes				Plant & Community	Photosynthetic Output				Epiphytes	Chlorophyll A
Effects of filamentous algal mats on sulfide invasion in eelgrass (Zostera marina)	M Holmer and RM Nielson	2007	2022-11-04	Carolina Salcedo	Mesocosm	Manipulative			marina		Sandy Sediment at the Western Part of Flyn, Denmark	55° 22' 22.3248'' N 10° 17' 14.3628'' E	55.3729	10.287323	Invasion				Plant & Environment	Physiological Measures								Water Column Nutrients
Effects of filamentous macroalgae mats on growth and survival of eelgrass, Zostera marina, seedlings	Rasmussen et al. 2012	2012	2021-06-17	James Roe	Mesocosm	Manipulative			marina		Aarhus Bay, Denmark	56.2° N, 10.3° E	56.2	10.3	Light				Plant, Community, & Environment	Growth				Macroalgae				Water Column Dissolved Oxygen				Shoot Mortality
Effects of habitat fragmentation on Zostera marina seed distribution	Livernois et al. 2017	2017	2021-06-09	James Roe	Field	Survey			marina		Back Sound, North Carolina, USA	34°39'46.2"N 76°33'39.3"W	34.6628	-76.5609	Habitat Fragmentation				Plant & Community	Reproductive Output	Shoot Density			Seagrass competition
Effects of in situ light reduction on density and growth of the seagrass heterozostera tasmanica	Bulthuis 1983	1983	2021-06-03	Devin Ferguson	Field	Manipulative			tasmanica		Port Phillip Bay, Victoria, Australia	38°07'0"S 144°21'40"E	-38.1167	144.361	Light				Plant	Growth														Wester Port, Victoria, Australia	38°16'45"S 145°13'20"E	-38.2792	145.222	Western Port, Victoria, Australia	38°16'45"S 145°14'15"E	-38.2792	145.238	Port Phillip Bay, Victoria, Australia	38°06'45"S 144°35'10"E	-38.1125	144.586	Port Phillip Bay, Victoria, Australia	38°11'35"S 144°44'20"E	-38.1931	144.739
Effects of light and biomass partitioning on growth, photosynthesis and carbohydrate content of the seagrass Zostera noltii Hornem	Olive et al. 2007	2007	2021-06-11	James Roe	Mesocosm	Manipulative			noltii		El Bajo de la Cabezuela, Cádiz, Spain	36° 32′ N, 6° 15′ W	36.5333	-6.25	Light				Plant	Growth	Photosynthetic Output	Physiological Measures										also investigated effect of biomass partitioning
Effects of light availability on growth, architecture and nutrient content of the seagrass Zostera noltii Hornem.	G. Peralta et al. 2002	2002	2021-06-11	Sadie Kenny	Mesocosm	Manipulative			noltii		Low intertidalmono specific bed, Rio San Pedro Inlet, Cadiz Bay Natural Park, Spain	36° 30' N, 6° 10' W	36.5	-6.16667	Light				Plant	Growth	Shoot Density	Physiological Meaures	Photosynthetic Output
Effects of light on seagrass photosynthesis, growth and depth distribution	Dennison 1987	1987	2021-06-04	Devin Ferguson	Field	Survey			marina		eelgrass meadow in Great Harbor, Woods Hole, Massachusetts	40°31.5'N 70°40.5'W	40.525	-70.675	Light				Plant & Environment	Photosynthetic Output	Growth							Water Column Temperature
Effects of local anthropogenic stressors on a habitat cascade in an estuarine seagrass system	Siciliano et al. 2019	2019	2021-06-07	Devin Ferguson	Field	Manipulative			mulleri		Avon-Heathcoate Estuary, New Zealand	43°33'11.7"S 172°44'39.4"E	-43.5532	172.744	Anthropogenic Use	Sediment	Nutrients		Plant, Community, & Environment	Growth	Shoot Density			Invertebrates				Sediment Nutrients
Effects of locally varying exposure, sediment type and low-tide water cover on Zostera marina recruitment from seed	Katwijk and Wijgergangs	2004	2022-09-26	Sarah Joy Bittick	Field	Manipulative			marina		Balgzand in the Dutch Wadden Sea	528550N, 48150E	52.9167	4.25	Hydrodynamics	Sediment			Plant, Community, & Environment	Shoot Density	Shoot Survival			Invertebrates	Macroalgae			Water Column pH	Water Column Nutrients	Sediment Characteristics
Effects of microtopographic variation and macroalgal cover on morphometries and survival of the annual form of eelgrass (Zostera marina)	WG Nelson and G Sullivan	2018	2022-10-14	Carolina Salcedo	Field	Survey			marina		Idaho Flat adjacent to the Hatfield Marine Science Center in Yaquinea Bay, Newport, OR, USA	44° 37' 12" N 124° 2' 13.2" W	44.62	-124.037	Invertebrates				Plant & Community	Growth				Macroalgae
Effects of Nitrogen Availability and Herbivory on Eelgrass (Zostera-marina) and Epiphytes	Williams and Ruckelshaus 1993	1993	2021-06-30	Caroline Thorpe	Mesocosm	Manipulative			marina		Intertidal portion of Padilla Bay National Estuarine Research Reserve, North Puget Sound, Washington, USA	48° 29' 37.48" N, 122° 28' 38.597" W	48.4937	-122.477	Nutrients	Herbivory			Plant & Community	Growth	Shoot Density			Epiphytes
Effects of nutrient additions on intertidal seagrass (Zostera muelleri) habitat in Western Port, Victoria, Australia	Morris 2007	2007	2021-06-07	James Roe	Field	Manipulative			mulleri		Blind Bight in Western Port, Victoria, Australia	38°22'03.0"S 145°13'13.2"E.	-38.3675	145.22	Nutrients				Plant, Community, & Environment	Physiological Measures	Growth	Shoot Density		Chlorophyll A	Macroalgae	Epiphytes	Organismal Diversity	Water Column Nutrients						Crib Point in Western Port, Victoria, Australia	38°20'04.2"S 145°12'49.8"E.	-38.3344	145.214	Hastings, in Western Port, Victoria, Australia	38°14'02.2"S 145°21'16.0"E	-38.2339	145.354
Effects of ocean acidification and hydrodynamic conditions on carbon metabolism and dissolved organic carbon (DOC) fluxes in seagrass populations	Egea et al. 2018	2018	2021-06-10	James Roe	Mesocosm	Manipulative			noltii		Oosterschelde estuary, Viane, southwestern part of the Netherlands	51 ̊39N, 4 ̊01E	51.65	4.01667	Acidification				Plant & Environment	Physiological Measures	Photosynthetic Output	Growth						Water Column Temperature
Effects of Oyster Depuration Gear on Eelgrass (Zostera marina L.) in a Low Density Aquaculture Site in Long Island Sound	Vaudrey et al. 2009	2009	2021-06-07	James Roe	Field	Manipulative			marina		South of the mouth of the Mystic River, CT, U.S.A.	N41°18.658'W71°59.208'	41.311	-71.9868	Aquaculture Impacts				Plant, Community, & Environment	Growth	Physiological Measures	Shoot Density		Chlorophyll A				Sediment Characteristics	Water Column Turbidity
Effects of point source of untreated sewage waters on seagrass (Zostera marina and Z-noltii) beds in the South-Western Black Sea	Marianne Holmer et al. 2016	2016	2022-06-15	Sadie Kenny	Field	Survey			marina	noltii	Sozopol Bay, Burgas, SW Black Sea coast	27.680° E, 42.515° N	42.515	27.68	Nutrients	Light			Plant, Community, & Environment	Physiological Meaures	Shoot Density	Growth		Distribution	Epiphytes			Sediment Nutrients	Water Column Nutrients	Sediment Characteristics
Effects of red macroalgal (Gracilariopsis sp.) abundance on eelgrass Zostera marina in Tomales Bay, California, USA	Brittany E. Huntington & Katharyn E. Boyer 2008	2008	2022-05-28	Sadie Kenny	Field	Manipulative			marina		Tomales Bay, California USA		38.1648	-122.906	Light	Nutrients			Plant	Shoot Density	Growth
Effects of salinity and nutrient load and their interaction on Zostera marina	van Katwijk et al. 1999	1999	2021-06-10	Caroline Thorpe	Mesocosm	Manipulative			marina		Terschelling, Dutch Wadden sea	53° 20' 2.06" N, 5° 21' 5.367" E	53.3339	5.35149	Salinity	Nutrients			Plant & Environment	Growth	Physiological Measures							Sediment Nutrients	Water Column Nutrients
Effects of salinity and temperature on seed germination and seedling T establishment in the endangered seagrass Zostera japonica Asch. & Graebn. in northern China	Shidong Yue et al. 2019	2019	2022-06-03	Sadie Kenny	Mesocosm	Manipulative			japonica		Swan Lake, Rongcheng City, Shandong Province	37°35′N, 122°57′E	37.5833	122.95	Salinity	Temperature			Plant	Growth
Effects of salinity and water temperature on the ecological performance of Zostera marina	Nejrup et al. 2008	2008	2021-06-09	James Roe	Mesocosm	Manipulative			marina		Seden Strand, Odense Fjord, Denmark	55°26'20.8"N 10°26'43.4"E	55.4391	10.4454	Salinity	Temperature			Plant	Growth	Photosynthetic Output	Shoot Density										Shoot Mortality
Effects of seasonal dynamics in a Zostera noltii meadow on phosphorus and iron cycles in a tidal mudflat (Arcachon Bay, France)	Deborde et al.	2008	2022-12-06	Sarah Joy Bittick	Field	Manipulative			noltii		Arcachon Bay	(44° 40’ N, 1° 10’ W).	44.6667	-1.16667	Sediment	Nutrients			Plant, Community, & Environment	Growth				Organismal Diversity				Sediment Nutrients	Sediment Characteristics	Water Column Nutrients		metals
Effects of sediment nutrients on seagrasses - literature-review and mesocosm experiment	Frederick T. Short 1986	1986	2021-06-16	Sadie Kenny	Mesocosm	Manipulative			marina		Great Bay Estuary	43° 03' 59" N, 70° 51' 40" W	43.0664	-70.8611	Nutrients				Plant & Environment	Growth	Shoot Density	Physiological Meaures						Sediment Nutrients	Water Column Nutrients
Effects of sediment nutrients on the growth and abundance of seagrasses	Frederick T. Short 1987	1987	2021-06-04	Sadie Kenny	Mesocosm	Manipulative			marina		Subtidal areas from Great Bay Estuary	43° 03' 59" N, 70° 51' 40" W	43.0664	-70.8611	Nutrients				Plant & Environment	Shoot Density	Growth	Physiological Meaures						Sediment Nutrients	Sediment Characteristics	Water Column Nutrients	sediment pH
Effects of sediment organic content and hydrodynamic conditions on the growth and distribution of Zostera marina	Wicks et al. 2009	2009	2022-01-21	Devin Ferguson	Mesocosm	Manipulative			marina		Mill's Island, Chincoteague Bay, Maryland, USA		38.0449	-75.3398	Sediment				Plant & Environment	Growth								Sediment Characteristics	Sediment Nutrients
Effects of Seed Source, Sediment Type, and Burial Depth on Mixed-Annual and Perennial Zostera marina L. Seed Germination and Seedling Establishment	Jarvis & Moore	2015	2022-11-26	Hannnah Lyford	Field	Manipulative		Restoration	marina		Phillips Island, Newport River, NC, USA	34° 43′ N, 76° 41′ W	34.7167	-76.6833	Sediment	Light			Plant, Community, & Environment	Reproductive Output	Growth	Shoot Density		Distribution				Water Column Salinity	Sediment Characteristics	Sediment Nutrients				Back Sound, NC, USA	34° 66′ N, 76° 52′ W	34.1	-76.8667	Lower York River, Chesapeake Bay, VA	37° 15′ N; 76° 25′ W	37.25	-76.4167	Goodwin Island, VA, USA	37° 13′ N; 76° 23′ W	37.2167	-76.4167
Effects of simulated green turtle regrazing on seagrass abundance, growth and nutritional status in Moreton Bay, south-east Queensland, Australia	Kuiper-Linley et al 2007	2007	2021-06-22	Devin Ferguson	Field	Manipulative			capricornii		Wanga Wallen Bank, North Strabroke Island, Moreton Bay, south-east Queensland	27°25'S 153°26'E	-27.4167	153.433	Herbivory				Plant	Growth
Effects of sulfide concentration, pH, and anoxia on photosynthesis and respiration of Zostera marina	Korhonen et al. 2012	2012	2021-10-06	James Roe	Mesocosm	Manipulative			marina		San Quintín Bay	30°30' N, 116°01' W	30.5	-116.017	Oxygen	Toxins	Acidification		Plant	Photosynthetic Output
Effects of temperature and nitrate on phosphomonoesterase activities between carbon source and sink tissues in Zostera marina L.	BW Touchette and JM Burkholder	2007	2022-10-22	Carolina Salcedo	Mesocosm	Manipulative			marina		Middle Marsh, Beaufort, North Carolina, USA	34° 41' 37.5828" N 76° 36' 28.7352" W	34.6938	-76.608	Temperature	Nutrients			Plant	Physiological Measures
Effects of temperature on photosynthesis and respiration in eelgrass (zostera-marina l)	James A. Marsh Jr. et al. 1986	1986	2021-06-03	Sadie Kenny	Mesocosm	Manipulative			marina		Great Harbor, Woods Hole, MA	40° 31.5' N, 70° 40.5' W	40.525	-70.675	Temperature				Plant	Photosynthetic Output	Physiological Meaures
Effects of temperature, salinity and seed age on induction of Zostera japonica germination in North America, USA	James E. Kaldy et al. 2015	2015	2022-06-02	Sadie Kenny	Mesocosm	Manipulative			japonica		Yaquina Bay, Oregon, USA		44.627	-124.013	Temperature	Salinity			Plant	Growth
Effects of the green macroalga Enteromorpha intestinalis on macrobenthic and seagrass assemblages in a shallow coastal estuary	S. P. Cummins et al. 2004	2004	2022-06-08	Sadie Kenny	Field	Manipulative			capricornii		Tuggerah Lakes estuary on the central coast of New South Wales, Australia		-33.3199	151.453	Nutrients	Light			Plant & Community	Growth				Invertebrates	Organismal Diversity
EFFECTS OF THE HERBICIDE ATRAZINE ON ADENINE NUCLEOTIDE LEVELS IN ZOSTERA MARINA L. (EELGRASS)	DELISTRATY and HERSHNER 1984	1984	2021-06-08	James Roe	Mesocosm	Manipulative			marina		Chesapeake Bay		37.3443	-76.3841	Herbicides				Plant & Environment	Physiological Measures	Photosynthetic Output	Growth						Water Column Temperature	Water Column Salinity
Effects of the invasive, nonindigenous seagrass Zostera japonica on nutrient fluxes between the water column and benthos in a NE Pacific estuary	Larned	2003	2022-11-21	Hannah Lyford	Field	Manipulative			japonica	marina	Yaquina Bay, Oregon, USA	44.6°N, 124.0°W	44.6	-124	Invasion	Seagrass competition	Nutrients		Plant, Community, & Environment	Physiological Measures	Growth	Shoot Density		Distribution	Seagrass competition	Chlorophyll A		Water Column Nutrients	Water Column Temperature	Sediment Nutrients	Water Column Dissolved Oxygen
Effects of tidal inundation on benthic macrofauna associated with the eelgrass Zostera muelleri	Nicastro and Bishop	2013	2022-10-05	Sarah Joy Bittick	Field	Manipulative			mulleri		Careel Bay, Pittwater estuary (33° 37′ 06″ S, 151° 19′ 36″ E)		-33.6183	151.327	Hydrodynamics				Plant, Community, & Environment	Growth				Invertebrates	Organismal Diversity			Sediment Characteristics				SLR		Pretty Beach, Brisbane Waters (33° 31′ 36″ S, 151° 20′ 42″ E)		-33.5267	151.345	Budgewoi Lake, Tuggerah Lakes (33°12′ 28″ S, 151° 35′ 9″ E)		-33.21	151.586
Effects of ultraviolet and photosynthetically active radiation on five seagrass species	Dawson & Dennison, 1996	1996	2022-05-30	Hannah Lyford	Mesocosm	Manipulative			capricorni		Stradbroke Island, Moreton Bay, Australia (Dunwich Harbor)	153° 24'E, 27° 24'S	-27.4	153.4	Light				Plant	Physiological Measures	Photosynthetic Output													27°23'52.44" S, 153°26'20.76" E		-27.3979	153.439
Effects of ulvoid (Ulva spp.) accumulation on the structure and function of eelgrass (Zostera marina L.) bed	Sugimoto et al. 2007	2007	2021-06-09	James Roe	Mesocosm	Manipulative			marina		Iwakuni, the Seto Inland Sea, Japan	34°13'49.5"N 132°16'53.9"E	34.2304	132.282	Light				Plant	Reproductive Output	Growth	Shoot Density	Physiological Measures									Shoot Mortality
Effects of upwelling, tides and biological processes on the inorganic carbon system of a coastal lagoon in Baja California	Ribas-Ribas et al.	2011	2022-10-19	Sarah Joy Bittick	Field	Survey			marina		San Quitin Bay, Multiple sites	30°27′N, 116°00′W	30.45	-116	Carbon	Hydrodynamics	Temperature	Oxygen	Community & Environment					Chlorophyll A				Sediment Characteristics	Water Column Salinity	Water Column pH	Water Column Dissolved Oxygen
Effects of UV Radion on photosynthesis of Zostera chilensis from two locations of northern Chile	Sandoval et. al 2015	2015	2022-06-23	Carolina Salcedo	Mesocosm	Manipulative			chilensis		Puerto Aldea: Located 58km south of Coquimbo, the 5th region and Bahia Salado: Located 90km south of Copiapo, the 3rd region of chile.	30°17,524’S; 71°36,482’W: Located 58km south of Coquimbo, the 5th region.	-30.2921	-71.608	Light				Plant	Photosynthetic Output														Bahía Salado	27°40,039'S; 70°57,344'W)	-27.6674	-70.9557
Effects of Zostera marina on the patterns of spatial distribution of sediments and macrozoobenthos in the boreal lagoon of Furen (Hokkaido, Japan)	Magni, Como, Kamijo, & Montani	2017	2023-01-16	Hannah Lyford	Field	Survey			marina		Outer Furen Lagoon, Hoikkaido, Japan	43.353544, 145.259724	43.3535	145.26	Sediment	Habitat Fragmentation	Nutrients	Invertebrates	Community & Environment					Invertebrates	Organismal Diversity	Distribution	Chlorophyll A	Sediment Characteristics	Sediment Nutrients	Water Column Salinity	Water Column Temperature			Mid Furen Lagoon, Hoikkaido, Japan	43.338554, 145.258696	43.3386	145.259	Inner Furen Lagoon, Hoikkaido, Japan	43.306575, 145.246000	43.3066	145.246
Effects of invasive colonial tunicates and a native spongeon the growth, survival, and light attenuation of eelgrass(Zostera marina)	Melisa C. Wong & Benedikte Vercaemer 2012	2012	2021-06-19	Sadie Kenny	Field	Survey			marina		Port l'Hebert, south shore Nova Scotia, Canada	43.86805° N, 64.96280° W	43.868	-64.9628	Invasion				Plant	Growth	Shoot Density	Photosynthetic Output	Physiological Meaures									Light attenuation of PAR through eelgrass blades
Effects of shading on growth, biomass and population maintenanceof the intertidal seagrass zostera-noltii hornem in the dutchwadden sea	Catharina J.M. Philippart 1994	1994	2021-06-16	Sadie Kenny	Field	Manipulative			noltii		Tidal flats off the island of Terschelling in the Dutch Wadden Sea	53° 23' 25'" N, 5° 22' 00" W	53.3903	5.36667	Light				Plant	Growth
Elevated Turbidity and the Nutrient Removal Capacity of Seagrass	Bulmer et al.	2018	2022-10-20	Sarah Joy Bittick	Field	Manipulative			mulleri		Kaipara Harbour, New Zealand: Mairetahi Creek (Mai C; -36.5477S, 174.3609E)		-36.5477	174.361	Light	Habitat Fragmentation			Plant, Community, & Environment	Growth	Physiological Measures			Invertebrates				Sediment Characteristics	Water Column Nutrients	Water Column Turbidity	Water Column Dissolved Oxygen			Kakaraia Flats (KKF; 36.4188S, 174.3937E)		-36.4188	174.394	Tapora Bank (TPB; -36.3938S; 174.2930E)		-36.3938	174.293
Elevated ammonium concentrations and low light form a dangerous synergy foreelgrass Zostera marina	Beatriz Villazan et al. 2013	2013	2021-06-21	Sadie Kenny	Mesocosm	Manipulative			marina		Isefjorden, Denmark	55° 37' 08" N, 11° 38' 14" E	55.6189	11.6372	Light	Nutrients			Plant & Environment	Physiological Meaures	Growth	Shoot Density	Photosynthetic Output					Water Column Dissolved Oxygen
Empirical relationship between eelgrass extent and predicted watershed-derived nitrogen loading for shallow New England estuaries	J. S. Latimer et al. 2010	2010	2022-11-27	Emma Guerrini Romano	Field	Survey			marina		Narragansett Bay, Rhode Island		41.5672	-71.3554	Nutrients				Community					Distribution				Water Column Nutrients						Buzzards Bay		41.6124	-70.8939	Greenwich Bay		41.6737	-71.403
Environment, dosage, and pathogen isolate moderate virulence in eelgrass wasting disease	Dawkins et al.	2018	2022-10-04	Sarah Joy Bittick	Mesocosm	Manipulative			marina		Shaw Island and Friday Harbor Labs		48.57	-122.92	Light	Temperature	Pathogens		Plant	Physiological Measures														Collin's Cove	48° 32’ 60’’ N, 123° 0’ 36’’ W	48.55	-123.01
Environmental drivers of sediment carbon storage in temperate seagrass meadows	Lima et al	2019	2023-02-06	Sarah Joy Bittick	Field	Survey			marina	angustifolia, noltii	Solent region, in southern England.		50.7983	-0.996667	Carbon	Sediment			Plant & Environment	Shoot Density								Sediment Characteristics	Sediment Nutrients	Water Column Salinity	Water Column pH
Environmental Factors Affecting Recent Summertime Eelgrass Diebacks in the Lower Chesapeake Bay: Implications for Long-term Persistence	Jarvis, Moore	2008	2022-11-29	Hannnah Lyford	Field	Survey			marina		Goodwin Island, Lower Chesapeake Bay, Virginia	37°13.6' N, 76°28.7' W	37.2267	-76.4783	Light	Oxygen	Temperature		Plant, Community, & Environment	Physiological Measures	Shoot Density	Growth		Chlorophyll A	Distribution			Water Column Nutrients	Water Column Dissolved Oxygen	Water Column Temperature	Water Column Turbidity			The Gloucester Point, Virginia, USA	37°15' N, 76°30' W	37.25	-76.5
Environmental Factors and the Wasting Disease of Eelgrass	Stevens 1939	1939	2021-10-29	Devin Ferguson	Field	Survey			marina		Eastport, Maine		44.9063	-66.9902	Salinity	Light			Plant	Growth														Boston, Massachussetts		42.3616	-71.0552	New Haven, Connecticut		41.3073	-72.9109	Wilmington, North Carolina		34.2104	-77.8848
Environmental factors controlling biomass development of seagrass T meadows of Zostera noltei after a drastic decline (Arcachon Bay, France)	Cognat et al. 2018	2018	2021-06-21	James Roe	Field	Survey			noltii		Arcachon Bay South French Atlantic Coast	44°40′ N, 1°10′ W	44.6667	-1.16667	Light	Hydrodynamics	Sediment	Nutrients	Plant	Shoot Density	Physiological Measures	Growth						Water Column Temperature
Environmental regulation of seed germination in Zostera marina L. (eelgrass) in Chesapeake Bay: effects of light, oxygen and sediment burial	Moore et al. 1993	1993	2022-03-29	Devin Ferguson	Mesocosm	Manipulative			marina		mouth of York River, Chesapeake Bay, VA, USA		37.2667	-76.3333	Light	Nutrients	Sediment	Temperature	Plant
Environmental Variability and Macrophyte Assemblages in Coastal Lagoon Types of Western Greece (Mediterranean Sea)	Christia, Giodani, & Papastergiadou	2018	2023-01-01	Hannah Lyford	Field	Survey			noltii		Rodia Lagoon, Greece	38.212049, 22.162968	38.212	22.163	Salinity	Nutrients	Seagrass competition	Light	Community & Environment					Organismal Diversity	Chlorophyll A	Seagrass competition	Macroalgae	Water Column Nutrients	Water Column Salinity	Water Column Dissolved Oxygen	Sediment Characteristics			Tsoukalio, Greece	38.952270, 21.042950	38.9523	21.043	Klisova Lagoon, Greece	38.360405, 21.430027	38.3604	21.43
Epifaunal community composition and nutrient addition alter sediment organic matter composition in a natural eelgrass Zostera marina bed: a field experiment	Spivak et al.	2009	2022-10-22	Sarah Joy Bittick	Field	Manipulative			marina		Goodwin Islands, an archipelago in the York River estuary, Virginia, USA.		37.2151	-76.4	Nutrients	Herbivory			Plant, Community, & Environment	Growth	Physiological Measures			Epiphytes	Chlorophyll A	Invertebrates		Sediment Characteristics	Sediment Nutrients	Water Column Nutrients		predation
Epiphyte load and seagrass performance are decoupled in an estuary with low eutrophication risk	J. L. Ruesink 2016	2016	2022-06-23	Emma Guerrini Romano	Field	Manipulative			marina		Willapa Bay, Washington, USA		46.475	-124.022	Light	Temperature	Invertebrates	Nutrients	Plant & Community	Growth	Physiological Measures			Epiphytes	Organismal Diversity	Chlorophyll A
Epiphyte-cover on seagrass (Zostera marina L.) leaves impedes plant performance and radial O2 loss from the below-ground tissue	Brodersen et al. 2015	2015	2021-06-22	James Roe	Mesocosm	Manipulative			marina		Aggersund, Limfjorden, Denmark	56°59'54.5"N 9°16'53.9"E	56.9985	9.28164	Light	Epiphytes			Plant & Environment	Physiological Measures								Water Column Dissolved Oxygen	Sediment Characteristics
Epiphyte-grazer interactions on zostera marina (anthophyta: monocotyledones): effects of density on community function	TA Nelson	1998	2022-06-20	Carolina Salcedo	Mesocosm	Manipulative			marina		Subtidal grass meadows of the Pacific Northwest Coast of the United States (San Juan Island, Washington, USA): Brown Island and Turn Cove	Turn Cove: 48°32’ N, 122°58’W	48.5333	-122.967	Epiphytes	Herbivory			Plant & Community	Photosynthetic Output				Epiphytes										Brown Island, Washington, USA	48°32’N, 122°59’W	48.5333	-122.983	Argyle Lagoon		48.52	-123.046
Estimation of a whole plant Q10 to assess seagrass productivity during temperature shifts	Rasmusson et al.	2019	2022-10-26	Sarah Joy Bittick	Mesocosm	Manipulative			marina		Kristineberg, Fiskebäckskil	58°14′57.40″N, 11°26′48.99″E	58.2493	11.4347	Temperature				Plant	Physiological Measures	Photosynthetic Output
Estimation of light requirement for growth of Zostera japonica cultured seedlings based on photosynthetic properties	Mahiko Abe et al. 2010	2010	2021-06-22	Sadie Kenny	Mesocosm	Manipulative			japonica		Tategami-ura, Ago Bay, Mie Prefecture, Japan	34° 17' 08" N, 136° 48' 06" E	34.2856	136.802	Temperature	Light			Plant & Environment	Photosynthetic Output	Growth	Shoot Density						Water Column Dissolved Oxygen
Estimation of light requirement for the growth of Zostera marina in central Japan	Mahiko Abe et al. 2003	2003	2021-06-22	Sadie Kenny	Mesocosm	Manipulative			marina		Matsunase, Ise Bay, Mie Prefecture, central Japan	34° 44' 28" N, 136° 42' 52" E	34.7411	136.714	Light	Temperature			Plant & Environment	Photosynthetic Output								Water Column Dissolved Oxygen
Eutrophication and trophic structure in response to the presence of the eelgrass Zostera noltii	Baeta et al., 2009	2009	2022-05-30	Hannah Lyford	Field	Survey			noltii		Mondego Estuary, Portugal	40°07'N 08°49'W	40.1167	-8.81667	Nutrients				Plant, Community, & Environment	Physiological Measures				Organismal Diversity	Chlorophyll A	Distribution		Water Column Nutrients	Sediment Characteristics	Sediment Nutrients
Eutrophication of Cape Cod estuaries: Effect of decadal changes in global-driven atmospheric and local-scale wastewater nutrient loads	Valiela, Owens, Elmstrom, & Lloret	2016	2023-01-14	Hannah Lyford	Field	Survey	Model		marina		Childs River, Cape Cod, MA, USA	41.598482, -70.525177	41.5985	-70.5252	Nutrients	Anthropogenic Use	Light		Plant, Community, & Environment	Shoot Density	Shoot Survival	Growth		Distribution	Macroalgae			Water Column Turbidity	Water Column Nutrients					Quashnet River, Cape Cod, MA, USA	41.578350, -70.514547	41.5784	-70.5145	Sage Lot Pond, Cape Cod, MA, USA	41.552837, -70.509231	41.5528	-70.5092
Eutrophication overrides warming as a stressor for a temperate African seagrass (Zostera capensis)	Mvungi and Pillay 2019	2019	2021-06-15	James Roe	Mesocosm	Manipulative			capensis		Langebaan Lagoon on the West coast of South Africa	33 ̊ 11’ 27” S, 18 ̊ 07’ 37”E	-33.1908	18.1269	Temperature	Nutrients			Plant & Community	Growth	Photosynthetic Output	Physiological Measures	Epiphytes									Shoot Mortality
Eutrophication, phase shift, the delay and the potential return in the Greifswalder Bodden, Baltic Sea	Munkes 2005	2005	2021-11-15	Devin Ferguson	Field	Survey			marina		Greifswalder Bodden, southern coast of Baltic Sea, Germany		54.2229	13.5468	Nutrients	Light			Plant, Community, & Environment	Growth				Macroalgae				Water Column Nutrients	Water Column Temperature
Eutrophication, water management, and the functioning of Dutch estuaries and coastal lagoons	Nienhaus, 1992	1992	2021-11-09	Hannah Lyford	Field	Survey			marina		Grevelingen Estuary, Netherlands	51.708497166 N 4.01999992 E	51.7085	4.02	Herbivory	Nutrients			Plant, Community, & Environment	Shoot Density				Distribution				Water Column Nutrients
Eutrophication-driven shifts in primary producers in shallow costal systems: implications for system functional change	J. Cebrian et al. 2014	2014	2022-05-23	Emma Guerrini Romano	Field	Survey			marina		Southwest Cape Cod, Massachussets, USA	Site 1 (PP)	41.5671	-70.5851	Nutrients	Light	Oxygen		Plant, Community, & Environment	Growth				Macroalgae	Distribution			Water Column Nutrients	Water Column Turbidity							41.5538	-70.5403	Site 3 (CR)		41.5781	-70.5314	Site 4 (QR)		41.5765	-70.5155	Site 5 (MR)		41.6076	-70.4743
Evaluating Patterns of Nitrogen Supply Using Macroalgal Tissue Content and Stable Isotopic Signatures in Tomales Bay, CA	Boyer & Huntington	2008	2022-11-29	Hannnah Lyford	Field	Manipulative			marina		Tomales Bay, California, USA	38.1713° N, 122.9128° W	38.1713	-122.913	Light	Nutrients			Plant, Community, & Environment	Growth	Shoot Density	Physiological Measures		Macroalgae				Water Column Nutrients	Water Column Turbidity
Evaluation of eelgrass bed nitrogen cycle using an ecosystem model	Hata and Nakata	1998	2022-10-18	Sarah Joy Bittick	Field	Survey			marina		Lake Notoro		44.0572	144.152	Nutrients				Plant, Community, & Environment	Shoot Density	Photosynthetic Output			Epiphytes	Invertebrates	Microbial Diversity	Macroalgae	Water Column Nutrients	Water Column Dissolved Oxygen	Water Column Temperature
Evaluation of environmental conditions in three coastal lagoons of the Amvrakikos Gulf (Ionian Sea).	Christia and Papastergiadou	2005	2022-11-29	Sarah Joy Bittick	Field	Survey	Technical Report		noltii		Amvrakikos, Greece		39.0627	20.814	Nutrients	Temperature	Salinity	Oxygen	Environment									Water Column Nutrients	Water Column pH	Water Column Dissolved Oxygen	Water Column Temperature
Evaluation of four seagrass species as early warning indicators for nitrogen overloading: Implications for eutrophic evaluation and ecosystem management	Yang et al.	2018	2023-01-16	Sarah Joy Bittick	Field	Survey			marina	japonica	Samples were collected in three areas on the easternmost coast of Jiaodong Peninsula, Shangdong Province, China: Swan Lake (37°20′- 37°22′ N, 122°33′-122°35′ E), Sanggou Bay (37°00′-37°08′ N, 122°26′- 122°36′ E), and Rongcheng Bay (37°08′-37°20′ N, 122°32′-122°37′ E)		37.341	122.58	Nutrients				Plant & Environment	Physiological Measures	Photosynthetic Output	Growth						Water Column Nutrients	Sediment Nutrients	Water Column Dissolved Oxygen	Water Column pH
Evaluation of Genetic Diversity in Zostera japonica (Aschers. et Graebn.) for Seagrass Conservation in Brackish Lower Reaches of the Hii River System, Japan	Hodoki, Ohbayashi, Tanaka & Kunii	2013	2022-11-30	Hannnah Lyford	Field	Survey		Management	japonica	marina	Lake Shinji, Japan	35.4427° N, 132.9514° E	35.4427	132.951	Anthropogenic Use	Herbicides	Genomics	Hydrodynamics	Plant, Community, & Environment	Physiological Measures	Reproductive Output			Distribution	Organismal Diversity			Water Column Nutrients	Water Column Turbidity					Lake Nakaumi, Japan
Evaluation of the utility of water quality based indicators of estuarine lagoon condition in NSW, Australia	Coade, Doherty, Hill, Scanes, 2007	2007	2022-11-14	Hannah Lyford	Field	Survey			capricorni		Burril Lake, New South Wales, Australia	35.3889° S, 150.4441° E	-35.3889	150.444	Nutrients	Light			Plant, Community, & Environment	Physiological Measures	Shoot Density			Distribution	Macroalgae	Chlorophyll A		Water Column Nutrients	Water Column Turbidity	Water Column Dissolved Oxygen	Water Column Salinity			Coila Lake, New South Wales, Australia	36.0244° S, 150.1272° E	-36.0244	150.127	Conjola Lake, New South Wales, Australia	35.2694° S, 150.4835° E	-35.2694	150.483	Corunna Lake, New South Wales, Australia	36.2745° S, 150.1228° E	-36.2745	150.123	Curalo Lagoon, NSW, Australia	37.0510° S, 149.9089° E	-37.051	149.909
Evaluation, Gap Analysis, and Potential Expansion of the Finnish Marine Protected Area Network	Virtanen et al.	2018	2022-12-05	Sarah Joy Bittick			Model		marina		Bay of Bothnia, Finland Coast		62.6644	20.9102	Habitat Fragmentation	Anthropogenic Use			Community & Environment					Distribution	Organismal Diversity			Water Column Temperature	Water Column Dissolved Oxygen	Sediment Characteristics	Water Column Salinity
Evidence for 'critical slowing down' in seagrass: a stress gradiant experiment at the southern limit of its range	El-Hacen M. El-Hacen et al.	2018	2022-11-09	Mehana Muranaka	Field	Manipulative			noltii		mudflats surrounding the iselt of Zira in the Parc National du Banc d'Arguin, Maritania		20.5336	-16.3877	Habitat Fragmentation				Plant, Community, & Environment	Growth				Microbial Diversity				Sediment Characteristics				elevation
Evidence for the interaction between the seagrasses Zostera marina and Zostera japonica on the Pacific Coast of Canada	K. M. Nomme et al. 1991	1991	2022-06-09	Emma Guerrini Romano	Field	Manipulative			marina	noltii	southern Roberts Bank, south of Vancouver, British Columbia, Canada		49.0333	-123.133	Light	Seagrass competition			Plant & Community	Growth	Shoot Density			Distribution
Evidence of grazer control on nitrogen fixation by eelgrass epiphytes in a temperate coastal bay	Reynolds et al. 2015	2015	2021-06-24	James Roe	Field	Manipulative			marina		Snug Harbor and Outer Harbor, MA, USA	41.607°N, 70.638°W	41.607	-70.638	Epiphytes	Herbivory			Plant	Physiological Measures														West Falmouth Harbor, MA, USA	41.607°N, 70.649°W	41.607	-70.649
Examination and optimization of different exergy forms in macrophyte societies	Nielsen	1997	2022-10-04	Sarah Joy Bittick			Model		marina		Roskilde Fjord		55.803	12.058	Light	Nutrients	Hydrodynamics	Herbivory	Plant & Community	Growth				Macroalgae
Excess copper promotes photoinhibition and modulates the expression of antioxidant-related genes in Zostera muelleri	Buapet et al.	2019	2022-10-05	Sarah Joy Bittick	Mesocosm	Manipulative			mulleri		Pittwater, New South Wales, Australia (33°38′45.6″S, 151°17′12.8″E).		-33.646	151.287	Herbicides				Plant	Photosynthetic Output	Physiological Measures											metals
Expanding Greenland seagrass meadows contribute new sediment carbon sinks	Marba, Krause-Jensen, Masque, & Duarte	2018	2023-01-16	Hannah Lyford	Field	Survey			marina		Ameralik, Greenland	64°15′N, 51°35′W	64.25	-51.5833	Carbon	Sediment	Temperature		Plant, Community, & Environment	Physiological Measures	Shoot Density			Distribution				Water Column Turbidity	Water Column Temperature	Sediment Characteristics	Sediment Nutrients			Kapisillit, Greenland	64°28′N, 50°13′W	64.4667	-50.2167	Kobbefjord, Greenland	64°09′N, 51°33′W	64.15	-51.55
Expected and unexpected effects of waterbirds on Mediterranean aquatic plants	Gayet et al. 2012	2012	2021-06-16	James Roe	Field	Manipulative			noltii		Camargue on the They de Roustan, South Eastern France	43° 21′ 09N, 4° 51′ 43E	43.3525	4.86194	Herbivory				Plant	Shoot Density	Growth
Experimental analysis of the response and recovery of Zostera marina (L.) and Halodule wrightii (Ascher.) to repeated light-limitation stress	Patrick D. Biber et al. 2009	2009	2022-06-06	Sadie Kenny	Mesocosm	Manipulative			marina		Seagrass beds in the vicinity of Beaufort, NC	34° 43'N, 76° 40'W	34.7167	-76.6667	Light				Plant	Growth	Physiological Meaures	Photosynthetic Output
Experimental assessment of critical anthropogenic sediment burial in eelgrass Zostera marina	Britta Munkes et al. 2015	2015	2022-06-07	Sadie Kenny	Field	Manipulative			marina		Falckenstein, Kiel Bight, a shallow bay of the Baltic Sea	54°24.388′ N, 010°11.575′ E	54.4065	10.1929	Anthropogenic Use				Plant	Growth	Shoot Density	Physiological Meaures	Reproductive Output									Sediment burial
Experimental climate change weakens the insurance effect of biodiversity	Alsterberg, Eklof, Gamfeldt, Havenhand, Sundback, Wood	2012	2022-12-02	Hannnah Lyford	Mesocosm	Manipulative			marina		Sven Loven Center for Marine Sciences, Kristineberg, Sweden	58.25°N, 11.45°E	58.25	11.45	Temperature	Herbivory	Acidification	Nutrients	Plant, Community, & Environment	Shoot Density	Shoot Survival	Physiological Measures	Photosynthetic Output	Macroalgae	Invertebrates	Organismal Diversity	Chlorophyll A	Water Column pH	Water Column Temperature	Water Column Turbidity	Water Column Dissolved Oxygen
Experimental determination of the effects of light limitation from suspended bag oyster (Crassostrea virginica) aquaculture on the structure and photosynthesis of eelgrass (Zostera marina)	Marc A. Skinner et al. 2014	2014	2022-06-21	Sadie Kenny	Field	Manipulative			marina		Bay St. Simon south (BSS), narrow shallow bay, extending north to south from Shippagan Bay in northeastern New Brunswick		47.7215	-64.7751	Aquaculture Impacts	Light			Plant, Community, & Environment	Growth	Shoot Density	Photosynthetic Output		Epiphytes				Sediment Characteristics	Sediment Nutrients
Experimental impacts of climate warming and ocean carbonation on eelgrass Zostera marina	Zimmerman et al.	2017	2022-12-07	Sarah Joy Bittick	Mesocosm	Manipulative			marina		Owls Creek, VA		36.8216	-75.9837	Acidification	Temperature			Plant & Environment	Shoot Density	Growth	Physiological Measures	Reproductive Output					Water Column pH	Water Column Salinity	Water Column Temperature	Water Column Turbidity
Experimental manipulation of sediment organic content and water column aeration reduces Zostera marina (eelgrass) growth and survival	Mascaro et al. 2009	2009	2021-06-10	James Roe	Mesocosm	Manipulative			marina		Gals Klint, Svenstrup Strand, Fyn, Denmark	55°31'07.1"N 9°41'24.3"E	55.5186	9.69008	Oxygen	Nutrients	Carbon		Plant & Environment	Growth	Physiological Measures							Sediment Characteristics
Experimental studies of heavy metal ion absorption by eelgrass Zostera-marina L. leaves	M. V. Lyubinov et al. 1988	1988	2022-09-21	Emma Guerrini Romano	Field	Survey			marina		Stark Strait of Peter the Great Bay, Sea of Japan		42.6571	131.454	Toxins	Light			Plant & Environment	Physiological Measures	Photosynthetic Output							Water Column pH
Experimental test of biodeposition and ammonium excretion from blue mussels (Mytilus edulis) on eelgrass (Zostera marina) performance	Hanne Fogh Vinther & Marianne Holmer 2008	2008	2022-06-10	Sadie Kenny	Mesocosm	Manipulative			marina		Svenstrup Strand, on the southwest coast of Funen in Lillebælt, Denmark		55.467	9.7556	Invertebrates				Plant, Community, & Environment	Growth	Physiological Meaures	Shoot Density		Epiphytes				Sediment Nutrients	Water Column Nutrients
Experimental test of N-limitation for Zostera nigricaulis seagrass at three sites reliant upon very different sources of N	Hirst and Jenkins 2017	2017	2021-06-22	James Roe	Field	Manipulative			nigricaulis		Port Phillip Bay, Blairgowrie (Eastern Australia)	38°13'44.0"S 144°39'09.2"E	-38.2289	144.653	Nutrients				Plant & Community	Growth	Shoot Density	Physiological Measures		Epiphytes										Kirk Point, eastern coast of Australia	38°02'39.2"S 144°32'01.3"E	-38.0442	144.534	Swan Bay South- eastern coast of Australia	38°21'22.4"S 144°46'27.2"E	-38.3562	144.774
Experimental test of oyster restoration within eelgrass	Valdez, Peabody, Allen, Blake, & Ruesink	2016	2022-12-22	Hannah Lyford	Field	Manipulative		Management	marina		Mission Creek study site, Hood Canal, WA, USA	47.4238°N, 122.8748°W	47.4238	-122.875	Invertebrates	Anthropogenic Use			Plant & Community	Shoot Density	Physiological Measures			Invertebrates	Seagrass competition	Distribution	Organismal Diversity
Expressed sequence tags from heat-shocked seagrass Zostera noltii (Hornemann) from its southern distribution range	Mass et al. 2011	2011	2021-10-22	Devin Ferguson	Field	Manipulative			noltii		Ria Formosa, Portugal		37.0182	-8.00315	Temperature				Plant	Photosynthetic Output														Praia de Faro, Portugal		37.0071	-7.99537	Olhão, Portugal		37.0226	-7.83927	Portimão, Portugal		37.1359	-8.53401
Facilitation of seagrass Zostera marina productivity by suspension-feeding bivalves	Wall, Peterson, & Gobler	2008	2022-11-23	Hannah Lyford	Mesocosm	Manipulative			marina		Stony Brook–Southampton Marine Science Center, NY, USA	40.9043° N, 73.1178° W	40.9043	-73.1178	Nutrients	Light			Plant, Community, & Environment	Growth	Photosynthetic Output	Physiological Measures	Shoot Density	Invertebrates	Macroalgae	Chlorophyll A		Water Column Nutrients	Water Column Turbidity	Water Column Dissolved Oxygen
Factors controlling nitrogen fixation in temperate seagrass beds	Cook et al. 2015	2015	2021-06-22	James Roe	Field	Survey			mulleri	nigricaulis	Port Phillip Bay, Australia	38°21'22.4"S 144°46'27.2"E	-38.3562	144.774	Nutrients				Plant, Community, & Environment	Physiological Measures	Photosynthetic Output	Growth		Macroalgae				Sediment Characteristics
Factors controlling the vertical zonation of the intertidal seagrass, Zoster japonica in its native range in the northwestern Pacific	Seung Hyeon Kim et al.	2020	2022-11-23	Mehana Muranaka	Field	Manipulative			japonica	marina	Koje bay on the southrn coast of korea		35.0665	128.513	Seagrass competition	Light	Sediment		Plant & Community	Shoot Density	Reproductive Output	Growth	Photosynthetic Output	Distribution
Factors controlling Zostera marina L. growth in the eastern and western Pacific Ocean: Comparisons between Korea and Oregon, USA	Kaldy & Lee 2007	2007	2021-06-10	Devin Ferguson	Field	Survey			marina		Jindong Bay, South Korea	35°07'N 128°29'E	35.1167	128.483	Light	Temperature	Nutrients		Plant & Environment	Shoot Density	Growth							Water Column Temperature	Sediment Nutrients	Water Column Salinity				Yaquina Bay, Oregon	44°38'N 124°01'W	44.6333	-124.017
Factors influencing primary production of seagrass beds (Zostera noltii Hornem.) in the Thau lagoon (French Mediterranean coast)	Martin Plus et al. 2001	2001	2022-05-16	Sadie Kenny	Field	Survey			noltii		Thau Lagoon (French Mediterranean coast)		43.3833	3.61667	Light	Temperature	Nutrients		Plant & Environment	Shoot Density	Physiological Meaures	Photosynthetic Output						Water Column Dissolved Oxygen	Water Column Nutrients	Water Column Salinity
Factors Influencing Spatial and Annual Variability in Eelgrass (Zostera marina L.) meadows in Willapa Bay, Washington, and Coos Bay, Oregon, Estuaries	Thom et al. 2003	2003	2021-11-05	Devin Ferguson	Field	Survey			marina		Willapa Bay, Washington		46.5403	-123.988	Temperature	Salinity			Plant	Shoot Density	Growth													Coos Bay, Oregon		43.3885	-124.201
Faunal Communities Are Invariant to Fragmentation in Experimental Seagrass Landscapes	Lefcheck, Marion, Lombana, & Orth	2016	2022-12-12	Hannah Lyford	Field	Manipulative			marina		York River Estuary, lower Chesapeake Bay, USA	37.22 N, 76.48 W	37.22	-76.48	Habitat Fragmentation	Anthropogenic Use			Plant & Community	Physiological Measures	Growth	Shoot Density		Organismal Diversity	Epiphytes	Seagrass competition								James River Estuary, lower Chesapeake Bay, USA	37.02 N, 76.35 W	37.02	-76.35	James River Estuary, lower Chesapeake Bay, USA	37.02 N, 76.32 W	37.02	-76.32
Field experimental evidence that grazers mediate transition between microalgal and seagrass dominance	Pamela L. Reynolds et al. 2014	2014	2022-06-20	Sadie Kenny	Field	Manipulative			marina		Southeast side of the Goodwin Islands National Estuarine Research Reserve, York River estuary, mouth of the Chesapeake Bay, Virginia	37°13'N, 76°23'W	37.2167	-76.3833	Herbivory	Nutrients			Plant & Community	Growth	Physiological Meaures			Epiphytes	Chlorophyll A
Fifty years of ecological changes: Regime shifts and drivers in a coastal Mediterranean lagoon during oligotrophication	Derolez et al.	2020	2023-01-16	Sarah Joy Bittick	Field	Survey			noltii	marina	Thau Lagoon		43.4226	3.62084	Nutrients	Temperature	Aquaculture Impacts		Plant, Community, & Environment	Growth				Chlorophyll A	Macroalgae	Distribution	Invertebrates	Water Column Nutrients	Water Column Turbidity	Water Column Temperature	Sediment Characteristics
Finding some seagrass optimism in Wales, the case of Zostera noltii	C. M. Bertelli et al. 2018	2018	2022-11-27	Emma Guerrini Romano	Field	Survey			noltii		Milford Haven, UK		51.7096	-5.03419	Nutrients					Shoot Density				Distribution
First occurrence of the invasive tunicate Didemnum vexillum in eelgrass habitat	M. R. Carman et al. 2010	2010	2022-06-13	Emma Guerrini Romano	Field	Survey			marina		Lake Tashmoo, Martha's Vineyard, Massachussets, USA		41.4644	-70.6274	Invertebrates	Invasion			Community					Distribution	Organismal Diversity
Fish assemblages in habitats dominated by Caulerpa taxifolia and native seagrasses in south-eastern Australia	York et al.	2006	2022-10-05	Sarah Joy Bittick	Field	Survey			capricornii		Botany Bay, a large, marine-dominated embayment in the southern suburbs of Sydney (34°00’S, 151°14’E).		-34	151.233	Invasion				Community & Environment					Organismal Diversity				Water Column Salinity	Water Column Temperature					Port Hacking (34°05’S, 151°09’E)		-34.0833	151.15
Flow velocity and light level drive non-linear response of seagrass Zostera noltei to ammonium enrichment	Beatriz Villazán et al. 2016	2016	2022-06-13	Sadie Kenny	Mesocosm	Manipulative			noltii		Intertidal bed at Los Toruños salt marsh (Cádiz Bay Natural Park, southern Spain)	36° 30’ N, 6° 10’ W	36.5	-6.16667	Light	Hydrodynamics	Nutrients		Plant & Environment	Growth	Physiological Meaures							Water Column Nutrients
Flowering in a Zostera Marina Bed Off San Juan Island (Washington, U.S.A.) During Winter	Gambi 1988	1988	2021-06-04	Devin Ferguson	Field	Survey			marina		cove of Mar Vista on the southwest coast of San Juan Island in front of Haro Strait, Washington, U.S.A.	48°29'N 123°05'W	48.4833	-123.083	Temperature				Plant	Shoot Density	Growth
Food related loss and recovery of intertidal seagrass meadows in southern Queensland, Australia	S. J. Campbell et al. 2004	2004	2022-10-16	Emma Guerrini Romano	Field	Survey			capricornii		Wanggoolba Creek, the Great Sandy Strait, Australia		-25.4444	152.988	Hydrodynamics	Light	Nutrients		Plant, Community, & Environment	Growth	Shoot Density	Reproductive Output		Distribution				Sediment Characteristics	Water Column Salinity	Water Column Nutrients	Water Column Turbidity			Urangan		-25.2874	152.911
Food web analysis in intertidal Zostera marina and Zostera noltii communities in winter and summer	Vincent Ouisse et al. 2012	2012	2022-11-14	Sadie Kenny	Field	Survey			marina		Two temperate intertidal seagrass beds in a mega-tidal system near Roscoff (Wes- tern English Channel, France		48.7	-3.96667	Temperature				Plant & Environment	Physiological Measures	Growth							Sediment Nutrients
Food web structure within an estuary of the southern gulf of st. lawrence undergoing eutrophication	Allison Schein et al.	2013	2022-12-12	Mehana Muranaka	Field	Survey			marina		stanley river estuary complex		46.4519	-63.4525	Nutrients				Plant, Community, & Environment	Physiological Measures				Invertebrates	Macroalgae			Water Column Nutrients
Food-web structure of seagrass communities across different spatial scales and human impacts	Marta Coll et al.	2011	2022-12-12	Mehana Muranaka	Field	Survey			marina		Tabousintac Bay, New Brunswick		47.3822	-64.9392	Anthropogenic Use				Community					Organismal Diversity	Distribution									Cocagne Bay		46.3669	-64.6025	Midgell Estuary, prince Edward Island		46.4169	-62.6183	Freeland estuary		46.6914	-63.9444
Form-function relationships in a marine foundation species depend on scale: a shoot to global perspective from a distributed ecological experiment	Ruesnik et al.	2018	2022-10-26	Sarah Joy Bittick	Field	Manipulative			marina		14 sites spanning 32–61°N latitude, Alphabetic order		59.39	-151.683	Herbivory	Nutrients			Plant, Community, & Environment	Growth	Physiological Measures			Epiphytes				Water Column Salinity	Water Column Temperature					Bodega Bay		38.32	-123.033	British Columbia		49	-123.1	Angso Island, Finland		60.1	21.7	JN Akkeshi-ko		43.07	144.91
Foundation species identity and trophic complexity affect experimental seagrass communitites	Althea F. P. Moore and J. Emmett Duffy	2016	2022-11-09	Mehana Muranaka	Mesocosm	Manipulative			marina		chesapeake bay, york river estuary on the western shore		37.2482	-76.497	Herbivory				Plant & Community	Growth				Invertebrates	Organismal Diversity	Macroalgae
Fractal measures of spatial pattern as a heuristic for return rate in vegetative systems	Irvine et al	2016	2023-01-14	Hannah Lyford			Model		marina		Broad Ledges Tresco, Isles of Scilly, UK	49◦56.4_x0006_ N, 06◦19.6_x0006_ W	49.94	-6.32667	Seagrass competition	Light	Habitat Fragmentation		Plant, Community, & Environment	Reproductive Output	Shoot Density	Growth		Distribution	Seagrass competition			Water Column Turbidity	Water Column Temperature	Sediment Characteristics				Higher Town Bay, Isles of Scilly, UK	49◦57.2_x0006_ N, 06◦16.6_x0006_ W	49.9533	-6.27667	Little Arthur, Isles of Scilly, UK	49◦56.9_x0006_ N, 06◦15.9_x0006_ W	49.9483	-6.265	Old Grimsby Harbor, Isles of Scilly, UK	49◦57.6 N, 06◦19.8 W	49.96	-6.33	West Broad Ledges, Isles of Scilly, UK	49◦57.5 N, 06◦18.4 W	49.9583	-6.30667
Fresh carbon inputs to seagrass sediments induce variable microbial priming responses	Trevathan-Tackett et al.	2018	2023-01-16	Sarah Joy Bittick	Mesocosm	Manipulative			mulleri		m Fagans Bay in New South Wales, Australia		-33.4306	151.321	Carbon	Sediment	Habitat Fragmentation		Plant, Community, & Environment	Physiological Measures				Microbial Diversity				Sediment Characteristics
From rooted to floating vegetal species in lagoons as a consequence of the increases of external nutrient load: An analysis by model of the species selection mechanism	Cioffi and Gallerano	2006	2022-11-23	Hannah Lyford			Model		marina		Lagoon of Tortoli, Sardinia, Italy	39.926574 N, 9.656073 E	39.9266	9.65607	Nutrients	Light	Hydrodynamics		Plant, Community, & Environment	Shoot Survival	Physiological Measures	Shoot Density		Distribution	Macroalgae			Water Column Nutrients	Sediment Nutrients	Water Column Turbidity
Functional diversity of mesograzers in an eelgrass–epiphyte system	Jaschinski & Sommer	2008	2022-11-29	Hannnah Lyford	Mesocosm	Manipulative			marina		Leibniz Institute of Marine Sciences, Kiel, Germany	54.329877 N, 10.148584 E	54.3299	10.1486	Epiphytes	Herbivory			Plant & Community	Growth	Photosynthetic Output	Shoot Density	Physiological Measures	Epiphytes	Invertebrates	Organismal Diversity
Genetic diversity and connectivity remain high in eelgrass Zostera marina populations in the Wadden Sea, despite major impacts	Ferber, Olsen, Stam	2008	2022-11-29	Hannnah Lyford	Field	Survey			marina		Zeeland, Netherlands	51.4940° N, 3.8497° E	51.494	3.8497	Habitat Fragmentation	Genomics			Plant & Community	Physiological Measures	Reproductive Output			Organismal Diversity	Distribution									Norddeich, Germany	53.6166° N, 7.1587°E	53.6166	7.1587	Schleswig-Holstein, Germany	54.5250° N, 9.5608° E	54.525	9.5608	Sylt, Germany	54.9083° N, 8.3180° E	54.9083	8.318	Romo, Denmark	55.1389° N, 8.5139° E	55.1389	8.5139
Genetic diversity and disturbance interact to influence seagrass productivity	Hughes & Stachowicz	2007	2022-11-17	Hannah Lyford	Field	Manipulative			marina		Bodega Harbor, California, USA	38.3244 N, -123.0386 W	38.3244	-123.039	Nutrients	Genomics	Anthropogenic Use		Plant, Community, & Environment	Growth	Physiological Measures	Shoot Survival	Shoot Density	Macroalgae				Water Column Nutrients
Genetic diversity and its implications in the conservation of endangered Zostera japonica in Korea	Lee et al.	2004	2022-10-25	Sarah Joy Bittick	Field	Survey			japonica		- Hwajinpo, Anmyeon-do Island, and Geoje-do Island	N 38 ~ 28' 40.4", E 128 ~ 26' 20.6"	38.4779	128.439	Genomics	Habitat Fragmentation			Plant	Physiological Measures	Shoot Density													Anmyeon-do Island,	N 36 ~ 29' 17.7", E 126 ~ 22' 44.7"	36.4883	126.379	3: Geoje-do Island.	N 34 ~ 43' 57.8" E 128 ~ 37' 55.4"	34.7327	128.632
Genetic Diversity Enhances Restoration Success by Augmenting Ecosystem Services	Reynolds, McGlathery, Waycott	2012	2022-12-06	Hannah Lyford	Field	Manipulative		Restoration	marina		Mobjack Bay, VA, USA	37.3219° N, 76.3522° W	37.3219	-76.3522	Genomics	Light	Temperature		Plant, Community, & Environment	Physiological Measures	Shoot Survival	Shoot Density	Growth	Distribution	Organismal Diversity	Invertebrates		Water Column Turbidity	Water Column Temperature					York River in Chesapeake Bay, VA	37° 14' 31.20" N, 76° 22' 34.19" W	37.242	-76.3762	South Bay, VA	37.223628 N, -75.873770 W	37.2236	-75.8738	Hog Island Bay, Virginia LTER, VA	37.449029 N, -75.795192 W	37.449	-75.7952
Genetic diversity enhances the resistance of a seagrass ecosystem to disturbance	A. R. Hughes et al. 2004	2004	2022-10-02	Emma Guerrini Romano	Field	Manipulative			marina		Bodega Bay, CA		38.3142	-123.054	Habitat Fragmentation	Herbivory			Plant, Community, & Environment	Shoot Density	Physiological Measures			Organismal Diversity	Epiphytes	Invertebrates		Sediment Nutrients	Water Column Nutrients
Genetic Relatedness Influences Plant Biomass Accumulation in Eelgrass (Zostera marina)	John J. Stachowicz et al. 2013	2013	2022-10-02	Sadie Kenny	Field	Survey			marina		Bodega Harbor and nearby Tomales Bay		38.3219	-123.051	Genomics				Plant	Shoot Density	Growth
Genetic Structure and Diversity of the Eelgrass Zostera marina L. (Zosteraceae) in Sagami Bay, Japan	Tanaka & Lim	2010	2022-11-26	Hannnah Lyford	Field	Survey		Restoration	marina		Sagami Bay, Japan	35.2326° N, 139.3644° E	35.2326	139.364	Genomics				Plant	Reproductive Output	Shoot Density	Shoot Survival
Genotype-specific responses to light stress in eelgrass Zostera marina, a marine foundation plant	Salo, Reusch, Bostrom	2015	2022-12-09	Hannah Lyford	Field	Manipulative			marina		Sandon, Finland	60° 02.164’ N, 22° 20.47’ E	60.0361	22.3412	Light	Genomics	Temperature		Plant & Community	Physiological Measures	Reproductive Output	Growth	Shoot Density	Organismal Diversity	Distribution									Faro, Finland	59° 55.219’ N, 21° 47.711’ E	59.9203	21.7952
Genotypic diversity and grazer identity interactively influence seagrass and grazer biomass	A. Randall Hughes, Rebecca J. Best, John J. Stachwicz	2010	2022-10-29	Mehana Muranaka	Mesocosm	Manipulative			marina		Bodega Marine laboratories outdoor mesocosms		38.318	-123.072	Genomics	Herbivory			Plant & Community	Shoot Density	Growth			Epiphytes
Genotypic Temperature Adaptions of Cellular Functions and Proteins in 2 Zostera Species	Lutova and Feldman, 1981	1981	June 15th	Madi Firnett	Field	Manipulative			marina	noltii	Sevastopol Bay on the Black Sea	44° 37' 3" N, 33° 33' 14" E	44.6175	33.5539	Temperature				Plant	Physiological Measures
Germination and early-stage development in the seagrass, Zostera muelleri Irmisch ex Asch in response to multiple stressors	Stafford-Bell et al.	2016	2022-12-05	Sarah Joy Bittick	Mesocosm	Manipulative			mulleri		(Wynnum, Moreton Bay, Queensland, Australia 27◦26_x0005_ 3.47_x0005__x0005_S; 153◦10_x0005_ 26.43_x0005__x0005_E		-27.4343	153.174	Salinity	Temperature	Light		Plant	Reproductive Output	Physiological Measures
Germination in the marine phanerogam Zostera noltii Hornemann at Golfe Juan, French Mediterranean	Loques, Caye, & Meinesz, 1990	1990	2022-02-21	Hannah Lyford	Mesocosm	Manipulative			noltii		Baie de Golfe Juan, France	43.5601°N, 7.0958° E	43.5601	7.0958	Temperature	Salinity	Hydrodynamics		Plant	Shoot Survival	Growth	Reproductive Output
Germination is Zoster japonica is determined by cold stratification, tidal elevation and sediment type	Morita et al. 2011	2011	2021-10-22	Devin Ferguson	Mesocosm	Manipulative			japonica		Matsunase, Ise Bay, Japan		34.6	136.583	Temperature	Sediment	Hydrodynamics		Plant	Reproductive Output
Germination, storage and viability testing of seeds of Zostera capricorni Aschers. from a tropical bay in Australia	Conacher, Poiner, Butler, Pun, & Tree, 1994	1994	2022-04-10	Hannah Lyford	Mesocosm	Manipulative		Restoration	capricorni		Moreton Bay, Queensland, Australia	27° 25' S, 153° 20' E	-27.4167	153.333	Salinity	Temperature	Sediment		Plant & Community	Growth	Shoot Density	Reproductive Output		Distribution
Getting the measure of eutrophication in the Baltic Sea: towards improved assessment principles and methods	Andersen et al.	2011	2022-10-18	Sarah Joy Bittick	Field	Survey	Model		marina		176 sites in the Baltic, Bothnian Bay		64.5997	21.3501	Nutrients	Light			Plant, Community, & Environment	Shoot Density				Chlorophyll A	Invertebrates	Organismal Diversity		Water Column Nutrients						Gulf of Finland		59.8072	26.2452	Gulf of Riga		57.3426	23.8083	Northern Baltic Proper		59.4537	19.3121	Gotland Basin		57.0835	18.4964
Grazer diversity effects in an eelgrass–epiphyte– microphytobenthos system	Jaschinski et al. 2009	2009	2021-06-15	James Roe	Mesocosm	Manipulative			marina		Kiel Fjord	54°21'12.5"N 10°10'07.7"E	54.3535	10.1688	Herbivory				Plant & Community	Growth				Epiphytes	Chlorophyll A	Organismal Diversity
Grazer Functional Roles, Induced Defenses, and Indirect Interactions: Implications for Eelgrass Restoration in San Francisco Bay.	Lewis & Boyer	2014	2022-12-16	Hannah Lyford	Field	Manipulative	Mesocosm	Restoration	marina		Bay Farm Island in Alameda, California, USA	37°43′41′′N, 122°14′52′′W	37.7281	-122.248	Herbivory	Epiphytes			Plant & Community	Shoot Survival	Physiological Measures	Shoot Density		Distribution	Organismal Diversity	Epiphytes	Invertebrates							San Pablo Bay region of San Francisco Bay, CA, USA	37°58′28′′N, 122°25′04′′W	37.9744	-122.418
Grazer specialisation and temperature effects on epiphytic fouling: conservation implications for a temperate african seagrass (zostera capensis)	Deena Pillay, Christopher Waspe	2019	2023-01-19	Mehana Muranaka	Mesocosm	Manipulative			capensis		Langebaan Lagoon South Africa		-33.1358	18.0612	Temperature	Herbivory			Plant & Community	Shoot Survival	Growth			Epiphytes	Invertebrates
Growing depth limit of Zostera caulescens in coastal waters along the Japan Sea coast of Honshu Japan	Y. Sakanishi et al. 2017	2017	2022-11-29	Emma Guerrini Romano	Field	Survey			caulescens		Ryotsu Bay, Sado Island, Honshu, Japan		38.1293	138.453	Light				Plant, Community, & Environment	Growth	Photosynthetic Output	Reproductive Output	Shoot Density	Distribution				Water Column Temperature						Tsukumo Bay		37.3033	137.238	Sado Island		37.9142	138.489
Growth adaptability of Zostera marina at different habitats of the Swan Lake in Rongcheng, China	Mei-yu et al.	2017	2023-01-05	Sarah Joy Bittick	Field	Survey			marina		Swan Lake, Rongcheng, China	（３７°２１′ Ｎ，１２２°３２′ Ｅ）	37.35	122.533	Habitat Fragmentation				Plant & Environment	Growth	Reproductive Output							Sediment Characteristics	Water Column Temperature
Growth and oganic production of eelgrass (Zoster-marina L.) in temperate waters of the pacific coast of Japan (II. GROWTH ANALYSIS IN WINTER)	K Aioi et al. 1981	1981	2022-06-01	Sadie Kenny	Mesocosm	Survey			marina		Nabeta Bay, Japan		34.666	138.936	Light	Temperature			Plant	Growth
Growth and photosynthetic responses to temperature of 2 populations of Zostera marina	Ann S. Evans	1983	2022-07-31	Juliette	Mesocosm	Manipulative			marina		Bourne Pond (Falmouth, MA)	41° 35' 06.0" N, 70° 31' 09.8" W /	41.585	-70.5194	Temperature				Plant	Growth	Shoot Density	Reproductive Output	Photosynthetic Output											Great Harbor (Woods Hole, MA)	41° 31' 32.7" N 70° 40' 55.7" W	41.5257	-70.6821
Growth and physilogical responses of three seagrass species to elevated sediment nutrients in Moreton Bay, Australia	J. W. Udy et al. 1997	1997	2022-05-20	Emma Guerrini Romano	Field	Manipulative			capricornii		Wanga Wallen banks on North Stradbroke Island, Australia		-27.4167	153.367	Nutrients				Plant & Community	Shoot Density	Growth	Physiological Measures		Chlorophyll A
Growth and Population Dynamics of Zostera marina Due to Changes in Sediment Composition in the Seomjin Estuary, Korea	Kim et al.	2015	2022-12-06	Sarah Joy Bittick	Field	Survey			marina		Seomjin Estuary		34.9391	127.795	Sediment	Temperature	Nutrients	Light	Plant & Environment	Growth	Shoot Density	Reproductive Output						Water Column Nutrients	Sediment Nutrients	Water Column Temperature	Sediment Characteristics	hydrodynamics
Growth and productivity of intertidal Zostera capricorni in New Zealand estuaries	S.J. Turner 2010	2010	2022-05-20	Sadie Kenny	Field	Survey			capricornii		Three New Zealand estuaries in Coromandel Peninsula		-36.7	175.75	Temperature				Plant	Growth	Shoot Density
Growth characteristics of a restored Zostera marina population in the Shandong Peninsula, China: A case study	Tang, ,Wang, & Zhang	2019	2022-12-05	Hannnah Lyford	Field	Manipulative		Restoration	marina		Xiaoheishan Island, Shandong Peninsula, China	120.644°E, 37.971°N	37.971	120.644	Sediment	Toxins	Nutrients		Plant & Environment	Physiological Measures	Shoot Density	Growth						Sediment Characteristics	Sediment Nutrients	Water Column Nutrients	Water Column Temperature			Lidao Bay, Shandong Peninsula, China	37.9060° N, 121.6027° W	37.906	121.603
Growth Dynamics and Carbon Incorporation of the Seagrass, Zostera marina L. in Jindong Bay and Gamak Bay on the Southern Coast of Korea	Kim et al.	2008	2022-12-02	Sarah Joy Bittick	Field	Survey			marina		JIndong Bay and Gamak Bay, Korea	(128° 32’ 41”E, 35° 06’ 36”N)과 가막만(127° 43’ 16”E, 34° 37’ 53”N)	35.11	128.545	Light	Temperature	Nutrients		Plant & Environment	Growth	Shoot Density	Reproductive Output	Physiological Measures					Water Column Temperature	Water Column Salinity	Water Column Turbidity	Water Column Nutrients
Growth Dynamics of Eelgrass, Zostera marina, in the Intertidal Zone of Seomjin Estuary, Korea	Jeong Bae Kim et al. 2013	2013	2022-11-14	Sadie Kenny	Field	Survey			marina		Intertidal zone of Seomjin Estuary, Korea,		34.95	127.76	Temperature	Light	Hydrodynamics	Nutrients	Plant	Shoot Density	Growth
Growth dynamics of the deep-water Asian eelgrass, Zostera asiatica, in the eastern coastal waters of Korea	Park et al.	2016	2022-09-29	Sarah Joy Bittick	Field	Survey			asiatica	asiatica	Samcheok city, Gangwon-do (37°07'32"N, 129°23'05"E)		37.1256	129.385	Light	Temperature			Plant & Environment	Growth	Shoot Density	Reproductive Output		Invertebrates				Water Column Nutrients	Water Column Salinity
Growth dynamics of the seagrass Zostera japonica at its upper and lower distributional limits in the intertidal zone	Jong-Hyeob Kim et al. 2016	2016	2022-06-14	Sadie Kenny	Field	Survey			japonica		Koje Bay on the south coast of Korea		34.7913	128.556	Temperature	Light	Nutrients		Plant	Growth	Shoot Density
Growth Dynamics of Zostera marina Transplants in the Nakdong Estuary Related to Environmental Changes	Park et al.	2011	2022-12-06	Sarah Joy Bittick	Field	Survey			marina		Nakdong Estuary	(35°02′28″N, 128°57′49″E)	35.0411	128.964	Salinity				Plant & Environment	Growth	Shoot Survival	Shoot Density						Water Column Temperature	Water Column Salinity	Water Column Nutrients	Sediment Nutrients
Growth effects of shading and sedimentation in two tropical seagrass species: Implications for port management and impact assessment	Benham, Beavis, Hendry & Jackson	2016	2022-12-17	Hannah Lyford	Field	Manipulative		Management	mulleri		Pelican Banks, Australia	25.2339° S, 152.9655° E	-25.2339	152.965	Sediment	Light			Plant & Environment	Shoot Survival	Shoot Density	Growth						Sediment Characteristics	Sediment Nutrients	Water Column Turbidity
Growth indicator response of Zostera japonica under different salinity and turbidity stresses in the Yellow River Esetuary, China	Hou et al. 2020	2020	2021-06-07	Devin Ferguson	Mesocosm	Manipulative			japonica		north shore are of Yellow River Estuary, China	37°44'17.04"N 119°15'10.25"E	37.7381	119.253	Salinity	Sediment			Plant	Growth
Growth of the seagrass Heterozostera tasmania limited by nitrogen in Port Phillip Bay, Australia	Bulthuis et al. 1992	1992	2022-03-22	Devin Ferguson	Field	Manipulative			tasmanica		Rye, Port Phillip Bay, Australia		-38.3658	144.816	Nutrients	Sediment			Plant	Growth	Physiological Measures													South Sands, Port Phillip Bay, Australia		-38.3051	144.79	West Channel, Port Phillip Bay, Australia		-38	144.7	Clifton Springs, Port Phillip Bay, Australia		-38.1468	144.568
Growth patterns of western Mediterranean seagrasses: Species-specific responses to seasonal forcing	Marba, Cebrian, Enriquez, and Duarte, 1996	1996	2022-04-10	Hannah Lyford	Field	Survey			marina	noltii	Cala Jonquet, Girona, Spain	42.303581 N, -3.286501 W	42.3036	3.2865	Light	Temperature			Plant, Community, & Environment	Growth	Shoot Density	Reproductive Output		Distribution				Water Column Temperature	Water Column Turbidity
Growth responses of the intertidal seagrass Zostera japonica to manipulated sea level rise conditions	Seung Hyeon Kim et al. 2018	2018	2022-06-09	Sadie Kenny	Field	Manipulative			japonica		Koje Bay, Southern Coast of Korea	34° 48' N, 128° 35' E	34.8	128.583	Light	Temperature	Hydrodynamics		Plant	Shoot Density	Growth											Stressor: manipulated sea level rise
Growth responses of Zostera marina (eelgrass) to in situ manipulations of sediment nitrogen available	W. C. Dennison et al. 1983	1983	2022-05-28	Emma Guerrini Romano	Mesocosm	Manipulative			marina		Great Harbor, Woods Hole, Falmouth, MA, USA		41.5249	-70.679	Nutrients				Plant	Growth	Shoot Density
Growth of zostera-marina l seedlings under laboratory conditionsof nutrient enrichment	Morris H. Roberts Jr. et al. 1984	1984	2021-06-16	Sadie Kenny	Mesocosm	Manipulative			marina		Seagrass bed adjacent to Guinea Marsh, York River, Virginia	37° 15' N, 76° 30' W	37.25	-76.5	Nutrients				Plant	Growth	Shoot Density
Growth, carbon allocation and proteolytic activity in the seagrass Zostera noltii shaded by Ulva canopies	Brun et al.	2003	2022-10-22	Sarah Joy Bittick	Mesocosm	Manipulative			noltii		e Cadiz Bay Natural Park (36°30′ N, 6°10′ W)		36.5	-6.16667	Light				Plant	Growth	Physiological Measures	Photosynthetic Output
Habitat Model of Eelgrass in Danish Coastal Waters: Development, Validation and Management Perspectives	Staehr et al.	2019	2023-02-06	Sarah Joy Bittick			Model		marina		All Danish coastal waters		57.692	10.1152	Light	Temperature	Salinity	Oxygen	Plant, Community, & Environment	Shoot Density	Growth			Distribution				Water Column Temperature	Water Column Salinity	Water Column Dissolved Oxygen	Sediment Characteristics	hydrodynamics, sediment
Habitat Requirements for Submerged Aquatic Vegetation in Chesapeake Bay: Water Quality, Light Regime, and Physical-Chemical Factors	Kemp et al., 2004	2004	2022-11-14	Hannah Lyford			Model		marina		Chesapeake Bay, Virginia, USA	37.5214° N, 76.1050° W	37.5214	-76.105	Light	Sediment	Hydrodynamics		Plant, Community, & Environment	Shoot Density				Distribution	Chlorophyll A			Water Column Nutrients	Sediment Characteristics	Water Column Turbidity
Heavy metal spatial variation, bioaccumulation, and risk assessment of Zostera japonica habitat in the Yellow River Estuary, China	Lin et al.	2016	2022-10-24	Sarah Joy Bittick	Field	Survey			japonica		Bohai Sea	38°00′28″, E 118°5′45″	38.0078	118.096	Toxins				Plant & Environment	Physiological Measures								Sediment Characteristics						South	37°43′45″, E 119°14′02″	37.7292	119.234	St. 2 (N37°57′04″, E119°01′01″)				St. 3 (N37°54′48″, E119°05′43″)				St. 4 (N37°51′13″, E119°06′10″)
Herbicide contamination and the potential impact to seagrass meadows in Hervey Bay, Queensland, Australia	McMahon et al.	2005	2022-09-26	Sarah Joy Bittick	Field	Survey			mulleri		Hervey Bay, Queensland Australia	-	-25.2576	152.737	Herbicides				Plant	Photosynthetic Output
Herbivory in a subtropical seagrass ecosystem: separating the functional role of different grazers	Ebrahim, Olds, Maxwell, Pitt , Burfeind, & Connolly	2014	2022-12-12	Hannah Lyford	Field	Manipulative			mulleri		Waterloo Bay, West Moreton Bay, Australia	27°15’ S, 153°15’ E	-27.25	153.25	Nutrients	Herbivory	Epiphytes	Light	Plant, Community, & Environment	Physiological Measures	Growth	Shoot Density		Organismal Diversity	Invertebrates	Epiphytes	Macroalgae	Water Column Turbidity	Water Column Nutrients	Water Column Dissolved Oxygen
High ammonium availability amplifies the adverse effect of low salinity on eelgrass Zostera marina	Villazan et al. 2015	2015	2021-06-17	James Roe	Mesocosm	Manipulative			marina		Isefjorden, Denmark	55° 42’ 44’’N , 11° 47’ 35’’E	55.7122	11.7931	Salinity	Nutrients			Plant & Environment	Photosynthetic Output	Growth	Physiological Measures						Water Column Nutrients				Shoot Mortality
High mortality of Zostera marina under high temperatures regimes but minor effects of the invasive macroalgae Gracilaria vermiculophylla	Höffle et al. 2011	2011	2021-06-12	Devin Ferguson	Mesocosm	Manipulative			marina		Gals Klint, Island Fyn, Denmark	55°30'N 09°40'E	55.5	9.66667	Invasion	Temperature			Plant, Community, & Environment	Growth	Physiological Measures	Shoot Density		Macroalgae				Water Column Temperature	Water Column Nutrients	Sediment Nutrients				Svenstrup Strand, Island Fyn, Denmark	55°28'N 09°45'E	55.4667	9.75	Fyns Hoved, Island Fyn, Denmark	55°36'N 10°36'E	55.6	10.6
High sulfide intrusion in five temperate seagrasses growing under contrasting sediment conditions	M. Holmer et al. 2013	2013	6/27+ 8/22/2022	Emma Guerrini Romano	Field	Survey			nigricaulis		Two People's Bay (TPB), Australia		-34.97	118.175	Toxins					Growth	Shoot Density	Physiological Measures						Sediment Characteristics						Woodmans Point (WP)		-32.1393	115.764	Rottnest Island (RI)		-32.0164	115.476
High temperatures cause reduced growth, plant death and metabolic changes in eelgrass Zostera marina	Kathrine Jul Hammer et al. 2018	2018	2022-06-09	Sadie Kenny	Mesocosm	Manipulative			marina		Shallow water surrounding Goodwin Island, Virginia, USA	37° 13’ 1“ N, 76° 23’ 19“ W	37.2169	-76.3886	Temperature				Plant	Growth	Physiological Meaures	Shoot Density
High water temperature tolerance in photosynthetic activity of Zostera japonica Ascherson & Graebner seedlings from Ago Bay, Mie Prefecture, central Japan	Mahiko Abe et al. 2009	2009	2022-05-28	Sadie Kenny	Mesocosm	Manipulative			japonica		Tategami-ura, Ago Bay, Mie Prefecture		34.2925	136.808	Temperature	Light			Plant	Photosynthetic Output
High water-temperature tolerance in photosynthetic activity of Zostera marina seedlings from Ise Bay,Mie Prefecture, central Japan	Mahiko Abe et al. 2008	2008	2022-05-17	Sadie Kenny	Mesocosm	Manipulative			marina		Ise Bay, central Japan		34.7167	136.7	Temperature				Plant	Photosynthetic Output
Higher seagrass cover and biomass increases sexual reproductive effort: A rare case study of Zostera muelleri in New Zealand	Dos Santos and Matheson	2017	2022-11-30	Sarah Joy Bittick	Field	Survey			mulleri		n Tauranga Harbour (Latitude: −37◦ 41_x0004_ 7”, Longitude: 176◦ 9_x0004_ 58”)		-37.6853	176.163	Light	Temperature			Plant & Environment	Shoot Density	Reproductive Output	Growth		Macroalgae				Water Column Temperature	Sediment Nutrients	Water Column Turbidity
Highly Disturbed Populations of Seagrass Show Increased Resilience but Lower Genotypic Diversity	Connolly et al.	2018	2022-12-13	Sarah Joy Bittick	Field	Survey			mulleri		Moreton Bay		-27.4703	153.265	Nutrients	Habitat Fragmentation	Genomics		Plant	Physiological Measures	Growth	Photosynthetic Output
Historical and present distribution of Zostera marina in the high north (Troms County, northern Norway)- a decline over the last century	N. M. Jørgensen et al. 2013	2013	2022-11-12	Emma Guerrini Romano	Field	Survey			marina		Troms County, Norway		69.8669	18.5542	Aquaculture Impacts	Nutrients			Plant & Community	Growth				Distribution
Historical Comparison of Fish Community Structure in Lower Chesapeake Bay Seagrass Habitats	Sobocinski et al.	2012	2022-12-13	Sarah Joy Bittick	Field	Survey			marina		Guinea Marsh and Browns Bay, Chesapeake		37.2778	-76.3749	Temperature				Plant, Community, & Environment	Shoot Density				Organismal Diversity	Distribution			Water Column Temperature	Water Column Salinity	Water Column Dissolved Oxygen
Historical seagrass mapping in Port Phillip Bay, Australia	Ball, Soto-Berelov, & Young	2014	2022-12-17	Hannah Lyford	Field	Survey			nigricaulis	mulleri	Blairgowrie, Port Phillip Bay, Australia	-38.360381, 144.780491	-38.3604	144.78	Nutrients	Anthropogenic Use	Hydrodynamics	Light	Plant & Community	Shoot Density	Shoot Survival	Growth		Distribution	Organismal Diversity									St. Leonards, Port Phillip Bay, Australia	-38.176609, 144.721018	-38.1766	144.721	Bellarine Bank, Port Phillip Bay, Australia	-38.119349, 144.606367	-38.1193	144.606
How do nutrient conditions and species identity influence the impact of mesograzers in eelgrass-epiphyte systems?	Jaschinski & Sommer 2011	2011	2021-11-12	Devin Ferguson	Mesocosm	Manipulative			marina		Falkenstein Beach, in the inner Kiel Fjord, Germany		54.35	10.15	Nutrients	Epiphytes	Herbivory		Plant & Community	Growth	Physiological Measures			Epiphytes
Hydrodynamics in a shallow seasonally low-inflow estuary following eelgrass collapse	Walter, Rainville, & O'Leary	2018	2023-01-11	Hannah Lyford	Field	Survey			marina		Bay Mouth, Morro Bay, CA, USA	35.368979, -120.858361	35.369	-120.858	Hydrodynamics	Salinity	Temperature	Light	Plant, Community, & Environment	Shoot Density	Shoot Survival			Distribution	Chlorophyll A			Water Column Salinity	Water Column Temperature	Water Column Dissolved Oxygen	Water Column Turbidity			Bay Center, Morro Bay, CA, USA	35.347079, -120.848471	35.3471	-120.848	Bay Head, Morro Bay, CA, USA	35.326044, -120.842947	35.326	-120.843
Identification of Light-Harvesting Chlorophyll a/b-Binding Protein Genes of Zostera marina L. and Their Expression Under Different Environmental Conditions	Fanna et al. 2016	2016	2021-10-06	James Roe	Mesocosm	Manipulative			marina		Huiquan Bay, Qingdao, China	36 ̊3 ́4.07 ́ ́N, 120 ̊20 ́24.14 ́ ́E	36.0511	120.34	Light	Temperature	Acidification	Salinity	Plant	Physiological Measures
Identifying core features of adaptive metabolic mechanisms for chronic heat stress attenuation contributing to systems robustness	J. Gu et al. 2012	2012	2022-06-11	Emma Guerrini Romano	Mesocosm	Manipulative			marina	noltii	Hals, Denmark		56.9849	10.3242	Temperature				Plant	Physiological Measures	Photosynthetic Output	Growth													43.969	12.7561
Identifying the source of nutrient contamination in a lagoon system	Wayland, Megson, Mudge, Newton	2008	2022-11-29	Hannnah Lyford	Field	Survey			noltii		Ria Formosa Lagoon, Portugal	37.0182° N, 8.0032° W	37.0182	-8.0032	Nutrients	Anthropogenic Use			Plant & Environment	Physiological Measures	Shoot Density							Water Column Nutrients
Impact of daily photosynthetic period on protein synthesis and carbohydrate stores in Zostera marina L. (eelgrass) roots: implications for survival in light-limited environments	Kraemer & Alberte 1995	1995	2022-04-23	Devin Ferguson	Mesocosm	Manipulative			marina		Del Monte Beach, Monterey Bay, CA		36.6219	-121.903	Light				Plant	Growth	Physiological Measures	Photosynthetic Output
Impact of eelgrass bed recovery and expansion on phytoplankton growth through nutrient competition	Wang et al.	2020	2023-01-27	Sarah Joy Bittick	Field	Survey	Model		marina		Hiroshima Bay		34.3056	132.346	Light	Nutrients			Plant, Community, & Environment	Shoot Survival				Chlorophyll A	Distribution			Water Column Turbidity	Water Column Nutrients	Water Column Temperature	Sediment Characteristics
Impact of eutrophication and river management within a framework of ecosystem theories	Marques, Nielsen, Pardal, Jorgensen, 2003	2003	2022-10-12	Hannah Lyford	Field	Survey			noltii		Mondego Estuary, Portugal	40°07'N 08°49'W	40.1167	-8.81667	Light	Salinity	Nutrients		Plant, Community, & Environment	Physiological Measures	Growth			Organismal Diversity	Distribution			Water Column Nutrients	Water Column Salinity
Impact of Eutrophication on the Seagrass Assemblages of the Mondego Estuary (Portugal)	Ansari, Cardoso, Dolbeth, Gill, Lanza, Pardal, & Rast	2011	2022-11-29	Hannnah Lyford	Field	Survey		Management	noltii		Mondego Estuary, Portugal	40°08'N, 8°50'W	40.1333	-8.83333	Light	Aquaculture Impacts	Nutrients	Anthropogenic Use	Plant, Community, & Environment	Physiological Measures	Shoot Density	Shoot Survival	Growth	Organismal Diversity	Macroalgae	Invertebrates	Distribution	Water Column Nutrients	Sediment Characteristics	Water Column Turbidity	Water Column Dissolved Oxygen
Impact of Feeding Activities of Epibenthic Amphipods on Surface-Fouling of Eelgrass Leaves	Howard 1982	1982	2021-06-21	Devin Ferguson	Mesocosm	Manipulative			tasmanica		intertidal mudlfats of Westernport Bay, newar Rhyll, Victoria, Australia	38°28'S 145°18'E	-38.4667	145.3	Invertebrates				Community					Epiphytes
Impact of kelp cultivation on the Ecological Status of benthic habitats and Zostera marina seagrass biomass	A. M. Walls et al. 2017	2017	2022-11-29	Emma Guerrini Romano	Field	Manipulative			marina		Ventry Harbour, County Kerry, Ireland		52.1137	-10.3556	Aquaculture Impacts				Plant, Community, & Environment	Growth				Invertebrates				Sediment Characteristics	Sediment Nutrients
Impact of shellfish farming autrophication on benthic macrophyte communities in the Thau lagoon, France	M. L. De Casabianca	1997	2022-06-12	Emma Guerrini Romano	Field	Survey			marina	noltii	Lagoon of Thau, near Montpellier, France		43.3488	3.57175	Aquaculture Impacts	Nutrients			Plant, Community, & Environment	Growth				Organismal Diversity				Sediment Characteristics	Water Column Turbidity
Impacts of a fuel oil spill on seagrass meadows in a subtropical port, Gladstone, Australia - The value of long-term marine habitat monitoring in high risk areas	Taylor and Rasheed	2011	2022-10-11	Sarah Joy Bittick	Field	Survey			capricornii		Calliope River and Friend Point (north of Fishermans Landing)		-23.8187	151.215	Toxins				Plant & Community	Growth				Seagrass competition	Distribution									South Fisherman's		-23.8151	151.178	North Fisherman's		-23.7968	151.167	Pelican Banks		-23.7792	151.29
Impacts of CO2 Enrichment on Productivity and LIfe Requirements of Eelgrass	Zimmermal et al. 1997	1997	2022-02-04	Devin Ferguson	Mesocosm	Manipulative			marina		Del Monte Beach in southern Monterey Bay, California		36.6028	-121.886	Light	Nutrients			Plant	Photosynthetic Output	Growth	Physiological Measures
Impacts of dugong foraging on seagrass habitats: observational and experimental evidence for cultivation grazing	Preen, 1995	1995	2022-09-05	Hannah Lyford	Field	Manipulative			capricorni		Moreton Bay, Queensland, Australia	27.5° S, 153.3 ° E	-27.5	153.3	Herbivory				Plant & Community	Shoot Density	Growth			Distribution	Seagrass competition
Impacts of groundwater discharge at Myora Springs (North Stradbroke Islan, Australia) on the phenolic metabolism of eelgrass, Zostera muelleri and grazing by the juvenile rabbitfish, Siganus fuscescens	T. Arnold et al. 2014	2014	2022-06-21	Emma Guerrini Romano	Mesocosm	Manipulative			mulleri		Myora Springs, North Stradbroke Island, Queensland, Australia		-7.51519	153.462	Acidification	Carbon			Plant, Community, & Environment	Physiological Measures				Invertebrates
Impacts of hypoxia on estuarine macroinvertebrate assemblages across a regional nutrient gradient	Coffin et al. 2018	2018	2021-10-06	James Roe	Field	Survey			marina		southern Gulf of St. Lawrence	46°19'31.3"N 62°18'53.7"W	46.3254	-62.3149	Oxygen	Nutrients			Community & Environment					Invertebrates	Organismal Diversity			Water Column Salinity	Water Column pH	Water Column Temperature	Sediment Characteristics
Impacts of submerging and emerging shorelines on various biota and indigenous alaskan harvesting patterns	Johnson et al.	2019	2023-01-19	Mehana Muranaka	Mesocosm	Manipulative			marina		SE alaska community of Yakutat		59.5842	-139.836	Habitat Fragmentation				Plant & Community	Growth	Shoot Survival			Distribution	Invertebrates	Macroalgae								Hoonah		58.142	-135.509	angoon		57.4516	-134.594	kake		56.9738	-134.023	klawock		55.5393	-133.121
Impacts of Temperature and Nutrients on Coastal Lagoon Plant Communities	Bintz et al. 2003	2003	2021-06-14	Devin Ferguson	Mesocosm	Manipulative			marina		Ninigret Lagoon, Rhode Island, United States	41°21'N 71°40'W	41.35	-71.6667	Temperature	Nutrients			Plant, Community, & Environment	Shoot Density	Growth			Macroalgae	Distribution	Epiphytes		Water Column Nutrients						Point Judith Lagoon, Rhode Island, United States	41°23'N 71°30'W	41.3833	-71.5	University of Rhode Island Graduate School of Oceanography, Narrangansett Bay, Rhode Island, United States	41°N 71°W	41	-71
Impacts of urban wastewater discharge on seagrass meadows (Zostera noltii)	Cabaco et al. 2008	2008	2021-06-14	James Roe	Field	Survey			noltii		Ria Formosa lagoon, Southern coast of Portugal	37°01'12.8"N 7°56'59.5"W	37.0202	-7.94986	Anthropogenic Use				Plant, Community, & Environment	Shoot Density	Physiological Measures			Macroalgae	Epiphytes			Water Column Nutrients	Sediment Nutrients	Sediment Characteristics
Impacts of Varying Estuarine Temperature and Light Conditions on Zostera marina (Eelgrass) and its Interactions With Ruppia maritima (Widgeongrass)	Kenneth A. Moore et al. 2014	2014	2022-05-23	Sadie Kenny	Field	Survey			marina		York River Estuary, Chesapeake Bay		37.25	-76.4833	Light	Temperature			Community & Environment					Distribution	Macroalgae			Water Column Turbidity	Water Column Salinity	Water Column pH
Impacts on the seagrass, Zostera nigricaulis, from the herbicide Fusilade Forte (R) used in the management of Spartina anglica infestations	Carve et al.	2018	2022-10-10	Sarah Joy Bittick	Mesocosm	Manipulative			nigricaulis		St. Leonards, VIC, Australia (38°11′36.07″ S, 144°42′40.54″ E)		-38.1934	144.711	Herbicides				Plant	Photosynthetic Output	Physiological Measures
Implications of nutrient decline in the seagrass ecosystem success	Cardoso, Leston, Grilo, Bordalo, Crespo, Raffaeli, & Pardal	2010	2022-11-30	Hannnah Lyford	Field	Manipulative			noltii		Mondego Estuary, Portugal	40°08′N, 8°50′W	40.1333	-8.83333	Nutrients	Anthropogenic Use			Plant, Community, & Environment	Physiological Measures	Shoot Density	Growth		Distribution	Macroalgae	Organismal Diversity	Invertebrates	Water Column Nutrients	Water Column Turbidity
Implications of nutrient enrichment for the conservation and management of seagrass Zostera muelleri meadows	Li et al.	2019	2022-10-11	Sarah Joy Bittick	Field	Manipulative			mulleri		Tauranga Harbour on the North Island ofNew Zealand,	37°40′S, 176°10′E	-37.6667	176.167	Nutrients				Plant, Community, & Environment	Shoot Density	Growth	Physiological Measures		Chlorophyll A				Sediment Characteristics	Sediment Nutrients
In situ impact of petrochemicals on the photosynthesis of the seagrass Zostera capricorni	Macinnis-Ng and Ralph 2003	2003	2021-06-15	James Roe	Mesocosm	Manipulative			capricornii		Paradise Beach, NSW, Australia	151°19.0 E, 33°35.0 S	-33.5833	151.317	Anthropogenic Use				Plant	Photosynthetic Output	Physiological Measures
In vitro experimental assessment of the grazing pressure of two gastropods on Zostera marina L. ephiphytic algae	Hily et al. 2004	2004	2021-06-16	James Roe	Mesocosm	Manipulative			marina		Brest Bay, France	48°22'07.4"N 4°30'55.4"W	48.3687	-4.51539	Herbivory				Community					Epiphytes
Increase in seagrass distribution at Bourgneuf Bay (France) detected by spatial remote sensing	Barilléa, Robin, Harin, Bargain, & Launeau	2010	2022-11-26	Hannnah Lyford	Field	Survey			noltii		Bourgneuf Bay, France	47°0′N, 2°10′W	47	-2.16667	Anthropogenic Use	Light	Hydrodynamics		Plant, Community, & Environment	Growth	Shoot Density			Distribution				Sediment Characteristics	Sediment Nutrients	Water Column Turbidity
Increased macrophyte nitrate reductase activity as a consequence of groundwater input of nitrate through sandy beaches	Maier & Pregnall 1990	1990	2022-03-22	Devin Ferguson	Mesocosm	Manipulative			marina		Lackey's Bay, Woods Hole Massachussetss, USA		41.5008	-70.7027	Nutrients				Plant, Community, & Environment	Physiological Measures				Macroalgae				Water Column Nutrients	Water Column Salinity					Great Harbor, Woods Hole, Massachussetts, USA		41.526	-70.6797
Increased vulnerability of Zostera noltii to stress caused bylow light and elevated ammonium levels under phosphatedeficiency	Fernando G. Brun et al. 2008	2008	2021-06-08	Sadie Kenny	Mesocosm	Manipulative			noltii		Intertidal muddy beds at Los Torunos, Cadiz Bay Natural Park	36° 30' N, 6° 10' W	36.5	-6.16667	Light	Nutrients			Plant	Growth	Shoot Density	Photosynthetic Output	Physiological Meaures
Increasing density of juvenile Atlantic (Gadus morhua) and Greenland cod (G. ogac) in association with spatial expansion and recovery of eelgrass (Zostera marina) in a coastal nursery habitat	Warren et al.	2010	2022-12-05	Sarah Joy Bittick	Field	Manipulative			marina		Newman Soung, Bonavista Bay Newfoundland Canada		48.5587	-53.9613	Habitat Fragmentation				Plant & Community	Growth				Distribution	Organismal Diversity
Increasing temperature induces shorter leaf life span in an aquatic plant	Shinya Hosokawa et al. 2009	2009	2022-05-26	Sadie Kenny	Mesocosm	Survey			marina		Port and Airport Research Institute located on Kurihama Bay at the mouth of Tokyo Bay	35º13'N, 139º43'W	35.2167	139.717	Light	Temperature			Plant	Growth				Epiphytes
Indication of visitor trampling impacts on intertidal seagrass beds in a New Zealand marine reserve	Travaille et al.	2015	2022-10-05	Sarah Joy Bittick	Field	Survey			marina		Stingray Bay, New Zealand		-36.8313	175.793	Anthropogenic Use				Plant	Shoot Density
Indirect effects of predators control herbivore richness and abundance in a benthic eelgrass (Zostera marina) mesograzer community	Sarah L. Amundrud et al. 2015	2015	2022-05-19	Sadie Kenny	Field	Manipulative			marina		Subtital eelgrass meadow by Fred Gingell Park in Tsawwassen, BC, Canada	49º 1'N, 123º 5'W	49.0167	-123.083	Nutrients	Invertebrates			Community & Environment					Organismal Diversity	Invertebrates			Water Column Nutrients
Individual and population plasticity of the seagrass Zostera noltii along a vertical intertidal gradient	Cabaco et al. 2009	2009	2021-06-16	James Roe	Field	Survey			noltii		Ria Formosa lagoon, southern coast of Portugal	37°01' N, 7°50' W	37.0167	-7.83333	Light	Hydrodynamics			Plant, Community, & Environment	Shoot Density	Physiological Measures	Growth	Reproductive Output	Epiphytes				Sediment Characteristics	Sediment Nutrients	Water Column Nutrients	Water Column Temperature
Individual and population indicators of Zostera japonica respond quickly to experimentaladdition of sediment-nutrient and organic matter	Qiuying Han et al. 2016	2016	2022-06-17	Sadie Kenny	Field	Manipulative			japonica		Swan lake, a shallow coastal lagoon located in the eastern part of Shandong peninsula, northern Yellow Sea of China	N36°43′–37°27′, E122°09′–122°42′	36.7167	122.15	Nutrients	Carbon	Sediment		Plant	Physiological Meaures	Growth	Shoot Density
Influence of different types of sessile epibionts on the community structure of mobile invertebrates in an eelgrass bed	Momota and Nakaoka	2017	2022-10-03	Sarah Joy Bittick	Field	Survey			marina		Akkeshi-ko estuary		43.0658	144.909	Invertebrates	Temperature	Salinity		Plant, Community, & Environment	Shoot Density				Invertebrates	Organismal Diversity	Epiphytes		Water Column Temperature	Water Column Salinity
Influence of environmental disturbances and reproductive strategy on genetic diversity and differentiation of Zostera marina populations on the southern coast of Korea	Young Kyun Kim et al.	2018	2022-12-10	Mehana Muranaka	Field	Survey			marina		Jindong bay		35.0851	128.521	Genomics				Plant	Reproductive Output	Shoot Survival													Kosung Bay		34.9319	128.322	Gamak bay		34.7009	127.668	Koje bay		34.8245	128.567
Influence of environmental stressors and grazer immigration on ecosystem properties of an experimental eelgrass community	Blake & Duffy 2016	2016	2021-11-30	Devin Ferguson	Mesocosm	Manipulative			marina		Virginia Institute of Marine Science, Gloucester Point, Virginia, USA		32.2477	-76.5008	Herbivory	Temperature	Light		Plant & Community	Growth				Epiphytes	Organismal Diversity	Macroalgae	Invertebrates
Influence of Neighboring Plants on Shading Stress Resistance and Recovery of Eelgrass, Zostera marina L	Camilla Gustafsson & Christoffer Bostrom 2013	2013	2022-10-02	Sadie Kenny	Field	Manipulative			marina		Faro Island, Archipelago Sea, SW Finland.	59° 55.219’ N, 21° 47.711’ E	59.9203	21.7952	Light				Plant & Environment	Growth	Physiological Measures							Sediment Nutrients	Water Column Nutrients
Influence of New Zealand cockles (Austrovenus stutchburyi) on primary productivity in sandflat-seagrass (Zostera muelleri) ecotones	Lohrer et al.	2016	2022-09-28	Sarah Joy Bittick	Field	Manipulative			mulleri	muelleri	Tapora Bank, a diverse intertidal flat located in the centre of Kaipara Harbour	S 36_x0014_ 23.5700 E 174_x0014_17.5130	-36.3928	174.292	Invertebrates				Plant, Community, & Environment	Shoot Density	Physiological Measures			Chlorophyll A	Invertebrates	Organismal Diversity		Sediment Characteristics	Water Column Dissolved Oxygen	Water Column Nutrients
Influence of Regional Water Temperature Variability on the Flowering Phenology and Sexual Reproduction of the Seagrass Zostera marina in Korean Coastal Waters	Qin et al. 2020	2020	2021-06-09	Devin Ferguson	Field	Survey			marina		Duksan Harbor, Korea	37°21'N 129°13'E	37.35	129.217	Temperature				Plant & Environment	Shoot Density	Growth	Reproductive Output						Water Column Temperature	Water Column Nutrients	Sediment Nutrients				Bangeojin Harbor, Korea	35°28'N 129°25'E	35.4667	129.417	Jindong Bay, Korea	35°07'N 128°29'E	35.1167	128.483	Koje Bay, Korea	34°48'N 128°35'E	34.8	128.583
Influence of seagrasses on water quality in shallow regions of the lower Chesapeake Bay	Moore	2004	2022-11-21	Hannah Lyford	Field	Survey			marina		Lower Chesapeake Bay, Virginia, USA	37'12 N, 76' 23 W	37.2	-76.3833	Light	Nutrients	Sediment		Plant, Community, & Environment	Physiological Measures	Growth	Shoot Density		Organismal Diversity	Distribution	Epiphytes		Water Column Nutrients	Water Column Turbidity	Water Column Temperature	Sediment Characteristics
Influence of temperature and salinity on germination of eelgrass (Zostera marina L.) seeds	Pan Jinhua et al. 2011	2011	2021-06-18	Sadie Kenny	Mesocosm	Manipulative			marina		Sanggou Bay, Rongcheng, Shandong Province	37° 2.2' N, 122° 32.7' E	37.0367	122.545	Temperature	Salinity			Plant	Growth
Influence of the mud shrimp Upogebia pusilla (Decapoda: Gebiidea) on solute and porewater exchanges in an intertidal seagrass (Zostera noltei) meadow of Arcachon Bay: An experimental a	Ludovic Pascal et al. 2016	2016	2022-06-21	Sadie Kenny	Mesocosm	Manipulative			noltii		Arcachon Bay, along the French Atlantic coast (vegetated intertidal mudflat located in the middle part of the bay)	44°40.782′ N, 1° 08.321′ W	44.6797	-1.13868	Invertebrates				Environment									Sediment Characteristics	Sediment Nutrients	Water Column Nutrients	Water Column Dissolved Oxygen
Influence of Water Temperature Anomalies on the Growth of Zostera marina Plants Held Under High and Low Irradiance Levels	Kim et al. 2020	2020	2021-06-09	Devin Ferguson	Mesocosm	Manipulative			marina		Koje Bay off southern coast of Korea	34°48'N 128°35'E	34.8	128.583	Temperature	Light			Plant	Shoot Density	Growth
Inorganic carbon sources for seagrass photosynthesis: an experimental evaluation of bicarbonate use in species inhabitating temperate waters	O. Invers et al. 2001	2001	2022-10-01	Emma Guerrini Romano	Mesocosm	Manipulative			marina		Monterey Bay, CA, USA		36.863	-121.824	Carbon	Acidification			Plant & Environment	Photosynthetic Output								Water Column pH
Inorganic nitrogen has a dominant impact on estuarine eelgrass distribution in the Southern Gulf of St. Lawrence, Canada	Heuvel et al. 2019	2019	2021-06-17	James Roe	Field	Survey			marina		Southern Gulf of St. Lawrence	46°21'37.8"N 63°48'35.6"W	46.3605	-63.8099	Anthropogenic Use				Plant, Community, & Environment	Growth				Chlorophyll A				Water Column Turbidity	Water Column Temperature	Water Column Salinity	Water Column Nutrients
Inorganic nitrogen uptake and related enzymatic activity in the seagrass Zostera noltii	Alexandre et al. 2010	2010	2021-06-25	James Roe	Mesocosm	Manipulative			noltii		Ria Formosa coastal lagoon, South Portugal	37°01'05.4"N 8°00'10.8"W	37.0182	-8.003	Nutrients				Plant	Physiological Measures
Inorganic nitrogen uptake kinetics and whole-plant nitrogen budget in the seagrassZostera noltii	Ana Alexandre et al. 2011	2011	2021-06-21	Sadie Kenny	Mesocosm	Manipulative			noltii		Ria Formosa Lagoon, Southern Portugal	37° 00' 18" N, 7° 58' 01" W	37.005	-7.98778	Nutrients					Plant	Physiological Meaures	Shoot Density
Insights into the cause of an Ulva lactuca LInnaeus bloom in the Knysna Estuary	L. R. D. Human et al. 2016	2016	2022-11-03	Emma Guerrini Romano	Field	Survey			capensis		Knysna Estuary, South Africa		-34.0431	23.0543	Seagrass competition	Nutrients								Distribution				Sediment Characteristics	Water Column Nutrients
Integrated ecological assessment of Danish Baltic Sea coastal areas by means of phytoplankton and macrophytobenthos	Sagaert et al.	2005	2022-11-29	Sarah Joy Bittick	Field	Survey			marina		The initial data set consisted of 227 sites (999 samplings) for Zostera marina (1989–1994) along the Danish Baltic coast		55.7937	10.0875	Nutrients	Salinity			Community & Environment					Chlorophyll A	Distribution	Organismal Diversity		Water Column Nutrients	Water Column Salinity	Water Column Turbidity
Integrating edge effects into studies of habitat fragmentation: a test using meiofauna in seagrass	Warry et al.	2009	2022-10-03	Sarah Joy Bittick	Field	Manipulative			nigricaulis		(Grassy Point: 38°07_x0001_S; 144°41_x0001_E) of Port Phillip Bay		-38.1167	144.683	Habitat Fragmentation				Community					Invertebrates	Organismal Diversity
Integrating Scales of Seagrass Monitoring to Meet Conservation Needs	Kopp, Neckles, Peterson & Pooler	2012	2022-12-01	Hannnah Lyford	Field	Survey		Management	marina		Little Pleasant Bay, MA, USA	41.750208 N, -69.963435 W	41.7502	-69.9634	Nutrients	Anthropogenic Use	Hydrodynamics		Plant, Community, & Environment	Shoot Density	Growth	Physiological Measures		Distribution	Organismal Diversity			Water Column Turbidity	Water Column Nutrients					Great South Bay, NY, USA	40.689524 N, -73.147655 W	40.6895	-73.1477
Interaction between ammonium and phosphate uptake rates in the seagrass Zostera noltii	B. Villazán et al. 2013	2013	2022-05-18	Emma Guerrini Romano	Mesocosm	Manipulative			noltii		Los Toruños in Cádiz Bay Natural Park, Spain		36.5	-6.16667	Nutrients				Plant	Physiological Measures								Water Column Nutrients
Interaction between Ammonium Toxicity and Green Tide Development Over Seagrass Meadows: A Laboratory Study	Moreno-Marin et al. 2016	2016	2021-06-23	James Roe	Mesocosm	Manipulative			noltii		Santibáñez intertidal mudflats Cádiz Bay Natural Park Spain	36° 28’ N, 6° 15’ W	36.4667	-6.25	Light	Nutrients			Plant, Community, & Environment	Growth				Chlorophyll A				Water Column pH	Water Column Salinity	Water Column Dissolved Oxygen	Water Column Temperature	Shoot Mortality
Interaction between hydrodynamics and seagrass canopy structure: Spatially explicit effects on ammonium uptake rates	Morris et al. 2008	2008	2021-06-11	James Roe	Mesocosm	Manipulative			noltii		Santiban ̃ ez, Ca ́ diz, in southwest Spain	36°28'12.79" N, 06°15'7.07" W	36.4702	-6.25196	Aquaculture Impacts				Plant & Environment	Physiological Measures								Water Column Nutrients
Interaction of high seawater temperature and light intensity on photosynthetic electron transport of eelgrass( Zostera marina L.)	Yang et al. 2018	2018	2021-06-18	James Roe	Mesocosm	Manipulative			marina		Changdao, Shandong province, China	37° 9.1′N, 120° 7.3′E	37.1517	120.122	Light	Temperature			Plant	Physiological Measures	Photosynthetic Output
Interactions between seagrasses and burrowing ghost shrimps and their influence on infaunal assemblages	Berkenbusch et al.	2007	2022-10-12	Sarah Joy Bittick	Field	Manipulative			japonica	capricorni	Netarts Bay, OR		45.409	-123.938	Invertebrates				Plant, Community, & Environment	Shoot Density				Chlorophyll A	Invertebrates	Organismal Diversity		Sediment Characteristics						Papanui Inlet		-45.8508	170.69
Interactions between two introduced species: Zostera japonica (dwarf eelgrass) facilitates itself and reduces condition of Ruditapes philippinarum (Manila clam) on intertidal flats	Tsai et al. 2010	2010	2021-06-10	James Roe	Field	Manipulative			japonica		Leadbetter Point State Park, Willapa Bay, Washington, USA	46.60893° N, 124.03571° W	46.6089	-124.036	Aquaculture Impacts				Plant & Environment	Growth								Sediment Nutrients	Water Column Turbidity
Interactions of light and organic matter under contrasting resource simulated environments: the importance of clonal traits in the seagrass Zostera noltii	Irene Olive ́ et al. 2009	2009	2022-05-28	Sadie Kenny	Mesocosm	Manipulative			noltii		Intertidal sandy meadow at Santiban ̃ez (Cadiz Bay Natural Park)	36°32' N, 6°15'W	36.5333	-6.25	Light	Nutrients			Plant	Growth	Photosynthetic Output	Physiological Meaures
Interactive effects of co-occurring anthropogenic stressors on the seagrass, Zostera noltei	Vieira et al. 2020	2020	2021-06-09	Devin Ferguson	Field	Manipulative			noltii		Ria de Aveiro, Portugal	40°38'N 08°45'W	40.6333	-8.75	Anthropogenic Use	Nutrients	Sediment	Invasion	Plant, Community, & Environment	Growth	Shoot Density			Macroalgae				Water Column Nutrients
Interactive Effects of Seagrass and the Microphytobenthos on Sediment Suspension Within Shallow Coastal Bays	Reidenbach and Timmerman	2019	2023-02-06	Sarah Joy Bittick	Field	Survey			marina		Delmarva Peninsula, Virginia		37.2587	-75.8484	Sediment	Hydrodynamics			Plant, Community, & Environment	Shoot Density				Chlorophyll A				Sediment Characteristics	Water Column Turbidity	Water Column Temperature	Water Column Dissolved Oxygen
Interannual variance in a subtidal eelgrass community	Nelson, 1996	1996	2022-05-30	Hannah Lyford	Field	Survey			marina		Brown Island, Friday Harbor, Washington, USA	48°32'11"N, 122°59'27"W	48.5364	-122.991	Temperature	Light	Nutrients	Hydrodynamics	Plant, Community, & Environment	Shoot Density				Invertebrates	Epiphytes			Water Column Nutrients	Water Column Temperature	Water Column Turbidity		Hydrodynamic stressor for this article associated with El Nino weather pattern
Interannual variation in submerged aquatic vegetation and its relationship to water quality in subestuaries of Chesapeake Bay	Patrick & Weller	2015	2022-12-22	Hannah Lyford	Field	Survey			marina		Chesapeake Bay, VA, USA	37.5214° N, 76.1050° W	37.5214	-76.105	Light	Salinity	Hydrodynamics	Nutrients	Community & Environment					Organismal Diversity	Chlorophyll A	Distribution	Macroalgae	Water Column Salinity	Water Column Turbidity	Sediment Characteristics	Water Column Nutrients
Intra-Meadow Variation in Seagrass Flowering Phenology Across Depths	von Staats et al. 2021	2021	2021-05-19	Devin Ferguson	Field	Survey			marina		Curlew Beach, Nahant, MA	42°25'15.3"N 70°54'55.1"W	42.4209	-70.9153	Light	Temperature			Plant & Environment	Shoot Density	Growth	Reproductive Output						Water Column Temperature						West Beach, Beverly, MA	42.5612°N 70.8064° W	42.5612	-70.8064	Lynch Park, Beverly, MA	42°32'48.7"N 70°51'38.5"W	42.5469	-70.8607	Niles Beach, Gloucester, MA	42°35'45.6"N 70°39'18.2"W	42.596	-70.6551
Intraspecific variability of Zostera marina L. (eelgrass) in the estuaries and lagoons of the southwestern Netherlands. II. Relation with environmental factors	Lent & Verschuure, 1994	1994	2022-04-10	Hannah Lyford	Field	Survey			marina		Grevelingen Lagoon, Netherlands	51.708497166 N 4.01999992 E	51.7085	4.02	Light	Temperature	Nutrients	Salinity	Plant, Community, & Environment	Physiological Measures	Growth	Shoot Density	Growth	Chlorophyll A	Distribution			Water Column Temperature	Water Column Salinity	Water Column Turbidity	Water Column Nutrients	Additional Environmental Response Variables: Sediment Characteristics, Sediment Nutrients		Veerse Meer Lagoon, Netherlands	51.5506° N, 3.8892° E	51.5506	3.8892	Zandkreek Estuary, Netherlands	51.5450° N, 3.8100° E	51.545	3.81
Irradiance Reduction: Effects on Standing Crops of the Eelgrass Zostera marina in a Coastal Lagoon	Backman & Barilotti 1976	1976	2021-05-24	Devin Ferguson	Field	Manipulative			marina		Agua Hedionda Lagoon, Carlsbad, California	33°08'54.4"N 117°19'58.4"W	33.1484	-117.333	Light				Plant	Growth
Is black swan grazing a threat to seagrass? Indications from an observational studyin New Zealand	Virginie M. Dos Santos et al. 20112	2011	2021-06-19	Sadie Kenny	Field	Survey			mulleri		Tauranga Harbour, North Island of New Zealand	37° 27' S, 175° 56' E	-37.45	175.933	Herbivory				Plant	Growth	Shoot Density											Black swan grazers
Isotopic and Elemental Composition of Marine Macrophytes as Biotracers of Nutrient Recycling Within a Coastal Lagoon in Baja California, Mexico	José D. Carriquiry et al. 2016	2016	2022-12-09	Sadie Kenny	Field	Survey			marina		San Quintin Bay, Baja California (Mexico)	30° 27′ N, 115° 59′ W	30.44	-115.98	Nutrients				Plant	Physiological Measures
Isotopic signatures of eelgrass (Zostera marina L.) as bioindicator of anthropogenic nutrient input in the western Baltic Sea	Philipp R. Schubert et al. 2013	2013	2022-10-02	Sadie Kenny	Field	Survey			marina		Heiligenhafen Bay of Kiel Bight in the western Baltic Sea, northern Germany		54.3837	10.9751	Nutrients				Plant, Community, & Environment	Physiological Measures	Shoot Density	Growth		Distribution	Epiphytes			Water Column Turbidity
Juvenile Chinook Salmon and Forage Fish Use of Eelgrass Habitats in a Diked and Channelized Puget Sound River Delta	Rubin et al.	2018	2022-10-04	Sarah Joy Bittick	Field	Survey			marina		Skagit River Delta, Washington		48.3093	-122.5	Habitat Fragmentation				Plant, Community, & Environment	Shoot Density				Organismal Diversity				Water Column Temperature	Water Column Salinity
Large-Scale Differences in Community Structure and Ecosystem Services of Eelgrass (Zostera marina) Beds Across Three Regions in Eastern Canada	Mamba et al.	2018	2022-10-08	Sarah Joy Bittick	Field	Survey			marina		Franks Gorge, Nova Scotia	N 44.60, W 63.90	44.6	-63.9	Temperature	Salinity	Carbon		Plant, Community, & Environment	Shoot Density	Physiological Measures			Epiphytes	Organismal Diversity	Invertebrates	Chlorophyll A	Water Column Nutrients						New Brunswick	N 46.84, W 64.94	46.84	-64.94	PEI 1	N 46.66, W 63.91	46.66	-63.91	NS 2	N 44.74, W 62.80	44.74	-62.8	NB 2	N 47.37, W 64.94	47.37	-64.94
Latitudinal Patterns in European Seagrass Carbon Reserves: Influence of Seasonal Fluctuations versus Short-Term Stress and Disturbance Events	Soissons et al	2018	2023-01-16	Hannah Lyford	Field	Manipulative			noltii		Cadiz, Spain	36.518586, -6.291050	36.5186	-6.29105	Light	Nutrients	Anthropogenic Use	Temperature	Plant, Community, & Environment	Physiological Measures	Shoot Density	Shoot Survival		Distribution	Macroalgae			Water Column Turbidity	Water Column Nutrients	Sediment Characteristics	Water Column Temperature			Bidasoa Estuary, France	43.600355, -1.403623	43.6004	-1.40362	Mondego Estuary, Portugal	40°07'N 08°49'W	40.1167	-8.81667	The Oosterschelde, Netherlands	51.568202, 3.936761	51.5682	3.93676	Sylt, Germany	54.916095, 8.287336	54.9161	8.28734
Leaf dynamics and production of a Zostera marina bed near its southern distributional limit	C. Bourdouresque et al. 1997	1997	2022-05-18	Emma Guerrini Romano	Field	Survey			marina		San Quintin Bay (Bahia Falsa), Baja California, Mexico	30°29'N 115°57'W	29.4833	-115.95	Temperature	Salinity	Nutrients	Light	Plant	Growth	Physiological Measures
Leaf dynamics and standing stocks of intertidal Zostera noltii Hornem. and Cymodocea nodosa (Ucria) Ascherson on the Banc d'Arguin (Mauritania)	Vermaat et al., 1993	1993	2022-04-10	Hannah Lyford	Field	Survey & Manipulative			noltii		Baie d'Aouatif, Mauritania, Africa	19.8833 N, -16.2667 W	19.8833	-16.2667	Light				Plant	Shoot Density	Growth
Leaf growth and population dynamics of intertidal Zostera japonica on the western coast of Korea	Sang Yong Lee et al. 2005	2005	2021-06-07	Sadie Kenny	Field	Survey			japonica		Seungbong Island intertidal zone, western coast of Korea	37° 09' N, 126° 17' E	37.15	126.283	Nutrients	Temperature	Light		Plant	Shoot Density	Growth	Reproductive Output						Sediment Characteristics	Sediment Nutrients	Water Column Salinity
Leaf-root interaction in the uptake of ammonia by Zostera marina	G. B. Thursby et al. 1982	1982	2022-05-28	Emma Guerrini Romano	Mesocosm	Manipulative			marina		North shore of west basin of Ninigret Pond, Rhode Island, USA		41.3581	-71.6877	Nutrients				Plant	Physiological Measures
Lessons learnt from a comparison of three ecosystem models for Port Phillip Bay, Australia	Fulton & Smith, 2004	2004	2022-10-22	Hannah Lyford			Model	Management	mulleri	tasmanica	Port Phillip Bay, Victoria, Australia	38°09' S, 144°52' E	-38.15	144.867	Nutrients	Anthropogenic Use	Aquaculture Impacts		Plant, Community, & Environment	Shoot Density	Growth	Shoot Survival		Distribution	Organismal Diversity	Invertebrates	Chlorophyll A	Water Column Nutrients	Sediment Nutrients
Lethal and sub-lethal chronic effects of the herbicide diuron on seagrass	Negri et al.	2015	2022-10-05	Sarah Joy Bittick	Mesocosm	Manipulative			mulleri		Cockle Bay Magnetic Island (19° 10.88′S, 146° 50.63′E)		-19.1813	146.844	Herbicides				Plant	Photosynthetic Output	Growth	Physiological Measures	Shoot Survival
Life history and morphological shifts in an intertidal seagrass following multiple disturbances	Ruesink et al.	2012	2022-10-10	Sarah Joy Bittick	Field	Manipulative			marina		Mill channel, willapa bay	46.470595°N, 124.020791°W	46.4706	-124.021	Habitat Fragmentation				Plant	Growth	Shoot Density	Reproductive Output												Peterson Station	46.43764°N, 124.00729°W	46.4376	-124.007
Light dependence of Zostera marina annual growth dynamics in estuaries subject to different degrees of eutrophication	Hauxwell et al. 2006	2006	2021-11-09	Devin Ferguson	Field	Survey			marina		Timms estuary, Waquoit Bay, Massachussetts		41.553	-70.54	Light	Nutrients			Plant	Shoot Density	Growth													Hamblin estuary, Waquoit Bay, Massachussetts		41.576	-70.505	Sage Lot estuary, Waquoit Bay, Massachussetts		41.554	-70.508	Jehu Ponds estuary		41.566	-70.499
Light indirectly mediates bivalve habitat modification and impacts on seagrass	Max C.N. Castorani et al.	2015	2022-11-10	Mehana Muranaka	Mesocosm	Manipulative			marina		Svenstrup beach in western funen denmark		55.4678	9.75283	Light	Invertebrates			Plant, Community, & Environment	Growth	Shoot Survival	Physiological Measures		Macroalgae				Sediment Nutrients
Light intensity dependent photosynthetic electron transport in eelgrass (Zostera marina L.)	Xiao Qi Yang et al. 2017	2017	2022-06-24	Sadie Kenny	Mesocosm	Manipulative			marina		Changdao, Yantai, Shandong province, China	37°91'N, 120° 73' E	38.5167	121.217	Light				Plant	Physiological Meaures	Photosynthetic Output
Light penetration in a temperate meso-tidal lagoon: Implications for seagrass growth and dredging in Tauranga Harbour, New Zealand	Cussioli et al	2019	2023-01-16	Hannah Lyford			Model	Management	mulleri		Tauranga Harbour, New Zealand	-37.700171, 176.176083	-37.7002	176.176	Anthropogenic Use	Sediment	Light		Plant, Community, & Environment	Shoot Density	Physiological Measures	Photosynthetic Output		Chlorophyll A				Water Column Turbidity	Sediment Characteristics	Water Column Dissolved Oxygen	Sediment Nutrients
Light Requirements for Growth and Survival of Eelgrass (Zostera marina L.) in Pacific Northwest (USA) Estuaries	Thom & Southard 2008	2008	2022-01-21	Devin Ferguson	Field	Manipulative			marina		Puget Sound, Washington		47.7151	-122.463	Light	Anthropogenic Use			Plant	Growth	Shoot Density	Photosynthetic Output												Strait of Juan de Fuca, Sequim Bay, Washing		48.2504	-123.346	Willapa Bay, Washington		46.5355	-123.988	Coos Bay, Oregon		43.4296	-124.23
Light requirements of the seagrass, Zostera muelleri, determined by observations at the maximum depth limit in a temperate estuary, New Zealand	RH Bulmer et al. 2016	2016	2022-06-14	Sadie Kenny	Field	Survey			mulleri		Intertidal sandbank in the southern arm of the Kaipara Harbour, New Zealand	36°25’41.39”S, 174°18’46.70”E	-36.4282	174.313	Light				Plant & Community	Growth	Shoot Density			Distribution
Light Stress Responses by the Eelgrass, Zostera marina	CM Bertelli and R Unsworth	2018	2022-09-30	Carolina Salcedo	Mesocosm	Manipulative			marina		Durgan, Helford River, UK, A low spring tide from across shallow subtidal meadow	50° 6' 27" N 5° 06' 54.70" W	50.1075	5.11519	Light				Plant	Growth	Shoot Density
Light Thresholds to Prevent Dredging Impacts on the Great Barrier Reef Seagrass, Zostera muelleri ssp. capricorni	Chartrand et al. 2016	2016	2021-06-18	James Roe	Field	Manipulative			mulleri		Pelican Banks, Gladstone Harbour, Australia	151° 18′ 30′′ E, 23° 45′ 58′′ S	-23.7661	151.308	Light				Plant & Environment	Shoot Density	Growth							Water Column Temperature
Light requirements for successful restoration of eelgrass (Zostera marina L.) in a high latitudeenvironment - Acclimatization, growth and carbohydrate storage	Louise Eriander 2017	2017	2022-10-23	Sadie Kenny	Mesocosm	Manipulative			marina		Gullmars fjord, on the west coast of Sweden		58.2618	11.4935	Light	Temperature			Plant	Growth	Physiological Measures
Limited coupling of macrophyte production and bacterial carbon cycling in the sediments of Zostera spp. meadows	Boschker et al.	2000	2022-10-13	Sarah Joy Bittick	Mesocosm	Manipulative			marina	noltii	Sliphaven		55.2878	10.8242	Microbiome	Sediment			Plant, Community, & Environment	Physiological Measures				Macroalgae	Microbial Diversity			Sediment Characteristics	Sediment Nutrients					Arcachon Harbor, France		44.6642	-1.14928	macro-tidal Sint Annaland salt marsh, Eastern Scheld, The Netherlands		51.6154	4.09223
Linking eutrophication indicators in eelgrass habitats to nitrogen loading and mitigating site characteristics in eastern New Brunswick, Canada	McIver, Cullain, Schmidt, & Lotze	2019	2023-01-16	Hannah Lyford	Field	Survey			marina		Lameque, Gulf of St Lawrence, Canada	47.795420, -64.567892	47.7954	-64.5679	Aquaculture Impacts	Nutrients	Anthropogenic Use	Epiphytes	Plant, Community, & Environment	Shoot Density	Physiological Measures	Shoot Survival		Distribution	Macroalgae	Chlorophyll A	Organismal Diversity	Water Column Turbidity	Water Column Nutrients	Sediment Nutrients	Water Column Dissolved Oxygen			Baie St Simon Sud, Gulf of St Lawrence, Canada	47.712393, -64.687799	47.7124	-64.6878	Cocagne, Gulf of St Lawrence, Canada	46.335168, -64.609946	46.3352	-64.6099	Tabusintac, Gulf of St Lawrence, Canada	47.329814, -64.988001	47.3298	-64.988	Kouchibouguac, Gulf of St Lawrence, Canada	46.815724, -64.970686	46.8157	-64.9707
Linking nitrogen in estuarine producers to land-derived sources	J. W. McClelland et al. 1998	1998	2022-10-07	Emma Guerrini Romano	Field	Survey			marina		Childs River, Waquoit Bay, Massachussets		41.5976	-70.5251	Nutrients				Plant & Environment	Physiological Measures								Water Column Nutrients	Water Column Turbidity					Sage Lot Pond		41.5539	-70.5096	Quashnet River		41.5745	-70.5168
Linking nitrogen sources utilised by seagrass in a temperate marine embayment to patterns of seagrass change during drought	Hirst et al.	2016	2022-10-08	Sarah Joy Bittick	Field	Survey			nigricaulis		Port Phillip Bay		-38.15	144.867	Drought	Nutrients			Plant	Physiological Measures
Living in the intertidal: dessication and shading reduce seagrass growth, but high salinity or population of origin have no additional effect	Wouter Suykerbuyk	2018	2022-12-02	Mehana Muranaka	Mesocosm	Manipulative			noltii		Goese Sas tidal flat, oosterschelde basin SW Netherlands		51.5529	3.95039	Light	Salinity			Plant	Growth	Shoot Survival											emergence period		sylt wadden sea, germany		54.9043	8.5408	saint-jacut brittany france		48.6178	-2.17751
Local Habitat and Seascape Structure Influence Seagrass Fish Assemblages in the Venice Lagoon: The Importance of Conservation at Multiple Spatial Scales	Scapin et al.	2018	2023-01-27	Sarah Joy Bittick	Field	Survey	Model		marina	noltii			45.3875	12.2647	Temperature	Oxygen	Light	Habitat Fragmentation	Community & Environment					Organismal Diversity	Distribution			Water Column Salinity	Water Column Temperature	Water Column Turbidity	Water Column Dissolved Oxygen
Local regime shifts prevent natural recovery and restoration of lost eelgrass beds along the swedish west coast	P. -O Moksnes et al.	2018	2022-12-02	Mehana Muranaka	Field	Manipulative			marina		southern part of swedish NW coast inside the island of Marstrand		57.9848	11.7425	Light	Sediment	Hydrodynamics		Plant, Community, & Environment	Growth	Shoot Survival			Distribution				Water Column Nutrients	Water Column Turbidity			wind
Long term changes in Zostera meadows in the Berre lagoon (Provence, Mediterranean Sea)	Bernard et al. 2007	2007	2021-11-15	Devin Ferguson	Field	Survey			marina		Berre lagoon, Provence, France		43.4547	5.10491	Sediment	Nutrients			Plant, Community, & Environment	Growth				Distribution				Water Column Turbidity	Water Column Salinity
Long-term analysis of Zostera noltei: A retrospective approach for understanding seagrasses' dynamics	Calleja et al	2017	2023-01-01	Hannah Lyford	Field	Survey		Management	noltii		Bay of Santander, Spain	43°26′00″ N, 03°48′00″ W	43.4333	-3.8	Light	Anthropogenic Use			Plant, Community, & Environment	Physiological Measures	Shoot Density			Distribution	Organismal Diversity	Chlorophyll A	Macroalgae	Water Column Turbidity	Water Column Nutrients	Water Column Salinity	Water Column Salinity
Long-term changes in aquatic vegetation associated with structural modification and altered hydrology in subtropical east Australian estuary	J. A. Phillips 2008	2008	2022-11-24	Emma Guerrini Romano	Field	Survey			capricornii		Currumbin Creek, Australia		-28.1288	153.482	Sediment	Habitat Fragmentation			Plant & Community	Growth				Distribution
Long-term changes in area distribution of eelgrass (Zostera marina) in Danish coastal waters	Morten Frederiksen et al. 2003	2003	2022-05-20	Sadie Kenny	Field	Survey			marina		Coastal areas of Kattegat and Oresund, Denmark		56.8167	9.13333	Pathogens	Anthropogenic Use	Hydrodynamics	Temperature	Community					Distribution
Long-term changes in the Zostera bed area in the Seto Inland Sea (Japan), especially along the coast of the Okayama Prefecture	Komatsu, 1997	1997	2022-05-30	Hannah Lyford	Field	Survey			marina	japonica	Harimanada Sea, Okayama Prefecture, Japan (Seto Inland Sea Region)	34.2338° N, 134.5514° E	34.2338	134.551	Nutrients	Light	Anthropogenic Use	Habitat Fragmentation	Plant, Community, & Environment	Shoot Density				Distribution				Water Column Turbidity	Water Column Nutrients						34.3622° N, 133.8258° E	34.3622	133.826	Bingo-Hiuchinada Sea, Okayama Prefecture, Japan (Seto Inland Sea Region)	33.9340° N, 133.1501° E	33.934	133.15	Akinada Sea(Hiroshima Bay), Okayama Prefecture, Japan (Seto Inland Sea Region)	34.2959° N, 132.3899° E	34.2959	132.39	Suonada Sea, Okayama Prefecture, Japan (Seto Inland Sea Region)	33.5781° N, 131.3395° E	33.5781	131.339
Long-term changes of a brackish-water eelgrass (Zostera marina L.) community indicate effects of coastal eutrophication	C. Bostrom et al. 2002	2002	2022-05-27	Sadie Kenny	Field	Survey			marina		Tva ̈rminne, SW Finland	59º50'N, 23º15'E	59.8333	23.25	Nutrients				Plant, Community, & Environment	Growth	Shoot Density			Distribution	Organismal Diversity			Water Column Temperature	Water Column Salinity	Sediment Characteristics
Long-term evolution (1988–2008) of Zostera spp. meadows in Arcachon Bay (Bay of Biscay)	Martin, Sebastien, Gilles, Isabelle, de Montaudouin, Emery, Claire, Christophe	2010	2022-11-30	Hannnah Lyford	Field	Survey			marina	noltii	Arcachon Bay, French Atlantic Coast	44°40 N, 1°10 W	44.6667	-1.16667	Nutrients	Sediment	Hydrodynamics	Anthropogenic Use	Plant, Community, & Environment	Growth	Shoot Density	Shoot Survival	Physiological Measures	Distribution	Organismal Diversity	Macroalgae	Chlorophyll A	Sediment Characteristics	Water Column Turbidity	Water Column Nutrients	Sediment Nutrients
Long-Term Field Study Reveals Subtle Effects of the Invasive Alga Sargassum muticum upon the Epibiota of Zostera marina	DeAmicis and Foggo	2015	2022-10-05	Sarah Joy Bittick	Field	Manipulative			marina		Woodville Rocks in the Salcombe-Kingsbridge drowned river valley, SW England (50°13′53″N, 03°46′18″W)		53.2314	-3.77167	Invasion				Plant & Community	Growth				Organismal Diversity	Epiphytes	Invertebrates
Long-term Patterns of Eelgrass (Zostera marina) Occurrence and Associated Herbivorous Waterbirds in a Danish Coastal Inlet	Thorsten J. S. Balsby et al. 2017	2017	2022-06-16	Sadie Kenny	Field	Survey			marina		Nibe-Gjøl Bredning, a broad of the Limfjorden estuarine complex in Denmark	57° 02′ N, 9° 37′ E)	57.0333	9.61667	Herbivory				Community					Distribution
Long-term reductions in anthropogenic nutrients link to improvements in Chesapeake Bay habitat	Ruhl & Rybicki	2010	2022-11-30	Hannnah Lyford	Field	Manipulative			marina		Potomac River, Chesapeake Bay, VA, USA	39.1953 N, -79.4911 W	39.1953	-79.4911	Nutrients	Light	Hydrodynamics		Plant, Community, & Environment	Physiological Measures	Growth	Shoot Density		Distribution	Organismal Diversity			Water Column Nutrients	Water Column Turbidity
Long-Term Trends in Submersed Aquatic Vegetation (SAV) in Chesapeake Bay, USA, Related to Water Quality	Orth et al.	2010	2022-12-05	Sarah Joy Bittick	Field	Survey			marina		lower chesapeake bay		37.1535	-76.3001	Salinity	Nutrients			Plant, Community, & Environment	Growth				Distribution				Water Column Nutrients	Water Column Turbidity	Water Column Salinity	Water Column Temperature
Losing a winner: thermal stress and local pressures outweigh the positive effects ofocean acidification for tropical seagrasses	Catherine J. Collier et al. 2018	2018	2021-06-07	Sadie Kenny	Mesocosm	Manipulative			mulleri		Midge Point, central Great Barrier Reef	20° 38′ 5.93″ S, 148° 42 ′6.5″ E	-20.635	148.702	Temperature	Acidification			Plant & Environment	Shoot Density	Growth	Photosynthetic Output						Water Column Dissolved Oxygen
Low blue carbon storage in eelgrass (Zostera marina) meadows on the Pacific Coast of Canada	Postlethwaite et al.	2018	2023-01-16	Sarah Joy Bittick	Field	Survey			marina		Clayoquot Sound, BC		49.1106	-125.768	Carbon				Plant, Community, & Environment	Physiological Measures	Shoot Density			Distribution	Epiphytes			Water Column Turbidity	Water Column Salinity	Water Column Temperature	Sediment Characteristics
Low oxygen affects photophysiology and the level of expression of two-carbon metabolism genes in the seagrass Zostera muelleri	Kim et al. 2018	2018	2021-06-24	James Roe	Mesocosm	Manipulative			capricornii		Pittwater, NSW, Australia	33°38′45.6′′S, 151°17′12.8′′E	-33.646	151.287	Oxygen				Plant	Physiological Measures	Photosynthetic Output
Macroalgal biomass and species variation in the Lagoon of Venice (Northern Adriatic Sea, Italy)	D. Curiel et al. 2004	2004	2022-10-21	Emma Guerrini Romano	Field	Survey			marina		Lagoon of Venice, Adriatic Sea		42.3333	12.3833	Anthropogenic Use				Community & Environment					Distribution	Macroalgae	Organismal Diversity		Sediment Characteristics
Macroalgal blooms contribute to the decline of seagrass in nutrient-enriched coastal waters	McGlathery 2001	2001	2022-02-04	Devin Ferguson	Field	Survey	Review		marina		Waquoit Bay, MA		41.5628	-70.5214	Nutrients	Invasion	Light		Plant, Community, & Environment	Shoot Density	Growth			Macroalgae	Epiphytes	Chlorophyll A	Organismal Diversity	Water Column Nutrients	Sediment Nutrients
Macroalgal canopies contribute to eelgrass (Zostera marina) decline in temperate estuarine ecosystems	Hauxwell et al. 2001	2001	2022-02-04	Devin Ferguson	Field	Survey			marina		Sage Lot Pond, Waquoit Bay, Massachusetts		41.5528	-70.5098	Nutrients	Invasion	Light		Plant, Community, & Environment	Shoot Density	Growth			Macroalgae	Chlorophyll A	Epiphytes		Water Column Nutrients	Water Column Turbidity					Hamblin pond, Waquoit Bay, Massachusetts		41.5729	-70.5079
Macroalgal growth on bivalve aquaculture netting enhances nursery habitat for mobile invertebrates and juvenile fishes	Powers et al	2007	2022-12-02	Sarah Joy Bittick	Field	Survey			marina		Bogue, Back and Core Sounds North Carolina USA		34.7088	-76.5582	Aquaculture Impacts	Habitat Fragmentation			Community					Organismal Diversity	Macroalgae	Epiphytes
Macrophyte Abundance in Waquoit Bay: Effects of Land-Derived Nitrogen Loads on Seasonal and Multi-Year Biomass Patterns	Sophia E. Fox et al. 2008	2008	2022-06-10	Sadie Kenny	Field	Survey			marina		Set of subestuaries (Childs River, Quashnet River, and Sage Lot Pond) in Waquoit Bay, MA	41° 56' N, 70° 52' W,	41.9333	-70.8667	Nutrients	Temperature	Light		Plant	Growth
Macrophyte communities and their impact on benthic fluxes of oxygen, sulphide and nutrients in shallow eutrophic environments	Viaroli et al.	1996	2022-09-26	Sarah Joy Bittick	Field	Manipulative			noltii		Etang du Prevost		43.5167	3.88272	Nutrients	Aquaculture Impacts			Plant, Community, & Environment	Growth	Physiological Measures			Chlorophyll A	Macroalgae	Epiphytes		Sediment Characteristics	Water Column Dissolved Oxygen	Water Column pH	Water Column Nutrients			Bassin d'Arcachon		44.6694	-1.15957	Fisponds of Certes		44.6899	-1.0278
Macrophyte community response to nitrogen loading and thermal stressors in rapidly flushed mesocosm systems	Kaldy et al.	2017	2022-10-22	Sarah Joy Bittick	Mesocosm	Manipulative			marina	japonica	Yaquina Bay, OR, USA		44.6222	-124.041	Temperature	Nutrients			Plant, Community, & Environment	Growth	Physiological Measures	Shoot Survival		Chlorophyll A	Macroalgae	Epiphytes	Microbial Diversity	Water Column Nutrients	Water Column Temperature	Water Column Salinity	Water Column Dissolved Oxygen
Macrophyte production in a shallow coastal lagoon .1. Coupling with chemico-physical parameters and nutrient concentrations in waters	Sfriso and Marcomini	1997	2022-10-04	Sarah Joy Bittick	Field	Survey			marina	noltii	Venice Lagoon, Lido		45.4034	12.3523	Nutrients	Herbivory	Sediment		Plant, Community, & Environment	Growth	Shoot Density			Macroalgae	Chlorophyll A			Water Column Nutrients	Water Column Temperature	Sediment Characteristics	Water Column pH			Venice Lagoon, Petto		45.3523	12.3012
Macrophyte production in a shallow coastal lagoon. Part II: Coupling with sediment, SPM and tissue carbon, nitrogen and phosphorus concentrations	Sfriso and Marcomini	1999	2022-10-04	Sarah Joy Bittick	Field	Survey			marina		Venice Lagoon, Petto		45.3523	12.3012	Nutrients	Sediment			Plant, Community, & Environment	Shoot Density	Physiological Measures	Growth		Macroalgae				Sediment Nutrients	Sediment Characteristics	Water Column pH	Water Column Temperature			Venice Lagoon, Lido		45.4034	12.3523
Management of a shallow temperate estuary to control eutrophication: The effect of hydrodynamics on the system's nutrient loading	A.I. Lillebø et al.	2005	2022-10-20	Mehana Muranaka	Field	Survey			noltii		Mondego estuary, west coast of Portugal		40.1287	-8.84636	Nutrients	Hydrodynamics			Plant, Community, & Environment	Growth				Macroalgae	Distribution			Water Column Salinity	Chlorophyll A
Mapping ecosystem processes and function across shallow seascapes	Eyre and Maher	2011	2022-12-06	Sarah Joy Bittick			Model		capricornii		Hastings, Camden Haven and Wallis Lake and the second highest overall functional values in southern Moreton Bay.		-27.5645	153.367	Nutrients				Plant, Community, & Environment	Physiological Measures				Distribution	Macroalgae	Invertebrates		Water Column Nutrients	Water Column Turbidity
Material exchange and food web of seagrass beds in the Sylt-Romo Bight: how significant are community changes at the ecosystem level?	Asmus and Asmus	2000	2022-10-04	Sarah Joy Bittick	Field	Manipulative			marina	noltii	the Sylt-Rømø Bight, is part of the Wadden Sea bordering the coastline of the south-eastern North Sea from the Netherlands up to Denmark.		54.9063	8.39336	Habitat Fragmentation	Nutrients			Plant, Community, & Environment	Shoot Density	Physiological Measures			Organismal Diversity				Water Column Nutrients	Sediment Characteristics
Means of rapid eelgrass (Zostera marina L.) recolonisation in former dieback areas	Tina Maria Greve et al. 2005	2005	2022-05-27	Sadie Kenny	Mesocosm	Survey			marina		Danish estuary, Odense Fjord, Denmark	55º31.418N, 10º31.426E	55.5236	10.5238	Oxygen				Plant & Community	Growth	Shoot Density			Distribution
Measurements of nutrient fluxes and mass balances by on-lime in situ dialysis in a Zostera marina bed	Mogens Rene Flindt 1994	1994	2022-09-15	Emma Guerrini Romano	Mesocosm	Manipulative			marina		Roskilde Fjord, Zealand, Denmark		55.925	12.0417	Nutrients				Plant & Environment	Growth	Reproductive Output	Physiological Measures						Water Column Nutrients	Sediment Nutrients
Meristem oxygen variability in eelgrass (Zostera marina)	Tine Maria Greve, Jens Borum, and Ole Pedersen	2003	2022-10-11	Mehana Muranaka	Mesocosm	Manipulative			marina		freshwater biological laboratory, Helsingørsgade, Denmark		55.9334	12.3061	Light	Temperature	Oxygen		Plant	Physiological Measures
Mesocosm experiments quantify the effects of eutrophication on eelgrass, zostera-marina	Frederick T. Short 1995	1995	2021-06-11	Sadie Kenny	Mesocosm	Manipulative			marina		Little Bay, Jackson Estuarine Laboratory and Department of Natural Resources, University of New Hampshire, 85 Adams Point Road, Durham 03824		43.098	-70.8623	Nutrients	Light			Plant, Community, & Environment	Growth	Shoot Density			Macroalgae	Epiphytes	Chlorophyll A		Water Column Nutrients			Phytoplankton: chlor a, habitat structure: shoot density leaf length
Metabolic adaptation of Zostera marina (eelgrass) to diurnal period of root anoxia	T.A. Kursar et al. 1984	1984	2022-05-28	Emma Guerrini Romano	Field	Manipulative			marina		Great Harbor, Woods Hole, Falmouth, MA, USA		41.5249	-70.679	Oxygen	Light			Plant	Physiological Measures
Metabolic profiling reveals biochemical pathways responsible for eelgrass response to elevated CO2 and Temperature	Carmen C. Zayas-Santiago et al.	2020	2022-12-10	Mehana Muranaka	Mesocosm	Manipulative			marina		south bay virginia near southern limit in western atlantic		37.4673	-76.0612	Carbon	Temperature			Plant	Growth	Shoot Survival	Photosynthetic Output												dumas bay southern puget sound washington		47.3305	-122.381
Metabolism of a nitrogen-enriched coastal marine lagoon during the summertime	Howarth et al	2013	2022-12-10	Hannah Lyford	Field	Survey			marina		West Falmouth Harbor, MA, USA	41.575242 N, 70.652885 W	41.5752	-70.6529	Nutrients	Hydrodynamics			Plant & Environment	Photosynthetic Output	Physiological Measures							Water Column Salinity	Water Column Salinity	Water Column Dissolved Oxygen	Water Column pH			Outer Harbor, MA, USA	41.512034. , 70.760279 W	41.512	-70.7603
Metabolism of different benthic habitats and their contribution to the carbon budget of a shallow oligotrophic sub-tropical coastal system (southern Moreton Bay, Australia)	Eyre, Ferguson, Maher, Oakes, Webb	2010	2022-12-12	Hannah Lyford			Model		capricorni		Southern Moreton Bay, Australia	153° 24'E, 27° 24'S	-27.4	153.4	Carbon	Sediment			Plant, Community, & Environment	Physiological Measures	Photosynthetic Output			Chlorophyll A	Distribution			Water Column Dissolved Oxygen	Water Column Turbidity	Sediment Characteristics	Sediment Nutrients
Metabolomics Reveals Cryptic Interactive Effects of Species Interactions and Environmental Stress on Nitrogen and Sulfur Metabolism in Seagrass	Hasler-Sheetal, Castorani, Glud, Canfield, & Holmer	2016	2022-12-27	Hannah Lyford	Mesocosm	Manipulative			marina		Danish straits connecting the Baltic Sea with the North Sea, Denmark	56.0000° N, 11.0000° E	56	11	Light	Nutrients	Invertebrates	Toxins	Plant, Community, & Environment	Shoot Survival	Shoot Density	Physiological Measures	Photosynthetic Output	Invertebrates	Chlorophyll A			Water Column Turbidity	Water Column Nutrients	Water Column Dissolved Oxygen	Sediment Characteristics			Marine Science Institute, UCSB, California, USA	34.412289 N, 119.841270 W	34.4123	-119.841
Microbial communities in marine sediments modify success of an invasive macrophyte	Gribben et al. 2017	2017	2021-06-23	James Roe	Mesocosm	Manipulative			capricornii		Careel Bay on the mid-eastern coast of Australia	33°37'08.1"S 151°19'36.6"E	-33.6189	151.327	Invasion				Plant & Community	Growth				Microbial Diversity
Microbial communities in sediment from Zostera marina patches, but not the Z. marina leaf or root microbiomes, vary in relation to distance from patch edge	Ettinger, Voerman, Lang, Stachowicz, & Eisen	2017	2022-11-20	Hannah Lyford	Field	Survey			marina		Bodega Bay, California, USA	38.3332° N, 123.0481° W	38.3332	-123.048	Microbiome	Sediment	Habitat Fragmentation	Nutrients	Plant, Community, & Environment	Physiological Measures	Photosynthetic Output			Microbial Diversity	Organismal Diversity	Distribution		Water Column Nutrients	Sediment Characteristics	Sediment Nutrients	Water Column Dissolved Oxygen
Microbiome succession during ammonification in eelgrass bed sediments	C. L. Ettinger et al. 2017	2017	2022-06-23	Emma Guerrini Romano	Mesocosm	Manipulative			marina		Bodega Bay, CA		38.3229	-123.049	Genomics	Nutrients			Plant, Community, & Environment	Growth	Photosynthetic Output			Organismal Diversity	Distribution			Water Column Nutrients
Microphytobenthos contribution to nutrient-phytoplankton dynamics in a shallow coastal lagoon	Webster et al.	2003	2022-10-22	Sarah Joy Bittick	Field	Survey			capricornii		Lake Illawarra, NSW		-34.5266	150.844	Nutrients	Oxygen	Light		Community & Environment					Chlorophyll A				Water Column Dissolved Oxygen	Water Column Temperature	Water Column Nutrients	Water Column Salinity
Microtopography promotes coexistence of an invasive seagrass and its native congener	Hannam and Wyllie-Echeverria	2015	2022-10-04	Sarah Joy Bittick	Field	Manipulative			marina	japonica	Padilla Bay	48.57°N, 122.54°W	48.57	-122.54	Invasion	Seagrass competition			Plant & Community	Shoot Density	Reproductive Output	Growth		Seagrass competition								topography
Mind the Data Gap: Identifying and Assessing Drivers of Changing Eutrophication Condition	Fertig, Kennish, Sakowicz, Reynolds	2014	2022-12-10	Hannah Lyford	Field	Survey			marina		Barnegat Bay-Little Egg Harbor Estuary, NJ, USA	39.5585 N, 74.3706 W	39.5585	-74.3706	Nutrients	Light			Plant, Community, & Environment	Growth	Shoot Density			Distribution	Macroalgae	Chlorophyll A		Water Column Nutrients	Water Column Turbidity	Water Column Temperature	Water Column Dissolved Oxygen
Model fit versus biological relevance: Evaluating photosynthesis-temperature models for three tropical seagrass species	Adams, Collier, Uthicke, Ow, Langlois, & O'Brien	2017	2022-12-27	Hannah Lyford	Mesocosm	Manipulative	Model		mulleri		Green Island, Great Barrier Reef, Australia	16°45′17.70′′S, 145°58′22.74′′E	-16.7549	145.973	Temperature	Light			Plant & Environment	Shoot Density	Physiological Measures	Photosynthetic Output						Water Column Dissolved Oxygen	Water Column Temperature	Water Column Turbidity				Moreton Bay, Brisbane, Australia	27°29′31.70′′S, 153 °24′4.61′′E	-27.4921	153.401
Modeling approach to regime shifts of primary production in shallow coastal ecosystems	Zaldivar, Bacelar, Marinov, Hernandez-Garcia	2009	2022-12-07	Hannah Lyford			Model		marina		Venice Lagoon, Italy	45.3368° N, 12.2750° E	45.3368	12.275	Light	Temperature	Nutrients		Plant, Community, & Environment	Physiological Measures	Photosynthetic Output	Growth		Distribution	Chlorophyll A	Macroalgae		Water Column Dissolved Oxygen	Water Column Nutrients	Water Column Turbidity				Etang de Thau Lagoon, France	43.3980° N, 3.6116° E	43.398	-3.6116
Modeling coupling between eelgrass Zostera marina and water flow	Mohamed A. Abdelrhman	2007	2022-10-29	Mehana Muranaka	Mesocosm	Manipulative			marina		Rhode island, atlantic ecology division, 27 Tarzwell Drive, narragansett		41.4944	-71.4213	Hydrodynamics				Plant	Growth	Photosynthetic Output
Modeling daily production of aquatic macrophytes from irradiance measurements: a comparative analysis	Zimmerman, Cabello-Pasini, & Alberte, 1994	1994	2022-04-10	Hannah Lyford	Field	Survey			marina		Elkhorn Slough National Estuarine Research Reserve, California, USA	36.8058° N, 121.7902° W	36.8058	-121.79	Light	Hydrodynamics			Plant & Environment	Photosynthetic Output								Water Column Turbidity
Modeling dissolved inorganic carbon considering submerged aquatic vegetation	Nakayama et al. 2020	2020	2021-10-21	Hannah Lyford	Mesocosm	Manipulative			marina		Komuke Lagoon, Hokkaido Island, Japan	44°15′7.3″E, 143°30′38.9″N	44.252	143.511	Carbon	Temperature			Plant & Environment	Physiological Measures	Photosynthetic Output							Water Column Nutrients	Water Column Temperature
Modeling Eelgrass Spatial Response to Nutrient Abatement Measures in a Changing Climate	Bobsien et al. 2020	2020	June 7th	Madi Firnett	Mesocosm	Manipulative			marina		Baltic Sea Coast of Schleswig-Holstein, Germany		58.488	19.8633	Light	Hydrodynamics			Plant & Community	Physiological Measures	Photosynthetic Output		Distribution
Modeling future scenarios of light attenuation and potential seagrass success in a eutrophic estuary	Pilar sel Barrio et al.	2014	2022-11-23	Mehana Muranaka	Field	Manipulative			marina		west falmouth harbor, cape cod massachusetts		41.6058	-70.6509	Light	Nutrients			Plant & Community	Growth				Distribution								Chlorophyll A
Modeling herbivorous consumer consumption in the Great Bay Estuary, New Hampshire	Behm & Boumans, 2001	2001	2022-10-12	Hannah Lyford	Field	Survey		Management	marina		Great Bay Estuary, New Hampshire, USA	43.1183° N, 70.8614° W	43.1183	-70.8614	Herbivory				Plant & Community	Growth				Organismal Diversity	Epiphytes
Modeling loss and recovery of Zostera marina beds in the Chespeake Bay: the role of seedlings and seed-bank variability	J. C. Jarvis et al. 2014	2014	2022-11-12	Emma Guerrini Romano			Model		marina		York River, Chesapeake Bay, Massachussets		37.2492	-76.4928	Light	Temperature			Plant & Community	Growth	Reproductive Output			Epiphytes				Water Column Temperature						Site GI		37.2182	-76.3939
Modeling stressors on the eelgrass recovery process in two Danish estuaries	Kadri Kuusemaë et. al	2016	2022-10-11	Mehana Muranaka	Mesocosm	Manipulative			marina		Odense Fjord, Funen		55.4928	10.5464	Hydrodynamics	Sediment	Invertebrates		Plant	Growth														Roskilde Fjord, zealand		55.8091	12.061
Modeling the effects of climate change on eelgrass stability and resilience: future scenarios and leading indicators of collapse	Carr, D'Odorico, McGlathery, Wilberg	2012	2022-12-05	Hannnah Lyford			Model		marina		Virginia Coast Reserve Long Term Ecological Research (VCR LTER) site, VA, USA	37° 25’ N, 75° 46’W	37.4167	-75.7667	Light	Hydrodynamics	Sediment	Temperature	Plant, Community, & Environment	Growth	Shoot Density	Physiological Measures	Shoot Survival	Distribution	Chlorophyll A			Water Column Temperature	Sediment Characteristics	Water Column Temperature	Water Column Dissolved Oxygen
Modelling ecological change over half a century in a subtropical estuary: impacts of climate change, land-use, urbanization and freshwater extraction	Condie, Hayes, Fulton, & Savina	2012	2022-12-17	Hannah Lyford			Model		capricorni		Upper Estuary, Clarence River Estuary, NSW, Australia	29.356902 S, 153.358340 E	-29.3569	153.358	Nutrients	Anthropogenic Use	Habitat Fragmentation	Hydrodynamics	Plant, Community, & Environment	Shoot Survival	Shoot Density	Growth		Distribution	Organismal Diversity	Chlorophyll A	Macroalgae	Water Column Nutrients	Water Column Salinity	Water Column Turbidity	Sediment Characteristics			Lower Estuary, Clarence River Estuary, NSW, Australia	29.435334 S, 153.350069 E	-29.4353	153.35	The Broadwater, Clarence River Estuary, NSW, Australia	29.428448 S, 153.135289 E	-29.4284	153.135	Wooloweyah Lagoon, Clarence River Estuary, NSW, Australia	29.492091 S, 153.320634 E	-29.4921	153.321
Modelling seasonal dynamics of biomasses and nitrogen contents in a seagrass meadow (Zostera noltii Hornem.): application to the Thau lagoon (French Mediterranean coast)	Martin Plus et al. 2003	2003	2022-06-01	Sadie Kenny	Mesocosm	Manipulative			noltii		Thau lagoon (French Mediterranean coast)		43.4002	3.60979	Light	Temperature			Plant & Community	Growth	Physiological Meaures	Photosynthetic Output		Epiphytes
Modelling the effects of eutrophication, mitigation measures and an extreme flood event on estuarine benthic food webs	Baeta et al.	2011	2022-12-03	Sarah Joy Bittick	Field	Survey	Model		noltii		Mondego estuary		40.1322	-8.84772	Nutrients	Hydrodynamics			Plant, Community, & Environment	Growth				Organismal Diversity	Macroalgae	Chlorophyll A		Sediment Characteristics				overfishing
MODELLING THE EFFECTS OF GLOBAL TEMPERATURE INCREASE ON THE GROWTH OF SALT MARSH PLANTS	Couto, Martins, Duarte, Cacador, & Marques	2014	2022-12-07	Hannah Lyford			Model		noltii	noltei	Murraceira Island, Mondego Estuary, Portugal	41.9656° N, 8.7417° W	41.9656	-8.7417	Sediment	Light	Temperature	Hydrodynamics	Plant, Community, & Environment	Physiological Measures	Photosynthetic Output	Growth	Shoot Density	Distribution	Seagrass competition			Water Column Nutrients	Water Column Turbidity	Water Column Dissolved Oxygen	Water Column Temperature
Modelling Zostera marina and Ulva spp. in a coastal lagoon	Aveytua-Alcázara, Camacho-Ibara, Souzab, Allen, Torres	2008	2022-11-23	Hannah Lyford			Model		marina		San Quintin Bay, Baja California, Mexico	30°27′N and 116°00′W	30.45	-116	Nutrients	Light			Plant, Community, & Environment	Growth	Physiological Measures	Shoot Survival	Photosynthetic Output	Macroalgae	Chlorophyll A			Water Column Nutrients	Water Column Turbidity
Modelling Seagrass Biomass and Relative Nutrient Content	Kenov, Deus, Alves, & Neves	2013	2022-12-12	Hannah Lyford			Model		noltii		Marine Environmant Research Center, Lisbon, Portugal	38.757537 N, 9.157923 W	38.7575	-9.15792	Light	Temperature	Sediment	Nutrients	Plant & Environment	Physiological Measures	Shoot Density	Growth						Water Column Nutrients	Water Column Turbidity
Moderate Increase in TCO2 Enhances Photosynthesis of Seagrass Zostera japonica, but Not Zostera marina: Implications for Acidification Mitigation	Miller et al. 2017	2017	2021-10-06	James Roe	Mesocosm	Manipulative			marina	japonica	Padilla Bay, Washington, National Estuarine Research Reserve System	48°29′36.6′′ N, 122°29′8.5′′ W	48.4935	-122.486	Light	Acidification			Plant	Photosynthetic Output	Physiological Measures	Growth
Moderate virulence caused by the protist Labyrinthula zosterae in ecosystem foundation species Zostera marina under nutrient limitation	Brakel et al.	2017	2022-10-20	Sarah Joy Bittick	Mesocosm	Manipulative			marina		Western Baltic Sea near Kiel (54.39° N, 10.18° E)		54.39	10.18	Nutrients	Pathogens			Plant, Community, & Environment	Physiological Measures	Shoot Survival	Growth		Microbial Diversity				Sediment Nutrients						Flensburg (54.75° N 9.87° E), Germany		54.75	9.87	Sylt, North Sea (55.04° N, 8.41° E)		55.04	8.41
Modification of benthic food web structure by recovering seagrass meadows, as revealed by trophic markers and mixing models	Jankowska et al.	2018	2023-01-16	Sarah Joy Bittick	Field	Survey			marina		Gulf of Gdansk, Poland		54.3912	18.7761	Habitat Fragmentation				Plant, Community, & Environment	Physiological Measures				Invertebrates	Microbial Diversity	Epiphytes	Macroalgae	Sediment Characteristics
Modulation of the Eelgrass – Labyrinthula zosterae Interaction Under Predicted Ocean Warming, Salinity Change and Light Limitation	Reusch et al. 2019	2019	2021-06-15	James Roe	Mesocosm	Manipulative			marina		western Baltic Sea: Strande	54.434 N, 10.170 E	54.434	10.17	Light	Salinity	Pathogens	Temperature		Plant	Growth	Physiological Measures	Reproductive Output									Shoot Mortality		western Baltic Sea: Eckernförde	54.449 N, 9.871 E	54.449	9.871
Molecular physiology reveals ammonium uptake and related gene expression in the seagrass Zostera muelleri	Mathieu Pernice et al. 2016	2016	2022-10-14	Sadie Kenny	Mesocosm	Manipulative			mulleri		Pelican Banks, Port Curtis, Queensland, Australia,		-27.3859	153.158	Nutrients				Plant	Physiological Measures
Monitoring of vegetation and fish in six eelgrass beds in Quebec (2005-2010)	Nellis et al.	2012	2022-11-28	Sarah Joy Bittick	Field	Survey	Technical Report		marina		Rimouski Bay		48.8144	-68.0688	Temperature	Light			Plant, Community, & Environment	Growth	Shoot Density	Reproductive Output		Organismal Diversity				Water Column Temperature	Water Column Turbidity
Morphological and physiological differences between two morphotypes of Zostera noltii Hornem. from the south-western Iberian Peninsula	G. Peralta et al. 2000	2000	2022-10-01	Emma Guerrini Romano	Mesocosm	Survey			noltii		Palomes river estuary, south-western Iberian Peninsula, Spain		36.1752	-5.43874	Nutrients				Plant, Community, & Environment	Physiological Measures	Photosynthetic Output	Growth	Shoot Density	Chlorophyll A				Sediment Characteristics	Sediment Nutrients					Ria Formosa, Portugal		37.0178	37.0178
Morphological and physiological variation among seagrass (Zostera marina) genotypes	Hughes, Stachowicz, & Williams	2009	2022-11-20	Hannah Lyford	Mesocosm	Manipulative			marina		Bodega Bay, California, USA	38.3332° N, 123.0481° W	38.3332	-123.048	Nutrients	Genomics	Seagrass competition		Plant, Community, & Environment	Photosynthetic Output	Growth	Physiological Measures	Shoot Density	Seagrass competition	Organismal Diversity			Water Column Nutrients	Water Column Dissolved Oxygen
Morphological characteristics of annual Zostera marina shoots at various germination temperatures	T. Morita et al. 2010	2010	2022-06-27	Emma Guerrini Romano	Mesocosm	Manipulative			marina		Ago Bay, Shima Peninsula, Japan		34.2833	136.783	Temperature				Plant	Shoot Density	Growth
Morphological plasticity in Zostera muelleri across light, sediment, and nutrient gradients in Australian temperate coastal lakes	Angus J. P. Ferguson et al.	2016	2022-11-06	Mehana Muranaka	Field	Survey			mulleri		Lake Macquarie New South Wales, north of Sydney		-33.0871	151.585	Light	Nutrients	Sediment		Plant	Shoot Density	Growth													Lake Tuggerah New South Wales, north of Sydney		-33.307	151.485
Morphological response of Zostera marina reproductive shoots to fertilized porewater	Lisa J. Jackson et al. 2017	2017	2022-10-14	Sadie Kenny	Field	Manipulative			marina		Shinnecock Bay, NY		40.8572	-72.4503	Nutrients				Plant	Reproductive Output	Growth	Physiological Measures
Morphometric variations as acclimation mechanisms in Zostera noltii beds	Peralta, Brun, Hernandez, Vergara, & Perez-Llorens	2005	2022-11-30	Hannnah Lyford	Field	Manipulative			noltii	marina	Ria Formosa, Algarve, Portugal	37.0182° N, 8.0032° W	37.0182	-8.0032	Hydrodynamics	Anthropogenic Use	Genomics	Sediment	Plant, Community, & Environment	Physiological Measures	Photosynthetic Output	Growth	Reproductive Output	Distribution	Seagrass competition	Chlorophyll A		Water Column Nutrients	Water Column Turbidity	Sediment Characteristics
Mortality and productivity of eelgrass Zostera marina under conditions of experimental burial with two sediment types	Mills and Fonseca 2003	2003	2021-06-24	James Roe	Field	Manipulative			marina		North River near Beaufort, NC USA	35° 42’ N, 76° 36’ W	35.7	-76.6	Sediment				Plant	Growth												Shoot Mortality
Mortality rate estimation for eelgrass Zostera marina (Potamogetonaceae) using projections from Leslie matrices	Flores Uzeta et al.	2008	2022-10-21	Sarah Joy Bittick			Model		marina		Punta Banda Estuary on the Pacific coast of Baja California, México (31°40- 31°48 N, and 116°37 -116°40 W)		31.6667	-116.617	Temperature				Plant	Shoot Density	Growth	Shoot Survival
Multi-metric index based on the seagrass Zostera noltii (ZoNI) for ecological quality assessment of coastal and estuarine systems in SW Iberian Peninsula	Garcia-Marin et al.	2013	2022-12-13	Sarah Joy Bittick	Field	Survey			noltii		Ria Formosa (Portugal), and in summer 2009–2011 in Huelva and Cadiz (Spain).		37	-8	Nutrients				Plant & Environment	Shoot Density	Physiological Measures							Water Column Nutrients
Multiple stressors threaten the imperiled coastal foundation species eelgrass (Zostera marina) in Chesapeake Bay, USA	Lefcheck et al., 2017	2017	2022-09-05	Hannah Lyford	Field	Survey			marina		Chesapeake Bay, Virginia, USA	37.5214° N, 76.1050° W	37.5214	-76.105	Light	Nutrients			Community & Environment					Distribution	Chlorophyll A			Water Column Nutrients	Water Column Temperature	Water Column Turbidity	Water Column Salinity
Multiple timescale processes drive ecosystem metabolism in eelgrass (Zostera marina) meadows	Rheuban et al. 2014	2014	2021-06-21	James Roe	Field	Survey			marina		South Bay, Virginia Coast Reserve, USA	37° 15’ 43.662’’ N, 75° 48’ 54.554’’ W	37.2621	-75.8152	Temperature	Light			Plant & Environment	Shoot Density	Growth							Water Column Dissolved Oxygen	Water Column Turbidity
Multi-temporal reconstruction of long-term changes in land cover in and around the Swarktops RIver Estuary, Eastern Cape, South Africa	Hamisai Hamandawana et al.	2020	2022-12-10	Mehana Muranaka	Field	Survey			capensis		Swartkops River Estuary located in nelson mandela bay municipality in eastern cape providence of south africa		-33.8609	25.624	Habitat Fragmentation	Anthropogenic Use			Community					Distribution
Multi-year study of the effects of Ulva sp blooms on eelgrass Zostera marina	Olyarnik and Stachowicz	2012	2022-09-27	Sarah Joy Bittick	Field	Manipulative			marina		Bodega Bay, California	38° 19’ N, 123° 03’ W	38.3167	-123.05	Nutrients	Light			Plant, Community, & Environment	Shoot Density	Growth	Reproductive Output		Epiphytes	Macroalgae			Sediment Characteristics
Nanoparticle-based measurements of pH and O2 dynamics in the rhizosphere of Zostera marina L.: effects of temperature elevation and light-dark transitions	Brodersen, Koren, Lichtenberg, & Kuhl	2016	2022-12-29	Hannah Lyford	Mesocosm	Manipulative			marina		Rungsted Harbour, Denmark	55.884327, 12.547869	55.8843	12.5479	Sediment	Oxygen	Light	Temperature	Plant & Environment	Physiological Measures	Photosynthetic Output	Shoot Density						Water Column pH	Sediment Characteristics	Sediment Nutrients	Water Column Dissolved Oxygen
NATURAL EXPANSION AND EXPERIMENTAL MANIPULATION OF SEAGRASS (ZOSTERA SPP) ABUNDANCE AND THE RESPONSE OF INFAUNAL INVERTEBRATES	Harrison, 1986	1986	2021-11-09	Hannah Lyford	Field	Manipulative			marina	japonica	Robert's Bank, Western Canada	49”2’N; 123”8’W	49.0673	-123.183	Anthropogenic Use				Plant & Community	Shoot Density	Growth			Distribution	Invertebrates
Natural Recovery and Planned Intervention in Coastal Wetlands: Venice Lagoon (Northern Adriatic Sea, Italy) as a Case Study	Facca, Ceoldo, Pellegrino & Sfriso	2014	2022-12-08	Hannah Lyford	Field	Manipulative		Management	marina	noltii	Venice Lagoon, Italy	45.3368° N, 12.2750° E	45.3368	12.275	Anthropogenic Use	Aquaculture Impacts	Nutrients	Sediment	Plant, Community, & Environment	Physiological Measures	Growth	Photosynthetic Output	Shoot Density	Distribution	Macroalgae	Chlorophyll A		Water Column Turbidity	Sediment Characteristics	Sediment Nutrients	Water Column Nutrients
Natural recovery of Zostera noltii seagrass beds and benthic nemoatode assemblage responses to physical disturbance caused by traditional harvesting activities	J. Branco et al. 2018	2018	2022-06-26	Emma Guerrini Romano	Field	Manipulative			noltii		Mira Estuary, Portugal		37.7297	-8.7549	Habitat Fragmentation	Anthropogenic Use			Plant, Community, & Environment	Photosynthetic Output	Physiological Measures			Organismal Diversity				Water Column Nutrients	Water Column pH
Nearshore seascape connectivity enhances seagrass meadow nursery function	Olson, Hessing-Lewis, Haggarty, & Juanes	2019	2023-01-16	Hannah Lyford	Field	Survey			marina		Choked Passage, British Columbia, Canada	53.075494, -129.971456	53.0755	-129.971	Habitat Fragmentation	Hydrodynamics	Invertebrates		Plant, Community, & Environment	Shoot Density	Physiological Measures			Distribution	Macroalgae	Organismal Diversity	Epiphytes	Sediment Characteristics	Water Column Turbidity	Water Column Nutrients
Negative effects of blue mussel (Mytils edulis) presence in eelgrass (Zostera marina) beds in Flensbord fjord, Denmark	Vinther et al. 2008	2008	2021-06-10	Devin Ferguson	Field	Manipulative			marina		Flensbord fjord, Denmark	54°50'N 09°50'E	54.8333	9.83333	Invasion				Plant, Community, & Environment	Growth	Shoot Density	Physiological Measures		Epiphytes				Sediment Nutrients
Negligible isotopic fractionation of nitrogen within temperate Zostera spp. meadows	Russell et al.	2018	2023-01-27	Sarah Joy Bittick	Field	Survey			mulleri	nigricaulis	10 sites located in Port Phillip Bay and 3 sites located in Western Port		-38.0544	144.552	Nutrients				Plant & Environment	Physiological Measures								Sediment Nutrients
New climatic targets against global warming: will the maximum 2 degrees C temperature rise affect estuarine benthic communities?	Crespo et al	2017	2022-12-29	Hannah Lyford	Field	Manipulative			noltii		Mondego Estuary, Portugal	40°08′N, 8°50′W	40.1333	-8.83333	Temperature	Habitat Fragmentation			Plant, Community, & Environment	Physiological Measures	Shoot Density	Growth		Organismal Diversity	Microbial Diversity	Distribution		Water Column Temperature	Sediment Characteristics	Water Column Nutrients
New Insights into Different Reproductive Effort and Sexual Recruitment Contribution between Two Geographic Zostera marina L. Populations in Temperate China	Xu et al	2018	2023-01-01	Hannah Lyford	Mesocosm	Manipulative			marina		Swan Lake, China	37°21′N, 122°34′E	37.35	122.567	Temperature	Habitat Fragmentation			Plant, Community, & Environment	Shoot Density	Reproductive Output	Physiological Measures	Growth	Organismal Diversity	Distribution			Water Column Temperature	Water Column Salinity	Water Column Turbidity				Huiquan Bay, China	36°03′N, 120°20′E	36.05	120.333
New insights into the population genetics of partially clonal organisms: when seagrass data meet theoretical expectations.	Arnaud-Haond, Stoeckel, Bailleul	2020	2023-01-23	Hannah Lyford	Field	Survey		Restoration	marina	noltii	Université de Toulouse, Tolosan, France	43.594514, 1.453489	43.5945	1.45349	Genomics				Plant & Community	Physiological Measures	Reproductive Output			Organismal Diversity
Newly discovered seagrass beds and their potential for blue carbon in the coastal seas of Hainan Island, South China Sea	Jiang et al	2017	2023-01-01	Hannah Lyford	Field	Survey			japonica		Boao Seagrass Bed, Hainan Island, China	19.149754, 110.580431	19.1498	110.58	Nutrients	Carbon	Anthropogenic Use		Plant, Community, & Environment	Shoot Density	Physiological Measures	Photosynthetic Output		Distribution	Organismal Diversity			Water Column Salinity	Water Column Nutrients	Sediment Nutrients	Sediment Characteristics
Niche partitioning of intertidal seagrasses: evidence of the influence of substrate temperature	Marnie Campell et. al	2017	2022-10-09	Mehana Muranaka	Field	Survey			mulleri		Gladstone Harbour, central Queensland, Australia		-23.8795	151.364	Temperature	Sediment			Plant	Growth
Nitrate metabolism in sediments from seagrass (Zostera capricorni) beds of Moreton Bay, Australia	Boon et al. 1986	1986	2021-06-22	Devin Ferguson	Mesocosm	Manipulative			capricornii		Amity Point, Moreton Bay, Queensland, Australia	27°25'S 153°25'E	-27.4167	153.417	Nutrients	Sediment			Environment									Sediment Nutrients						Pelican Banks, Moreton Bay, Queensland, Australia	27°35'S 153°25'E	-27.5833	153.417
Nitrate reductase activity in Zostera marina	Roth & Pregnall 1988	1988	2021-06-17	Devin Ferguson	Mesocosm	Manipulative			marina		Great Harbor meadow, Woods Hole, Massachussetts, USA	41°31'N 70°40'W	41.5167	-70.6667	Nutrients				Plant & Environment	Physiological Measures								Water Column Nutrients						Devil's Foot Island, Woods Hole, Massachussetts, USA	41°31'N 70°40'W	41.5167	-70.6667	Northwest Gutter, Gosnold, Massachussetss, USA	41°30'N 70°42'W	41.5	-70.7
Nitrification, denitrification, and nitrate ammonification in sediments of two coastal lagoons in Southern France	Rysgaard et al.	1996	2022-09-22	Sarah Joy Bittick	Mesocosm	Manipulative			noltii		Bassin d'Arcachon (1 km North of Arcachon), Etang du Provost, Southern France		43.5211	3.89977	Microbiome	Nutrients			Community & Environment					Macroalgae	Invertebrates			Sediment Characteristics	Sediment Nutrients	Water Column Nutrients				Bassin d'Arcachon		44.6708	-1.18944
Nitrogen acquisition and resource allocation strategies in temperate seagrass Zostera nigricaulis: Uptake, assimilation and translocation processes	Nayar et al, 2018	2018	2022-07-17	Hannah Lyford	Mesocosm	Manipulative			nigricaulis		Port Phillip Bay, Victoria, Australia	38° S, 148° E	-38	148	Nutrients	Epiphytes	Light		Plant, Community, & Environment	Shoot Density	Physiological Measures			Organismal Diversity	Epiphytes			Water Column Nutrients	Water Column Turbidity	Sediment Nutrients
Nitrogen acquistition, storage, and use by the co-occuring Mediterranean seagrasses Cymodocea nodosa and Zoste3ra noltii	George P. Kiaemer*, Lucia Mazzella	1999	2022-09-28	Sarah Joy Bittick	Field	Survey			noltii		adjacent to the Aragonese castle on the island of Ischia, gulf of naples	-	40.7312	13.9634	Nutrients				Plant & Environment	Shoot Density	Growth	Physiological Measures						Water Column Nutrients	Sediment Nutrients
Nitrogen cycling in two temperate Zostera marina beds: seasonal variation	Nils Risgaard-Petersen & Lars Ditlev Msrck Ottosen 2000	2000	2022-06-08	Sadie Kenny	Mesocosm	Survey			marina		Junget Beach, Risgkde Bredning, Limfjorden, Denmark	56°46.17'N, 9°6.82'E	56.7695	9.11367	Temperature	Light			Plant & Environment	Growth	Physiological Meaures							Sediment Nutrients	Water Column Nutrients	Water Column Dissolved Oxygen				Vejlby Fed, Bight of Aarhus, Aarhus, Denmark.	56°12.14'N, 10°17.13'E	56.2023	10.2855
Nitrogen dynamics of eelgrass Zostera marina during a late summer period of high growth and low nutrient availability	Pedersen & Borum 1992	1992	2022-03-22	Devin Ferguson	Field	Survey			marina		Hvidøre, Øresund, Denmark		55.6269	12.5037	Nutrients				Plant	Growth	Physiological Measures
Nitrogen fixation in restored eelgrass meadows	Cole & McGlathery	2012	2022-12-01	Hannnah Lyford	Field	Manipulative		Restoration	marina		Hog Island Bay, VA, USA	37.449029 N, -75.795192 W	37.449	-75.7952	Nutrients	Epiphytes	Sediment		Plant, Community, & Environment	Shoot Density	Physiological Measures			Organismal Diversity	Epiphytes	Microbial Diversity		Sediment Characteristics	Sediment Nutrients	Water Column Nutrients				South Bay, Washington DC, USA	37.223628 N, -75.873770 W	37.2236	-75.8738
NITROGEN LIMITATION OF PHOTOSYNTHESIS AND GROWTH - COMPARISON ACROSS AQUATIC PLANT-COMMUNITIES IN A DANISH ESTUARY (ROSKILDE FJORD)	Pedersen	1995	2022-10-03	Sarah Joy Bittick	Field	Manipulative			marina		Olsted Strand, Rosklide Fjord		55.9175	12.0436	Nutrients				Plant & Community	Growth	Photosynthetic Output	Physiological Measures		Macroalgae	Chlorophyll A
Nitrogen Pools in Seagrass Beds of Cynodocea Serrulata and Zostera Capricorni of Moreton Bay, Australia	Boon 1986	1986	2021-06-22	Devin Ferguson	Field	Survey			capricornii		Amity Point, Moreton Bay, Queensland, Australia	27°25'S 153°25'E	-27.4167	153.417	Nutrients	Sediment			Plant & Environment	Growth	Physiological Measures							Sediment Nutrients
Nitrogen Uptake and Internal Recycling in Zostera marina Exposed to Oyster Farming: Eelgrass Potential as a Natural Biofilter	Alexandre et al.	2016	2022-09-27	Sarah Joy Bittick	Field	Survey			marina		San Quintín Bay, Baja California Mexico	30° 30ʹ N, 116° 00ʹ W	30.5	-116	Aquaculture Impacts	Nutrients	Light		Plant, Community, & Environment	Growth	Shoot Density	Physiological Measures	Photosynthetic Output	Epiphytes				Water Column Dissolved Oxygen	Water Column Nutrients
Nitrogen uptake in light versus darkness of the seagrass Zostera noltei: integration with carbon metabolism	Ana Alexandre et al. 2015	2015	2022-11-13	Sadie Kenny	Mesocosm	Manipulative			noltii		Inter-tidal meadow in Ria Formosa lagoon, Southern Portugal		37.0187	-8.00348	Light				Plant	Physiological Measures
Nitrogen versus phosphorus limitation for growth of an estuarine population of eelgrass (Zostera marina L.)	Murray et al. 1992	1992	2022-03-29	Devin Ferguson	Field	Manipulative			marina		Vaucluse Shores, Chesapeake Bay, Virginia, US		35.4167	-75.9833	Nutrients	Sediment			Plant & Environment	Physiological Measures	Growth							Sediment Nutrients
Nitrogenase activity in marine sediments from a temperate saltmarsh lagoon: modulation by complex polysaccharides, ammonium and oxygen	Tibbles, Lucas, Coyne, & Newton, 1994	1994	2022-04-10	Hannah Lyford	Field	Survey			capensis		Langebaan Lagoon, South Africa	33.216667 S, 17.95 E	-33.2167	17.95	Sediment	Nutrients			Plant, Community, & Environment	Physiological Measures				Invertebrates				Water Column Temperature	Sediment Nutrients	Sediment Characteristics
Nitrogen-Fixation Associated with Rinsed Roots and Rhizomes of the Eelgrass Zostera marina	Capone and Budin, 1982	1982	June 15th	Madi Firnett	Mesocosm	Manipulative			marina		Bellport Bay, Long Island, NY	40° 44" 4' N, 72° 53' 43" W	40.7344	-72.8953	Nutrients				Plant	Physiological Measures
Nitrogen-stable isotope signatures in estuarine food webs: A record of increasing urbanization in coastal watersheds	McClelland et al.	1997	2022-10-04	Sarah Joy Bittick	Field	Survey			marina		Timms Pond, Waquoit Bay		41.553	-70.5394	Nutrients				Plant, Community, & Environment	Physiological Measures				Invertebrates	Macroalgae	Organismal Diversity		Water Column Nutrients						Sage Lot Pond		41.5534	-70.5135	Quashnet River,		41.5831	-70.5123	Childs River, and		41.5828	-70.5283	Eel Pond		41.562	-70.5362
Nonlinear Dynamics and Alternative Stable States in Shallow Coastal Systems	McGlathery, Reidenbach, D'Odorico, Fagherazzi, Pace, & Porter	2013	2022-12-17	Hannah Lyford			Model		marina		Virginia Coast Reserve Long Term Ecological Research site, VA, USA	37.420092, -75.687325	37.4201	-75.6873	Sediment	Hydrodynamics	Light		Plant, Community, & Environment	Shoot Density	Photosynthetic Output	Shoot Survival		Invertebrates	Distribution	Chlorophyll A		Water Column Turbidity	Water Column Temperature	Water Column Dissolved Oxygen	Sediment Characteristics
Non-structural carbohydrate reserves of eelgrass Zostera marina	Burke, Dennison, & Moore, 1996	1996	2022-05-30	Hannah Lyford	Field	Manipulative			marina		Chincoteague Bay, Delaware/Chesapeake Bay, Virginia, USA	37.9332°N, 75.3788°W	37.9332	-75.3788	Light	Nutrients	Carbon		Plant & Environment	Growth	Physiological Measures							Water Column Temperature	Water Column Turbidity
Not all plants are the same: Exploring metabolism and nitrogen fluxes in a benthic community composed of different aquatic plant species	Gustafsson & Norkko	2016	2022-12-29	Hannah Lyford	Field	Manipulative			marina		Hanko Peninsula, at the entrance of the Gulf of Finland, Baltic Sea	59° 50.506' N, 23° 14.980' E	59.0918	23.2497	Nutrients	Seagrass competition	Sediment		Plant, Community, & Environment	Physiological Measures	Photosynthetic Output	Shoot Density		Organismal Diversity	Seagrass competition	Epiphytes	Invertebrates	Water Column Dissolved Oxygen	Water Column Nutrients	Sediment Nutrients	Sediment Characteristics
Nuevos Datos Sobre La Distribucion de las Fanerogamas Marinas en los Provincias de Almeria y Granada (New Data About the Distribution of the Seagrass in the Provinces of Almeria and Granada)	D Moreno and J Guirado	2003	2022-09-11	Carolina Salcedo	Field	Survey			marina		The coast of Almeria, Spain and Granada, Spain	Almeria: 36° 50' 17.3004'' N 2° 27' 35.0640'' W Granada: 37° 10' 40.9980'' N 3° 36' 2.9988'' W	36.8381	-2.45974	Habitat Fragmentation				Plant	Growth														GRANADA		37.1781	-3.60083
Numerical modeling of the tidal wave run-up and the eelgrass habitat at the Laizhou Bay	Liu, Zhang, Wang, Ding & Yi	2017	2022-12-22	Hannah Lyford			Model		marina		Laizhou Bay, Shandong Peninsula, China	37°39′ N, 120°13′10″E	37.65	120.219	Hydrodynamics				Plant, Community, & Environment	Shoot Survival	Shoot Density	Photosynthetic Output		Distribution				Water Column Turbidity
Numerical modelling of vertical suspended solids concentrations and irradiance in a turbid shallow system (Vaccares, Se France)	Millet, Robert, Grillas, Coughlan, Banas	2009	2022-11-30	Hannnah Lyford			Model		noltii		Vaccares Lagoon, France	43°32′29.6″ N, 4°38′04.1″ E	43.5416	4.63447	Salinity	Light	Sediment		Plant, Community, & Environment	Growth	Shoot Survival			Distribution	Organismal Diversity			Sediment Characteristics	Water Column Salinity	Water Column Turbidity
Nutrient dynamics in two seagrass species, Posidonia coriacea and Zostera tasmanica, on Success Bank, Western Australia	Walker et al.	2004	2022-10-03	Sarah Joy Bittick	Field	Survey			tasmanica		Success Bank, southwestern Australia		-32.088	115.714	Nutrients				Plant	Physiological Measures	Reproductive Output
Nutrient Enrichment and Food Web Composition Affect Ecosystem Metabolism in an Experimental Seagrass Habitat	Spivak et al.	2009	2022-10-26	Sarah Joy Bittick	Mesocosm	Manipulative			marina		York River, VA		37.2485	-76.4986	Nutrients	Herbivory			Plant, Community, & Environment	Physiological Measures	Growth			Macroalgae	Invertebrates	Epiphytes	Organismal Diversity	Water Column Dissolved Oxygen	Water Column Nutrients	Sediment Characteristics	Sediment Nutrients	predation
Nutrient enrichment increases size of Zostera marina shoots and enriches for sulfur and nitrogne cycling bactereia in root-associated microbiomes	Wang et al. 2020	2020	2021-05-19	Devin Ferguson	Mesocosm	Manipulative			marina		Yaquina Bay, Oregon	43°37'05.2"N 124°01'15.5"W	43.6181	-124.021	Nutrients				Plant, Community, & Environment	Photosynthetic Output	Growth			Microbial Diversity	Distribution			Water Column Nutrients	Sediment Nutrients
Nutrient Enrichment of Seagrass Beds in a Rhode Island Coastal Lagoon	Harlin & Thorne-Miller 1981	1981	2021-06-03	Devin Ferguson	Field	Manipulative			marina		north shore (inland side) of Ninigret Pond, Rhode Island	41°21'N 71°40'W	41.35	-71.6667	Nutrients				Plant & Community	Growth	Physiological Measures			Macroalgae
Nutrient enrichment outweighs effects of light quality in Zostera marina (eelgrass) seed germination	Ming Wang et al. 2017	2017	2022-06-23	Sadie Kenny	Mesocosm	Manipulative			marina		Lidao bay, Rongcheng City, China	122.586E, 37.246N	37.246	122.586	Nutrients	Light			Plant	Growth
Nutrient fluxes in intertidal communities of a South European lagoon (Ria Formosa) – similarities and differences with a northern Wadden Sea bay (Sylt-Rømø Bay)	Asmus et al. 2000	2000	2021-06-18	James Roe	Field	Survey			noltii		Ria Formosa Southern portugal	37°01'21.4"N 7°50'20.2"W	37.0226	-7.83894	Temperature				Plant, Community, & Environment	Photosynthetic Output	Shoot Density	Growth		Macroalgae	Invertebrates			Water Column Nutrients						Sylt-Rømø Bay northern Wadden Sea bay	55°08'27.6"N 8°33'42.1"E	55.141	8.56169
Nutrient limitation and the eutrophication of coastal lagoons	D. Taylor et al. 1995	1995	2022-05-21	Emma Guerrini Romano	Mesocosm	Manipulative			marina		lower Narraganset Bay, Rhode Island, USA		41.5281	-71.3268	Nutrients				Plant, Community, & Environment	Growth	Photosynthetic Output			Invertebrates	Macroalgae			Water Column Nutrients
Nutrient retention in the sediments and the submerged aquatic vegetation of the coastal lagoon of the Ria de Aveiro, Portugal	Catarino, Duck, da Silva, & Figueiredo	2009	2022-11-21	Hannah Lyford	Field	Survey			noltii		Ria de Aveiro, Portugal	40.7°N, 8.7°W	40.7	-8.7	Sediment	Nutrients			Plant, Community, & Environment	Physiological Measures	Shoot Density			Macroalgae	Distribution			Sediment Characteristics	Sediment Nutrients	Water Column Nutrients
Nutrient transfer between seagrass zostera-marina and its epiphytes	C. Peter McRoy & John J. Goering 1974	1974	2021-06-22	Sadie Kenny	Mesocosm	Manipulative			marina		Visovidof Island, Aleutian Islands, Alaska	54° 30' 08"N, 164° 35' 52" W	54.5022	-164.598	Nutrients				Plant	Physiological Meaures				Epiphytes
Nutrient uptake and release during growth and decomposition of eelgrass, Zostera marina L., and its effects on the nutrient dynamics of Lake Grevelingen	Pellikaan & Nienhuis, 1987	1987	2022-02-21	Hannah Lyford	Field	Survey			marina		Grevelingen Estuary, Netherlands	51.708497166 N 4.01999992 E	51.7085	4.02	Nutrients				Plant & Environment	Physiological Measures								Water Column Nutrients
Nutrient versus consumer control of community structure in a Chesapeake Bay eelgrass habitat	Douglass et al. 2007	2007	2021-11-09	Devin Ferguson	Field	Manipulative			marina		Goodwin Islands, at mouth of the York River in Chesapeake Bay, Virginia, USA		37.2167	-76.3833	Nutrients	Herbivory	Invertebrates		Plant & Community	Growth				Epiphytes	Organismal Diversity
Ocean warming increases the nitrogen demand and the uptake of organic nitrogen of the globally distributed seagrass Zostera marina	Alexandre et al.	2020	2023-02-05	Sarah Joy Bittick	Mesocosm	Manipulative			marina		Iceland, UK, and Portugal	Alftafjordur, Iceland (64°59′N; 22°36′W	64.9833	-22.6	Nutrients	Temperature			Plant & Environment	Physiological Measures	Shoot Density							Water Column Nutrients	Sediment Nutrients
Ocean warming, but not acidification, accelerates seagrass decomposition under near-future climate scenarios	Kelaher et al.	2018	2022-10-13	Sarah Joy Bittick	Mesocosm	Manipulative			mulleri		Sandon River [29°40’26.94”S, 153°19’27.53”E]		-29.6742	153.324	Temperature	Acidification			Plant	Physiological Measures	Growth	Shoot Survival												Callalla Bay [35°00’32.03”S, 150°43’2.30”E]		-35.0089	150.717	Sussex Inlet [35°09’54.72”S, 150°08’36.73”E])		-35.17	150.144	Wooli River [29°52’53.98”S, 153°15’54.11”E])		-29.8817	153.265
On the use of sediment fertilization for seagrass restoration: a mesocosm study on Zostera marina L.	Gloria Peralta et al. 2003	2003	2022-06-03	Sadie Kenny	Mesocosm	Manipulative			marina		Intertidal of Zandkreek (Zealand, The Netherlands)		51.5477	3.81043	Nutrients	Light	Sediment		Plant & Community	Growth	Physiological Meaures	Photosynthetic Output						Sediment Nutrients	Sediment Characteristics
Optical Sensor Nanoparticles in Artificial Sediments-A New Tool To Visualize O-2 Dynamics around the Rhizome and Roots of Seagrasses	Koren, Brodersen, Jakobsen, & Kuhl	2015	2022-12-27	Hannah Lyford	Mesocosm	Manipulative			mulleri	capricorni	Brisbane Waters, NSW, Australia	27.470125 S, 153.021072 E	-27.4701	153.021	Oxygen	Sediment	Light		Plant & Environment	Photosynthetic Output	Physiological Measures	Shoot Density	Shoot Survival					Water Column Dissolved Oxygen	Sediment Nutrients	Sediment Characteristics	Water Column Turbidity
Optimal long-term seed storage conditions for the endangered seagrass Zostera japonica: implications for habitat conservation and restoration	Yue et al.	2019	2023-02-05	Sarah Joy Bittick	Mesocosm	Manipulative			japonica		Swan Lake, Rongcheng City, Shandong	37°35′ N, 122°57′ E	37.5833	122.95	Salinity	Temperature			Plant	Reproductive Output	Physiological Measures
Optimum Temperatures for Net Primary Productivity of Three Tropical Seagrass Species	Collier, Ow, Langlois, Uthicke, Johansson, O'brien, Hrebien, & Adams	2017	2022-12-29	Hannah Lyford	Mesocosm	Manipulative			mulleri		Northern Great Barrier Reef, Australia	16° 45.29′S 145° 58.38′E	-16.7548	145.973	Temperature				Plant & Environment	Photosynthetic Output	Shoot Density	Growth						Water Column Temperature	Water Column Dissolved Oxygen					Moreton Bay, Australia	27° 29.53′S 153° 24.09′E	-27.4922	153.401
Organic matter and benthic metabolism in Lake Illawarra, Australia	Qu et al.	2006	2022-10-08	Sarah Joy Bittick	Mesocosm	Manipulative			capricornii		Lake Illawarra (34°32′S and 150°50′E)		-34.5333	150.833	Light	Nutrients			Plant, Community, & Environment	Photosynthetic Output	Physiological Measures			Macroalgae				Water Column Nutrients	Water Column pH	Sediment Characteristics	Water Column Temperature
Origin and composition of sediment organic matter in a coastal semi-enclosed ecosystem: An elemental and isotopic study at the ecosystem space scale	Dubois, Savoye, Gremare, Plus, Charlier, Beltoise, & Blanchet	2012	2022-12-17	Hannah Lyford	Field	Survey			noltii		Archachon Bay, France	44°40’ N, 1°10’ W	44.6667	-1.16667	Sediment				Plant, Community, & Environment	Physiological Measures				Macroalgae	Chlorophyll A	Organismal Diversity		Sediment Characteristics	Sediment Nutrients	Water Column Turbidity
Overexpression of Seagrass Nucleotide Exchange Factor Gene ZjFes1 Enhances Heat Tolerance in Transgenic Arabidopsis	Chen and Qui	2020	2023-02-06	Sarah Joy Bittick	Mesocosm	Manipulative			japonica		Guangxi Mangrove Research Center, Guangxi Academy of Sciences, Beihai, China		21.399	109.159	Temperature				Plant	Physiological Measures												ice scouring
Overgrowth of eelgrass by the invasive colonial tunicate Didemnum vexillum: Consequences for tunicate and eelgrass growth and epifauna abundance	H. A. Long et al. 2015	2015	2022-06-13	Emma Guerrini Romano	Mesocosm	Manipulative			marina		Tomales Bay, California, USA		38.1406	-122.896	Invertebrates	Invasion			Plant & Community	Growth	Shoot Density			Invertebrates	Organismal Diversity
Oxic microshield and local pH enhancement protects Zostera muelleri from sediment derived hydrogen sulphide	K. E. Brodersen et al. 2014	2014	2022-06-23	Emma Guerrini Romano	Mesocosm	Manipulative			mulleri		Narrabeen Lagoon, NSW, Australia		-33.7129	151.286	Acidification		Oxygen	Light	Plant & Environment	Photosynthetic Output	Growth	Physiological Measures						Water Column pH	Water Column Dissolved Oxygen	Water Column Nutrients
Oxic microzones and radial oxygen loss from roots of Zostera marina	Jensen et al.	2005	2022-11-29	Sarah Joy Bittick	Mesocosm	Manipulative			marina		Rungsted Harbour, Denmark		55.8847	12.5489	Sediment	Oxygen	Light		Plant & Environment	Growth	Physiological Measures							Sediment Characteristics	Water Column Dissolved Oxygen
Oxygen and carbon metabolism of Zostera muelleri across a depth gradient - Implications for resilience and blue carbon	Ferguson et al.	2017	2022-12-07	Sarah Joy Bittick	Field	Survey			mulleri		Lake Macquarie		-33.0805	151.628	Light	Carbon			Plant, Community, & Environment	Growth	Physiological Measures			Chlorophyll A				Sediment Characteristics	Water Column Temperature	Water Column Salinity	Water Column Turbidity
Oxygen Consumption and Sulfate reduction in vegitates and coastal habitats: effects of physical disturbance	Kasper Elgetti Brodersen et al.	2019	2022-11-30	Mehana Muranaka	Mesocosm	Manipulative			mulleri		Fagans Bay NSW Australia		-33.4323	151.319	Oxygen	Anthropogenic Use			Environment									Sediment Nutrients	Sediment Characteristics
Oxygen Exchange and Primary Production of Zostera japonica Ascherson et Graebner 1907 Community in the Golubinyi Bay (Sea of Japan)	L. I. Sabitova et al. 2018	2018	2022-12-01	Sadie Kenny	Field	Survey			japonica		south of the Primorye Territory in the Golubinyi Bay		42.45	130.78	Light	Salinity	Temperature		Plant	Photosynthetic Output	Growth	Physiological Measures						Water Column Dissolved Oxygen
Oyster aquaculture impacts Zostera marina epibiont community composition in Akkeshi-ko estuary, Japan	Smith et al.	2018	2022-10-12	Sarah Joy Bittick	Field	Survey			marina		Akkeshi-ko estuary	; 43˚01–43˚04N, 144˚50–144˚56E	43.0167	144.833	Aquaculture Impacts				Plant, Community, & Environment	Shoot Density	Growth			Epiphytes	Invertebrates	Organismal Diversity	Macroalgae	Sediment Characteristics
Oysters and eelgrass: potential partners in a high pCO2 ocean	Groner et al. 2018	2018	2021-06-16	James Roe	Mesocosm	Manipulative			marina		Beach Haven, Orcas Island, WA, USA	48.691° N, 122.952° W	48.691	-122.952	Invertebrates	Pathogens	Acidification		Plant & Environment	Growth									Water Column pH
OYSTERS AND AQUACULTURE PRACTICES AFFECT EELGRASS DENSITY AND PRODUCTIVITY IN APACIFIC NORTHWEST ESTUARY	Tallis et al.	2009	2022-09-27	Sarah Joy Bittick	Field	Manipulative			marina		Willapa Bay, WA		46.5334	-124.017	Aquaculture Impacts				Plant & Community	Shoot Density	Growth			Invertebrates
Partial function prediction of sulfate-reducing bacterial community from the rhizospheres of two typical coastal wetland plants in China	Song et al.	2021	2022-10-17	Sarah Joy Bittick	Field	Survey			japonica		n Swan Lake (37°21′24″N, 122°35′21″E)		37.3567	122.589	Microbiome				Community & Environment					Microbial Diversity				Sediment Characteristics	Sediment Nutrients
Patch distribution and within-patch dynamics of the seagrass Zostera noltii Hornem in Los Toruños salt-marsh, Cádiz Bay, natural park, Spain	F.G. Brun et al. 2003	2003	2022-05-20	Emma Guerrini Romano	Field	Survey			noltii		Los Toruños salt-marsh, Cádiz Bay Natural Park, Spain		36.5	-6.16667	Nutrients				Plant	Shoot Density	Growth	Physiological Measures
Patch Dynamics of Eelgrass Zostera marina	Olesen & Jensen, 1994	1994	2022-02-21	Hannah Lyford	Field	Survey			marina		Limfjorden, Denmark	56.8937° N, 8.9514° E	56.8937	8.9514	Nutrients	Light			Plant & Community	Growth	Shoot Density	Reproductive Output	Shoot Survival	Distribution
Patterns in leaf herbivory on seagrass	J. Cebrian et al. 1998	1998	2022-06-19	Emma Guerrini Romano	Field	Survey			marina	noltii	Portugese Coast		37.75	-8.81287	Herbivory				Plant	Shoot Density																37	-8.94557
Patterns of abundance of seagrasses and associated infaunal communities at Inhaca Island, Mozambique	Paula et al.	2001	2022-10-04	Sarah Joy Bittick	Field	Survey			capensis		Inhaca Island, Mozambique		-26.065	32.9163	Nutrients	Acidification			Plant, Community, & Environment	Growth				Organismal Diversity	Chlorophyll A	Epiphytes		Water Column Nutrients	Water Column pH	Sediment Characteristics	Sediment Nutrients
Patterns of carbon isotopic variability in eelgrass, Zostera marina L., from Izembek Lagoon, Alaska	Cooper, 1989	1989	2022-02-21	Hannah Lyford	Field	Survey			marina		Izembek Lagoon, Alaska, USA	55 ° 16' N, 163 °07'W	55.2667	-163.117	Carbon	Acidification			Plant & Environment	Physiological Measures	Photosynthetic Output							Sediment Nutrients
Patterns of seagrass community response to local shoreline development	Blake et al.	2014	2022-10-04	Sarah Joy Bittick	Field	Survey			marina		Chesapeake Bay, VA 20 sites	37°13′14′′ N, 76°24′10′′ W	37.2206	-76.4028	Habitat Fragmentation	Anthropogenic Use			Plant, Community, & Environment	Shoot Density	Physiological Measures			Epiphytes	Organismal Diversity	Invertebrates		Sediment Characteristics	Water Column Temperature	Water Column Dissolved Oxygen	Water Column Salinity
Peridocity of epiphytes on Zostera marina in two embayments of the souther Gulf of St. Lawrence	I. Novaczek 1986	1986	2022-06-09	Emma Guerrini Romano	Mesocosm	Manipulative			marina		Pomquet Harbor, Antigonish County and Barrachoid Harbor, Colchester County Nova Scotia.	Pomquet Harbor	45.6333	-61.8167	Temperature	Light			Community					Epiphytes	Microbial Diversity											45.7333	-63.2667
Phenology and photosynthetic characteristics of a Japanese seagrass Zostera marina at the southern end of its distribution in the northwestern Pacific	Kawano et al.	2012	2022-12-06	Sarah Joy Bittick	Mesocosm	Manipulative			marina		Kagoshima Bay	31°09.967′N, 130°35.358′E	31.1661	130.589	Temperature				Plant, Community, & Environment	Photosynthetic Output	Growth	Reproductive Output	Shoot Density	Macroalgae				Water Column Salinity	Water Column Temperature	Water Column Dissolved Oxygen	Water Column Turbidity
Phosphorous dynamics in a temperate intertidal estuary	Lillebo et al.	2004	2022-11-29	Sarah Joy Bittick	Field	Survey			noltii		Mondego estuary, Portugal		40.1467	-8.85352	Nutrients				Environment									Water Column Nutrients	Water Column Temperature	Water Column Salinity	Water Column Dissolved Oxygen
Photoacclimatory Responses of Zostera marina in the Intertidal and Subtidal Zones	Sang Rul Park et al. 2016	2016	2022-06-15	Sadie Kenny	Field	Survey			marina		Aenggang Bay, southern coast of Korea	34° 46 ́N, 127° 56 ́E	34.7667	127.933	Light	Hydrodynamics			Plant	Photosynthetic Output	Physiological Meaures	Growth												Koje Bay, southern coast of Korea	34°48 ́N, 128°35 ́E	34.8	128.583
Photoadaptation and growth of zostera-marina l (eelgrass) transplants along a depth gradient	William C. Dennison & Randall S. Alberte 1986	1986	2021-06-10	Sadie Kenny	Field	Manipulative			marina		Great Harbor, Woods Hole, MA	40° 31.5' N, 70° 40.5' W	40.525	-70.675	Light				Plant & Environment	Growth	Photosynthetic Output	Physiological Meaures						Water Column Dissolved Oxygen			Depth Gradient
Photorespiration and Carbon Limitation Determine Productivity in Temperate Seagrasses	Buapet et al. 2013	2013	2021-06-25	James Roe	Mesocosm	Manipulative			marina		Swedish Skagerrak coast	58°20' N 11°40' E	58.3333	11.6667	Oxygen	Carbon	Acidification		Plant	Photosynthetic Output														Swedish Skagerrak coast	58°30 N and 11°50 E	58.5	11.8333
Photosynthetic and growth response of eelgrass to low oxygen and high sulfide concentrations during hypoxic events	Marianne Holmer & Elsebet Juhl Bondgaard 2001	2001	2022-05-31	Sadie Kenny	Mesocosm	Manipulative			marina		Archipelago of South Fyn, Denmark	55◦58′0′′N, 10◦36′6′′E	55.9667	10.6017	Oxygen	Nutrients			Plant	Growth	Shoot Density	Photosynthetic Output	Physiological Meaures
Photosynthetic and metabolic responses of eelgrass Zostera marina L. to short-term high-temperature exposure	GAO Yaping et al. 2019	2019	2021-06-05	Sadie Kenny	Mesocosm	Manipulative			marina		Sanggou Bay	122° 34' 04" E, 37° 02' 32" N	37.0422	122.568	Temperature				Plant & Environment	Photosynthetic Output	Physiological Meaures							Water Column Dissolved Oxygen
Photosynthetic and morphological responses of eelgrass (Zostera marina L.) to a gradient of light conditions	Caroline A. Ochieng et al. 2010	2010	2022-06-03	Sadie Kenny	Mesocosm	Manipulative			marina		Great Bay Estuary, New Hampshire and Maine (USA)	43°05′N, 70°50′W	43.0833	-70.8333	Light				Plant	Growth	Shoot Density	Photosynthetic Output	Reproductive Output											Fishing Island, Maine, USA	43° 04′N, 70°42′W	43.0667	-70.7
Photosynthetic Characteristics of Seagrasses (Cymodocea serrulata, Thalassia hemprichii and Zostera capricorni) in a Low-light Environment, with a Comparison of Leaf-marking and Lacunal-gas Measurements of Productivity	Peter C.Pollard & Margaret Greenway 1993	1993	2022-09-22	Sadie Kenny	Field	Survey			capricornii		In the turbid, warm waters of Cairns Harbour, Queensland, Australia.	145°47'E,16°55' S	-16.9167	145.783	Light				Plant	Photosynthetic Output	Growth
Photosynthetic responses of eelgrass (zostera-marina l) to light and sediment sulfide in a shallow barrier-island lagoon	Jill L. Goodman et al. 1995	1995	2021-06-10	Sadie Kenny	Mesocosm	Manipulative			marina		Shallow barrier island lagoon, Chincoteague Bay, Virginia/Maryland	37° N, 75°W	37	-75	Toxins	Light			Plant & Environment	Physiological Meaures	Photosynthetic Output							Water Column Dissolved Oxygen
Photosynthetic responses of seven tropical seagrasses to elevated seawater temperature	Stuart J. Campbell et al. 2006	2006	2021-06-05	Sadie Kenny	Mesocosm	Manipulative			capricornii		Cairns Harbour mud bank, Queensland, Australia	16° 53' S, 145° 46' E	-16.8833	145.767	Temperature				Plant	Physiological Meaures	Photosynthetic Output
Photosynthetic responses of two temperate seagrasses across a water quality gradient using chlorophyll fluorescence	Cambell et al. 2002	2002	2021-06-14	JT	Field	Survey			tasmanica	capricorni	Charing Cross, Crib Point, Newhaven, Australia	38°15.330' S, 145°21.550' E	-38.2555	145.359	Light	Nutrients			Plant & Community	Growth	Photosynthetic Output			Chlorophyll A										Charing Cross, Crib Point, Newhaven, Australia	38°21.300' S, 145°13.775'E	-38.355	145.23	Charing Cross, Crib Point, Newhaven, Australia	38°30.585' S, 145°21.648' E	-38.5097	145.361
Photosynthetic responses of zostera-marina l (eelgrass) to insitumanipulations of light-intensity	William C. Dennison & Randall S. Alberte 1982	1982	2021-06-03	Sadie Kenny	Field	Manipulative			marina		Great Harbor, Woods Hole, MA	40° 31.5' N, 70° 40.5' W	40.525	-70.675	Light				Plant	Photosynthetic Output	Physiological Meaures	Growth	Shoot Density
Physiological and Morphological Responses of the Temperate Seagrass Zostea muelleri to Multiple Stressors: Investigating the Interactive Effects of LIght and Temperature	York et al. 2013	2013	2021-11-21	Devin Ferguson	Mesocosm	Manipulative			mulleri		Cams Wharf, Lake Macquarie, New South Wales, Australia		-33.1258	151.614	Light	Temperature			Plant	Growth	Shoot Density	Physiological Measures
Physiological responses of eelgrass (Zostera marina) to ambient stresses such T as herbicide, insufficient light, and high water temperature	Mochida et al. 2019	2019	2021-06-23	James Roe	Mesocosm	Manipulative			marina		Coastal area of Suo- oshima, Yamaguchi Prefecture, Japan	33° 56.33ʹ N, 132° 24.19ʹ E	33.9388	132.403	Light	Temperature	Herbicides		Plant	Photosynthetic Output	Physiological Measures	Growth
Physiological responses of seagrasses used to identify anthropogenic nutrient inputs	Dennison & Udy, 1997	1997	2022-09-05	Hannah Lyford	Field	Survey			capricorni		Moreton Bay, Queensland, Australia	27° S, 153° E	-27	153	Nutrients	Anthropogenic Use			Plant & Environment	Shoot Density	Physiological Measures	Growth						Water Column Nutrients	Sediment Nutrients
Physiological responses of the seagrass, Zostera marina L, to increased water-column nitrate and increased temperature.	Touchette, Burkholder, & Glasgow, 2003	2003	2022-08-28	Hannah Lyford	Mesocosm	Manipulative			marina		NOAA, Beaufort, North Carolina, USA	34.7187° N, 76.6725° W	34.7187	-76.675	Nutrients	Temperature			Plant, Community, & Environment	Shoot Density	Physiological Measures			Epiphytes				Water Column Nutrients	Water Column Salinity	Water Column Dissolved Oxygen	Sediment Nutrients		Water Column pH
Physiological responses of Zostera marina and Cymodocea nodosa to liht-limitation stress	João Silva et al.	2013	2022-11-10	Mehana Muranaka	Field	Manipulative			marina		Ria Formosa Lagoon, southern Portugal		37.0036	-7.97826	Light				Plant & Community	Physiological Measures	Photosynthetic Output			Seagrass competition
Physiological and morphological responses of the seagrass zostera-capricorni aschers to light-intensity	E.G. Abal et al. 1994	1994	2021-06-16	Sadie Kenny	Mesocosm	Manipulative			capricornii		Shallow water mudflats, Victoria Point, western shore of Moreton Bay, Queensland, Australia	27° 35.05' S, 153° 19.02' E	-27.5842	153.317	Light				Plant	Growth	Shoot Density	Physiological Meaures
Phytotoxicity of Four Photosystem II Herbicides to Tropical Seagrasses	Flores et al.	2013	2022-10-10	Sarah Joy Bittick	Mesocosm	Manipulative			mulleri		Pelican, Banks, Gladstone, Australia (23°46.005’ S, 151° 18.052E).		-23.7667	151.301	Herbicides				Plant	Photosynthetic Output	Growth
Plant genotype and nitrogen loading influence seagrass productivity, biochemistry, and plant-herbivore interactions	F. Tomas et al. 2011	2011	2022-06-21	Emma Guerrini Romano	Mesocosm	Manipulative			marina		"Haphazardly" collected outside of Bodega Marine Laboratory, Bodega Bay, Davis, California		38.317	-123.073	Nutrients	Genomics			Plant, Community, & Environment	Growth	Physiological Measures	Shoot Density		Epiphytes	Invertebrates			Sediment Nutrients	Water Column Nutrients
Plant genotype identity and diversity interact with mesograzer species to influence detrital consumption in eelgrass meadows	Laura K. Reynolds et al.	2018	2022-12-10	Mehana Muranaka	Mesocosm	Manipulative			marina		bodega bay		38.3056	-123.027	Genomics	Herbivory			Plant & Community	Shoot Survival	Physiological Measures
Polychaete assemblages as indicators of habitat recovery in a temperate estuary under eutrophication	Cardoso et al.	2007	2022-10-20	Sarah Joy Bittick	Field	Survey			noltii		40 08 N, 8 50 W, Mondego Estuary	40 08 N, 8 50 W	40.1333	-8.83333	Nutrients	Hydrodynamics			Community					Invertebrates	Organismal Diversity
Population genetic analyses of transplanted eelgrass (Zostera marina) beds reveal reduced genetic diversity in southern California	Williams, 1996	1996	2022-09-05	Hannah Lyford	Field	Survey			marina		San Diego Bay, California, USA	32.6717° N, 117.1441° W	32.6717	-117.144	Genomics				Plant & Community	Shoot Survival	Growth			Distribution										San Quintin Bay, Baja California, Mexico	30°33′37″N 115°56′33″W	30.5603	-115.942
Population genetic structure of eelgrass (Zostera marina) on the Korean coast: Current status and conservation implications for future management	Kim et al.	2017	2022-12-07	Sarah Joy Bittick	Field	Survey			marina		m 10 different localities on the southern coast of Korea (including Jeju Island, which is located off the southern tip of Korea)		33.5712	126.739	Genomics				Plant	Physiological Measures
Population specific salinity tolerance in eelgrass (Zostera marina)	Tiina Salo et al. 2014	2014	2022-06-07	Sadie Kenny	Mesocosm	Manipulative			marina		Ängsö, Northern Baltic Sea, Finland	N60°06′35, E020°42′34	60.1097	20.7094	Salinity				Plant	Growth	Physiological Meaures	Photosynthetic Output												Isefjorden, Southwestern Baltic Sea, Denmark	N55°42′44, E011°47′35	55.7122	11.7931
Population-level effects of clam harvesting on the seagrass Zostera noltii	Cabaco et al. 2005	2005	2021-06-18	James Roe	Field	Manipulative			noltii		Ria Formosa lagoon, southern Portugal	37°01'46.3"N 7°49'04.1"W	37.0295	-7.81781	Aquaculture Impacts				Plant	Shoot Density	Growth											Shoot Mortality
Population-specificity of heat stress gene induction in northern and southern eelgrass Zostera marina populations under simulated global warming	Bergmann et al. 2010	2010	2022-02-16	Devin Ferguson	Mesocosm	Manipulative			marina		North Sea, Doverodde, Denmark		56.7178	8.47417	Temperature				Plant & Environment	Growth	Shoot Density	Physiological Measures		Organismal Diversity										Ebeltoft, Benthic Sea, Denmark		56.2083	10.5775	Gabicce Mare, Adriatic Sea, Italy		43.9662	12.7643
Positive and negative interactions control a facilitation cascade	Gribben et al	2017	2022-12-29	Hannah Lyford	Field	Manipulative			mulleri		Lake Macquarie, New South Wales, Australia	33°07′ S, 151°35′ E	-33.1167	151.583	Invertebrates	Herbivory			Plant & Community	Shoot Density	Growth	Photosynthetic Output		Organismal Diversity	Invertebrates	Epiphytes
Positive effects of mesograzers on epiphytes in an eelgrass system	S Jaschinski and U Sommer	2010	2022-10-22	Carolina Salcedo	Mesocosm	Manipulative			marina		Falkenstein Beach in the inner Kiel Fjord, Germany	54° 21' N 10° 9' E	54.35	10.15	Invertebrates	Herbivory	Nutrients		Plant & Community	Photosynthetic Output				Epiphytes
Positive Feedbacks in Seagrass Ecosystems – Evidence from Large-Scale Empirical Data	van der Heide, van Nes, van Katwijk, Olff, Smolders	2011	2022-12-06	Hannah Lyford			Model		marina		Danish Baltic Area, Denmark	55.575172, 12.623815	55.5752	12.6238	Light	Nutrients	Sediment		Plant, Community, & Environment	Physiological Measures	Shoot Density			Distribution				Sediment Characteristics	Sediment Nutrients	Water Column Nutrients	Water Column Turbidity			Polish Baltic Coast, Poland	54.276651, 19.333497	54.2767	19.3335	German Baltic Coast, Germany	54.091558, 13.783631	54.0916	13.7836	French Atlantic Coast, France	48.701569, -1.576295	48.7016	-1.5763	Swedish Baltic Area, Sweden	59.216568, 18.575414	59.2166	18.5754
Positive responses of a seagrass ecosystem to experimentalnutrient enrichment	Brendan P. Kelaher et al. 2013	2013	2021-06-19	Sadie Kenny	Field	Manipulative			mulleri		Mullet Creek, tributary of the Hawkesbury River, New South Wales, Australia	33° 29' 17" S, 151° 15' 45" E	-33.4881	151.262	Nutrients				Plant, Community, & Environment	Growth				Epiphytes	Organismal Diversity	Invertebrates		Sediment Nutrients	Sediment Characteristics
Potential impacts of finfish aquaculture on eelgrass (Zostera marina) beds and possible monitoring metrics for management: a case study in Atlantic Canada	Nakia Cullain	2018	2022-12-02	Mehana Muranaka	Field	Survey			marina		atlantic coast of nova scotia port mouton bay		43.9171	-64.8275	Aquaculture Impacts				Plant, Community, & Environment	Growth	Shoot Density	Physiological Measures		Epiphytes	Macroalgae			Sediment Nutrients
Potential uptake of dissolved organic matter by seagrasses and macroalgae	Tom Van Engeland et al. 2011	2011	2021-06-24	Sadie Kenny	Mesocosm	Manipulative			noltii		Santibañez, Cadiz, Spain	36° 28' 12.79" N, 6° 15' 7.07" W	36.4702	-6.25196	Nutrients				Plant	Physiological Meaures
Predicting habitat suitability in temperate seagrass ecosystems	Heide, Peeters, Hermus, van Katwijk, Roelofs & Smolders	2009	2022-11-30	Hannnah Lyford	Field	Survey		Restoration	noltii	marina	Finnish Baltic Coast, Finland	59.866626, 23.420650	59.8666	23.4206	Light	Hydrodynamics	Sediment	Nutrients	Plant, Community, & Environment	Physiological Measures	Shoot Density	Growth		Distribution	Macroalgae	Chlorophyll A		Water Column Nutrients	Sediment Characteristics	Sediment Nutrients	Water Column Turbidity			Latvian Baltic Coast, Latvia	57.682933, 22.408517	57.6829	22.4085	Swedish Baltic Area, Sweden	59.216568, 18.575414	59.2166	18.5754	Polish Baltic Area, Poland	54.276651, 19.333497	54.2767	19.3335	German Baltic Area, Germany	54.091558, 13.783631	54.0916	13.7836
Predicting seagrass decline due to cumulative stressors	Adams et al.	2020	2023-02-06	Sarah Joy Bittick			Model		mulleri		Great Barrier Reef		-19.2289	146.871	Light	Temperature			Plant & Environment	Photosynthetic Output	Shoot Survival	Shoot Density	Physiological Measures					Water Column Turbidity	Water Column pH	Water Column Temperature
Predicting carbon isotope discrimination in Eelgrass (Zostera marina L.) from the environmentalparameterslight, flow, and [DIC]	Meredith L. McPherson et al. 2015	2015	2022-10-08	Sadie Kenny	Mesocosm	Manipulative			marina		Chesapeake Bay National Estuarine Research Reserve site at the Goodwin Islands	37º 13' N; 76º 23' W	37.2167	-76.3833	Light	Carbon	Hydrodynamics		Plant	Physiological Measures	Photosynthetic Output
Predictive modelling of eelgrass (Zostera marina) depth limits	Greve & Krause-Jensen	2005	2022-11-14	Hannah Lyford			Model		marina		Denmark coast (82 sites)	Too many sites with no coordinates/specific names given			Light	Nutrients	Oxygen		Plant, Community, & Environment	Growth				Distribution				Water Column Nutrients	Water Column Salinity	Water Column Turbidity	Water Column Dissolved Oxygen
Preventable fine sediment export from the Burdekin River catchment reduces coastal seagrass abundance and increases dugong mortality within the Townsville region of the Great Barrier Reef, Australia	Wooldridge	2017	2022-11-30	Hannnah Lyford	Field	Survey			capricorni		Cleveland Bay, Townsville, North Queensland, Australia	-19.287626 S, 146.899207 E	-19.2876	146.899	Sediment	Nutrients	Light		Plant, Community, & Environment	Photosynthetic Output	Physiological Measures	Shoot Survival	Shoot Density	Organismal Diversity	Distribution			Water Column Turbidity	Sediment Characteristics	Sediment Nutrients
Previous Exposure Mediates the Response of Eelgrass to Future Warming via Clonal Transgenerational Plasticity	DuBois et al. 2020	2020	June 8th	Madi Firnett	Mesocosm	Manipulative			marina		Westside Park, Bodega Harbor, California	38°19.1920 N, 123°03.1890 W	38.3199	-123.053	Temperature				Plant	Growth	Shoot Density	Reproductive Output
Primary production in coastal lagoons supported by groundwater discharge and porewater fluxes infered from nitrogen and carbon isotope signatures	Aladin Andrisoa et al.	2019	2022-11-30	Mehana Muranaka	Field	Survey			noltii		La Palme lagoon		42.963	3.00366	Nutrients	Salinity			Plant & Community	Physiological Measures				Epiphytes										Salses-Leucate lagoon		42.8361	2.98188
Primary Productivity Temporal Fluctuations in a Nutrient-Rich Estuary due to Climate-Driven Events	Rodrigues & Pardal	2015	2022-12-17	Hannah Lyford	Field	Survey			noltii		Mondego Estuary, Portugal	40° 07′ 19″ N, 8° 50′ 33″ W	40.2886	-8.8425	Temperature	Nutrients	Drought		Plant, Community, & Environment	Physiological Measures	Photosynthetic Output	Shoot Survival		Macroalgae	Distribution	Organismal Diversity	Invertebrates	Water Column Dissolved Oxygen	Water Column Temperature	Water Column Nutrients
Production and ecology of eelgrass (Zostera marinal L.) in the Grevelingen estuary, the Netherlands, before and after the closure	Nienhaus & De Bree, 1977	1977	2021-11-09	Hannah Lyford	Field	Survey			marina	noltii	Grevelingen Estuary, Netherlands	51.708497166 N 4.01999992 E	51.7085	4.02	Anthropogenic Use	Habitat Fragmentation	Sediment		Plant, Community, & Environment	Shoot Density				Distribution				Water Column Temperature
Production Dynamics of the eelgrass, Zostera marina in two bay systems on the south coast of the Korean peninsula	Kun-Seop Lee, Sang Rul Park, Jung-Bae Kim	2005	2022-10-20	Mehana Muranaka	Field	Survey			marina		Koje Bay, south coast of the Korean Peninsula		34.9156	128.573	Temperature	Nutrients	Light		Plant	Growth	Shoot Density	Reproductive Output	Physiological Measures											Konsung Bay south coast of the Korean Peninsula		34.9885	128.023
Projecting future distribution of the seagrass Zostera noltii under global warming and sea level rise	Borja, Chust, Garmendia, Olsen, Valle, Wisz, del Campo	2014	2022-12-02	Hannnah Lyford	Field	Survey	Model	Management	noltii		Oka estuary, Bay of Biscay, France	43.43333,-2.69122	43.4333	-2.69122	Temperature	Hydrodynamics			Plant, Community, & Environment	Shoot Survival	Growth	Physiological Measures		Distribution				Water Column Temperature	Water Column Turbidity	Sediment Characteristics
Propagule composition regulates the success of an invasive seaweed across a heterogeneous seascape	Bulleri et al. 2019	2019	2021-10-29	Devin Ferguson	Field	Manipulative			mulleri		Pittwater, a sheltered embayment flanking Sydney's northern beaches, NSW, Australi		-33.6152	151.325	Invasion				Community					Macroalgae
Propagule risk in a marine foundation species: Seascape effects on Zostera marina seed predation	Carroll, Furman, Jackson, Hunter, & Peterson	2018	2023-01-16	Hannah Lyford	Field	Manipulative		Restoration	marina		Shinnecock Bay, Long Island, New York, USA	40.873465 N, 72.490126 W	40.8735	-72.4901	Habitat Fragmentation	Herbivory	Sediment		Plant, Community, & Environment	Shoot Survival	Shoot Density	Reproductive Output		Distribution	Invertebrates			Sediment Characteristics
Proteome Analysis Reveals Extensive Light Stress-Response Reprogramming in the Seagrass Zostera muelleri (Alismatales, Zosteraceae) Metabolism	Kumar et al.	2017	2022-12-07	Sarah Joy Bittick	Mesocosm	Manipulative			mulleri		Narrabeen Lagoon (34◦ 11′ 75′′South, 62◦ 68′ 134′′East), Sydney, NSW, Australia.		-34.2042	63.1706	Light				Plant & Environment	Physiological Measures	Photosynthetic Output							Water Column Salinity	Water Column Temperature	Water Column Turbidity
Quantification of damage to eelgrass (Zostera marina) beds and evidence-based management strategies for boats anchoring in San Francisco Bay	Julia J. Kelley, Daniel Orr, and John Y. Takekawa	2019	2022-11-23	Mehana Muranaka	Field	Survey			marina		richardson bay, california		37.8703	-122.496	Anthropogenic Use				Plant	Shoot Survival
Quantifying eelgrass habitat loss in relation to housing development and nitrogen loading in Waquoit Bay, Massachussetts	F. T. Short et al. 1996	1996	5/26 + 08/22/2022	Emma Guerrini Romano	Field	Survey			marina		Waquoit Bay, Massachussets, USA		41.5583	-70.5402	Nutrients	Anthropogenic Use			Community					Distribution	Macroalgae
Quantity and quality of organic matter (detritus) drives N-2 effluxes (net denitrification) across seasons, benthic habitats, and estuaries	Eyre, Maher, Squire	2013	2022-12-29	Hannah Lyford	Field	Survey			capricorni		Hastings River Estuary, SE Coast, Australia	31°25′S, 152° 50′E	-31.4167	152.833	Oxygen	Nutrients	Light	Sediment	Plant, Community, & Environment	Photosynthetic Output	Physiological Measures			Distribution	Organismal Diversity	Macroalgae		Water Column Turbidity	Water Column Dissolved Oxygen	Sediment Nutrients	Sediment Characteristics			Camden Haven, Southeast Australia	31°39′S, 152°47′E	-31.65	152.783	Wallis Lake, Southeast Australia	32°15′S, 152°28′E	-32.25	152.467
Reaction of an estuarine food web to disturbance: Lindeman's perspective	Niquil, Baeta, Marques, Chaalali, Lobry, & Patricio	2014	2022-12-17	Hannah Lyford			Model		noltii		Mondego Estuary, Portugal	40°07'N 08°49'W	40.1167	-8.81667	Nutrients	Hydrodynamics			Plant, Community, & Environment	Photosynthetic Output	Shoot Density	Growth	Shoot Survival	Chlorophyll A	Organismal Diversity	Invertebrates		Water Column Nutrients	Water Column Dissolved Oxygen	Sediment Characteristics
Realized niche width of a brackish water submerged aquatic vegetation under current environmental conditions and projected influences of climate chnage	Kotta et al.	2014	2022-09-22	Sarah Joy Bittick	Field	Survey			marina		Estonia, the Baltic Proper, the Gulf of Riga, the West Estonian Archipelago Sea, and the Gulf of Finland		58.9479	22.0603	Temperature	Hydrodynamics	Salinity	Light	Plant, Community, & Environment	Shoot Density				Chlorophyll A	Distribution			Water Column Turbidity				ice scouring		Gulf of Riga		58.1591	23.9466	Gulf of Finland		59.566	25.2035	West Estonian Archipelago Sea		58.7774	23.0807
Recolonization of Zostera marina following destruction caused by a red tide algal bloom: the role of new shoot recruitment from seed banks	Lee et al.	2007	2022-10-12	Sarah Joy Bittick	Field	Survey			marina		Jindong Bay, Korea	35 08	35.1419	128.637	Light				Plant & Environment	Shoot Density	Growth	Reproductive Output	Shoot Survival					Water Column Nutrients	Sediment Nutrients
Recording the occurrence of trophic level changes in the lagoon of Venice over the '90s	Adriano, Chiara, Sonia, and Antonio, 2005	2005	2022-10-12	Hannah Lyford	Field	Survey			marina		Venice Lagoon, Italy	45.3368° N, 12.2750° E	45.3368	12.275	Nutrients	Seagrass competition	Oxygen		Plant, Community, & Environment	Shoot Density	Growth			Chlorophyll A	Distribution	Organismal Diversity		Water Column Nutrients	Sediment Nutrients	Water Column Turbidity	Water Column Dissolved Oxygen
Recovery Dynamics of the Seagrass Zostera marina Following Mass Mortalities from Two Extreme Climatic Events	Johnson et. al	2021	2021-06-14	Roland	Field	Survey			marina		Dameron, Chesapeake Bay		37.8884	-76.2468	Temperature	Salinity			Plant	Reproductive Output								Water Column Temperature	Water Column Salinity					Hungars		37.5097	-75.9594	Poquoson		37.1597	-76.3401	Goodwin		37.2165	-76.4135	Browns Bay		37.2289	-76.4207
Recovery of a top predator mediates negative eutrophic effects on seagrass	Hughes, Van Dyke, Tinker, Marks, Johnson, & Wasson	2013	2022-12-02	Hannnah Lyford	Field	Manipulative		Management	marina		Elkhorn Slough, Central Coast, California, USA	36.8058° N, 121.7902° W	36.8058	-121.79	Anthropogenic Use	Nutrients	Herbivory		Plant, Community, & Environment	Growth	Shoot Density	Physiological Measures		Distribution	Macroalgae	Invertebrates	Organismal Diversity	Water Column Nutrients	Water Column Turbidity					Tomales Bay, California, USA	38.1713° N, 122.9128° W	38.1713	-122.913
Recovery of Danish Coastal Ecosystems After Reductions in Nutrient Loading: A Holistic Ecosystem Approach	Riemann et al.	2016	2022-12-05	Sarah Joy Bittick	Field	Survey			marina		45 estuarine and coastal sites across Denmark, 29 from Kattegat and Belt Sea		56.2055	10.8024	Nutrients	Light	Oxygen		Plant, Community, & Environment	Growth				Chlorophyll A	Macroalgae	Organismal Diversity		Water Column Nutrients	Water Column Dissolved Oxygen	Water Column Turbidity
Recovery of experimentally created gaps within a tropical Zostera capricorni (Aschers.) seagrass meadow, Queensland Australia	Rasheed	1999	2022-10-04	Sarah Joy Bittick	Field	Manipulative			capricornii		Ellie Point (16°53′S, 145°46′E		-16.8833	145.767	Habitat Fragmentation				Plant	Shoot Density	Growth	Reproductive Output
Recovery of the eelgrass Zostera marina following intense Manila clam Ruditapes philippinarum harvesting disturbance in China: The role and fate of seedlings	Le-Zheng Qin et al. 2016	2016	2022-06-14	Sadie Kenny	Field	Survey			marina		Moon Lake, Shandong Peninsula, China	37° 21′ N, 122° 32′ E	37.35	122.533	Aquaculture Impacts				Plant	Growth	Shoot Density	Reproductive Output						Water Column Temperature	Water Column Salinity
Recovery or decline of the northwestern Black Sea: A societal choice revealed by socio-ecological modelling	Langmead et al.	2009	2022-12-03	Sarah Joy Bittick			Model		marina	noltii	Black sea		44.5083	33.1421	Nutrients				Plant, Community, & Environment	Growth				Distribution	Organismal Diversity	Invertebrates	Macroalgae	Water Column Turbidity	Water Column Dissolved Oxygen	Water Column Nutrients		overfishing
Recovery pathways from small-scale disturbance in a temperate Australian seagrass	Smith, York, Macreadie, Keough, Ross, & Sherman	2016	2022-12-29	Hannah Lyford	Field	Manipulative			nigricaulis		northern Port Phillip Bay, Australia	-37.860239, 144.904100	-37.8602	144.904	Nutrients	Sediment	Anthropogenic Use	Habitat Fragmentation	Plant, Community, & Environment	Shoot Density	Reproductive Output	Shoot Survival	Physiological Measures	Distribution	Epiphytes			Water Column Nutrients	Sediment Characteristics	Water Column Temperature	Sediment Nutrients	herbivory		southern Port Phillip Bay, Australia	-38.359663, 144.886109	-38.3597	144.886	Swan Bay, Port Phillip Bay, Australia	-38.233737, 144.657864	-38.2337	144.658	Corio Bay, Port Phillip Bay, Australia	-38.127062, 144.423554	-38.1271	144.424	Geelong Arm, Port Phillip Bay, Australia	-38.122903, 144.603384	-38.1229	144.603
Recovery trajectories during state change from bare sediment to eelgrass dominance	McGlathery et al.	2012	2022-10-20	Sarah Joy Bittick	Field	Manipulative			marina		(37° 24’ 47’’ N, 75° 43’ 36’’ W, ‘Hog Island Bay’)		37.4131	-75.7267	Habitat Fragmentation	Hydrodynamics			Plant & Environment	Shoot Density	Growth	Shoot Survival	Physiological Measures					Sediment Characteristics	Sediment Nutrients					(37° 15’ 54’’ N, 75° 48’ 50’’ W, ‘South Bay’)		37.265	-75.8139
Recurrent and Persistent Brown Tide Blooms Perturb Coastal Marine Ecosystem	Cosper et al. 1987	1987	2021-06-17	Devin Ferguson	Field	Survey			marina		Islip Marina, Long Island, USA	40°42'N 73°12'W	40.7	-73.2	Invasion	Light	Nutrients		Plant	Growth														Blue Point, Rhode Island, USA	40°43'N 73°06'W	40.7167	73.1	Reeves Bay, Rhode Island, USA	40°55'N 72°36'W	40.9167	-72.6	New Suffolk, Rhode Island, USA	40°55'N 72°35'W	40.9167	-72.5833
Reduced Cover of Drifting Macroalgae Following Nutrient Reduction in Danish Coastal Waters	Ribergaard Rasmussen, Dromph, Göke, & Krause-Jensen	2015	2022-12-17	Hannah Lyford	Field	Survey			marina		inner fjords, Denmark	56.499786, 8.656832	56.4998	8.65683	Nutrients	Light			Plant, Community, & Environment	Shoot Density	Growth			Macroalgae	Distribution			Water Column Salinity	Water Column Temperature	Water Column Turbidity	Water Column Nutrients			outer fjords, Denmark	56.961560, 10.372363	56.9616	10.3724	Limfjorden, Denmark	56.835465, 9.140325	56.8355	9.14033	Open coast, Denmark	56.531125, 7.943331	56.5311	7.94333
Reduced genetic diversity in eelgrass transplantations affects both population growth and individual fitness	Williams, 2001	2001	2022-10-20	Hannah Lyford	Field	Manipulative			marina		Southern California, USA	33.1415° N, 117.3249° W	33.1415	-117.325	Genomics				Plant	Reproductive Output	Shoot Survival	Growth	Shoot Density											Chesapeake Bay, VA, USA	37.5214° N, 76.1050° W	37.5214	-76.105	Portsmouth, NH, USA	43.0718° N, 70.7626° W	43.0718	-70.7626
Reductions in distribution, photosynthesis, and productivity of eelgrass Zostera marina associated with oyster Crassostrea virginica aquaculture	Skinner, Courtenay, & McKindsey	2013	2022-11-30	Hannnah Lyford	Field	Manipulative			marina		Bay St. Simon North New Brunswick, Canada	47° 44.904’ N, 64° 48.840’ W	47.5817	-64.814	Anthropogenic Use	Aquaculture Impacts	Light	Nutrients	Plant, Community, & Environment	Growth	Physiological Measures	Shoot Density	Shoot Survival	Chlorophyll A	Invertebrates	Distribution		Water Column Nutrients	Water Column Turbidity	Sediment Nutrients	Sediment Characteristics			Bay St. Simon South New Brunswick, Canada	47° 43.706’ N, 64° 46.892’ W	47.7284	-64.7815	Tabusintac, New Brunswick, Canada	47° 20.914’ N, 64° 56.774’ W	47.3486	-64.9462	Neguac, New Brunswick, Canada	47° 13.912’ N, 65° 04.896’ W	47.2319	-64.0816	Richibuctou, New Brunswick, Canada	46° 43.106’ N, 64° 53.581’ W	46.7184	-64.893
Regional-Scale Differences in Eutrophication Effects on Eelgrass-Associated (Zostera marina) Macrofauna	Schmidt et al.	2017	2022-12-24	Sarah Joy Bittick	Field	Survey			marina		New Brunswick and PEI, canada		46.7627	-64.0749	Nutrients	Oxygen			Plant & Community	Shoot Density				Invertebrates	Organismal Diversity	Epiphytes	Macroalgae
Regional-scale effects of eutrophication on ecosystem structure and services of seagrass beds	Allison L. Schmidt et al.	2012	2022-11-23	Mehana Muranaka	Field	Survey			marina		estuaries in New Brunswuck, Canada		46.5283	-64.2341	Nutrients				Plant & Community	Growth	Physiological Measures			Chlorophyll A	Epiphytes	Macroalgae						Chlorophyll A		Estuaries in provinces of prince edward island canads		46.6114	-63.3963
Regulation of light attenuation and eelgrass Zostera marina depth distribution in a Danish embayment	B. Olesen 1996	1996	2022-05-21	Emma Guerrini Romano	Field	Survey			marina		Limfijord, Denmark	Site 1	56.5984	8.401	Light	Nutrients	Hydrodynamics		Community & Environment					Chlorophyll A	Distribution			Water Column Nutrients	Water Column Turbidity							56.5307	8.67094	Site 3		56.6577	8.7039	Site 4		56.9809	9.03899	Site 5		56.921	8.73412
Regulation of nitrate uptake by the seagrass Zostera marina during upwelling	José M. Sandoval-Gil et al.	2018	2022-11-30	Mehana Muranaka	Mesocosm	Manipulative			marina		San Quintin Bay, peninsula of baja california mexico		30.434	-115.948	Nutrients				Plant & Environment	Shoot Density	Growth	Physiological Measures						Water Column Nutrients
Relationship between distribution patterns of shoots and light conditions on population floor in Zostera marina population	Abe et al. 2008	2008	2021-06-10	Devin Ferguson	Field	Survey			marina		Matsunase region facing Ise Bay, Mie Prefecture, Japan	34°35'N 136°34'E	34.5833	136.567	Light				Plant & Community	Growth	Reproductive Output			Distribution
Relationship between land-use in the agro-forestry system of les Landes, nitrogen loading to and risk of macro-algal blooming in the Bassin d'Arcachon coastal lagoon (SW France)	De Wit et al. 2005	2005	2021-11-09	Devin Ferguson	Mesocosm	Manipulative			noltii		Bassin d'Arcachon coastal lagoon, SW France		44.6818	-1.11737	Nutrients				Plant, Community, & Environment	Physiological Measures				Macroalgae				Water Column Nutrients	Water Column Temperature
Relationship between nitrogen concentration, light, and Zostera marina habitat quality and survival in southeastern Massachusetts estuaries	Jennifer L. Benson, David Schlezinger, Brian L. Howes	2013	2022-11-02	Mehana Muranaka	Field	Manipulative			marina		southeastern massachusetts estuaries (19), clarks cove new bedford		41.572	-70.9052	Light	Nutrients			Plant & Community	Shoot Density	Growth											Chlorophyll A
Relationship between wind and seagrass meadows in a non-tidal eutrophic lagoon studied by a Wave Exposure Model (WEMo)	Fabrizio Rubegni et al. 2013	2013	2022-10-02	Sadie Kenny	Field	Survey			noltii		Non-tidal eutrophic lagoon (Orbetello Lagoon, Tuscany, Italy)		42.4447	11.2029	Hydrodynamics				Plant, Community, & Environment	Growth				Distribution				Sediment Characteristics	Water Column Temperature	Water Column Salinity
Relationships between aquatic vegetation and water turbidity: A field survey across seasons and spatial scales	Austin, Hansen, Donadi, & Eklof	2017	2022-12-29	Hannah Lyford			Model		marina		Baltic Sea, Sweden	58.803323, 17.587338	58.8033	17.5873	Nutrients	Sediment	Light	Salinity	Plant, Community, & Environment	Shoot Density	Growth	Physiological Measures		Distribution	Organismal Diversity	Macroalgae		Water Column Turbidity	Sediment Characteristics	Water Column Nutrients	Water Column Salinity
Relationships between bed age, bed size, and genetic structure in Chesapeake Bay (Virginia, USA) eelgrass (Zostera marina L.)	Rhode & Duffy, 2004	2004	2022-10-22	Hannah Lyford	Field	Survey			marina		Chesapeake Bay, Virginia, USA	37.5214° N, 76.1050° W	37.5214	-76.105	Genomics	Habitat Fragmentation	Nutrients		Plant & Community	Shoot Density	Physiological Measures	Reproductive Output	Shoot Survival	Distribution
Relationships between estuarine modification and leaf litter decomposition vary with latitude	Ainley & Bishop	2015	2022-12-17	Hannah Lyford	Field	Manipulative			mulleri		Sandon River, New South Wales (NSW), Australia.	-29.678692, 153.314500	-29.6787	153.315	Nutrients	Temperature	Anthropogenic Use		Plant, Community, & Environment	Physiological Measures	Shoot Density			Distribution	Organismal Diversity	Invertebrates		Water Column Nutrients	Water Column Temperature					Wooli River, New South Wales (NSW), Australia.	-29.853622, 153.256405	-29.8536	153.256	Moonee Creek, New South Wales (NSW), Australia.	-30.206963, 153.158018	-30.207	153.158	Boambee Creek, New South Wales (NSW), Australia.	-30.348680, 153.100704	-30.3487	153.101	Minamurra River, New South Wales (NSW), Australia.	-34.622861, 150.855633	-34.6229	150.856
Relationships between heavy metal concentrations in sediments and eelgrass and environmental variables (Zostera marina, Thau Lagoon, France)	de Casabianca et al. 2004	2004	2021-06-16	Caroline Thorpe	Field	Survey			marina		Thau lagoon, Mediterranean France	43° 26' 48.7" N, 3° 39' 42.6" E	43.4469	3.66183	Toxins				Plant & Environment	Shoot Density	Growth							Water Column Temperature	Water Column Salinity	Water Column Nutrients	Sediment Nutrients
Relative effects of nutrient enrichment and grazing on epiphyte-macrophyte (Zostera marina L.) dynamics	Neckles et al. 1993	1993	2021-05-19	Devin Ferguson	Mesocosm	Manipulative			marina		Greenhousee on York River estuary of Chesapeake Bay	37°15'N 76°30'W	37.25	-76.5	Nutrients	Herbivory			Plant & Community	Shoot Density	Growth			Epiphytes	Macroalgae	Organismal Diversity
Relative Impacts of Natural Stressors on Life History Traits Underlying Resilience of Intertidal Eelgrass (Zostera marina L.)	S Yang et. al 2013	2013	2022-10-28	Carolina Salcedo	Mesocosm	Manipulative			marina		Southern Salish Sea in the Pacific North West, Washington, USA	48°20'59.99" N -123°10'60.00" W	48.35	-123.183	Sediment				Plant	Shoot Density	Reproductive Output
Relative importance of grazing and nutrient controls of macroalgal biomass in three temperate shallow estuaries	Hauxwell et al., 1998	1998	2022-05-30	Hannah Lyford	Field	Manipulative			marina		Waiquot Bay, Massachusetts, USA	41.5626° N, 70.5220° W	41.5626	-70.522	Nutrients	Light			Plant, Community, & Environment	Growth				Macroalgae	Epiphytes	Invertebrates	Organismal Diversity	Water Column Nutrients
Relative importance of trophic interactions and nutrient enrichment in seagrass ecosystems: A broad-scale field experiment in the Baltic–Skagerrak area	Baden et al. 2010	2010	2021-06-17	James Roe	Field	Manipulative			marina		Swedish NW coast (Gullmar Fjord) in the Skagerrak	58°15'33.2"N 11°25'05.2"E	58.2592	11.4181	Nutrients	Herbivory			Plant & Community	Growth				Macroalgae										Swedish SE coast (Kalmar Sound)	56°39'45.2"N 16°24'49.1"E	56.6626	16.4136	Finnish SW coast (Gulf of Finland) in the Baltic Sea	59°41'44.7"N 23°47'47.2"E	59.6957	23.7964
Relative performance of eelgrass genotypes shifts during an extreme warming event: disentangling the roles of multiple traits	DuBois, Abbott, Williams, & Stachowicz	2019	2023-01-16	Hannah Lyford	Field	Manipulative	Model		marina		Bodega Harbor, Bodega Bay, CA, USA	38.3244 N, -123.0386 W	38.3244	-123.039	Genomics	Temperature	Light		Plant & Environment	Shoot Density	Growth	Physiological Measures	Photosynthetic Output					Water Column Turbidity	Water Column Temperature	Water Column Dissolved Oxygen
Replacement of native seagrass with invasive algal detritus: impacts to estuarine sediment communities	Bishop and Kelaher	2013	2022-10-05	Sarah Joy Bittick	Field	Manipulative			capricornii		Quibray Bay (33°59′S, 151°12′E), New South Wales (NSW), Australia.		-33.9833	151.2	Invasion				Community					Invertebrates	Chlorophyll A	Organismal Diversity
Reproduction dynamics of eelgrass (Zostera marina L.) populations in Ise-Mikawa Bay, central Honshu, Japan	T. Yoshida et al. 2009	2009	2002-05-19	Emma Guerrini Romano	Field	Survey			marina		Ise-Mikawa Bay, Central Honshu Island, Japan	34°51'59" N 136°51'05"E	34.7667	137.017	Habitat Fragmentation	Hydrodynamics	Genomics		Plant	Growth	Reproductive Output														34°48'15"N, 137°15'24"E			Tarumi	34°51'59"N, 136°			Kosugaya
Reproduction of the eelgrass Zostera marina at the species southern distributional limit in the Eastern Atlantic	Cabaco and Santos	2009	2022-12-01	Sarah Joy Bittick	Mesocosm	Manipulative			marina		Ria Formosa lagoon. (Fuzeta, Culatra, Barrinha and Armona)		36.9963	-7.97187	Temperature				Plant	Reproductive Output	Growth	Shoot Survival
Reproductive properties of Zostera marina and effects of sediment type and burial depth on seed germination and seedling establishment	Ming Wang et al.	2016	2022-11-06	Mehana Muranaka	Field	Survey			marina		Lidao Bay, shandong Peninsula in north china		37.2471	122.591	Sediment				Plant	Reproductive Output
Resilience of Hydrobia ulvae populations to anthropogenic and natural disturbances	Cardoso et al, 2005	2005	2022-10-20	Hannah Lyford	Field	Manipulative			noltii		Mondego Estuary, Portugal	40° 08'N, 8° 50'W	41.3333	-80.8333	Nutrients	Light			Plant, Community, & Environment	Shoot Density	Growth			Distribution	Organismal Diversity			Water Column Nutrients	Water Column Turbidity
Resilience of Zostera muelleri seagrass to small-scale disturbances: the relative importance of asexual versus sexual recovery	Macreadie, York, Sherman	2014	2022-12-02	Hannnah Lyford	Field	Manipulative			mulleri		Sunshine, Lake Macquarie; Australia	33°06′29.82″S, 151°33′52.31″E	-33.1083	151.565	Habitat Fragmentation	Genomics			Plant & Community	Reproductive Output	Shoot Survival	Shoot Density	Physiological Measures	Seagrass competition	Organismal Diversity									Valentine, Lake Macquarie; Australia	32°59′46.04″S, 151°37′56.08″E	-32.9961	151.632	Wangi, Lake Macquarie; Australia	33°03′51.54″S, 151°34′59.70″E	-33.0643	151.583	Point Wolstoncroft, Lake Macquarie, Australia	33°07′07.61″S, 151°35′20.95″E	-33.1188	-151.589
Resilience of Zostera noltii to burial or erosion disturbances	Han et al. 2021	2021	2021-06-24	Devin Ferguson	Mesocosm	Manipulative			noltii		Slikken van Viane tidal flat, eastern Scheldt, SW Netherlands	51°36'N 03°59'E	51.6	3.98333	Sediment				Plant, Community, & Environment	Growth	Shoot Density			Distribution				Sediment Characteristics
Resource allocation and sucrose mobilization in light-limited eelgrass Zostera marina	Alcoverro et al., 1999	1999	2022-05-30	Hannah Lyford	Mesocosm	Manipulative			marina		Del Monte Beach, Monterey, California, USA	36°30'40" N, 121°52'30" W	36.5111	-121.875	Light	Carbon			Plant & Community	Physiological Measures	Growth	Photosynthetic Output		Chlorophyll A
Resource-restricted growth of eelgrass in New York estuaries: light limitation, and alleviationof nutrient stress by hard clams	John Carroll et al. 2008	2008	2022-06-01	Sadie Kenny	Field	Manipulative			marina		Long Island estuaries (NY, USA)	40° 50.52’ N, 72° 28.70’ W	40.842	-72.4783	Light	Nutrients			Plant	Growth	Shoot Density	Physiological Meaures
Resources competition between Ulva rigida and Zostera marina: a quantitative approach applied to the Lagoon of Venice	Bocci & Coffaro, 1997	1997	2022-09-05	Hannah Lyford	Field	Survey			marina		Lagoon of Venice, Italy	45.3368° N, 12.2750° E	45.3368	12.275	Light	Nutrients	Hydrodynamics		Plant, Community, & Environment	Shoot Density				Distribution	Macroalgae			Water Column Nutrients	Sediment Nutrients	Water Column Turbidity
Respiratory oxygen consumption in the seagrass Zostera marina varies on a diel basis and is partly affected by light	Rasmusson et al	2017	2022-12-22	Hannah Lyford	Field	Manipulative			marina		Kristineberg, Fiskebäckskil, Swedish west coast	58.249852 N, 11.445053 E	58.2499	11.4451	Light	Genomics			Plant & Environment	Photosynthetic Output	Physiological Measures							Water Column Dissolved Oxygen	Water Column Turbidity					Stazione Zoologica Anton Dohrn (SZN), Naples, Italy	40.832114 N, 14.233697 E	40.8321	14.2337
Response and Recovery of Eelgrass (Zostera marina) to Chronic and Episodic Light Disturbance	Wong et al. 2020	2020	2021-05-17	Devin Ferguson	Mesocosm	Manipulative			marina		Port l'Hebert Bay, Nova Scotia, Canada	43°52′04″N 64°57′43″W	43.8678	-64.9619	Light				Plant	Shoot Density	Growth	Plant Tissue Nutrients
Response of eelgrass (Zostera marina) to an adjacent Olympia oyster restoration project	Briley	2015	2023-01-05	Sarah Joy Bittick	Field	Manipulative			marina		Jack Dunster Marine Reserve, Long Beach		33.7621	-118.12	Aquaculture Impacts	Light			Plant, Community, & Environment	Shoot Density	Growth			Epiphytes				Water Column Temperature	Water Column Turbidity
Response of eelgrass Zostera marina to CO2 enrichment: possible impacts of climate change and potential for remediation of coastal habitats	Sherry L. Palacios & Richard C. Zimmerman 2007	2007	2021-06-17	Sadie Kenny	Mesocosm	Manipulative			marina		Seal Bend in Elkhorn Slough, CA, USA	36.8153° N, 121.7658° W	36.8153	-121.766	Carbon	Light			Plant & Environment	Growth	Shoot Density	Physiological Meaures	Photosynthetic Output					Water Column Salinity				CO2 enrichment stressor with light variations. ALSO MEASURES REPORODUCTIVE OUTPUT
Response of foundation macrophytes to near-natural simulated marine heatwaves	Saha et al. 2019	2019	2021-06-02	Devin Ferguson	Mesocosm	Manipulative			marina		Kiel Outdoor Benthocosm at GEOMAR Helmholtz Centre, Kiel Fjord, southwester Baltic Sea	54°19'N 10°10'E	54.3167	10.1667	Temperature				Plant & Community	Photosynthetic Output	Growth			Microbial Diversity
Response of the eelgrass (Zostera marina L.) to combined effects of high temperatuers and the herbicide, atrazine	Gao et al. 2017	2017	2021-12-06	Devin Ferguson	Mesocosm	Manipulative			marina		Sanggou Bay Rongcheng, Weihai, China		37.0422	122.568	Temperature	Herbicides			Plant	Photosynthetic Output	Physiological Measures	Growth
Response to experimental warming in northern eelgrass populations: comparison across a range of temperature adaptations	P. Beca-Carretero et al. 2018	2018	2022-10-23	Sadie Kenny	Mesocosm	Manipulative			marina		Kobbe Fjord, Greenland	64°09’N, 51°33’W	64.15	51.55	Temperature	Light			Plant	Growth	Physiological Measures	Photosynthetic Output												Kapisillit, Greenland	64° 28’ N, 50° 13’ W	64.4667	50.2167	Århus Bay, Denmark	56°23’N, 16°33’E	56.3833	16.55
Response to lowered nutrient discharges in the coastal waters around the island of Funen, Denmark	Rask, Pederson, & Jensen, 1999	1999	2022-05-30	Hannah Lyford	Field	Survey		Management	marina		Funen Island Coast, Denmark	55.3291° N, 10.2353° E	55.3291	10.2353	Nutrients	Light			Plant, Community, & Environment	Growth				Macroalgae				Water Column Dissolved Oxygen	Water Column Turbidity
Responses of coastal lagoon plant communities to different forms of nutrient enrichment—a mesocosm experiment	Taylor et al., 1995	1995	2022-04-10	Hannah Lyford	Mesocosm	Manipulative			marina		Point Judith Pond Lagoon, Rhode Island, USA	41.3998° N, 71.5056° W	41.3998	-71.5056	Nutrients				Plant, Community, & Environment	Physiological Measures	Growth	Shoot Density		Chlorophyll A	Epiphytes	Macroalgae		Water Column Turbidity	Water Column Nutrients
Responses of Coastal Lagoon Plant Communities to Levels of Nutrient Enrichment: A Mesocosm Study	Taylor et al. 1999	1999	2021-06-23	James Roe	Mesocosm	Manipulative			marina		Point judith Pond lagoon, Rhode Island, USA	41°23'53.6"N 71°30'21.2"W	41.3982	-71.5059	Nutrients				Plant & Community	Growth	Shoot Density			Chlorophyll A	Macroalgae	Epiphytes
Responses of four Indo-West Pacific seagrass species to shading	C. J. Collier et al. 2012	2012	6/11 + 08/22/2022	Emma Guerrini Romano	Mesocosm	Manipulative			mulleri		Magnetic Island, off Coast of Townsville, Queensland, AUS		-19.1098	146.855	Light				Plant & Community	Physiological Measures	Growth	Photosynthetic Output	Shoot Density					Water Column Nutrients
Responses of primary producers to mouth closure in the temporarily open/closed Great Brak Estuary in the warm-temperate region of South Africa	Nunes & Adams	2014	2022-12-07	Hannah Lyford	Field	Manipulative	Model		capensis	japonica	Great Brak Estuary, South Africa	34°03′23″ S, 22°14′18″ E	-34.0564	22.2383	Anthropogenic Use	Nutrients	Hydrodynamics		Plant, Community, & Environment	Physiological Measures	Growth	Shoot Density		Chlorophyll A	Macroalgae	Distribution	Seagrass competition	Water Column Salinity	Water Column Dissolved Oxygen	Water Column Nutrients	Water Column Turbidity
Responses of two Mediterranean seagrasses to experimental changes in salinity	Fernández-Torquemada & Sánchez-Lizaso 2011	2011	2021-06-12	Devin Ferguson	Mesocosm	Manipulative			noltii		mixed shallow meadow at Almadraba Beach, Alicante, SE Spain	38°21'N 0°26'W	38.35	-0.433333	Salinity				Plant & Community	Growth	Shoot Density			Seagrass competition
Responses of Very Shallow Marine Ecosystems to Nutrient Enrichment	Nixon et al. 2001	2001	2022-02-23	Devin Ferguson	Mesocosm	Manipulative			marina		West Passage of Narrangansett Bay, Rhode Island		41.623	-71.3506	Nutrients				Plant, Community, & Environment	Growth	Shoot Density	Physiological Measures		Chlorophyll A				Water Column Nutrients
Responses of eelgrass Zostera marina seedlings to reduced light	Joanne C. Bintz & Scott W. Nixon 2001	2001	2021-06-15	Sadie Kenny	Mesocosm	Manipulative			marina		Narragansett Bay, Rhode Island, USA	41° N, 71° W	41	-71	Light				Plant & Environment	Shoot Density	Growth	Photosynthetic Output	Physiological Meaures					Water Column Dissolved Oxygen
Restoration enhances denitrification and DNRA in subsurface sediments of Zostera marina seagrass meadows	Aoki and McGlathery	2018	2022-10-13	Sarah Joy Bittick	Field	Manipulative			marina		South Bay, Virginia	37.249816, -75.868942	37.2498	-75.8689	Habitat Fragmentation	Sediment	Microbiome		Plant, Community, & Environment	Physiological Measures	Growth	Shoot Density		Chlorophyll A	Microbial Diversity			Sediment Characteristics	Sediment Nutrients
Revealing hydrogen peroxide as an external stressor in macrophyte-dominated coastal ecosystems	Twigg et al. 2020	2020	2021-06-07	Devin Ferguson	Mesocosm	Survey			mulleri		Otago Harbour, New Zealand	45°50'S 170°05'E	-45.8333	170.083	Oxygen				Plant & Community	Photosynthetic Output				Microbial Diversity
Reversal of intraspecific interactions by an ecosystem engineer leads to variable seedling success along a stress gradient	Yang, HilleRisLanbers, & Ruesink	2016	2022-12-22	Hannah Lyford	Field	Manipulative		Restoration	marina		Willapa Bay, WA, USA	46.522° N, 124.014° W	46.522	-124.014	Hydrodynamics	Habitat Fragmentation	Seagrass competition		Plant & Community	Shoot Survival	Shoot Density	Physiological Measures		Distribution	Seagrass competition
Reviewing the far-reaching ecological impacts of human-induced terrigenous sedimentation on shallow marine ecosystems in a northern-New Zealand embayment	Booth 2020	2020	2021-10-29	Devin Ferguson	Field	Survey			mulleri		shallow marine ecosystems of a nothern-New Zealand embayment, the Bay of Islands		-35.2	174.167	Sediment				Community					Organismal Diversity
Reviewing the far-reaching ecological impacts of human-induced terrigenous sedimentation on shallow marine ecosystems in a northern-New Zealand embayment	Booth	2020	2023-02-06	Sarah Joy Bittick	Field	Survey	Review		mulleri		New Zealand embayment, the Bay of Islands (35° 12′ S, 174° 10′ E)		-35.2	174.167	Sediment				Community					Distribution	Invertebrates
Rhizosphere microbial community structure and function of Zostera japonica in the distribution area of seagrass beds in the Yellow Sea and Bohai Sea	Zhou et al.	2019	2022-12-06	Sarah Joy Bittick	Field	Survey			japonica		Dongying, Weihai, and Dalian city	39.23°N, 122.70° E)	39.23	177.7	Microbiome				Community & Environment					Microbial Diversity				Sediment Characteristics	Sediment Nutrients
Rhizosphere O-2 dynamics in young Zostera marina and Ruppia maritima	Jovanovic, Pedersen, Larsen, Kristensen, & Glud	2015	2022-12-17	Hannah Lyford	Mesocosm	Manipulative			marina		Odense Fjord, Denmark	55.48118°N, 10.61002°E	55.4812	10.61	Light	Oxygen			Plant, Community, & Environment	Physiological Measures	Photosynthetic Output			Seagrass competition	Distribution			Water Column Dissolved Oxygen	Water Column Turbidity	Sediment Characteristics
Risk posed by the antifouling agent Irgarol 1051 to the seagrass, Zostera marina	A Scarlet et. al 1998	1998	2022-09-22	Carolina Salcedo	Mesocosm	Manipulative			marina		Yealm Estuary, UK during low water spring tides (.5 m depth), around midday	50° 18.55' N 4° 3.85' W	50.3	-4.06667	Herbicides				Plant	Growth	Photosynthetic Output	Physiological Measures
Roberts Bank: Ecological crucible of the Fraser River estuary	Sutherland et al.	2013	2022-12-13	Sarah Joy Bittick	Field	Survey			japonica	marina	Roberts Bank, Bc		49.0337	-123.118	Anthropogenic Use				Plant, Community, & Environment	Shoot Density				Invertebrates	Organismal Diversity	Chlorophyll A		Sediment Characteristics
ROBUST: The ROle of BUffering capacities in STabilising coastal lagoon ecosystems	de Wit et al.	2001	2022-10-21	Sarah Joy Bittick			Model		noltii		the Bassin d’Arcachon		44.6728	-1.11116	Nutrients	Microbiome	Oxygen	Sediment	Plant, Community, & Environment	Physiological Measures				Macroalgae	Organismal Diversity	Microbial Diversity		Sediment Characteristics						Sacca di Goro	(44°47′–44°50′N and 12°15′–12°20′E)	44.7833	12.25	Valle Smarlacca	44°20′N, 12°10′E	44.3333	12.1667
Role of eelgrass in the coastal filter of contrasitng Baltic sea environments	E. Asmala et al. 2019	2019	2022-12-27	Emma Guerrini Romano	Field	Manipulative			marina		Roskilde Fjord, Baltic Sea		55.6913	12.0889	Salinity	Nutrients			Plant & Community	Shoot Density	Shoot Survival							Water Column Dissolved Oxygen	Water Column Temperature	Water Column Nutrients				Tvärminne archipelago		59.9413	23.7256
Role of lipids in molecular thermoadaptaion mechanisms of seagrass Zostera marina	S. N. Goncharova et al. 2000	2000	2022-07-01	Emma Guerrini Romano	Mesocosm	Manipulative			marina		Possiet Bay, Sea of Japan, Russia		42.5859	130.825	Temperature				Plant	Physiological Measures
Role of salinity in the susceptibility of eelgrass Zostera marina to the wasting disease pathogen Labyrinthula zosterae	McKone & Tanner 2009	2009	2022-01-21	Devin Ferguson	Mesocosm	Manipulative			marina		mouth of Big Annemessex River, Maryland, USA		38.0274	-75.8471	Salinity	Pathogens			Plant	Growth	Physiological Measures
Role of daily light period in the depth distribution of zostera-marina(eelgrass)	William C. Dennison & Randall S. Alberte 1985	1985	2021-06-04	Sadie Kenny	Field	Manipulative			marina		Great Harbor, Woods Hole, MA	40° 31.5' N, 70° 40.5' W	40.525	-70.675	Light				Plant	Photosynthetic Output	Physiological Meaures	Growth	Shoot Density
Salinity and temperature significantly influence seed germination, seedling establishment, and seedling growth of eelgrass Zostera marina L.	Shaochun Xu et al. 2016	2016	2021-06-22	Sadie Kenny	Mesocosm	Manipulative			marina		Swanlake Lagoon, NE of Rongcheng City, northern China	37° 20' 58.7"' N, 122° 34' 26.9" E	37.3496	122.802	Salinity	Temperature			Plant	Growth	Physiological Meaures
Sea bottom characteristics affect depth limits of eelgrass Zostera marina	Carstensen, Christensen, Dalsgaard, Fossing, Krause-Jensen, Nielsen, & Rasmussen	2011	2022-11-29	Hannnah Lyford	Field	Survey			marina		Limfjorden, Denmark	56.7362° N, 8.4920° E	56.7362	8.492	Light	Sediment	Toxins	Nutrients	Plant, Community, & Environment	Physiological Measures	Shoot Density	Growth		Distribution				Water Column Turbidity	Sediment Characteristics	Sediment Nutrients				Aarhus Bay, Denmark	56.1524° N, 10.3287° E	56.1524	10.3287	Horsens Fjord, Denmark	55.8566° N, 10.0259° E	55.8566	10.0259	Little Belt, Denmark	55.3855° N, 9.7220° E	55.3855	9.722	Odense Fjord, Denmark	55.4931° N, 10.5413° E	55.4931	10.5413
Sea ice effects on benthic community structure and biogeochemical processes in seagrass landscapes	Pascal et al.	2020	2023-02-06	Sarah Joy Bittick	Field	Manipulative			marina		Manicouagan Peninsula	(Qu´ebec; 49◦5′ 36′′ N, 68◦12′ 44′′ W).	49.0933	-68.2122	Ice Scouring				Plant, Community, & Environment	Growth				Organismal Diversity	Microbial Diversity	Chlorophyll A		Sediment Characteristics	Sediment Nutrients
Sea Ice Increases Benthic Community Heterogeneity in a Seagrass Landscape	Pascal et al. 2020	2020	June 9th	Madi Firnett	Field	Survey			marina		Manicouagan Peninsula, Quebec	49° 5′ 36″N, 68° 12′ 44″W	49.0933	-68.2122	Hydrodynamics				Plant & Environment	Shoot Density	Growth			Organismal Diversity				Sediment Characteristics	Sediment Nutrients
Seagrass (Zostera capensis) bed development as a predictor of size structured abundance for a ubiquitous estuary-dependent marine fish species	Wasserman et al.	2020	2022-11-29	Sarah Joy Bittick	Field	Survey			capensis		The Kariega Estuary	h (33�390 3700S; 26�380 4600E)	-33.6603	26.6461	Hydrodynamics	Temperature	Salinity	Light	Plant, Community, & Environment	Growth				Microbial Diversity	Distribution			Water Column Salinity	Water Column Turbidity	Water Column Temperature	Water Column pH	flooding
Seagrass colonization: Knock-on effects on zoobenthic community, populations and individual health	Tu Do, Montaudouin, Lavesque, Blanchet, Guyard	2011	2022-12-01	Hannnah Lyford	Field	Manipulative			noltii		Arcachon Bay, France	44° 40′N, 1° 10′W	44.6667	-1.16667	Sediment	Nutrients	Invasion		Plant, Community, & Environment	Shoot Density	Growth	Physiological Measures		Distribution	Invertebrates	Organismal Diversity		Sediment Characteristics	Sediment Nutrients
Seagrass Demographic and Spatial Habitat Characterization in Little Egg Harbor, New Jersey, Using Fixed Transects	Kennish, Haag, Sakowicz	2008	2022-11-29	Hannnah Lyford	Field	Survey			marina		Little Egg Harbor, New Jersey, USA	39.6205° N, 74.3192° W	39.6205	-74.3192	Light	Nutrients	Anthropogenic Use		Plant, Community, & Environment	Growth	Shoot Density	Shoot Survival	Physiological Measures	Macroalgae	Distribution	Organismal Diversity		Sediment Nutrients	Water Column Nutrients	Water Column Turbidity	Sediment Characteristics
Seagrass depth range and water quality in southern Moreton bay, Queensland, Australia	Abal & Dennison, 1996	1996	2022-09-05	Hannah Lyford	Field	Survey			capricorni		Southern Moreton Bay, Queensland, Australia	27.6394° S, 153.3719° E	-27.6394	153.372	Light	Nutrients			Community & Environment					Distribution	Chlorophyll A			Water Column Nutrients	Water Column Turbidity	Water Column Dissolved Oxygen
Seagrass ecophysiological performance under ocean warming and acidification	Repolho et al. 2017	2017	2021-10-06	James Roe	Mesocosm	Manipulative			noltii		Caldeira de Tróia, Portugal	38°29′ 18.42′′N; 8°53′ 15.12′′ W	38.4885	-8.88753	Temperature	Acidification			Plant	Shoot Density	Physiological Measures	Photosynthetic Output
Seagrass epiphytic assemblages are strong indicators of agricultural discharge but weak indicators of host features	Prado	2018	2023-01-01	Hannah Lyford	Field	Survey			noltii		Alfacs Bay, Catalonia, Spain	40.610221, 0.669240	40.6102	0.66924	Nutrients	Hydrodynamics	Epiphytes	Salinity	Plant, Community, & Environment	Shoot Density				Distribution	Organismal Diversity	Macroalgae	Epiphytes	Water Column Nutrients	Water Column pH	Water Column Salinity	Water Column Turbidity
Seagrass feeding choices and digestive strategies of the herbivorous fish Sarpa salpa	Erzini & Goldenberg	2014	2022-12-02	Hannnah Lyford	Field	Survey		Restoration	noltii	marina	Ria Formosa Lagoon, Portugal	37°16"N; 7° 59' 16" W	37.0044	-7.98778	Herbivory				Plant & Community	Shoot Density	Physiological Measures			Organismal Diversity	Seagrass competition
Seagrass leaf element content: A global overview	Vonk et al.	2018	2022-10-04	Sarah Joy Bittick	Field	Survey	Review		noltii		St Jacut Haas plage	N 48° 36.074', W 002° 11.501'	48.6012	-2.19168	Nutrients				Plant	Physiological Measures														Sylt Rantum-Samoa	N 54° 49.518', E 008° 17.460'	54.8253	8.291	Banc d'Arguin	N 19° 52.352', W 016° 17.082'	19.8725	-16.2847	Viane West-Zuid	N 51° 37.108', E 004° 01.031'	51.6185	4.01718
Seagrass Proliferation Precedes Mortality during Hypo-Salinity Events: A Stress-Induced Morphometric Response	Catherine J. Collier et al. 2014	2014	2022-06-06	Sadie Kenny	Mesocosm	Manipulative			mulleri		Pelican Banks, Gladstone Harbour, Australia	23°45.895' S, 151°18.244' E	-23.7649	151.304	Salinity				Plant & Community	Shoot Density	Growth	Reproductive Output		Distribution
Seagrass recovery in the Delmarva Coastal Bays, USA	Orth et al.	2006	2022-10-24	Sarah Joy Bittick	Field	Survey			marina		Delmarva Coastal Bays, N: Assowoman		38.4464	-75.0763	Nutrients	Light	Habitat Fragmentation		Plant, Community, & Environment	Growth	Reproductive Output			Seagrass competition	Distribution	Chlorophyll A		Water Column Nutrients	Water Column Turbidity					Delmarva Bays: Cintoteague		37.9963	-75.3146	Southern Delmarva		37.2692	-75.8085
Seagrass resilience to waterfowl grazing in a temperate estuary: A multi-site experimental study	Dos Santos et al. 2013	2013	2021-06-16	James Roe	Field	Manipulative			mulleri		Tauranga Harbour, North Island of New Zealand	37° 41′S 176° 10′E	-37.6833	176.167	Herbivory				Plant	Growth	Shoot Density
Seagrass restoration reestablishes the coastal nitrogen filter through enhanced burial	Aoki, McGlathery, & Oreska	2020	2023-01-16	Hannah Lyford	Field	Manipulative		Restoration	marina		South Bay, VA, USA	37.269852, −75.810716	37.2699	−75.810716	Nutrients	Anthropogenic Use	Sediment		Plant & Environment	Physiological Measures	Shoot Density	Photosynthetic Output						Water Column Nutrients	Sediment Nutrients	Water Column Turbidity	Sediment Characteristics
Seagrass- Sediment Feedback: An Exploration Using a Non-recursive Structural Equation Model	Eelke O. Folmer et al.	2012	2022-10-29	Mehana Muranaka	Mesocosm	Manipulative			noltii		Iwik region, intertidal area of the Banc d' Arguin off the coast of Mauritania		19.8691	-16.2885	Nutrients	Sediment	Hydrodynamics		Plant & Environment	Growth								Water Column Turbidity
Seagrass sensitivity to collapse along a hydrodynamic gradient: evidence from a pristine subtropical intertial ecosystem	El-Hacen M. El-Hacen et al.	2019	2022-12-01	Mehana Muranaka	Field	Manipulative			noltii		Parc National du Banc d'Arguin Mauritania		19.7959	-16.3117	Nutrients	Hydrodynamics			Plant & Community	Growth	Physiological Measures			Distribution	Macroalgae
Seagrass tolerance to herbivory under increased ocean temperatures	Garthwin et al. 2014	2014	2021-06-16	Devin Ferguson	Field	Manipulative			mulleri		Myuna Bay, Lake Macquarie, New South Wales, Australia	33°03'58.5"S 151°32'48.1"E	-33.0662	151.547	Temperature	Herbivory			Plant	Growth	Shoot Density	Physiological Measures												Wangi, Lake Macquarie, New South Wales, Australia	33°03'54.2"S 151°34'57.6"E	-33.0651	151.583	Sunshine, Lake Macquarie, New South Wales, Australia	33°06'27.9"S 151°33'53.5"E	-33.1078	151.565	Rathmines, Lake Macquarie, New South Wales, Australia	33°02'30.15"S 151°35'50.13"E	-33.0417	151.597
Seagrass wasting disease along a naturally occurring salinity gradient	Jakobsson-Thor, Pavia, & Toth	2019	2023-01-11	Hannah Lyford	Mesocosm	Manipulative			marina		Asko, Sweden	58°49.443’ N, 17°37.682’ E	58.824	17.628	Pathogens	Salinity			Plant, Community, & Environment	Shoot Density	Shoot Survival	Physiological Measures		Distribution	Microbial Diversity			Water Column Salinity						Vastervik, Sweden	57°44.004’ N, 16°43.007’ E	57.7334	16.7168	Kalmarsund, Sweden	56°38.986’ N, 16°27.605’ E	56.6498	16.4601	Ahus, Sweden	55°56.064’ N, 14°19.469’ E	55.9344	14.3245	Trelleborg, Sweden	55°22.035’ N, 13°10.018’ E	55.3672	13.167
Seagrass wasting disease varies with salinity and depth in natural Zostera marina populations	S. Jakobsson-Thor et al. 2018	2018	2022-06-26	Emma Guerrini Romano	Field	Manipulative			marina		Swedish West Coast, Site 1		58.8988	11.1408	Pathogens	Salinity			Plant & Community	Physiological Measures																58.8789	11.1317	Site 3		58.8566	11.1367	Site 4		59.0816	11.2154	Site 5		59.0806	11.2156
Seagrass wasting disease: Nitrate enrichment and exposure to a herbicide (Diuron) increases susceptibility of Zostera marina to infection	Hughes et al.	2018	2022-10-03	Sarah Joy Bittick	Mesocosm	Manipulative			marina		Leigh-on-Sea in the Thames Estuary, United Kingdom (51.53° N, 0.65° E)		51.8833	0.010833	Nutrients	Herbicides	Pathogens		Plant	Physiological Measures
Seagrass-epifauna relationships in a temperate South African estuary: Interplay between patch-size, within-patch location and algal fouling	Crisp, Franken, Kaellen, Lawrence, Muller, Pillay, Stroh	2012	2022-12-06	Hannah Lyford	Field	Survey		Management	capensis		Heuningnes Estuary in DeMond Nature Reserve, South Africa	34°43′S; 20°07′E	-34.7167	20.1167	Habitat Fragmentation	Epiphytes	Light		Plant & Community	Physiological Measures	Shoot Density			Distribution	Organismal Diversity	Macroalgae	Epiphytes
Seagrasses are negatively affected by organic matter loading and Arenicola marina activity in a laboratory experiment	Govers et al. 2014	2014	2021-06-16	Devin Ferguson	Mesocosm	Manipulative			noltii		mudflats of the Oosterschelde area, Netherlands	51°39'N 04°01'E	51.65	4.01667	Nutrients	Sediment			Plant, Community, & Environment	Growth
Seagrasses in tropical Australia, productive and abundant for decades decimated overnight	Pollard and Greenway	2013	2022-10-21	Sarah Joy Bittick	Field	Survey	Mesocosm		mulleri		Cairns Harbor, Australia	16° 53′ 41.22′′ S, 145° 47′ 14.05′′ E	-16.8948	145.787	Hydrodynamics	Light			Plant & Community	Physiological Measures				Seagrass competition	Distribution
SeagrassNet monitoring across the Americas: case studies of seagrass decline	Short et al., 2006	2006	2022-10-22	Hannah Lyford	Field	Survey			marina		Fishing Island, Portsmouth Harbor, NH, USA	43.0718° N, 70.7626° W	43.0718	-70.7626	Temperature	Herbivory	Nutrients	Pathogens	Plant, Community, & Environment	Shoot Density	Shoot Survival	Growth		Distribution	Organismal Diversity			Water Column Temperature	Water Column Turbidity	Water Column Salinity				Tizzard Island, Maryland, USA	38.0762° N, 75.3344° W	38.0762	-75.3344
Seagrass-Sediment Feedback: An Exploration Using a Non-recursive Structural Equation Model	Folmer, van der Geest, Jansen, Olff, Anderson, Piersma, & van Gils	2012	2022-12-17	Hannah Lyford			Model		noltii		Banc d’Arguin, Mauritania	19º60′N 16º33′W	20	-16.55	Hydrodynamics	Sediment	Nutrients	Oxygen	Plant, Community, & Environment	Physiological Measures	Shoot Density	Shoot Survival		Distribution				Sediment Characteristics	Water Column Temperature	Water Column Turbidity	Sediment Nutrients
Seasonal acclimation in metabolism reduces light requirements of eelgrass (Zostera marina)	Staehr and Borum	2011	2022-10-13	Sarah Joy Bittick	Mesocosm	Manipulative			marina		Roskilde Fjord, Denmark (N 55°48, E 12°03′)		55.8	12.05	Temperature	Light			Plant & Environment	Photosynthetic Output	Physiological Measures							Water Column Nutrients	Water Column Temperature	Water Column Turbidity
Seasonal acclimatization of eelgrass zostera-marina growth to light	Birgit Olesen & Kaj Sand-Jensen 1993	1993	2021-06-10	Sadie Kenny	Mesocosm	Manipulative			marina		Aarhus Bight, Denmark	56° 09' 16" N, 10° 19' 28" E	56.1544	10.3244	Light	Temperature			Plant	Growth	Physiological Meaures
Seasonal and interannual change in a Chesapeake Bay eelgrass community: Insights into biotic and abiotic control of community structure	Douglass et al.	2010	2022-12-02	Sarah Joy Bittick	Field	Survey			marina		Chesapeake Bay	York River in Chesapeake Bay (Virginia, 37u139N, 76u239W).	37.2167	-76.3833	Temperature	Salinity	Nutrients	Herbivory	Plant, Community, & Environment	Growth				Organismal Diversity	Chlorophyll A	Distribution	Epiphytes	Water Column Temperature	Water Column Salinity	Water Column Dissolved Oxygen	Water Column pH	predation
Seasonal and latitudinal variation in seagrass mechanical traits across Europe: the influence of local nutrient status and morphometric plasticity	L. M. Soisssons	2017	2022-12-10	Mehana Muranaka	Field	Survey			noltii		caldiz spain		36.5586	-6.28158	Light	Temperature			Plant	Physiological Measures	Growth													mondego estuary portugal		40.1934	-8.57751	santander spain		43.4417	-3.80477	biadosa estuary france		43.3649	-1.77805	archachon bay france		44.703	-1.10979
Seasonal and Year-to-Year Variations in the Growth of Zostera marina L. (Eelgrass) in the Lower Chesapeake Bay	Orth & Moore 1986	1986	2021-06-17	Devin Ferguson	Field	Survey			marina		Brown's Bay located in the Mobjack Bay in the lower Chesapeake Bay	37°17'N 76°23'W	37.2833	-76.3833	Temperature				Plant	Growth	Shoot Density													Guinea Marshes located at the mouth of the York River in lower Chesapeake Bay	37°16'N 76°22'W	37.2667	-76.3667
Seasonal biomass and nutrient dynamics of Zostera marina L. in two Mediterranean lagoons: Thau (France) and Venice (Italy)	Rigollet et al.	1998	2022-10-06	Sarah Joy Bittick	Field	Survey			marina		Thau Lagoon		43.3892	3.56214	Temperature	Nutrients	Salinity		Plant & Environment	Growth	Physiological Measures	Shoot Density	Reproductive Output					Water Column Nutrients	Sediment Nutrients	Water Column Temperature	Water Column pH			Venice lagoon		45.2389	12.2856
Seasonal Changes in Biomass and Shoot Characteristics of a Zostera capricorni Aschers. Dominant Meadow in Cairns Harbour, Northern Queensland	McKenzie	1994	2021-12-06	Devin Ferguson	Field	Survey			capricornii		seagrass meadow adjacent to Ellie Point, near Cairns, northern Queensland		-15.8833	145.767	Light	Temperature	Salinity		Plant, Community, & Environment	Growth	Shoot Density			Distribution				Sediment Characteristics
Seasonal changes in leaf growth rate of Zostera muelleri Irmisch ex Aschers. In South-Eastern Australia	Kerr & Strother, 1989	1989	2022-02-21	Hannah Lyford	Field	Survey			mulleri		Swan Bay, Victoria, Australia	38 ° 14' south, 144°40 ' east)	-38.2333	144.667	Light	Temperature	Epiphytes		Plant & Environment	Growth								Water Column Temperature	Water Column Turbidity
Seasonal changes in standing crop of Zostera muelleri in south-eastern Australia	Kerr & Strother, 1990	1990	2022-02-21	Hannah Lyford	Field	Survey			mulleri		Swan Bay, Victoria, Australia	38 ° 14' south, 144°40 ' east)	-38.2333	144.667	Light	Temperature	Hydrodynamics		Plant & Environment	Shoot Density								Water Column Temperature
Seasonal Changes in the Carbon and Nitrogen Contents of Zostera marina Populations in the Intertidal and Subtidal Zones of the Seomjin Estuary, Korea	KIm et al. 2021	2021	2021-06-24	Devin Ferguson	Field	Survey			marina		Seomjin Estuary, south coast of Korean peninsula	34°57'N 127°45'E	34.95	127.75	Nutrients				Plant	Physiological Measures	Growth
Seasonal changes of nutrients in water and sediment in a Mediterranean lagoon with shellfish farming activity (Than Lagoon, France)	Casabianca et al.	1997	2022-10-03	Sarah Joy Bittick	Field	Survey			noltii	marina	French Mediterranean lagoon of Thau		43.4279	3.61432	Aquaculture Impacts	Nutrients			Plant, Community, & Environment	Growth				Macroalgae	Chlorophyll A			Sediment Nutrients	Water Column Nutrients	Water Column Temperature	Water Column Dissolved Oxygen
Seasonal changes of the reproductive shoot of Zostera caulescens (Zosteraceae) in Sagami Bay, central Japan	Omori	1994	2022-11-30	Sarah Joy Bittick	Field	Survey			caulescens		Sagami Bay, Japan		35.2253	139.6	Temperature				Plant & Environment	Growth	Reproductive Output							Water Column Temperature
Seasonal cycle of growth and reproduction in the seagrass Zostera japonica in Hong Kong	Lee et al.	1997	2022-10-03	Sarah Joy Bittick	Field	Survey			japonica		Lai Chi Wo, Hong Kong		22.5277	114.263	Temperature				Plant & Environment	Growth	Reproductive Output							Water Column Salinity	Water Column Dissolved Oxygen	Water Column Temperature	Water Column Nutrients							San Tau		22.2879	113.925
Seasonal dynamics in mixed eelgrass beds, Zostera marina L. and Z-noltii Hornem., in a Mediterranean coastal lagoon (Thau lagoon, France)	Laugier, Rigollet, & Luce de Casabianca, 1998	1998	2022-05-30	Hannah Lyford	Field	Survey			marina	noltii	Thau Lagoon, South France	43.3980° N, 3.6116° E	43.398	3.6116	Light	Temperature	Hydrodynamics		Plant, Community, & Environment	Shoot Density	Growth	Shoot Survival		Macroalgae				Water Column Temperature	Water Column Turbidity	Water Column Nutrients	Sediment Characteristics
Seasonal dynamics of biomass and nutrient content in the intertidal seagrass Zostera noltii Hornem. from Palmones River estuary, Spain	Perez-Llorens & Niell, 1992	1992	2022-02-21	Hannah Lyford	Field	Survey			noltii		Palmones Estuary, Southern Spain	36” 11’ N, 5” 27’ W	36.1833	-5.45	Carbon	Nutrients			Plant	Physiological Measures	Growth
Seasonal dynamics of Zostera noltii Hornem. in two Mediterranean lagoons	Pergent-Martini et al.	2005	2022-10-05	Sarah Joy Bittick	Field	Survey			noltii		Biguglia lagoon (42370 N; 9270 E;		42.6167	9.45	Temperature	Salinity	Nutrients	Light	Plant & Environment	Shoot Density	Growth							Sediment Characteristics	Water Column Temperature	Water Column Salinity	Water Column Dissolved Oxygen			Urbino lagoon (42030 N; 9280 E		42.05	9.46667
Seasonal effects of clams (Panopea generosa) on eelgrass (Zostera marina) density but not recovery dynamics at an intertidal site	Jennifer L. Ruesink & Kirsten Rowell 2012	2012	2022-05-19	Sadie Kenny	Field	Manipulative			marina		Puget Sound, Washington, USA		47.3666	-122.815	Aquaculture Impacts				Plant & Community	Shoot Density	Growth	Physiological Meaures						Sediment Nutrients	Sediment Characteristics	Water Column Nutrients
Seasonal Growth and Senescence of a Zostera marina Seagrass Meadow Alters Wave-Dominated Flow and Sediment Suspension Within a Coastal Bay	Hansen & Reidenbach	2013	2022-12-07	Hannah Lyford	Field	Survey					South Bay, Virginia, USA	37.223628 N, -75.873770 W	37.2236	-75.8738	Sediment	Hydrodynamics			Plant, Community, & Environment	Shoot Density	Physiological Measures			Distribution				Sediment Characteristics	Water Column Turbidity
Seasonal growth dynamics of the seagrass Zostera caulescens on the eastern coast of Korea	Kim et al.	2014	2022-10-04	Sarah Joy Bittick	Field	Survey			caulescens		(37°03'N, 129°25'E), Uljin, on the eastern coast of Korea		37.05	129.417	Temperature	Nutrients	Light		Plant & Environment	Shoot Density	Growth	Reproductive Output						Water Column Temperature	Water Column Nutrients	Sediment Nutrients
Seasonal growth of benthic marine plants as related to environmental factors in an estuary	Conover, 1958	1958	2021-11-09	Hannah Lyford	Field	Survey			marina		Great Pond, Falmouth, MA	41.5610° N, 70.5815° W	41.561	-70.5815	Light	Temperature	Nutrients		Plant, Community, & Environment	Growth				Distribution				Water Column Nutrients	Water Column pH
Seasonal Growth Responses of the Seagrass Zostera marina under Severely Diminished Light Conditions	Young Kyun Kim et al. 2015	2015	2021-06-08	Sadie Kenny	Field	Manipulative			marina		Koje Bay, southern coast of Korea	34° 48' N, 128° 35' E	34.8	128.583	Light				Plant & Environment	Shoot Density	Growth							Water Column Temperature	Sediment Nutrients
Seasonal heterogenity in the photophysiological response to air exposure in two tropical intertidal seagrass species	K. Petrou et al.	2013	2022-12-12	Mehana Muranaka	Field	Survey			capricornii		Pelican Banks, Gladstone harbour, australia		-23.7808	151.296	Light	Oxygen			Plant & Community	Physiological Measures	Photosynthetic Output			Seagrass competition
Seasonal pulses of turbidity and their relations to eelgrass (Zostera marina L) survival in an estuary	Moore, Wetzel, & Orth, 1996	1996	2022-05-30	Hannah Lyford	Field	Survey		Restoration	marina		York River Estuary, Chesapeake Bay, Virginia, USA	37° 14' 31.20" N, 76° 22' 34.19" W	37.242	-76.3762	Light	Temperature			Plant & Environment	Shoot Survival	Photosynthetic Output							Water Column Turbidity	Water Column Temperature
Seasonal Response and Recovery of Eelgrass (Zostera marina) to Short-Term Reductions in Light Availability	M Wong et. al 2020	2020	2022-10-28	Carolina Salcedo	Mesocosm	Manipulative			marina		Head of Port l'Herbert Bay on south end of Nova Scotia, Canada	38° 39' 56.0592" S	-38.6656	146.688	Light				Plant	Shoot Density	Growth	Photosynthetic Output
Seasonal sediment load, light attenuation and eelgrass coverage in San Diego Bay	Richter, Perdue, & Patterson, 1995	1995	2022-04-10	Hannah Lyford	Field	Survey			marina		San Diego Bay, California, USA	32.6717° N, 117.1441° W	32.6717	-117.144	Light	Sediment			Plant, Community, & Environment	Photosynthetic Output				Chlorophyll A	Distribution			Water Column Turbidity	Sediment Characteristics	Sediment Nutrients	Water Column Nutrients
Seasonal shifts in seagrass bed primary producers in a cold-temperate estuary: Dynamics of eelgrass Zostera marina and associated epiphytic algae	Hasegawa et al.	2007	2022-10-13	Sarah Joy Bittick	Field	Survey			marina		Akkeshi-ko estuary, Hokkaido, Japan Site A	(438020N, 1448520E)	43.065	144.872	Light	Nutrients			Plant & Community	Growth	Shoot Density	Physiological Measures		Epiphytes	Chlorophyll A	Organismal Diversity								Site B		43.0417	144.895	Site C		43.0333	144.882
Seasonal spectral variation of Zostera noltii and its influence on pigment-based Vegetation Indices	Bargain et al. 2013	2013	2021-06-14	James Roe	Field	Survey			noltii		Bourgneuf Bay, situated south of the Loire estuary on the French Atlantic coast	2°10′W, 46°57′N	46.95	-2.16667	Temperature	Light			Plant	Physiological Measures	Growth
Seasonal Variability of the Carbon and Nitrogen Isotopic Signature in a Zostera noltei Meadow at the NW Iberian Peninsula	Marta Román et al. 2018	2018	2022-11-14	Sadie Kenny	Field	Survey			noltii		Ría de Vigo (NW Iberian Peninsula)	42° 7’ N, 8° 49’ W	42.1167	-8.80833	Anthropogenic Use	Light	Temperature		Plant, Community, & Environment	Growth	Physiological Measures			Epiphytes				Sediment Nutrients
Seasonal Variation Characteristics of Zostera marina L. in HAENAM SAGUMI on the Southern Coast of Korea	Ok et al.	2013	2022-12-03	Sarah Joy Bittick	Field	Survey			marina		HAENAM SAGUMI	34􀆆19′11′′N, 126􀆆34′21′′E)	34.3197	126.573	Light	Temperature			Plant & Environment	Growth	Shoot Density	Reproductive Output						Water Column Temperature	Water Column Turbidity
Seasonal variation in growth and biomass of an intertidal Zostera noltii stand in the Dutch Wadden Sea	Philippart 1995	1995	2022-04-23	Devin Ferguson	Field	Survey			noltii		tidal flat off of Terschelling, Dutch Wadden Sea, Netherlands		52.3971	5.38749	Light				Plant & Community	Growth	Shoot Density			Chlorophyll A	Macroalgae	Invertebrates
Seasonal Variation in Growth, Morphology, and Reproduction of Eelgrass Zostera marina on the Eastern Coast of the Shandong Peninsula, China	Pei D Zhang et al. 2016	2016	2022-06-13	Sadie Kenny	Field	Survey			marina		Swan Lake of Shandong Peninsula, China	37.33828–37.35888 N, 122.55518–122.57938 E	37.35	122.57	Temperature	Light			Plant	Growth	Shoot Density	Reproductive Output
Seasonal variation in leaf age structure of the Eelgrass Zostera marina on the eastern coast of the Shandong Peninsula, China	Chao Fang et al. 2018	2018	2022-10-23	Sadie Kenny	Field	Survey			marina		Swan Lake, eastern coast of Shandong Peninsula, China		37.35	122.567	Light	Temperature			Plant	Growth	Shoot Density
Seasonal variation in rates of hetertrophic nitrogen fixation (acetylene reduction) in Zostera notlii meadows and uncolonised sediments of the Bassin d'Arachon, south-west France	Welsh et al.	1996	2022-09-26	Sarah Joy Bittick	Mesocosm	Manipulative			noltii		Bassin d'Arcachon Station A		44.6708	-1.18944	Habitat Fragmentation	Nutrients			Community & Environment					Microbial Diversity				Sediment Characteristics	Sediment Nutrients
Seasonal variation in sedimentary amino acids and the association of organic matter with mineral surfaces in a sandy eelgrass meadow	Van Mooy and Keil	2002	2022-10-05	Sarah Joy Bittick	Field	Survey			marina		Padilla Bay	(from 48° 34.39’ N, 122° 32.36’ W to 48° 34.11’ N, 122° 31.79’ W)	48.5732	-122.539	Sediment				Plant, Community, & Environment	Physiological Measures				Microbial Diversity				Sediment Characteristics	Sediment Nutrients
Seasonal variation in short-term survival of Zostera noltii transplants in a declining meadow in Portugal	Martins et al.	2005	2022-09-26	Sarah Joy Bittick	Field	Manipulative			noltii		Mondego River (Portugal)	408080N, 88500W	40.1333	-8.83333	Salinity	Light	Temperature	Nutrients	Plant, Community, & Environment	Growth	Shoot Survival							Water Column Nutrients	Water Column Temperature	Water Column Salinity
SEASONAL VARIATION IN STANDING CROP, DENSITY AND LEAF GROWTH RATE OF THE SEAGRASS, HETEROZOSTERA TASMANICA, IN WESTERN PORT AND PORT PHILLIP BAY, VICTORIA, AUSTRALIA	Bulthuis 1983	1983	2021-06-07	James Roe	Field	Survey			tasmanica		Charing Cross, Victoria Australia	38° 15'30" S, 145° 21' 55" E.	-38.2583	145.365	Temperature	Light			Plant & Environment	Growth	Shoot Density							Water Column Salinity	Water Column Nutrients	Sediment Characteristics				San Remo, Victoria Australia	38° 13' 30" S, 145° 23' 50" E.	-38.225	145.397	Spit Point in Western Port and Port Philips Bay, Victoria Australia	38° 21' 15" S, 145° 31' 15" E.	-38.3542	145.521	Edwards Point in Western Port and Port Philips Bay, Victoria Australia	38° 13' 20" S, 144° 41' 45" E.	-38.2222	144.696
Seasonal Variation in the Biomass of Eelgrass (Zostera marina) and Epiphytic Algae in Two Eelgrass Beeds around Namhae Island in Korea	Kwak & Huh 2009	2009	2022-01-21	Devin Ferguson	Field	Survey			marina		Dongdae Bay, Namhae Island, Korea		34.8822	128.018	Temperature	Sediment			Plant & Community	Shoot Density	Growth			Epiphytes										Aenggang Bay, Namhae Island, Korea		34.7721	127.936
Seasonal variation in the intertidal seagrass Zostera noltii Hornem: Coupling demographic and physiological patterns	Vermaat & Verhagen, 195	1996	2022-05-30	Hannah Lyford	Field	Survey			noltii		Zandkreek Estuary, SW Netherlands	51.5450° N, 3.8100° E	51.545	3.81	Light	Temperature	Herbivory		Plant, Community, & Environment	Shoot Density	Shoot Survival	Reproductive Output	Photosynthetic Output	Distribution	Chlorophyll A			Water Column Temperature	Water Column Turbidity	Water Column Nutrients		Physiological Measures (R)
Seasonal variations in nitrogen-fixation (acetylene reduction) and sulphate-reduction rates in the rhizospehere of Zostera noltii: nitrogen fixation by sulphate-reducing bacteria	S. Bourguès et al. 1996	1996	2022-05-19	Emma Guerrini Romano	Mesocosm	Manipulative			noltii		Bassin d'Archachon in French Atlantic Coast	44°42'07.1"N 1°10'08.9"W	44.702	-1.16667	Nutrients	Light			Environment									Sediment Nutrients
Seasonal variations in photosynthetic irradiance response curves of macrophytes from a Mediterranean coastal lagoon	Plus et al.	2005	2022-10-04	Sarah Joy Bittick	Field	Survey			marina	noltii	Thau Lagoon (Mediterranean Sea,	438240N and 38320E)	43.4	3.53333	Light	Temperature			Plant	Photosynthetic Output	Physiological Measures
Seasonal variations of community production, respiration and biomass of different primary producers in an intertidal Zostera noltii bed (Western English Channel, France)	Ouisse et al. 2010	2010	2022-02-16	Devin Ferguson	Field	Survey			noltii		Bay of Morlaix, France		48.6956	-3.96088	Carbon	Temperature			Plant, Community, & Environment	Growth	Physiological Measures			Epiphytes	Chlorophyll A			Sediment Nutrients
Seasonal modification of tidal flat sediment dynamics by seagrass meadows ofZostera noltii (Bassin d'Arcachon, France)	F. Ganthy et al. 2011	2011	2021-06-21	Sadie Kenny	Field	Survey			noltii		Arcachon Lagoon, Southwest France	44° 41' 42" N, 1° 07' 15" W	44.695	-1.12083	Hydrodynamics				Plant, Community, & Environment	Shoot Density	Growth			Distribution				Sediment Characteristics
Seasonal variations in carbon and nitrogen constituents in eelgrass (Zostera marina L.) asinfluenced by increased temperature and water-column nitrate	BW Touchette & JM Burkholder 2002	2002	2022-05-16	Sadie Kenny	Mesocosm	Manipulative			marina		Middle Marsh, Beaufort, North Carolina, USA		34.6833	-76.6	Temperature	Nutrients			Plant	Physiological Meaures
Seasonal variations in eelgrass (Zostera marina L.) responses to nutrient enrichmentand reduced light availability in experimental ecosystems	Kenneth A. Moore & Richard L. Wetzel 1999	1999	2021-06-15	Sadie Kenny	Mesocosm	Manipulative			marina		Mouth of York River Estuary, Chesapeake Bay	37° 16' 44" N, 76° 20' 44" W	37.2789	-76.3456	Nutrients	Light			Plant & Community	Growth	Physiological Meaures			Epiphytes
Seasonality in vegetation biometrics and its effects on sediment characteristics and meiofauna in Baltic seagrass meadows	Jankowska et al.	2014	2022-09-27	Sarah Joy Bittick	Field	Survey			marina		Puck Bay, Ryf Mew sandbar		54.723	18.5749	Temperature	Light			Plant, Community, & Environment	Physiological Measures	Photosynthetic Output	Shoot Density	Growth	Chlorophyll A	Invertebrates	Organismal Diversity	Macroalgae	Sediment Characteristics
Seasonality of eelgrass biomass across gradients in temperature and latitude	Kevin Kuhlmann Clausen et al.	2014	2022-11-02	Mehana Muranaka	Field	Survey			marina		Japan, odawa bay		35.1386	139.658	Temperature				Plant	Growth	Shoot Density													denmark		54.9869	11.8805	Maine USA, cobscook bay		44.9088	-67.0719	mexico, baja california		27.7498	-114.252	spain, cala jonquet		42.3672	3.46811
Seasonality of eelgrass, epiphyte, and grazer biomass and productivity in subtidal eelgrass meadows subjected to moderate tidal amplitude	Nelson & Waaland, 1996	1996	2022-05-30	Hannah Lyford	Field	Survey			marina		San Juan Archipelago, Washington, USA (Brown Island, Friday Harbor)	48°32'11" N, 122°59'27" W	48.5364	-122.991	Light	Temperature	Nutrients		Plant, Community, & Environment	Growth	Photosynthetic Output			Epiphytes	Invertebrates			Water Column Turbidity	Water Column Nutrients	Water Column Temperature
Seaweed/Seagrass community and its habitat characteristics from a landlocked brackish-water lagoon in Kamikoshiki-jima Island, Kagoshima Prefecture, Japan	Shimabukuro et al.	2012	2022-12-06	Sarah Joy Bittick	Field	Survey			japonica		Namakoike and Kaiike Lake	,	31.8697	129.871	Temperature	Salinity	Oxygen	Nutrients	Community & Environment					Distribution	Macroalgae	Invertebrates	Organismal Diversity	Water Column Temperature	Water Column Salinity	Water Column Dissolved Oxygen	Water Column Nutrients
Secondary Production of Kelp Bass Paralabrax clathratus in Relation to Coastal Eelgrass Zostera marina Habitat in a Southern California Marine Protected Area	Tanner et al.	2019	2023-02-06	Sarah Joy Bittick	Field	Survey			marina		Big Fisherman’s Cove (33°26 38.85N, 118°29 6.86W) in the Blue Cavern State Marine Conservation Area (SMCA) on Santa Catalina Island		33.3775	-118.485	Light	Temperature			Plant & Community	Shoot Density	Growth			Distribution	Organismal Diversity
Sediment Accumulation Rates and Submersed Aquatic Vegetation (SAV) Distributions in the Mesohaline Chesapeake Bay, USA	Palinkas & Koch	2012	2022-12-08	Hannah Lyford	Field	Survey			marina		Trippe, Chesapeake Bay, VA, USA	37° 14' 31.20" N, 76° 22' 34.19" W	37.242	-76.3762	Light	Sediment	Hydrodynamics		Community & Environment					Distribution				Sediment Nutrients	Sediment Characteristics	Water Column Turbidity	Water Column Nutrients			Crab Alley Bay, Maryland, USA	38.9358° N, 76.2889° W	38.9358	-76.2889	Casson Point, Maryland, USA	38.538023, -76.243895	38.538	-76.2439	Herring Bay, VA, USA	38.750062, -76.536633	38.7501	-76.5366
Sediment ammonium availability and eelgrass (Zostera marina) growth	Dennison et al. 1987	1987	2021-06-04	Devin Ferguson	Mesocosm	Manipulative			marina		eelgrass meadow in Great Harbor, Woods Hole, Massachusetts	40°31.5'N 70°40.5'W	40.525	-70.675	Sediment				Plant & Environment	Growth	Photosynthetic Output	Physiological Measures						Sediment Characteristics	Sediment Nutrients
Sediment anoxia limits microbial-driven seagrass carbon remineralization under warming conditions	Trevathan-Tackett et al.	2017	2022-10-05	Sarah Joy Bittick	Mesocosm	Manipulative			mulleri		Fagans Bay (33.4306 S, 151.3210 E)		-33.4306	151.321	Temperature	Nutrients	Oxygen		Plant, Community, & Environment	Growth	Physiological Measures			Microbial Diversity				Sediment Characteristics
Sediment carbon sink in low-density temperate eelgrass meadows (Baltic Sea)	Jankowska, Michel, Zaborska, & Wlodarska-Kowalczuk	2016	2022-12-27	Hannah Lyford	Field	Survey			marina		Gdańsk-Sopot, Baltic Sea, Poland	54.407242 N, 18.672401 E	54.4072	18.6724	Carbon	Sediment	Nutrients	Habitat Fragmentation	Plant, Community, & Environment	Physiological Measures	Photosynthetic Output	Shoot Density		Distribution	Organismal Diversity	Chlorophyll A		Sediment Characteristics	Sediment Nutrients	Water Column Dissolved Oxygen	Water Column Salinity			Outer Puck Bay, Baltic Sea, Poland	54.575870 N, 18.695931 E	54.5759	18.6959	Inner Puck Bay, Baltic Sea, Poland	54.754413 N, 18.442556 E	54.7544	18.4426
Sediment modification by seagrass beds: Muddification and sandification induced by plant cover and environmental conditions	Bos, Hermus, Suykerbuyk, Katwijk	2010	2022-12-02	Hannnah Lyford	Field	Manipulative		Restoration	marina		Oosterschelde, Zandkreek, Netherlands	51.5450° N, 3.8100° E	51.545	3.81	Sediment	Nutrients	Hydrodynamics		Plant, Community, & Environment	Shoot Survival	Physiological Measures	Shoot Density		Distribution				Sediment Characteristics	Sediment Nutrients	Water Column Turbidity	Water Column Nutrients			Oosterschelde, Roggenplaat, Netherlands	51.6639° N, 3.7914° E	51.6639	3.7914	Terschelling, Netherlands	53.3979° N, 5.3467° E	53.3979	5.3467	Em's Estuary, Germany	53.3675 N, 7.2078 E	53.3675	7.2078	Balgzand mud
Sediment pool and plant content as indicators of nitrogen regimes in Portuguese estuaries	Castro, Valiela, Freitas	2009	2022-11-30	Hannnah Lyford	Field	Survey			noltii		Mondego Estuary, Portugal	40°07'N 08°49'W	40.1167	-8.81667	Anthropogenic Use	Nutrients	Sediment		Plant, Community, & Environment	Physiological Measures	Shoot Density			Distribution	Organismal Diversity			Sediment Characteristics	Sediment Nutrients	Water Column Turbidity	Water Column Nutrients			Mira Estuary, Portugal	40.428798 N and -8.738126 W	40.4288	-8.73813
Sediment Resuspension and Deposition on Seagrass Leaves Impedes Internal Plant Aeration and Promotes Phytotoxic H2S Intrusion	Broderson, Hammer, Schrameyer, Floytrup, Rasheed, Ralph, Kuhl, & Pederson	2017	2022-12-27	Hannah Lyford	Mesocosm	Manipulative			mulleri	capricorni	Narrabeen Lagoon, NSW, Australia	33.712903 S, 151.285279 E	-33.7129	151.285	Anthropogenic Use	Oxygen	Sediment	Light	Plant & Environment	Physiological Measures	Photosynthetic Output							Water Column Dissolved Oxygen	Sediment Nutrients	Sediment Characteristics	Water Column Turbidity
Sediment Stocks of Carbon, Nitrogen, and Phosphorus in Danish Eelgrass Meadows	Kindeberg et al.	2018	2022-12-05	Sarah Joy Bittick	Field	Survey			marina		Danish Coast		8.25433	56.603	Nutrients	Carbon	Sediment		Community & Environment					Chlorophyll A				Sediment Characteristics	Water Column Nutrients	Water Column Salinity	Water Column Turbidity
Sediment sulfur dynamics related to biomass- density patterns in Zostera marina (eelgrass)beds	Holmer and Nielsen 1997	1997	2021-06-15	James Roe	Field	Survey			marina		0lsted Strand, Roskilde Fjord, Denmark	55°46'59.0"N 12°04'30.7"E	55.7831	12.0752	Seagrass competition				Environment										Sediment Characteristics	Sediment Nutrients
Seed germination responses to some environmental factors in the seagrass Zostera capricorni from eastern Australia	Jennie L. Brenchley & Robin J. Probert 1998	1998	2022-05-26	Sadie Kenny	Mesocosm	Manipulative			capricornii		Moreton Bay, southern Qld., Australia	27º25'S, 153º20'E	-27.4167	153.333	Temperature	Salinity	Oxygen		Plant	Growth
Seed Predation by the Shore Crab Carcinus maenas: A Positive Feedback Preventing Eelgrass Recovery?	Infantes et al.	2016	2022-10-13	Sarah Joy Bittick	Field	Manipulative			marina		Gullmars fjord, Gåso		58.2339	11.4022	Invertebrates	Herbivory			Plant & Community	Shoot Survival	Reproductive Output			Invertebrates								predation		Bo¨kevik bay, near Kristineberg		58.2481	11.4462
Seed size and burial depth influence Zostera marina L. (eelgrass) seed survival, seedling emergence and initial seedling biomass development	Jorgensen et al.	2019	2023-01-16	Sarah Joy Bittick	Mesocosm	Manipulative			marina		Limfjorden Denmark		57.03	9.41	Sediment				Plant & Environment	Shoot Survival	Reproductive Output	Growth						Sediment Characteristics	Water Column Temperature
SEED-BANK DEVELOPMENT, GERMINATION AND EARLY SEEDLING SURVIVAL OF 2 SEAGRASS SPECIES FROM THE NETHERLANDS - ZOSTERA-MARINA L AND ZOSTERA-NOLTII HORNEM	Hootsmans, Vermaat & Van Vierssen, 1987	1987	2021-10-21	Hannah Lyford	Mesocosm	Manipulative			marina	noltii	Zandkreek, Netherlands	51.5450° N, 3.8100° E	51.545	3.81	Temperature	Salinity			Plant	Shoot Survival	Reproductive Output
Seed-germination and seedling growth of zostera-marina l (eelgrass) in the chesapeake bay	Robert J.Orth & Kenneth A. Moore 1983	1983	2021-06-17	Sadie Kenny	Field	Survey			marina		York River, Chesapeake Bay and Mobjack Bay (Browns Bay) and Vaucluse Shores	37° 27' 11" N, 76° 30' 12" W	37.4531	-76.5033	Temperature	Salinity			Plant	Growth	Shoot Density
Seedling establishment in eelgrass: seed burial effects on winter losses of developing seedlings	Marion, Orth	2012	2022-12-05	Hannnah Lyford	Field	Manipulative		Restoration	marina		Piankatank River, Chesapeake Bay, VA, USA	37.503° N, 76.329° W	37.503	-76.329	Sediment	Herbivory			Plant, Community, & Environment	Physiological Measures	Shoot Survival	Growth	Shoot Density	Distribution	Invertebrates			Sediment Characteristics						Mumfort Island in the York River, Chesapeake Bay, VA, USA	37.268° N, 76.515° W	37.268	-76.515	Spider Crab Bay, Chesapeake Bay, VA, USA	37.358° N, 75.800° W	37.358	-75.8
Sensitivity of Ruppia maritima and Zostera marina to sulfide exposure around roots	Østergaard Pedersen & Kristensen	2015	2022-12-12	Hannah Lyford	Field	Manipulative			marina		Odense Fjord, Denmark	55°28′43.1″N 10°36′38.0″E	55.4786	10.6106	Toxins				Plant	Physiological Measures	Growth	Shoot Survival	Shoot Density
Severe shifts of Zostera marina epifauna: Comparative study between 1997 and 2018 on the Swedish Skagerrak coast	Reira et al. 2020	2020	2021-10-21	Hannah Lyford	Field	Survey			marina		Swedish Skagerrak coast	58.024182 N, 11.502830 E	58.1914	9.69441	Epiphytes	Nutrients			Plant & Community	Growth				Organismal Diversity	Invertebrates	Epiphytes	Distribution
Sexual reproduction and seed dispersal pattern of annual and perennial Zostera marina in a heterogeneous habitat	LZ Qin et. al 2014	2014	2022-10-27	Carolina Salcedo	Mesocosm	Manipulative			marina		Moon Lake, Shandong, China	37° 21' N 122° 31' 60" E	37.35	122.533	Light	Temperature	Salinity		Plant	Photosynthetic Output	Shoot Density
Sexual reproduction vs. clonal propagation in the recovery of a seagrass meadow after an extreme weather event	Paulo et al.	2019	2023-02-05	Sarah Joy Bittick	Field	Survey			marina		Sado estuary, Portugal (38°29.525’N 08°54.507’W,		38.4921	-8.90845	Hydrodynamics	Habitat Fragmentation			Plant	Reproductive Output	Physiological Measures	Shoot Density	Growth
Shallow dredging as a strategy for the control of sublittoral macrophytes: a case study in Tuggerah Lakes, New South Whales	L. C. Collett et al. 1981	1981	2022-08-29	Emma Guerrini Romano	Field	Manipulative			capricornii		Tuggerah Lakes, South Whales		-33.2667	151.483	Anthropogenic Use	Light			Plant, Community, & Environment	Growth				Organismal Diversity	Distribution			Sediment Characteristics	Sediment Nutrients	Water Column Salinity	Water Column Temperature
Shared genomic outliers across two divergent populations clusters of a highly threatened seagrass	Nikki Leanne Phair et al.	2019	2023-01-19	Mehana Muranaka	Field	Survey			capensis		olifants		-31.7021	18.1876	Genomics	Temperature	Drought		Plant & Community	Physiological Measures				Distribution										berg		-32.7697	18.1438	geelbek, langebaan		-33.1941	18.1211	oosewaal, langebaan		-33.1214	18.0447	breede		-34.4074	20.8453
Shift in seagrass food web structure over decades is linked to overfishing	Susanne Baden et al.	2012	2022-11-10	Mehana Muranaka	Field	Survey			marina		Gullmars fjord on sweedish northwest coast		58.2333	11.4027	Anthropogenic Use				Community					Invertebrates										Öresund region southern sweden		55.8833	12.7125
Shoot morphometry and production dynamics of eelgrass in the northern Baltic Sea	Boström et al. 2004	2004	2021-06-02	Devin Ferguson	Field	Survey			marina		Åland Islands, northern Baltic Sea	61°N 20°E	61	20	Nutrients	Light			Plant & Environment	Shoot Density	Growth							Water Column Temperature	Water Column Nutrients	Water Column Turbidity	Sediment Nutrients
Short-term phosphate uptake kinetics in Zostera noltii Hornem: a comparison between excised leaves and sediment-rooted plants	Pérez-Lloréns & Niell 1995	1995	2022-04-23	Devin Ferguson	Mesocosm	Manipulative			noltii		Algeciras Bay, Southern Spain		36.1833	-5.45	Nutrients				Plant	Physiological Measures
Short-Term Temperature Stress Results in Seagrass Community Shift in a Temperate Estuary	Erin C. Shields et al. 2019	2019	2022-12-01	Sadie Kenny	Field	Survey			marina		York River, Chesapeake Bay, VA	37° 13′ 1′′ N, 76° 23′ 19′′ W	37.2169	-76.3886	Temperature				Plant, Community, & Environment	Growth				Distribution
Significance of salinity and silicon levels for growth of a formerly estuarine eelgrass (Zostera marina) population (Lake Grevelingen, The Netherlands)	Kamermans et al. 1999	1999	2021-06-24	James Roe	Mesocosm	Manipulative			marina		Lake Grevelingen, The Netherlands	51°45'18.8"N 3°54'36.0"E	51.7552	3.91	Toxins	Salinity			Plant	Shoot Density	Growth	Physiological Measures
Simultaneous analysis of delta C-13, delta N-15 and delta S-34 ratios uncovers food web relationships and the trophic importance of epiphytes in an eelgrass Zostera marina community	Mittermayr, Hansen, & Sommer	2014	2022-12-29	Hannah Lyford	Field	Survey			marina		Kiel Fjord, Germany	54° 21’ N, 10° 9’ E	54.35	10.15	Epiphytes	Carbon	Herbivory		Plant, Community, & Environment	Growth	Physiological Measures			Organismal Diversity	Epiphytes	Invertebrates	Distribution	Water Column Nutrients	Water Column Salinity
Site characterisation of the south west European marine sites, Chesil and the Fleet cSAC, SPA	Langston et al.	2003	2022-11-28	Sarah Joy Bittick	Field	Survey	Technical Report		marina	noltii	Yealm estuary, Plymouth		50.313	-4.07308	Herbicides	Toxins	Nutrients	Sediment	Plant, Community, & Environment	Photosynthetic Output	Shoot Density			Distribution	Organismal Diversity	Invertebrates	Macroalgae	Water Column Nutrients	Water Column Dissolved Oxygen	Water Column Turbidity	Sediment Characteristics	metals
Site specific differences in morphometry and photophysiology in intertidal Zostera muelleri meadows	Kohlmeier, Pilditch, Bornman, & Bischof	2014	2022-12-17	Hannah Lyford	Field	Survey			mulleri		Tauranga Harbour, North Island, New Zealand	-37.566738, 176.041408	-37.5667	176.041	Temperature	Light	Sediment	Nutrients	Plant, Community, & Environment	Photosynthetic Output	Physiological Measures	Shoot Density	Growth	Organismal Diversity	Distribution			Water Column Turbidity	Sediment Characteristics	Water Column Nutrients	Water Column Temperature
Small-scale heterogeneity in the geochemistry of seagrass vegetated and non-vegetated estuarine sediments: causes and consequences	Herbert, Morse, & Eldridge	2005	2022-11-30	Hannnah Lyford	Field	Survey			marina		Idaho Point, Newport, OR, USA	44°37.125′ N, 124°01.847′ W	44.6187	-124.031	Sediment	Nutrients			Plant, Community, & Environment	Physiological Measures	Shoot Density			Distribution	Microbial Diversity			Sediment Characteristics	Sediment Nutrients
SMRT sequencing of full-length transcriptome of seagrasses Zostera japonica	Chen, Qiu, & Yang	2019	2023-01-18	Hannah Lyford	Mesocosm	Manipulative			japonica		Pearl bay, China	21°37′14.45′′N, 108°20′50.00′′E	21.6207	108.347	Temperature	Genomics			Plant	Physiological Measures	Shoot Survival
Sodium-dependent nitrate transport at the plasma membrane of leaf cells of the marine higher plant Zostera marina L.		2000	2022-10-13	Sarah Joy Bittick	Mesocosm	Manipulative			marina		Malaga, Spain		36.7157	-4.40738	Salinity	Nutrients			Plant	Physiological Measures
Soft-bottom macrophytobenthos and associated environmental factors in Thau Lagoon (France, Mediterranean).	Gerbal and Verlaque	1995	2022-11-30	Sarah Joy Bittick	Field	Survey			marina	noltii	Thau lagoon, France		43.4293	3.64036	Hydrodynamics	Nutrients	Aquaculture Impacts		Plant, Community, & Environment	Growth				Macroalgae	Distribution			Water Column Salinity	Water Column Nutrients	Water Column Temperature	Water Column Dissolved Oxygen
Sources of uncertainty in estimation of eelgrass depth limits	Balsby, Carstensen, & Krause-Jensen	2013	2022-12-07	Hannah Lyford			Model		marina		Kattegat-Belt area of the Baltic Sea, Denmark	56°30′N 11°30′E﻿	56.5	11.5	Light				Plant & Community	Growth	Physiological Measures			Distribution
Spatial and interannual variations with depth in eelgrass populations	Middelboe, Sand-Jensen, and Krause-Jensen, 2003	2003	2022-10-12	Hannah Lyford	Field	Survey			marina		Oresund, Malmo, Sweden	55.7669° N, 12.7311° E	55.7669	12.7311	Light				Plant, Community, & Environment	Shoot Density	Growth			Distribution				Water Column Turbidity
Spatial and temporal changes in non-structural carbohydrate reserves in eelgrass (Zostera marina L. in Danish coastal waters	Tritep Vichkovitten, Marianne Holmer, Morten S. Frederiksen	2007	2022-10-29	Mehana Muranaka	Field	Survey			marina		Sjælland Denmark, Roskilde Fjord: Skulddelev and Ellinge		55.8714	55.8714	Nutrients	Light			Plant	Physiological Measures														Sjælland Denmark, Roskilde Fjord: Rungsted in Øresund		55.9842	12.5799
Spatial and temporal variability of benthic biogeochemical fluxes associated with macrophytic and macrofaunal distributions in the Thau lagoon (France)	Amice et al., 2007	2007	2022-11-14	Hannah Lyford	Field	Survey			marina	noltii	Thau Lagoon, France	43.3980° N, 3.6116° E	43.398	3.6116	Nutrients	Aquaculture Impacts	Sediment		Plant, Community, & Environment	Physiological Measures	Shoot Density			Distribution	Organismal Diversity	Macroalgae		Water Column Nutrients	Sediment Nutrients	Water Column Turbidity	Water Column Salinity
Spatial and temporal variation in C:N:P ratios, delta N-15 and delta C-13 of eelgrass Zostera marina as indicators of ecosystem processes, Tomales Bay, California, USA	James W. Fourqurean et al. 1997	1997	2022-09-22	Sadie Kenny	Field	Survey			marina		Tomales Bay, California, USA		38.1667	-122.9	Temperature				Plant	Physiological Meaures
Spatial and temporal variations of aquatic macrophytes and water quality in six coastal lagoons of western Greece	Christia & Papastergiadou	2007	2022-11-23	Hannah Lyford	Field	Survey			noltii		Amvrakikos gulf, Greece	38.9561° N, 21.0222° E	38.9561	21.0222	Light	Temperature	Salinity		Plant, Community, & Environment	Shoot Density				Distribution	Seagrass competition	Organismal Diversity	Macroalgae	Water Column Salinity	Water Column Dissolved Oxygen	Water Column Temperature	Water Column Turbidity
Spatial distribution pattens and relationship between recent vegetation and diaspore bank of a brackish coastal lagoon on the southern Baltic Sea	T. Steinhardt et al. 2007	2007	2022-06-20	Emma Guerrini Romano	Field	Survey			marina	noltii	Wismar Bay, Baltic Sea, Germany		54.064	11.571	Nutrients	Hydrodynamics	Light		Plant, Community, & Environment	Reproductive Output	Growth			Distribution	Organismal Diversity			Sediment Nutrients
Spatial modeling of eelgrass distribution in Great Bay, New Hampshire.	Short et al.	2004	2022-11-29	Sarah Joy Bittick			Model	Technical Report	marina		The Great Bay Estuary in New Hampshire		43.0848	-70.8647	Light	Nutrients	Hydrodynamics	Pathogens	Plant, Community, & Environment	Growth	Physiological Measures	Photosynthetic Output		Organismal Diversity	Epiphytes	Macroalgae		Water Column Nutrients	Water Column Turbidity
Spatial patterns and environmental correlates in leaf-associated epifaunal assemblages of temperate seagrass (Zostera marina) meadows	Gulstrom et al.	2012	2022-10-08	Sarah Joy Bittick	Field	Survey			marina		36 meadows, 3 regions in Sweden	(57º52′–59º00′ N, 10º59′–11º53′ E	57.8667	10.9833	Hydrodynamics	Sediment			Plant, Community, & Environment	Shoot Density				Organismal Diversity	Invertebrates	Epiphytes		Sediment Characteristics						3 regions sweden	59º00′ N, 10º59′–11º53′ E	59	11.8833	3rd region Sweden		58.2744	11.4411
Spatial patterns and predictor variables vary among different types of primary producers and consumers in eelgrass (Zostera marina) beds	Mizuho Namba and Masahira Nakaoka	2018	2022-11-06	Mehana Muranaka	Field	Survey			marina	caespitosa, japonica	Akkeshi-ko Lagoon in eastern Hokkaido		43.0379	144.887	Nutrients	Light	Salinity		Plant & Community	Growth				Macroalgae	Invertebrates	Distribution						Chlorophyll A		Saroma-ko lagoon, eastern Hokkaido		44.1371	143.819	Notoro-ko lagoon, easterns Hokkaido		44.046	144.146
Spatial patterns of seagrass dispersal and settlement	Grech et al	2016	2023-01-01	Hannah Lyford			Model		mulleri		Central Great Barrier Reef Coast, Australia	19.247357 S, 146.832108 E	-19.2474	146.832	Hydrodynamics	Habitat Fragmentation			Plant & Community	Physiological Measures	Reproductive Output			Distribution	Organismal Diversity
Spatial variation in reproductive effort of a southern Australian seagrass	Smith et al. 2016	2016	2022-07-17	Hannah Lyford	Field	Survey			nigricaulis		Swan Bay, Port Phillip Bay, Victoria, Australia	38.2266° S, 144.6491° E	-38.2266	144.649	Anthropogenic Use	Nutrients	Light		Plant, Community, & Environment	Shoot Density	Reproductive Output			Distribution				Water Column Nutrients						Geelong Arm, Port Phillip Bay, Victoria, Australia	-38.150002, 144.350006	-38.15	144.35
Spatial Variation of Macroinfaunal Communities Associated with Zostera marina Beds Across Three Biogeographic Regions in Atlantic Canada	Cullain, McIver, Schmidt, & Lotze	2018	2023-01-11	Hannah Lyford	Field	Survey			marina		Gulf of St. Lawrence, New Brunswick, Canada	46.882496, -64.713928	46.8825	-64.7139	Invertebrates	Nutrients	Sediment	Light	Plant, Community, & Environment	Shoot Density	Physiological Measures	Photosynthetic Output		Distribution	Microbial Diversity	Organismal Diversity	Invertebrates	Water Column Turbidity	Water Column Nutrients	Water Column Temperature	Sediment Nutrients			Scotian Shelf, Nova Scotia, Canada	43.998980, -62.000730	43.999	-62.0007	Newfoundland-Labrador Shelf, Canada	48.779939, -53.657810	48.7799	-53.6578
Spatial-temporal variations in the composition of two Zostera species in a seagrass bed: implications for population management of a commercially exploited grass shrimp	Yusa, Shoji & Chiba	2018	2022-12-27	Hannah Lyford	Field	Survey		Management	marina	caespitosa	Lake Notoro, Japan	44.056727 N, 144.141417 E	44.0567	144.141	Seagrass competition	Light	Habitat Fragmentation	Aquaculture Impacts	Plant, Community, & Environment	Shoot Density	Shoot Survival	Growth		Distribution	Seagrass competition	Invertebrates	Organismal Diversity	Water Column Turbidity
[truncated: 169 more rows]
[truncated: 13 more columns]

## Sheet: Metadata
Column Label	Category	Drop Down Values	Description of Data Entry
A	Title	-	Title of the article
[truncated: 91 more rows]
