# Supplementary material for: Understanding trends in Zostera research, stressors, and response variables: a global systematic review of the seagrass genus
Source: PeerJ. 2025 Apr 17;13:e19209. doi: 10.7717/peerj.19209 (PMC12009562; doi:10.7717/peerj.19209)
Supplement: Supplemental Information 7 [file peerj-13-19209-s007.xlsx]

## Sheet: Extraction Form
Supplemental Data Form S4.2, Example Extraction Form
Title	Authors	PubYear	Date Assessed	Person Extracting Data	Study Design	Study Type	Other Study	Management/Restoration	Zostera Species	Zostera Species 2	Location-Name	Location-GPS	Latitude	Longitude	Stressor 1	Stressor 2	Stressor 3	Stressor 4	Plant, Community, or Environmental Response Variables?	Plant Response Variable 1	Plant Response Variable 2	Plant Response Variable 3	Plant Response Variable 4	Community Response Variable 1	Community Response Variable 2	Community Response Variable 3	Community Response Variable 4	Environment Response Variable 1	Environment Response Variable 2	Environment Response Variable 3	Environment Response Variable 4	Additional Stressor	Additional Response Variable	Location 2-Name	Location 2- GPS	lat 2	lon 2	Location 3-Name	Location 3-GPS		lon 3	Location 4-Name	Location 4-GPS	lat 4	lon 4	Location 5-Name	Location 5-GPS	lat 5	lon 5
[truncated: 13 more columns]

## Sheet: Metadata
Column Label	Category	Drop Down Values	Description of Data Entry
A	Title	-	Title of the article
B	Authors	-	Authors of the article in the format "Author1 YEAR", "Author1 & Author 2 YEAR", or "Author1 et al. YEAR" depending on the number of authors
C	Publication Year
D	Date Assessed	-	Date the article was assessed and data was extracted from it.
E	Person Extracting Data	-	The full name (First Last) of the person who assessed the article and extracted data.
F	Study Design	Mesocosm
		Field
		Model
G	Study Type	Survey
H		Manipulative
	Other Study	Technical Report
		Review
		Model
I	Management/Restoration	Management
		Restoration
J,K	Species	marina
		pacifica
		mulleri
		noltii
		japonica
		capricornii
		caulescens
		tasmanica
		nigricaulis
		angustifolia
		asiatica
		mucronata
		polychlamys
		novazelandica
		kiewiensis
		caespitosa
		capensis
		chilensis
L	Location-Name	-	The location of the study in words - include as much detail as possible - e.g. "Off Dockweiler Pier in Santa Monica Bay, California, USA"
M	Location-GPS	-	GPS coordinates for the study location if provided. Format: Degrees, minutes, and seconds (DMS); Ex: 41°24'12.2"N 2°10'26.5"E
N	Latitude		latitude in decimal degrees without symbols, EX: 43.867778 (use calculator if needed: https://www.pgc.umn.edu/apps/convert/)
O	Longitude		longitude in decimal degrees without symbols, EX: -124.020972 (use calculator if needed: https://www.pgc.umn.edu/apps/convert/)
P,Q,R,S	Stressor [1-4]	Light
		Temperature
		Sediment
		Salinity
		Nutrients
		Acidification
		Carbon
		Aquaculture Impacts	Oyster farming, fish farms, kelp cultivation
		Hydrodynamics	Storms, Waves
		Oxygen
		Herbivory	Grazing, Animal Use
		Pathogens	Seagrass Wasting Disease, Other Diseases Mentioned
		Habitat Fragmentation
		Invasion
		Drought
		Epiphytes
		Invertebrates
		Herbicides
		Genomics/Genetic Diversity	Including Mention of Genotypic Diversity & Gene Expression
		Toxins	Including Metals & Sulfides/Sulfur
		Seagrass competition	+/- Interactions with Other Species of Seagrass
		Microbiome
		Anthropogenic Use	Tourism, Boating, Oil Spills, Dredging, Building
T	Plant, Community, or Environmental Response Variables?	Plant
		Community
		Environment
		Plant & Community
		Plant & Environment
		Community & Environment
		Plant, Community, & Environment
U,V,W,X	Plant Response Variables [1-4]	Shoot Density
		Growth	Change in Length, Change in Biomass
		Physiological Measures	Chlorophyll A, Carbohydrates, Nutrients
		Reproductive Output
		Photosynthetic Output
Y,Z,AA,AB	Community Response Variables [1-4]	Invertebrates
		Microbial Diversity
		Distribution	Change in meadow surface area cover
		Epiphytes
		Organismal Diversity
		Macroalgae
		Seagrass competition
		Chlorophyll A	CaCO3, Grain Size, Carbon Redox Potential, Storage, Oraganic Matter
AC,AD,AE,AF	Environmental Response Variables [1-4]	Sediment Characteristics
		Water Column Nutrients
		Sediment Nutrients
		Water Column Salinity
		Water Column Temperature
		Water Column Dissolved Oxygen
		Water Column pH
		Water Column Turbidity
AG	New Stressor		if there is a stressor not in the dropdown, List it here (Or additional stressors)
AH	Additional Response Variables
AI-BJ	Additional location(s)		if your paper has more than 1 site, list up to 8 locations from the paper. Make sure to include lat [2-8], lon [2-8]. If there are more than 8 sites, only include 8
BK	Notes		any other notes you want to take should be in this last column
