# Supplementary material for: Understanding trends in Zostera research, stressors, and response variables: a global systematic review of the seagrass genus
Source: PeerJ. 2025 Apr 17;13:e19209. doi: 10.7717/peerj.19209 (PMC12009562; doi:10.7717/peerj.19209)
Supplement: Supplemental Information 11 [file peerj-13-19209-s011.xlsx]

## Sheet: 1829_2023-10-14 (1)
Supplemental Data S7.1 List of Articles Excluded at the Title and Abstract Screening Phase, and Exclusion Decision
id	title	publication_year	authors	t&a_exclusion_reasons
1975596	In situ O-2 dynamics in submerged Isoetes australis: varied leaf gas permeability influences underwater photosynthesis and internal O-2	2011	{"Colmer, Timothy David","Pedersen, Ole","Pulido, Cristina","Rich, Sarah Meghan"}	{"Non Zostera"}
1976196	Mangrove-Exported Nutrient Incorporation by Sessile Coral Reef Invertebrates	2009	{"Compton, Jana E.","Granek, Elise F.","Phillips, Donald L."}	{"Non Seagrass"}
1977504	Inorganic nutrient and oxygen fluxes across the sediment-water interface in the inshore macrophyte areas of a shallow estuary (Lake Illawarra, Australia)	2003	{"Morrison, RJ","Qu, WC","West, RJ"}	{"Non Seagrass"}
1977266	Toxic metals in aquatic plants surviving in surface water polluted by copper mining industry	2004	{"Kempers, AJ","Samecka-Cymerman, A"}	{"Non Zostera"}
1974158	Trophic connectivity and basal food sources sustaining tropical aquatic consumers along a mangrove to ocean gradient	2015	{"Araujo, Francisco Gerson","Claudino, Marlucy Coelho","Garcia, Alexandre Miranda","Machado Pessanha, Andre Luiz"}	{"Non Seagrass","Coastal Habitat"}
1974816	Growth potential and predation risk drive ontogenetic shifts among nursery habitats in a coral reef fish	2014	{"Grol, Monique G. G.","Nagelkerken, Ivan","Rypel, Andrew L."}	{"No Stressor/Restoration"}
1972923	Effects of salinity and temperature on the performance of Cymodocea nodosa and Ruppia cirrhosa: a medium-term laboratory study	2019	{"Exadactylos, Athanasios","Katsaros, Christos","Orfanidis, Sotiris","Papathanasiou, Vasillis","Tsioli, Soultana"}	{"Non Zostera"}
1973051	Fish larvae distribution among different habitats in coastal East Africa	2019	{"Gullstrom, Martin","Hedberg, Per","Jiddawi, Narriman S.","Rybak, Fanny F.","Winder, Monika"}	{"Non Zostera"}
1975189	Varying energetic costs of Brent Geese along a continuum from aquatic to agricultural habitats: the importance of habitat-specific energy expenditure	2013	{"Clausen, Kevin Kuhlmann","Clausen, Preben","Faelled, Casper Caesar","Fox, Anthony David","Madsen, Jesper"}	{"Non Seagrass"}
1978669	ENVIRONMENTAL-EFFECTS OF A HARD CLAM (MERCENARIA-MERCENARIA) AQUACULTURE SITE IN THE INDIAN RIVER LAGOON, FLORIDA	1993	{"MOJICA, R","NELSON, WG"}	{"Non Zostera"}
1974895	Feeding river crab includes building pond, clearing pond, applying bio-organic fertilizer, stocking crab, preparing feed, clearing pool periodically, changing water, and feeding at a specified frequency and time	NA	{"SHEN J"}	{"Non Seagrass"}
1975799	A Rapid Marine Biodiversity Assessment of the Coral Reefs of Northeast Madagascar.	2011	NA	{"Non Seagrass","Coastal Habitat"}
1977950	Influence of water temperature on the efficacy of diquat and endothall versus curlyleaf pondweed	2000	{"Madsen, JD","Netherland, MD","Owens, CS","Skogerboe, JD"}	{"Non Seagrass"}
1974652	Environmental conditions of Chilika Lake during pre and post hydrological intervention: an overview	2014	{"Panigrahy, R. C.","Pati, Premalata","Sahu, Biraja Kumar"}	{"Non Zostera"}
1973296	Application of Landsat Data for Mapping Higher Aquatic Vegetation of the Far East Marine Reserve	2018	{"Bazarov, K. Yu.","Egidarev, E. G.","Lebedev, A. M.","Zharikov, V. V."}	{"No Stressor/Restoration"}
1977080	Seasonal and diurnal variations in methane emissions from Wuliangsu Lake in arid regions of China	2005	{"Duan, XN","Mu, YJ","Ouyang, ZY","Wang, XK"}	{"Non Zostera"}
1977107	Nutrients increase epiphyte loads: broad-scale observations and an experimental assessment	2005	{"Connell, SD","Elsdon, TS","Gillanders, BM","Russell, BD"}	{"Non Seagrass"}
1976384	Seagrass as the main food source of Neaxius acanthus (Thalassinidea: Strahlaxiidae), its burrow associates, and of Corallianassa coutierei (Thalassinidea: Callianassidae)	2008	{"Asmus, Harald","Kneer, Dominik","Vonk, Jan Arie"}	{"Non Zostera"}
2545929	Carbon Sources of Sediment and Epifaunal Food Sources in a Tropical Mangrove Forest in North Sulawesi, Indonesia	2020	{"Chen Bin","Chen Guangcheng","Chen Shunyang","Dhamawan, I. Wayan Eka","Ernawati, Widyastuti","Rianta, Pratiwi","Sastrosuwondo, Pramudji","Wu Zhiqiang","Xie Limei"}	{"Non Seagrass","Coastal Habitat"}
1974386	Epiphyte presence and seagrass species identity influence rates of herbivory in Mediterranean seagrass meadows	2015	{"Cebrian, Just","Heck, Kenneth L.","Luis Sanchez-Lizaso, Jose","Marco-Mendez, Candela","Miguel Ferrero-Vicente, Luis","Prado, Patricia"}	{"Non Zostera"}
1973469	Recreating the shading effects of ship wake induced turbidity to test acclimation responses in the seagrass Thalassia hemprichii	2017	{"Browne, Nicola K.","Tay, Jason K. L.","Todd, Peter A.","Yaakub, Siti Maryam"}	{"Non Zostera"}
1977801	Genetic homogeneity in the seagrass Cymodocea nodosa at its northern Atlantic limit revealed through RAPD	2001	{"Alberto, F","Mata, L","Santos, R"}	{"Non Zostera"}
1978863	SUBLETHAL EFFECTS AND BIOACCUMULATION OF CADMIUM, CHROMIUM, COPPER AND ZINC IN THE MARINE AMPHIPOD ALLORCHESTES-COMPRESSA	1991	{"AHSANULLAH, M","WILLIAMS, AR"}	{"Non Seagrass"}
1974783	Conservation genetics of Australasian sailfin lizards: Flagship species threatened by coastal development and insufficient protected area coverage	2014	{"Brown, Rafe M.","Lira-Noriega, Andres","Siler, Cameron D."}	{"Non Seagrass"}
1978081	Competition between Hydrilla verticillata and Vallisneria americana as influenced by soil fertility	1999	{"Center, TD","Van, TK","Wheeler, GS"}	{"Non Zostera","No Restoration Mentioned"}
1976906	Ecological performance of red drum (Sciaenops ocellatus) larvae exposed to environmental levels of the insecticide malathion	2006	{"Alvarez, Maria del Carmen","Fuiman, Lee A."}	{"Non Seagrass"}
1978360	Relationship between porewater organic carbon content, sulphate reduction and nitrogen fixation (acetylene reduction) in the rhizosphere of Zostera noltii	1996	{"Bourgues, S","Herbert, RA","Wellsbury, P","Welsh, DT","deWit, R"}	{"No Stressor/Restoration"}
1977540	Seasonal occurrence of male Antillean manatees (Trichechus manatus manatus) on the Belize Barrier Reef.	2003	{"LaCommare, Katherine S.","Packard, Jane M.","Self-Sullivan, Caryn","Smith, Gregory W."}	{"Non Zostera"}
1974353	Particulate Matter in Mangrove Forests and Seagrass Beds as a Nitrogen Source in Tropical Coastal Ecosystems	2015	{"Bouma, Tjeerd J.","Cathalot, Cecile","Gillis, Lucy G.","Herman, Peter M.","Ziegler, Alan D."}	{"Non Zostera"}
1978727	MANAGING THE AQUATIC ENVIRONMENT	1993	{"ATKINS, RP","DEELEY, DM","MCALPINE, KW"}	{"Non Seagrass"}
1973810	Bubble Curtains: Herbivore Exclusion Devices for Ecology and Restoration of Marine Ecosystems?	2017	{"Bennett, Scott","Wernberg, Thomas","de Bettignies, Thibaut"}	{"Non Seagrass"}
1975149	Water chemistry preferences of five nonnative aquatic macrophyte species in Connecticut: a preliminary risk assessment tool	2013	{"Bugbee, Gregory","Gallagher, Frank","Gibbons, Jordan","June-Wells, Mark"}	{"Non Zostera","No Restoration Mentioned"}
1974139	Cross-shelf transport, oxygen depletion, and nitrate release within a forming mesoscale eddy in the eastern Indian Ocean	2016	{"Beckley, Lynnath E.","Feng, Ming","Guidi, Lionel","Holliday, David","Landrum, Jason P.","Montoya, Joseph","Paterson, Harriet","Raes, Eric J.","Thompson, Peter A.","Waite, Anya M."}	{"Non Seagrass","Coastal Habitat"}
1978183	Seasonal variation of in situ feeding rates by the temperate ascidian Halocynthia papillosa	1998	{"Coma, R","Gili, JM","Ribes, M"}	{"Non Seagrass"}
1976058	Effect of seed density and sediment nutrient heterogeneity on recruitment and early patch growth in the seagrass Cymodocea nodosa	2010	{"Balestri, E.","Lardicci, C.","Vallerini, F."}	{"Non Zostera"}
1974465	Age and size compositions, habitats, growth and reproductive characteristics of a terapontid (Pelates octolineatus) in coastal waters	2015	{"Coulson, Peter","Hall, Norman","Hesp, Alex","Potter, Ian C.","Veale, Lauren"}	{"Non Seagrass"}
1974697	FLORIDA GULF BAY SCALLOP (ARGOPECTEN IRRADIANS CONCENTRICUS) POPULATION GENETIC STRUCTURE: FORM, VARIATION, AND INFLUENTIAL FACTORS	2014	{"Arnold, William S.","Bert, Theresa M.","Mcmillen-Jackson, Anne L.","Seyoum, Seifu","Stephenson, Sarah P.","Weisberg, Robert H.","Wilbur, Ami E.","Yarbro, Laura A."}	{"Non Seagrass"}
2100094	Effects of temperature and habitat on egg hatching time in the marine snail Lacuna vincta	2020	{"Mutsuddy, A.","Seroy, S. K.","Stewart, K."}	{"Non Seagrass","Non Zostera","No Stressor/Restoration","No Restoration Mentioned"}
1974184	Acute and additive toxicity of ten photosystem-II herbicides to seagrass	2015	{"Collier, Catherine J.","Flores, Florita","Negri, Andrew P.","Wilkinson, Adam D."}	{"Non Zostera"}
1973598	Enrichment and Physiological Characterization of a Cold-Adapted Nitrite-Oxidizing Nitrotoga sp from an Eelgrass Sediment	2017	{"Fujitani, Hirotsugu","Ishii, Kento","Nakagawa, Tatsunori","Soh, Kentaro","Takahashi, Reiji","Tsuneda, Satoshi"}	{"No Stressor/Restoration"}
1975609	Posidonia oceanica (L.) fibers as a potential low-cost adsorbent for the removal and recovery of orthophosphate	2011	{"Ben Hassine, Rafik","Jellali, Salah","Wahab, Mohamed Ali"}	{"Non Zostera"}
2545945	Increasing salinization and organic carbon burial rates in seagrass meadows from an anthropogenically-modified coastal lagoon in southern Gulf of Mexico	2020	{"Avila, Enrique","Carnero-Bravo, Vladislav","Carolina Ruiz-Fernandez, Ana","Cuellar-Martinez, Tomasa","Gilberto Cardoso-Mohedano, Jose","Hascibe Perez-Bernal, Libia","Sanchez-Cabeza, Joan-Albert"}	{"Non Zostera"}
1977770	The photosynthetic capacity of the seagrass Posidonia oceanica: influence of nitrogen and light	2001	{"Alcoverro, T","Ballesteros, E","Cerbian, E"}	{"Non Zostera"}
1972457	Distribution of n-alkanes and their delta H-2 and delta C-13 values in typical plants along a terrestrial-coastal-oceanic gradient	2020	{"He, Ding","Jaffe, Rudolf","Ladd, S. Nemiah","Mead, Ralph N.","Saunders, Colin J."}	{"No Stressor/Restoration"}
1974925	Hydrographic and sediment characteristics of seagrass meadows of the Gulf of Mannar Marine Biosphere Reserve, South India	2013	{"Anantharaman, Perumal","Arumugam, Radjassegarin","Kannan, Rengasamy Ragupathi Raja","Saravanan, Kannan Rajasekaran","Thangaradjou, Thirunavukarasu"}	{"No Restoration Mentioned"}
1977684	Microbial communities and their interactions in soil and rhizosphere ecosystems	2002	{"Kent, AD","Triplett, EW"}	{"Non Seagrass"}
2100164	Biogeography, benthic ecology and habitat classification schemes	2020	{"BE Harris, PT","Baker, E","Harris, Peter T."}	{"Non Seagrass"}
1979224	FACTORS DETERMINING VARIOUS FORMS IN CLADOSIPHON-ZOSTERAE (PHAEOPHYCEAE)	1979	{"LOCKHART, JC"}	{"Non Seagrass"}
1978154	The role of the remnant leaf sheaths (scales) attached to the Posidonia oceanica (L.) Delile rhizomes	1998	{"Alcoverro, T","Manzanera, M","Romero, J"}	{"Non Zostera"}
1976022	Life in (and out of) the lagoon: fine-scale movements of green turtles tracked using time-depth recorders	2010	{"Austin, T. J.","Blumenthal, J. M.","Bothwell, J. B.","Broderick, A. C.","Ebanks-Petrie, G.","Godley, B. J.","Olynik, J. R.","Orr, M. F.","Solomon, J. L.","Witt, M. J."}	{"Non Seagrass"}
1975477	Drift algae, an invasive snail and elevated temperature reduce ecological performance of a warm-temperate seagrass, through additive effects.	2012	{"Hoeffle, Hannes","Holmer, Marianne","Thomsen, Mads S.","Wernberg, Thomas"}	{"Non Zostera"}
1979107	THE MEASUREMENT OF PRIMARY PRODUCTION PROBLEMS AND RECOMMENDATIONS	1983	{"COLIJN F","GIESKES W W C","ZEVENBOOM W"}	{"Non Seagrass"}
1976010	Automated pressure activated sampling system for detecting e.g. ammonium nitrate-based explosive in luggage in airport, has sample collector for collecting samples of substances removed from item by rapid decompression	NA	{"BROMBERG E E A","FINE D H","KONDURI R K","MACUSZONOK H","MOY E","RIOS Y M"}	{"Non Seagrass"}
1978351	Nutrient control of algal growth in estuarine waters. Nutrient limitation and the importance of nitrogen requirements and nitrogen storage among phytoplankton and species of macroalgae	1996	{"Borum, J","Pedersen, MF"}	{"Non Seagrass"}
1977989	Seagrass biomass and production: a reassessment	1999	{"Chiscano, CL","Duarte, CM"}	{"No Stressor/Restoration"}
1974491	MODELING SEAGRASS GROWTH UNDER EFFECTS OF HEAVY METALS IN ESTUARINE WETLANDS	2015	{"BE Mynett, A","Lin, Haiying","Sun, Tao"}	{"Non Zostera"}
1977288	Life history and ecology of seahorses: implications for conservation and management	2004	{"Foster, SJ","Vincent, ACJ"}	{"Non Seagrass"}
1975637	Leaf reddening in the seagrass Thalassia testudinum in relation to anthocyanins, seagrass physiology and morphology, and plant protection	2011	{"Novak, Alyssa B.","Short, Frederick T."}	{"Non Zostera"}
1974110	Small Estuarine and Non-Estuarine Mangrove Ecosystems of Tanzania: Overlooked Coastal Habitats?	2016	{"BE Diop, S","Igulu, M. M.","Kimirei, I. A.","Lugendo, B. R.","Machiwa, J","Scheren, P","Semba, M."}	{"Non Seagrass","Non Zostera","No Stressor/Restoration","No Restoration Mentioned"}
1977465	Starch degradation and sucrose metabolism during anaerobic growth of pondweed (Potamogeton distinctus A. Benn.) turions	2003	{"Harada, T","Ishizawa, K"}	{"Non Seagrass"}
1974764	Competitive Interactions Between Two Salt Marsh Halophytes Across Stress Gradients	2014	{"Nalini Morzaria-Luna, Hem","Zedler, Joy B."}	{"Non Seagrass"}
1973165	Effects of an experimental heat wave on fatty acid composition in two Mediterranean seagrass species	2018	{"Beca-Carretero, Pedro","Bernardeau-Esteller, Jaime","Garcia-Munoz, Rocio","Guiheneuf, Freddy","Marin-Guirao, Lazar","Ruiz, Juan M.","Stengel, Dagmar B."}	{"Non Zostera"}
1973642	Variation in delta C-13 and delta N-15 values suggests a coupling of host and symbiont metabolism in the Symbiodinium-Cassiopea mutualism	2017	{"Baker, David M.","Easson, Cole G.","Freeman, Christopher J.","Matterson, Kenan O.","Stoner, Elizabeth W."}	{"Non Zostera"}
1974263	A tale of two invaders: divergent spreading kinetics of the alien green algae Caulerpa taxifolia and Caulerpa cylindracea	2015	{"Bianchi, Carlo Nike","Montefalcone, Monica","Morri, Carla","Parravicini, Valeriano"}	{"Non Seagrass"}
1973633	Impacts of Mangrove Density on Surface Sediment Accretion, Belowground Biomass and Biogeochemistry in Puttalam Lagoon, Sri Lanka	2017	{"Huxham, M.","Jayatissa, L. P.","Krauss, K. W.","Kumara, M. P.","Phillips, D. H."}	{"Non Seagrass","Coastal Habitat"}
1973974	The feeding ecology of penaeid shrimp in tropical lagoon-estuarine systems	2016	{"Arenas-Fuentes, Virgilio","Arredondo-Figueroa, Jose L.","Cifuentes-Lemus, Juan L.","Gutierrez, Jesus C. S.","Pineda-Jaimes, Noel B.","Ponce-Palafox, Jesus T."}	{"Non Seagrass"}
1977166	Ecology of Sydney plant species - Part 10 Monocotyledon families Lemnaceaeto Zosteraceae	2005	{"Benson, Doug","McDougall, Lyn"}	{"No Stressor/Restoration"}
1973671	Phytoplankton biomass in a subtropical estuary: drivers, blooms, and ecological functions assessed over space and time using structural equation modeling	2017	{"Proffitt, C. Edward"}	{"Non Seagrass","Non Zostera"}
1977409	Local adaptation of the pondweed Potamogeton pectinatus to contrasting substrate types mediated by changes in propagule provisioning	2003	{"Hangelbroek, HH","Santamaria, L","de Boer, T"}	{"Non Seagrass"}
1972553	Understanding the fate of shrimp aquaculture effluent in a mangrove ecosystem: Aiding management for coastal conservation	2020	{"Chaiharn, Chatdanai","Hargan, Kathryn E.","Los Huertos, Marc","McAdoo, Brian","Nuangsaeng, Bunlung","Siriwong, Sarawut","Tassawad, Pisut","Williams, Branwen"}	{"Non Seagrass","No Restoration Mentioned","Coastal Habitat"}
1976001	Tissue mineral nutrient content in turions of aquatic plants: does it represent a storage function?	2010	{"Adamec, Lubomir"}	{"Non Seagrass"}
1975155	Determination of Ni, Cr, Cu, Pb and Cd on the Mediterranean endemic plant Posidonia oceanica using the green extraction method "Microwave Assisted Micellar Extraction" and GFAAS	2013	{"Hernandez-Martinez, Ana M.","Padron-Sanz, Carolina"}	{"Non Zostera"}
1978482	COMPARISON OF INTERTIDAL HABITAT USE AND GROWTH-RATES OF 2 NORTHERN PUGET-SOUND COHORTS OF 0+ AGE DUNGENESS CRAB, CANCER-MAGISTER	1995	{"ARMSTRONG, DA","DINNEL, PA","MCMILLAN, RO"}	{"No Stressor/Restoration"}
1975801	Bivalve shellfish aquaculture and eutrophication	2011	{"BE Shumway, SE","Burkholder, JoAnn M.","Shumway, Sandra E."}	{"Non Seagrass","Coastal Habitat"}
1977535	The no-take research natural area of Dry Tortugas National Park (Florida): Wishful thinking or responsible planning?	2003	{"Brock, Robert J.","Culhane, Brien D."}	{"Non Zostera"}
1977961	Effects of the disposal of reverse osmosis seawater desalination discharges on a seagrass meadow (Thalassia testudinum) offshore of Antigua, West Indies	2000	{"BE Bortone, SA","Blake, NJ","Dye, CW","Hammond, MA","Tomasko, DA"}	{"Non Zostera"}
1974131	The relative importance of trait vs. genetic differentiation for the outcome of interactions among plant genotypes	2016	{"Abbott, Jessica M.","Stachowicz, John J."}	{"No Stressor/Restoration"}
1973122	Dinitrogen (N-2) fixation rates in a subtropical seagrass meadow measured with a direct N-15-N-2 tracer method	2018	{"Carlson-Perret, Natasha L.","Erler, Dirk, V","Eyre, Bradley D."}	{"No Stressor/Restoration"}
1979337	Vegetative characteristics and waterfowl usage of a Montana water area	1965	{"KNIGHT, RICHARD R."}	{"Non Zostera"}
1976426	Hydrophonic cultivating medium for e.g. tomato plant, has plastic envelope pierced of opening permitting to cultivate compacted and dried aquatic weeds that contain endogeneous product e.g. zosteric acid and zosterine	NA	{"FLOURY H","JACOB B","LE DEIT H","SASSI J","SASSI J F"}	{"No Stressor/Restoration"}
1974147	Mangrove and Seagrass Beds Provide Different Biogeochemical Services for Corals Threatened by Climate Change	2016	{"Camp, Emma F.","Gendron, Gilberte","Jompa, Jamaluddin","Manfrino, Carrie","Smith, David J.","Suggett, David J."}	{"No Stressor/Restoration","Coastal Habitat"}
1975081	Using community knowledge in data-deficient regions: conserving the Vulnerable dugong Dugong dugon in the Sulu Sea, Malaysia	2013	{"Rajamani, Leela"}	{"No Restoration Mentioned"}
1974686	Light requirements of seagrasses determined from historical records of light attenuation along the Gulf coast of peninsular Florida	2014	{"Choice, Zanethia D.","Frazer, Thomas K.","Jacoby, Charles A."}	{"Non Zostera"}
1973964	Spatial and Temporal Variation in the Effects of Climatic Variables on Dugong Calf Production	2016	{"Delean, Steven","Fuentes, Mariana M. P. B.","Grayson, Jillian","Lavender, Sally","Logan, Murray","Marsh, Helene"}	{"Non Seagrass","Non Zostera"}
1977228	Abundance and species richness of fish associated to Thalassia testudinum at Cariaco Gulf, Venezuela	2004	{"Jimenez, M","Pena, TA","Villafranca, S"}	{"Non Zostera"}
1976387	Sediment type, population density and their combined effect greatly charge the short-time growth of two common submerged macrophytes	2008	{"An, Shuqing","Cai, Ying","Guan, Baohua","Jiang, Jinhui","Yang, Haibo","Zhou, Changfang"}	{"Non Seagrass","Non Zostera","No Restoration Mentioned"}
1976027	Effect of macrophyte community composition and nutrient enrichment on plant biomass and algal blooms	2010	{"Bakker, E. S.","Declerck, S. A. J.","Helmsing, N. R.","Hidding, B.","Nolet, B. A.","Van Donk, E."}	{"Non Seagrass"}
1978870	CHEMICAL CHARACTERISTICS ON MARINE LITTORAL ECOSYSTEMS	1991	{"SCHRAMM W"}	{"Non Seagrass"}
1973499	Evidence for Habitat Residency and Isotopic Niche Partitioning in a Marine-Estuarine-Dependent Species Associated with Mangrove Habitats from the East Coast of South Africa	2017	{"Muller, Cuen","Strydom, Nadine A."}	{"Non Zostera"}
1972650	WAMSI 2 - Dredging Science Node - Project 5.3 - Natural Dynamics	2020	{"Bearham, Douglas","Haywood, Mick","Lavery, Paul","McCallum, Roisin","McLaughlin, James","McMahon, Kathyrn","Mortimer, Nick","Vanderklift, Mat"}	{"Non Zostera"}
1974432	Marine Turtles of the Red Sea	2015	{"BE Rasul, NMA","El-Alwany, Magdy A. N.","Elsadek, Islam","Mancini, Agnese","Stewart, ICF"}	{"Non Seagrass","Non Zostera"}
1976591	Inorganic phosphorus uptake in a carbonate-dominated seagrass ecosystem	2007	{"Koch, Marguerite S.","Madden, Christopher J.","Nielsen, Ole I."}	{"Non Zostera"}
1978612	SUBMERGED MACROPHYTES IN THE RECENTLY FRESHENED LAKE SYSTEM VOLKERAK-ZOOM (THE NETHERLANDS), 1987-1991	1994	{"SCHUTTEN, J","SMIT, H","VANDERVELDEN, JA"}	{"Non Seagrass"}
1975807	Climate Regulation as a Service from Estuarine and Coastal Ecosystems	2011	{"BE Wolanski, E","Costanza, R.","Heckbert, S.","McLusky, D","Poloczanska, E. S.","Richardson, A. J."}	{"Coastal Habitat"}
1977635	Shoot and abundance characteristics of the seagrass Heterozostera tasmanica in Westernport estuary (south-eastern Australia)	2002	{"Campbell, SJ","Miller, CJ"}	{"Non Zostera","No Stressor/Restoration"}
1975556	Seawater quality and microbial communities at a desalination plant marine outfall. A field study at the Israeli Mediterranean coast	2011	{"Drami, Dror","Kress, Nurit","Stambler, Noga","Yacobi, Yosef Z."}	{"Non Seagrass"}
1979338	Effects of sodium chloride on the sago pondweed	1965	{"TEETER, JAMES W."}	{"Non Seagrass"}
1976895	Near-infrared reflectance spectroscopy is a rapid, cost-effective predictor of seagrass nutrients	2006	{"Aragones, L","Berding, N","Foley, W","Lawler, IR","Marsh, H"}	{"No Stressor/Restoration"}
1974015	Quantifying exceptionally large populations of Acropora spp. corals off Belize using sub-meter satellite imagery classification	2016	{"Busch, James","Curran, H. Allen","Greer, Lisa","Harbor, David","Lescinsky, Halard","Wirth, Karl","de Beurs, Kirsten"}	{"Non Seagrass"}
1978260	Dissolved inorganic nutrient fluxes from seasonal rivers into Gazi Bay, Kenya	1997	{"Mwashote, BM","Ohowa, BO","Shimbira, WS"}	{"Non Zostera"}
1978016	Testing the allometric scaling of alkaline phosphatase activity to surface/volume ratio in benthic marine macrophytes	1999	{"Andria, JR","Christmas, M","Hernandez, I","Whitton, BA"}	{"No Stressor/Restoration"}
1977084	Influence of submarine springs and wastewater on nutrient dynamics of Caribbean seagrass meadows	2005	{"Carruthers, TJB","Dennison, WC","van Tussenbroek, BI"}	{"Non Zostera"}
1976771	Nutrient characteristics and sediment texture of the seagrass beds of the Gulf of Mannar	2007	{"Kannan, L.","Thangaradjou, T."}	{"Non Zostera"}
1976034	Climate change	2010	{"BE Sodhi, NS","Ehrlich, PR","Lovejoy, Thomas E."}	{"Non Zostera"}
1977420	Effects of salinity changes on growth of Ruppia maritima L.	2003	{"La Peyre, MK","Rowe, S"}	{"Non Seagrass","Non Zostera","No Restoration Mentioned"}
1972861	Biomonitoring of Posidonia oceanica beds by a multiscale approach	2019	{"Bitonti, M. B.","Bruno, L.","Cozza, R.","Dattola, L.","Ferrari, M.","Pacenza, M.","Rende, F."}	{"Non Zostera"}
2100162	A new approach to monitoring Marine Protected Area Management Success in the Dutch Caribbean	2020	{"BE Humphreys, J","Clark, RWE","De Meyer, Kalli","MacRae, Duncan"}	{"Non Seagrass"}
1972877	The highly toxic and cryptogenic clinging jellyfish Gonionemus sp. (Hydrozoa, Limnomedusae) on the Swedish west coast	2019	{"Dahlgren, Thomas G.","Govindarajan, Annette F.","Kallstrom, Bjorn","Ostrnan, Carina","Selander, Erik"}	{"Non Seagrass","Non Zostera"}
1978944	AUTUMN FEEDING ECOLOGY OF HERBIVOROUS WILDFOWL IN THE DANISH WADDEN SEA AND IMPACT OF FOOD SUPPLIES AND SHOOTING ON MOVEMENTS	1988	{"MADSEN J"}	{"Non Seagrass"}
1976258	Biological synopsis of the Japanese skeleton shrimp (Caprella mutica)	2009	{"Sainte-Marie, Bernard","Turcotte, Christian"}	{"Non Seagrass"}
1977527	Critical evaluation of the nursery role hypothesis for seagrass meadows	2003	{"Hays, G","Heck, KL","Orth, RJ"}	{"No Stressor/Restoration"}
1973761	Ontogenetic changes in dietary carbon sources and trophic position of two co-occurring horseshoe crab species in southwestern China	2017	{"Chen, Chang-Po","Fan, Lan-Feng","Hsieh, Hwey-Lian","Liao, Yong-Yan","Qiu, Guanglong","Yang, Ming-Che"}	{"Non Zostera","Coastal Habitat"}
1975142	Effects of laying power cables on a Posidonia oceanica (L.) Delile prairie: the study case of Fiume Santo (NW Sardinia, Italy)	2013	{"Bacci, Tiziano","Di Tullio, Lorenzo","Gabellini, Massimo","Izzi, Alessia","Maggi, Chiara","Massara, Francesca","Nonnis, Ornella","Rende, Sante Francesco"}	{"Non Seagrass"}
1975583	Biological control of phytoplankton by the subtropical submerged macrophytes Egeria densa and Potamogeton illinoensis: a mesocosm study	2011	{"Declerck, Steven A. J.","Mazzeo, Nestor","Muylaert, Koenraad","Van Colen, Willem","Vanderstukken, Maarten"}	{"Non Seagrass"}
1978887	THE EFFICACY AND ECOLOGICAL IMPACTS OF HERBICIDE AND CUTTING REGIMES ON THE SUBMERGED PLANT-COMMUNITIES OF 4 BRITISH RIVERS .1. A COMPARISON OF MANAGEMENT EFFICACIES	1990	{"FOX, AM","MURPHY, KJ"}	{"Non Seagrass"}
1976833	Isolation and characterization of polyunsaturated fatty acid producing Thraustochytrium species: screening of strains and optimization of omega-3 production	2006	{"Barrow, Colin J.","Burja, Adam M.","Radianingtyas, Helia","Windust, Anthony"}	{"Non Seagrass"}
1975063	Mechanisms of bicarbonate use influence the photosynthetic carbon dioxide sensitivity of tropical seagrasses	2013	{"Campbell, Justin E.","Fourqurean, James W."}	{"Non Zostera"}
2099994	Dynamics of environmental conditions during the decline of a Cymodocea nodosa meadow	2020	{"Felja, Igor","Herndl, Gerhard J.","Ivancic, Ingrid","Ivesa, Ljiljana","Korlevic, Marino","Markovski, Marsej","Najdek, Mirjana","Paliaga, Paolo"}	{"Non Zostera"}
1975391	Pan-Arctic simulation of coupled nutrient-sulfur cycling due to sea ice biology: Preliminary results	2012	{"Deal, C.","Elliott, S.","Humphries, G.","Hunke, E.","Jeffery, N.","Jin, M.","Levasseur, M.","Stefels, J."}	{"Non Seagrass"}
1975656	Intra-annual Variability in Primary Producer Groups and Nitrogen Dynamics in an Intermittently Closed Estuary Exposed to Mediterranean Climate	2011	{"Haese, Ralf R.","Pronk, Geertje J."}	{"Non Zostera"}
1974529	17-year change in species composition of mixed seagrass beds around Santiago Island, Bolinao, the northwestern Philippines	2014	{"Fortes, Miguel D.","Go, Gay Amabelle","Miyajima, Toshihiro","Nadaoka, Kazuo","Nakaoka, Masahiro","Tanaka, Yoshiyuki","Uy, Wilfredo H.","Watanabe, Atsushi","Watanabe, Shuichi"}	{"Non Zostera"}
1978098	Clonal variation in a Florida Bay Thalassia testudinum meadow: molecular genetic assessment of population structure	1999	{"Childers, DL","Davis, JL","Kuhn, DN"}	{"Non Zostera"}
1974754	Trophic importance of meiofauna to polychaetes in a seagrass ( Zostera marina) bed as traced by stable isotopes	2014	{"Ha, Sun Yong","Kim, Dong-Sung","Min, Won-Ki","Shin, Kyung-Hoon"}	{"No Stressor/Restoration"}
1973730	Influence of wave climate on architecture and landscape characteristics of Posidonia oceanica meadows	2017	{"Borg, Joseph A.","Galdies, Charles","Malhotra, Amit","Pace, Matthew"}	{"Non Zostera"}
2545917	Ontogenetic resource use and trophic dynamics of endangered juvenileTachypleus tridentatusamong diversified nursery habitats in the northern Beibu Gulf, China	2020	{"Bopp, Justin","Chen, Qiao","Huang, Shuyan","Huang, Xing","Kwan, Kit Yue","Wang, Chun-Chieh","Wang, Xueping","Zhen, Wenquan","Zhu, Junhua"}	{"Non Seagrass"}
1978762	PHOTOSYNTHETIC RESPONSE TO LIGHT AND TEMPERATURE OF THE SEAGRASS CYMODOCEA-NODOSA AND THE PREDICTION OF ITS SEASONALITY	1992	{"PEREZ, M","ROMERO, J"}	{"Non Zostera"}
1978893	PHOSPHORUS-LIMITED GROWTH OF THE TROPICAL SEAGRASS SYRINGODIUM-FILIFORME IN CARBONATE SEDIMENTS	1990	{"CAPONE, DG","DENNISON, WC","SHORT, FT"}	{"Non Zostera"}
1973734	Driving forces of organic carbon spatial distribution in the tropical seascape	2017	{"Belshe, F. E.","Bouma, T. J.","Gillis, L. G.","Ziegler, A. D."}	{"Non Zostera"}
1976273	Mangroves and Seagrasses	2009	{"BE Hutchings, P","Duke, N. C.","HoeghGuldberg, O","Kingsford, M","Larkum, A. W. D."}	{"No Stressor/Restoration"}
1973985	Body shrinkage due to Arctic warming reduces red knot fitness in tropical wintering range	2016	{"Klaassen, Marcel","Lisovski, Simeon","Lok, Tamar","Meissner, Wlodzimierz","Ozarowska, Agnieszka","Piersma, Theunis","Rakhimberdiev, Eldar","Soloviev, Mikhail Y.","de Fouw, Jimmy","van Gils, Jan A."}	{"Non Zostera"}
1974478	Fractionation of Phosphorus in Steelmaking Slags and Aquatic Particulate Materials Using a Sequential Extraction Technique	2015	{"Nishijima, Wataru","Suzumura, Masahiro","Tsukasaki, Ayumi"}	{"Non Seagrass"}
1976745	Tropical seagrass species tolerance to hypersalinity stress	2007	{"Koch, M. S.","Kyhn-Hansen, C.","Madden, C. J.","Peters, J. S.","Schopmeyer, S. A."}	{"Non Zostera"}
1972583	Sources of Particulate Organic Matter across Mangrove Forests and Adjacent Ecosystems in Different Geomorphic Settings	2020	{"Friess, Daniel A.","Gillis, Lucy Gwen","Saavedra-Hortua, Daniel A.","Zimmer, Martin"}	{"Non Zostera"}
1978120	Light and carbon balance in the seagrass Thalassia testudinum: evaluation of current production models	1998	{"Dunton, KH","Herzka, SZ"}	{"Non Zostera"}
1977160	Seasonal variation in vegetative growth and production of the endemic Japanese seagrass Zostera asiatica: a comparison with sympatric Zostera marina	2005	{"Mukai, H","Nakaoka, M","Watanabe, M"}	{"No Stressor/Restoration"}
1976336	Disturbance mediates the effects of nutrients on developing assemblages of epibiota	2008	{"Connell, Sean D.","Hermelink, Bjoern","Molis, Markus","Stehbens, Jarrod D.","Valdivia, Nelson","Wahl, Martin"}	{"Non Seagrass"}
1978169	Competition between Chara aspera and Potamogeton pectinatus as a function of temperature and light	1998	{"Coops, H","Simons, J","Van den Berg, MS","de Keizer, A"}	{"Non Seagrass"}
1974273	Distribution, sources and photodegradation characteristics of chromophoric dissolved organic matter (CDOM) in seagrass bed ecosystem of Xincun Bay, Hainan Island	2015	{"Huang Xiao-ping","Jiang Zhi-jian","Lian Zhong-lian","Liu Song-lin","Wu Yun-chao","Zhang Jing-ping"}	{"Non Zostera"}
1977808	An experimental test of the mechanism by which suspension feeding bivalves elevate seagrass productivity	2001	{"Heck, KL","Peterson, BJ"}	{"Non Zostera"}
1977422	Flexible mating: cross-pollination affects sex-expression in a marine clonal plant	2003	{"Hammerli, A","Reusch, TBH"}	{"No Stressor/Restoration"}
1973164	Molecular level responses to chronic versus pulse nutrient loading in the seagrass Posidonia oceanica undergoing herbivore pressure	2018	{"Bulleri, Fabio","Marin-Guirao, Lazaro","Procaccini, Gabriele","Ravaglioli, Chiara","Ruocco, Miriam"}	{"Non Zostera"}
1978021	A pilot study of nutrient enriched sediments in a Cymodocea nodosa bed invaded by the introduced alga Caulerpa taxifolia	1999	{"Ceccherelli, G","Cinelli, F"}	{"Non Zostera"}
1977931	Nutrient mass balance of the seagrass Posidonia oceanica: the importance of nutrient retranslocation	2000	{"Alcoverro, T","Manzanera, M","Romero, J"}	{"Non Zostera"}
1978419	Developments in Hydrobiology, 117. Coastal Lagoon Eutrophication and Anaerobic processes (C.L.E.AN.): Nitrogen and sulfur cycles and population dynamics in coastal lagoons	1996	NA	{"No Stressor/Restoration"}
1978337	The effects of a record flood on the aquatic vegetation of the Upper Mississippi River System: Some preliminary findings	1996	{"Rogers, S","Spink, A"}	{"Non Zostera"}
1974306	Adaptability of subtropical algae to local microbial populations	2015	{"Carlson, S.","Ferguson, K.","Kwan, J.","Murphy, B. T.","Nelson, A.","Nguyen, T.","Puglisi, M. P.","Sears, J.","Tanouye, U.","Weyna, T."}	{"Non Seagrass"}
1975353	Negative relationships between the nutrient and carbohydrate content of the seagrass Thalassia testudinum	2012	{"Campbell, Justin E.","Fourqurean, James W.","Yarbro, Laura A."}	{"Non Zostera"}
1975094	Revealing organic carbon sources fueling a coral reef food web in the Gulf of Mexico using stable isotopes and fatty acids	2013	{"Aguiniga-Garcia, Sergio","Carreon-Palau, Laura","Parrish, Christopher C.","Perez-Espana, Horacio","del Angel-Rodriguez, Jorge A."}	{"Non Seagrass"}
1977610	An analysis of water column distributions in Florida Bay	2002	{"Burd, AB","Jackson, GA"}	{"Non Seagrass"}
1975415	Photosynthetic performance, epiphyte biomass and nutrient content of two seagrass species in two areas with different level of nutrients along the Dar es Salaam coast	2012	{"Mamboya, F. A.","Mvungi, E. F."}	{"Non Zostera"}
1976329	Photophysiological responses of Halophila johnsonii to experimental hyposaline and hyper-CDOM conditions	2008	{"Durako, Michael J.","Kahn, Amanda E."}	{"Non Zostera","No Restoration Mentioned"}
1974775	Modeling habitat and bycatch risk for dugongs in Sabah, Malaysia	2014	{"Briscoe, Dana K.","Hiatt, Seth","Hines, Ellen","Lewison, Rebecca"}	{"No Stressor/Restoration"}
1975358	Synthesis in Estuarine and Coastal Ecological Research: What Is It, Why Is It Important, and How Do We Teach It? (vol 35, pg 1, 2012)	2012	{"Boynton, Walter R.","Kemp, W. Michael"}	{"No Stressor/Restoration"}
1973158	Latitudinal variation in seagrass herbivory: Global patterns and explanatory mechanisms	2018	{"Czarnik, Rob","Doropoulos, Christopher","Llonch, Nil","McMahon, Kathryn","Poore, Alistair G. B.","Verges, Adriana"}	{"Non Zostera"}
1975192	Minimizing environmental risks on constructing marine pipelines: Aguilas desalination plant	2013	{"Arconada, Beatriz","Delgado, Patricia","Garcia, Angel"}	{"Non Zostera"}
1977236	Effects of houseboats on organisms of the La Parguera Reserve, Puerto Rico	2004	{"Hertler, H","Kreeger, DA","Spotila, J"}	{"Non Zostera"}
1977671	Meiofaunal production and energy transfer efficiency in a seagrass Posidonia oceanica bed in the western Mediterranean	2002	{"Danovaro, R","Gambi, C","Mirto, S"}	{"Non Zostera","No Stressor/Restoration"}
1976517	Separation and identification of the yellow carotenoids in Potamogeton crispus L.	2008	{"Ren, Dandan","Zhang, Shenghua"}	{"Non Seagrass"}
1973825	Lack of Impact of Posidonia oceanica Leaf Nutrient Enrichment on Sarpa salpa Herbivory: Additional Evidence for the Generalist Consumer Behavior of This Cornerstone Mediterranean Herbivore	2016	{"Cebrian, Just","Fernandez-Torquemada, Yolanda","Ferrero-Vicente, Luis","Heck, Kenneth L.","Luis Sanchez-Lizaso, Jose","Marco-Mendez, Candela","Scheffel, Whitney","Wessel, Caitlin"}	{"Non Zostera","No Restoration Mentioned"}
1975263	Modeling the species shift from Potamogeton malaianus Miq. to Potamogeton maackianus A. Bennett in the experiment pond	2012	{"Han, Hongjuan","Hu, Weiping"}	{"Non Seagrass"}
1975840	Feedback effects in a coastal canopy-forming submersed plant bed	2010	{"Gruber, Renee K.","Kemp, W. Michael"}	{"Non Seagrass"}
1976446	Ecological and physiological controls of species composition in green macroalgal blooms	2008	{"Buckingham, Lee","Fredrickson, Kerri","Haberlin, Karalon","Hotchkiss, Ruth","Nelson, Amorah V.","Nelson, Timothy A.","Ribarich, Heather","Simunds, Dejah J.","Van Alstyne, Kathryn L."}	{"Non Seagrass"}
1978816	CURRENT VELOCITY AND ITS EFFECT ON AQUATIC MACROPHYTES IN FLOWING WATERS	1991	{"BOTHWELL, ML","CHAMBERS, PA","HAMILTON, HR","PREPAS, EE"}	{"Non Seagrass"}
1975003	Effects of Posidonia Oceanica Beach-Cast on Germination, Growth and Nutrient Uptake of Coastal Dune Plants	2013	{"Acosta, Alicia","Del Vecchio, Silvia","Marba, Nuria","Traveset, Anna","Vignolo, Clara"}	{"Non Zostera"}
1979117	NITROGENASE ACTIVITY ASSOCIATED WITH HALODULE-WRIGHTII ROOTS	1982	{"HAYASAKA, SS","SMITH, GW"}	{"Non Zostera","No Restoration Mentioned"}
1978132	Effects on aquatic ecosystems	1998	{"Hader, DP","Kumar, HD","Smith, RC","Worrest, RC"}	{"Non Zostera"}
1973232	The Tropical Invasive Seagrass, Halophila stipulacea, Has a Superior Ability to Tolerate Dynamic Changes in Salinity Levels Compared to Its Freshwater Relative, Vallisneria americana	2018	{"Barak, Simon","Oscar, Michelle A.","Winters, Gidon"}	{"Non Zostera"}
1977991	Accumulation of seagrass beach cast along the Kenyan coast: a quantitative assessment	1999	{"Erftemeijer, PLA","Ochieng, CA"}	{"Non Zostera"}
1974243	The interactive effects of water flow and reproductive strategies on seed and seedling dispersal along the substrate in two sub-tropical seagrass species	2015	{"Booth, Dale M.","Darnell, Kelly M.","Dunton, Kenneth H.","Koch, Evamaria W."}	{"No Stressor/Restoration"}
1972956	Comparison of dinitrogen fixation rates in two subtropical seagrass communities	2019	{"Carlson-Perret, Natasha L.","Erler, Dirk, V","Eyre, Bradley D."}	{"No Stressor/Restoration"}
1977331	Photosynthetic characteristics of benthic microalgae and seagrass in Lake Illawarra, Australia	2004	{"Morrison, RJ","Qu, WC","Su, CW","West, RJ"}	{"Non Zostera","No Stressor/Restoration","No Restoration Mentioned"}
1978172	Recruitment of juvenile marine fishes to seagrass habitat in a temperate Australian estuary	1998	{"Hannan, JC","Williams, RJ"}	{"Non Seagrass"}
1977130	Relative abundance, age, growth, and fecundity of grubby Myoxocephalus aenaeus in Niantic River and Niantic Bay, Long Island Sound	2005	{"Burton, JA","Maynard, T","Roseman, EF","Tomichek, CA"}	{"Non Seagrass"}
1974001	Microbial associations With macrobiota in coastal ecosystems: patterns and implications for nitrogen cycling	2016	{"Altabet, Mark A.","Beman, J. Michael","Deegan, Linda A.","Lloret, Javier","Lyons, Meaghan K.","Moulton, Orissa M.","Nelson, James A.","Pfister, Catherine A."}	{"Non Zostera"}
1975672	Suitability of calcein as an in situ growth marker in burrowing bivalves	2011	{"Olff, Han","Piersma, Theunis","van Gils, Jan A.","van der Geest, Matthijs","van der Meer, Jaap"}	{"Non Seagrass"}
1974341	Regional movement patterns of a small-bodied shark revealed by stable-isotope analysis	2015	{"Fisk, A. T.","Heupel, M. R.","Logan, M.","Munroe, S. E. M.","Simpfendorfer, C. A."}	{"Non Seagrass"}
1976301	Prediction and validation of flow-dependent uptake of ammonium over a seagrass-hardbottom community in Florida Bay	2009	{"Cornelisen, Christopher D.","Thomas, Florence I. M."}	{"Non Zostera","No Restoration Mentioned"}
1974766	Spatial Structure of Seagrass Suggests That Size-Dependent Plant Traits Have a Strong Influence on the Distribution and Maintenance of Tropical Multispecies Meadows	2014	{"Holmes, Karen W.","Kendrick, Gary A.","Ooi, Jillian L. S.","Van Niel, Kimberly P."}	{"Non Zostera"}
1978278	Phytobenthic biomass in ''semiculture'' facilities of Strombus gigas, in Quintana Roo, Mexico	1997	{"OlivaRivera, JJ","deJesusNavarrete, A"}	{"Non Zostera"}
1976775	Feeding ecology of the grooved tiger shrimp Penaeus semisulcatus De Haan (Decapoda : Penaeidae) in inshore waters of Qatar, Arabian Gulf	2007	{"Al-Maslamani, I.","Jones, D. A.","Kennedy, H.","Le Vay, L."}	{"Non Zostera","No Stressor/Restoration","No Restoration Mentioned"}
1973976	Heat stress of two tropical seagrass species during low tides - impact on underwater net photosynthesis, dark respiration and diel in situ internal aeration	2016	{"Borum, Jens","Colmer, Timothy D.","Kendrick, Gary A.","Pedersen, Ole","Zavala-Perez, Andrea"}	{"Non Zostera"}
1976875	Effects of nutrients inputs from mobile bay on ruppia maritima in coastal Alabama	2006	{"McGovern, Tamara","Williams, Savannah Y."}	{"Non Zostera"}
1978501	SEASONAL NUTRIENT CYCLING IN POTAMOGETON PECTINATUS OF THE LOWER PROVO RIVER	1995	{"LYTLE, CM","SMITH, BN"}	{"Non Seagrass"}
1979210	CHARACTERIZATION OF HILL ACTIVITY OF A SUBMERSED AQUATIC ANGIOSPERM (SAGO PONDWEED)	1980	{"CHOUDHURI, MA","JANA, S"}	{"Non Seagrass"}
1974841	Ecological characteristics of plant species and associations along two Dinaric karstic rivers (Bosnia and Herzegovina, the Balkans)	2014	{"Caric, Marina","Dreskovic, Nusret","Glavic, Niksa","Jasprica, Nenad","Kapetanovic, Tatjana","Lasic, Andelka","Mitic, Bozena","Morovic, Mira"}	{"Non Seagrass"}
1978194	delta N-15 evidence for nitrogen fixation associated with macroalgae from a seagrass-mangrove coral reef system	1998	{"Cattaneo, A","Chandler, M","France, R","Holmquist, J"}	{"No Stressor/Restoration"}
1978710	Studies on littoral and sublittoral macrophytes around the Mauritius coast	1993	{"Jagtap, T. G."}	{"Non Zostera"}
1978294	Leaf-size dynamics for Zostera marina L in San Quintin Bay, Mexico: A theoretical study	1997	{"EchavarriaHeras, HA","IbarraObando, SE","SolanaArellano, ME"}	{"No Stressor/Restoration","No Restoration Mentioned"}
1978105	Effects of water-column enrichment on the production dynamics of three seagrass species and their epiphytic algae	1999	{"Millie, DF","Moore, AD","Sullivan, MJ","Wear, DJ"}	{"Non Zostera"}
1976360	How does burrowing by the isopod Limnoria agrostisa (Crustacea: Limnoriidae) affect the leaf canopy of the southern Australian seagrass Amphibolis griffithii?	2008	{"Brearley, Anne","Kendrick, Gary A.","Walker, Diana I."}	{"Non Zostera","No Restoration Mentioned"}
1973675	Interspecific differences in habitat selection of syngnathids in the Ria Formosa lagoon, Portugal	2017	{"Erzini, Karim","Mueller, Carolin"}	{"Non Seagrass","No Stressor/Restoration"}
1973245	Hypersalinity as a trigger of seagrass (Thalassia testudinum) die-off events in Florida Bay: Evidence based on shoot meristem O-2 and H2S dynamics	2018	{"Johnson, C. R.","Koch, M. S.","Madden, C. J.","Pedersen, O."}	{"Non Zostera"}
1978757	THE QUANTUM EFFICIENCY OF PHOTOSYNTHESIS IN MACROALGAE AND SUMBERGED ANGIOSPERMS	1992	{"FROSTCHRISTENSEN, H","SANDJENSEN, K"}	{"No Stressor/Restoration"}
1972464	The Use of Imagery and GIS Techniques to Evaluate and Compare Seagrass Dynamics across Multiple Spatial and Temporal Scales	2020	{"Bell, Susan S.","Kaufman, Kristen A."}	{"No Stressor/Restoration"}
1972493	Importance of various marine coastal habitats during the life cycle of Spratelloides delicatulus in Con Dao, the oldest MPA in Vietnam	2020	{"Durand, Jean-Dominique","Hoang, Duc Huy","Le, Minh Phong","Panfili, Jacques","Pham, Manh Hung","Vo, Bich Thao T."}	{"Non Seagrass","Coastal Habitat"}
1974877	Understanding the Nutritional Sources of Gastropods and Anomura from the Mangrove Forest of Weno Island, Micronesia.	2013	{"Ju, Se-Jong","Kim, Min-Seob","Ko, Ah-Ra"}	{"Non Seagrass"}
1978920	ROOTS VERSUS SHOOTS IN NUTRIENT-UPTAKE BY AQUATIC MACROPHYTES IN FLOWING WATERS	1989	{"BOTHWELL, ML","CHAMBERS, PA","HAMILTON, HR","PREPAS, EE"}	{"No Stressor/Restoration"}
1979007	SEAGRASS DISTRIBUTION AND ABUNDANCE IN EASTERN GULF OF MEXICO COASTAL WATERS	1986	{"BITTAKER, HF","IVERSON, RL"}	{"Non Zostera"}
1973723	Experimental assessment of Posidonia oceanica-associated gastropods grazing on an early-successional biofilm community: nutrient availability and species-specific effects	2017	{"Castejon-Silvo, Ines","Terrados, Jorge"}	{"Non Zostera","No Restoration Mentioned"}
1977366	The no-take research natural area of dry Tortugas National Park (Florida): Wishful thinking or responsible planning?	2004	{"BE Shipley, JB","Brock, RJ","Culhane, BF"}	{"Non Seagrass"}
1978210	Measures of juvenile fish habitat quality: Examples from a National Estuarine Research Reserve	1998	{"Able, KW","BE Benaka, LR"}	{"No Stressor/Restoration"}
1979016	THE INFLUENCE OF QUANTITATIVE AND QUALITATIVE ASPECTS OF HABITAT COMPLEXITY IN TROPICAL SEA-GRASS MEADOWS	1985	{"LEWIS, FG","STONER, AW"}	{"Non Zostera"}
1975326	Isolation and characterization of microsatellite markers for Zostera marina and their cross-species amplification in Zostera caespitosa	2012	{"Cui, Cuiju","Jiang, Xin","Peng, Jie","Wu, Ruina","Zhang, Linan","Zhao, Juping"}	{"No Stressor/Restoration"}
1976955	Island-specific responses of Bahamian benthic flora to environmental features	2006	{"Nero, Vanessa L.","Sealey, Kathleen Sullivan"}	{"Non Zostera"}
1973328	Wave Height Attenuation and Flow Resistance Due to Emergent or Near-Emergent Vegetation	2018	{"De Serio, Francesca","Defina, Andrea","Mossa, Michele","Peruzzo, Paolo"}	{"Non Seagrass"}
1978582	DIFFERENT NICHES OF THE HALOPHILA-STIPULACEA SEAGRASS BED HARBOR DISTINCT POPULATIONS OF NITROGEN-FIXING BACTERIA	1994	{"LIPKIN, Y","PEREG, LL","SAR, N"}	{"Non Zostera"}
1973679	Bottom-up and top-down controls on coral reef sponges: disentangling within-habitat and between-habitat processes	2017	{"Wulff, Janie"}	{"Non Seagrass"}
1974706	The role of overgrazing and anthropogenic disturbance in shaping spatial patterns of distribution of an invasive seaweed	2014	{"Balata, David","Benedetti-Cecchi, Lisandro","Bulleri, Fabio","Tamburello, Laura"}	{"Non Seagrass"}
1974806	Aragonite saturation states and nutrient fluxes in coral reef sediments in Biscayne National Park, FL, USA	2014	{"Halley, Robert","Lisle, John","Reich, Chris"}	{"Coastal Habitat"}
1979085	THE VEGETATION AND PHYTOGEOGRAPHY OF SABLE ISLAND NOVA-SCOTIA CANADA	1984	{"CATLING P M","FREEDMAN B","LUCAS Z"}	{"Non Seagrass"}
1977204	Nitrate in Coastal Waters	2005	{"Addiscott, T. M.","BA Addiscott, TM"}	{"Non Seagrass"}
1977868	Polyamine levels in the seagrass Cymodocea nodosa	2000	{"Garcia-Jimenez, P","Marian, FD","Robaina, RR"}	{"Non Zostera"}
1975010	Phylogenetic and functional diversity of nitrogen cycling microbes in coastal sediments	2013	{"Gong, Jun","Song, Yanjing","Zhang, Xiaoli"}	{"Non Seagrass","No Restoration Mentioned","Coastal Habitat"}
1975546	Use of riverine through reef habitat systems by dog snapper (Lutjanus jocu) in eastern Brazil	2011	{"Chaves, Eduardo M.","Francini-Filho, Ronaldo B.","Lindeman, Kenyon C.","Minte-Vera, Carolina V.","Moura, Rodrigo L."}	{"Non Seagrass"}
1974578	On experimentation, adaptation and evolution	2014	{"McDonald, Tein"}	{"Non Seagrass","Non Zostera","No Stressor/Restoration","No Restoration Mentioned"}
1975122	Spatial and temporal shifts in suitable habitat of juvenile southern flounder (Paralichthys lethostigma)	2013	{"Furey, Nathan B.","Rooker, Jay R."}	{"Non Seagrass"}
1975729	Seasonal variation in carbon sources of mesograzers and small predators in an eelgrass community: stable isotope and fatty acid analyses	2011	{"Brepohl, Daniela C.","Jaschinski, Sybill","Sommer, Ulrich"}	{"No Stressor/Restoration"}
1972524	Warming enhances carbon dioxide and methane fluxes from Red Sea seagrass (Halophila stipulacea) sediments	2020	{"Burkholz, Celina","Duarte, Carlos M.","Garcias-Bonet, Neus"}	{"Non Zostera"}
1972862	Multivariate analyses link macrophyte and water quality indicators to seagrass die-off in Florida Bay	2019	{"Durako, Michael J.","Fredley, Jennifer","Hall, Margaret O."}	{"Non Zostera"}
1975045	Variation in pigment content of Thalassia testudinum seedlings in response to changes in salinity and light	2013	{"Durako, Michael J.","Howarth, Jacqueline F."}	{"Non Zostera"}
1978775	GROWTH AND TEMPERATURE-INDUCED MORTALITY OF YOUNG-OF-THE-YEAR SUMMER FLOUNDER (PARALICHTHYS-DENTATUS) IN SOUTHERN NEW-JERSEY	1992	{"ABLE, KW","ROUNTREE, RA","SZEDLMAYER, ST"}	{"Non Seagrass"}
1973702	Trade-offs between data resolution, accuracy, and cost when choosing information to plan reserves for coral reef ecosystems	2017	{"Jupiter, Stacy D.","Klein, Carissa J.","Possingham, Hugh P.","Roelfsema, Chris","Tulloch, Ayesha I. T.","Tulloch, Vivitskaia J."}	{"Non Seagrass","Coastal Habitat"}
1973055	Reef-to-ridge ecological perspectives of high-energy storm events in northeast Australia	2019	{"Turton, Stephen M."}	{"Non Zostera"}
1978014	Benthic communities associated to Thalassia testudinum (Hydrocharitaceae) at three localities of Morrocoy National Park, Venezuela	1999	{"Bitter-Soto, R"}	{"Non Zostera"}
1975676	Spatial and temporal trends in yellow stingray abundance: evidence from diver surveys	2011	{"Lotze, Heike K.","Myers, Ransom A.","Pattengill-Semmens, Christy","Ward-Paige, Christine A."}	{"Non Seagrass","No Restoration Mentioned"}
1974092	OUT OF THE FRYING PAN INTO THE FIRE: IS PROTECTION HARMFUL TO SEA URCHINS HIDDEN IN SEAGRASS MEADOWS?	2016	{"Ceccherelli, G.","Da Silva, R. Pires","Farina, S.","Guala, I.","Magnani, L.","Oliva, S.","Piazzi, L."}	{"Non Zostera"}
1973006	Impact assessment of fish cages on coralligenous reefs through the use of the STAR sampling procedure	2019	{"Ceccherelli, Giulia","Cecchi, Enrico","Cinti, Maria Francesca","Piazzi, Luigi","Stipcich, Patrizia"}	{"Non Seagrass"}
1977281	Ammonium and nitrate uptake by leaves of the seagrass Thalassia testudinum: impact of hydrodynamic regime and epiphyte cover on uptake rates	2004	{"Cornelisen, CD","Thomas, FIM"}	{"Non Zostera"}
1975292	The effect of in situ shading on a Posidonia oceanica meadow situated within a fish farm induced moderately nutrient enriched environment	2012	{"Pikelj, Kristina","Puhr, Kristian"}	{"Non Zostera"}
1977242	The effects of dietary protein concentration on feeding and growth of small Lytechinus variegatus (Echinodermata : Echinoidea)	2004	{"Desmond, RA","Hammer, BW","Hammer, HS","Lawrence, AL","Lawrence, JM","Watts, SA"}	{"Non Seagrass"}
1974879	Interactions between seagrass ecosystem and the endangered marine mammal dugong.	2013	{"Fan Hang-qing","Qin Qiu-rong","Qiu Guang-long","Zhou Hao-lang"}	{"Non Zostera"}
1974473	Histo-anatomical leaf variations related to depth in Posidonia oceanica	2015	{"Innocenti, Anna M.","Nicastro, Silvia","Passalacqua, Nicodemo G."}	{"Non Zostera"}
1979037	MICROBIAL BIOMASS AND PRODUCTIVITY IN SEAGRASS BEDS	1985	{"BOON, PI","HANSEN, JA","HUNT, WG","MORIARTY, DJW","POINER, IR","POLLARD, PC","SKYRING, GW","WHITE, DC"}	{"No Stressor/Restoration"}
1977489	Cadmium accumulation and its phytotoxicity in Potamogeton pectinatus L. (Potamogetonaceae)	2003	{"Ali, MB","Gupta, DK","Pandey, N","Rai, UN","Tripathi, RD","Vajpayee, P"}	{"Non Seagrass"}
1977439	Effects of light and nutrient availability on the growth, allocation, carbon/nitrogen balance, phenolic chemistry, and resistance to herbivory of two freshwater macrophytes	2003	{"Cronin, G","Lodge, DM"}	{"Non Seagrass"}
1977588	Impacts of seagrass food webs on marine ecosystems: A need for a broader perspective	2002	{"Cinkovich, AM","Heck, KL","Valentine, JF"}	{"No Stressor/Restoration"}
1976317	Reduced performance of native infauna following recruitment to a habitat-forming invasive marine alga	2009	{"Doblin, Martina A.","Eyre, Bradley","Gribben, Paul E.","O'Connor, Wayne A.","Steinberg, Peter D.","Wright, Jeffrey T."}	{"Non Seagrass"}
1978758	VARIABILITY IN GROWTH-RATES OF JUVENILE FISHES IN DIFFERENT ESTUARINE HABITATS	1992	{"SOGARD, SM"}	{"No Stressor/Restoration"}
1975336	Bioaccessibility of Trace Metals in Sediment, Macroalga and Antifouling Paint to the Wild Mute Swan, Cygnus olor	2012	{"Hambling, Jessica","Turner, Andrew"}	{"Non Seagrass"}
1973212	Reproducible multi-parameter acoustic detection of seasonal drift macroalgae in the Indian River Lagoon, Florida	2018	{"Foster, G.","Foster, K. A.","Morris, L. J.","Riegl, B. M."}	{"Non Seagrass"}
1974848	Ecology of Seagrass Communities	2014	{"BE Bertness, MD","Bruno, JF","Duffy, J. Emmett","Hughes, A. Randall","Moksnes, Per-Olav","Silliman, BR","Stachowicz, JJ"}	{"No Stressor/Restoration"}
1973415	Chelonia mydas (Green Sea Turtle) forage at Higher Rates on Native Caribbean Seagrasses Despite Higher Coverage of Non-native Halophila stipulacea	2018	{"Keller, Danielle A.","Morton, Joseph P.","Shaver, Elizabeth C.","Silliman, Brian R."}	{"Non Zostera"}
1978034	Seasonal and long-term trends in the water quality of Florida Bay (1989-1997)	1999	{"Boyer, JN","Fourqurean, JW","Jones, RD"}	{"Non Zostera"}
1976274	Great Barrier Reef: Biology, Environment and Management	2009	NA	{"Non Seagrass"}
1974014	Influence of Manatees' Diving on Their Risk of Collision with Watercraft	2016	{"Barlas, Margaret E.","Deutsch, Charles J.","Edwards, Holly H.","Koslovsky, Stacie M.","Martin, Julien","Muller, Robert G.","Smith, Alexander J."}	{"Non Seagrass"}
1976848	Characterization of ammonia oxidizing bacteria associated with weeds in a Japanese paddy field using amoA gene fragments	2006	{"Asakawa, Susumu","Bowatte, Saman","Ishihara, Rie","Kimura, Makoto"}	{"Non Seagrass"}
1973273	Mud-entrained macroalgae utilise porewater and overlying water column nutrients to grow in a eutrophic intertidal estuary	2018	{"Robertson, Ben P.","Savage, Candida"}	{"Non Seagrass"}
1973429	Assessing resource use patterns of Mediterranean loggerhead sea turtles Caretta caretta (Linnaeus, 1758) through stable isotope analysis	2018	{"Blasi, M. F.","Careddu, G.","Gelippi, M.","Insacco, G.","Polunin, N. V. C.","Tomassini, L."}	{"Non Seagrass"}
2100240	Interception device for mitigating current capture of nutrients and stabilizing seabed, has grille whose bottom portion is integrally formed with fixing element that is engaged by sand gravity	NA	{"CHEN S","LI Y","SHEN J","WU Z"}	{"Non Seagrass"}
1974746	Effects of two antagonistic ecosystem engineers on infaunal diversity	2014	{"Alcazar, P.","Brun, F. G.","Gonzalez-Ortiz, V.","Perez-Llorens, J. L.","Vergara, J. J."}	{"No Stressor/Restoration"}
1975809	Connectivity of Estuaries	2011	{"BE Wolanski, E","Elsdon, T. S.","Gillanders, B. M.","McLusky, D","Roughan, M."}	{"Non Seagrass"}
1976501	A survey of algal epiphytes from Vallisneria americana Michx. (Hydrocharitaceae) in the lower St. Johns River, Florida	2008	{"Casamatta, Dale A.","Dobberfuhl, Dean R.","Dunn, Angela E."}	{"Non Seagrass"}
1974054	Relationships between trace elements in Posidonia oceanica shoots and in sediment fractions along Latium coasts (northwestern Mediterranean Sea)	2016	{"Bravo, I.","Cerfolli, F.","Focaracci, F.","Papetti, P."}	{"Non Zostera"}
1978822	SEAGRASS DEPTH LIMITS	1991	{"DUARTE, CM"}	{"Non Zostera","No Stressor/Restoration","No Restoration Mentioned","Coastal Habitat"}
1978368	Biogeochemical box modelling at small scale - Application to the inorganic carbon cycle in the Bay of Calvi	1996	{"Frankignoulle, M","Norro, A"}	{"Non Zostera"}
1977279	Community level engineering effects of Triglochin maritima (seaside arrowgrass) in a salt marsh in northern New England, USA	2004	{"Bertness, MD","Crain, CM","Fogel, BN"}	{"Non Seagrass","Non Zostera"}
1975530	Native and exotic submerged aquatic vegetation provide different nutritional and refuge values for macroinvertebrates	2011	{"Armitage, Anna R.","Ho, Chuan-Kai","Valinoti, Cara E."}	{"Non Seagrass"}
1976132	In situ dissolved organic carbon (DOC) release by submerged macrophyte-epiphyte communities in southern Quebec lakes	2009	{"Demarty, M.","Prairie, Y. T."}	{"Non Seagrass"}
1979079	EFFECTS OF A DECOMPOSING DRIFT ALGAL MAT ON SEDIMENT PORE WATER NUTRIENT CONCENTRATIONS IN A FLORIDA SEAGRASS BED	1984	{"MONTGOMERY, JR","ZIMMERMANN, CF"}	{"Non Zostera"}
1977493	Role of macroalgal biomass and clam fishing on spatial and temporal changes in N and P sedimentary pools in the central part of the Venice lagoon	2003	{"Ceoldo, S","Facca, C","Ghetti, PF","Sfriso, A","Silvestri, S"}	{"Non Zostera"}
1976772	A decline in the abundance and condition of a native bivalve associated with Caulerpa taxifolia invasion	2007	{"Gribben, Paul E.","McKenzie, Louise A.","Wright, Jeffrey T."}	{"Non Seagrass"}
1974315	The modulation of leaf metabolism plays a role in salt tolerance of Cymodocea nodosa exposed to hypersaline stress in mesocosms	2015	{"Bemardeau-Esteller, Jaime","Femandez, Juan M. R.","Marin-Guirao, Lazaro","Mazzuca, Silvia","Piro, Amalia","Sandoval-Gil, Jose M.","Serra, Ilia A.","Spadafora, Antonia"}	{"Non Zostera"}
1977562	Ecology and restoration techniques for Sargassum beds in the Seto Inland Sea, Japan	2003	{"Iseki, K","Terawaki, T","Uchimura, M","Yoshida, G","Yoshikawa, K"}	{"Non Seagrass"}
1976698	Field measurements of inorganic nitrogen uptake by epiflora components of the seagrass Posidonia oceanica (Monocotyledons, Posidoniaceae)	2007	{"Bouquegneau, Jean-Marie","Demoulin, Vincent","Gobert, Sylvie","Jacquemart, Julien","Lepoint, Gilles"}	{"Non Zostera"}
1973221	Control of net community production by microbial community respiration at Station ALOHA	2018	{"Bidigare, Robert R.","Church, Matthew J.","Juranek, Laurie W.","Martinez-Garcia, Sandra","Nicholson, David P.","Viviani, Donn A.","Wilson, Samuel T.","del Valle, Daniela A."}	{"Non Seagrass","No Stressor/Restoration"}
1976120	Cryptic dietary components reduce dietary overlap among sympatric butterflyfishes (Chaetodontidae)	2009	{"Nagelkerken, I.","Nugues, M. M.","Pratchett, M. S.","Wartenbergh, S. L. J.","van der Velde, G."}	{"Non Seagrass"}
1977321	Dispersive behaviors of black drum and red drum: Is otolith Sr : Ca a reliable indicator of salinity history?	2004	{"Kraus, RT","Rooker, JR","Secor, DH"}	{"Non Seagrass"}
1978918	EFFECTS OF PARTIAL DEFOLIATION ON REMAINING INTACT LEAVES IN THE SEAGRASS THALASSIA-TESTUDINUM BANKS EX KONIG	1989	{"DAWES, CJ","TOMASKO, DA"}	{"Non Zostera"}
1975037	Detrital diversity influences estuarine ecosystem performance	2013	{"Bishop, Melanie J.","Kelaher, Brendan P.","Potts, Jaimie","Scanes, Peter","Skilbeck, Greg"}	{"Non Seagrass"}
1977678	Parrotfish grazing on turtlegrass Thalassia testudinum: evidence for the importance of seagrass consumption in food web dynamics of the Florida Keys National Marine Sanctuary	2002	{"Heck, KL","Kirsch, KD","Valentine, JF"}	{"Non Zostera"}
1978900	A COMPARATIVE-STUDY OF HABITAT USE BY YOUNG-OF-THE-YEAR, SUBADULT, AND ADULT ROCKFISHES ON 4 HABITAT TYPES IN CENTRAL PUGET SOUND	1990	{"MATTHEWS, KR"}	{"No Stressor/Restoration"}
1977765	Surficial sediments of the Great Australian Bight: Facies dynamics and oceanography on a vast cool-water carbonate shelf	2001	{"Bone, Y","Collins, LB","James, NP","Kyser, TK"}	{"Non Seagrass","Non Zostera","No Stressor/Restoration","No Restoration Mentioned"}
1975757	Habitat-specific distinctions in estuarine denitrification affect both ecosystem function and services	2011	{"Piehler, M. F.","Smyth, A. R."}	{"Non Seagrass"}
1974205	Effects of ocean acidification on Posidonia oceanica epiphytic community and shoot productivity	2015	{"Alliouane, Samir","Cox, T. Erin","Delille, Jeremy","Diaz-Castaneda, Victoria","Gattuso, Jean-Pierre","Gazeau, Frederic","Schenone, Stefano"}	{"Non Zostera","Coastal Habitat"}
1979302	DETRITUS FORMATION FROM EELGRASS (ZOSTERA-MARINA L) - RELATIVE EFFECTS OF FRAGMENTATION, LEACHING, AND DECAY	1975	{"HARRISON, PG","MANN, KH"}	{"No Stressor/Restoration"}
1977144	A temporal investigation of grazer dynamics, nutrients, seagrass leaf productivity, and epiphyte standing stock	2005	{"Frankovich, TA","Zieman, JC"}	{"Non Zostera","No Stressor/Restoration","No Restoration Mentioned"}
1977543	Nekton use of different habitat types in seagrass beds of Lower Laguna Madre, Texas	2003	{"Minello, TJ","Sheridan, P"}	{"Non Zostera"}
1974589	Interdependency of tropical marine ecosystems in response to climate change	2014	{"Baldock, Tom","Brown, Christopher J.","Callaghan, David P.","Golshani, Aliasghar","Hamylton, Sarah","Hoegh-Guldberg, Ove","Leon, Javier X.","Lovelock, Catherine E.","Mumby, Peter J.","Phinn, Stuart R.","Roelfsema, Chris M.","Saunders, Megan I.","Woodroffe, Colin D."}	{"Non Zostera"}
1973717	Small-scale variability in geomorphological settings influences mangrove-derived organic matter export in a tropical bay	2017	{"Kairo, James","Mazzola, Antonio","Signa, Geraldina","Vizzini, Salvatrice"}	{"Non Seagrass"}
1973160	Unnatural hypoxic regimes	2018	{"Dale, Virginia H.","Jager, Henriette I.","Novello, Rebecca C.","Rose, Kenneth A.","Villnas, Anna"}	{"Non Seagrass"}
1977716	Bivalve enhancement and restoration strategies in Florida, USA	2001	{"Arnold, WS"}	{"Non Seagrass"}
1978841	THE EFFECTS OF HURRICANE HUGO ON THE COASTAL ENVIRONMENT OF GUADELOUPE ISLAND (FWI)	1991	{"BOUCHON, C","BOUCHONNAVARO, Y","IMBERT, D","LOUIS, M"}	{"Non Zostera"}
1976711	Photosynthesis in Codium fragile (Chlorophyta) from a Nova Scotia estuary: responses to desiccation and hyposalinity	2007	{"Garbary, David J.","Kim, Kwang Young"}	{"Non Seagrass"}
1976052	Migration of green turtles (Chelonia mydas) from Australasian feeding grounds inferred from genetic analyses	2010	{"Broderick, Damien","Dethmers, Kiki E. M.","FitzSimmons, Nancy N.","Jensen, Michael P.","Limpus, Colin J.","Moritz, Craig"}	{"No Stressor/Restoration"}
1977103	Effects of salinity on leaf growth and survival of the Mediterranean seagrass Posidonia oceanica (L.) Delile	2005	{"Fernandez-Torquemada, Y","Sanchez-Lizaso, JL"}	{"Non Zostera","No Restoration Mentioned"}
1976912	Sulfur cycling and sulfide intrusion in mixed Southeast Asian tropical seagrass meadows	2006	{"Holmer, M","Ikejima, K","Pedersen, O"}	{"Non Zostera"}
1978606	DIFFERENCES IN NUTRIENT CONCENTRATIONS AND RESOURCES BETWEEN SEAGRASS COMMUNITIES ON CARBONATE AND TERRIGENOUS SEDIMENTS IN SOUTH SULAWESI, INDONESIA	1994	{"ERFTEMEIJER, PLA"}	{"Non Zostera"}
1976176	ROLE OF SURFACE WOUNDS AND BROWN ALGAL EPIPHYTES IN THE COLONIZATION OF ASCOPHYLLUM NODOSUM (PHAEOPHYCEAE) FRONDS BY VERTEBRATA LANOSA (RHODOPHYTA)	2009	{"Longtin, Caroline M.","Scrosati, Ricardo A."}	{"Non Seagrass","Non Zostera"}
1975868	Assessment of Coastal Bio-resources of the Palk Bay, India, using IRS-LISS-III data	2010	{"Astalakshmi, S.","Kannan, L.","Sridhar, R.","Thangaradjou, T."}	{"Non Zostera"}
1972782	Beyond the reef: The widespread use of non-reef habitats by coral reef fishes	2019	{"Andrefouet, Serge","Bonin, Mary C.","Cumming, Graeme S.","Duce, Stephanie","Hoey, Andrew S.","Sambrook, Katie"}	{"No Stressor/Restoration"}
1979165	GROWTH OF THE RED SEA BREAM PAGRUS-MAJOR IN YOUNG STAGES IN YUYA BAY THE JAPAN SEA	1981	{"KOJIMA K"}	{"Non Seagrass"}
1978508	EFFECTS OF LIGHT AND TEMPERATURE ON THE PHOTOSYNTHESIS OF TEMPERATE MEADOW-FORMING SEAGRASSES IN WESTERN-AUSTRALIA	1995	{"CARY, JL","MASINI, RJ","MCCOMB, AJ","SIMPSON, CJ"}	{"Non Zostera"}
1972682	Submarine groundwater discharge and associated nutrient fluxes to Discovery Bay, Jamaica	2019	{"Gordon-Smith, Debbie-Ann D. S.","Greenaway, Anthony M."}	{"Non Seagrass"}
1976932	Seed bank, biomass, and productivity of Halophila decipiens, a deep water seagrass on the west Florida continental shelf	2006	{"Fonseca, MS","Hammerstrom, KK","Kenworthy, WJ","Whitfield, PE"}	{"Non Zostera"}
1977710	Arsenic and phosphorus in seagrass leaves from the Gulf of Mexico	2001	{"Cai, Y","Fourqurean, JW"}	{"Non Zostera"}
1978065	Preliminary evidence on the interdependent effect of currents and porewater geochemistry on Thalassia testudinum Banks ex Konig seedlings	1999	{"Koch, EW"}	{"Non Zostera"}
1974714	Assessment of the abiotic and biotic effects of sodium metabisulphite pulses discharged from desalination plant chemical treatments on seagrass (Cymodocea nodosa) habitats in the Canary Islands	2014	{"Gonzalez, J. C.","Gonzalez, N.","Louzara, G.","Marin-Guirao, L.","Mendoza, H.","Portillo, E.","Quesada, J.","Roque, F.","Ruiz de la Rosa, M.","Ruiz, J. M."}	{"Non Zostera"}
1975371	Effects of Potamogeton crispus Growth on Concentrations of Different Species of Phosphorus in Interstitial Water of Sediments	2012	{"Song Kang","Wang Guo-xiang","Wang Wen-lin","Zhou Bei-bei"}	{"Non Seagrass"}
1978334	Photosynthetic plasticity in Potamogeton pectinatus L from Argentina: Strategies to survive adverse light conditions	1996	{"Drovandi, AA","Hootsmans, MJM","Perez, NS","Wiegman, F"}	{"Non Seagrass"}
1973916	Non-native seagrass Halophila stipulacea forms dense mats under eutrophic conditions in the Caribbean	2016	{"Bouma, T. J.","Govers, L. L.","Leuven, R. S. E. W.","van Katwijk, M. M.","van Tussenbroek, B. I.","van der Heide, T."}	{"Non Zostera"}
1977869	Effects of water velocity and canopy morphology on ammonium uptake by seagrass communities	2000	{"Cornelisen, CD","Thomas, FIM","Zande, JM"}	{"Non Zostera","No Restoration Mentioned"}
1978292	The influence of herbivores on Posidonia oceanica epiphytes	1997	{"Alcoverro, T","Duarte, CM","Romero, J"}	{"Non Zostera"}
1973085	Bio-Buffering to Combat Ocean Acidification?	2018	{"Datta, Rupali","Sarkar, Dibyendu"}	{"Non Zostera"}
1975090	Hooked and tubular coralline algae indicate seagrass beds associated to Mediterranean Messinian reefs (Poniente Basin, Almeria, SE Spain)	2013	{"Aguirre, Julio","Braga, Juan C.","Sola, Fernando"}	{"Non Zostera","No Stressor/Restoration","No Restoration Mentioned"}
1975830	Nutrient enrichment in tropical wetlands: shifts from autotrophic to heterotrophic nitrogen fixation	2010	{"Pivnickova, Barbora","Rejmankova, Eliska","Santruckova, Hana","Snyder, Jenise M."}	{"Non Seagrass"}
1975876	Sedimented cyanobacterial detritus as a source of nutrient for submerged macrophytes (Vallisneria spiralis and Elodea nuttallii): An isotope labeling experiment using N-15	2010	{"Li, Kuanyi","Liu, Zhengwen","Middelburg, Jack J.","Zhang, Leiyan"}	{"Non Seagrass"}
1977544	Carbon sources for benthic animal community in Aki Nada speculated on the basis of carbon and nitrogen stable isotope ratios.	2003	{"Hoshika, Akira","Mishima, Yasufumi","Takai, Noriyuki","Yoshihara, Kiyoshi"}	{"Non Seagrass"}
1974572	The effect of herbivores on genotypic diversity in a clonal aquatic plant	2014	{"Hidding, Bert","Klaassen, Marcel","Meirmans, Patrick G.","Nolet, Bart A.","Ouborg, N. J. (Joop)","Wagemaker, C. A. M. (Niels)","de Boer, Thijs"}	{"Non Seagrass"}
1977851	The effects of dietary protein concentration on growth of juveniles of the sea urchin Lytechinus variegatus.	2000	{"Hammer, HS","Lawrence, AL","Lawrence, JM","Wallace, BD","Watts, SA"}	{"Non Seagrass"}
1974200	Influence of Different Bryophyte Carpets on Vascular Plant Establishment Around Pools in Restored Peatlands	2015	{"Hugron, Sandrine","Laberge, Virginie","Poulin, Monique","Rochefort, Line"}	{"Non Seagrass"}
1977774	Submersed macrophyte effects on nutrient exchanges in riverine sediments	2001	{"Findlay, S","Finn, M","Fischer, D","Wigand, C"}	{"Non Seagrass"}
1976728	Effect of native and invasive cordgrass on Macoma petalum density, growth, and isotopic signatures	2007	{"Brusati, Elizabeth D.","Grosholz, Edwin D."}	{"Non Seagrass"}
1972495	Little giants: a rapidly invading seagrass alters ecosystem functioning relative to native foundation species	2020	{"Chiquillo, Kelcie L.","Cross, Candice","Fong, Peggy","Kelley, Thomas","Muthukrishnan, Ranjan","Toline, C. Anna","Willette, Demian A.","Zweng, Regina"}	{"Non Zostera","No Restoration Mentioned"}
1978948	NITRATE REDUCTASE-ACTIVITY IN ZOSTERA-MARINA	1988	{"PREGNALL, AM","ROTH, NC"}	{"No Stressor/Restoration"}
1976860	Sediment analysis evidences two different depositional phenomena influencing seagrass distribution in the Gulf of Oristano (Sardinia, western Mediterranean)	2006	{"Baroli, Maura","Cancemi, Gianluigi","De Falco, Giovanni","Murru, Ester","Piergallini, Giuseppe"}	{"Non Zostera"}
1975635	MICROSATELLITE PRIMERS FOR VULNERABLE SEAGRASS HALOPHILA BECCARII (HYDROCHARITACEAE)	2011	{"Jiang, Kai","Shi, Yi-Su","Xu, Na-Na","Zhang, Jian"}	{"Non Zostera"}
1975349	Molecular and morphological variation of the red alga Spyridia filamentosa (Ceramiales, Rhodophyta) in the Hawaiian Archipelago	2012	{"Conklin, Kimberly Y.","Sherwood, Alison R."}	{"Non Seagrass"}
1975534	Reducing Meadow Damage in Determining the Leaf Plastochrone Intervals (LPI) of Enhalus acoroides (L. f) Royle and Increasing Statistical Power in Assessing Site-Scale LPI Variability	2011	{"Rollon, Rene N.","de Venecia, Mary Bernadette B."}	{"Non Zostera"}
1975256	Posidonia-based Compost as a Peat Substitute for Lettuce Transplant Production	2012	{"Abdelrahman, Hamada M.","Cocozza, Claudio","Miano, Teodoro","Mininni, Carlo","Montesano, Francesco","Parente, Angelo","Santamaria, Pietro"}	{"Non Zostera"}
1977513	Settlement and distribution of age-0 juvenile cod, Gadus morhua and G-ogac, following a large-scale habitat manipulation	2003	{"Brown, JA","Gregory, RS","Laurel, BJ"}	{"Non Seagrass"}
1974681	Cleaning solution used for cleaning seagoing vessel, comprises phosphoric acid, sodium dodecylbenzenesulfonate, amidosulfonic acid, akylphenolpolyoxyethylene ether and water in preset mass ratio	NA	{"JIANG T"}	{"Non Seagrass"}
1978427	Nearshore fish community of the Port river Barker inlet estuary, south Australia .1. Effect of thermal effluent on the fish community structure, and distribution and growth of economically important fish species	1996	{"Baker, JL","Edyvane, K","Jones, GK","Wright, GJ"}	{"Non Seagrass"}
1973941	Congruence of intraspecific variability in leaf traits for two co-occurring estuarine angiosperms	2016	{"Ainley, Lara B.","Bishop, Melanie J.","Verges, Adriana"}	{"No Stressor/Restoration","Coastal Habitat"}
1975083	Sources, transformation and fate of particulate amino acids and hexosamines under varying hydrological regimes in the tropical Wenchang/Wenjiao Rivers and Estuary, Hainan, China	2013	{"Bao, Hongyan","Herbeck, Lucia S.","Jennerjahn, Tim","Li, Min","Unger, Daniela","Wu, Ying","Zhang, Jing"}	{"Non Seagrass","Non Zostera"}
1974418	Contrasting submergence tolerance in two species of stem-succulent halophytes is not determined by differences in stem internal oxygen dynamics	2015	{"Colmer, Timothy D.","Konnerup, Dennis","Moir-Barnetson, Louis","Pedersen, Ole","Veneklaas, Erik J."}	{"Non Seagrass"}
1975892	Mediterranean warming triggers seagrass (Posidonia oceanica) shoot mortality	2010	{"Duarte, Carlos M.","Marba, Nuria"}	{"Non Zostera"}
1978086	Light-induced photoinhibitory stress responses of laboratory-cultured Halophila ovalis	1999	{"Ralph, PJ"}	{"Non Zostera"}
1978955	ECOLOGY AND GROWTH OF POSTLARVAL AND JUVENILE LOBSTER, HOMARUS-AMERICANUS, OFF ILES-DE-LA-MADELEINE (QUEBEC)	1987	{"HUDON, C"}	{"Non Seagrass"}
1974296	Aragonite saturation states and nutrient fluxes in coral reef sediments in Biscayne National Park, FL, USA (vol 509, pg 71, 2014)	2015	{"Halley, Robert","Lisle, John","Reich, Chris"}	{"Non Seagrass"}
1975582	Herbivory in omnivorous fishes: effect of plant secondary metabolites and prey stoichiometry	2011	{"Bakker, Elisabeth S.","Dorenbosch, Martijn"}	{"No Stressor/Restoration"}
1976084	A Land-Based Thalassia testudinum Nursery Near Tampa Bay, Florida	2009	{"Dawes, Clinton J.","Miads, Michali"}	{"Non Zostera"}
1976713	Spatial and temporal variation in the elemental and stable isotopic content of the seagrasses Posidonia oceanica and Cymodocea nodosa from the Illes Balears, Spain	2007	{"Diaz-Almela, E.","Duarte, C. M.","Fourqurean, J. W.","Marba, N.","Ruiz-Halpern, S."}	{"Non Zostera"}
1977020	The Dugong, Dugong dugon, in Egyptian waters: distribution, relative abundance and threats	2006	{"Fouda, Moustafa","Gheny, Mohamed A.","Hanafy, Mahmoud","Rouphael, Anthony B.","Salam, Ali"}	{"Non Seagrass"}
1972522	Marine Aquaculture Impacts on Marine Biota in Oligotrophic Environments of the Mediterranean Sea - A Review	2020	{"Grubisic, Leon","Katavic, Ivan","Ticina, Vjekoslav"}	{"Non Seagrass"}
1973492	Shifts in coastal fish communities: Is eutrophication always beneficial for sticklebacks?	2017	{"Bostrom, Christoffer","Gagnon, Karine","Grafnings, Max"}	{"Non Seagrass","Non Zostera"}
1972787	Life history of the deep-water persimmon eelpout (Eucryphycus californicus, family: Zoarcidae), and its use of drift vegetation as an ecological subsidy	2019	{"Cailliet, Gregor M.","Kliever, Richard G.","Zuercher, Rachel"}	{"Non Seagrass"}
1973020	The origin of the suspended particulate matter in the seagrass meadow of tropical waters, an evidence of the stable isotope signatures	2019	{Afdal,"Wahyudi, A'an Johan"}	{"Non Zostera"}
1978012	Productivity and biomass of the seagrass Thalassia testudinum along a gradient of freshwater influence in Charlotte Harbor, Florida	1999	{"Hall, MO","Tomasko, DA"}	{"Non Zostera"}
1973875	Abundance and Diversity of Crypto- and Necto-BenthicCoastal Fish Are Higher in Marine Forests than in Structurally Less Complex Macroalgal Assemblages	2016	{"Arceo, Hazel","Basthard-Bogain, SolSne","Bianchimani, Olivier","Cheminee, Adrien","Cottalorda, Jean-Michel","Di Franco, Antonio","Francour, Patrice","Guidetti, Paolo","Lejeune, Pierre","Mangialajo, Luisa","Moranta, Joan","Thiriet, Pierre D."}	{"Non Seagrass","Non Zostera"}
1974790	Density, age structure, and length of queen conch (Strombus gigas) in shallow-water aggregations in the Sapodilla Cayes Marine Reserve, Belize	2014	{"Cigliano, John A.","Kliman, Richard M."}	{"Non Seagrass"}
1973791	Seasonal and environmental influences on recruitment patterns and habitat usage among resident and transient fishes in a World Heritage Site subtropical estuary	2017	{"Broadhurst, M. K.","Gray, C. A.","Nagelkerken, I.","Pichler, H. A.","Spach, H. L."}	{"Non Seagrass","Non Zostera"}
1976406	Variation of structural and functional metrics in macrophyte communities within two habitats of eastern Mediterranean coastal lagoons: natural versus human effects	2008	{"Nakou, K.","Orfanidis, S.","Pinna, M.","Sabetta, L.","Stamatis, N."}	{"Non Seagrass","Non Zostera","No Stressor/Restoration","No Restoration Mentioned"}
1975620	Hydrilla verticillata (Hydrocharitaceae), a recent invader threatening Brazil's freshwater environments: a review of the extent of the problem	2011	{"Sousa, W. T. Z."}	{"Non Seagrass"}
2545935	CSIRO Environmental Modelling Suite (EMS): scientific description of the optical and biogeochemical models (vB3p0)	2020	{"Adams, Matthew P.","Andrewartha, John","Baird, Mark E.","Cherukuru, Nagur","Gustafsson, Malin","Hadley, Scott","Harrison, Daniel","Herzfeld, Mike","Jones, Emlyn","Laiolo, Leonardo","Langlais, Clothilde","Margvelashvili, Nugzar","Mongin, Mathieu","Parslow, John","Ralph, Peter J.","Rizwi, Farhan","Robson, Barbara","Rosebrock, Uwe","Schroeder, Thomas","Skerratt, Jennifer","Soja-Wozniak, Monika","S…	{"No Stressor/Restoration"}
1973206	You are what you eat: Examining the effects of provisioning tourism on shark diets	2018	{"Abrantes, Katya G.","Barnett, Adam","Brunnschweiler, Juerg M."}	{"Non Seagrass"}
1977197	In the other 90%: phytoplankton responses to enhanced nutrient availability in the Great Barrier Reef Lagoon	2005	{"Brodie, J","Furnas, M","Mitchell, A","Skuza, M"}	{"Non Zostera"}
1972794	Population dynamics of Pinfish in the eastern Gulf of Mexico (1998-2016)	2019	{"Chacin, Dinorah H.","Faletti, Meaghan E.","MacDonald, Timothy C.","Peake, Jonathan A.","Stallings, Christopher D."}	{"Non Seagrass"}
1978388	Effects of macrophyte growth forms on invertebrate communities in saline lakes of the Wyoming High Plains	1996	{"Lovvorn, JR","Wollheim, WM"}	{"Non Seagrass","Non Zostera","No Stressor/Restoration","No Restoration Mentioned","Coastal Habitat"}
1978321	Effects of herbicides on two submersed aquatic macrophytes, Potamogeton pectinatus L and Myriophyllum sibiricum Komarov, in a prairie wetland	1997	{"Forsyth, DJ","Martin, PA","Shaw, GG"}	{"Non Seagrass"}
1974645	Factors Influencing Behavior and Success of Foraging Reddish Egrets (Egretta rufescens)	2014	{"Ballard, Bart M.","Bates, Elizabeth M."}	{"Non Seagrass","Non Zostera"}
1975779	Evaluation of Antioxidant and Nitrite Scavenging Activity of Seaweed Extracts	2011	{Í∂åÍ∏∞ÏÑù,ÏÜêÌò∏Ïö©,ÏïàÏÑ†ÎØ∏,ÌôçÏö©Í∏∞}	{"No Stressor/Restoration"}
1976305	Movement of gray snapper Lutjanus griseus among subtropical seagrass, mangrove, and coral reef habitats	2009	{"Kieckbusch, David","Luo, Jiangang","Serafy, Joseph E.","Sponaugle, Su","Teare, Paul B."}	{"No Stressor/Restoration"}
1977188	Proximity and size of neighbouring habitat affects invertebrate diversity	2005	{"Connell, SD","Gillanders, BM","Russell, BD"}	{"Non Seagrass"}
1976046	Newly discovered seagrass beds in the coastal seas of Guangdong Province	2010	{"Huang Xiao-ping","Jiang Zhi-jian","Li Lei","Shi Zhen","Wang Fei","Ye Feng","Zhang Jing-ping"}	{"No Stressor/Restoration","Coastal Habitat"}
1975062	Avian communities in Spartina maritima restored and non-restored salt marshes	2013	{"Castillo, Jesus M.","Curado, Guillermo","Figueroa, Enrique","Sanchez, Marta I."}	{"Non Seagrass"}
2545979	Variation in reproductive effort, genetic diversity and mating systems across Posidonia australis seagrass meadows in Western Australia	2020	{"Anthony, Janet M.","Breed, Martin F.","Edgeloe, Jane M.","Kendrick, Gary A.","Sinclair, Elizabeth A.","Statton, John"}	{"Non Zostera"}
1974176	Changes in the water quality characteristics during a macroalgal bloom in a coastal lagoon	2015	{"McArthur, Lynne","O'Neill, Karen","Schreider, Maria","Schreider, Sergei"}	{"Non Seagrass"}
1976348	Effect of Type of Feed, Stocking Density and Grow-out site on Gonad Index, Growth and Survivorship of Cultured Sea Urchin (Tripneustes gratilla)	2008	{"Bangi, Helen Grace P.","Juinio-Menez, Marie Antonette","Malay, Maria Celia D."}	{"Non Seagrass"}
1974526	Atlantic Cod (Gadus morhua) benefits from the availability of seagrass (Zostera marina) nursery habitat	2014	{"Lilley, Richard J.","Unsworth, Richard K. F."}	{"No Stressor/Restoration","No Restoration Mentioned"}
1977803	Photosynthetic response of Amphibolis antarctica and Posidonia australis to temperature and desiccation using chlorophyll fluorescence	2001	{"Cheshire, AC","Seddon, S"}	{"Non Zostera"}
1973819	Niche Differentiation and Prey Selectivity among Common Bottlenose Dolphins (Tursiops truncatus) Sighted in St. George Sound, Gulf of Mexico	2017	{"Balmer, Brian C.","Chanton, Jeffrey P.","Nelson, James A.","Nowacek, Douglas P.","Tyson, Reny B.","Wilson, Rachel M."}	{"Non Seagrass"}
1972451	Ecophysiological and cellular stress responses in the cosmopolitan brown macroalga Ectocarpus as biomonitoring tools for assessing desalination brine impacts	2020	{"Carratala, Adoracion","Celis-Pla, Paula S. M.","Garcia-Bartolomei, Enzo","Lopez-Marras, Americo","Luis Sanchez-Lizaso, Jose","Munoz, Pamela","Orrego, Rodrigo","Rodriguez-Rojas, Fernanda","Saez, Claudio A.","Valenzuela, Fernando"}	{"Non Seagrass","Non Zostera","No Restoration Mentioned"}
1975412	Spectral response of the coral rubble, living corals and dead corals; study case on the Spermonde archipelago, Indonesia	2012	{"Akbar, M. A. S.","Arafat, Gulam","BE Frouin, RJ","Ebuchi, N","Komatsu, Teruhisa","Nurdin, Nurjannah","Pan, D","Rani, Chair","Saino, T","Yamano, Hiroya"}	{"Non Seagrass"}
1976898	Stable isotope analysis of production and trophic relationships in a tropical marine hard-bottom community	2006	{"Behringer, DC","Butler, MJ"}	{"No Stressor/Restoration","No Restoration Mentioned"}
1977839	The importance of seagrass beds as a habitat for fishery species	2001	{"Attrill, MJ","Bossey, SJ","Jackson, EL","Jones, MB","Rowden, AA"}	{"No Stressor/Restoration","No Restoration Mentioned","Coastal Habitat"}
1975947	Uptake of stable N isotopes by Myriophyllum spicatum is not selective	2010	{"Bradham, Andrew M.","Cohen, Risa A."}	{"Non Seagrass"}
1978099	Responses of seagrass to nutrients in the Great Barrier Reef, Australia	1999	{"Dennison, WC","Long, WJL","McKenzie, LJ","Udy, JW"}	{"Non Zostera"}
1972478	Temporal variations of Halodule wrightii meadows and associated fauna near their southern distribution limit in the southwestern Atlantic	2020	{"Lana, Paulo","Sordo, Laura"}	{"Non Zostera"}
1978755	PHOSPHORUS AND NITROGEN BEHAVIOR IN THE MEDITERRANEAN-SEA	1992	{"BETHOUX, JP","GENTILI, B","MADEC, C","MORIN, P"}	{"Non Seagrass"}
1977834	New markers - old questions: population genetics of seagrasses	2001	{"Reusch, TBH"}	{"No Stressor/Restoration"}
1974024	Variations of tidal exposures and seasons on growth, morphology, anatomy and physiology of the seagrass Halophila ovalis (R.Br.) Hook. f. in a seagrass bed in Trang Province, Southern Thailand	2016	{"Kaewsrikhaw, Ratchanee","Prathep, Anchana","Ritchie, Raymond J."}	{"Non Zostera"}
1975019	Salinity effects on Ruppia maritima L. seed germination and seedling survival at the Everglades-Florida Bay ecotone	2013	{"Filina, Joshua","Koch, Marguerite S.","Lara, Pedro U.","Madden, Christopher J.","Mattair, Amanda","Strazisar, Theresa"}	{"Non Seagrass"}
1976800	Leaf photoacclimatory responses of the tropical seagrass Thalassia testudinum under mesocosm conditions: a mechanistic scaling-up study	2007	{"Cayabyab, Napo M.","Enriquez, Susana"}	{"Non Zostera"}
1978531	Effects of light and nutrients on seagrass epiphytes	1995	{"Hanisak, M. D."}	{"Non Seagrass"}
1973806	Coastal Halophytic Vegetation	2017	{"BA Keith, DA","Boon, Paul","Lovelock, Catherine","Rogers, Kerrylee","Saintilan, Neil"}	{"Non Zostera"}
1972619	High temperature and crab density reduce atmospheric nitrogen fixation in Red Sea mangrove sediments	2020	{"Booth, Jenny M.","Daffonchio, Daniele","Duarte, Carlos M.","Fusi, Marco","Garcias-Bonet, Neus","Qashqari, Maryam S."}	{"Non Seagrass"}
1974075	Habitat and recreational fishing opportunity in Tampa Bay: Linking ecological and ecosystem services to human beneficiaries	2016	{"Dantin, Darrin","Fulford, Richard","Rogers, John","Russell, Marc","Yoskowitz, David"}	{"Non Zostera"}
1974892	Isolation and characterization of eighteen polymorphic microsatellite loci for the topical seagrass, Syringodium isoetifolium	2013	{"Arlyza, Irma S.","Karl, Stephen A.","Wainwright, Benjamin J."}	{"Non Zostera"}
1978130	Effects of plant cutting and dredging on habitat conditions in streams	1998	{"Kaenel, BR","Uehlinger, U"}	{"Non Seagrass"}
1974168	High Soil Sulfur Promotes Invasion of Exotic Spartina alterniflora into Native Phragmites australis Marsh	2015	{"An, Shuqing","Qing, Hua","Xia, Lu","Xiao, Yan","Yang, Wen","Zhao, Hui","Zhou, Changfang"}	{"Non Seagrass","Non Zostera"}
1979177	IMPORTANCE OF POSIDONIA-OCEANICA AND CYMODOCEA-NODOSA AS CONTRIBUTORS OF FREE AMINO-ACIDS IN WATER AND SEDIMENT OF SEAGRASS BEDS	1981	{"BAY D","BLACKBURN T H","HENRIKSEN K","JORGENSEN N O G"}	{"Non Zostera"}
1973506	Future heat waves due to climate change threaten the survival of Posidonia oceanica seedlings	2017	{"Guerrero-Meseguer, Laura","Marin, Arnaldo","Sanz-Lazaro, Carlos"}	{"Non Zostera"}
1977633	Trophic status based on nutrient concentration scales and primary producers community of tropical coastal lagoons influenced by groundwater discharges	2002	{"Colli, R","Herrera-Silveira, JA","Medina-Gomez, I"}	{"No Restoration Mentioned"}
1975838	The future of the oceans past	2010	{"Jackson, Jeremy B. C."}	{"Non Seagrass"}
1977255	Carbon cycling and bacterial carbon sources in pristine and impacted Mediterranean seagrass sediments	2004	{"Barron, C","Boschker, HTS","Duarte, CM","Holmer, M"}	{"Non Zostera"}
1974497	Sea turtles of the Cocos (Keeling) Islands, Indian Ocean	2014	{"Macrae, Ismail","Murray, Wendy","Thorn, Robert","Whiting, Andrea U.","Whiting, Scott D."}	{"Non Seagrass"}
1974229	DR. KANJANA ADULYANUKOSOL (14 April 1962-10 January 2015)	2015	{"Akamatsu, Tomanari","Boonyanate, Potchana","Chansang, Hansa","Cherdsukjai, Phaothep","Dearden, Phil","Hines, Ellen","Ichikawa, Kotaro","Ilangakoon, Anouk","Kwan, Donna","Manopawitr, Petch","Monanunsap, Somchai","Ponnampalam, Louisa","Thongsukdee, Surasak"}	{"Non Seagrass"}
1973508	Growth performance and structure of a mangrove afforestation project on a former seagrass bed, Mindanao Island, Philippines	2017	{"Fortes, Miguel D.","Friess, Daniel A.","MacKenzie, Richard A.","Nadaoka, Kazuo","Nakaoka, Masahiro","Sharma, Sahadev","Uy, Wilfredo H."}	{"Non Seagrass"}
1978824	CHANGES IN THE BIOMASS AND SPECIES COMPOSITION OF MACROALGAE IN A EUTROPHIC ESTUARY	1991	{"LAVERY, PS","LUKATELICH, RJ","MCCOMB, AJ"}	{"Non Zostera"}
1973593	Factor in species' conservation value	2017	{"Hochkirch, Axel"}	{"Non Seagrass"}
1974696	Response to saltstress in seagrasses: PIP1 antibody localization in Posidonia oceanica leaves (Reprinted from Aquatic Botany, vol 104, pg 213-219, 2013)	2014	{"Cavallini, A.","Innocenti, A. M.","Mazzuca, S.","Natali, L.","Nicastro, S.","Serra, I. A."}	{"Non Zostera"}
1979268	INFLUENCE OF SUBMERSED AQUATIC PLANTS ON TEMPERATURE-GRADIENTS IN SHALLOW-WATER BODIES	1977	{"DALE, HM","GILLESPIE, TJ"}	{"Non Seagrass"}
1978402	Response of bay scallops to spawner transplants: A test of recruitment limitation	1996	{"Luettich, RA","Peterson, CH","Summerson, HC"}	{"No Stressor/Restoration"}
1976796	Developing a saltmarsh classification tool for the European water framework directive	2007	{"Best, Mike","Massey, Alison","Prior, Amanda"}	{"Non Zostera","No Restoration Mentioned"}
1974609	A new non-indigenous Crassostrea species in Southwest Atlantic salt marshes affects mortality of the cordgrass Spartina alterniflora	2014	{"Addino, Mariana","Alvarez, Graciela","Iribarne, Oscar","Lomovasky, Betina J.","Montemayor, Diana I."}	{"Non Seagrass"}
1973724	Potential impacts of land use change dynamics and submarine groundwater discharge on fringing reefs of Kuroshima Island, Japan	2017	{"Dadhich, Ankita P.","Motomura, Y.","Nadaoka, Kazuo","Watanabe, A."}	{"Non Seagrass"}
1978854	OBSERVATIONS OF ASSOCIATIONS BETWEEN SEAGRASS BEDS AND MANATEES EAST CENTRAL FLORIDA USA	1991	{"HALL C R","PROVANCHA J A"}	{"No Stressor/Restoration"}
1979178	FEEDING RATES AND GROWTH OF THE FISH TILAPIA-ZILLII [CICHLIDAE] ON HYDRILLA-VERTICILLATA, POTAMOGETON-PECTINATUS AND MYRIOPHYLLUM-SPICATUM VAR EXALBESCENS AND INTERACTIONS IN IRRIGATION CANALS OF SOUTHEASTERN CALIFORNIA	1981	{"LEGNER, EF","MURRAY, CA"}	{"Non Seagrass"}
1975048	Spatial structuring of submerged aquatic vegetation in an estuarine habitat of the Gulf of Mexico	2013	{"Defeo, Omar","Eugenia Vega, Ma","Moriana Burgos-Leon, Aretha","Valdes, David"}	{"Non Zostera"}
1975730	Fish herbivory leads to shifts in seagrass Posidonia oceanica investments in sexual reproduction	2011	{"Alcoverro, T.","Ferrari, B.","Planes, S.","Raventos, N."}	{"Non Zostera"}
1977116	Genotypic variation in tolerance and resistance to fouling in the brown alga Facus vesiculosus	2005	{"Honkanen, T","Jormalainen, V"}	{"Non Seagrass"}
1973615	Chemical and biological characteristics of Albion reef in the South-West of Mauritius Island with special reference to primary production and N-2 fixation of benthic substrata	2017	{"Bagooli, Ranjeet","Casareto, Beatriz E.","Fujimura, Hiroyuki","Suzuki, Yoshimi"}	{"Non Seagrass"}
1977752	Biomass distribution and leaf nutrient concentrations and resorption of Thalassia hemprichii at Inhaca Island, Mozambique	2001	{"Bandeira, SO","Martins, ARO"}	{"Non Zostera"}
1974774	Site fidelity, ontogenetic shift and diet composition of green turtles Chelonia mydas in Japan inferred from stable isotope analysis	2014	{"Aoki, Shigeru","Hazel, Julia","Kameda, Kazunari","Kamezaki, Naoki","Reich, Kimberly","Shimada, Takahiro"}	{"Non Seagrass"}
1976460	Applicability of LOICZ catchment-coast continuum in a major Caribbean basin: The Magdalena River, Colombia	2008	{"Restrepo, Juan D."}	{"Non Seagrass"}
1974088	Status and ecology of Sirenian, Cetaceans and marine turtles in the Farasan Bank, Red Sea, Saudi Arabia.	2016	{"Al-Mansi, Ahmed M.A."}	{"Non Seagrass"}
1979000	THE DISTRIBUTION OF A BRYOZOAN ON SEAGRASS BLADES - SETTLEMENT, GROWTH, AND MORTALITY	1986	{"KEOUGH, MJ"}	{"No Stressor/Restoration"}
1976770	Invertebrate herbivory during the regeneration phase: experiments with a freshwater angiosperm	2007	{"De Boer, T.","Elger, A.","Hanley, M. E."}	{"Non Zostera"}
1976156	Reducing sulfur/nitrogen oxides, particulate matter emissions from marine engine flue gas by injecting gas into electron beam chamber, passing through by-product collector into which basic aqueous solution is sprayed and then through engine	NA	{"DE KAT J O","GENUARIO R D"}	{"Non Seagrass"}
1975768	Temperature effects on decomposition of a Posidonia oceanica mat	2011	{"Holmer, Marianne","Mateo, Miguel Angel","Pedersen, Mia Ostergaard","Serrano, Oscar"}	{"Non Zostera"}
1977581	Experimental evaluation of the effects of siltation-derived changes in sediment conditions on the Philippine seagrass Cymodocea rotundata	2002	{"Borum, J","Duarte, CM","Fortes, MD","Halun, Z","Kamp-Nielsen, L","Terrados, J"}	{"Non Zostera"}
1978074	Nutrient cycling in the water column of a subtropical seagrass meadow	1999	{"Benner, R","Ziegler, S"}	{"Non Zostera"}
1976474	The relative importance of water motion on nitrogen uptake by the subtidal macroalga Adamsiella chauvinii (Rhodophyta) in winter and summer	2008	{"Hurd, Catriona L.","Kregting, Louise T.","Pilditch, Conrad A.","Stevens, Craig L."}	{"Non Seagrass"}
1976756	The rocky intertidal biota of the Florida Keys: Fifty-two years of change after Stephenson and Stephenson (1950)	2007	{"Barimo, John F.","Purcell, John","Smith, Tyler B."}	{"Non Zostera"}
1976144	Denitrification efficiency for defining critical loads of carbon in shallow coastal ecosystems	2009	{"Eyre, Bradley D.","Ferguson, Angus J. P."}	{"Non Zostera"}
1979191	TRACE-METAL CYCLING IN TROPICAL-SUBTROPICAL ESTUARIES DOMINATED BY THE SEAGRASS THALASSIA-TESTUDINUM	1980	{"SCHROEDER, PB","THORHAUG, A"}	{"Non Zostera"}
1979170	NOTES ON THE LIFE-HISTORY OF THE STICHAEID FISH OPISTHOCENTRUS-TENUIS	1981	{"SHIOGAKI, M"}	{"Non Seagrass"}
1978293	Nitrogen uptake and allocation in the seagrass Amphibolis antarctica	1997	{"Paling, EI","Pedersen, MF","Walker, DI"}	{"Non Zostera"}
1972743	The importance of different juvenile habitats as nursery areas for a ubiquitous estuarine-dependent marine fish species	2019	{"James, Nicola C.","Leslie, Timothy D.","Potts, Warren M.","Rajkaran, Anusha","Whitfield, Alan K."}	{"Non Seagrass"}
1979027	THE DISTRIBUTION ABUNDANCE AND PRIMARY PRODUCTIVITY OF SUBMERGED MACROPHYTES IN A BELIZE BARRIER-REEF MANGROVE SYSTEM	1985	{"LITTLER D S","LITTLER M M","NORRIS J N","SIMS R H","TAYLOR P R"}	{"Non Zostera"}
1975658	Decline of a blue swimmer crab (Portunus pelagicus) fishery in Western Australia-History, contributing factors and future management strategy	2011	{"Caputi, Nick","Harris, David","Johnston, Danielle","Thomson, Adrian"}	{"Non Seagrass"}
1977068	Combined effects of water column nitrate enrichment, sediment type and irradiance on growth and foliar nutrient concentrations of Potamogeton alpinus	2005	{"Boedeltje, G","Roelofs, JGM","Smolders, AJP"}	{"Non Zostera","No Restoration Mentioned"}
2545912	Seagrass meadows improve inflowing water quality in aquaculture ponds	2020	{"Costa, Monya M.","Cunha, Maria Emilia","Freitas, Catia","Luna, Ravi Araujo","Martins, Marcio","Moreira, Marcio","Olive, Irene","Pousao-Ferreira, Pedro","Quental-Ferreira, Hugo","Santos, Rui","Silva, Andre","Silva, Joao","Soares, Florbela","de los Santos, Carmen B."}	{"Non Zostera"}
1978280	Mariculture and enhancement of wild populations of queen conch (Strombus gigas) in the western Atlantic	1997	{"Iversen, ES","Jory, DE"}	{"Non Seagrass"}
1977082	Attenuation of photosynthetically available radiation (PAR) in Florida Bay: Potential for light limitation of primary producers	2005	{"Boyer, JN","Hitchcock, GL","Kelble, CR","Ortner, PB"}	{"Non Zostera"}
1979239	TAXONOMIC CHARACTERISTICS OF AQUATIC PLANTS FROM THE ALIMENTARY TRACT OF GRASS CARP CTENOPHARYNGODON-IDELLA	1979	{"CARTER C C","HESTAND R S"}	{"Non Seagrass"}
1978461	FLOWERING AND SHORT SHOOT AGE IN 3 THALASSIA-TESTUDINUM MEADOWS OFF WEST-CENTRAL FLORIDA	1995	{"DAWES, CJ","WITZ, MJA"}	{"Non Zostera"}
1978437	The production and trophic ecology of shallow-water fish assemblages in southern Australia .3. General relationships between sediments, seagrasses, invertebrates and fishes	1995	{"Edgar, GJ","Shaw, C"}	{"Non Zostera"}
1975569	Seasonal changes in tissue nutrient concentrations of macroalgae and aquatic angiosperms in Mediterranean ponds (North-Western Spain)	2011	{"Fernandez-Alaez, Camino","Fernandez-Alaez, Margarita"}	{"Non Seagrass"}
1978630	MESOCOSM EVALUATION OF BENSULFURON METHYL ACTIVITY ON EURASIAN WATERMILFOIL, VALLISNERIA, AND AMERICAN PONDWEED	1994	{"CROUCH, RM","DICK, GO","GETSINGER, KD","NELSON, LS"}	{"Non Seagrass"}
2545921	Native and Invasive Macrophytes Differ in Their Effectiveness as Nurseries for Juvenile Endangered Salmon	2020	{"Ali, Bashir A.","Dethier, Megan N.","Hughes, Brent B.","Noor, Nusrat J.","Soto, Soledad G."}	{"No Stressor/Restoration","Coastal Habitat"}
1973968	Significant nitrogen fixation activity associated with the phyllosphere of Mediterranean seagrass Posidonia oceanica: first report	2016	{"Agawin, Nona S. R.","Alcon, Elena","Busquets, Antonio","Cryer, Callum","Ferriol, Pere","Moya, Gabriel","Sintes, Eva","Vidal, Constanza"}	{"Non Zostera"}
1975434	Stable isotope and fatty acid biomarkers of seagrass, epiphytic, and algal organic matter to consumers in a pristine seagrass ecosystem	2012	{"Belicka, Laura L.","Burkholder, Derek","Fourqurean, James W.","Heithaus, Michael R.","Jaffe, Rudolf","Macko, Stephen A."}	{"No Stressor/Restoration"}
1974398	Interactive effects of pesticide exposure and habitat structure on behavior and predation of a marine larval fish	2015	{"Anderson, Todd W.","Cherr, Gary N.","Morgan, Steven G.","Renick, Violet Compton"}	{"Non Seagrass"}
1972755	Physiological responses of a juvenile marine estuarine-dependent fish (Family Sparidae) to changing salinity	2019	{"Kisten, Y.","Mpinga, M. S.","Paul, S.","Perissinotto, R.","Strydom, N. A."}	{"Non Seagrass"}
1979359	SOME CONTRIBUTIONS FROM THE LAND IN DETERMINING CONDITIONS OF LIFE IN THE SEA	1947	{"NELSON, TC"}	{"Non Seagrass"}
1977616	Annual nitrogen budget of the seagrass Posidonia oceanica as determined by in situ uptake experiments	2002	{"Bouquegneau, JM","Dauby, P","Gobert, S","Lepoint, G","Millet, S"}	{"Non Zostera"}
1977658	Mercury removal, methylmercury formation, and sulfate-reducing bacteria profiles in wetland mesocosms	2002	{"Fu, TT","Gladden, JB","Harmon, SM","King, JK"}	{"Non Seagrass"}
1976570	Nutrient fluxes in the microalgal-dominated intertidal regions of the lower Yaquina Estuary, Oregon (USA).	2007	{"Sigleo, Anne C.","Sin, Yongsik","Song, Eunsook"}	{"Non Seagrass"}
1977466	Detection of gaps in the spatial coverage of coral reef monitoring projects in the US Caribbean and Gulf of Mexico	2003	{"Asch, RG","Turgeon, DD"}	{"Non Seagrass","Coastal Habitat"}
1978176	Considerations of the effect of residual stresses on fatigue of welded aluminium alloy structures	1998	{"Berkovits, A","Di, S","Kelly, DW"}	{"Non Seagrass"}
1975686	Marine fisheries declines viewed upside down: human impacts on consumer-driven nutrient recycling	2011	{"Allgeier, Jacob E.","Dahlgren, Craig P.","Layman, Craig A.","Rosemond, Amy D.","Yeager, Lauren A."}	{"Non Zostera"}
1972952	Seasonal and Interannual Variability in Net Ecosystem Production of a Subtropical Coastal Lagoon Inferred from Monthly Oxygen Surveys	2019	{"Boyer, Joseph N.","Briceno, Henry O.","Herrmann, Maria","Kemp, W. Michael","Najjar, Raymond G.","Seidensticker, Lauren E.","Tomaso, Daniel J."}	{"Non Seagrass","Coastal Habitat"}
1977032	A model to estimate potential submersed aquatic vegetation habitat based on studies in Lake Pontchartrain, Louisiana	2005	{"Cho, HJ","Poirrier, MA"}	{"Non Seagrass"}
1974612	Recovery trends of Scrobicularia plana populations after restoration measures, affected by extreme climate events	2014	{"Cardoso, P. G.","Dolbeth, M.","Pardal, M. A.","Verdelhos, T."}	{"Non Seagrass"}
1975956	Sensitivity of the seagrass Cymodocea nodosa to hypersaline conditions: A microcosm approach	2010	{"Pages, Jordi F.","Perez, Marta","Romero, Javier"}	{"Non Zostera","No Restoration Mentioned"}
1978281	Effects of light, salinity, and thermoperiod on the seed germination of halophytes	1997	{"Khan, MA","Ungar, IA"}	{"Non Seagrass"}
1976077	SATELLITE-BASED MAPPING OF CORAL REEFS IN EAST ASIA, MICRONESIA AND MELANESIA REGIONS	2010	{"Akatsuka, S","Aramaki, M.","BE Kajiwara, K","Endo, T","Hiramatsu, T.","Kakuta, S.","Mitani, T.","Muramatsu, K","Numata, Y.","Ono, A","Soyama, N","Yamano, H."}	{"No Stressor/Restoration","Coastal Habitat"}
1976668	Structure and ordination of epiphytic invertebrate communities of four coastal wetlands in green bay, lake Michigan	2007	{"Sager, Paul E.","Schneider, Patricia"}	{"Non Seagrass"}
1975079	Boat anchoring impacts coastal populations of the pen shell, the largest bivalve in the Mediterranean	2013	{"Alvarez, Elvira","Deudero, Salud","Duarte, Carlos M.","Hendriks, Iris E.","Jorda, Gabriel","Marba, Nuria","Tavecchia, Giacomo","Tenan, Simone"}	{"Non Seagrass"}
1979347	The nutritive value of seagrass Zostera marina	1962	{"AKYILDIZ, A. REMZI"}	{"No Stressor/Restoration"}
1973771	Mangroves	2017	{"BE Inniss, L","Calumpong, Hilconida","Ferreira, Beatrice Padovani","GP United Nat","Granek, Elise","Green, Sean O.","Ruwa, Renison","Simcock, A","Soares, Mario","Webber, Mona"}	{"Non Seagrass"}
1975355	Genotypic diversity enhances invasive ability of Spartina alterniflora	2012	{"Chen, X. Y.","Jiao, J.","Shen, D. W.","Shi, M. M.","Wang, X. Y.","Xu, N. N.","Yu, S.","Zhou, X. F."}	{"Non Zostera"}
1978413	Herbivory on Posidonia oceanica: Magnitude and variability in the Spanish Mediterranean	1996	{"Cebrian, J","Duarte, CM","Enriquez, S","Gallegos, M","Marba, N","Olesen, B"}	{"Non Zostera"}
1978850	Ecology of two caprellid species (Amphipoda, Caprellidae) in the Zostera community of Vityaz Bay (Sea of Japan).	1991	{"BE Kafanov, A.I.","Fedotov, P.A."}	{"No Stressor/Restoration"}
1977711	Declining biodiversity: Why species matter and how their functions might be restored in Californian tidal marshes	2001	{"Callaway, JC","Sullivan, G","Zedler, JB"}	{"Non Zostera"}
1976497	Nutrient dependent effects of consumer identity and diversity on freshwater ecosystem function	2008	{"Dzialowski, Andrew R.","Smith, Val H."}	{"Non Seagrass"}
1974048	Effects of fish predation on Posidonia oceanica amphipod assemblages	2016	{"Caut, S.","Gobert, S.","Lepoint, G.","Navone, A.","Panzalis, P.","Perez-Perera, A.","Sturaro, N."}	{"Non Zostera"}
1975389	Isolation and characterization of phosphate-solubilizing bacteria from seagrass rhizosphere soil	2012	{"Dilipan, Elangovan","Ghosh, Upasana","Kannan, Lakshmanan","Raja, Subramanian","Subhashini, Ponnambalam","Thangaradjou, Thirunavukarassu"}	{"Non Zostera","No Restoration Mentioned"}
1979257	SPECIES COMPOSITION AND DISTRIBUTION OF SEAGRASS BEDS IN THE INDIAN RIVER LAGOON FLORIDA	1978	{"THOMPSON M J"}	{"Non Zostera","Coastal Habitat"}
1976695	Heavy metal transfer from composted macroalgae to crops	2007	{"Greger, Maria","Kautsky, Lena","Malm, Torleif"}	{"Non Seagrass"}
1979173	THE BIOLOGY OF AUSTRALIAN WEEDS .7. HYDRILLA-VERTICILLATA (LF) ROYLE	1981	{"CAULDWELL, AJ","FINLAYSON, CM","SWARBRICK, JT"}	{"Non Seagrass"}
1975023	Ecology of Brazilian seagrasses: Is our current knowledge sufficient to make sound decisions about mitigating the effects of climate change?	2013	{"Magalhaes, Karine Matos","Rocha-Barreira, Cristina de Almeida","de Souza Barros, Kcrishna Vilanova"}	{"Non Zostera"}
1976486	Sedimentary iron inputs stimulate seagrass (Posidonia oceanica) population growth in carbonate sediments	2008	{"Alvarez, Elvira","Calleja, Maria Ll.","Diaz-Almela, Elena","Duarte, Carlos M.","Garcias-Bonet, Neus","Holmer, Marianne","Marba, Nuria"}	{"Non Zostera"}
1975294	Global patterns in the impact of marine herbivores on benthic primary producers	2012	{"Campbell, Alexandra H.","Coleman, Ross A.","Duffy, J. Emmett","Edgar, Graham J.","Jormalainen, Veijo","Poore, Alistair G. B.","Reynolds, Pamela L.","Sotka, Erik E.","Stachowicz, John J.","Taylor, Richard B.","Vanderklift, Mathew A."}	{"Non Seagrass"}
1975696	Fast and easy method for seagrass monitoring: Application of acoustic telemetry to precision mapping of Posidonia oceanica beds	2011	{"Antonin, Guilbert","Florian, Holon","Julie, Deter","Laurent, Ballesta","Marie, Guillot","Pierre, Boissery","Pierre, Descamp","Valerie, Raimondino"}	{"Non Zostera"}
1972601	Growth and recovery after small-scale disturbance of a rapidly-expanding invasive seagrass in St. John, US Virgin Islands	2020	{"Chiquillo, Kelcie L.","Cross, Candice","Fong, Peggy","Kelley, Thomas","Muthukrishnan, Ranjan","Toline, C. Anna","Willette, Demian A.","Zweng, Regina"}	{"Non Zostera"}
1977039	Mercury in Florida Bay fish: Spatial distribution of elevated concentrations and possible linkages to Everglades restoration	2005	{"Crumley, PH","Evans, DW"}	{"Non Seagrass"}
1975708	Nitrogen versus phosphorus limitation in a subtropical coastal embayment (Moreton Bay; Australia): Implications for management	2011	{"Eyre, Bradley D.","Johnstone, Ron","Wulff, Fred"}	{"Non Seagrass"}
1977316	Effects of simultaneous changes in light, nutrients, and herbivory levels, on the structure and function of a subtropical turtlegrass meadow	2004	{"Heck, KL","Ibarra-Obando, SE","Spitzer, PM"}	{"Non Zostera","No Restoration Mentioned"}
1976007	The AtNHX1 exchanger mediates potassium compartmentation in vacuoles of transgenic tomato	2010	{"Barragan, Veronica","Bressan, Ray A.","Cubero, Beatriz","El-Hamdaoui, Abdelaziz","Fernandez, Jose A.","Hasegawa, Paul M.","Leidi, Eduardo O.","Pardo, Jose M.","Quintero, Francisco J.","Rubio, Lourdes","Teresa Ruiz, M."}	{"Non Seagrass"}
2100089	Understanding the fate of shrimp aquaculture effluent in a mangrove ecosystem: Aiding management for coastal conservation	2020	{"Chaiharn, Chatdanai","Hargan, Kathryn E.","Los Huertos, Marc","McAdoo, Brian","Nuangsaeng, Bunlung","Siriwong, Sarawut","Tassawad, Pisut","Williams, Branwen"}	{"Non Seagrass","Coastal Habitat"}
2545960	Integrating outcomes of IUCN red list of ecosystems assessments for connected coastal wetlands	2020	{"Bishop, Melanie J.","Bland, Lucie","Brown, Christopher J.","Connolly, Rod M.","Haig, Jodie A.","Maxwell, Paul S.","Olds, Andrew D.","Pearson, Ryan M.","Sievers, Michael","Tulloch, Vivitskaia J. D.","Turschwell, Mischa P."}	{"No Stressor/Restoration"}
1978272	Reefs since Columbus	1997	{"Jackson, JBC"}	{"Non Seagrass"}
1978118	Mesoscale distribution patterns of Queen Conch (Strombus gigas linne) in Exuma Sound, Bahamas: Links in recruitment from larvae to fishery yields	1998	{"Mehta, N","Ray-Culp, M","Stoner, AW"}	{"Non Seagrass"}
1977025	Photochemical efficiency of amphibious plants in an intermittent lake	2005	{"Gaberscik, A","Krzic, NS"}	{"Non Seagrass"}
1973577	The trophic role of a large marine predator, the tiger shark Galeocerdo cuvier	2017	{"Abrantes, Katya G.","Barnett, Adam","Burkholder, Derek","Ferreira, Luciana C.","Frisch, Ashley J.","Heithaus, Michael R.","Holmes, Bonnie J.","Meekan, Mark G.","Meeuwig, Jessica","Nowicki, Robert","Pepperell, Julian G.","Thums, Michele","Vaudo, Jeremy","Zamora, Lara M."}	{"Non Zostera"}
1976476	Non-additive, identity-dependent effects of detrital species mixing on soft-sediment communities	2008	{"Bishop, Melanie J.","Kelaher, Brendan P."}	{"Non Zostera"}
1977511	Restoration that targets function as opposed to structure: replacing lost bivalve production and filtration	2003	{"Catena, J","DeAlteris, JT","McCay, DPF","Peterson, CH"}	{"Non Seagrass"}
1977045	Macroalgal blooms on southeast Florida coral reefs II. Cross-shelf discrimination of nitrogen sources indicates widespread assimilation of sewage nitrogen	2005	{"Barile, PJ","Lapointe, BE","Littler, DS","Littler, MM"}	{"Non Seagrass","Coastal Habitat"}
1972687	Coarse- and fine-scale acoustic telemetry elucidates movement patterns and temporal variability in individual territories for a key coastal mesopredator	2020	{"Becker, Sarah L.","Danylchuk, Andy J.","Finn, John T.","Hillis-Starr, Zandy","Jordaan, Adrian","Lundgren, Ian","Novak, Ashleigh J.","Pollock, Clayton G."}	{"Non Seagrass"}
1977771	Effects of macrophyte species richness on wetland ecosystem functioning and services	2001	{"Engelhardt, KAM","Ritchie, ME"}	{"Non Seagrass"}
1974845	Contemporary reliance on bicarbonate acquisition predicts increased growth of seagrass Amphibolis antarctica in a high-CO2 world	2014	{"Burnell, Owen W.","Connell, Sean D.","Irving, Andrew D.","Russell, Bayden D.","Watling, Jennifer R."}	{"Non Seagrass"}
1976816	Response of epiphytic foraminiferal communities to natural eutrophication in seagrass habitats off Man O'War Cay, Belize	2006	{"Richardson, Susan L."}	{"Non Zostera","No Restoration Mentioned"}
1976739	Using seascape types to explain the spatial patterns of fish in the mangroves of SW Puerto Rico	2007	{"Caldow, Chris","Hile, Sarah D.","Monaco, Mark E.","Pittman, Simon J."}	{"Non Zostera","No Stressor/Restoration","No Restoration Mentioned"}
1977252	Decomposition of macrophytes and dynamics of enzyme activities in subalpine marshes in Lake Tahoe basin, USA	2004	{"Kim, JG","Rejmankova, E"}	{"Non Seagrass"}
1978767	PHYSIOLOGICAL-EFFECTS OF SALINITY ON A MARINE DIAZOTROPHIC BACTERIUM ASSOCIATED WITH THE SEAGRASS HALODULE-WRIGHTII	1992	{"DAVIDSON, TR","HAYASAKA, SS"}	{"Non Zostera"}
2545964	Habitat changes over 45 years on the small Mediterranean archipelago of the Medes Islands (Catalonia, NE Spain)	2020	{"Bou, Jordi","Carreras, Jordi","Vilar, Lluis"}	{"Non Seagrass"}
1974456	Biology of Mangroves and Seagrasses, 3rd Edition	2015	{"BA Hogarth, PJ","Hogarth, PJ"}	{"No Stressor/Restoration"}
1976249	Photosynthetic responses of Haalophila stipulacea to a light gradient. I. In situ energy partitioning of non-photochemical quenching	2009	{"Beer, Sven","Paulo, Diogo","Runcie, John W.","Santos, Rui","Sharon, Yoni","Silva, Joao"}	{"Non Zostera"}
1975752	Response of Posidonia oceanica to burial dynamics	2011	{"Alcoverro, Teresa","Manzanera, Marta","Romero, Javier","Tomas, Fiona"}	{"Non Zostera"}
1978505	ANIMAL-PLANT DEFENSE ASSOCIATION - THE SOFT CORAL SINULARIA SP (CNIDARIA, ALCYONACEA) PROTECTS HALIMEDA SPP FROM HERBIVORY	1995	{"KERR, JNQ","PAUL, VJ"}	{"Non Seagrass","Coastal Habitat"}
1974539	Seagrass Canopy Photosynthetic Response Is a Function of Canopy Density and Light Environment: A Model for Amphibolis griffithii	2014	{"Fearns, Peter","Hedley, John D.","McMahon, Kathryn"}	{"Non Zostera","No Restoration Mentioned"}
1978039	Changes in seagrass-associated fish and crustacean communities on Florida Bay mud banks: The effects of recent ecosystem changes?	1999	{"Bjorgo, KA","Camp, DK","Matheson, RE","Sogard, SM"}	{"Non Zostera"}
1975929	Effects of local fisheries and ocean productivity on the northeastern Ionian Sea ecosystem	2010	{"Chiara, Piroddi","Giovanni, Bearzi","Villy, Christensen"}	{"Non Seagrass","Non Zostera","No Stressor/Restoration","No Restoration Mentioned","Coastal Habitat"}
1972942	The seagrass holobiont: understanding seagrass-bacteria interactions and their role in seagrass ecosystem functioning	2019	{"Hyndes, Glenn A.","Koenders, Annette","Laverock, Bonnie","Sawstrom, Christin","Tarquinio, Flavia"}	{"No Stressor/Restoration"}
1973589	Natural patches in Posidonia oceanica meadows: the seasonal biogeochemical pore water characteristics of two edge types	2017	{"Abadie, Arnaud","Borges, Alberto V.","Champenois, Willy","Gobert, Sylvie"}	{"Non Zostera"}
1977491	Stimulation of nitrogen fixation in refractory organic sediments by Caulerpa taxifolia (Chlorophyta)	2003	{"Chisholm, JRM","Moulin, P"}	{"Non Seagrass"}
1978667	MEASUREMENT OF THE CARRYING-CAPACITY OF BENTHIC HABITATS USING A METABOLIC-RATE BASED INDEX	1993	{"EDGAR, GJ"}	{"No Restoration Mentioned"}
1973196	The spatial and temporal drivers of pCO(2), pCH(4) and gas transfer velocity within a subtropical estuary	2018	{"Call, Mitchell","Holloway, Ceylena","Jeffrey, Luke C.","Maher, Damien T.","Reading, Michael J.","Santos, Isaac R.","Tait, Douglas R."}	{"Non Seagrass"}
1973586	Trophic redundancy among fishes in an East African nearshore seagrass community inferred from stable-isotope analysis	2017	{"Gastrich, K. R.","Heithaus, M. R.","Kiszka, J. J.","Matich, P."}	{"Non Seagrass"}
1976424	Is coastal lagoon eutrophication likely to be aggravated by global climate change?	2008	{"Lloret, Javier","Marin, Arnaldo","Marin-Guirao, Lazaro"}	{"Non Seagrass","Non Zostera","No Restoration Mentioned","Coastal Habitat"}
1975715	Diurnal courses of net photosynthesis and photosystem II quantum efficiency of submerged Lagarosiphon major under natural light conditions	2011	{"Hofstra, Deborah","Hussner, Andreas","Jahns, Peter"}	{"Non Seagrass"}
1974333	Nitrogen dynamics on Guam as revealed by the seagrass Enhalus acoroides	2015	{"Baker, D. M.","Cuddy, M. R.","Kim, K.","Meyer, K. A.","Pinkerton, K.","Raymundo, L. J."}	{"Non Zostera"}
1975227	Epiphyte grazing enhances productivity of remnant seagrass patches	2012	{"Bishop, Melanie J.","Kelaher, Brendan P.","Ralph, Peter J.","Verhoeven, Mirella P. C."}	{"Non Zostera"}
2100384	Advancing aquatic vegetation management for fish in north temperate lakes	2019	{"Carlson, Kristin","Perleberg, Donna","Radomski, Paul"}	{"Non Seagrass"}
1972745	Effect of seagrass nutrient content and relative abundance on the foraging behavior of green turtles in the face of a marine plant invasion	2019	{"Barcia, Laura Garcia","Brito, Dominique N.","Heithaus, Michael R.","Kiszka, Jeremy J.","Rinaldi, Caroline","Whitman, Elizabeth R."}	{"Non Zostera","No Restoration Mentioned"}
1975367	POPULATION DECLINE AND RESTORATION OF SOFTSHELL CLAMS IN CHESAPEAKE BAY: ROLE OF PREDATION, HABITAT, DISEASE, AND ENVIRONMENTAL FACTORS	2012	{"Hines, Anson H.","Seitz, Rochelle D."}	{"Non Seagrass"}
1975424	Subaqueous Soils: Pedogenesis, Mapping, and Applications	2012	{"BE Lin, H","Rabenhorst, M. C.","Stolt, M. H."}	{"Non Seagrass"}
1977207	Sources of organic matter in seagrass-colonized sediments: A stable isotope study of the silt and clay fraction from Posidonia oceanica meadows in the western Mediterranean	2005	{"Duarte, CM","Kennedy, DP","Kennedy, H","Marba, N","Papadimitriou, S"}	{"Non Zostera"}
1974789	An ecological study of Electra posidoniae Gautier, 1954 (Cheilostomata, Anasca), a bryozoan epiphyte found solely on the seagrass Posidonia oceanica (L.) Delile, 1813	2014	{"Gobert, Sylvie","Lepoint, Gilles","Mouchette, Olivier","Pelaprat, Corine"}	{"Non Zostera"}
1975480	Seasonal and interannual variations of community metabolism rates of a Posidonia oceanica seagrass meadow	2012	{"Borges, A. V.","Champenois, W."}	{"Non Zostera"}
1978720	BACTERIAL DECOMPOSITION OF DETRITUS IN A TROPICAL SEAGRASS (SYRINGODIUM-ISOETIFOLIUM) ECOSYSTEM, MEASURED WITH [METHYL-H-3]THYMIDINE	1993	{"KOGURE, K","POLLARD, PC"}	{"Non Zostera"}
1976669	Reproductive biology of Paracentrotus lividus (Echinodermata : Echinoidea) in two contrasting habitats of northern Tunisia (south-east Mediterranean)	2007	{"Guillou, Monique","Sellem, Feriel"}	{"Non Seagrass"}
1976408	Iron, zinc, copper, lead and cadmium contents in Ruppia maritima from a Mediterranean coastal lagoon: monthly variation and distribution in different plant fractions	2008	{"Boubonari, Theodora","Kevrekidis, Theodoros","Malea, Paraskevi"}	{"Non Seagrass","Non Zostera"}
1976763	Effects of ammonium on growth, nitrogen and carbohydrate metabolism of Potamogeton maackianus A. Benn	2007	{"Cao, Te","Li, Huijuan","Ni, Leyi"}	{"Non Seagrass"}
1975457	Leaf-fracture properties correlated with nutritional traits in nine Australian seagrass species: implications for susceptibility to herbivory	2012	{"Bouma, Tjeerd J.","Brun, Fernando G.","Cambridge, Marion L.","Lucas Perez-Llorens, Jose","Onoda, Yusuke","Vergara, Juan J.","de los Santos, Carmen B."}	{"No Stressor/Restoration"}
1974350	Gasification and pyrolysis of Posidonia oceanica in the presence of dolomite	2015	{"Conesa, Juan A.","Domene, A."}	{"Non Zostera"}
1976915	Nekton of new seagrass habitats colonizing a subsided salt marsh in Galveston Bay, Texas	2006	{"King, Seth P.","Sheridan, P."}	{"Non Zostera","No Restoration Mentioned"}
1976153	Physical and topographic factors affecting suspended particulate matter composition in a shallow tropical estuary	2009	{"Koike, Isao","Komatsu, Teruhisa","Umezawa, Yu","Yamamuro, Masumi"}	{"Non Seagrass"}
1973166	Contrasting effects of ocean warming on different components of plant-herbivore interactions	2018	{"Alcoverro, Teresa","Arthur, Rohan","Boada, Jordi","De Bari, Harriet","Pages, Jordi F.","Perez, Marta","Romero, Javier","Sanmarti, Neus","Smith, Timothy M.","Tomas, Fiona"}	{"Non Zostera","No Restoration Mentioned"}
1976372	The fate of organic matter sources in coastal environments: a comparison of three Mediterranean lagoons	2008	{"Mazzola, A.","Vizzini, S."}	{"Non Seagrass"}
1976999	Changes in benthic fish assemblages as a consequence of coastal works in a coastal lagoon: The Mar Menor (Spain, Western Mediterranean)	2006	{"Barcala, E","Grarcia-Charton, JA","Marcos, C","Perez-Ruzafa, A"}	{"Non Zostera"}
1977426	Effects of submerged macrophytes on sediment resuspension and internal phosphorus loading in Lake Hiidenvesi (southern Finland)	2003	{"Horppila, J","Nurminen, L"}	{"Non Seagrass"}
1978062	Dietary studies of marine mammals using stable carbon and nitrogen isotopic ratios of teeth	1999	{"Macko, SA","Walker, JL"}	{"Non Seagrass","Non Zostera","No Stressor/Restoration","No Restoration Mentioned","Coastal Habitat"}
1973713	Niche metrics suggest euryhaline and coastal elasmobranchs provide trophic connections among marine and freshwater biomes in northern Australia	2017	{"Crook, David A.","Every, Sharon L.","Fulton, Christopher J.","Kyne, Peter M.","Pethybridge, Heidi R."}	{"Non Seagrass"}
1979087	A COMPARISON OF PROCEDURES FOR THE ISOLATION OF CAMPYLOBACTERS FROM SEAGULL FECES	1983	{"FRICKER, CR","GIRDWOOD, RWA","MUNRO, D"}	{"Non Seagrass"}
1973358	Sea urchins exposed to near-future elevated seawater temperature alter resource allocation under low-quality food conditions	2018	{"Brothers, Cecilia J.","McClintock, James B."}	{"Non Seagrass"}
1974880	Seed photosynthesis enhances Posidonia oceanica seedling growth	2013	{"Celdran, David","Marin, Arnaldo"}	{"Non Zostera"}
1974795	Establishment and management of fisheries refugia in Phu Quoc Marine Protected Area, Vietnam.	2014	{"Nguyen Van Long","Vo Si Tuan"}	{"Non Seagrass"}
1976587	Spatial and temporal variability in dissolved inorganic nitrogen fluxes at the sediment-water interface in lake illawarra, Australia	2007	{"Chenwei, Su","Morrison, R. J.","Qu, Wenchuan","West, R. J."}	{"Non Seagrass"}
1977954	Fish habitat characterization and assessment: Approach to integrate seafloor features and juvenile organisms data	2000	{"GP IEEE; IEEE","Wilbur, AR"}	{"Non Seagrass"}
1976984	Phytoplankton and macrophyte contributions to littoral food webs in the Galician upwelling estimated from stable isotopes	2006	{"Alvarez-Ossorio, Maria Teresa","Bode, Antonio","Varela, Manuel"}	{"Non Seagrass"}
1976293	Interactive effects of timing, intensity and duration of experimental shading on Amphibolis griffithii	2009	{"Lavery, Paul S.","McMahon, Kathryn","Mulligan, Michael","Tennyson, Andrew"}	{"Non Zostera"}
1975846	Links Between Bottom-Water Anoxia, the Polychaete Nereis diversicolor, and the Growth of Green-Algal Mats	2010	{"Engelsen, Anna","Hulth, Stefan","Sundback, Kristina"}	{"Non Seagrass"}
1976983	Mangroves as fish habitat: 50 years of field studies	2006	{"Faunce, Craig H.","Serafy, Joseph E."}	{"Non Seagrass"}
1979315	NITROGEN-FIXATION ASSOCIATED WITH SEAGRASSES	1973	{"CHANEY, B","GOERING, JJ","MCROY, CP"}	{"No Stressor/Restoration"}
1978545	NITROGEN AND PHOSPHORUS UPTAKE IN SEEDLINGS OF THE SEAGRASS AMPHIBOLIS-ANTARCTICA IN WESTERN-AUSTRALIA	1994	{"MCCOMB, AJ","PALING, EI"}	{"Non Zostera"}
1973654	Using eDNA to determine the source of organic carbon in seagrass meadows	2017	{"Adame, Maria Fernanda","Atwood, Trisha B.","Lovelock, Catherine E.","Reef, Ruth","Sampayo, Eugenia M.","Samper-Villarreal, Jimena"}	{"No Stressor/Restoration","Coastal Habitat"}
1978309	Is the apical growth of Cymodocea nodosa dependent on clonal integration?	1997	{"Duarte, CM","Kenworthy, WJ","Terrados, J"}	{"Non Zostera"}
1974370	Health status and influencing factors of coral reef ecosystems in Houhai waters, Sanya, Hainan Province.	2015	{"Chen Shi-quan","Li Yuan-chao","Yang Yi","Zheng Xin-qing"}	{"Non Seagrass","Non Zostera","Coastal Habitat"}
1976363	Environmental factors controlling the vegetation zonation patterns and distribution of vegetation types in the Olifants Estuary, South Africa	2008	{"Adams, J. B.","Bate, G. C.","Bornman, T. G."}	{"No Stressor/Restoration"}
1976905	Diet of the green turtle (Chelonia mydas) at Ra's Al Hadd, Sultanate of Oman	2006	{"Al-Kiyumi, A.","Ferreira, B.","Garcia, M.","Jupp, B. P."}	{"Non Seagrass"}
1972523	Living (stained) foraminifera in the Lesser Syrtis (Tunisia): influence of pollution and substratum	2020	{"Beccari, Valentina","Coletti, Giovanni","El Kateb, Akram","Spezzaferri, Silvia","Stainbank, Stephanie"}	{"Non Seagrass"}
1978869	NORTH-SEA STRATEGIES	1991	{"HOOGWEG, PHA","VANDEWETERING, BGM","WULFFRAAT, KJ"}	{"Non Seagrass"}
1976066	Taxonomic resolution needed to describe invertebrate assemblages and to detect harvesting effects on coral reef ecosystems	2010	{"Amouroux, J. M.","Bigot, L.","Dumas, P.","Ferraris, J.","Jimenez, H."}	{"Non Seagrass","Coastal Habitat"}
1979331	RESPONSE OF SAGO PONDWEED TO PERIODIC REMOVAL OF TOPGROWTH	1969	{"BRUNS, VF","KELLEY, AD","OGG, AG"}	{"Non Seagrass"}
1973263	Observed and predicted impacts of climate change on the estuaries of south-western Australia, a Mediterranean climate region	2018	{"Hallett, Chris S.","Hobday, Alistair J.","McMahon, Kathryn","Thompson, Peter A.","Tweedley, James R.","Valesini, Fiona J."}	{"Non Seagrass"}
1973939	Effects of suspended culture of the seaweed Laminaria japonica aresch on the flow structure and sedimentation processes	2016	{"Bi Haibo","Huang Haijun","Liu Yanxia","Yan Liwen","Zhang Zehua"}	{"Non Seagrass"}
1979056	GERMINATION OF NAJAS-MARINA L	1984	{"AGAMI, M","WAISEL, Y"}	{"Non Zostera"}
1974404	Warming Reduces Pathogen Pressure on a Climate-Vulnerable Seagrass Species	2015	{"Duarte, Carlos M.","Garcias-Bonet, Neus","Olsen, Ylva S.","Potouroglou, Maria"}	{"No Restoration Mentioned"}
1976572	Seagrasses of south-west Australia: A conceptual synthesis of the world's most diverse and extensive seagrass meadows	2007	{"Cambridge, M. L.","Carruthers, T. J. B.","Dennison, W. C.","Kendrick, G. A.","Walker, D. I.","Waycott, M."}	{"No Restoration Mentioned"}
1977192	Light absorption efficiency and the package effect in the leaves of the seagrass Thalassia testudinum	2005	{"Enriquez, S"}	{"Non Zostera"}
1975107	Effects of salinity on seed germination and early seedling growth of the Mediterranean seagrass Posidonia oceanica (L.) Delile	2013	{"Fernandez-Torquemada, Yolanda","Luis Sanchez-Lizaso, Jose"}	{"Non Zostera"}
1974247	Hyperspectral discrimination of floating mats of seagrass wrack and the macroalgae Sargassum in coastal waters of Greater Florida Bay using airborne remote sensing	2015	{"Chlus, A.","Dierssen, H. M.","Russell, B."}	{"No Stressor/Restoration","No Restoration Mentioned"}
1977243	Potential availability of sedimentary phosphorus to sediment resuspension in Florida Bay	2004	{"Fischer, CJ","Ortner, PB","Zhang, JZ"}	{"Non Zostera"}
1977824	Spectral discrimination of coral reef bottom types	2001	{"Clementson, L","Done, T","GP IEEE; IEEE","Kutser, T","Miller, I","Parslow, J","Skirving, W","Wakeford, M"}	{"Non Seagrass"}
1973084	Benthic organisms as ecological indicators for the status assessment of coastal ecosystems	2018	{"Belak, Z. Lambasa","Dolenec, M.","Dolenec, T.","Kniewald, G.","Komar, D.","Lojen, S.","Matesic, S. S.","Orlando-Bonaca, M.","Vrhovnik, P."}	{"Non Zostera"}
1977865	Mercury bioaccumulation induces oxidative stress and toxicity to submerged macrophyte Potamogeton crispus L.	2000	{"Ali, MB","Behl, HM","Kumar, A","Rai, UN","Singh, N","Singh, SP","Tripathi, RD","Vajpayee, P"}	{"Non Seagrass"}
1976099	Feeding ecology of pelagic fish larvae and juveniles in slope waters of the Gulf of Mexico	2009	{"Rooker, J. R.","Wells, R. J. D."}	{"Non Seagrass"}
1977450	Effects of light reduction on growth of the submerged macrophyte Vallisneria americana and the community of root-associated heterotrophic bacteria	2003	{"Chancy, CA","Devereux, R","Genthner, FJ","Kurtz, JC","Macauley, JM","Quarles, RL","Yates, DF"}	{"Non Seagrass"}
1972710	Responses of morphological, physiological, and biochemical characteristics of maize (Zea mays L.) seedlings to atrazine stress	2019	{"Azizullah, Azizullah","Bibi, Shagufta","Daud, Muhammad K.","Khan, Sarzamin","Taimur, Nadia"}	{"Non Seagrass"}
1975328	Distribution of fish in seagrass, mangroves and coral reefs: life-stage dependent habitat use in Honduras	2012	{"Jaxion-Harm, Jessica","Saunders, James","Speight, Martin R."}	{"No Stressor/Restoration"}
1975435	Effects of seascape context on condition, abundance, and secondary production of a coral reef fish, Haemulon plumierii	2012	{"Acevedo, Christina L.","Layman, Craig A.","Yeager, Lauren A."}	{"Non Zostera"}
1973161	Zooplankton in the Huangyan Atoll, South China Sea: A comparison of community structure between the lagoon and seaward reef slope	2018	{"Ke Zhixin","Li Kaizhi","Tan Yehui"}	{"Non Seagrass"}
1972532	How clone can you go? Seedbank density and a multiscale assessment of genotypic diversity in the seagrass Halodule wrightii	2020	{"Hamilton, Ashley M.","Larkin, Patrick D.","Lopez, Anthony","Rubiano-Rincon, Sebastian"}	{"Non Zostera"}
1974453	Advances in Marine Biology, Vol 71	2015	NA	{"Non Seagrass"}
1977060	Underwater photosynthesis in flooded terrestrial plants: A matter of leaf plasticity	2005	{"Mommer, L","Visser, EJW"}	{"Non Seagrass"}
1976284	A validated population-dynamics model for Scrobicularia plana (Mollusca, Bivalvia) in a south-western European estuary	2009	{"Anastacio, P. M.","Marques, J. C.","Pardal, M. A.","Verdelhos, T."}	{"Non Seagrass"}
1976592	Application of color infrared aerial photography to assess macroalgal distribution in an eutrophic estuary, upper Newport Bay, California	2007	{"Kamer, Krista","Nezlin, Nikolay P.","Stein, Eric D."}	{"Non Seagrass"}
1978064	Disturbance and recovery of the macroflora of a seagrass (Halodule wrightii Ascherson) meadow in the Abrolhos Marine National Park, Brazil: an experimental evaluation of anchor damage	1999	{"Amado, GM","Creed, JC"}	{"Non Zostera"}
1972754	Declining size of adults and juvenile harvest threatens sustainability of a tropical gastropod, Lobatus gigas, fishery	2019	{"Appeldoorn, Richard S.","Babcock, Elizabeth A.","Gibson, Janet","Tewfik, Alexander"}	{"Non Seagrass"}
1973347	Benthic meiofaunal community response to the cascading effects of herbivory within an algal halo system of the Great Barrier Reef	2018	{"Atwood, Trisha B.","Booth, David J.","Hammill, Edward","Harborne, Alastair R.","Hinchliffe, Charles","Lovelock, Catherine E.","Macreadie, Peter I.","Madin, Elizabeth M. P.","Ollivier, Quinn R."}	{"Non Seagrass"}
1977878	Physiological and growth responses of Thalassia testudinum to environmentally-relevant periods of low irradiance	2000	{"Hanisak, MD","Kraemer, GP"}	{"Non Zostera"}
1972627	Composition and abundance of benthic microalgae from the Estuarine Complex of Paranagu√° Bay (southern Brazil) with special emphasis on toxic species	2020	{"Brustolin, Marco Colossi","Mafra Junior, Luiz Laureno","Moreira-Gonz√°lez, Angel Ram√≥n"}	{"Non Seagrass"}
1976569	Exotic and invasive aquatic plants in great lakes coastal wetlands: Distribution and relation to watershed land use and plant richness and cover	2007	{"Taylor, Debra L.","Trebitz, Anett S."}	{"Non Seagrass"}
1975117	Responses of the Mediterranean seagrass Posidonia oceanica to hypersaline stress duration and recovery	2013	{"Bernardeau-Esteller, Jaime","Luis Sanchez-Lizaso, Jose","Manuel Ruiz, Juan","Marin-Guirao, Lazaro","Miguel Sandoval-Gil, Jose"}	{"Non Zostera"}
1977436	A model of the seasonal dynamics of biomass and production of the seagrass Posidonia oceanica in the Bay of Calvi (Northwestern Mediterranean)	2003	{"Elkalay, K","Frangoulis, C","Gobert, S","Goffart, A","Hecq, JH","Lepoint, G","Skliris, N"}	{"Non Zostera"}
1974614	Responses of rhizomatous grass Phragmites communis to wind erosion: effects on biomass allocation	2014	{"Liu, Bo","Liu, Zhimin","Wang, Lixin","Wang, Zhengning"}	{"Non Seagrass"}
2100093	Squishy suction pumps: pore water release by upside-down jellyfish	2020	{"Gaddam, M. G.","Santhanakrishnan, A."}	{"Non Seagrass"}
1978477	ENERGY-FLOW IN THE KROMME ESTUARINE ECOSYSTEM, ST FRANCIS BAY, SOUTH-AFRICA	1995	{"BAIRD, D","HEYMANS, JJ"}	{"Non Seagrass"}
1976744	A review of land-sea coupling by groundwater discharge of nitrogen to New England estuaries: Mechanisms and effects	2007	{"Bowen, J. L.","Carmichael, R. H.","Cole, M. L.","Kroeger, K. D.","Pabich, W. J.","Tomasky, G.","Valiela, I."}	{"Non Seagrass","Non Zostera"}
1973897	Breeding and cultivating grass carp comprises building parent fish pond, parent fish cultivation, parent fish spawning, artificial fertilization, oosperm hatching, fish seedling incubation and planting plant in the pond	NA	{"LI S","WU W"}	{"Non Seagrass"}
1977174	Cold climate phosphorus uptake by submerged aquatic plants in a sewage treatment free water surface wetland	2005	{"Tonderski, KS","Ulen, B"}	{"Non Seagrass"}
1974717	Relationships between Meiofaunal Biodiversity and Prokaryotic Heterotrophic Production in Different Tropical Habitats and Oceanic Regions	2014	{"Corinaldesi, Cinzia","Danovaro, Roberto","Gambi, Cristina","Pusceddu, Antonio","Scopa, Mariaspina"}	{"Non Seagrass"}
1972820	Ocean acidification alters meiobenthic assemblage composition and organic matter degradation rates in seagrass sediments	2020	{"Arpe, Eleonora","Bianchelli, Silvia","Bulleri, Fabio","Buschi, Emanuela","Lardicci, Claudio","Pusceddu, Antonio","Ravaglioli, Chiara"}	{"Non Zostera"}
1978958	BIOGEOCHEMICAL STUDIES ON THE TRANSPORT OF ORGANIC-MATTER ALONG THE OTSUCHI RIVER WATERSHED, JAPAN	1987	{"IMAIZUMI, R","KARASAWA, K","MINAGAWA, M","MIZUTANI, H","TSUJI, T","WADA, E"}	{"Non Seagrass"}
1976589	Allometric scaling of plant life history	2007	{"Agusti, Susana","Duarte, Carlos M.","Marba, Nuria"}	{"Non Seagrass"}
1977408	Algal vs. macrophyte inputs to food webs of inland saline wetlands	2003	{"Hart, EA","Lovvorn, JR"}	{"Non Seagrass"}
1977870	Nutrient limitation of heterotrophic bacteria in Florida Bay	2000	{"Bootsma, H","Cavaletto, JF","Cotner, JB","Gardner, WS","Johengen, T","Sada, RH"}	{"Non Seagrass"}
1972534	Decoupling seasonal and temporal dynamics of macroalgal canopy cover in seagrass beds	2020	{"Camacho, Rodney","Houk, Peter"}	{"Non Zostera"}
1979358	SALINITY TOLERANCE OF ANOPHELES-QUADRIMACULATUS AND HABITAT PREFERENCE OF A-CRUCIANS-BRADLEYI	1947	{"VOGT, GB"}	{"Non Zostera"}
1974100	The potential of benthic iron and phosphorus fluxes to support the growth of a bloom forming toxic cyanobacterium Lyngbya majuscula, Moreton Bay, Australia	2016	{"Hanington, Peter","Johnstone, Ron","Rose, Andrew"}	{"Non Seagrass"}
1974109	The Rufiji Estuary: Climate Change, Anthropogenic Pressures, Vulnerability Assessment and Adaptive Management Strategies	2016	{"BE Diop, S","Machiwa, J","Sallema-Mtui, Rose","Scheren, P","Wagner, Greg M."}	{"Non Seagrass","Coastal Habitat"}
1978844	NITROGEN LIMITATION ON LAND AND IN THE SEA - HOW CAN IT OCCUR	1991	{"HOWARTH, RW","VITOUSEK, PM"}	{"Non Seagrass"}
1975456	A review of environment problems in the coastal sea of South China	2012	{"Han, Qiuying","Huang, Xiaoping","Shi, Ping","Xing, Qianguo"}	{"Non Seagrass"}
1973763	Oysters and the Ecosystem	2017	{"BA Bayne, B","Bayne, Brian"}	{"Non Seagrass"}
1979278	NITROGEN FIXATION ACETYLENE REDUCTION ASSOCIATED WITH SEA-URCHINS STRONGYLOCENTROTUS-DROEBACHIENSIS FEEDING ON SEAWEEDS AND EELGRASS	1977	{"FONG W","GUERINOT M L","PATRIQUIN D G"}	{"Non Seagrass"}
1977985	Primary production of deep-water Halophila ovalis meadows	1999	{"Erftemeijer, PLA","Stapel, J"}	{"Non Zostera"}
1976869	Restocking the sea cucumber Holothuria scabra: Sizing no-take zones through individual-based movement modelling	2006	{"Kirby, David S.","Purcell, Steven W."}	{"Non Seagrass"}
1978566	MACROPHYTES FROM LAKES IN THE EASTERN PYRENEES - COMMUNITY COMPOSITION AND ORDINATION IN RELATION TO ENVIRONMENTAL-FACTORS	1994	{"BALLESTEROS, E","CAMARERO, L","CATALAN, J","DELGADO, O","GACIA, E","PALAU, A","RIERA, JL"}	{"Non Seagrass"}
1977394	Reefs as contributors to diversity of epiphytic macroalgae assemblages in seagrass meadows	2004	{"Kendrick, GA","Lavery, PS","Van Elven, BR"}	{"Non Zostera"}
1975351	Sex-specific responses to fecundity selection in the broad-nosed pipefish	2012	{"Stoelting, Kai N.","Wilson, Anthony B.","Winkler, Jasmin D."}	{"Non Seagrass"}
1977973	The effect of groundwater seepage on nutrient delivery and seagrass distribution in the northeastern Gulf of Mexico	1999	{"Burnett, WC","Chanton, JP","Iverson, RL","Rutkowski, CM"}	{"Non Zostera"}
1972937	Assessment of coastal turbidity improvement potential by terrigenous sediment load reduction and its implications on seagrass inhabitable area in Banate Bay, central Philippines	2019	{"Campos, Wilfredo","Malingin, Mary Ann Cielo L.","Marivic Pepino, Ma","Miyajima, Toshihiro","Morimoto, Naoko","Nadaoka, Kazuo","Pagkalinawan, Homer","Ramos, Roseanne","Tanaka, Yoshiyuki","Watanabe, Atsushi","Yamamoto, Takahiro","Yoshikai, Masaya"}	{"Non Zostera"}
1974740	Dispatches	2014	{"Bradbury, Jane","Burton, Adrian","Deel, Lindsay","Fela, Jen","Gewin, Virginia"}	{"Non Seagrass"}
1972803	Dataset of numerical modelling results of wave thrust on salt marsh boundaries with different seagrass coverages in a shallow back-barrier estuary	2019	{"Donatelli, Carmine","Fagherazzi, Sergio","Ganju, Neil K.","Kalra, Tarandeep Singh","Leonardi, Nicoletta"}	{"Coastal Habitat"}
1976415	Effects of weight and store temperature on turion germination and seedling growth of Potamogeton crispus L.	2008	{"Shen Jia","Shi Fu-Chen","Xu Wen"}	{"Non Zostera"}
1974080	Modelling the spatial distribution of the seagrass Posidonia oceanica along the North African coast: Implications for the assessment of Good Environmental Status	2016	{"Mangin, A.","Pastres, R.","Taji, M. A.","Venier, Chiara","Zucchetta, M."}	{"Non Zostera"}
1977647	Variability in habitat use by young-of-the-year winter flounder, Pseudopleuronectes americanus, in three northeastern US estuaries	2002	{"Able, KW","Bejda, A","Calabrese, A","Clark, P","Goldberg, R","Hagan, S","Pereira, J","Phelan, B","Studholme, A"}	{"Non Seagrass"}
1976606	Isotopic and elemental indicators of nutrient sources and status of coastal habitats in the Caribbean Sea, Yucatan Peninsula, Mexico	2007	{"Dunton, Kenneth H.","Fredriksen, Stein","Mutchler, Troy","Rasser, Michael K.","Townsend-Small, Amy"}	{"Non Zostera"}
1979236	A MATHEMATICAL MODEL OF TROPHIC DYNAMICS IN ESTUARINE SEAGRASS COMMUNITIES	1979	{"ADAMS S M","FERGUSON R L"}	{"No Stressor/Restoration"}
1979237	CHANGES IN PHOSPHORUS CONCENTRATIONS IN A EUTROPHIC LAKES AS A RESULT OF MACROPHYTE-KILL FOLLOWING HERBICIDE APPLICATION	1979	{"ATCHISON, GJ","MAYES, RA","MCINTOSH, AW","MICHAUD, MT","NELSON, DW"}	{"Non Zostera"}
1972595	Genetic mosaicism and population connectivity of edge-of-range Halodule wrightii populations	2020	{"Blum, Linda","Digiantonio, Gina","McGlathery, Karen","Van Dijk, Kor-jent","Waycott, Michelle"}	{"Non Zostera"}
1973880	Short Communication: Conservation of mangrove gobies in Lesser Sunda Islands, Indonesia.	2016	{"Jaafar, Zeehan","Soewardi, Kadarwan","Suryobroto, Bambang","Zamroni, Yuliadi"}	{"Non Seagrass"}
1973594	One Health, emerging infectious diseases and wildlife: two decades of progress?	2017	{"Cunningham, Andrew A.","Daszak, Peter","Wood, James L. N."}	{"Non Seagrass"}
1972568	Soil nutrient dynamics in colonies of the yellow-legged seagull (Larus michahellis) in different biogeographical zones	2020	{"Affre, L.","De la Pena-Lastra, S.","Otero, X. L."}	{"Non Seagrass"}
1977364	Limited effects of grazer exclusion on the epiphytes of Posidonia sinuosa in South Australia	2004	{"Keuskamp, D"}	{"Non Zostera"}
1976510	Increased heavy metal and nutrient contamination does not increase fluctuating asymmetry in the seagrass Halophila ovalis	2008	{"Ambo-Rappe, Rohani","Lajus, Dmitry L.","Schreider, Matia J."}	{"Non Zostera","No Restoration Mentioned","Coastal Habitat"}
1974893	Isolation and characterization of 20 microsatellite loci for the saltmarsh plant Triglochin maritima L.	2013	{"Jump, Alistair S.","Rouger, Romuald"}	{"Non Seagrass"}
1975162	Effects of shading on Vallisneria natans (Lour.) H. Hara growth	2013	{"Cao, L.","Fox, A. D.","Meng, F.","Shen, X.","Yang, W.","Yang, X."}	{"Non Zostera","No Restoration Mentioned"}
1975589	Trophic ecology of green sea turtles in a highly urbanized bay: Insights from stable isotopes and mixing models	2011	{"Dutton, Peter","Eguchi, Tomoharu","Gaos, Alexander","Komoroske, Lisa","Lai, Chun-To","LeRoux, Robin","Lemons, Garrett","Lewison, Rebecca","Seminoff, Jeffrey A."}	{"Non Seagrass"}
1977850	Seasonality of macrophytes and interaction with flow in a New Zealand lowland stream	2000	{"Champion, PD","Tanner, CC"}	{"No Restoration Mentioned"}
1973038	The controversies of silicon's role in plant biology	2019	{"Belanger, Richard R.","Coskun, Devrim","Deshmukh, Rupesh","Kronzucker, Herbert J.","Ma, Jian Feng","Menzies, James G.","Reynolds, Olivia","Sonah, Humira"}	{"Non Seagrass"}
1976809	Herbivore vs. nutrient control of marine primary producers: Context-dependent effects	2006	{"Burkepile, Deron E.","Hay, Mark E."}	{"Non Seagrass"}
1975089	Water body ecological purification system comprises partition wall set at water body edge, and floating grass growth area and fish growth area arranged at region surrounded by partition wall and transversely or vertically isolated by net	NA	{"CHEN Y","OTHER I A N T","WANG Z"}	{"No Stressor/Restoration","No Restoration Mentioned"}
1975440	Idiosyncratic responses of seagrass phenolic production following sea urchin grazing	2012	{"Steele, LaTina","Valentine, John F."}	{"Non Zostera"}
1973673	Mechanisms causing size differences of the land hermit crab Coenobita rugosus among eco-islands in Southern Taiwan	2017	{"Hsu, Chia-Hsuan","Soong, Keryea"}	{"No Stressor/Restoration"}
1977463	Black Sea seagrasses	2003	{"Milchakova, NA","Phillips, RC"}	{"No Stressor/Restoration"}
1978578	FIELD AND GREENHOUSE INVESTIGATIONS ON WINTER BUD PRODUCTION BY POTAMOGETON-GRAMINEUS L	1994	{"ANDERSON, LWJ","KSANDER, GG","SPENCER, DF"}	{"Non Seagrass"}
1975618	Enzymatic digestion in stomachless fishes: how a simple gut accommodates both herbivory and carnivory	2011	{"Day, Ryan D.","Farr, Ingrid","German, Donovan P.","Hansen, Mitchell Jay","Manjakasy, Jennifer M.","Tibbetts, Ian R."}	{"Non Seagrass"}
1976843	Nutrient impacts on epifaunal density and species composition in a subtropical seagrass bed	2006	{"Armitage, Anna R.","Fourqurean, James W.","Gil, Melissa"}	{"Non Zostera"}
1973399	Clonal growth strategy, diversity and structure: A spatiotemporal response to sedimentation in tropical Cyperus papyrus swamps	2018	{"Geremew, Addisie","Kefalew, Alemayehu","Sierens, Tim","Stiers, Iris","Triest, Ludwig"}	{"Non Seagrass"}
1978765	PHOTOINHIBITION OF PHOTOSYNTHESIS IN MARINE MACROPHYTES OF THE SOUTH CHINA SEA	1992	{"HANELT, D"}	{"Non Zostera","No Restoration Mentioned"}
1974174	Hypersaline mangroves harbor a high density of Brazilian endangered sea stars (Echinaster spp.)	2015	{"Christoffersen, Martin Lindsey","Gondim, Anne Isabelley","Pereira Dias, Thelma Lucia"}	{"Non Seagrass","Coastal Habitat"}
1975106	Is Ocean Acidification an Open-Ocean Syndrome? Understanding Anthropogenic Impacts on Seawater pH	2013	{"Carstensen, Jacob","Duarte, Carlos M.","Hendriks, Iris E.","McCulloch, Malcolm","Moore, Tommy S.","Olsen, Ylva S.","Ramajo, Laura","Steckbauer, Alexandra","Trotter, Julie A."}	{"Non Seagrass","Non Zostera","No Restoration Mentioned","Coastal Habitat"}
1977536	Quantifying habitat utilization patterns of reef fish in US Caribbean & Hawaii Marine Protected Areas.	2003	{"Christensen, J. D.","Friedlander, A. F.","Monaco, M. E."}	{"No Stressor/Restoration"}
1972879	Using the random forest algorithm to integrate hydroacoustic data with satellite images to improve the mapping of shallow nearshore benthic features in a marine protected area in Jamaica	2019	{"McIntyre, Karen","McLaren, Kurt","Prospere, Kurt"}	{"Non Seagrass"}
1979247	NITROGEN-FIXING COMMUNITIES IN AN INTER-TIDAL ECOSYSTEM	1978	{"BOHLOOL, BB","WIEBE, WJ"}	{"Non Seagrass"}
1976332	Changes in biotic and abiotic processes following mangrove clearing	2008	{"Granek, Elise","Ruttenberg, Benjamin I."}	{"Non Zostera"}
1976817	Resource translocation within seagrass clones: allometric scaling to plant size and productivity	2006	{"Duarte, Carlos M.","Hemminga, Marten A.","Marba, Nuria"}	{"No Stressor/Restoration"}
1975823	Spatial distribution of the upside-down jellyfish Cassiopea sp. within fringing coral reef environments of the Northern Red Sea: implications for its life cycle	2010	{"Niggl, Wolfgang","Wild, Christian"}	{"Non Seagrass"}
1976457	Seasonal changes of fatty acid composition and thermotropic behavior of polar lipids from marine macrophytes	2008	{"Goncharova, Svetlana N.","Kostetsky, Eduard Y.","Sanina, Nina M."}	{"No Stressor/Restoration"}
1973817	"The Lost Princess (putri duyung)" of the Small Islands: Dugongs around Sulawesi in the Anthropocene	2017	{"Ali, Yusuf","Ambo-Rappe, Rohani","Moore, Abigail M."}	{"Non Seagrass"}
1974053	Macro-Restoration of Tidal Wetlands: A Whole Estuary Approach	2016	{"Litvin, Steven Y.","Weinstein, Michael P."}	{"Non Seagrass"}
1978144	The effect of nutrient additions on bacterial activity in seagrass (Posidonia oceanica) sediments	1998	{"Alcoverro, T","Duarte, CM","Lopez, NI","Romero, J","Vallespinos, F"}	{"Non Zostera"}
1973805	The Implicit Price of Aquatic Grasses	2017	{"Griffiths, Charles","Guignet, Dennis","Klemick, Heather","Walsh, Patrick J."}	{"No Stressor/Restoration"}
1974911	Contrasting Growth Patterns of Suspension-Feeding Molluscs (Mercenaria mercenaria, Crassostrea virginica, Argopecten irradians, and Crepidula fornicata) Across a Eutrophication Gradient in the Peconic Estuary, NY, USA	2013	{"Gobler, Christopher J.","Peterson, Bradley J.","Wall, Charles C.","Ward, J. Evan"}	{"Non Seagrass"}
1972716	Breeding, planktonic and settlement factors shape recruitment patterns of one of the last remaining major population of Pinna nobilis within Spanish waters	2020	{"Andree, Karl B.","Caiola, Nuno","Carella, Francesca","Carrasco, Noelia","Fernandez-Tejedor, Margarita","Prado, Patricia","Rafael Garcia-March, Jose","Tena, Jose","Trigos, Sergio"}	{"Non Seagrass"}
2388027	Proceedings of the forty-sixth annual meeting	1934	{"AMERICAN PHYSIOLOGICAL SOCIETY"}	{"Non Seagrass"}
1975266	Development of twenty-three novel microsatellite markers for the seagrass, Zostera muelleri from Australia	2012	{"Gardner, Michael G.","Keough, Michael J.","Macreadie, Peter I.","Sherman, Craig D. H.","Stanley, Annalise M."}	{"No Stressor/Restoration"}
1978825	A COMPARISON OF METHODS FOR DETERMINING RATES OF ACETYLENE-REDUCTION (NITROGEN-FIXATION) BY HETEROTROPHIC BACTERIA IN SEAGRASS SEDIMENT	1991	{"MACRAE, IC","MORIARTY, DJW","ODONOHUE, MJ"}	{"No Stressor/Restoration"}
1977579	Comparison Between the Energy Flow Networks of Two Habitats in the Venice Lagoon	2002	{"Giovanardi, Otello","Granzotto, Angela","Libralato, Simone","Pastres, Roberto","Pranovi, Fabio","Raicevich, Sasa","Torricelli, Patrizia"}	{"Non Zostera"}
1978620	Changes in the coastal fish communities following Hurricane Hugo in Guadeloupe Island (French West Indies)	1994	{"Bouchon, Claude","Bouchon-Navaro, Yolande","Louis, Max"}	{"Non Zostera"}
1977542	Susceptibility of the invasive seaweed Caulerpa taxifolia to ionic aluminium	2003	{"Herfort, L","Hill, G","Randone, M","Thake, B"}	{"Non Seagrass"}
1977076	Dissolved silicate in coastal marine rainwaters: Comparison between the Yellow Sea and the East China Sea on the impact and potential link with primary production	2005	{"Liu, SM","Zhang, GS","Zhang, J"}	{"Non Seagrass"}
1974979	DIVERSITY AND ASSEMBLAGE PATTERNS OF JUVENILE AND SMALL SIZED FISHES IN THE NEARSHORE HABITATS OF THE GULF OF THAILAND	2013	{"Jutagate, Tuantong","Sichum, Surasak","Tantichodok, Pitiwong"}	{"Non Seagrass"}
1975775	REGRESSION OF CYMODOCEA NODOSA SEAGRASS BEDS AT GRAN CANARIA: AN HISTORICAL PERSPECTIVE	2011	{"Espino, Fernando","Haroun, Ricardo","Hernandez-Zerpa, Harue","Tuya, Fernando"}	{"Non Zostera"}
1974974	Water hyacinth [Eichhornia crassipes (Mart.) Solms.] engineered soil nutrient availability in a low-land rain-fed rice farming system of north-east India	2013	{"Arunachalam, A.","Arunachalam, K.","Balasubramanian, D.","Das, A. K."}	{"Non Seagrass"}
1979222	PRESENT STATE OF GRASS-WRACK ZOSTERA-MARINA IN KANDALAKSHA BAY OF THE WHITE SEA RUSSIAN-SFSR USSR	1980	{"VEKHOV V N"}	{"No Stressor/Restoration"}
1977837	Seasonal trends in the Adriatic seagrass communities of Posidonia oceanica (L,) Delile, Cymodocea nodosa (Ucria) Ascherson, Zostera marina L.: Plant phenology, biomass partitioning, elemental composition and faunal features	2001	{"BE Faranda, FM","Buia, MC","Guglielmo, L","Guidetti, P","Lorenti, M","Mazzella, L","Scipione, MB","Spezie, G","Zupo, V"}	{"No Stressor/Restoration"}
1973677	Integrating ecological roles and trophic diversification on coral reefs: multiple lines of evidence identify parrotfishes as microphages	2017	{"Choat, John Howard","Clements, Kendall D.","German, Donovan P.","Piche, Jacinthe","Tribollet, Aline"}	{"Non Seagrass"}
1978347	General description of Lake Peipsi-Pihkva	1996	{"Haberman, J","Jaani, A","Laugaste, R","Lokk, S","Maemets, A","Noges, P","Noges, T","Pihu, E","Starast, H","Timm, T","Virro, T"}	{"Non Zostera","No Restoration Mentioned"}
1976861	Macrophytes in urban stream rehabilitation: Establishment, ecological effects, and public perception	2006	{"Biggs, Barry J. F.","Flanagan, Marty","Larned, Scott T.","Riis, Tenna","Suren, Alastair M."}	{"Non Seagrass"}
1974226	Illumina-based analysis the microbial diversity associated with Thalassia hemprichii in Xincun Bay, South China Sea	2015	{"Chen, Biao","Dong, Jun-De","Jiang, Yu-Feng","Ling, Juan","Wang, You-Shao","Zhang, Yan-Ying","Zhang, Yuan-Zhou"}	{"Non Zostera"}
1977033	Embrionary and larval development of Lytechinus variegatus (Echinoidea : Toxopneustidae) in laboratory conditions at Isla de Margarita-Venezuela.	2005	{"Gomez, A","Gomez, O"}	{"Non Seagrass"}
1976989	Substituting otoliths for chemical analyses: Does sagitta = lapillus?	2006	{"Jones, Cynthia M.","Smith, Nathan G."}	{"Non Seagrass"}
1973554	First description of seagrass distribution and abundance in Sao Tome and Principe	2017	{"Alexandre, Ana","Ferreira, Rogerio","Paulo, Diogo","Santos, Rui","Serrao, Ester A.","Silva, Joao"}	{"Non Zostera","No Restoration Mentioned"}
1975533	Effects of water depth on clonal characteristics and biomass allocation of Halophila ovalis (Hydrocharitaceae)	2011	{"Chen, Xiao-Yong","Deng, Hong","Tong, Xin","Tsang, Po-Kueug Eric","Xu, Na-Na"}	{"Non Zostera"}
1976320	"Water quality in the Indian River Lagoon, Florida: Relationship to the macroalgal community"	2009	{"Hanisak, M. Dennis"}	{"Non Seagrass"}
1978041	Phenolic acids and nutrient content for aquatic macrophytes from Fall River, California	1999	{"Ksander, GG","Spencer, DF"}	{"Non Seagrass"}
1976037	Using public encounter data to direct recovery efforts for the endangered smalltooth sawfish Pristis pectinata	2010	{"Simpfendorfer, Colin A.","Wiley, Tonya R."}	{"Non Seagrass"}
1978225	Seagrasses and mangroves in Moreton Bay	1998	{"Abal, Eva G.","BA Tibbetts, Ian R.","Dennison, William C.","Dennison, William C.","Hall, Narelle J.","O'Donohue, Mark H."}	{"Non Zostera"}
1974596	Mediterranean seagrass (Posidonia oceanica) loss between 1842 and 2009	2014	{"Diaz-Almela, Elena","Duarte, Carlos M.","Marba, Nuria"}	{"Non Zostera"}
1978022	Blade abandonment/proliferation: A novel mechanism for rapid epiphyte control in marine macrophytes	1999	{"Littler, DS","Littler, MM"}	{"Non Zostera"}
1974365	The soft-bottom macrofauna of Sacrificios reef lagoon, SW Gulf of Mexico	2015	{"Dominguez-Castanedo, Nayeli","Granados-Barba, Alejandro","Solis-Weiss, Vivianne"}	{"Non Zostera"}
1977157	Whole-system metabolism and CO2 fluxes in a Mediterranean Bay dominated by seagrass beds (Palma Bay, NW Mediterranean)	2005	{"Barron, C","Borges, AV","Calleja, M","Delille, B","Duarte, CM","Frankignoulle, M","Gattuso, JP","Gazeau, F","Navarro, N","Prairie, YT","Ruiz, S"}	{"Non Zostera"}
1977142	A preliminary assessment of the ecology of seagrasses at Ashmore Reef	2005	{"Brown, Kirsty","Skewes, Tim D."}	{"Non Zostera","No Restoration Mentioned"}
1977785	Management strategies for the control of eutrophication processes in Fogliano lagoon (Italy): a long-term analysis using a mathematical model	2001	{"Cioffi, F","Gallerano, F"}	{"Non Seagrass"}
1976175	Seasonal abundance, community composition, and silica content of diatoms epiphytic on Cladophora glomerata	2009	{"Hecky, Robert E.","Malkin, Sairah Y.","Sorichetti, Ryan J.","Wiklund, Johan A."}	{"Non Seagrass","Non Zostera"}
1976328	Effects of Climate Change on Fishery Species in Florida	2009	{"BE Nelson, GL","Hronszky, I","Shenker, Jonathan M."}	{"Non Zostera"}
1975130	Comparing aquatic and terrestrial grazing ecosystems: is the grass really greener?	2013	{"Burkepile, Deron E."}	{"Non Seagrass"}
1974494	Shellfish Fishery Conflicts and Perceptions of Sea Otters in California and Alaska	2015	{"BE Larson, SE","Bodkin, JL","Carswell, Lilian P.","Gill, Verena A.","Speckman, Suzann G.","VanBlaricom, GR"}	{"Non Seagrass"}
1974493	2014 site condition monitoring survey of marine sedimentary habitats in the Sound of Arisaig SAC.	2015	{"Steel, Laura"}	{"Non Seagrass"}
1974380	Intertidal biofilm distribution underpins differential tide-following behavior of two sandpiper species (Calidris mauri and Calidris alpina) during northward migration	2015	{"Elner, Robert W.","Favaro, Corinna","Jimenez, Ariam","Rickards, Karen","Ydenberg, Ronald C."}	{"Non Seagrass"}
1972586	Methane emission and sulfide levels increase in tropical seagrass sediments during temperature stress: A mesocosm experiment	2020	{"Bjork, Mats","George, Rushingisha","Gullstrom, Martin","Lyimo, Thomas J.","Mtolera, Matern S. P."}	{"Non Zostera","No Restoration Mentioned"}
1972971	45th Scientific Symposium of UJNR-Aquaculture-Panel, Hiroshima, JAPAN, October 16 -17, 2017	2019	{Anonymous}	{"Non Seagrass"}
1975827	Dependence of animal diversity on plant diversity and environmental factors in farmland ponds	2010	{"Bacaro, G.","Maccherini, S.","Mari, E.","Piazzini, S.","Renzi, M.","Santi, E."}	{"Non Seagrass"}
1976865	Slave to the tides: Spatiotemporal foraging dynamics of spring staging Black Brant	2006	{"Black, Jeffrey M.","Moore, Jeffrey E."}	{"Non Zostera"}
1974145	Strategic marine ecological research priorities for CALM Act marine parks and reserves 2016-2021	2016	{"Barnes, Peter","Bobojcov, Andre","Dasey, Matthew","Evans, Melissa","Friedman, Kim","Halford, Andrew","Holley, David","Holmes, Jarrad","Holmes, Thomas","Jennings, Paul","Kendrick, Alan","Marshall, Rachael","Mccarthy, Alison","Ossinger, Shaun","Quartermaine, Todd","Rule, Michael","Stevens, Darren","Waples, Kelly","Whiting, Scott","Wilson, Shaun"}	{"Non Seagrass"}
1977500	Lower survival probabilities for adult Florida manatees in years with intense coastal storms	2003	{"Beck, CA","Langtimm, CA"}	{"Non Seagrass"}
1978589	MODELING SEAGRASS COMMUNITIES IN TROPICAL AND SUBTROPICAL BAYS AND ESTUARIES - A MATHEMATICAL-MODEL SYNTHESIS OF CURRENT HYPOTHESES	1994	{"FONG, P","HARWELL, MA"}	{"Non Zostera"}
1976754	Mortality of shoots of Posidionia oceanica following meadow invasion by the red alga Lophociadia lallemandii	2007	{"Alcoverro, Teresa","Ballesteros, Enric","Cebrian, Emma"}	{"Non Zostera","No Stressor/Restoration","No Restoration Mentioned"}
1975800	Ecological Stoichiometry, Biogeochemical Cycling, Invasive Species, and Aquatic Food Webs: San Francisco Estuary and Comparative Systems	2011	{"Burkholder, Joann M.","Cornwell, Jeffrey C.","Fullerton, David","Glibert, Patricia M.","Kana, Todd M."}	{"Non Seagrass"}
1975559	Variation in nutrient limitation and seagrass nutrient content in Bahamian tidal creek ecosystems	2011	{"Allgeier, Jacob E.","Layman, Craig A.","Rosemond, Amy D."}	{"Non Zostera"}
1975622	Comparison of the role of the foliar sheath in nutrient (ammonium and phosphate) acquisition by the seagrass Thalassia hemprichii (Ehrenb.) Aschers. at two different sites on tropical Hainan Island, China	2011	{"Huang, Xiao-Ping","Jiang, Zhi-Jian","Thorhaug, Anitra","Zhang, Jing-Ping"}	{"Non Zostera"}
1977510	Development and evaluation of statistical habitat suitability models: an example based on juvenile spotted seatrout Cynoscion nebulosus	2003	{"Kupschus, S"}	{"Non Seagrass"}
1974943	Resilience and stability of Cymodocea nodosa seagrass meadows over the last four decades in a Mediterranean lagoon	2013	{"Fernandez, Catherine","Garrido, Marie","Lafabrie, Celine","Pasqualini, Vanina","Torre, Franck"}	{"Non Zostera"}
1978569	HYDROLOGIC CONTROL OF LITTER DECOMPOSITION IN SEASONALLY FLOODED PRAIRIE MARSHES	1994	{"NECKLES, HA","NEILL, C"}	{"Non Seagrass"}
1977864	Growth, photosynthesis and nutrient content of seedlings and mature plants of Cymodocea nodosa - the importance of clonal integration	2000	{"Nielsen, SL","Pedersen, MF"}	{"Non Seagrass"}
1975644	Gradients in the Number of Species at Reef-Seagrass Ecotones Explained by Gradients in Abundance	2011	{"Thomsen, Mads S.","Tuya, Fernando","Vanderklift, Mathew A.","Wernberg, Thomas"}	{"Non Zostera","No Restoration Mentioned"}
1978078	Critical assessment of Thalassia testudinum (turtle grass) aging techniques: implications for demographic inferences	1999	{"Dunton, KH","Fowler, N","Kaldy, JE"}	{"Non Zostera","No Stressor/Restoration"}
1977052	Anthropogenic enrichment alters a marine benthic food web	2005	{"McCann, KS","Rasmussen, JB","Tewfik, A"}	{"Non Zostera"}
1974225	Cultivation-dependent analysis of the microbial diversity associated with the seagrass meadows in Xincun Bay, South China Sea	2015	{"Chen, Biao","Dong, Jun-De","Jiang, Yu-Feng","Ling, Juan","Wang, You-Shao","Zhang, Yan-Ying"}	{"Non Zostera"}
1977602	Clonal diversity and structure within a population of the pondweed Potamogeton pectinatus foraged by Bewick's swans	2002	{"Hangelbroek, HH","Ouborg, NJ","Santamaria, L","Schwenk, K"}	{"Non Seagrass"}
1975247	Friend or foe: the association of Labyrinthulomycetes with the Caribbean sea fan Gorgonia ventalina	2012	{"Burge, Colleen A.","Conti-Jerpe, Inga","Douglas, Nancy","Friedman, Carolyn S.","Harvell, C. Drew","Roberts, Steven","Weil, Ernesto"}	{"Non Seagrass"}
1975467	Responses of loggerhead sponges Spechiospongia vesparium during harmful cyanobacterial blooms in a sub-tropical lagoon	2012	{"Gobler, Christopher J.","Peterson, Bradley J.","Rodgers, Brooke S.","Wall, Charles C."}	{"Non Seagrass"}
1978080	Microbial nutrient cycling in seagrass sediments	1999	{"Dennison, William C.","Perry, Christine J."}	{"No Stressor/Restoration"}
1974132	Mini-review: Biofilm responses to oxidative stress	2016	{"Cappitelli, Francesca","Gambino, Michela"}	{"Non Seagrass"}
1976693	Biochemical responses of the aquatic moss Fontinalis antipyretica to Cd, Cu, Pb and Zn determined by chlorophyll fluorescence and protein levels	2007	{"Krauss, G-J","Miersch, J.","Neumann, D.","Rau, S.","Weber, E."}	{"Non Seagrass"}
1976461	Modelling ecosystem functions and properties at different time and spatial scales in shallow coastal lagoons: An application of the LOICZ biogeochemical model	2008	{"Austoni, Martina","Giordani, Gianmarco","Swaney, Dennis P.","Viaroli, Pierluigi","Zaldivar, Jose M."}	{"Non Seagrass"}
1976085	Macrophyte assemblage associated with an invasive species exhibiting temporal variability in its development pattern	2009	{"Klein, Judith C.","Verlaque, Marc"}	{"Non Seagrass"}
1972892	Species-specific distribution of intertidal seagrasses along environmental gradients in a tropical estuary (Brunei Bay, Borneo)	2019	{"Lamit, Nadhirah","Tanaka, Yasuaki"}	{"Non Zostera","No Stressor/Restoration","No Restoration Mentioned"}
1976033	Chlorphyll a Fluorescence in Aquatic Sciences: Methods and Applications	2010	NA	{"No Stressor/Restoration"}
1977115	A comparison of selected ecosystem attributes of three South African estuaries with different freshwater inflow regimes, using network analysis	2005	{"Baird, D","Scharler, UM"}	{"Non Seagrass"}
1975967	Submerged macrophytes as indicators of the ecological quality of lakes	2010	{"Jeppesen, Erik","Johansson, Liselotte S.","Jorgensen, Torben B.","Lauridsen, Torben L.","Liboriussen, Lone","Sondergaard, Martin"}	{"Non Zostera"}
1975742	Diel movements of fishes linked to benthic seascape structure in a Caribbean coral reef ecosystem	2011	{"Hitt, Steven","Nemeth, Richard S.","Pittman, Simon J."}	{"No Stressor/Restoration","Coastal Habitat"}
1977657	The influence of freshwater runoff on biomass, morphometrics, and production of Thalassia testudinum	2002	{"Biber, P","Irlandi, E","Jones, T","Kaufman, L","Lirman, D","Macia, S","Orlando, B","Patterson, E"}	{"Non Zostera"}
1977875	Determination of arsenic in seagrass using inductively coupled plasma mass spectrometry	2000	{"Cai, Y","Fourqurean, JW","Georgiadis, M"}	{"Non Zostera"}
1977215	Linking integrated water resources management and integrated coastal zone management	2005	{"Ipsen, N","Malmgren-Hansen, A","Mogensen, B","Rasch, PS"}	{"Non Seagrass"}
2388029	The natural history of Cumingia tellinoides	1927	{"Grave, BH"}	{"Non Seagrass","Non Zostera","No Stressor/Restoration","No Restoration Mentioned"}
1974926	Trace element (Al, As, B, Ba, Cr, Mo, Ni, Se, Sr, Tl, U and V) distribution and seasonality in compartments of the seagrass Cymodocea nodosa	2013	{"Kevrekidis, Theodoros","Malea, Paraskevi"}	{"Non Zostera"}
1972865	Relative Contributions of DNRA and Denitrification to Nitrate Reduction in Thalassia testudinum Seagrass Beds in Coastal Florida (USA)	2019	{"Gao, Juan","Gardner, Wayne S.","Hoffman, Daniel K.","McCarthy, Mark J.","Mutchler, Troy R.","Newell, Silvia E.","Niewinski, Desi N."}	{"Non Zostera"}
1979242	PERSISTENCE OF A SEASONAL GROWTH RHYTHM IN POSIDONIA-OCEANICA (L) DELILE UNDER CONSTANT CONDITIONS OF TEMPERATURE AND ILLUMINATION	1979	{"OTT, JA"}	{"Non Zostera"}
1974303	Attributes of the earthquake-uplifted intertidal habitats and their implications to the Maribojoc and Loon coastal fisheries	2015	{"Albano, Giannina Marie G.","Rollon, Rene N.","Samson, Maricar S.","Siringan, Fernando P.","Villamayor, Betty May R."}	{"Non Zostera"}
1978042	Seasonal variation of particulate organic carbon, dissolved organic carbon and the contribution of microbial communities to the live particulate organic carbon in a shallow near-bottom ecosystem at the Northwestern Mediterranean Sea	1999	{"Coma, R","Gill, JM","Ribes, M"}	{"Non Seagrass","Non Zostera"}
1972849	Increase in Fish Production Through Bottom-Up Trophic Linkage in Coastal Waters Induced by Nutrients Supplied via Submarine Groundwater	2019	{"Fujita, Koji","Honda, Hisami","Nakajima, Toshimi","Shoji, Jun","Sugimoto, Ryo","Takeuchi, Masaru","Taniguchi, Makoto","Tominaga, Osamu"}	{"Non Seagrass"}
1975905	Degrading seagrass (Posidonia oceanica) ecosystems: a source of dissolved matter in the Mediterranean	2010	{"Apostolaki, Eugenia T.","Holmer, Marianne","Karakassis, Ioannis","Marba, Nuria"}	{"Non Zostera"}
1974535	Ontogenetic and sex-based differences in habitat preferences and site fidelity of White's seahorse Hippocampus whitei	2014	{"Gladstone, W.","Harasti, D.","Martin-Smith, K."}	{"Non Seagrass"}
1973528	The effect of storage condition on seed germination of six Hydrocharitaceae and Potamogetonaceae species	2017	{"Li, Wei","Liu, Yang","Wang, Caiyun","Yin, Liyan","Zhang, Ruifen","Zhao, Suting"}	{"Non Seagrass"}
1977037	Lake Worth Lagoon conceptual ecological model	2005	{"Crigger, DK","Fike, DL","Graves, GA"}	{"Non Seagrass"}
1976565	High metabolic rates in beach cast communities	2007	{"Coupland, Grey T.","Duarte, Carlos M.","Walker, Diana I."}	{"Non Seagrass"}
1972610	Influence of the seagrass Thalassia hemprichii on coral reef mesocosms exposed to ocean acidification and experimentally elevated temperatures	2020	{"Ang, Shin-Jing","Lin, Hsing-Juh","Liu, Pi-Jen","Mayfield, Anderson B."}	{"Non Zostera"}
1974251	Pumpkin nutrient cherry fruit wine and preparation method comprises pumpkin, cherry, etc	NA	{"WANG Y"}	{"Non Seagrass","Non Zostera","No Stressor/Restoration","No Restoration Mentioned","Coastal Habitat"}
1976527	Using the landscape morphometric context to resolve spatial patterns of submerged macrophyte communities in a fluvial lake	2008	{"Bouchard, Andre","Jean, Martin","Legendre, Pierre","Leonard, Rosalie"}	{"Non Seagrass"}
1978040	An experimental test of the capacity of food web interactions (fish-epiphytes-seagrasses) to offset the negative consequences of eutrophication on seagrass communities	1999	{"Gacia, E","Littler, DS","Littler, MM"}	{"Non Zostera"}
1977747	Effects of fish farm loadings on seagrass (Posidonia oceanica) distribution, growth and photosynthesis	2001	{"Perez, M","Romero, J","Ruiz, JM"}	{"Non Zostera"}
1977561	Natural water-purification system observed in a shallow coastal lagoon: Matsukawa-ura, Japan	2003	{"Hagiwara, T","Hiwatari, T","Kohata, K"}	{"No Stressor/Restoration"}
1975044	Succession of aquatic macrophytes in the Modern Yellow River Delta after 150 years of alluviation	2013	{"Chen, Xinsheng","Deng, Zhengmiao","Hou, Zhiyong","Hu, Jiayu","Li, Feng","Li, Xu","Liu, Na","Liu, Yinyin","Xie, Yonghong"}	{"Non Zostera"}
1973929	Temporal and spatial variation of dissolved organic matter and its controlling factors in seagrass bed ecosystem of Xincun Bay, Hainan Island	2016	{"Gan Mao-lin","Huang Xiao-ping","Jiang Zhi-jian","Liu Song-lin","Wu Yun-chao","Zhang Jing-ping","Zhou Chen-yuan"}	{"Non Zostera"}
1978735	ECOLOGY OF SEAGRASSES IN NORTHEASTERN SAUDI-ARABIA ONE-YEAR AFTER THE GULF-WAR OIL-SPILL	1993	{"DURAKO, MJ","FATEMY, SMR","KENWORTHY, WJ","THAYER, GW","VALAVI, H"}	{"Non Zostera"}
1977830	Sensitivity of freshwater macrophytes to UV radiation: relationship to depth zonation in an oligotrophic New Zealand lake	2001	{"Hanelt, D","Hawes, I","Rae, R"}	{"Non Zostera"}
1973495	Sulfide Generated by Sulfate Reduction is a Primary Controller of the Occurrence of Wild Rice (Zizania palustris) in Shallow Aquatic Ecosystems	2017	{"Blaha, G.","Brenner, J.","Engstrom, D. R.","Myrbo, A.","Peters, E. B.","Shore, M. Dykhuizen","Swain, E. B.","Wasik, J. Coleman"}	{"Non Seagrass"}
1977118	Modelling the interactions between nutrients and the submersed vegetation in the Orbetello Lagoon	2005	{"Giusti, E","Marsili-Libelli, S"}	{"Non Seagrass"}
1974758	Changes in a coral reef fishery along a gradient of fishing pressure in an Indonesian marine protected area	2014	{"Campbell, S. J.","Cinner, J. E.","Huchery, C.","Kartawijaya, T.","Mukminin, A."}	{"Non Seagrass"}
1978785	POTENTIAL USE OF BENSULFURON METHYL FOR SEDIMENT APPLICATION IN IRRIGATION SYSTEMS IN AUSTRALIA	1992	{"BOWMER, KH","MCCORKELLE, G","SAINTY, GR"}	{"Non Zostera"}
1978823	PARTICULATE ORGANIC-CARBON, NITROGEN AND PHOSPHORUS-CONTENT IN ROOTS, RHIZOMES AND DIFFERENTLY AGED LEAVES OF ZOSTERA-NOLTII HORNEM IN OOSTERSCHELDE ESTUARY (SOUTHWESTERN NETHERLANDS)	1991	{"MUCHTAR, M","NIELL, FX","NIENHUIS, PH","PEREZLLORENS, JL"}	{"No Stressor/Restoration"}
1976680	Endpoint 'floating leaves' of Potamogeton natans: A new method to evaluate the development of macrophytes in pond mesocosms	2007	{"Berghahn, Ruediger","Feibicke, Michael","Meinecke, Stefan","Mohr, Silvia","Sperfeld, Erik"}	{"No Stressor/Restoration"}
1977860	Influence of the smalt intertidal seagrass Zostera novazelandica on linear water flow and sediment texture	2000	{"Heiss, WM","Probert, PK","Smith, AM"}	{"No Stressor/Restoration"}
1974858	Posidonia oceanica habitat loss and changes in litter-associated biodiversity organization: A stable isotope-based preliminary study	2013	{"Bentivoglio, Flavia","Calizza, Edoardo","Carlino, Pasquale","Costantini, Maria Letizia","Orlandi, Lucia","Rossi, Loreto"}	{"Non Zostera"}
1972934	Salinity stress drives herbivory rates and selective grazing in subtidal seagrass communities	2019	{"Bell, Sahira Y.","Fraser, Matthew W.","Kendrick, Gary A.","Statton, John"}	{"Non Zostera"}
1976243	The bay scallop, Argopecten irradians, in Florida coastal waters.	2009	{"Arnold, William S."}	{"Non Seagrass","Coastal Habitat"}
1977571	A review of water quality and pollution studies in Tanzania	2002	{"Mohammed, SM"}	{"Non Seagrass"}
1976390	The impact of Hurricane Ivan on the primary productivity and metabolism of marsh tidal creeks in the North Central Gulf of Mexico	2008	{"Anton, Andrea","Cebrian, Just","Foster, C. Drew","Heck, Kenneth L., Jr.","Major, Kelly","Miller, Mary-Elizabeth C.","Plutchak, Rochelle","Powers, Sean P.","Sheehan, Kate L."}	{"Non Seagrass"}
1975232	Cost assessment of environmental regulation and options for marine operators	2012	{"Schinas, O.","Stefanakos, Ch N."}	{"Non Seagrass"}
1977462	Nutrient limitation of Zannichellia palustris and Elodea canadensis growing in sediments from Fall River, California	2003	{"Ksander, G","Spencer, D"}	{"Non Seagrass"}
1974643	Benthic Exchange of C, N, and P Along the Estuarine Ecotone of Lower Taylor Slough, Florida (USA): Effect of Seasonal Flows and Phosphorus Availability	2014	{"Davis, Stephen E., III","Li, Hsiu Ping","Liu, Kung Jen"}	{"Non Seagrass"}
1976550	SEAGRASS HABITATS	2008	{"BA Capone, DG","Bronk, DA","Carpenter, EJ","McGlathery, Karen J.","Mulholland, MR"}	{"No Stressor/Restoration"}
1972618	Contrasted habitats and individual plasticity drive the fine scale movements of juvenile green turtles in coastal ecosystems	2020	{"Ballorain, Katia","Bourjea, Jerome","Chambault, Philippine","Ciccione, Stephane","Dalleau, Mayeul","Jean, Claire","Mouquet, Pascal","Nicet, Jean-Benoit"}	{"Non Zostera"}
1979292	SOME ASPECTS OF HERBIVORE PLANT RELATIONSHIPS ON CARIBBEAN REEFS AND SEAGRASS BEDS	1976	{"OGDEN J C"}	{"No Stressor/Restoration"}
1974454	Mangroves and Their Environment	2015	{"BA Hogarth, PJ","Hogarth, Peter J."}	{"Non Seagrass","Coastal Habitat"}
1975379	Paleoreconstruction of estuarine sediments reveal human-induced weakening of coastal carbon sinks	2012	{"Allen, Katie","Kelaher, Brendan P.","Macreadie, Peter I.","Ralph, Peter J.","Skilbeck, Charles G."}	{"Non Seagrass"}
1978899	WHICH ENVIRONMENTAL CHANGES ARE INDICATED BY WATERFOWL ON THE SWEDISH WEST COAST?	1990	{"PEHRSSON O"}	{"Non Seagrass"}
1978801	EFFECT OF TRIPLOID GRASS CARP ON SUBMERSED AQUATIC PLANTS IN NORTHERN CALIFORNIA PONDS	1991	{"ANDERSON, LWJ","PINE, RT"}	{"Non Seagrass"}
1974035	Light Levels Affect Carbon Utilisation in Tropical Seagrass under Ocean Acidification	2016	{"Collier, Catherine J.","Ow, Yan X.","Uthicke, Sven"}	{"Non Zostera"}
1978548	INDUCED PHOTOMORPHOGENESIS BY AN ALTERED R-FR LIGHT RATIO IN AXENIC RUPPIA-MARITIMA L	1994	{"DURAKO, MJ","ROSE, CD"}	{"Non Zostera"}
1978925	METAL AND NUTRIENT CONCENTRATION IN FLORIDA BAY USA SEDIMENTS	1989	{"LEWIS F G III","RYAN J D","SCHROPP S J"}	{"Non Seagrass"}
1976324	Ecosystem quality and natural heritage preservation: the case of the littoral eutrophication and the wintering of Brent Geese Branta b. bernicla in the bay of Saint-Brieuc (France)	2009	{"Allain, Jeremy","Le Mao, Patrick","Ponsero, Alain","Vidal, Justine","Yesou, Pierre"}	{"Non Seagrass"}
1977734	Variability in detritus stocks in beds of the seagrass Cymodocea nodosa	2001	{"Alcoverro, T","Mateo, MA","Perez, M","Romero, J"}	{"Non Zostera"}
1972480	Organic Carbon and Carbonate System in the Bottom Sediments of Shallow Bights of the Peter the Great Bay (Sea of Japan)	2020	{"Barabanshchikov, Yu A.","Medvedev, E. V.","Orekhova, N. A.","Pavlova, G. Yu","Sagalaev, S. G.","Shkirnikova, E. M.","Shvetsova, M. G.","Tibenko, E. Yu","Tishchenko, P. P.","Tishchenko, P. Ya","Ulanova, O. A."}	{"Coastal Habitat"}
1973559	Seasonal and Annual Dynamics in Seagrass Beds of the Grand Bay National Estuarine Research Reserve, Mississippi	2017	{"Biber, P. D.","Cho, H. J.","Darnell, K. M.","Dunton, K. H."}	{"Non Zostera","No Restoration Mentioned"}
1976650	Simplification of seagrass food webs across a gradient of nutrient enrichment	2007	{"McCann, Kevin S.","Rasmussen, Joseph. B.","Tewfik, Alexander"}	{"Non Zostera"}
1973405	Characteristics of the habitat in the nursery area of the spiny lobster Panulirus argus eastern of the Isle of Youth, Cuba.	2018	{"Betanzos Vega, Abel","Capetillo-Pinar, Norberto","Lopeztegui Castillo, Alexander","Martinez-Daranas, Beatriz"}	{"Non Seagrass"}
1973078	MUSEUM COLLECTIONS YIELD INFORMATION ON NITROGEN SOURCES FOR COASTAL GULF OF MEXICO, NORTH CAROLINA, AND CARIBBEAN SEA INVERTEBRATES, 1850 TO 2004	2018	{"Baker, David","Kim, Kiho","Kwon, Min Jung","Macavoy, Stephen E.","Tudge, Chris"}	{"Non Seagrass"}
1972677	Environmentally relevant bisphenol A concentrations effects on the seagrass Cymodocea nodosa different parts elongation: perceptive assessors of toxicity	2020	{"Adamakis, Ioannis-Dimosthenis S.","Kevrekidou, Alkistis","Kokkinidi, Danae","Malea, Paraskevi"}	{"Non Zostera"}
1973688	Combined effects of temperature and the herbicide diuron on Photosystem II activity of the tropical seagrass Halophila ovalis	2017	{"Collier, Catherine J.","Flores, Florita","Langlois, Lucas","Negri, Andrew P.","Ralph, Peter J.","Wilkinson, Adam D."}	{"Non Zostera"}
1974957	Development of 10 novel polymorphic microsatellite markers for the Indo-Pacific horned starfish, Protoreaster nodosus	2013	{"Arriesgado, Dan M.","Campos, Wilfredo L.","Fortes, Miguel D.","Lian, Chunlan","Matsuki, Yu","Nadaoka, Kazuo","Nagai, Satoshi","Nakajima, Yuichi","Nakaoka, Masahiro",Suharsono,"Taquet, Coralie","Uy, Wilfredo H.","Yasuda, Nina"}	{"Non Seagrass"}
1975834	Habitat use of a multispecific seagrass meadow by green turtles Chelonia mydas at Mayotte Island	2010	{"Ballorain, Katia","Bourjea, Jerome","Ciccione, Stephane","Enstipp, Manfred","Georges, Jean-Yves","Grizel, Henri"}	{"No Stressor/Restoration"}
1976913	Variability of Ruppia cirrhosa in two coastal lagoons with differing anthropogenic stresses	2006	{"Fernandez, C","Ferrat, L","Pasqualini, V","Pergent, G","Pergent-Martini, C"}	{"Non Zostera"}
1974127	Living shorelines can enhance the nursery role of threatened estuarine habitats	2016	{"Bruno, John F.","Currin, Carolyn A.","Fodrie, F. Joel","Gittman, Rachel K.","Peterson, Charles H.","Piehler, Michael F."}	{"Non Seagrass"}
1973792	Temporal variability in assimilation of basal food sources by an omnivorous fish at Patos Lagoon Estuary revealed by stable isotopes (2010-2014)	2017	{"Claudino, Marlucy Coelho","Copertino, Margareth","Garcia, Alexandre M.","Mont'Alverne, Renata","Rubira Pereyra, Paula Evelyn","Vieira, Joao Paes"}	{"No Stressor/Restoration"}
1974956	INFLUENCE OF DIFFERENT SALT MARSH PLANTS ON HYDROCARBON DEGRADING MICROORGANISMS ABUNDANCE THROUGHOUT A PHENOLOGICAL CYCLE	2013	{"Almeida, C. Marisa R.","Bordalo, Adriano A.","Mucha, Ana Paula","Ribeiro, Hugo"}	{"Non Seagrass"}
1973383	Under the canopy: Community-wide effects of invasive algae in Marine Protected Areas revealed by metabarcoding	2018	{"Cebrian, Emma","Palacin, Creu","Turon, Xavier","Wangensteen, Owen S."}	{"Non Seagrass"}
1976620	Recruitment of Posidonia oceanica on rubble mounds: Substratum effects on biomass partitioning and leaf morphology	2007	{"Badalamenti, F.","Di Carlo, G.","Terlizzi, A."}	{"Non Zostera"}
1975327	Patterns of spatial variation of nutrient content, epiphyte load and shoot size of Posidonia oceanica seagrass meadows (Mediterranean Sea)	2012	{"Castejon-Silvo, Ines","Terrados, Jorge"}	{"Non Zostera","No Restoration Mentioned"}
1977932	Above- and below-ground production, biomass and reproductive ecology of Thalassia testudinum (turtle grass) in a subtropical coastal lagoon	2000	{"Dunton, KH","Kaldy, JE"}	{"Non Zostera"}
1974141	Large-Scale Prediction of Seagrass Distribution Integrating Landscape Metrics and Environmental Factors: The Case of Cymodocea nodosa (Mediterranean-Atlantic)	2016	{"Assis, Jorge","Chefaoui, Rosa M.","Duarte, Carlos M.","Serrao, Ester A."}	{"Non Zostera"}
1977614	Adaptations of tropical marine microphytobenthic assemblages along a gradient of light and nutrient availability in Suva Lagoon, Fiji	2002	{"Underwood, GJC"}	{"Non Seagrass"}
1974028	Cymodocea nodosa metrics as bioindicators of anthropogenic stress in N. Aegean, Greek coastal waters	2016	{"Brown, Murray T.","Orfanidis, Sotiris","Papathanasiou, Vasillis"}	{"Non Zostera"}
1975608	Typhoon-induced precipitation impact on nutrient and suspended matter dynamics of a tropical estuary affected by human activities in Hainan, China	2011	{"Herbeck, Lucia S.","Jennerjahn, Tim C.","Krumme, Uwe","Liu, Su Mei","Unger, Daniela"}	{"Non Zostera"}
1978137	Effects of habitat alteration on blue crabs	1998	{"Engel, DW","Thayer, GW"}	{"Non Seagrass"}
1978947	ASSESSMENT OF FISHERIES HABITAT NORTHEAST FLORIDA USA	1988	{"DURAKO M J","HADDAD K D","MURPHY M D"}	{"Non Seagrass"}
1975879	Guiding ecological principles for marine spatial planning	2010	{"Armsby, Matthew H.","Beck, Michael W.","Caldwell, Margaret R.","Carr, Mark H.","Crain, Caitlin M.","Crowder, Larry B.","Duffy, J. Emmett","Foley, Melissa M.","Hacker, Sally D.","Halpern, Benjamin S.","McLeod, Karen L.","Micheli, Fiorenza","Palumbi, Stephen R.","Peterson, Charles H.","Prahler, Erin","Regan, Helen M.","Rohr, Nicole","Ruckelshaus, Mary H.","Sandifer, Paul A.","Sivas, Deborah","Ste…	{"Non Seagrass"}
1975344	Trophic cascade induced by molluscivore predator alters pore-water biogeochemistry via competitive release of prey	2012	{"Govers, Laura L.","Jansen, Erik J.","Piersma, Theunis","de Fouw, Jimmy","van Gils, Jan A.","van der Geest, Matthijs"}	{"Non Seagrass"}
1974988	What Drives Ontogenetic Niche Shifts of Fishes in Coral Reef Ecosystems?	2013	{"Blankers, P.","Hoeijmakers, D.","Huijbers, C. M.","Kimirei, I. A.","Mgaya, Y. D.","Nagelkerken, I.","Rypel, A. L.","Trommelen, M.","van Hoytema, N."}	{"Non Seagrass"}
1977922	An introduction to the chemistry of the water column of the Knysna Estuary with particular reference to nutrients and suspended solids	2000	{"Allanson, BR","Grange, N","Maree, B"}	{"Non Seagrass"}
1977783	Entrapment of pollutants in Mediterranean sediments and biogeochemical indicators of their impact	2001	{"Chisholm, JRM","Fernex, FE","Migon, C"}	{"Non Zostera"}
1974156	Strategy for assessing impacts in ephemeral tropical seagrasses	2015	{"Fraser, Matthew W.","Hovey, Renae K.","Kendrick, Gary A.","Rees, Max","Ruiz-Montoya, Leonardo","Statton, John","Stoddart, James","Zavala-Perez, Andrea"}	{"Non Zostera"}
1977791	Solid-phase phosphorus pools in highly organic carbonate sediments of northeastern Florida Bay	2001	{"Benz, RE","Koch, MS","Rudnick, DT"}	{"Non Zostera"}
1975245	Invertebrate response to nutrient-driven epiphytic load increase in Posidonia oceanica meadows	2012	{"Castejon-Silvo, Ines","Dominguez, Marta","Morales-Nin, Beatriz","Terrados, Jorge","Tomas, Fiona"}	{"Non Zostera","No Restoration Mentioned"}
1975102	Dynamics of Nutrient Contents (Phosphorus, Nitrogen) in Water, Sediment and Plants After Restoration of Connectivity in Side-Channels of the River Rhine	2013	{"Combroux, Isabelle","Meyer, Albin","Tremolieres, Michele"}	{"Non Seagrass"}
1978746	FOLIAR RELEASE OF SOLUBLE REACTIVE PHOSPHORUS FROM SPARTINA-ALTERNIFLORA IN A GEORGIA (USA) SALT-MARSH	1992	{"PAKULSKI, JD"}	{"Non Zostera"}
1974485	Short-term impacts of salinity pulses on ionic ratios of the seagrasses Thalassia testudinum and Halodule wrightii	2015	{"Cebrian, Just","Garrote-Moreno, Aurora","Heck, Kenneth L., Jr.","Luis Sanchez-Lizaso, Jose","McDonald, Ashley","Sherman, Timothy D."}	{"Non Zostera"}
1977010	Oxygen movement in seagrasses	2006	{"BE Larkum, AW","Binzer, Thomas","Borum, Jens","Duarte, CM","Greve, Tina Maria","Orth, RJ","Pedersen, Ole","Sand-Jensen, Kaj"}	{"No Stressor/Restoration","No Restoration Mentioned"}
1973036	Habitat function of seagrass ecosystem for megabentos diversity in Teluk Bakau, North Bintan, Indonesia	2019	{"Adrianto, L","Arkam, MN","BE Damar, A","Bengen, DG","Dahuri, R","Fahrudin, A","Idris, F.","Karlina, I","Kurniawan, F","Kusumastanto, T",Nurjanah,"Suwandi, R","Syakti, AD","Tarman, K","Wahyudin, Y"}	{"Non Zostera","No Restoration Mentioned"}
1979096	PHENOLOGY OF EELGRASS, ZOSTERA-MARINA L, ALONG LATITUDINAL GRADIENTS IN NORTH-AMERICA	1983	{"BRIDGES, KW","MCMILLAN, C","PHILLIPS, RC"}	{"No Stressor/Restoration"}
1976231	NUTRIENT LIMITATION AND PRODUCTIVITY OF PHYTOPLANKTON IN THE LOWER LAGUNA MADRE, TEXAS	2009	{"DeYoe, H.","Pardo, N. A."}	{"Non Seagrass"}
1977615	Plant response to solar ultraviolet-B radiation in a southern South American Sphagnum peatland	2002	{"Ballare, CL","Caldwell, MM","Diaz, SB","Flint, SD","Rousseaux, MC","Searles, PS"}	{"Non Seagrass"}
1976070	Light reductions drive macroinvertebrate changes in Amphibolis griffithii seagrass habitat	2010	{"Barwick, H.","Brearley, A.","Gartner, A.","Lavery, P. S.","McMahon, K."}	{"Non Zostera"}
1975610	An assessment of ocean margin anaerobic processes on oceanic alkalinity budget	2011	{"Cai, Wei-Jun","Hu, Xinping"}	{"No Stressor/Restoration"}
1975334	Colonization of Bryozoa on seagrass Posidonia oceanica 'mimics': biodiversity and recruitment pattern over time	2012	{"Ciuffardi, Federica","Cocito, Silvia","Gambi, Maria Cristina","Lombardi, Chiara"}	{"Non Zostera"}
1978455	VARIABILITY OF INVERTEBRATE HERBIVORY ON THE SUBMERGED MACROPHYTE POTAMOGETON PERFOLIATUS	1995	{"JACOBSEN, D","SANDJENSEN, K"}	{"Non Zostera","Coastal Habitat"}
1974736	Pyropia yezoensis can utilize CO2 in the air during moderate dehydration	2014	{"He Linwen","Lin Apeng","Niu Jianfeng","Wang Guangce","Yang Fang","Zhang Baoyu","Zhou Wei"}	{"Non Seagrass"}
1974291	Seagrass meadows (Posidonia oceanica) distribution and trajectories of change	2015	{"Alagna, Adriana","Apostolaki, Eugenia T.","Ardizzone, Giandomenico","Badalamenti, Fabio","Belluscio, Andrea","Criscoli, Alessandro","Fraschetti, Simonetta","Garofalo, Germana","Gerakaris, Vasilis","Gristina, Michele","Knittweis, Leyla","Martin, Corinne S.","Pace, Marie Louise","Pergent, Gerard","Pergent-Martini, Christine","Salomidi, Maria","Telesca, Luca"}	{"Non Zostera"}
1974320	Sub-tropical seagrass ecosystem metabolism measured by eddy covariance	2015	{"Berg, Peter","Long, Matthew H.","McGlathery, Karen J.","Zieman, Joseph C."}	{"Non Zostera"}
1974449	Population structure of marine turtles in coastal waters of Qatar	2015	{"Al-Maslamani, Ibrahim","Chikhi, Ahmed","Gasang, Reyniel","Pilcher, Nicolas J.","Williams, James"}	{"Non Seagrass"}
1973568	Global and local disturbances interact to modify seagrass palatability	2017	{"Brun, Fernando G.","Egea, Luis G.","Hernandez, Ignacio","Jimenez-Ramos, Rocio","Ortega, Maria J.","Vergara, Juan J."}	{"Non Zostera"}
1977499	Potential for estimating macrophyte surface area from biomass	2003	{"Armstrong, N","Planas, D","Prepas, E"}	{"Non Seagrass"}
1976105	The importance of herbivory in the decline of a seagrass (Posidonia oceanica) meadow near a fish farm: an experimental approach	2009	{"Perez, Marta","Romero, Javier","Ruiz, Juan M.","Tomas, Fiona"}	{"Non Zostera"}
1978634	HERBIVORY ON SHOALGRASS BY WINTERING REDHEADS IN TEXAS	1994	{"CUSTER, TW","MITCHELL, CA","ZWANK, PJ"}	{"Non Seagrass"}
1972717	Expansin gene loss is a common occurrence during adaptation to an aquatic environment	2020	{"Bowman, Alexa","Carey, Robert E.","Cosgrove, Daniel J.","Hepler, Nathan K."}	{"No Stressor/Restoration"}
1975566	Efficacy of Zosteric Acid Sodium Salt on the Yeast Biofilm Model Candida albicans	2011	{"Albanese, Domenico","Cappitelli, Francesca","Giordano, Carmen","Giussani, Barbara","Pitts, Betsey","Roncoroni, Simone","Stewart, Philip S.","Tunesi, Marta","Villa, Federica"}	{"Non Seagrass"}
1974932	Can artificial holdfast units work as a habitat restoration tool for long-snouted seahorse (Hippocampus guttulatus Cuvier)?	2013	{"Andrade, Jose Pedro","Correia, Miguel","Koldewey, Heather","Palma, Jorge"}	{"Non Seagrass","Non Zostera","No Stressor/Restoration","No Restoration Mentioned","Coastal Habitat"}
1975027	Valuing the European 'coastal blue carbon' storage benefit	2013	{"Jackson, E. L.","Luisetti, T.","Turner, R. K."}	{"No Stressor/Restoration"}
1978594	ESTIMATING THE IMPACT OF TRIPLOID GRASS CARP ON SAGO PONDWEED IN THE BYRNES CANAL - IMPLICATIONS FOR BIOLOGICAL-CONTROL IN NORTHERN CALIFORNIA IRRIGATION SYSTEMS	1994	{"SPENCER, DF"}	{"Non Seagrass"}
1975007	Posidonia oceanica genetic and biometry mapping through high-resolution satellite spectral vegetation indices and sea-truth calibration	2013	{"Belmonte, Alessandro","Bollanos, Stelios","Borfecchia, Flavio","Ceriola, Giulio","De Cecco, Luigi","Martini, Sandro","Micheli, Carla","Valiante, Luigi M.","Vlachopoulos, George"}	{"Non Zostera"}
1976940	Resource availability and meiofauna in sediment of tropical seagrass beds: Local versus global trends	2006	{"De Troch, M","Van Gansbeke, D","Vincx, M"}	{"Non Zostera","No Restoration Mentioned","Coastal Habitat"}
1975041	Production and carbonate dynamics of Halimeda incrassata (Ellis) Lamouroux altered by Thalassia testudinum Banks and So land ex Konig	2013	{"Barry, Savanna C.","Frazer, Thomas K.","Jacoby, Charles A."}	{"Non Zostera"}
1972854	The rhizosphere of aquatic plants is a habitat for cable bacteria	2019	{"Koren, Klaus","Meckenstock, Rainer U.","Mueller, Hubert","Nielsen, Lars Peter","Scholz, Vincent V."}	{"Non Zostera"}
1976566	Assessment of the water quality and ecosystem health of the Great Barrier Reef (Australia): Conceptual models	2007	{"Bainbridge, Zoe","Bass, Deb","Brodie, Jon","Hart, Barry","Haynes, David","Waterhouse, Jane"}	{"Non Seagrass","Coastal Habitat"}
1975970	Remote influence of off-shore fish farm waste on Mediterranean seagrass (Posidonia oceanica) meadows	2010	{"Marco-Mendez, C.","Ruiz, J. M.","Sanchez-Lizaso, J. L."}	{"Non Zostera"}
1975361	Habitat and Scale Shape the Demographic Fate of the Keystone Sea Urchin Paracentrotus lividus in Mediterranean Macrophyte Communities	2012	{"Alcoverro, Teresa","Ceccherelli, Giulia","Farina, Simone","Pinna, Stefania","Prado, Patricia","Roca, Guillem","Romero, Javier","Tomas, Fiona"}	{"Non Seagrass"}
1977915	Long term monitoring of Posidonia oceanica fish assemblages of the Scandola Marine Reserve (Corsica, northwestern Mediterranean).	2000	{"Francour, P"}	{"Non Zostera","No Restoration Mentioned"}
1978571	ENVIRONMENTALLY-INDUCED CATASTROPHIC MORTALITY OF THE SEA-URCHIN LYTECHINUS-VARIEGATUS IN SHALLOW SEAGRASS HABITATS OF SAINT-JOSEPHS BAY, FLORIDA	1994	{"BEDDINGFIELD, SD","MCCLINTOCK, JB"}	{"Non Zostera"}
1976181	Uptake and resource allocation of inorganic carbon by the temperate seagrasses Posidonia and Amphibolis	2009	{"Bryars, S.","Cheshire, A. C.","Collings, G. J.","Miller, D. J.","Nayar, S."}	{"Non Zostera"}
1975459	Modeling trophic interactions to assess the effects of a marine protected area: case study in the NW Mediterranean Sea	2012	{"Francour, Patrice","Gascuel, Didier","Guenette, Sylvie","Valls, Audrey"}	{"Non Seagrass","Coastal Habitat"}
1973369	Unrecognized loss of seagrass communities based on molluscan death assemblages: historic baseline shift in tropical Gulf of Aqaba, Red Sea	2018	{"Benayahu, Yehuda","Edelman-Furstenberg, Yael","Gilad, Ehud","Kidwell, Susan M."}	{"Non Zostera"}
1977940	Role of salt marshes as part of coastal landscapes	2000	{"BE Weinstein, MP","Cebrian, J","Cole, ML","Hauxwell, J","Joye, SB","Kreeger, DA","McClelland, J","Valiela, I"}	{"Non Seagrass"}
1973517	Blue carbon stores in tropical seagrass meadows maintained under green turtle grazing	2017	{"Bjorndal, Karen A.","Bolten, Alan B.","Gulick, Alexandra G.","Johnson, Robert A."}	{"Non Zostera"}
1976217	Macroalgae and seagrass contribution to gastropods in sub-tropical and temperate tidal flats	2009	{"Doi, Hideyuki","Fujikawa, Mamoru","Kanou, Keiich","Kikuchi, Eisuke","Matsumasa, Masatoshi","Suzuki, Takao"}	{"No Stressor/Restoration"}
1976780	Benthic metabolism across a gradient of anthropogenic impact in three shallow coastal lagoons in NW Florida	2007	{"Cebrian, Just","Corcoran, Alina A.","Hunter, Amy","Stutes, Adrienne L.","Stutes, Jason"}	{"Non Zostera"}
1976038	Phytotoxicity of atrazine, isoproturon, and diuron to submersed macrophytes in outdoor mesocosms	2010	{"Hollender, Juliane","Knauer, Katja","Knauert, Stefanie","Singer, Heinz"}	{"Non Zostera"}
1973483	Decomposition and nitrogen dynamics of turtle grass (Thalassia testudinum) in a subtropical estuarine system	2017	{"Cintra-Buenrostro, Carlos E.","Delgado, Monica","Fierro-Cabo, Alejandro"}	{"Non Zostera"}
1974357	Biomass-density data analysis: a comment on Cabaco et al. (2013)	2015	{"Leitao, Francisco","Mateus, Marcos","Vieira, Vasco M. N. C. S."}	{"No Stressor/Restoration"}
1979119	A SELECTIVE MEDIUM FOR ISOLATING CAMPYLOBACTER-JEJUNI-COLI	1982	{"BOLTON, FJ","ROBERTSON, L"}	{"Non Seagrass"}
1977135	Diagenetic stoichiometry and benthic nutrient fluxes at the sediment-water interface of Lake Illawarra, Australia	2005	{"Morrison, RJ","Qu, WC","Su, CW","West, RJ"}	{"Non Seagrass"}
1977042	Community perspectives and conservation needs fog dugongs (Dugong dugon) along the Andaman coast of Thailand	2005	{"Adulyanukosol, K","Dearden, P","Duffus, D","Hines, E"}	{"Non Seagrass"}
1978030	Differential predation and growth rates of bay scallops within a seagrass habitat	1999	{"Bologna, PAX","Heck, KL"}	{"Non Zostera"}
1978602	GROWTH PLASTICITY IN CYMODOCEA-NODOSA STANDS - THE IMPORTANCE OF NUTRIENT SUPPLY	1994	{"ALCOVERRO, T","DUARTE, CM","PEREZ, M","ROMERO, J","SANDJENSEN, K"}	{"Non Seagrass","Non Zostera"}
1978094	Periphyton architecture and susceptibility to grazing by periwinkles (Littorina littorea, Gastropoda)	1999	{"Sommer, U"}	{"Non Seagrass"}
1978916	CHARACTERIZATION OF ALLELOCHEMICALS IN AMERICAN EELGRASS	1989	{"CHENG, TS","RIEMER, DN"}	{"No Stressor/Restoration"}
1978894	RESPONSES OF CORAL REEFS AND REEF ORGANISMS TO SEDIMENTATION	1990	{"ROGERS, CS"}	{"Coastal Habitat"}
1974309	Relative effects of physical and small-scale nutrient factors on the distribution of tropical seagrasses in the Great White Heron National Wildlife Refuge, Lower Florida Keys	2015	{"Calle, Leonardo","Gawlik, Dale E.","Green, Lauri","Lapointe, Brian E."}	{"Non Zostera","No Stressor/Restoration"}
1974752	EFFECTS OF PINNA CLAMS ON BENTHIC MACROFAUNA AND THE POSSIBLE IMPLICATIONS OF THEIR REMOVAL FROM SEAGRASS ECOSYSTEMS	2014	{"Fourgerit, Valentin","Hughes, A. Randall","Kimbro, David L.","Leto, Jason","Macreadie, Peter I."}	{"Non Zostera"}
1977379	Grazing by manatees excludes both new and established wild celery transplants: Implications for restoration in Kings Bay, FL, USA	2004	{"Frazer, TK","Hauxwell, J","Osenberg, CW"}	{"Non Seagrass"}
1977284	Assessment of macro and microelement accumulation capability of two aquatic plants	2004	{"Alfani, A","Baldantoni, D","Bartoli, G","De Santo, AV","Di Tommasi, P"}	{"Non Zostera"}
1974124	Photochemical changes and oxidative damage in the aquatic macrophyte Cymodocea nodosa exposed to paraquat-induced oxidative stress	2016	{"Malea, Paraskevi","Moustakas, Michael","Sperdouli, Ilektra","Zafeirakoglou, Aristi"}	{"Non Zostera"}
1977723	Oxygen and carbon stable isotopic profiles of the fan mussel, Pinna nobilis, and reconstruction of sea surface temperatures in the Mediterranean	2001	{"Duarte, CM","Kennedy, DP","Kennedy, H","Richardson, CA"}	{"Non Seagrass","Coastal Habitat"}
1976910	Antibacterial compounds in estuarine submersed aquatic plants	2006	{"Ailstock, MS","Bushmann, PJ"}	{"Non Zostera"}
1973770	Kelp Forests and Seagrass Meadows	2017	{"BE Inniss, L","Calumpong, Hilconida","GP United Nat","Martin, Georg","Simcock, A","West, John A.","van Gaever, Saskia"}	{"No Stressor/Restoration"}
1973727	Effects of surrounding land use and water depth on seagrass dynamics relative to a catastrophic algal bloom	2017	{"Breininger, David R.","Breininger, Robert D.","Hall, Carlton R."}	{"No Stressor/Restoration"}
1978750	THE DISTRIBUTIONS AND GROWTH-PATTERNS OF 3 EPIPHYTIC HYDROIDS ON THE CARIBBEAN SEAGRASS THALASSIA-TESTUDINUM	1992	{"HUGHES, RG","KAEHLER, S"}	{"Non Zostera"}
1977240	Influence of an increased NaCl concentration on yield and quality of cherry tomato grown in posidonia (Posidonia oceanica (L) Delile)	2004	{"Caretto, S","De Gara, L","Leo, L","Santamaria, P","Serio, F"}	{"Non Zostera","No Stressor/Restoration"}
1973484	Sediment microbes mediate the impact of nutrient loading on blue carbon sequestration by mixed seagrass meadows	2017	{"Huang, Xiaoping","Jiang, Zhijian","Liu, Songlin","Macreadie, Peter I.","Wu, Yunchao","Zhang, Jingping"}	{"Non Zostera"}
1979067	DISTRIBUTION, ABUNDANCE, AND GROWTH OF JUVENILE DUNGENESS CRABS, CANCER-MAGISTER, IN GRAYS HARBOR ESTUARY, WASHINGTON	1984	{"ARMSTRONG, DA","STEVENS, BG"}	{"Non Seagrass"}
1977848	Diphyllobothriosis--experimental study.	2001	{"Sanzhieva, S D"}	{"Non Zostera"}
1977776	Temporal changes in the abundance, leaf growth and photosynthesis of three co-occurring Philippine seagrasses	2001	{"Agawin, NSR","Duarte, CM","Fortes, MD","Uri, JS","Vermaat, JE"}	{"Non Zostera"}
1976470	Use of multiple chemical tracers to define habitat use of indo-pacific mangrove crab, Scylla serrata (Decapoda : Portunidae)	2008	{"Cormier, Nicole","Demopoulos, Amanda W. J.","Ewel, Katherine C.","Fry, Brian"}	{"Non Seagrass"}
1972570	Long-term decomposition captures key steps in microbial breakdown of seagrass litter	2020	{"Jeffries, Thomas C.","Macreadie, Peter I.","Manojlovic, Bojana","Ralph, Peter","Trevathan-Tackett, Stacey M."}	{"No Stressor/Restoration"}
1975949	Lead bioaccumulation potential of an aquatic macrophyte Najas indica are related to antioxidant system	2010	{"Chakrabarty, D.","Dwivedi, Sanjay","Kumar, Amit","Singh, Ragini","Tripathi, R. D.","Trivedi, P. K."}	{"Non Zostera"}
1976136	Phosphorus release with carbonate dissolution coupled to sulfide oxidation in Florida Bay seagrass sediments	2009	{"Jensen, Henning S.","Koch, Marguerite S.","Nielsen, Ole I.","de Vicente, Inmaculada"}	{"Non Zostera"}
1978527	Complementary oxygen and nutrient fluxes in seagrass beds and mussel banks?	1995	{"Asmus, Harald","Asmus, Ragnhild M.","BE Dyer, K. R.","Orth, R. J.","Reise, Karsten","Wille, Anke","Zubillaga, Gabriela Frances"}	{"Coastal Habitat"}
1973003	Large Benthic Foraminifera in Low-Light Environments	2019	{"BE Loya, Y","Bridge, TCL","Puglise, KA","Renema, Willem"}	{"Non Seagrass"}
1978679	PRODUCTION AND NUTRIENT DYNAMICS OF A SYRINGODIUM-FILIFORME KUTZ - SEAGRASS BED IN INDIAN RIVER LAGOON, FLORIDA	1993	{"MONTGOMERY, J","SHORT, CA","SHORT, FT","ZIMMERMANN, CF"}	{"Non Zostera"}
1974178	Assessment and physiological state of the Posidonia oceanica meadows in Porto Cristo (Manacor, Spain)	2015	{"Box, Antonio","Sureda, Antoni","Tejada, Silvia"}	{"Non Zostera"}
1973765	Spatial and temporal variation in algal epiphyte distribution on Ulva sp (Ulvales, Chlorophyta) from northern Patagonia in Argentina	2017	{"Caceres, Eduardo J.","Escobar, Juan F.","Gauna, M. Cecilia","Odorisio, M.","Parodi, Elisa R."}	{"Non Seagrass"}
1973758	Coastal Wetlands	2017	{"BA Probert, PK","Probert, P. Keith"}	{"Non Seagrass"}
1978076	Stable isotope analyses of benthic organisms in Lake Baikal	1999	{"Yoshii, K"}	{"Non Seagrass","Coastal Habitat"}
1974669	Iron addition as a measure to restore water quality: Implications for macrophyte growth	2014	{"Bakker, E. S.","Geurts, J. J. M.","Ibelings, B. W.","Immers, A. K.","Ter Heerdt, G. N. J.","Van Donk, E.","Vendrig, K."}	{"Non Seagrass"}
1976909	Temperature and light requirements for growth of two diatom species (Bacillariophyceae) isolated from an Arctic macroalga	2006	{"Jung, Ines","Karsten, Ulf","Medlin, Linda","Rothe, Susanne","Schumann, Rhena"}	{"Non Seagrass"}
1976679	Transport, sloughing and settling rates of estuarine macrophytes: Mechanisms and ecological implications	2007	{"Amos, C. L.","Bergamasco, A.","Flindt, M. R.","Friend, P. L.","Levy, A.","Pedersen, C. B."}	{"Non Zostera"}
1974577	Influence of water depth on the carbon sequestration capacity of seagrasses	2014	{"Angel Mateo, Miguel","Lavery, Paul S.","Rozaimi, Mohammad","Serrano, Oscar"}	{"Non Zostera"}
1973726	Plasticity in turtle grass (Thalassia testudinum) flower production as a response to porewater nitrogen availability	2017	{"Darnell, Kelly M.","Dunton, Kenneth H."}	{"Non Zostera"}
1973807	Towards Regional Benchmarks of Fish Productivity in Nearshore Marine Ecosystems: Model Framework, Habitat Comparisons, and Examination of Regional Data.	2017	{"Dowd, M.","Wong, M.C."}	{"No Stressor/Restoration"}
1975872	Comparing ecosystem engineering efficiency of two plant species with contrasting growth strategies	2010	{"Bouma, T. J.","De Vries, M. B.","Herman, P. M. J."}	{"Non Seagrass"}
1978499	A TENTATIVE MODEL OF CD UPTAKE IN POTAMOGETON-PECTINATUS IN RELATION TO SALINITY	1995	{"GREGER, M","KAUTSKY, L","SANDBERG, T"}	{"Non Seagrass"}
1976252	Aerobic heterotrophic microbial activity associated with seagrass roots: effects of plant type and nutrient amendment	2009	{"Garland, Jay","Kilminster, Kieryn"}	{"Non Zostera"}
1978475	MOLLUSCAN BIODIVERSITY IN THE INDIAN-RIVER LAGOON, FLORIDA	1995	{"KARLEN, DJ","MIKKELSEN, PM","MIKKELSEN, PS"}	{"No Stressor/Restoration"}
1977184	Seasonal and small-scale spatial variability of herbivory pressure on the temperate seagrass Posidonia oceanica	2005	{"Romero, J","Tomas, F","Turon, X"}	{"Non Zostera"}
1978417	A test of the carbon/nutrient balance hypothesis for natural and fertilized populations of the tropical seagrass Thalassia testudinum	1996	{"Hatch, W. I.","Rhode, J. M.","Tanner, C. E."}	{"Non Zostera"}
1977343	Biomass response and changes in composition of ephemeral macroalgal assemblages along an experimental gradient of nutrient enrichment	2004	{"Engelbert, S","Karez, R","Kraufvelin, P","Pedersen, MF","Sommer, U"}	{"Non Zostera"}
1975894	An evaluation of a macroalgal bioassay tool for assessing the spatial extent of nutrient release from offshore fish farms	2010	{"Garcia, R.","Garcia-Sanz, T.","Gonzalez, M. N.","Perez, M.","Ruiz, M.","Ruiz-Fernandez, J. M."}	{"Non Zostera"}
1976977	Effects of nutrient enrichment and grazing on shoalgrass Halodule wrightii and its epiphytes: results of a field experiment	2006	{"Chaplin, G.","Heck, K. L., Jr.","Pennock, J. R.","Spitzer, P. M.","Valentine, J. F."}	{"Non Zostera"}
1973311	Living at the margins - The response of deep-water seagrasses to light and temperature renders them susceptible to acute impacts	2018	{"Chartrand, Kathryn M.","Ralph, Peter J.","Rasheed, Michael A.","Sinutok, Sutinee","Szabo, Milan"}	{"Non Zostera"}
1976299	Effects of shoot stiffness, shoot size and current velocity on scouring sediment from around seedlings and propagules	2009	{"Bouma, T. J.","Brun, F. G.","Friedrichs, M.","Graf, G.","Herman, P. M. J.","Klaassen, P.","Temmerman, S.","van Katwijk, M. M.","van Wesenbeeck, B. K."}	{"Non Seagrass"}
1976951	Assessment of coastal fish in the Baltic Sea.	2006	{"Adjers, Kaj","Andersson, Jan","Appelberg, Magnus","Eschbaum, Redik","Fricke, Ronald","Lappalainen, Antti","Minde, Atis","Ojaveer, Henn","Pelczarski, Wojciech","Repecka, Rimantas"}	{"No Stressor/Restoration"}
1977642	Benthic macrofauna in Tasmanian estuaries: scales of distribution and relationships with environmental variables	2002	{"Barrett, NS","Edgar, GJ"}	{"Non Zostera"}
1978745	HEIGHT OF ATTACHMENT ON SEAGRASS LEADS TO TRADE-OFF BETWEEN GROWTH AND SURVIVAL IN THE BAY SCALLOP ARGOPECTEN-IRRADIANS	1992	{"AMBROSE, WG","IRLANDI, EA"}	{"No Stressor/Restoration"}
1973203	Abrasion resistant outer wall material useful as brick material or coating layer comprises e.g. silicate cement, slag, carbon fiber graphite reinforced component, modified talc, phosphogypsum, auxiliary agent and anti-scouring composition	NA	{"WU J"}	{"No Stressor/Restoration"}
1974510	Ornamental Marine Species Culture in the Coral Triangle: Seahorse Demonstration Project in the Spermonde Islands, Sulawesi, Indonesia	2014	{"Abbott, Jessica","Blankenhorn, Sven","Cheng, Brian","Crafton, R. Eliot","Hameed, Sarah O.","Janetski, Noel","Rapi, Saipul","Trockel, Dale","Williams, Susan L."}	{"Non Seagrass"}
1977090	Marine-derived nitrogen and carbon in freshwater-riparian food webs of the Copper River Delta, southcentral Alaska	2005	{"Hicks, BJ","Lang, DW","Lang, ME","Wipfli, MS"}	{"Non Seagrass","No Restoration Mentioned"}
1978519	RESPONSES OF RESTORED GRASSLAND DITCH VEGETATION TO HYDROLOGICAL CHANGES, 1989-1992	1995	{"BEST, EPH","OOMES, MJM","VANDERSCHAAF, S"}	{"Non Seagrass"}
1978146	Diel foraging cycles and interactions among juvenile Atlantic cod (Gadus morhua) at a nearshore site in Newfoundland	1998	{"Brown, JA","Grant, SM"}	{"Non Seagrass"}
1977108	Tolerance of the invasive marine alga Caulerpa taxifolia to burial by sediment	2005	{"Gibson, PT","Glasby, TM","Kay, S"}	{"Non Seagrass"}
1978525	Phosphorus recycling in the seagrass Zostera marina L.	1995	{"Ansell, AD","BE Eleftheriou, A","Borum, J","Pedersen, MF","Smith, CJ"}	{"No Stressor/Restoration"}
1976667	A seasonal survey of the food web in the Lapalme Lagoon (northwestern Mediterranean) assessed by carbon and nitrogen stable isotope analysis	2007	{"Amouroux, Jean-Michel","Bodiou, Jean-Yves","Caparros, Jocelyne","Carlier, Antoine","Desmalades, Martin","Escoubeyrou, Karine","Gremare, Antoine","Riera, Pascal"}	{"No Stressor/Restoration","No Restoration Mentioned"}
1975504	FOUR THOUSAND YEARS OF HABITAT CHANGE IN FLORIDA BAY, AS INDICATED BY BENTHIC FORAMINIFERA	2012	{"Cheng, Jie","Collins, Laurel S.","Holmes, Charles"}	{"Non Zostera"}
1973392	Community Composition and Transcriptional Activity of Ammonia-Oxidizing Prokaryotes of Seagrass Thalassia hemprichii in Coral Reef Ecosystems	2018	{"Ahmad, Manzoor","Dong, Junde","Lin, Liyun","Lin, Xiancheng","Ling, Juan","Long, Lijuan","Wang, Cong","Yang, Qingsong","Zeng, Siquan","Zhang, Yanying","Zhang, Ying","Zhou, Weiguo"}	{"Non Zostera"}
1972589	Data on sediment nitrogen loadings and nitrogen in the biomass of seagrasses from Sungai Pulai estuary (Johor, Malaysia)	2020	{"Arina, Natasha","Ashikin, Che Nurul","Fairoz, Mohammad","Hidayah, Nur","Rozaimi, Mohammad"}	{"Non Zostera"}
1979264	MECHANISM OF INDUCTION OF 3-HYDROXY-3-METHYLGLUTARYL COENZYME-A REDUCTASE IN HUMAN LEUKOCYTES	1977	{"EDWARDS, PA","FOGELMAN, AM","POPJAK, G","SEAGER, J"}	{"Non Seagrass"}
2545969	Spatio-temporal patterns in juvenile habitat for 13 groundfishes in the California Current Ecosystem	2020	{"Haltuch, Melissa","Tolimieri, Nick","Wallace, John"}	{"Non Seagrass"}
1978980	EPIPHYTIC DIATOMS ON THE LEAF OF EELGRASS ZOSTERA-JAPONICA AND ARTIFICIAL SUBSTRATE IN BRACKISH EELGRASS BELT	1987	{"IIKURA T","KITAMURA S","TANAKA N","TODA S"}	{"No Stressor/Restoration","No Restoration Mentioned"}
1974209	The attenuation of current- and wave-driven flow within submerged multispecific vegetative canopies	2015	{"Koseff, Jeffrey R.","Thomas, Florence I. M.","Weitzman, Joel S.","Zeller, Robert B."}	{"Non Seagrass"}
1978446	Population biology of the mud crab, Dyspanopeus sayi, an important predator of juvenile bay scallops in Long Island (USA) eelgrass beds	1995	{"Bauer, SI","Bricelj, VM","Strieb, MD"}	{"Non Seagrass"}
1979254	BIOLOGY OF 2 EXPLOITED SPECIES OF HALFBEAKS, HEMIRAMPHUS-BRASILIENSIS AND HEMIRAMPHUS-BALAO FROM SOUTHEAST FLORIDA	1978	{"BERKELEY, SA","HOUDE, ED"}	{"Non Zostera"}
1972718	Acanthocephalan parasites in sea otters: Why we need to look beyond associated mortality horizontal ellipsis	2020	{"Lagrue, Clement","Shanebeck, Kyle M."}	{"Non Seagrass"}
1975397	Life cycle, physiology, ecology and red tide occurrences of the fish-killing raphidophyte Chattonella	2012	{"Imai, Ichiro","Yamaguchi, Mineo"}	{"No Stressor/Restoration","No Restoration Mentioned"}
1978529	SEASONAL AND LOCAL VARIATION OF CR, NI AND CO CONCENTRATIONS IN ULVA-RIGIDA C AGARDH AND ENTEROMORPHA-LINZA (LINNAEUS) FROM THERMAIKOS GULF, GREECE	1995	{"HARITONIDIS, S","MALEA, P"}	{"Non Seagrass"}
1977930	Retention of lignin in seagrasses: angiosperms that returned to the sea	2000	{"Boon, JJ","Hemminga, MA","Klap, VA"}	{"No Stressor/Restoration"}
1977852	Dormancy and foliar density regulation in Thalassia testudinum	2000	{"Galindo, CA","Marquez, J","van Tussenbroek, BI"}	{"Non Zostera"}
1976019	Spatial distribution, abundance and relationship to habitat features of the queen conch Eustrombus gigas (Linnaeus) (Mollusca: Strombidae) in Nuestra Senora del Rosario archipelago, Caribbean coast of Colombia	2010	{"Garcia-Valencia, Carolina","Gomez-Campo, Kelly","Rueda, Mario"}	{"Non Seagrass"}
1975274	The role of hydrodynamics on seed dispersal in seagrasses	2012	{"Kendrick, G. A.","Lowe, R. J.","Ruiz-Montoya, L.","Van Niel, K. P."}	{"Non Zostera","No Stressor/Restoration"}
1973257	THE HABITATS AND BIODIVERSITY OF WATAMU MARINE NATIONAL PARK: EVALUATING OUR KNOWLEDGE OF ONE OF EAST AFRICA'S OLDEST MARINE PROTECTED AREAS.	2018	{"Cowburn, B.","Goebbels, D.","Hereward, H.F.R.","Horions, M.","Kamire, J.","Kohlmeier, D.","Musembi, P.M.","Nussbaumer, A.","Raker, C.","Rogers, A.D.","Sindorf, V.","Sluka, R.D.","Taylor, M.L.","Van Baelenberghe, B."}	{"Non Seagrass"}
1974051	Remote underwater video reveals grazing preferences and drift export in multispecies seagrass beds	2016	{"Chen, Chien-Hsun","Huang, Yen-Hsun","Lee, Chen-Lu","Lin, Hsing-Juh"}	{"No Stressor/Restoration"}
1975822	Wave-induced velocities inside a model seagrass bed	2010	{"Coutu, Sylvain","Fox, Samantha","Infantes, Eduardo","Luhar, Mitul","Nepf, Heidi"}	{"No Stressor/Restoration"}
1973039	The existence of cyanobactericidal bacteria and growth-inhibiting bacteria on water plants in Lake Ohnuma, Japan	2019	{"Hagiwara, Takumi","Imai, Ichiro","Miyashita, Yohei"}	{"Non Seagrass"}
1973058	The Microbial Communities of Leaves and Roots Associated with Turtle Grass (Thalassia testudinum) and Manatee Grass (Syringodium filliforme) are Distinct from Seawater and Sediment Communities, but Are Similar between Species and Sampling Sites	2019	{"Laas, Peeter","Stingl, Ulrich","Ugarelli, Kelly"}	{"Non Zostera","No Restoration Mentioned"}
1977792	Modeling submersed macrophyte growth in relation to underwater light climate: modeling approaches and application potential	2001	{"Bartell, SM","Best, EPH","Boyd, WA","Buzzelli, CP","Campbell, KR","Doyle, RD","Wetzel, RL"}	{"Non Seagrass"}
1973116	Overwintering behavior of juvenile sea turtles at a temperate foraging ground	2018	{"Gault, Kathleen","Lamont, Margaret M.","Seay, David R."}	{"Non Zostera"}
1974680	Ocean acidification outweighs nutrient effects in structuring seagrass epiphyte communities	2014	{"Campbell, Justin E.","Fourqurean, James W."}	{"Non Zostera"}
1973118	Characterizing blue carbon stocks in Thalassia testudinum meadows subjected to different phosphorus supplies: A lignin biomarker approach	2018	{"Barry, Savanna C.","Bianchi, Thomas S.","Frazer, Thomas K.","Hutchings, Jack A.","Jacoby, Charles A.","Shields, Michael R."}	{"Non Zostera"}
1974289	Intra-specific responses of Cymodocea nodosa to macro-nutrient, irradiance and copper exposure	2015	{"Brown, Murray T.","Orfanidis, Sotiris","Papathanasiou, Vasillis"}	{"Non Seagrass"}
1978510	PATTERNS IN THE PHOTOSYNTHETIC METABOLISM OF MEDITERRANEAN MACROPHYTES	1995	{"DUARTE, CM","ENRIQUEZ, S","SANDJENSEN, K"}	{"No Stressor/Restoration"}
1973707	Growth, feed utilization and energy budgets of the sea cucumber Apostichopus japonicus with different diets containing the green tide macroalgae Chaetomorpha linum and the seagrass Zostera marina	2017	{"Lin, Chenggang","Song, Xiaoyue","Xu, Qiang","Yang, Hongsheng","Zhou, Yi"}	{"No Stressor/Restoration"}
1977063	Periphyton light transmission relationships in Florida Bay and the Florida Keys, USA	2005	{"Frankovich, TA","Zieman, JC"}	{"Non Seagrass"}
1974901	Patterns of top-down control in a seagrass ecosystem: could a roving apex predator induce a behaviour-mediated trophic cascade?	2013	{"Burkholder, Derek A.","Dill, Lawrence M.","Fourqurean, James W.","Heithaus, Michael R.","Wirsing, Aaron"}	{"Non Zostera"}
1974513	Indirect effects may buffer negative responses of seagrass invertebrate communities to ocean acidification	2014	{"Buia, M. Cristina","Gambi, M. Cristina","Garrard, Samantha L.","Lorenti, Maurizio","Paterson, David M.","Patti, Francesco P.","Scipione, M. Beatrice","Zupo, Valerio"}	{"Non Zostera"}
1973818	Habitat Configuration Alters Herbivory across the Tropical Seascape	2017	{"Bazen, William D.","Harman, Nicholas W.","Murdoch, Robyn J.","Swindells, Kate L.","Unsworth, Richard K. F."}	{"Non Zostera"}
1975782	Interactions of Thalassia testudinum and sediment biogeochemsistry in Santa Rosa Sound, NW Florida	2011	{"Aukamp, Jessica","Devereux, Richard","Eldridge, Peter M.","Jordan, Stephen J.","Quarles, Robert L.","Stanley, Roman S.","Yates, Diane F."}	{"Non Zostera"}
1973434	Biology of Coral Reefs, 2nd Edition	2018	{"BA Sheppard, CRC","Davy, SK","Davy, SK","Graham, NAJ","Graham, NAJ","Pilling, GM","Pilling, GM","Sheppard, CRC"}	{"Non Seagrass"}
1972590	Root microbiomes as indicators of seagrass health	2020	{"Alarcon, Marta Sanchez","Fraser, Matthew W.","Gleeson, Deirdre","Holmer, Marianne","Kendrick, Gary A.","Kilminster, Kieryn","Martin, Belinda C.","Middleton, Jen A.","Ryan, Megan H."}	{"Non Zostera"}
1973280	Status of seagrass ecosystems in India	2018	{"Bhatt, J. R.","Thangaradjou, T."}	{"Non Zostera"}
1978188	Root production and belowground seagrass biomass	1998	{"Agawin, NSR","Duarte, CM","Fortes, MD","Gallegos, ME","Hemminga, MA","Marba, N","Merino, M","Uri, J"}	{"No Stressor/Restoration"}
1978644	Growth of the seagrass Posidonia sinuosa Cambridge et Kuo at locations near to, and remote from, a power station thermal outfall in northern Spencer Gulf, South Australia	1994	{"Ainslie, R. C.","Johnston, D. A.","Offler, E. W."}	{"Non Zostera"}
1977804	Productivity estimation in Halodule wrightii: comparison of leaf-clipping and leaf-marking techniques, and the importance of clip height	2001	{"Allison, TC","DeYoe, HR","Kaldy, JE","Kowalski, JL"}	{"Non Zostera"}
1975671	Knowledge gaps in tropical Southeast Asian seagrass systems	2011	{"Affendi, Yang Amri","Kendrick, Gary A.","Ooi, Jillian Lean Sim","Van Niel, Kimberly P."}	{"Non Zostera"}
1978651	SUBMERGED VASCULAR PLANTS AND WATER CHEMISTRY IN THE COASTAL MARSH ALBUFERA DE MALLORCA (BALEARIC-ISLANDS)	1993	{"MARTINEZTABERNER, A","MOYA, G"}	{"Non Zostera"}
1978829	DISINTEGRATION OF HOLOTHURIAN FECAL PELLETS IN BEDS OF THE SEAGRASS THALASSIA-TESTUDINUM	1991	{"CONDE, JE","DIAZ, H","SAMBRANO, A"}	{"Non Zostera"}
1977908	Water-quality monitoring and biological integrity assessment in the Indian River Lagoon, Florida: Status, trends, and loadings (1988-1994)	2000	{"Sigua, GC","Steward, JS","Tweedale, WA"}	{"Non Zostera"}
1978549	ALKALINE-PHOSPHATASE ACTIVITY IN ZOSTERA-NOLTII HORNEM AND ITS CONTRIBUTION TO THE RELEASE OF PHOSPHATE IN THE PALMONES RIVER ESTUARY	1994	{"FERNANDEZ, JA","HERNANDEZ, I","NIELL, FX","PEREZLLORENS, JL"}	{"Coastal Habitat"}
1976111	High diversity of Ruppia meadows in saline ponds and lakes of the western Mediterranean	2009	{"Sierens, Tim","Triest, Ludwig"}	{"Non Zostera"}
1977983	Acetogenic and sulfate-reducing bacteria inhabiting the rhizoplane and deep cortex cells of the sea grass Halodule wrightii	1999	{"Devereux, R","Drake, HL","Kusel, K","Pinkart, HC"}	{"Non Zostera"}
1975201	Spatial pattern in seagrass stoichiometry indicates both N-limited and P-limited regions of an iconic P-limited subtropical bay	2013	{"Burkholder, Derek A.","Fourqurean, James W.","Heithaus, Michael R."}	{"Non Zostera"}
1973349	Eco-engineering of modified shorelines recovers wrack subsidies	2018	{"Bishop, M. J.","Heath, T.","Steinberg, P. D.","Strain, E. M. A."}	{"Non Zostera"}
1974913	Facilitation and competition among foundation species of submerged macrophytes threatened by severe eutrophication and implications for restoration	2013	{"Hao, Beibei","Liu, Guihua","Shi, Qiao","Wu, Haoping","Xing, Wei"}	{"Non Seagrass"}
1978912	VARIATION IN GROWTH-RATE AND REPRODUCTION OF THE BRYOZOAN BUGULA-NERITINA	1989	{"KEOUGH, MJ"}	{"Non Seagrass"}
1979106	CORRELATION BETWEEN MACROPHYTE VEGETATION AND SOME WATER PROPERTIES IN THE IRRIGATION SYSTEM OF THE LOWER RIVER PO PLANE ITALY	1983	{"GERDOL R","PICCOLI F"}	{"Non Seagrass"}
1973294	Food choice effects on herbivory: Intra-specific seagrass palatability and inter-specific macrophyte palatability in seagrass communities	2018	{"Brun, Fernando G.","Egea, Luis G.","Jimenez-Ramos, Rocio","Vergara, Juan J."}	{"No Stressor/Restoration"}
2545976	Decomposition Rates of Surficial and Buried Organic Matter and the Lability of Soil Carbon Stocks Across a Large Tropical Seagrass Landscape	2020	{"Carrion, Claudia I.","Fourqurean, James W.","Howard, Jason L.","Lopes, Christian C.","McGee-Absten, Vicki","Wilson, Sara S."}	{"Non Zostera"}
1976536	C-13 and N-15 translocation within and among shoots in two Posidonia species from Western Australia	2008	{"Collier, Catherine J.","Lavery, Paul S.","Prado, Patricia"}	{"Non Zostera"}
1976428	Growth performance of planted mangroves in the Philippines: Revisiting forest management strategies	2008	{"Rollon, Rene N.","Samson, Maricar S."}	{"Coastal Habitat"}
1978121	Seasonal variations in the rate of photosynthetic activity and chemical composition of the seagrass Cymodocea nodosa (Ucr.) Asch.	1998	{"De Rosa, S","Travizi, A","Zavodnik, N"}	{"Non Zostera"}
1976213	Shade-induced response and recovery of the seagrass Posidonia sinuosa	2009	{"Collier, Catherine J.","Lavery, Paul S.","Masini, Raymond J.","Ralph, Peter J."}	{"Non Zostera"}
1978135	Assessment of spatial and temporal variability in ecosystem attributes of the St Marks National Wildlife Refuge, Apalachee Bay, Florida	1998	{"Baird, D","Christian, RR","Luczkovich, J"}	{"Non Zostera"}
1976525	Improvements in the use of aquatic herbicides and establishment of future research directions	2008	{"Getsinger, Kurt D.","Grue, C. E.","Koschnick, T. J.","Netherland, M. D."}	{"Non Seagrass"}
1973081	A review of the global diversity and natural history of stalked jellyfishes (Cnidaria, Staurozoa)	2018	{"Collins, Allen G.","Hirano, Yayoi M.","Marques, Antonio C.","Mills, Claudia E.","Miranda, Lucilia S."}	{"Non Seagrass"}
1972683	Mangrove and mudflat food webs are segregated across four trophic levels, yet connected by highly mobile top predators	2019	{"Hayden, Brian","Lawrence, Andrew J.","Marley, Guy","Phillip, Dawn A. T."}	{"Non Seagrass"}
1972930	Eelgrass Sediment Microbiome as a Nitrous Oxide Sink in Brackish Lake Akkeshi, Japan	2019	{"Fukui, Manabu","Nakagawa, Tatsunori","Takahashi, Reiji","Tsuchiya, Yuki","Ueda, Shingo"}	{"No Stressor/Restoration"}
2100330	Feeding lobster by selecting fertile soil pond, planting eelgrass and waterweed, stocking, adding complex vitamins, calcium tablets and lactic acid bacteria to feed, splashing photosynthetic bacteria and quicklime, and hatching lobster	NA	{"YUAN J"}	{"Non Seagrass"}
1977178	Trophic shifts in three subtropical Australian halfbeaks (Teleostei : Hemiramphidae)	2005	{"Carseldine, L","Tibbetts, IR"}	{"Non Seagrass"}
1973898	Biogeochemistry of dissolved inorganic carbon and nutrients in seagrass (Zostera noltei) sediments at high and low biomass	2016	{"Anschutz, Pierre","Avaro, Jonathan","Bichon, Sabrina","Cesbron, Florian","Deflandre, Bruno","Delgard, Marie Lise","Kochoni, Emeric","Poirier, Dominique"}	{"Non Seagrass"}
1972572	Genetic Diversity and Demographic Connectivity of Atlantic Green Sea Turtles at Foraging Grounds in Northeastern Colombia, Caribbean Sea	2020	{"Aminta Lauregui-Romero, Guiomar","Hernandez-Rivera, Leidy","Noriega-Hoyos, Carmen L.","Sealer, Kathleen Sullivan","Vasquez-Carrillo, Catalina"}	{"Non Seagrass","Non Zostera"}
1976555	Organic matter sources in an enclosed coastal inlet assessed using lipid biomarkers and stable isotopes	2008	{"Fredericks, David","Holdsworth, Daniel G.","Revill, Andrew T.","Volkman, John K."}	{"Non Seagrass"}
1975793	Nutrient inputs from submarine groundwater discharge on the Santiago reef flat, Bolinao, Northwestern Philippines	2011	{"Cabrera, Olivia","Cardenas, M. Bayani","Jacinto, Gil S.","Lourdes San Diego-McGlone, Maria","Senal, Maria Isabel S.","Siringan, Fernando","Soria, Lea","Villanoy, Cesar","Zamora, Peter"}	{"Non Seagrass"}
1978486	POLLUTION IMPACT STUDY IN GABES GULF (TUNISIA) USING REMOTE-SENSING DATA	1995	{"BENMOUSSA, H","CARIOU, C","GUILLAUMONT, B","MAMMOU, AB","MUSTAPHA, SB","SOUSSI, N","ZAOUALI, J"}	{"Non Zostera"}
1976158	Carbon sources supporting a diverse fish community in a tropical coastal ecosystem (Gazi Bay, Kenya)	2009	{"Bouillon, S.","Mavuti, K.","Ntiba, M.","Nyunja, J.","Onyari, J.","Soetaert, K."}	{"No Stressor/Restoration"}
1973891	IS COMMERCIAL HARVESTING OF BEACH-CAST SEAWEED ECOLOGICALLY SUSTAINABLE?	2016	{"Dudas, Sarah E.","Holden, Jessica J.","Juanes, Francis"}	{"Non Seagrass"}
1978215	A wetland managed for agriculture as an interface between the Rhone river and the Vaccares lagoon (Camargue, France): Transfer of water and nutrients	1998	{"Chauvelon, P."}	{"Non Seagrass","Non Zostera"}
1977218	The effect of epiphytic algae on the growth and production of Potamogeton perfoliatus L. in two light conditions	2004	{"Asaeda, T","Fujino, T","Manatunge, J","Sultana, M"}	{"Non Seagrass"}
1978650	FLOCKING AND FEEDING IN THE FIDDLER-CRAB (UCA-TANGERI) - PREY AVAILABILITY AS RISK-TAKING BEHAVIOR	1993	{"ENS, BJ","KLAASSEN, M","ZWARTS, L"}	{"Non Seagrass"}
1979226	LEAF PRODUCTIVITY OF THE SEAGRASS, POSIDONIA-AUSTRALIS, IN EASTERN AUSTRALIAN WATERS	1979	{"LARKUM, AWD","WEST, RJ"}	{"Non Zostera"}
1978161	Macrophyte growth and sediment phosphorus and nitrogen in a Canadian prairie river	1998	{"Carr, GM","Chambers, PA"}	{"Non Seagrass"}
1977877	Sulfide effects on Thalassia testudinum carbon balance and adenylate energy charge	2000	{"Erskine, JM","Koch, MS"}	{"Non Zostera"}
1975475	Indirect effects of fish cage aquaculture on shallow Posidonia oceanica seagrass patches in coastal Greek waters	2012	{"Karakassis, Ioannis","Peterson, Bradley J.","Rountos, Konstantine J."}	{"Non Zostera"}
1973555	Photosynthetic activity and photoprotection in green and red leaves of the seagrasses, Halophila ovalis and Cymodocea rotundata: implications for the photoprotective role of anthocyanin	2017	{"Buapet, Pimchanok","Makkliang, Fonthip","Thammakhet-Buranachai, Chongdee"}	{"Non Zostera"}
1977098	Habitat triage for exploited fishes: Can we identify essential "Essential Fish Habitat?"	2005	{"Levin, PS","Stunz, GW"}	{"Non Seagrass"}
1974267	Stable isotopes and oceanographic modeling reveal spatial and trophic connectivity among terrestrial, estuarine, and marine environments	2015	{"Banas, N.","Bucci, J.","Conway-Cranos, L.","Kiffney, P.","MacCready, P.","Naman, S.","Plummer, M.","Ruckelshaus, M."}	{"Non Seagrass","Coastal Habitat"}
1974989	Ecological trade-offs in seascape ecology: bay scallop survival and growth across a seagrass seascape	2013	{"Carroll, John M.","Peterson, Bradley J."}	{"Non Seagrass"}
1978572	THE INFLUENCE OF TEMPERATURE, SALINITY, AND POSTLARVAL TRANSPORT ON THE DISTRIBUTION OF JUVENILE SPINY LOBSTERS, PANULIRUS-ARGUS (LATREILLE, 1804), IN FLORIDA BAY	1994	{"BUTLER, MJ","FIELD, JM"}	{"Non Seagrass"}
1973382	Limited pollen dispersal, small genetic neighborhoods, and biparental inbreeding in Vallisneria americana	2018	{"Lloyd, Michael W.","Neel, Maile C.","Tumas, Hayley R."}	{"Non Seagrass"}
1972829	Some Features of the Species, Spatial, and Trophic Structure of Macrobenthos in the Lagoon Systems of the Ermolinskaya and Nikol'skaya Inlets (Kandalaksha Bay, the White Sea)	2019	{"Stolyarov, A. P."}	{"No Stressor/Restoration"}
1979276	MACROPHYTE-EPIPHYTE BIOMASS AND PRODUCTIVITY IN AN EELGRASS (ZOSTERA-MARINA L) COMMUNITY	1977	{"PENHALE, PA"}	{"No Stressor/Restoration"}
1974820	Recovery of organic-enriched sediments through microbial degradation: implications for eutrophic estuaries	2014	{"Flindt, Mogens R.","Kristensen, Erik","Quintana, Cintia O.","Valdemarsen, Thomas"}	{"Non Zostera"}
1978814	SEDIMENT INTERACTIONS WITH SUBMERSED MACROPHYTE GROWTH AND COMMUNITY DYNAMICS	1991	{"BARKO, JW","CARPENTER, SR","GUNNISON, D"}	{"Non Zostera"}
1976683	Nutrient and plankton dynamics in an intermittently closed/open lagoon, Smiths Lake, south-eastern Australia: An ecological model	2007	{"Baird, Mark E.","Everett, Jason D.","Suthers, Iain M."}	{"Non Seagrass"}
1977054	Long-term response of a shallow, moderately flushed lake to reduced external phosphorus and nitrogen loading	2005	{"Adrian, R","Hilt, S","Kohler, J","Kozerski, HP","Nicklisch, A","Walz, N"}	{"Non Seagrass"}
1977644	Nutrient availability in the sediment and the reciprocal effects between the native seagrass Cymodocea nodosa and the introduced rhizophytic alga Caulerpa taxifolia	2002	{"Ceccherelli, G","Sechi, N"}	{"Non Zostera"}
1975655	Of: The Capture and Destruction of Escherichia coli from Simulated Urban Runoff Using Conventional Bioretention Media and Iron Oxide-coated Sand, L. Zhang, E. A. Seagren, A. P. Davis, J. S. Karns, 82, 701-714 (2010)	2011	{"Minervini, William P."}	{"Non Seagrass"}
1979223	ALLELOPATHY IN DWARF SPIKERUSH (ELEOCHARIS-COLORADOENSIS)	1980	{"DECHORETZ, N","FRANK, PA"}	{"Non Seagrass"}
1978020	Nitrogen cycling and anthropogenic impact in the tropical interamerican seas	1999	{"Corredor, JE","Howarth, RW","Morell, JM","Twilley, RR"}	{"Non Zostera"}
1978207	Modeling dissolved oxygen dynamics of Tampa Bay during summer of 1991	1998	{"BE Spaulding, ML","Blumberg, AF","Sheng, YP","Yassuda, EA"}	{"Non Zostera"}
1979190	MICROSPOROCYTE GROWTH AND MEIOSIS IN PHYLLOSPADIX-TORREYI, A MARINE MONOCOTYLEDON	1980	{"RUDENBERG, L","STEWART, JG"}	{"Non Zostera"}
1974549	Ecological niches of three abundant Caulerpa species in Port Phillip Bay, southeast Australia	2014	{"Crockett, Peter F.","Keough, Michael J."}	{"Non Seagrass"}
1977726	Influence of algal farming on fish assemblages	2001	{"Bergman, KC","Ohman, MC","Svensson, S"}	{"Non Seagrass"}
1975969	Influence of nutrients in the feeding ecology of seagrass (Posidonia oceanica L.) consumers: a stable isotopes approach	2010	{"Alcoverro, Teresa","Prado, Patricia","Romero, Javier"}	{"Non Zostera"}
1977226	Variations in the concentration of phenolic compounds in the seagrass Posidonia oceanica under conditions of competition	2004	{"Costa, J","Desjobert, JM","Dumay, O","Pergent, G"}	{"Non Zostera"}
1976594	Composition, biomass and secondary production of the macrobenthic invertebrate assemblages in a coastal lagoon exploited for extensive aquaculture: Valle Smarlacca (northern Adriatic Sea)	2007	{"Ceccherelli, Victor Ugo","Colangelo, Marina Antonia","Ponti, Massimo"}	{"Non Zostera"}
1977028	Evaluation of the effects produced by the construction and expansion of marinas on Posidonia oceanica (L.) Delile meadows	2005	{"Fernandez-Torquemada, Y.","Gonzalez-Correa, J. M.","Martinez, J. E.","Sanchez-Lizaso, J. L."}	{"Non Zostera"}
1975661	Spatio-temporal distribution of floating objects in the German Bight (North Sea)	2011	{"Gutow, Lars","Hinojosa, Ivan A.","Joschko, Tanja","Thiel, Martin"}	{"Non Seagrass"}
1972549	Trophic plasticity in the sea urchin Paracentrotus lividus, as a function of resource availability and habitat features	2020	{"Camps-Castella, Judith","Prado, Patricia","Romero, Javier"}	{"Non Zostera"}
1973879	Seagrass on the rocks: Posidonia oceanica settled on shallow-water hard substrata withstands wave stress beyond predictions	2016	{"Bianchi, Carlo Nike","Cabella, Roberto","Carbone, Cristina","Elter, Franco Marco","Ferrari, Marco","Montefalcone, Monica","Morri, Carla","Schiaffino, Chiara Francesca","Vacchi, Matteo"}	{"Non Zostera"}
1977264	The impact of Hurricane Georges on soft-bottom, back reef communities: Site- and species-specific effects in south Florida seagrass beds	2004	{"Fourqurean, JW","Rutten, LM"}	{"Non Zostera"}
1976000	The response of periphyton and submerged macrophytes to nitrogen and phosphorus loading in shallow warm lakes: a mesocosm experiment	2010	{"Beklioglu, Meryem","Jeppesen, Erik","Johansson, Liselotte S.","Ozkan, Korhan"}	{"Non Seagrass"}
1978782	PRESENCE AND ROLE OF MYCORRHIZAE IN COASTAL SUBMERSED MACROPHYTES	1992	{"STEVENSON J C","WIGAND C"}	{"Non Seagrass"}
1978214	Biochemical composition of particulate organic matter and bacterial dynamics at the sediment-water interface in a Mediterranean seagrass system	1998	{"Danovaro, R","Della Croce, N","Fabiano, M"}	{"Non Zostera"}
1974951	Variability in the Carbon Storage of Seagrass Habitats and Its Implications for Global Estimates of Blue Carbon Ecosystem Service	2013	{"Lavery, Paul S.","Mateo, Miguel-Angel","Rozaimi, Mohammad","Serrano, Oscar"}	{"Non Zostera"}
1974395	MODELING FOOD WEB STRUCTURE AND SELENIUM BIOMAGNIFICATION IN LAKE MACQUARIE, NEW SOUTH WALES, AUSTRALIA, USING STABLE CARBON AND NITROGEN ISOTOPES	2015	{"Batley, Graeme E.","Chariton, Anthony A.","Gruber, Bernd","Krikowa, Frank","Maher, William A.","Potts, Jaimie","Schneider, Larissa","Taylor, Anne M."}	{"Non Zostera","Coastal Habitat"}
1974318	Linking Seed Photosynthesis and Evolution of the Australian and Mediterranean Seagrass Genus Posidonia	2015	{"Celdran, David","Lloret, Javier","Marin, Arnaldo","Verduin, Jennifer","van Keulen, Mike"}	{"Non Zostera"}
1978936	DIAGENESIS IN SUBRECENT MARINE-SEDIMENTS IN THE EASTERN SCHELDT, SOUTHWEST NETHERLANDS	1988	{"OENEMA, O"}	{"Non Seagrass"}
1976386	Comparison between epiphyte assemblages of leaves and rhizomes of the seagrass Posidonia oceanica subjected to different levels of anthropogenic eutrophication	2008	{"Balata, David","Bertocci, Iacopo","Nesti, Ugo","Piazzi, Luigi"}	{"Non Zostera"}
1975008	Loss of 'Blue Carbon' from Coastal Salt Marshes Following Habitat Disturbance	2013	{"Hughes, A. Randall","Kimbro, David L.","Macreadie, Peter I."}	{"Non Zostera","Coastal Habitat"}
1974078	Communities of Cultivable Root Mycobionts of the Seagrass Posidonia oceanica in the Northwest Mediterranean Sea Are Dominated by a Hitherto Undescribed Pleosporalean Dark Septate Endophyte	2016	{"Borovec, Ondrej","Kolarik, Miroslav","Vohnik, Martin"}	{"Non Zostera"}
1973995	The White Sea threespine stickleback population: spawning habitats, mortality, and abundance	2016	{"Golovin, P. V.","Ivanov, M. V.","Ivanova, T. S.","Lajus, D. L.","Polyakova, N. V."}	{"Coastal Habitat"}
1974241	Comparative ecophysiology of bloom-forming macroalgae in the Indian River Lagoon, Florida: Ulva lactuca, Hypnea musciformis, and Gracilaria tikvahiae	2015	{"Lapointe, Brian E.","Whitehouse, Lisa N. A."}	{"Non Zostera"}
1973790	Is this the last stand of the Critically Endangered green sawfish Pristis zijsron in the Arabian Gulf?	2017	{"Al Ali, Sultan R.","Al Baharna, Reem A.","Al Blooshi, Ayesha Y.","Al Dhaheri, Shaikha S.","Al Suwaidi, Khalfan O.","Jabado, Rima W."}	{"Non Seagrass"}
1976315	Seasonal Changes in Abundance of Ammonia-Oxidizing Archaea and Ammonia-Oxidizing Bacteria and Their Nitrification in Sand of an Eelgrass Zone	2009	{"Ando, Yoshifumi","Nakagawa, Tatsunori","Takahashi, Reiji","Tokuyama, Tatsuaki","Yoshihara, Kiyoshi"}	{"No Stressor/Restoration"}
1976699	Variation in multiple traits of vegetative and reproductive seagrass tissues influences plant-herbivore interactions	2007	{"Alcoverro, Teresa","Becerro, Mikel A.","Romero, Javier","Verges, Adriana"}	{"Non Zostera"}
1972966	Density-dependent growth of bivalves dominating the intertidal zone of Banc d'Arguin, Mauritania: importance of feeding mode, habitat and season	2019	{"Lok, Tamar","Piersma, Theunis","van Gils, Jan A.","van der Geest, Matthijs","van der Lely, Jorge A. C."}	{"No Stressor/Restoration"}
1978474	ECTOPROCT DIVERSITY OF THE INDIAN-RIVER COASTAL LAGOON	1995	{"WINSTON, JE"}	{"Non Seagrass"}
1976080	Fertilizer application apparatus for use in culture apparatus to supply nutrient to e.g. sea tangle, has discharge member hung from sea surface member in position near sea surface for discharging nutrient to vicinity of seaweed	NA	{"KONDO T"}	{"No Stressor/Restoration"}
1978534	TEMPERATURE EFFECTS ON PHOTOSYNTHESIS AND DEPTH DISTRIBUTION OF THE SEAGRASS CYMODOCEA-NODOSA (UCRIA) ASCHERSON IN A MEDITERRANEAN COASTAL LAGOON - THE MAR MENOR (SE SPAIN)	1995	{"ROS, JD","TERRADOS, J"}	{"Non Zostera"}
1975403	Macrophytes respond to reach-scale river restorations	2012	{"Haase, Peter","Januschke, Kathrin","Korte, Thomas","Lorenz, Armin W.","Sundermann, Andrea"}	{"Non Seagrass"}
1974905	The effect of salinity on the germination of Ruppia tuberosa and Ruppia megacarpa and implications for the Coorong: A coastal lagoon of southern Australia	2013	{"Aldridge, K. T.","Brookes, J. D.","Ganf, G. G.","Kim, D. H."}	{"Non Seagrass"}
1973623	Ecological breeding of sea cucumber in seagrass comprises e.g. selecting sand bottom pond, washing silt bottom pond with water, solarizing, sowing cucumber forming ginseng feed, and plowing the cell bottom surface of sand once	NA	{"CHEN Z","HUANG G","LIU X","PENG Y","WANG Z","WEN X","YANG J","ZHOU Y"}	{"Non Seagrass"}
2545978	Golden carbon of Sargassum forests revealed as an opportunity for climate change mitigation	2020	{"Assis, Jorge","Bastos, Eduardo","Batista, Manuela","Carvalho, Vanessa F.","Duarte, Carlos M.","Gouvea, Lidiane P.","Gurgel, Carlos F. D.","Horta, Paulo A.","Peres, Leticia M. C.","Santos, Rui","Serrao, Ester A.","Silveira, Thiago C. L.","Sissini, Marina N."}	{"Non Seagrass","Non Zostera","Coastal Habitat"}
1976464	Seed-coat dormancy in Grevillea linearifolia: Little change in permeability to an apoplastic tracer after treatment with smoke and heat	2008	{"Briggs, Candida L.","Morris, E. Charles"}	{"Non Seagrass"}
1973488	Juvenile fish assemblages in temperate rocky reefs are shaped by the presence of macro-algae canopy and its three-dimensional structure	2017	{"Bianchimani, Olivier","Cheminee, Adrien","Cottalorda, Jean-Michel","Dominici, Jean-Marie","Francour, Patrice","Lejeune, Pierre","Pastor, Jeremy","Sala, Enric","Thiriet, Pierre"}	{"Non Seagrass"}
1973475	Resistance to nutrient enrichment varies among components in the Cymodocea nodosa community	2017	{"Brun, Fernando G.","Egea, Luis G.","Gonzalez-Ortiz, Vanessa","Jimenez-Ramos, Rocio","Jose Vergara, Juan","Lucas Perez-Llorens, Jose","Mancilla, Monique","Villazan, Beatriz"}	{"Non Zostera"}
1973360	N-2 fixation and primary productivity in a red sea Halophila stipulacea meadow exposed to seasonality	2018	{"Al-Rshaidat, M. M. D.","Bednarz, V. N.","Cardini, U.","Wild, C.","van Hoytema, N."}	{"Non Zostera"}
1977970	Transformation and exchange processes in the Bangrong mangrove forest-seagrass bed system, Thailand. Seasonal and spatial variations in benthic metabolism and sulfur biogeochemistry	1999	{"Andersen, FO","Holmboe, N","Holmer, M","Kristensen, E","Thongtham, N"}	{"Non Seagrass","Coastal Habitat"}
1974005	EFFECTS OF THE BOSCALID FUNGICIDE FILAN (R) ON THE MARINE AMPHIPOD ALLORCHESTES COMPRESSA AT ENVIRONMENTALLY RELEVANT CONCENTRATIONS	2016	{"Keough, Michael J.","Long, Sara M.","Pettigrove, Vincent J.","Vu, Hung T."}	{"Non Seagrass"}
1976351	Nursery function of mangrove: A comparison with mudflat in terms of fish species composition and fish diet	2008	{"Nip, T. H. M.","Tse, P.","Wong, C. K."}	{"Non Seagrass"}
1976849	Decomposition of dominant submerged macrophytes: implications for nutrient release in Myall Lake, NSW, Australia	2006	{"Asaeda, Takashi","Fujino, Takeshi","Sanderson, Brian","Shilla, Daniel"}	{"Non Seagrass"}
1975338	Commensal gut bacteria: distribution of Enterococcus species and prevalence of Escherichia coli phylogenetic groups in animals and humans in Portugal	2012	{"Goncalves, Alexandre","Igrejas, Gilberto","Poeta, Patricia","Silva, Nuno"}	{"Non Seagrass"}
1975679	Distribution differences and active habitat choices of invertebrates between macrophytes of different morphological complexity	2011	{"Axemar, Hanna","Hansen, Joakim P.","Kautsky, Lena","Wikstrom, Sofia A."}	{"Non Seagrass"}
1979220	ENVIRONMENTAL-CONTROL OF TURION FORMATION IN CURLY PONDWEED (POTAMOGETON-CRISPUS)	1980	{"SASTROUTOMO, SS"}	{"Non Seagrass"}
1974519	Matrix composition and patch edges influence plant-herbivore interactions in marine landscapes	2014	{"Alcoverro, Teresa","Gera, Alessandro","Pages, Jordi F.","Romero, Javier"}	{"Non Zostera"}
1978248	The community dynamics of epiphytic midge larvae across the pelagic-littoral interface: do animals respond to changes in the abiotic environment?	1997	{"Brady, VJ","Burton, TM","Cardinale, BJ"}	{"Non Seagrass","Non Zostera"}
1974866	First experimental evidence of corals feeding on seagrass matter	2013	{"Bouma, T. J.","Gillis, L. G.","Guest, J. R.","Lai, S.","Last, K. S.","Mueller, C.","Todd, P. A.","Ziegler, A. D."}	{"Non Seagrass"}
1973775	Exploring the acclimation to depth of Posidonia oceanica comparing the morphological variation to the histo-anatomical characteristics of the leaves	2017	{"Nicastro, S.","Passalacqua, N. G."}	{"Non Zostera","No Stressor/Restoration"}
1979072	THE INFLUENCE OF SEAGRASS COVER ON POPULATION-STRUCTURE AND INDIVIDUAL GROWTH-RATE OF A SUSPENSION-FEEDING BIVALVE, MERCENARIA-MERCENARIA	1984	{"DUNCAN, PB","PETERSON, CH","SUMMERSON, HC"}	{"No Stressor/Restoration"}
1978535	PREPARATION AND CHARACTERIZATION OF SUBCELLULAR-FRACTIONS SUITABLE FOR STUDIES OF XENOBIOTIC METABOLISM FROM LEAF SHEATHS OF A MARINE SEAGRASS - POSIDONIA-OCEANICA (LINNAEUS) DELILE	1995	{"HAMOUTENE, D","HOFMANN, P","LAFAURIE, M","MATHIEU, A","SALAUN, JP"}	{"Non Zostera","No Stressor/Restoration","No Restoration Mentioned","Coastal Habitat"}
1978862	PHOSPHORUS LIMITATION OF CYMODOCEA-NODOSA GROWTH	1991	{"DUARTE, CM","PEREZ, M","ROMERO, J","SANDJENSEN, K"}	{"Non Zostera"}
1973008	Isotopic evidence of connectivity between an inshore vegetated lagoon (nursery habitat) and coastal artificial reefs (adult habitats) for the reef fish Lethrinus lentjan on the Terengganu coast, Malaysia	2019	{"Dung Quang Le","Fui, Siau Yin","Ishimura, Toyoho","Piah, Rumeaida Mat","Sano, Yuji","Shirai, Kotaro","Tanaka, Kentaro"}	{"Non Seagrass"}
1976626	Iron additions reduce sulfide intrusion and reverse seagrass (Posidonia oceanica) decline in carbonate sediments	2007	{"Alvarez, Elvira","Calleja, Maria Ll.","Diaz-Almela, Elena","Duarte, Carlos M.","Holmer, Marianne","Marba, Nuria"}	{"Non Zostera"}
1978365	The germination characteristics of a population of Zannichellia palustris subsp pedicellata	1996	{"Bedini, S","Lombardi, T","Onnis, A"}	{"Non Seagrass","Non Zostera"}
1972626	Lytechinus	2020	{"Lawrence, John M.","McClintock, James B.","Watts, Stephen A."}	{"Non Seagrass"}
1978504	AN EXPERIMENTAL ASSESSMENT OF THE TEMPERATURE RESPONSES OF 2 SYMPATRIC SEAGRASSES, AMPHIBOLIS-ANTARCTICA AND AMPHIBOLIS-GRIFFITHII, IN RELATION TO THEIR BIOGEOGRAPHY	1995	{"CAMBRIDGE, ML","WALKER, DI"}	{"Non Zostera"}
1974487	Ecosystem Responses to Prescribed Fire Along a Chronosequence in a Subtropical Pine Rockland Habitat	2015	{"Dewsbur, Bryan M.","Fourqurean, James W.","Koptur, Uzanne"}	{"Non Seagrass"}
3233558	Studies in human malaria. XXII. Prolonged suppression of Chesson strain vivax malaria by the weekly administration of chlorguanide or chloroquine.	1950	{"Coatney, G. R.","Cooper, W. C.","Culwell, W. B.","Eyles, D. E.","Lints, H.","White, W. C."}	{"Non Seagrass"}
3233571	The natural history of Cumingia tellinoides	1927	{"Grave, BH"}	{"Non Seagrass"}
1975126	Drastic decadal decline of the seagrass Cymodocea nodosa at Gran Canaria (eastern Atlantic): Interactions with the green algae Caulerpa prolifera	2013	{"Espino, Fernando","Haroun, Ricardo","Hernandez-Zerpa, Harue","Tuya, Fernando"}	{"Non Zostera"}
1973876	In situ soft sediment nutrient enrichment: A unified approach to eutrophication field experiments	2016	{"Douglas, Emily J.","Hines, Laura V.","Kraan, Casper","Pilditch, Conrad A.","Thrush, Simon F."}	{"Non Seagrass"}
1973265	Population genetic subdivision of seagrasses, Syringodium isoetifolium and Thalassia hemprichii, in the Indonesian Archipelago	2018	{"Arlyza, Irma S.","Karl, Stephen A.","Wainwright, Benjamin J."}	{"Non Zostera"}
1976923	Water quality of the Madang Lagoon, Papua New Guinea: A status report	2006	{"Benet-Monico, Ariadna","Chatterton, Paul","Cornell, Sarah","Wilson, Lisette"}	{"Non Seagrass"}
1976397	Effects of acidification on carbon and nitrogen stable isotopes of benthic macrofauna from a tropical coral reef	2008	{"Frouin, Patrick","Kolasinski, Joanna","Rogers, Karyne"}	{"Non Seagrass","Coastal Habitat"}
1977949	Nitrogen fixation activity by periphytic blue-green algae in a seagrass bed on the Great Barrier Reef	2000	{"Iizumi, H","Yamamuro, M"}	{"Non Zostera"}
1974940	Clear, crashing, turbid and back - long-term changes in macrophyte assemblages in a shallow lake	2013	{"Adrian, Rita","Hilt, Sabine","Koehler, Jan","Monaghan, Michael T.","Sayer, Carl D."}	{"Non Seagrass"}
1974434	Proximal analysis of seagrass species from Laguna de Terminos, Mexico	2015	{"Coria-Monter, Erik","Duran-Campos, Elizabeth"}	{"Non Zostera"}
1978223	Seagrass epiphyte loads along a nutrient availability gradient, Florida Bay, USA (vol 159, pg 37, 1997)	1998	{"Fourqurean, JW","Frankovich, TA"}	{"Non Zostera"}
1978071	Evaluation of the nutrient budget in a seagrass bed	1999	{"Kishi, MJ","Oshima, Y","Sugimoto, T"}	{"Non Zostera","No Stressor/Restoration"}
1976343	Habitat continuity effects on gradients of fish biomass across marine protected area boundaries	2008	{"Bayle-Sempere, Just T.","Forcada, Aitor","Sanchez-Jerez, Pablo","Valle, Carlos"}	{"Non Zostera"}
1973293	Hypersalinity During Regional Drought Drives Mass Mortality of the Seagrass Syringodium filiforme in a Subtropical Lagoon	2018	{"Dunton, Kenneth H.","Wilson, Sara S."}	{"Non Zostera","No Restoration Mentioned"}
1973134	Dramatic loss of seagrass habitat under projected climate change in the Mediterranean Sea	2018	{"Chefaoui, Rosa M.","Duarte, Carlos M.","Serrao, Ester A."}	{"No Restoration Mentioned","Coastal Habitat"}
1979261	ALLELO-PARASITISM BETWEEN A SEAGRASS AND ALGAE	1978	{"DUCKER, SC","KNOX, RB"}	{"No Stressor/Restoration"}
2545915	Shallow coral reef community mapping and update on its ecological units using aerial images at Isla Arena, Colombian Caribbean	2020	{"Garcia-Uruena, Rocio","Peluffo, Duvan R. P.","Sierra-Escrigas, Silvia L."}	{"Non Seagrass","Coastal Habitat"}
1972531	Spatial variation of nutritional content in enhalus acoroides (L.f.) royle seeds and seed pods	2020	{"Ambo-Rappe, Rohani","Gatta, Ratnawati","Jompa, Jamaluddin","Nessa, Natsir"}	{"Non Zostera"}
1975446	Mass invasion of non-native Elodea canadensis Michx. in a large, clear-water, species-rich Norwegian lake - impact on macrophyte biodiversity	2012	{"Berge, Dag","Johansen, Stein W.","Lombardo, Paola","Mjelde, Marit"}	{"Non Zostera"}
1979187	1001 CAMPYLOBACTERS - CULTURAL-CHARACTERISTICS OF INTESTINAL CAMPYLOBACTERS FROM MAN AND ANIMALS	1980	{"BENJAMIN, J","SKIRROW, MB"}	{"Non Seagrass"}
1976104	Mesograzers in Posidonia oceanica meadows: an update of data on gastropod-epiphyte-seagrass interactions	2009	{"Costalago, David","Gacia, Esperanca","Piorno, Diana","Prado, Patricia","Tomas, Fiona"}	{"Non Zostera"}
1976256	The Role of Seaweed Bed for the Lower Trophic Ecosystem in Coastal Seas	2009	{"Hashimoto, Toshiya","Shimizu, Kenta","Yoshida, Goro"}	{"Non Seagrass"}
1975141	Evaluation of eelgrass debris as a food source for Apostichopus japonicas.	2013	{"Liu Xu-jia","Ru Shao-guo","Yang Hong-sheng","Zhou Yi"}	{"No Stressor/Restoration"}
1974391	Evidence of short-term burial response by benthic macrofauna associated with the Mediterranean seagrass Cymodocea nodosa	2015	{"Cebrian, Just","Dalrymple, D. Joseph","Darrow, Elizabeth S.","Ferrero-Vicente, L. M.","Heck, Kenneth L., Jr.","Luis Sanchez-Lizaso, Jose","Marco-Mendez, C.","Schrandt, Meagan N."}	{"Non Zostera"}
1975163	Impact of habitat environment on Potamogeton perfoliatus L. morphology and its within-plant variability in Lake Balaton	2013	{"Toth, Viktor R.","Vari, Agnes"}	{"Non Seagrass"}
1979225	KABARA CORAL-REEF COMPLEX (LAU, FIJI) - GEOMORPHOLOGY, BIOLOGY AND SOCIO-ECOLOGY	1979	{"GALZIN, R","RICARD, M","RICHARD, G","SALVAT, B","TOFFART, JL"}	{"No Stressor/Restoration","No Restoration Mentioned"}
1972488	Spatio-Temporal Changes in Basal Food Source Assimilation by Fish Assemblages in a Large Tropical Bay in the SW Atlantic Ocean	2020	{"Alvarez, Heiddy Marquez","Condini, Mario Vinicius","Garcia, Adna Ferreira Silva","Garcia, Alexandre Miranda","Santos, Alexandre Clistenes Alcantara","Santos, Edjane Pereira","de Moraes, Leonardo Evangelista"}	{"Non Seagrass"}
1978788	THE INFLUENCE OF TEMPERATURE ON SEASONAL-VARIATION OF CAULERPA-PROLIFERA (FORSSKAL) LAMOUROUX PHOTOSYNTHESIS AND RESPIRATION	1992	{"ROS, JD","TERRADOS, J"}	{"Non Zostera"}
1978067	Age and growth of the fan mussel Pinna nobilis from south-east Spanish Mediterranean seagrass (Posidonia oceanica) meadows	1999	{"Duarte, CM","Kennedy, DP","Kennedy, H","Proud, SV","Richardson, CA"}	{"Non Zostera"}
1976300	Interspecific variation in the elemental and stable isotope content of seagrasses in South Florida	2009	{"Campbell, Justin E.","Fourqurean, James W."}	{"Non Zostera"}
1975291	Physiological response and photoacclimation capacity of Caulerpa prolifera (Forsskal) J.V. Lamouroux and Cymodocea nodosa (Ucria) Ascherson meadows in the Mar Menar lagoon (SE Spain)	2012	{"Dominguez, Belen","Figueroa, Felix L.","Garcia-Sanchez, Marta","Korbee, Nathalie","Marcos, Concepcion","Perez-Ruzafa, Angel","Perez-Ruzafa, Isabel Ma"}	{"Non Zostera"}
1976873	Animal-plant-microbe interactions: direct and indirect effects of swan foraging behaviour modulate methane cycling in temperate shallow wetlands	2006	{"Bodelier, Paul L. E.","Klaassen, Marcel","Laanbroek, Hendrikus J.","Santamaria, Luis","Stomp, Maayke"}	{"Non Seagrass"}
1974679	Long-term dynamics of macrophyte dominance and growth-form types in two north-west German lowland streams	2014	{"Broering, Udo","Brux, Holger","Filetti, Mirko","Herr, Wolfgang","Wiegleb, Gerhard"}	{"Non Seagrass"}
1976504	THE IMPACTS OF WIND FARMS ON ANIMAL SPECIES	2008	{"Jana, Sterze","Pogacnik, M."}	{"Non Seagrass"}
1977008	Fluid dynamics in seagrass ecology - from molecules to ecosystems	2006	{"Ackerman, Joseph D.","BE Larkum, AW","Duarte, CM","Koch, Evamaria W.","Orth, RJ","Verduin, Jennifer","van Keulen, Michael"}	{"No Stressor/Restoration"}
1972996	Recent Large Scale Environmental Changes in the Mediterranean Sea and Their Potential Impacts on Posidonia Oceanica	2019	{"Aniskiewicz, Paulina","Stramska, Malgorzata"}	{"Non Zostera"}
1972894	Heat-stress induced flowering can be a potential adaptive response to ocean warming for the iconic seagrass Posidonia oceanica	2019	{"Entrambasaguas, Laura","Marin-Guirao, Lazaro","Procaccini, Gabriele","Ruiz, Juan M."}	{"Non Zostera"}
1979084	NAJAS-MARINA IN ISRAEL - IS IT A HALOPHYTE OR A GLYCOPHYTE	1984	{"AGAMI, M","ESHEL, A","WAISEL, Y"}	{"Non Seagrass"}
1975413	Coastal Wetlands of Chesapeake Bay	2012	{"BE Batzer, DP","Baldwin, AH","Baldwin, Andrew H.","Kangas, Patrick J.","Megonigal, J. Patrick","Perry, Matthew C.","Whigham, Dennis F."}	{"Non Seagrass","Coastal Habitat"}
1975856	Reproduction and growth of the endangered siphonariid limpet Siphonaria compressa (Pulmonata: Basommatophora)	2010	{"Allanson, B. R.","Msizi, S. C."}	{"Non Seagrass","Coastal Habitat"}
1973276	Photosynthetic and antioxidant responses of the tropical intertidal seagrasses Halophila ovalis and Thalassia hemprichii to moderate and high irradiances	2018	{"Buapet, Pimchanok","Phandee, Surangkana"}	{"Non Zostera"}
1978962	TUBER SIZE AND PLANTING DEPTH INFLUENCE GROWTH OF POTAMOGETON-PECTINATUS L	1987	{"SPENCER, DF"}	{"Non Seagrass"}
1977350	Reply to B.E. Lapointe and P.J Barile (2004). Comment on J. C. Zieman, J. W. Fourqurean, and T. A Frankovich. 1999. Seagrass die-off in Florida Bay: Long-term trends in abundance and growth of turtle grass, Thalassia testudinum. Estuaries 22 : 460-470.	2004	{"Fourqurean, JW","Frankovich, TA","Zieman, JC"}	{"Non Zostera"}
1973372	Analysis of optimal habitat for captive release of the sea cucumber Holothuria scabra	2018	{"Ceccarelli, Daniela M.","Logan, Murray","Purcell, Steven W."}	{"Non Zostera"}
1974949	Adaptation of fish farming production to the environmental characteristics of the receiving marine ecosystems: A proxy to carrying capacity	2013	{"Kalantzi, Ioanna","Karakassis, Ioannis","Koutsikopoulos, Constantin","Papageorgiou, Nafsika","Sevastou, Katerina"}	{"Non Seagrass"}
2099987	Heat wave intensity can vary the cumulative effects of multiple environmental stressors on Posidonia oceanica seedlings	2020	{"Guerrero-Meseguer, Laura","Marin, Arnaldo","Sanz-Lazaro, Carlos"}	{"Non Zostera"}
1977460	Benthic cyanobacterial, Microcoleus lyngbyaceus, blooms in shallow, inshore Puerto Rican Seagrass habitats, Caribbean sea	2003	{"Ballantine, DL","Stielow, S"}	{"Non Zostera"}
1977670	Depth-acclimation of photosynthesis, morphology and demography of Posidonia oceanica and Cymodocea nodosa in the Spanish Mediterranean Sea	2002	{"Duarte, CM","Enriquez, S","Olesen, B","Sand-Jensen, K"}	{"Non Zostera"}
1977933	Role of nutrient runoff in altering downstream ecosystems: Florida Bay, FL, USA	2000	{"Zimba, Paul V."}	{"Non Zostera"}
1977267	Timing of recruitment events, residence periods and post-settlement growth of juvenile fish in a seagrass nursery area, south-eastern Australia	2004	{"Sinerchia, M","Smith, KA"}	{"No Stressor/Restoration"}
1978087	Leaf dynamics and shoot production of the seagrass Thalassia testudinum in the Indian River Lagoon (Florida)	1999	{"Gacia, E"}	{"Non Zostera"}
1972656	Temperature, pH, DO, and salinity data from Mumford Cove, Connecticut, USA from 2015-2020	2020	{"Baumann, Hannes"}	{"No Stressor/Restoration","Coastal Habitat"}
1977490	The use of mechanistic descriptions of algal growth and zooplankton grazing in an estuarine eutrophication model	2003	{"Baird, ME","Parslow, JS","Walker, SJ","Wallace, BB","Webster, IT"}	{"Non Zostera"}
1974742	Variability in the structure of epiphytic microalgae assemblages on the leaves of Posidonia oceanica in relation to human disturbance in a meadow off Tunisia	2014	{"Ben Brahim, Mounir","Bradai, Med-Najmeddine","Hamza, Asma","Mabrouk, Lotfi","Mahfoudhi, Mabrouka"}	{"Non Zostera"}
1976083	Declines in predatory fish promote bloom-forming macroalgae	2009	{"Eriksson, Britas Klemens","Johansson, Gustav","Ljunggren, Lars","Mattila, Johanna","Raberg, Sonja","Rubach, Anja","Sandstrom, Alfred","Snickars, Martin"}	{"Non Seagrass"}
1977817	Assessment of the sea cucumber (Echinodermata : Holothuroidea) as potential fishery resource in Banco Chinchorro, Quintana Roo, Mexico	2001	{"Herrero-Perezrul, MD","Sosa-Cordero, E","de Jesus-Navarrete, A","de la Fuente-Betancourt, MG"}	{"Non Seagrass"}
1977892	Effects of nutrient enrichment and small predator density on seagrass ecosystems: An experimental assessment	2000	{"Coen, LD","Heck, KL","Pennock, JR","Sklenar, SA","Valentine, JF"}	{"Non Zostera"}
1978451	Destructive hydrogen peroxide production in Eucheuma denticulatum (Rhodophyta) during stress caused by elevated pH, high light intensities and competition with other species	1995	{"Collen, J","Mtolera, MSP","Pedersen, M","Semesi, AK"}	{"Non Zostera","No Restoration Mentioned"}
1976481	Isotopic ratios and elemental contents as indicators of seagrass C processing and sewage influence in a tropical macrotidal ecosystem (Madagascar, Mozambique Channel)	2008	{"Frederich, Bruno","Gobert, Sylvie","Lepoint, Gilles","Parmentier, Eric"}	{"Non Zostera"}
1974837	Long term state of coastal lagoons in Veracruz, Mexico: Effects of land use changes in watersheds on seagrasses habitats	2014	{"Herrera-Silveira, Jorge","Ibarra-Obando, Silvia E.","Moreno-Casasola, Patricia","Rivera-Guzman, Nadia E.","Sosa, Vinicio J."}	{"Non Zostera","No Restoration Mentioned"}
1978412	Growth and carbon utilization by sprouted propagules of two species of submersed rooted aquatic plants grown in darkness	1996	{"Ksander, GG","Spencer, DF"}	{"Non Seagrass"}
1975236	Global analysis of satellite tracking data shows that adult green turtles are significantly aggregated in Marine Protected Areas	2012	{"Adnyana, Windia","Blumenthal, Janice M.","Broderick, Annette C.","Canbolat, Ali Fuat","Catry, Paulo","Ciccione, Stephane","Coyne, Michael S.","Delcroix, Eric","Godley, Brendan J.","Hitipeuw, Creusa","Hodgson, David J.","Luschi, Paolo","Pendoley, Kellie","Pet-Soede, L.","Rees, Alan F.","Richardson, Peter B.","Scott, Rebecca","Witt, Matthew J."}	{"Non Seagrass"}
1976009	Elemental composition and productivity of cyanobacterial mats in an arid zone estuary in north Western Australia	2010	{"Adame, Maria Fernanda","Grinham, Alistair","Lovelock, Catherine E.","Penrose, Helen M."}	{"Non Seagrass"}
1974874	Biogeochemical responses to nutrient inputs in a Cuban coastal lagoon: runoff, anthropogenic, and groundwater sources	2013	{"Castillo-Sandoval, F. S.","Gonzalez-De Zayas, R.","Merino-Ibarra, M.","Soto-Jimenez, M. F."}	{"Non Zostera"}
1977351	Food choice in Siganus fuscescens: influence of macrophyte nutrient content and availability	2004	{"Franklin, CE","Pillans, RD","Tibbetts, IR"}	{"Non Seagrass"}
1976509	Species composition and seasonal changes in macroalgal blooms in lagoons along the southeastern Gulf of California	2008	{"Ochoa-Izaguirre, Maria Julia","Paez-Osuna, Federico","Pinon-Gimate, Alejandra","Serviere-Zaragoza, Elisa"}	{"Non Seagrass","Non Zostera","Coastal Habitat"}
1973866	The exchange of dissolved nutrients between the water column and substrate pore-water due to hydrodynamic adjustment at seagrass meadow edges: A flume study	2016	{"Adhitya, A.","Bouma, T. J.","Folkard, A. M.","Govers, L. L.","Herman, P. M. J.","de Iongh, H. H.","van Katwijk, M. M."}	{"No Stressor/Restoration"}
1977595	Quantitative aspects of inorganic nutrient fluxes in the Gazi Bay (Kenya): implications for coastal ecosystems	2002	{"Jumba, IO","Mwashote, BM"}	{"Non Zostera","No Restoration Mentioned"}
1976677	Mangroves as essential nursery habitat for goliath grouper (Epinephelus itajara)	2007	{"Coleman, Felicia C.","Eklund, Anne-Marie","Koenig, Christopher C.","Schull, Jennifer","Ueland, Jeffrey"}	{"Non Seagrass"}
1979311	BISCAYNE BAY FLORIDA USA ITS ENVIRONMENT AND PROBLEMS	1974	{"BEARDSLEY G L","ROESSLER M A"}	{"Non Zostera"}
1977825	Report of the Working Group on Zooplankton Ecology and joint meeting with Working Group on Phytoplankton Ecology, Bergen, Norway, 26-29 March 2001.	2001	{Anonymous}	{"Non Seagrass"}
1972784	The highly diverse gastropod assemblages associated with Sargassum spp. (Phaeophyceae: Fucales) habitats	2019	{"Dos Santos Longo, Pedro Augusto","Passos, Flavio Dias","Pereira Leiter, Fosca Pedini","Ribeiro Mansur, Karine Ferreira"}	{"Non Zostera"}
1977461	Carbon and nitrogen stable isotopic variation in Laguncularia racemosa (L.) (white mangrove) from Florida and Belize: implications for trophic level studies	2003	{"Fogel, M","Jacobson, M","Smallwood, B","Wooller, M"}	{"Non Seagrass","Non Zostera","No Restoration Mentioned"}
1973233	Differences in trophic resources and niches of two juvenile predatory species in three Pangani estuarine zones, Tanzania: stomach contents and stable isotope approaches	2018	{"Machiwa, John Ferdinand","Mwijage, Alistidia Paul","Shilla, Daniel Abel"}	{"Non Seagrass","Non Zostera","No Stressor/Restoration","No Restoration Mentioned"}
1973447	Carbon Stocks of Coastal Wetland Ecosystems on Hainan Island, China	2018	{"Ding, Dongjing","Gao, Tianlun","Guan, Wei","Liao, Baowen"}	{"No Stressor/Restoration"}
1975101	Antifouling activity of the methanolic extract of Syringodium isoetifolium, and its toxicity relative to tributyltin on the ovarian development of brown mussel Perna indica	2013	{"Anantharaman, P.","Immanuel, G.","Iyapparaj, P.","Palavesam, A.","Prakash, S.","Ramasubburayan, R.","Revathi, P."}	{"Non Zostera"}
1975472	Nitrogen-rich groundwater intrusion affects productivity, but not herbivory, of the tropical seagrass Thalassia testudinum	2012	{"Gobler, Christopher J.","Peterson, Bradley J.","Stubler, Amber D.","Wall, Charles C."}	{"Non Zostera"}
1979277	NITROGEN-FIXATION (ACETYLENE-REDUCTION) ASSOCIATED WITH SEA-URCHINS "(STRONGYLOCENTROTUS-DROEBACHIENSIS) FEEDING ON SEAWEEDS AND EELGRASS	1977	{"FONG, W","GUERINOT, ML","PATRIQUIN, DG"}	{"Non Seagrass"}
1974065	Spectroscopic aperture biases in inside-out evolving early-type galaxies from CALIFA	2016	{"Bland-Hawthorn, J.","Bomans, D. J.","Breda, I.","Catalan-Torrecilla, C.","Galbany, L.","Garcia-Benito, R.","Gomes, J. M.","Gonzalez Delgado, R. M.","Iglesias-Paramo, J.","Kehrig, C.","Lehnert, M. D.","Lopez-Sanchez, A. R.","Marino, R. A.","Marquez, I.","Molla, M.","Papaderos, P.","Rosales-Ortega, F. F.","Sanchez, S. F.","Vilchez, J. M.","Walcher, C. J.","Ziegler, B.","del Olmo, A.","dos Reis, S…	{"Non Seagrass"}
1975682	Environmental relationships of aquatic vegetation in the fresh water ecosystem of the Nile Delta, Egypt	2011	{"El-Fiky, Abdel M.","El-Ghani, Monier Abd","Khattab, Adel","Soliman, Ashraf"}	{"Non Seagrass"}
1976165	Compensatory growth in an aquatic plant mediates exploitative competition between seasonally tied herbivores	2009	{"Hidding, Bert","Klaassen, Marcel","Nolet, Bart A.","de Boer, Thijs","de Vries, Peter P."}	{"Non Seagrass"}
1972946	Herbivory and resource availability shift plant defense and herbivore feeding choice in a seagrass system	2019	{"Castejon, Ines","Hernan, Gema","Terrados, Jorge","Tomas, Fiona"}	{"Non Zostera"}
1975400	Estimation of the Genetic Composition of a Near-Threatened Tidal Marsh Plant, Carex rugulosa, in Japan	2012	{"Hodoki, Yoshikuni","Kunii, Hidenobu","Ohbayashi, Kako"}	{"Non Seagrass"}
1974329	Fungal Community Successions in Rhizosphere Sediment of Seagrasses Enhalus acoroides under PAHs Stress	2015	{"Dong, Junde","Jiang, Yufeng","Ling, Juan","Wang, Youshao","Wu, Meilin","Yang, Qingsong","Zeng, Siquan","Zhang, Yanying"}	{"Non Zostera"}
1972562	Habitat associations and seasonal abundance patterns of the sea cucumber Holothuria arguinensis at Ria Formosa coastal lagoon (South Portugal)	2020	{"Dominguez-Godino, Jorge A.","Gonzalez-Wanguemert, Mercedes"}	{"Non Seagrass"}
1974796	Anatomical features of Cymodocea nodosa growing in Montenegro (Adriatic Sea)	2014	{"Macic, Vesna"}	{"Non Zostera"}
1974571	Integrating Organismal and Population Responses of Estuarine Fishes in Macondo Spill Research	2014	{"Able, Kenneth W.","Fodrie, F. Joel","Galvez, Fernando","Heck, Kenneth L., Jr.","Jensen, Olaf P.","Lopez-Duarte, Paola C.","Martin, Charles W.","Turner, R. Eugene","Whitehead, Andrew"}	{"Non Seagrass"}
1978288	A production model for Posidonia oceanica based on temperature	1997	{"Buia, MC","Mazzella, L","Zupo, V"}	{"Non Zostera"}
1974163	ESTABLISHMENT AND OVERWINTERING OF BAY SCALLOPS (ARGOPECTEN IRRADIANS LAMARCK) IN A GULF OF ST. LAWRENCE ESTUARY	2015	{"Macinnis, Gina","Polk, Zephyr C. S.","Smit, Laura A.","Williams, Jim"}	{"Non Seagrass"}
1973610	Temporal changes in seagrass beds of Sanriku Coast before and after the Great East Japan Earthquake	2017	{"Komatsu, Teruhisa","Muraoka, Daisuke","Nakaoka, Masahiro","Tamaki, Hitoshi","Tanaka, Norio","Tokuoka, Makoto"}	{"Coastal Habitat"}
1972550	Rhizosphere Microbial Community Structure Is Selected by Habitat but Not Plant Species in Two Tropical Seagrass Beds	2020	{"Huang, Xiaoping","Jiang, Zhijian","Liu, Songlin","Wu, Yunchao","Yu, Shuo","Zhang, Xia","Zhao, Chunyu"}	{"Non Zostera"}
1978592	MERCURY UPTAKE FROM CONTAMINATED WATER AND SEDIMENT BY THE ROOTED AND SUBMERGED AQUATIC MACROPHYTE ERIOCAULON-SEPTANGULARE	1994	{"COQUERY, M","WELBOURN, PM"}	{"Non Zostera"}
1978480	NUTRIENT AND GRAZING INFLUENCES ON A SUBTROPICAL SEAGRASS COMMUNITY	1995	{"MCGLATHERY, KJ"}	{"Non Zostera"}
1974922	Incorporation of diet information derived from Bayesian stable isotope mixing models into mass-balanced marine ecosystem models: A case study from the Marennes-Oleron Estuary, France	2013	{"DeWitt, Theodore H.","Lebreton, Benoit","Niquil, Nathalie","Pacella, Stephen R.","Phillips, Donald","Richard, Pierre"}	{"Non Zostera"}
1972706	Exceptionally species-rich assemblages of modern larger benthic foraminifera from nearshore reefs in northern Palawan (Philippines)	2019	{"Foerderer, Meena","Langer, Martin R."}	{"Non Seagrass"}
1974199	H+-pyrophosphatase from Salicornia europaea confers tolerance to simultaneously occurring salt stress and nitrogen deficiency in Arabidopsis and wheat	2015	{"Bao, Hexigeduleng","Chen, Xianyang","Fan, Pengxiang","Feng, Juanjuan","Jiang, Ping","Li, Yinxin","Lv, Sulian","Nie, Lingling","Tai, Fang","Wang, Duoliya","Wang, Jinhui"}	{"Non Seagrass"}
1979159	SEDIMENT-BASED NUTRITION OF SUBMERSED MACROPHYTES	1981	{"BARKO, JW","SMART, RM"}	{"Non Seagrass"}
1973899	Functioning and dysfunctioning of marine and brackish ecosystems - A Bay of Biscay perspective	2016	{"Anschutz, Pierre","Bachelet, Guy","Gillet, Herve"}	{"Non Seagrass"}
1977969	Hammarsjon - The Bog King's lake	2000	{"Olsson, K.-A."}	{"Non Seagrass"}
1976890	Trophic cascades uncoupled in a coastal marsh ecosystem	2006	{"Cardona, L"}	{"Non Seagrass"}
1974467	Climate Change and Coastal Ecosystems Long-Term Effects of Climate and Nutrient Loading on Trophic Organization Preface	2015	{"BA Livingston, RJ","Kennish, Michael J."}	{"Non Seagrass","Non Zostera","No Stressor/Restoration","No Restoration Mentioned"}
1973827	Essential requirements for catchment sediments to have ongoing impacts to water clarity in the great barrier reef	2016	{"Gibbs, Mark T."}	{"Non Seagrass"}
1976557	Seychelles Lagoon provides corals with a refuge from bleaching.	2008	{"Chadwick, Nanette E.","Dubinsky, Zvy","Hoffman, Razi","Iluz, David","Vago, Razi"}	{"Non Zostera"}
1975714	Seagrass Meadows Modify Drag Forces on the Shell of the Fan Mussel Pinna nobilis	2011	{"Bouma, Tjeerd J.","Cabanellas-Reboredo, Miguel","Deudero, Salud","Duarte, Carlos M.","Hendriks, Iris E."}	{"Non Zostera"}
1973401	Low Light Availability Alters Root Exudation and Reduces Putative Beneficial Microorganisms in Seagrass Roots	2018	{"Gleeson, Deirdre","Grierson, Pauline","Kendrick, Gary A.","Martin, Belinda C.","Ryan, Megan H.","Siebers, Andre R.","Statton, John"}	{"Non Zostera"}
1975855	ARTIFICIAL REEFS CONCENTRATE NUTRIENTS AND ALTER BENTHIC COMMUNITY STRUCTURE IN AN OLIGOTROPHIC, SUBTROPICAL ESTUARY	2010	{"Dewsbury, Bryan M.","Fourqurean, James W."}	{"Non Zostera","No Restoration Mentioned"}
1976418	A review of epiphyte community development: Surface interactions and settlement on seagrass	2008	{"Hanna, Richard","Michael, Teena S.","Shin, Hyun Woung","Spafford, David C."}	{"Non Zostera"}
1975736	Linking Anthropogenic Activities and Eutrophication in Estuaries: The Need of Reliable Indicators	2011	{"BE Ansari, AA","Castro, Paula","Freitas, Helena","Gill, SS","Lanza, GR","Rast, W"}	{"Non Seagrass"}
1973146	How do food sources drive meiofauna community structure in soft-bottom coastal food webs?	2018	{"Asmus, H.","Asmus, R. M.","Beaugeard, L.","Breret, M.","Fichet, D.","Kadel, P.","Lebreton, B.","Rzeznik-Orignac, J.","van der Heijden, L. H."}	{"Non Seagrass"}
1977276	Population structure and inbreeding vary with successional stage in created Spartina alterniflora marshes	2004	{"Proffitt, CE","Ritland, K","Travis, SE"}	{"Non Seagrass"}
1974030	Rhizosphere Microbiomes of European Seagrasses Are Selected by the Plant, But Are Not Species Specific	2016	{"Costa, Rodrigo","Cucio, Catarina","Engelen, Aschwin H.","Muyzer, Gerard"}	{"No Stressor/Restoration"}
1977168	Home range behaviour of the monogamous Australian seahorse, Hippocampus whitei	2005	{"Evans, KL","Marsden, AD","Vincent, ACJ"}	{"Non Seagrass"}
1977355	Attenuation of water flow inside seagrass canopies of differing structure	2004	{"Luettich, RA","Micheli, F","Peterson, CH","Skilleter, GA"}	{"Non Zostera","No Stressor/Restoration","No Restoration Mentioned"}
1972659	Importance of intertidal seagrass beds as nursery area for coral reef fish juveniles (Mayotte, Indian Ocean)	2020	{"Bertucci, Frederic","Gache, Camille","Galzin, Rene","Jorissen, Hendrikje","Lecchini, David","Moussa, Rakamaly Madi","Parravicini, Valeriano","Waqalevu, Viliame Pita"}	{"No Stressor/Restoration"}
1972891	Sulfur-Oxidizing Symbionts without Canonical Genes for Autotrophic CO2 Fixation	2019	{"Antony, Chakkiath Paul","Dubilier, Nicole","Erb, Tobias J.","Gruber-Vodicka, Harald R.","Huettel, Bruno","Kleiner, Manuel","Kouris, Angela","Liebeke, Manuel","Seah, Brandon K. B.","Zarzycki, Jan","von Borzyskowski, Lennart Schada"}	{"Non Zostera"}
1979201	FEEDING HABIT OF YEARLING RED SEA BREAM PAGRUS-MAJOR IN YUYA BAY JAPAN	1980	{"OMORI M"}	{"Non Seagrass"}
1974798	Ecology	2014	{"BA Hoppenrath, M","Chomerat, N","Chomerat, Nicolas","Hoppenrath, Mona","Horiguchi, T","Horiguchi, Takeo","Murray, SA","Murray, Shauna A."}	{"Non Seagrass"}
1979199	NITROGEN-FIXATION (ACETYLENE-REDUCTION) IN SHALLOW-WATER BAHAMIAN ENVIRONMENTS	1980	{"GOLDNER, LL"}	{"Non Seagrass"}
1979216	NUTRITION AND GRAZING BEHAVIOR OF THE GREEN TURTLE CHELONIA-MYDAS	1980	{"BJORNDAL, KA"}	{"Non Seagrass","Non Zostera"}
1978006	Hydrology, groundwater chemistry and peat chemistry in relation to habitat conditions in a mire on the South-eastern Alps of Italy	1999	{"Bragazza, L","Gerdol, R"}	{"Non Seagrass"}
1978478	FOOD-HABITS OF ESTUARINE STAGHORN SCULPIN, LEPTOCOTTUS-ARMATUS, WITH FOCUS ON CONSUMPTION OF JUVENILE DUNGENESS CRAB, CANCER-MAGISTER	1995	{"ARMSTRONG, DA","ARMSTRONG, JL","MATHEWS, SB"}	{"Non Zostera","No Restoration Mentioned"}
1978414	Salt-marshes and intertidal habitats of the Jubail Marine Wildlife Sanctuary: Extent of oil-impacted areas and estimated losses of above-ground plant biomass following the 1991 Gulf War oil spill	1996	{"Abuzinada, A. H.","BE Krupp, F.","Nader, I. A.","Warnken, Jan"}	{"Non Seagrass"}
1976400	Epiphyte load on the seagrass Posidonia oceanica (L.) Delile does not indicate anthropogenic nutrient loading in Cabrera Archipelago National Park (Balearic Islands, Western Mediterranean)	2008	{"Medina Pons, Francisco Javier","Terrados, Jorge"}	{"Non Zostera"}
1974196	Hotspots of predation persist outside marine reserves in the historically fished Mediterranean Sea	2015	{"Alcoverro, Teresa","Arthur, Rohan","Boada, Jordi","Farina, Simone","Mascaro, Oriol","Romero, Javier","Santana, Yaiza"}	{"Non Seagrass"}
1976818	Phosphorus concentration in sediment, water and tissues of three submerged macrophytes of Myall Lake, Australia	2006	{"Asaeda, Takashi","Kian, Siong","Lalith, Rajapakse","Manatunge, Jagath","Shilla, Daniel Abel"}	{"Non Seagrass","Coastal Habitat"}
1978308	Seagrass epiphyte loads along a nutrient availability gradient, Florida Bay, USA	1997	{"Fourqurean, JW","Frankovich, TA"}	{"Non Zostera"}
1978626	GROWTH RATE OF ADULT SEA URCHINS, PARACENTROTUS-LIVIDUS IN A LAGOON ENVIRONMENT - THE EFFECT OF DIFFERENT DIET TYPES	1994	{"BE David, B","CALTAGIRONE, A","FERNANDEZ, C","Feral, JP","Guille, A","Roux, M"}	{"Non Zostera"}
1977062	Expression of sucrose synthase genes involved in enhanced elongation of pondweed (Potamogeton distinctus) turions under anoxia	2005	{"Harada, T","Ishizawa, K","Satoh, S","Yoshioka, T"}	{"Non Seagrass","Non Zostera","No Restoration Mentioned","Coastal Habitat"}
1976815	The use of surface alkaline phosphatase activity in the seagrass Posidonia oceanica as a biornarker of eutrophication	2006	{"Alcoverro, Teresa","Martinez-Crego, Begona","Romero, Javier"}	{"Non Zostera"}
1977148	The potential role of plant oxygen and sulphide dynamics in die-off events of the tropical seagrass, Thalassia testudinum	2005	{"Borum, J","Fourqurean, JW","Frankovich, TA","Greve, TM","Madden, CJ","Pedersen, O","Zieman, JC"}	{"Non Zostera"}
1976964	A simple, inexpensive and large volume pore water sampler for sandy and muddy substrates	2006	{"Bryars, S","Cheshire, AC","Miller, D","Nayar, S"}	{"Non Seagrass"}
1975066	Evaluation of posidonia seaweed-based compost as a substrate for melon and tomato seedling production	2013	{"Bustamante, M. A.","Medina, E.","Mininni, C.","Montesano, F.","Moral, R.","Paredes, C.","Perez-Espinosa, A.","Santamaria, P."}	{"Non Seagrass"}
1978141	Marine turtle populations on the west-central coast of Florida: Results of tagging studies at the Cedar Keys, Florida, 1986-1995	1998	{"Schmid, JR"}	{"Non Seagrass","Non Zostera"}
1979273	LIMITATIONS ON MACROPHYTES IN A EUTROPHIC LAKE, LOCH LEVEN .1. EFFECTS OF PHYTOPLANKTON	1977	{"JUPP, BP","SPENCE, DHN"}	{"Non Seagrass"}
1974496	Mixed stock analysis of a resident green turtle, Chelonia mydas, population in New Caledonia links rookeries in the South Pacific	2015	{"Chateau, Olivier","Farman, Richard","FitzSimmons, Nancy N.","Jensen, Michael P.","Keller, Florent","Limpus, Colin J.","MacKay, Kenneth T.","Petro, George","Read, Tyffen C.","Wantiez, Laurent","Werry, Jonathan"}	{"Non Seagrass"}
1976916	Growth rates of juvenile pinfish (Lagodon rhomboides): Effects of habitat and predation risk	2006	{"Harter, Stacey L.","Heck, Kenneth L., Jr."}	{"Non Seagrass"}
1974807	Pacific herring Clupea pallasii and wrack macrophytes subsidize semi- terrestrial detritivores	2014	{"El-Sabaawi, Rana","Fox, Caroline H.","Paquet, Paul C.","Reimchen, Thomas E."}	{"No Stressor/Restoration"}
1976661	Physiological responses of the seagrass Posidonia oceanica to elevated organic matter content in sediments: An experimental assessment	2007	{"Frederiksen, Morten S.","Holmer, Marianne","Invers, Olga","Manuel Ruiz, Juan","Perez, Marta"}	{"Non Zostera"}
1978661	NUTRIENT CYCLING AND FOODWEBS IN DUTCH ESTUARIES	1993	{"NIENHUIS, PH"}	{"Non Seagrass"}
1979001	RESTORATION OF 2 LOWLAND LAKES BY ISOLATION FROM NUTRIENT-RICH WATER SOURCES WITH AND WITHOUT REMOVAL OF SEDIMENT	1986	{"BALLS, H","IRVINE, K","MOSS, B","STANSFIELD, J"}	{"Non Seagrass","Coastal Habitat"}
1973718	Drivers of phytoplankton dynamics in old Tampa Bay, FL (USA), a subestuary lagging in ecosystem recovery	2017	{"Corcoran, Alina A.","Ivey, James","Leone, Erin","Murasko, Susan","Wolny, Jennifer"}	{"Non Seagrass"}
1978212	Interrelationships of fish and channel environmental conditions with aquatic macrophytes in an Argentine irrigation system	1998	{"Cazorla, AL","Domaniewski, JCJ","Fernandez, OA","Irigoyen, JH","Lazzari, MA","Murphy, KJ","Sabbatini, MR"}	{"Non Seagrass"}
1973181	"Posidonia meadows calling': a ubiquitous fish sound with monitoring potential	2018	{"Boissery, Pierre","Di Iorio, Lucia","Gervaise, Cedric","Parmentier, Eric","Raick, Xavier","Valentini-Poirier, Cathy-Anna"}	{"Non Zostera"}
1979285	CONSUMER ECOLOGY OF SEAGRASS BEDS	1977	{"KIKUCHI T","PERES J M"}	{"No Stressor/Restoration"}
1978734	SUBTIDAL BENTHIC COMMUNITY RESPIRATION AND PRODUCTION NEAR THE HEAVILY OILED GULF-COAST OF SAUDI-ARABIA	1993	{"BURNS, KA","EHRHARDT, MG","HOWES, BL","TAYLOR, CD"}	{"Non Zostera"}
2545931	Fukui foldable traps versus fyke nets as options for fishing European green crabs (Carcinus maenas) in soft-bottom habitats: Exploring efficiency and limiting bycatch	2020	{"Flynn, Paula Tummon","Gehrels, Hannah","Poirier, Luke A.","Quijon, Pedro A."}	{"Non Seagrass"}
1979252	DECOMPOSITION OF AQUATIC ANGIOSPERMS .3. ZOSTERA-MARINA L AND A CONCEPTUAL-MODEL OF DECOMPOSITION	1978	{"GODSHALK, GL","WETZEL, RG"}	{"No Stressor/Restoration"}
1978107	ETS-activity as a measure of vitality of different macrophyte species	1999	{"Gaberscik, A","Mazej, Z"}	{"Non Seagrass"}
1975409	The Holocene decline of slender naiad (Najas flexilis (Willd.) Rostk. & WLE Schmidt) in NE Poland in the light of new palaeobotanical data	2012	{"Galka, Mariusz","Kolaczek, Piotr","Tobolski, Kazimierz"}	{"Non Zostera"}
1975776	Estuary Ecosystem Models	2011	{"BE Jorgensen, SE","Marques, Joao C.","Martins, Irene"}	{"No Stressor/Restoration"}
1973620	Time to cash in on positive interactions for coral restoration	2017	{"Shaver, Elizabeth C.","Silliman, Brian R."}	{"Non Seagrass"}
1972884	Prediction of potential distribution areas of Chinese horseshoe crab and mangrove horseshoe crab in the Beibu Gulf of Guangxi based on MAXENT model and their population conservation strategies.	2019	{"Jie, Song","Menghong, Hu","Mingyan, Yan","Qiongzhen, Li","Youji, Wang","Zhenhua, Wang"}	{"No Stressor/Restoration"}
1974252	Spatial Distribution Trend of Plankton in Sungai Pulai Estuary, the Straits of Johor, Malaysia	2015	{"Ahmad, Wan Muhamad Amir Wan","Ismail, Ahmad","Jaafar, Ili Nabilah","Jalal, K. C. A.","John, Akbar B.","Kassim, Zaleha","Nordin, Nur Suhaila","Yunus, Kamaruzzaman"}	{"Non Seagrass"}
1978950	THALASSIA-TESTUDINUM PRODUCTIVITY AND GRAZING BY GREEN TURTLES IN A HIGHLY DISTURBED SEAGRASS BED	1988	{"WILLIAMS, SL"}	{"Non Zostera"}
1975976	A Comparison of Methods for Estimating the Productivity of Zostera marina	2010	{"Kim, Jae Woo","Kim, Seung Hyeon","Lee, Kun-Seop","Li, Wen-Tao","Park, Sang Rul"}	{"No Stressor/Restoration"}
1976140	Seasonal distribution and activity of nitrogen-cycling bacteria in Bardawil Lagoon, Egypt	2009	{"Bahgat, M.","Dewedar, A.","Shabana, E. E."}	{"Non Seagrass"}
1972805	Connected macroalgal-sediment systems: blue carbon and food webs in the deep coastal ocean	2019	{"Airs, Ruth","Atkinson, Angus","Beesley, Amanda","Carnovale, Giorgia","Cazenave, Pierre","Dashfield, Sarah","Hua, Er","Ingels, Jeroen","Jones, Mark","Krause-Jensen, Dorte","Lindeque, Penelope","McCoy, Sophie J.","McNeill, Caroline L.","Nunes, Joana","Parry, Helen","Pascoe, Christine","Queiros, Ana Moura","Ruehl, Saskia","Smyth, Tim","Somerfield, Paul J.","Stephens, Nicholas","Tait, Karen","Widdi…	{"Non Zostera"}
1978261	Phosphoryl group exchange between ATP and ADP catalyzed by H+-ATPase from oat roots	1997	{"Beauge, L","Helguera, G"}	{"Non Seagrass"}
1975345	ECOLOGY AND DISTRIBUTION OF THE ISOPOD GENUS IDOTEA IN THE BALTIC SEA: KEY SPECIES IN A CHANGING ENVIRONMENT	2012	{"Harding, Karin","Jonsson, Per R.","Leidenberger, Sonja"}	{"No Stressor/Restoration","Coastal Habitat"}
1974930	Asymmetric patterns of recovery in two habitat forming seagrass species following simulated overgrazing by urchins	2013	{"Burnell, Owen W.","Connell, Sean D.","Irving, Andrew D.","Russell, Bayden D."}	{"Non Zostera"}
1975511	Impacts of Cultivation of Kappaphycus alvarezii on Coral Reef Environs of the Gulf of Mannar and Palk Bay, South-eastern India	2012	{"BE Bhatt, JR","Bhatt, J. R.","Edward, J. K. Patterson","Kohli, RK","Singh, JS","Singh, SP","Tripathi, RS"}	{"Non Seagrass","Coastal Habitat"}
1976533	Interlinkage between Caribbean coral reefs and seagrass beds through feeding migrations by grunts (Haemulidae) depends on habitat accessibility	2008	{"Bothwell, J.","Nagelkerken, I.","Nemeth, R. S.","Pitt, J. M.","van der Velde, G."}	{"No Stressor/Restoration"}
1977328	Size-frequency patterns in morphometric characteristics of the seagrass Thalassia testudinum reflect environmental variability	2004	{"Durako, MJ","Hackney, JW"}	{"Non Zostera"}
1979171	STUDIES ON THE ABILITY OF A POTAMOGETON-PECTINATUS COMMUNITY TO REMOVE DISSOLVED NITROGEN AND PHOSPHORUS-COMPOUNDS FROM LAKE WATER	1981	{"HOWARDWILLIAMS, C"}	{"Non Seagrass"}
1975318	Megasporogenesis and embryogenesis in three sympatric Posidonia seagrass species	2012	{"Bunn, Eric","Dixon, Kingsley","Ma, Guohua","Zhang, Xinhua"}	{"Non Zostera"}
1973543	Winners and losers as mangrove, coral and seagrass ecosystems respond to sea-level rise in Solomon Islands	2017	{"Albert, Simon","Duke, Norman C.","Grinham, Alistair R.","Hoegh-Guldberg, Ove","Johnstone, Elizabeth","Kovacs, Eva","Leon, Javier X.","Mackenzie, Jock R.","Mumby, Peter J.","Phinn, Stuart R.","Roelfsema, Chris M.","Saunders, Megan I.","Woodroffe, Colin D."}	{"Non Zostera"}
1974193	Chinese cabbage special rejuvenation insect repellent compound fertilizer comprises seagrass powders, diatomite, biochemical potassium fulvate, seaweed, amino acid, functional fungus, shell oligosaccharide and nutrients	NA	{"LI G"}	{"Non Zostera","No Stressor/Restoration","No Restoration Mentioned"}
1973236	Human activities accelerated the degradation of saline seepweed red beaches by amplifying top-down and bottom-up forces	2018	{"Chen, Luzhen","Cong, Pifu","Du, Jinqiu","Hou, Wenhao","Lei, Wei","Li, Zhengjie","Liao, Guoxiang","Lu, Weizhi","Xiao, Jingfeng","Zhang, Jialin","Zhang, Yihui"}	{"Non Seagrass"}
1976241	Nocturnal fish movement and trophic flow across habitat boundaries in a coral reef ecosystem (SW Puerto Rico)	2009	{"Appeldoorn, Richard S.","Caldow, Chris","Christensen, John","Clark, Randall D.","Monaco, Mark E.","Pittman, Simon","Roque, Bryant"}	{"Non Seagrass"}
1973446	Influence of Coastal Submarine Groundwater Discharges on Seagrass Communities in a Subtropical Karstic Environment	2018	{"Arcega-Cabrera, F.","Herrera-Silveira, J. A.","Kantun-Manzano, C. A."}	{"Non Zostera"}
1978289	Ceratophyllum demersum hampers phytoplankton development in some small Norwegian lakes over a wide range of phosphorus concentrations and geographical latitude	1997	{"Faafeng, BA","Mjelde, M"}	{"Non Seagrass"}
1973887	Desiccation tolerance and underlying mechanisms for the recovery of the photosynthetic efficiency in the tropical intertidal seagrasses Halophila ovalis and Thalassia hemprichii	2016	{"Buapet, Pimchanok","Kongnual, Rapeepan","Wuthirak, Tharawit"}	{"Non Zostera"}
1974538	Uptake of nitrogen from compound pools by the seagrass Zostera noltii	2014	{"Bouma, Tjeerd J.","La Nafie, Yayu A.","Van Engeland, Tom","van Katwijk, Marieke M."}	{"No Stressor/Restoration"}
1974463	Mapping seagrass cost-effectively in the Coral Triangle: Sabah, Malaysia as a case study	2015	{"Marsh, Helene","Rajamani, Leela"}	{"Non Zostera"}
1977721	Dissolved organic carbon production and consumption in anoxic marine sediments: A pulsed-tracer experiment	2001	{"Alperin, MJ","Hee, CA","Martens, CS","Pease, TK"}	{"Non Seagrass"}
1974401	Lulwoana sp., a dark septate endophyte in roots of Posidonia oceanica (L.) Delile seagrass	2015	{"Burruano, S.","Calvo, S.","Colombo, P.","Di Maida, G.","Lo Piccolo, S.","Ottonello, D.","Perrone, R.","Piazza, G.","Pirrotta, M.","Tomasello, A.","Torta, L."}	{"Non Zostera"}
1977546	Changes in carbon and nitrogen cycling following Spartina alterniflora invasion of Pacific estuaries.	2003	{"Civille, Janie C.","Grosholz, Edwin D.","Lambrinos, John G.","Tyler, Anna C."}	{"Non Seagrass"}
1976900	Turkish freshwater and marine macrophyte extracts show in vitro antiprotozoal activity and inhibit FabI, a key enzyme of Plasmodium falciparum fatty acid biosynthesis	2006	{"Atici, T.","Brun, R.","Orhan, I.","Perozzo, R.","Sener, B.","Tasdemir, D."}	{"Non Zostera","No Restoration Mentioned"}
1973682	Optimization of dissolved urea measurements in coastal waters with the combination of a single reagent and high temperature	2017	{"Alam, Md. Shafiul","Casareto, Beatriz E.","Sultana, Rumana","Suzuki, Toshiyuki","Suzuki, Yoshimi"}	{"Non Seagrass"}
1978666	AGGREGATION DYNAMICS IN JUVENILE QUEEN CONCH (STROMBUS-GIGAS) - POPULATION-STRUCTURE, MORTALITY, GROWTH, AND MIGRATION	1993	{"RAY, M","STONER, AW"}	{"Non Seagrass"}
1973680	Spatial dietary shift in bivalves from embayment with river discharge and mariculture activities to outer seagrass beds in northwestern Philippines	2017	{"Diego-McGlone, Maria Lourdes San","Miyajima, Toshihiro","Morimoto, Naoko","Regino, Genevieve L.","Siringan, Fernando P.","Tanaka, Yoshiyuki","Umezawa, Yu","Watanabe, Atsushi"}	{"No Stressor/Restoration"}
1972667	Kelp-bed dynamics across scales: Enhancing mapping capability with remote sensing and GIS	2020	{"Gagnon, Patrick","St-Pierre, Anne P."}	{"Non Seagrass"}
1974335	Metabolic theory and taxonomic identity predict nutrient recycling in a diverse food web	2015	{"Allgeier, Jacob Edward","Layman, Craig A.","Rosemond, Amy D.","Schindler, Daniel E.","Wenger, Seth J."}	{"Non Zostera"}
1975372	Algal cover in mangroves affects distribution and predation rates by carnivorous fishes	2012	{"Jaxion-Harm, J.","Speight, M. R."}	{"Non Seagrass"}
1978108	The Mediterranean climate as a template for Mediterranean marine ecosystems: the example of the northeast Spanish littoral	1999	{"Agusti, S","Duarte, CM","Kennedy, H","Vaque, D"}	{"Non Seagrass"}
1975067	Bucktooth parrotfish Sparisoma radians grazing on Thalassia in Bermuda varies seasonally and with background nitrogen content	2013	{"Holzer, Kimberly K.","McGlathery, Karen J.","Seekell, David A."}	{"Non Zostera"}
1976339	Effects of large-scale anthropogenic development on juvenile lemon shark (Negaprion brevirostris) populations of Bimini, Bahamas	2008	{"Franks, Bryan R.","Gruber, Samuel H.","Jennings, David E.","Kessel, Steven T.","Robertson, Anne L."}	{"Non Seagrass"}
1977778	Effects of in situ experimental shading on the Mediterranean seagrass Posidonia oceanica	2001	{"Romero, Javier","Ruiz, Juan Manuel"}	{"Non Zostera"}
1976288	Identifying the land-based sources of suspended sediments, nutrients and pesticides discharged to the Great Barrier Reef from the Tully-Murray Basin, Queensland, Australia	2009	{"Bainbridge, Zoe T.","Brodie, Jon E.","Faithful, John W.","Lewis, Stephen E.","Sydes, Damon A."}	{"Non Seagrass"}
1977214	Eutrophication in the northeast shelf large marine ecosystem: Linking hydrodynamic and economic models for benefit estimation	2005	{"BE Hennessey, T","Diamantides, J","Grigalunas, TA","Opaluch, JJ","Sutinen, JG","Woo, DS"}	{"Non Seagrass"}
1973511	The Stenohaline Seagrass Posidonia oceanica Can Persist in Natural Environments Under Fluctuating Hypersaline Conditions	2017	{"Garcia-Munoz, Rocio","Marin-Guirao, Lazaro","Ruiz, Juan Manuel","Sandoval-Gil, Jose Miguel"}	{"Non Zostera"}
1978387	Seasonal and annual variation in abundance of postlarval and juvenile grooved tiger prawns Penaeus semisulcatus and environmental variation in the Embley River, Australia: A six year study	1996	{"Haywood, MDE","Heales, DS","Staples, DJ","Vance, DJ"}	{"Non Seagrass"}
1976651	NLOAD: An interactive, web-based modeling tool for nitrogen management in estuaries	2007	{"Bowen, Jennifer L.","Mazzilli, S.","Ramstack, Joy M.","Valielai, Ivan"}	{"Non Seagrass"}
1976220	Density, size structure, shell orientation and epibiontic colonization of the fan mussel Pinna nobilis L. 1758 (Mollusca: Bivalvia) in three contrasting habitats in an estuarine area of Sardinia (W Mediterranean)	2009	{"Addis, Piero","Brundu, Gianni","Cau, Angelo","Corrias, Stefano","Manunza, Andrea","Secci, Marco"}	{"Non Zostera"}
1978832	A SEASONAL STUDY OF THE SEAGRASS RUPPIA-MARITIMA L IN TAMPA BAY, FLORIDA - ORGANIC CONSTITUTENTS AND TOLERANCES TO SALINITY AND TEMPERATURE	1991	{"DAWES, CJ","LAZAR, AC"}	{"Non Zostera"}
1973951	Impact of current speed on mass flux to a model flexible seagrass blade	2016	{"Lei, Jiarui","Nepf, Heidi"}	{"No Stressor/Restoration"}
1973050	Stabilizing effects of seagrass meadows on coastal water benthic food webs	2019	{"Jankowska, Emilia","Lepoint, Gilles","Michel, Loic N.","Wlodarska-Kowalczuk, Maria"}	{"No Stressor/Restoration"}
1975989	Seasonal dynamics of macrophytes and phytoplankton in shallow lakes: a eutrophication-driven pathway from plants to plankton?	2010	{"Davidson, Thomas A.","Jones, John Iwan","Sayer, Carl D."}	{"Non Seagrass"}
1974262	Seahorse (Hippocampinae) population fluctuations in the Ria Formosa Lagoon, south Portugal	2015	{"Andrade, J. P.","Caldwell, I. R.","Correia, M.","Koldewey, H. J.","Palma, J."}	{"Non Seagrass"}
1974214	Optimizing Posidonia oceanica (L.) Delile shoot density: Lessons learned from a shallow meadow	2015	{"Bacci, Tiziano","Cappa, Piero","Rende, Sante Francesco","Rocca, Domenico","Scalise, Simone","Scardi, Michele"}	{"Non Zostera"}
1977740	The importance of mineralization based on sulfate reduction for nutrient regeneration in tropical seagrass sediments	2001	{"Andersen, FO","Boschker, HTS","Holmer, M","Nielsen, SL"}	{"Non Zostera"}
1974852	Carbon and nutrient fluxes across tropical river-coastal boundaries	2014	{"Allison, MA","Alongi, D. M.","BE Bianchi, TS","Bouillon, S.","Cai, WJ","Duarte, C.","Ramanathan, A.","Robertson, A. I."}	{"No Stressor/Restoration"}
1977304	Effects of age, body size and season on food consumption and digestion of captive dugongs (Dugong dugon)	2004	{"Asano, S","Furuta, M","Goto, M","Ito, C","Kataoka, T","Oka, Y","Wakai, Y","Wakamura, K","Yahaya, MS"}	{"Non Seagrass"}
1977755	Detrital stocks and dynamics of the seagrass Posidonia oceanica (L.) Delile in the Spanish Mediterranean	2001	{"Cebrian, J","Duarte, CM"}	{"Non Zostera"}
1975026	Acclimation to different depths by the marine angiosperm Posidonia oceanica: transcriptomic and proteomic profiles	2013	{"Bayer, Philipp E.","Bernardo, Letizia","Cavallini, Andrea","Dattolo, Emanuela","Gu, Jenny","Mazzuca, Silvia","Natali, Lucia","Procaccini, Gabriele","Serra, Ilia A.","Spadafora, Antonia"}	{"Non Zostera"}
1974203	Feasibility study of faecal sludge treatment by constructed wetlands in Sahelian context: Experiments with Oryza longistaminata and Sporobolus pyramidalis species in Ouagadougou	2015	{"Beck, Christian","Kouawa, Tadjouwa","Maiga, Amadou Hama","Mose, Robert","Wanko, Adrien"}	{"Non Seagrass"}
1975911	Optical properties of canopies of the tropical seagrass Thalassia testudinum estimated by a three-dimensional radiative transfer model	2010	{"Enriquez, S.","Hedley, J."}	{"Non Zostera"}
1975261	A Middle Miocene carbonate platform under silici-volcaniclastic sedimentation stress (Leitha Limestone, Styrian Basin, Austria) - Depositional environments, sedimentary evolution and palaeoecology	2012	{"Erhart, Christoph","Piller, Werner E.","Reuter, Markus"}	{"Non Seagrass"}
1974975	Biomass Transfer Subsidizes Nitrogen to Offshore Food Webs	2013	{"Chanton, Jeffery","Landing, William M.","Nelson, James A.","Stallings, Christopher D."}	{"Non Zostera"}
1972898	Ecosystem management tools to study natural habitats as wave damping structures and coastal protection mechanisms	2019	{"Osorio, A. F.","Osorio-Cano, J. D.","Pelaez-Zapata, D. S."}	{"Non Seagrass","Coastal Habitat"}
1977894	Demographic characteristics of Lytechinus variegatus (Echinoidea : Echinodermata) from three habitats in a North Florida Bay, Gulf of Mexico	2000	{"Beddingfield, SD","McClintock, JB"}	{"Non Seagrass"}
1977622	Temporal and spatial dynamics of spawning, settlement, and growth of gray snapper (Lutjanus griseus) from the West Florida shelf as determined from otolith microstructures	2002	{"Allman, RJ","Grimes, CB"}	{"Non Seagrass"}
1979289	LABORATORY TRIALS OF A NEW TRIAZINE HERBICIDE (DPX3674) ON VARIOUS AQUATIC SPECIES OF MACROPHYTES AND ALGAE	1977	{"FOWLER, MC"}	{"Non Zostera","No Restoration Mentioned"}
1976764	Biomass of Ruppia cirrhosa and Potamogeton pectinatus in a Mediterranean brackish lagoon, Lake Ichkeul, Tunisia	2007	{"Boudouresque, Charles Francois","Casagranda, Caterina"}	{"Non Zostera"}
1973497	Benthic Habitat Mapping Using Multispectral High-Resolution Imagery: Evaluation of Shallow Water Atmospheric Correction Techniques	2017	{"Eugenio, Francisco","Marcello, Javier","Martin, Javier","Rodriguez-Esparragon, Dionisio"}	{"Non Seagrass"}
1978673	THE EFFECTS OF COMPLEX TROPHIC INTERACTIONS ON A MARINE MICROBENTHIC COMMUNITY	1993	{"MORIARTY, DJW","WALTERS, K"}	{"Non Seagrass"}
1976362	Surficial sediments on the continental shelf of Tasmania, Australia	2008	{"Bone, Yvonne","James, Noel P.","Malcolm, Isabelle","Marshall, J.","Martindale, Rowan C."}	{"Non Zostera","No Restoration Mentioned"}
1972703	Evaluation of Posidonia oceanica waste as a biomass source for energy generation	2019	{"Grubor, Mateja","Kricka, Tajana","Peter, Anamarija","Voca, Neven"}	{"Non Zostera"}
1978649	SEDIMENT-NUTRIENT INTERACTIONS IN TROPICAL SEAGRASS BEDS - A COMPARISON BETWEEN A TERRIGENOUS AND A CARBONATE SEDIMENTARY ENVIRONMENT IN SOUTH SULAWESI (INDONESIA)	1993	{"ERFTEMEIJER, PLA","MIDDELBURG, JJ"}	{"Non Zostera"}
1977313	Phytoplankton dynamics in Pomquet Harbour, Nova Scotia: a lagoon in the southern Gulf of St Lawrence	2004	{"Garbary, DJ","Kim, KY","McLachlan, JL"}	{"Non Seagrass"}
1973813	More Than Just a Spawning Location: Examining Fine Scale Space Use of Two Estuarine Fish Species at a Spawning Aggregation Site	2017	{"Bickford, Joel","Boucek, Ross E.","Leone, Erin","Lowerre-Barbieri, Susan","Walters-Burnsed, Sarah"}	{"Non Seagrass"}
1974671	Getting turfed: The population and habitat impacts of Lophocladia lallemandii invasions on endemic Posidonia oceanica meadows	2014	{"Alcoverro, Teresa","Arthur, Rohan","Marba, Nuria"}	{"Non Zostera"}
1977523	Stable carbon isotope evidence for coupling between sedimentary bacteria and seagrasses in a sub-tropical lagoon	2003	{"Cifuentes, LA","Jones, WB","Kaldy, JE"}	{"Non Zostera"}
1978336	The effects of floating mats of Azolla filiculoides Lam and Lemna minuta Kunth on the growth of submerged macrophytes	1996	{"Eaton, JW","Hardwick, K","Janes, RA"}	{"Non Seagrass"}
1978951	SEASONAL-CHANGES IN NITROGEN, FREE AMINO-ACIDS, AND C/N RATIO IN MEDITERRANEAN SEAGRASSES	1988	{"PIRC, H","WOLLENWEBER, B"}	{"Non Zostera"}
1974430	Responses of chlorophyll and MDA of Vallisneria natans to nitrogen and phosphorus availability and epiphytic algae	2015	{"Kong, Fan-Fan","Qin, Bo-Qiang","Song, Yu-Zhi","Xue, Yan"}	{"Non Seagrass"}
1979303	CONTROL OF WATER WEEDS BY GRASS CARP IN A DRAINAGE DITCH IN NEW-ZEALAND	1975	{"EDWARDS D J","MOORE E"}	{"Non Seagrass"}
1977918	'Co-consumption' and 'protective coating': two new proposed effects of epiphytes on their macroalgal hosts in mesograzer-epiphyte-host interactions	2000	{"Engelbert, S","Karez, R","Sommer, U"}	{"Non Seagrass"}
1975903	Exposure to water increased pollen longevity of pondweed (Potamogeton spp.) indicates different mechanisms ensuring pollination success of angiosperms in aquatic habitat	2010	{"Gituru, Robert W.","Guo, You-hao","Yang, Chun-feng","Zhang, Xiao-lin"}	{"Non Seagrass"}
1978928	DENSITY-DEPENDENT GROWTH AND GRAZING EFFECTS OF JUVENILE QUEEN CONCH STROMBUS-GIGAS L IN A TROPICAL SEAGRASS MEADOW	1989	{"STONER, AW"}	{"Non Seagrass"}
1976583	Biodiversity mediates productivity through different mechanisms at adjacent trophic levels	2007	{"Bruno, John F.","Duffy, J. Emmett","Long, Zachary T."}	{"Non Seagrass"}
1976760	Seagrass as pasture for seacows: Landscape-level dugong habitat evaluation	2007	{"Lawler, Ivan R.","Marsh, Helene","Sheppard, James K."}	{"Non Zostera"}
1977172	Interactions between benthic macroalgal and microalgal mats	2005	{"BE Kristensen, E","Haese, RR","Kostka, JE","McGlathery, K","Sundback, K"}	{"Non Seagrass"}
1978935	A LONG-TERM STUDY ON THE BEHAVIOR AND SURVIVAL OF EARLY JUVENILE AMERICAN LOBSTER, HOMARUS-AMERICANUS, IN 3 NATURALISTIC SUBSTRATES - EELGRASS, MUD, AND ROCKS	1988	{"BARSHAW, DE","BRYANTRICH, DR"}	{"No Stressor/Restoration"}
1975356	Coral reef ecosystems protect shore from high-energy waves under climate change scenarios	2012	{"Alino, Porfirio","Atrigenio, Michael","Cabrera, Olivia","David, Laura","Siringan, Fernando","Villaluz, Maya","Villanoy, Cesar"}	{"Non Seagrass","Coastal Habitat"}
1972766	Stoichiometric Traits Vary Widely Within Species: A Meta-Analysis of Common Garden Experiments	2019	{"Butler, Orpheus M.","Koffel, Thomas","Lemmen, Kimberley D.","Rudman, Seth M.","Symons, Celia C."}	{"Non Seagrass"}
1975405	Hydrodynamic constraints to the seaward development of Posidonia oceanica meadows	2012	{"Bianchi, Carlo N.","Ferrari, Marco","Montefalcone, Monica","Morri, Carla","Vacchi, Matteo"}	{"Non Zostera"}
1976216	Faunal composition within algal mats and adjacent habitats on Likuri Island, Fiji Islands	2009	{"Alfaro, Andrea C.","Nainoca, Winifereti","Zemke-White, W. Lindsey"}	{"Non Zostera"}
1976313	Evaluation of the health status of a coastal ecosystem in southeast Mexico: Assessment of water quality, phytoplankton and submerged aquatic vegetation	2009	{"Herrera-Silveira, Jorge A.","Morales-Ojeda, Sara M."}	{"Non Zostera"}
1978415	Nutrient effects on the health of the bay	1996	{"Boynton, W. R."}	{"Non Seagrass"}
1974502	Modeling ecosystem processes with variable freshwater inflow to the Caloosahatchee River Estuary, southwest Florida. I. Model development	2014	{"Buzzelli, Christopher","Doering, Peter H.","Fugate, David","Sun, Detong","Wan, Yongshan"}	{"Non Zostera","No Restoration Mentioned"}
1977958	Establishing light requirements for the seagrass Thalassia testudinum: An example from Tampa Bay, Florida	2000	{"BE Bortone, SA","Dixon, LK"}	{"Non Zostera"}
1979028	GROWTH AND MOVEMENT OF ARTIFICIALLY REARED YOUNG ROCKFISH SEBASTES-SCHLEGELI AFTER RELEASE IN MATSUSHIMA BAY JAPAN	1985	{"KISO K","NAGASHIMA H","SAKAI K"}	{"No Stressor/Restoration"}
1972812	Different strategies of nitrogen acquisition in two tropical seagrasses under nitrogen enrichment	2019	{"Mtolera, Matern","Saavedra-Hortua, Daniel Arturo","Teichberg, Mirta","Viana, Ines G."}	{"Non Zostera"}
1977026	Benthic cyanobacterial bloom impacts the reefs of South Florida (Broward County, USA)	2005	{"Banks, K","Golubic, S","Paul, VJ","Thacker, RW"}	{"Non Seagrass"}
1973172	Experimental evidence of warming-induced flowering in the Mediterranean seagrass Posidonia oceanica	2018	{"Alcoverro, T.","Arthur, R.","Bernardeau-Esteller, J.","Garcia-Munoz, R.","Marin-Guirao, L.","Ontoria, Y.","Perez, M.","Procaccini, G.","Ramos-Segura, A.","Romero, J.","Ruiz, J. M.","Sanmarti, N."}	{"Non Zostera"}
1976161	Comparison of recent vegetation and diaspore banks along abiotic gradients in brackish coastal lagoons	2009	{"Selig, Uwe","Steinhardt, Tim"}	{"Non Seagrass"}
1979256	DRIFT ALGAE COMMUNITY OF SEAGRASS BEDS IN REDFISH BAY, TEXAS	1978	{"COWPER, SW"}	{"No Stressor/Restoration"}
1977100	Seasonal and spatial variation in the organic carbon and nitrogen concentration and their stable isotopic composition in Zostera marina (Denmark)	2005	{"Borum, J","Kennedy, DP","Kennedy, H","Papadimitriou, S"}	{"No Stressor/Restoration"}
1976969	Early life history of Syngnathus abaster	2006	{"Almada, VC","Monteiro, NM","Silva, K","Vieira, MN"}	{"Non Zostera"}
1978239	Annual cycle and interannual variability of ecosystem metabolism in a temperate climate embayment	1997	{"Hollibaugh, JT","Smith, SV"}	{"Non Seagrass"}
1978544	FISH AND SEA-URCHIN HERBIVORY AND COMPETITION IN KENYAN CORAL-REEF LAGOONS - THE ROLE OF REEF MANAGEMENT	1994	{"MCCLANAHAN, TR","MWACHIREYA, S","NUGUES, M"}	{"No Stressor/Restoration","Coastal Habitat"}
1973433	The Growth and Mortality Rate of Mullet (Mugil dussumieri) on Seagrass Beds of The Teluk Awur Bay, Jepara	2018	{Ambariyanto,"BE Riyadi, MA","Barbosa, M","Faraz, SMH","Gasem, H","Hagerman, R","Hidaka, M","Igarashi, Y","Irwani, I.",Jamari,"Jaswir, I","Pals, G","Pinandita, L. K.","Rajasa, OK","Ravishankar, CN","Riniatsih, I.","Sabdono, A","Starger, C","Sudoyo, H","Susanto, H","Tassone, F","Tsuchiya, M","Wijayanti, DP","Winarni, TI","Zainuri, M"}	{"Non Zostera"}
1976726	Long-term patterns of shifts between clear and turbid states in Lake Krankesjon and Lake Takern	2007	{"Andersson, Gunnar","Blindow, Irmgard","Hargeby, Anders"}	{"Non Zostera"}
1975153	Untitled	2013	{"Ebbinge, Bart","Rees, Eileen","Schricke, Vincent"}	{"Non Seagrass"}
1974371	Extreme temperatures, foundation species, and abrupt ecosystem change: an example from an iconic seagrass ecosystem	2015	{"Burkholder, Derek A.","Fourqurean, James W.","Fraser, Matthew W.","Heithaus, Michael R.","Kendrick, Gary A.","Statton, John","Thomson, Jordan A."}	{"Non Zostera"}
1976574	Conceptual model of seagrass die-off in Florida Bay: Links to biogeochemical processes	2007	{"Koch, M. S.","Kyhn-Hansen, C.","Madden, C. J.","Nielsen, O. I.","Schopmeyer, S. A."}	{"Non Zostera"}
1974255	Sulfated phenolic acids from Dasycladales siphonous green algae	2015	{"Kurth, Caroline","Pohnert, Georg","Welling, Matthew"}	{"No Stressor/Restoration"}
1973111	Molluscan benthic communities at Brijuni Islands (northern Adriatic Sea) shaped by Holocene sea-level rise and recent human eutrophication and pollution	2018	{"Gallmetzer, Ivo","Haselmair, Alexandra","Mautner, Anna-Katharina","Schnedl, Sara-Maria","Tomasovych, Adam","Zuschin, Martin"}	{"Non Seagrass"}
1978622	DECOMPOSITION OF MACROALGAE, VASCULAR PLANTS AND SEDIMENT DETRITUS IN SEAWATER - USE OF STEPWISE THERMOGRAVIMETRY	1994	{"KRISTENSEN, E"}	{"Non Zostera"}
1977857	Estuaries of the south Atlantic coast of North America: Their geographical signatures	2000	{"Alber, M","Allen, D","Chalmers, A","Dame, R","Gardner, R","Gilman, C","Kjerfve, B","Lewitus, A","Mallin, M","Montague, C","Pinckney, J","Smith, N"}	{"Non Seagrass","Coastal Habitat"}
1975272	Habitat Affects Survival of Translocated Bay Scallops, Argopecten irradians concentricus (Say 1822), in Lower Chesapeake Bay	2012	{"Bovery, Caitlin M.","Cordero, Ana L. Hernandez","Lipcius, Romuald N.","Schulte, David M.","Seitz, Rochelle D."}	{"No Stressor/Restoration","Coastal Habitat"}
1977645	Model of alternative predominance of phytoplankton-periphyton-macrophytes in lentic waters of Mediterranean coastal wetlands	2002	{"Moreno-Amich, R","Quintana, XD","Trobajo, R"}	{"Non Zostera"}
1972759	A Genome-Wide Approach to the Phylogeography of the Mussel Mytilus galloprovincialis in the Adriatic and the Black Seas	2019	{"Bat, Levent","Ben Souissi, Jamila","Boscari, Elisa","Chassanite, Aurore","Congiu, Leonardo","Guarnieri, Giuseppe","Kruschel, Claudia","Macic, Vesna","Marino, Ilaria Anna Maria","Micu, Dragos","Milchakova, Nataliya","Panayotova, Marina","Papetti, Chiara","Paterno, Marta","Planes, Serge","Strungaru, Stefan","Todorova, Valentina Ruseva","Voutsinas, Emanuela","Zane, Lorenzo"}	{"Non Seagrass"}
1974274	Towards a framework for assessment and management of cumulative human impacts on marine food webs	2015	{"Abadie, Arnaud","Boudouresque, Charles-Francois","Coll, Marta","Gambi, Maria-Cristina","Giakoumi, Sylvaine","Gobert, Sylvie","Guidetti, Paolo","Halpern, Benjamin S.","Katsanevakis, Stelios","Lejeune, Pierre","Michel, Loic N.","Micheli, Fiorenza","Montefalcone, Monica","Pergent, Gerard","Pergent-Martini, Christine","Possingham, Hugh P.","Sanchez-Jerez, Pablo","Sini, Maria","Velimirov, Branko","V…	{"Non Zostera"}
1978784	FATE AND BIOLOGICAL EFFECTS OF CONTAMINATED VEGETATION IN A TENNESSEE STREAM	1992	{"HAYNES, GJ","MARTINEZ, MI","STEWART, AJ"}	{"Non Seagrass"}
1977673	Groundwater effects on diversity and abundance of lagoonal seagrasses in Kenya and on Zanzibar Island (East Africa)	2002	{"Hamminga, MA","Kamermans, P","Marba, N","Mateo, MA","Mtolera, M","Stapel, J","Tack, JF","Van Daele, T","Verheyden, A"}	{"Non Zostera","No Restoration Mentioned"}
1978185	The role of macrobenthic communities for sediment-water material exchange in the Sylt-Romo tidal basin	1998	{"Asmus, Harald","Asmus, Ragnhild"}	{"No Stressor/Restoration"}
1974780	Effects of seabird nitrogen input on biomass and carbon accumulation after 50 years of primary succession on a young volcanic island, Surtsey	2014	{"Janssens, I. A.","Leblans, N. I. W.","Magnusson, B.","Roefs, P.","Sigurdsson, B. D.","Thuys, R."}	{"Non Seagrass"}
1979318	LIFE CYCLES OF MARINE NEMATODES - INFLUENCE OF TEMPERATURE AND SALINITY ON DEVELOPMENT OF MONHYSTERA-DENTICULATA TIMM	1972	{"LEE, JJ","TIETJEN, JH"}	{"Non Seagrass"}
1975278	Photosynthetic response of Vallisneria natans (Lour.) Hara (Hydrocharitaceae) to increasing nutrient loadings	2012	{"Cai, X. L.","Chen, D.","Dai, J. Y.","Gao, G.","Tang, X. M."}	{"Non Seagrass"}
1979172	TRENDS IN SUBMERSED MACROPHYTE COMMUNITIES OF THE CURRITUCK SOUND - 1977-1979	1981	{"CAREY, DF","DAVIS, GJ"}	{"Non Seagrass"}
1977156	Major role of marine vegetation on the oceanic carbon cycle	2005	{"Caraco, N","Duarte, CM","Middelburg, JJ"}	{"No Stressor/Restoration"}
1978072	Photosynthetic tolerances to desiccation of tropical intertidal seagrasses	1999	{"Beer, S","Bjork, M","Uku, J","Weil, A"}	{"No Restoration Mentioned"}
1979176	THE ASSOCIATION OF N2-FIXING BACTERIA WITH SEA-URCHINS	1981	{"GUERINOT, ML","PATRIQUIN, DG"}	{"Non Seagrass"}
1976277	Bio-energetic model of Manila clam Ruditapes philippinarum biomass changes couples with physical-ecological model in Akkeshi estuary (Hokkaido, northeast Japan).	2009	{"Kishi, M.J.","Kishivai, M.","Krasnenko, A.S.","Nikonov, Yu. Y."}	{"No Stressor/Restoration","No Restoration Mentioned"}
1975527	Diurnal variation in relative photosynthetic performance of marestail (Hippuris vulgaris Linn.) Across a water temperature gradient using PAM fluorometry in Jiuzhaigou National Nature Reserve, Sichuan Province, China	2011	{"Bossard, Carla","Gao Linan","Han Zhiguo","Tang Ya","Wang Yan"}	{"Non Seagrass"}
1976101	Analysis of the trophic role of Mediterranean seagrasses in marine coastal ecosystems: a review	2009	{"Vizzini, Salvatrice"}	{"Non Zostera"}
1973936	Meiofauna communities, nematode diversity and C degradation rates in seagrass (Posidonia oceanica L.) and unvegetated sediments invaded by the algae Caulerpa cylindracea (Sonder)	2016	{"Danovaro, Roberto","Fraschetti, Simona","Pusceddu, Antonio","Rizzo, Lucia","Scopa, Mariaspina"}	{"Non Zostera"}
1972751	Above-below surface interactions mediate effects of seagrass disturbance on meiobenthic diversity, nematode and polychaete trophic structure	2019	{"Bik, Holly M.","Bjork, Mats","Creer, Simon","Dahl, Martin","Deyanoya, Diana","Gullstrom, Martin","Lyimo, Liberatus D.","Nascimento, Francisco J. A.","Pereira, Tiago Jose","Schuelke, Taruna"}	{"No Stressor/Restoration"}
1974931	Recurring nocturnal benthic emergence along the coral reef-seagrass interface in the Florida Keys National Marine Sanctuary: Evidence of a possible novel prey escape response	2013	{"Blackmon, Derrick C.","Valentine, John F."}	{"Non Zostera"}
1976149	ENHANCING THE POTENTIAL FOR POPULATION RECOVERY: RESTORATION OPTIONS FOR BAY SCALLOP POPULATIONS, ARGOPECTEN IRRADIANS CONCENTRICUS, IN NORTH CAROLINA	2009	{"Fegley, Stephen R.","Gaskill, David W.","Geraldi, Nathan R.","Peterson, Charles H."}	{"Non Zostera"}
1978092	Dynamics and stability of Chara sp and Potamogeton pectinatus in a shallow lake changing in eutrophication level	1999	{"Coops, H","Scheffer, M","Van Nes, E","Van den Berg, MS"}	{"Non Seagrass"}
1973990	Distribution and Localised Effects of the Invasive Ascidian Didemnum perlucidum (Monniot 1983) in an Urban Estuary	2016	{"McDonald, Justin I.","Simpson, Tiffany Schenk","Wernberg, Thomas"}	{"Non Zostera","No Restoration Mentioned"}
1974408	A Miniature Bioassay for Testing the Acute Phytotoxicity of Photosystem II Herbicides on Seagrass	2015	{"Collier, Catherine J.","Flores, Florita","Mercurio, Phil","Negri, Andrew P.","O'Brien, Jake","Ralph, Peter J.","Wilkinson, Adam D."}	{"Non Zostera"}
1972526	Capturing a Mode of Intermediate Water Formation in the Red Sea	2020	{"Asfahani, Khaled","Hoteit, Ibrahim","Jones, Burton H.","Kheireddine, Malika","Krokos, George","Papadopoulos, Vassilis P.","Sofianos, Sarantis"}	{"Non Seagrass"}
1973180	Below-ground processes control the success of an invasive seaweed	2018	{"Bianchelli, Silvia","Bonechi, Lisa","Bulleri, Fabio","Buschi, Emanuela","Gribben, Paul E.","Nielsen, Shaun","Pusceddu, Antonio","Ravaglioli, Chiara","Thomas, Torsten"}	{"Non Zostera"}
1978428	Production and carbon reserve dynamics of the seagrass Thalassia testudinum in Corpus Christi Bay, Texas, USA	1996	{"Dunton, Kenneth H.","Lee, Kun-Seop"}	{"Non Zostera"}
1973914	Effects of Copper Exposure on Photosynthesis and Growth of the Seagrass Cymodocea nodosa: An Experimental Assessment	2016	{"Cervantes, Daniel","Llagostera, Izaskun","Perez, Marta","Romero, Javier","Sanmarti, Neus"}	{"Non Zostera"}
1976127	Decoupling of nutrient and grazer impacts on a benthic estuarine diatom assemblage	2009	{"Armitage, Anna R.","Fong, Peggy","Gonzalez, Vanessa L."}	{"Non Seagrass"}
1973890	The importance of recurrent reproductive events for Ruppia maritima seed bank viability in a highly variable estuary	2016	{"Frankovich, Thomas A.","Koch, Marguerite S.","Madden, Christopher J.","Strazisar, Theresa"}	{"Non Zostera"}
1972901	Biogeographical scenarios modulate seagrass resistance to small-scale perturbations	2019	{"Antich, Adria","Castejon, Ines","Csenteri, Ina","Curbelo, Leticia","Espino, Fernando","Fernandez-Torquemada, Yolanda","Manent, Pablo","Procaccini, Gabriele","Royo, Laura","Terrados, Jorge","Tomas, Fiona","Tuya, Fernando","Zarcero, Jestis","de la Ossa, Jose A.","del Pilar-Ruso, Yoana"}	{"Non Zostera","No Restoration Mentioned"}
1978342	Functional differences in epiphytic microbial communities in nutrient-rich freshwater ecosystems: An assay of denitrifying capacity	1996	{"Eriksson, PG","Weisner, SEB"}	{"Non Seagrass"}
1977297	CHEMISTRY, MINERALOGY AND RADIOACTIVITY IN POSIDONIA OCEANICA MEADOWS FROM NORTH-WESTERN SICILY	2004	{"Bartolotta, A.","Basile, S.","Bellia, S.","Brai, M.","Hauser, S.","Rizzo, S.","Tranchina, L."}	{"Non Zostera"}
1974159	Coastal nitrogen plumes and their relationship with seagrass distribution	2015	{"Benger, Simon","Bryars, Simon","Fernandes, Milena B.","Gaylard, Sam","Stuart-Williams, Hilary"}	{"Non Zostera"}
1976891	Primary production dynamics in a pristine groundwater influenced coastal lagoon of the Yucatan Peninsula	2006	{"Herrera-Silveira, Jorge A.","Medina-Gomez, Israel"}	{"No Stressor/Restoration"}
1979325	STUDIES IN ECOLOGY OF BALTIC SEA SHORE MEADOWS .4. DISTRIBUTION AND TURNOVER OF ORGANIC MATTER AND MINERALS IN A SHORE MEADOW ECOSYSTEM	1971	{"TYLER, G"}	{"Non Zostera"}
1975870	Origin of thickening in monocotyledon stems, slope variation and population structure in a riparian forest, and the influence of seagrass beds in fish community structure	2010	{"Kellner, Alexander W. A."}	{"Non Seagrass"}
1979006	SEAGRASS GROWTH AND SURVIVORSHIP UNDER THE INFLUENCE OF EPIPHYTE GRAZERS	1986	{"HOWARD, RK","SHORT, FT"}	{"Non Zostera"}
1976044	Sediment and water nutrients and microalgae in a coastal shallow lagoon, Ria Formosa (Portugal): Implications for the Water Framework Directive	2010	{"Brito, Ana","Fernandes, Teresa F.","Newton, Alice","Tett, Paul"}	{"Non Seagrass"}
1973009	Activity budgets, daily energy expenditure and energetic model of Black Brant Branta bernicla nigricans during winter and spring along the Lower Alaska Peninsula	2019	{"Black, Jeffrey M.","Daniels, Bryan L.","Ward, David H."}	{"No Stressor/Restoration"}
1978004	Diel cycles in calcite production and dissolution in a eutrophic basin	1999	{"Cicerone, DS","Roh, Y","Stewart, AJ"}	{"Non Seagrass"}
1978683	PERIPHYTON DENSITY AND SHADING IN RELATION TO TIDAL DEPTH AND FIDDLER-CRAB ACTIVITY IN INTERTIDAL SEAGRASS BEDS OF THE BANC-DARGUIN (MAURITANIA)	1993	{"BEIJER, JAJ","HOOTSMANS, MJM","VERMAAT, JE"}	{"No Stressor/Restoration"}
1974231	Seagrass (Zostera marina) Colonization Promotes the Accumulation of Diazotrophic Bacteria and Alters the Relative Abundances of Specific Bacterial Lineages Involved in Benthic Carbon and Sulfur Cycling	2015	{"Gong, Jun","Liu, Fanghua","Sun, Feifei","Zhang, Jianping","Zhang, Qianqian","Zhang, Xiaoli"}	{"No Stressor/Restoration"}
1976402	Analysis of annual fluctuations of C. nodosa in the Venice lagoon: Modeling approach	2008	{"Pavoni, Bruno","Sfriso, Adriano","Voinov, Alexey","Zharova, Nadezhda"}	{"Non Zostera"}
1978723	DISTRIBUTION OF SEAGRASSES AND ASSOCIATED MACROALGAE IN SOUTH SULAWESI, INDONESIA	1993	{"ERFTEMEIJER, PLA","VERHEIJ, E"}	{"Non Zostera"}
1977928	An experimental test of the occurrence of competitive interactions among SE Asian seagrasses	2000	{"Agawin, NSR","Duarte, CM","Fortes, MD","Terrados, J"}	{"Non Zostera"}
1979044	TEMPORAL AND SPATIAL VARIATION IN BACTERIAL PRODUCTION IN THE WATER COLUMN OVER A CORAL-REEF	1985	{"HUNT, WG","MORIARTY, DJW","POLLARD, PC"}	{"Non Seagrass","Coastal Habitat"}
1978681	PATTERNS IN METAL CONTENT OF SUBMERGED AQUATIC MACROPHYTES - THE ROLE OF PLANT-GROWTH FORM	1993	{"JACKSON, LJ","KALFF, J"}	{"Non Zostera","No Stressor/Restoration","No Restoration Mentioned","Coastal Habitat"}
1972765	Prevention is better than cure: Persian Gulf biodiversity vulnerability to the impacts of desalination plants	2019	{"Bahmanbeigloo, Zahra Afshari","Keshavarzifard, Mehrzad","Sharifinia, Moslem","Smith, Walker O.","Yap, Chee Kong"}	{"Non Zostera"}
2100056	Responses of physiological groups of tropical heterotrophic bacteria to temperature and dissolved organic matter additions: food matters more than warming	2020	{"Baltar, Federico","Carreira, Catia","Lonborg, Christian","Moran, Xose Anxelu G."}	{"Non Seagrass"}
1974948	Factors driving the seasonal distribution of planktonic and epiphytic ciliates in a eutrophicated Mediterranean Lagoon	2013	{"Akrout, Fourat","Aleya, Lotfi","Ben Brahim, Mounir","Dhib, Amel","Turki, Souad","Ziadi, Boutheina"}	{"Non Seagrass"}
1978806	EXPERIMENTAL-ANALYSIS OF HABITAT QUALITY FOR JUVENILE QUEEN CONCH IN SEAGRASS MEADOWS	1991	{"SANDT, VJ","STONER, AW"}	{"Non Seagrass"}
1974707	Similarity between contemporary vegetation and plant remains in the surface sediment in Mediterranean lakes	2014	{"Beklioglu, Meryem","Bucak, Tuba","Cakiroglu, Ayse I.","Davidson, Thomas A.","Jeppesen, Erik","Levi, Eti E.","Odgaard, Bent V."}	{"Non Seagrass"}
1973193	Aggregation patterns of two corallivorous snails and consequences for coral dynamics	2018	{"Hamman, Elizabeth A."}	{"Non Seagrass"}
1972760	Importance of benthic macrofauna and coastal biotopes for ecosystem functioning - Oxygen and nutrient fluxes in the coastal zone	2019	{"Burska, Dorota","Janas, Urszula","Kendzierska, Halina","Lukawska-Matuszewska, Katarzyna","Pryputniewicz-Flis, Dorota"}	{"No Stressor/Restoration"}
1977438	Feeding preferences, seasonal gut repletion indices, and diel feeding patterns of the sea urchin Tripneustes gratilla (Echinodermata : Echinoidea) on a coastal habitat off Toliara (Madagascar)	2003	{"Jangoux, M","Rasolofonirina, R","Vaitilingon, D"}	{"Non Seagrass","Coastal Habitat"}
1974977	Bioindicators in marine waters: Benthic diatoms as a tool to assess water quality from eutrophic to oligotrophic coastal ecosystems	2013	{"Desrosiers, Catherine","Eulin, Anne","Leflaive, Josephine","Ten-Hage, Loick"}	{"Non Seagrass"}
2100249	The contributions of allochthonous and autochthonous materials to organic carbon in coastal sediment: A case study from Tangkhen Bay, Phuket, Thailand	2019	{"Hayashizaki, Kenichi","Ogawa, Hisao","Panyawai, Janmanee","Prathep, Anchana","Stankovic, Milica","Tamada, Satoru","Tuntiprapas, Piyalap"}	{"Non Seagrass"}
1977767	Algal propagule banks modify competition, consumer and resource control on Baltic rocky shores	2001	{"Lotze, HK","Sommer, U","Worm, B"}	{"Non Seagrass","Coastal Habitat"}
1978675	PATTERNS IN DECOMPOSITION RATES AMONG PHOTOSYNTHETIC ORGANISMS - THE IMPORTANCE OF DETRITUS C-N-P CONTENT	1993	{"DUARTE, CM","ENRIQUEZ, S","SANDJENSEN, K"}	{"No Stressor/Restoration"}
1974638	Using phytoplankton and macrophytes to assess the trophic and ecological status of some Italian transitional systems	2014	{"Bon, Daniele","Buosi, Alessandro","Facca, Chiara","Giovannone, Federico","Sfriso, Adriano"}	{"Non Seagrass"}
1978898	DAILY AND YEARLY VARIATIONS OF TOTAL INORGANIC CARBON IN A PRODUCTIVE COASTAL AREA	1990	{"BOUQUEGNEAU, JM","FRANKIGNOULLE, M"}	{"Non Zostera"}
1973002	Salinity and water clarity dictate seasonal variability in coastal submerged aquatic vegetation in subtropical estuarine environments	2019	{"DeMarco, Kristin","Hillmann, Eva R.","La Peyre, Megan K."}	{"Non Seagrass"}
1975168	Eutrophication offsets increased sea urchin grazing on seagrass caused by ocean warming and acidification	2013	{"Burnell, Owen W.","Connell, Sean D.","Irving, Andrew D.","Russell, Bayden D."}	{"Non Zostera"}
1974349	Halimeda dominance in the coastal wedge of Pietra di Finale (Ligurian Alps, Italy): The role of trophic conditions	2015	{"Brandano, Marco","Frezza, Virgilio","Tomassetti, Laura"}	{"Non Seagrass"}
1972961	Canopy-Mediated Hydrodynamics Contributes to Greater Allelic Richness in Seeds Produced Higher in Meadows of the Coastal Eelgrass Zostera marina	2019	{"Follett, Elizabeth","Hays, Cynthia G.","Nepf, Heidi"}	{"No Stressor/Restoration"}
1972781	The Role of Vegetated Coastal Wetlands for Marine Megafauna Conservation	2019	{"Brown, Christopher J.","Connolly, Rod M.","Haig, Jodie A.","Pearson, Ryan M.","Sievers, Michael","Tulloch, Vivitskaia J. D.","Turschwell, Mischa P."}	{"Non Seagrass"}
1977646	Holocene coral reef rubble and its binding agents	2002	{"Rasser, MW","Riegl, B"}	{"Non Seagrass"}
1973861	The necromass of the Posidonia oceanica seagrass meadow: fate, role, ecosystem services and vulnerability	2016	{"Boudouresque, Charles F.","Pergent, Gerard","Pergent-Martini, Christine","Ruitton, Sandrine","Thibaut, Thierry","Verlaque, Marc"}	{"Non Zostera"}
1974495	PILOT APPLICATION OF 3D UNDERWATER IMAGING TECHNIQUES FOR MAPPING POSIDONIA OCEANICA (L.) DELILE MEADOWS	2015	{"BE Menna, F","Bacci, T.","Bruno, F","Bruno, F.","Cappa, P.","Cicero, A. M.","Del Pizzo, S","Di Mento, R.","Irving, A. D.","Lagudi, A.","Montefalcone, M.","Nocerino, E","Penna, M.","Remondino, F","Rende, F. S.","Scalise, S.","Trabucco, B."}	{"Non Zostera"}
1978737	FACTORS AFFECTING PHOTOSYNTHESIS IN THE MOZAMBICAN SEAGRASSES CYMODOCEA-SERRULATA AND THALASSODENDRON-CILIATUM	1993	{"BANDEIRA, SO","CHOINSKI, JS","HEYES, JA","JOHNSON, JM"}	{"Non Zostera","No Restoration Mentioned"}
1977485	Latitudinal variation in life-cycle characteristics of Potamogeton pectinatus L.: vegetative growth and asexual reproduction	2003	{"Hootsmans, M","Pilon, J","Santamaria, L","van Vierssen, W"}	{"Non Seagrass"}
1972598	Seagrass beds acting as a trap of microplastics - Emerging hotspot in the coastal region?	2020	{"Holmer, Marianne","Hu, Jing","Huang, Yuzhou","Perianen, Yuvna Devi","Xiao, Xi","Xu, Caicai"}	{"Non Zostera"}
1979214	THE NUTRITIONAL-VALUE OF ARROW-GRASSES TO GEESE AT JAMES BAY	1980	{"PREVETT, JP","THOMAS, VG"}	{"Non Zostera"}
1977289	Flowering of the seagrass Posidonia oceanica in a north-western Mediterranean coastal area: temporal and spatial variations	2004	{"Balestri, E"}	{"Non Zostera"}
1976795	A multivariate index based on the seagrass Posidonia oceanica (POMI) to assess ecological status of coastal waters under the water framework directive (WFD)	2007	{"Alcoverro, Teresa","Martinez-Crego, Begona","Perez, Marta","Romero, Javier"}	{"Non Zostera"}
1976436	Decreased lipid storage in juvenile Atlantic cod (Gadus morhua) during settlement in cold-water eelgrass habitat	2008	{"Copeman, L. A.","Gregory, R. S.","Parrish, C. C.","Wells, J. S."}	{"No Stressor/Restoration"}
1978349	Forecasting the fishery for pink shrimp, Penaeus duorarum, on the Tortugas Grounds, Florida	1996	{"Sheridan, P"}	{"Non Seagrass"}
1974755	The Badenian parastratotype at Zidlochovice from the perspective of the multiproxy study	2014	{"Brzobohaty, Rostislav","Dolakova, Nela","Hladilova, Sarka","Holcova, Katarina","Hrabovsky, Juraj","Nehyba, Slavomir","Seko, Michal","Utescher, Torsten","Zagorsek, Kamil"}	{"Non Seagrass"}
1975506	The Central Role of Dispersal in the Maintenance and Persistence of Seagrass Populations	2012	{"Cambridge, Marion L.","Carruthers, Tim J. B.","Hovey, Renae","Kendrick, Gary A.","Krauss, Siegfried L.","Lavery, Paul S.","Les, Donald H.","Lowe, Ryan J.","Mascaro I Vidal, Oriol","Ooi, Jillian L. S.","Orth, Robert J.","Rivers, David O.","Ruiz-Montoya, Leonardo","Sinclair, Elizabeth A.","Statton, John","Verduin, Jennifer J.","Waycott, Michelle","van Dijk, Jent Kornelis"}	{"No Stressor/Restoration"}
1975930	Diet and food partitioning between juveniles of mutton Lutjanus analis, dog Lutjanus jocu and lane Lutjanus synagris snappers (Perciformes: Lutjanidae) in a mangrove-fringed estuarine environment	2010	{"Joyeux, J. -C.","Pimentel, C. R."}	{"Non Seagrass"}
1972964	Multi-Frequency, Multi-Sonar Mapping of Shallow HabitatsEfficacy and Management Implications in the National Marine Park of Zakynthos, Greece	2019	{"Blondel, Philippe","Christodoulou, Dimitris","Dimas, Xenophon","Dimitriadis, Charalampos","Fakiris, Elias","Ferentinos, George","Georgiou, Nikos","Geraga, Maria","Kordella, Stavroula","Papatheodorou, George","Rzhanov, Yuri"}	{"Non Zostera","No Restoration Mentioned","Coastal Habitat"}
1975627	Evidence for a sodium efflux mechanism in the leaf cells of the seagrass Zostera marina L.	2011	{"Antonio Fernandez, Jose","Belver, Andres","Jesus Garcia-Sanchez, Maria","Rubio, Lourdes","Venema, Kees"}	{"No Stressor/Restoration"}
1975254	Thermal effects on swimming activity and habitat choice in juvenile Pacific cod (Gadus macrocephalus)	2012	{"Hurst, Thomas P.","Ottmar, Michele L."}	{"Non Seagrass"}
1978044	Vertical secondary flows in submersed plant-like arrays	1999	{"Koch, EW","Nepf, HM"}	{"Non Seagrass"}
1976654	The relationship between seagrass (Posidonia oceanica) decline and sulfide porewater concentration in carbonate sediments	2007	{"Calleja, Maria Ll.","Duarte, Carlos M.","Marba, Nuria"}	{"Non Zostera"}
1976475	Compensation and resistance to herbivory in seagrasses: induced responses to simulated consumption by fish	2008	{"Alcoverro, Teresa","Perez, Marta","Romero, Javier","Verges, Adriana"}	{"Non Zostera"}
1972799	Multi-level phenotypic plasticity and the persistence of seagrasses along environmental gradients in a subtropical lagoon	2019	{"Almeida Saa, Antonella C.","Bercovich, Manuel Vivanco","Horta, Paulo A.","Schubert, Nadine","Silva, Joao"}	{"Non Zostera"}
1973376	Genome-Wide Characterization of Heat-Shock Protein 70s from Chenopodium quinoa and Expression Analyses of Cqhsp70s in Response to Drought Stress	2018	{"Guo, Yaodong","Liu, Jianxia","Liu, Wenying","Wang, Runmei","Wen, Riyu","Zhang, Hongli"}	{"Non Seagrass"}
1978184	Accumulation and transport of seagrass-derived organic matter in reef flat sediment of Green Island, Great Barrier Reef	1998	{"Iizumi, H","Koike, I","Miyajima, T","Yamano, H"}	{"No Stressor/Restoration"}
1978339	Mechanical aquatic weed management in the lower valley of the Rio Negro, Argentina	1996	{"Bezic, C","Britto, A","DallArmellina, A","DallArmellina, V","Gajardo, A","Luna, E"}	{"Non Seagrass"}
1972793	A review onmercury biogeochemistry inmangrove sediments: Hotspots of methylmercury production?	2019	{"Duan, Dandan","Lei, Pei","Pan, Ke","Zhong, Huan"}	{"Non Seagrass"}
1978818	THE EFFECT OF NUTRIENT ENRICHMENT ON A FRESH-WATER COMMUNITY DOMINATED BY MACROPHYTES AND MOLLUSKS AND ITS RELEVANCE TO SNAIL CONTROL	1991	{"DALDORPH, PWG","THOMAS, JD"}	{"Non Seagrass"}
1978227	Assessing the impact of a flood event on Moreton Bay using marine plants as bioindicators of water quality	1998	{"Abal, Eva G.","BA Tibbetts, Ian R.","Costanzo, Simon","Dennison, William C.","Dennison, William C.","Hall, Narelle J.","Heil, Cynthia A.","Horrocks, Janine","Lowe, Scott","O'Donohue, Mark J."}	{"Non Zostera"}
1978256	Photosynthetic temperature responses of fresh- and brackish-water macrophytes: a review	1997	{"Santamaria, L","vanVierssen, W"}	{"Non Seagrass"}
1972664	Community-based monitoring detects catastrophic earthquake and tsunami impacts on seagrass beds in the Solomon Islands	2020	{"Bero, A.","Daniels, A.","Duri, V.","Moseby, K. E.","Soapi, K.","Tropa, W.","Welma, S."}	{"Non Zostera"}
1977273	Regulation of root anaerobiosis and carbon translocation by light and root aeration in Isoetes alpinus	2004	{"Sorrell, BK"}	{"Non Seagrass"}
1976973	Use of acoustic telemetry for spatial management of southern calamary Sepioteuthis australis, a highly mobile inshore squid species	2006	{"Jackson, George D.","Pecl, Gretta T.","Semmens, Jayson M.","Tracey, Sean R."}	{"Non Seagrass"}
1978729	STRUCTURE OF STEM AND CAMBIAL VARIANT IN SPATHOLOBUS-ROXBURGHII (LEGUMINOSAE)	1993	{"NAIR, MNB"}	{"Non Seagrass"}
1977620	Aquatic macrophytes as biomonitors of pollution by textile industry	2002	{"Kempers, AJ","Samecka-Cymerman, A"}	{"Non Zostera"}
1975423	Exotic macroalga Gracilaria vermiculophylla provides superior nursery habitat for native blue crab in Chesapeake Bay	2012	{"Johnston, Cora Ann","Lipcius, Romuald N."}	{"Non Zostera"}
1978050	Growth and energy status of arrowhead tubers, pondweed turions and rice seedlings under anoxic conditions	1999	{"Ishizawa, K","Kawakami, Y","Kuramochi, H","Murakami, S"}	{"Non Seagrass"}
1979152	PHOSPHORUS CYCLING IN A DENSE POTAMOGETON-PECTINATUS L BED	1981	{"ALLANSON, BR","HOWARDWILLIAMS, C"}	{"Non Seagrass"}
1974298	Major Sources of Organic Matter in a Complex Coral Reef Lagoon: Identification from Isotopic Signatures (delta C-13 and delta N-15)	2015	{"Bonnet, Xavier","Briand, Marine J.","Goiran, Claire","Guillou, Gael","Letourneur, Yves"}	{"Non Seagrass","Coastal Habitat"}
1974812	Nutritional and reproductive strategies in a chemosymbiotic bivalve living in a tropical intertidal seagrass bed	2014	{"Ely, Sidi Ould","Nauta, Reindert W.","Piersma, Theunis","Sall, Amadou Abderahmane","van Gils, Jan. A.","van der Geest, Matthijs"}	{"Non Zostera","No Stressor/Restoration","No Restoration Mentioned"}
1973918	A multiproxy study distinguishes environmental change from diagenetic alteration in the recent sedimentary record of the inner Cadiz Bay (SW Spain)	2016	{"Bohorquez, Julio","Casas-Ruiz, Melquiades","Corzo, Alfonso","Garcia-Robledo, Emilio","Jimenez-Arias, Juan L.","Maerz, Christian","Martinez-Lopez, Javier","Papaspyrou, Sokratis","Pilar Mata, M.","Poulton, Simon W.","Sanchez-Bellon, Angel"}	{"Non Seagrass"}
1973230	Foraging ecology and diet selection of juvenile green turtles in the Bahamas: insights from stable isotope analysis and prey mapping	2018	{"Ceriani, Simona A.","Fuentes, Mariana M. P. B.","Gillis, Anthony J.","Seminoff, Jeffrey A."}	{"Non Seagrass"}
1979105	RELATIVE EFFICIENCY OF 2 CLAM RAKES AND THEIR CONTRASTING IMPACTS ON SEAGRASS BIOMASS	1983	{"FEGLEY, SR","PETERSON, CH","SUMMERSON, HC"}	{"Non Zostera"}
1974406	Consumer Depletion Alters Seagrass Resistance to an Invasive Macroalga	2015	{"Bernardi, Giuseppe","Calabretti, Chiara","Caronni, Sarah","Ceccherelli, Giulia","Delaria, Maria Anna","Navone, Augusto","Occhipinti-Ambrogi, Anna","Panzalis, Pieraugusto"}	{"Non Zostera"}
1973590	Identification of the abiotic stress-related transcription in little Neptune grass Cymodocea nodosa with RNA-seq	2017	{"Dadali, O.","Danis, T.","Exadactylos, A.","Kavouras, M.","Kupper, F. C.","Malandrakis, E.","Miliou, H.","Orfanidis, S.","Panagiotaki, P.","Tsioli, S."}	{"Non Zostera"}
1972878	Self-organisation in striped seagrass meadows affects the distributional pattern of the sessile bivalve Pinna nobilis	2019	{"Bressan, Monica","Camedda, Andrea","Conforti, Alessandro","Coppa, Stefania","Cucco, Andrea","De Falco, Giovanni","Domenici, Paolo","Massaro, Giorgio","Quattrocchi, Giovanni","Satta, Andrea","Tonielli, Renato","Vencato, Sara","de Lucia, Giuseppe Andrea"}	{"Non Seagrass"}
1972924	Negative effects of warming on seagrass seedlings are not exacerbated by invasive algae	2019	{"Pereda-Briones, L.","Terrados, J.","Tomas, F."}	{"Non Zostera","No Restoration Mentioned"}
1975755	Involvement of plasma membrane H plus -ATPase in anoxic elongation of stems in pondweed (Potamogeton distinctus) turions	2011	{"Hara, Yoshinao","Ishizawa, Kimiharu","Koizumi, Yayoi","Sakano, Katsuhiro","Yazaki, Yoshiaki"}	{"Non Seagrass"}
1974753	Seasonal changes in benthic algal communities of the upper subtidal zone in Sanya Bay ( Hainan Island, China)	2014	{"Huang, Hui","Li, Xiubao","Titlyanova, Tamara V.","Tytlyanov, Eduard A."}	{"Non Seagrass"}
1978484	THE EFFECT OF TEMPERATURE AND DAYLENGTH ON THE GERMINATION OF POTAMOGETON NODOSUS TUBERS	1995	{"FLINT, NA","MADSEN, JD"}	{"Non Seagrass"}
1977577	Growth of northern [Mercenaria mercenaria (L.)] and southern [M-campechiensis (Gmelin)] quahogs: Influence of seagrasses and latitude	2002	{"Coen, LD","Heck, KL","Wilson, DM"}	{"Non Seagrass"}
1976628	The contribution of scarid herbivory to seagrass ecosystem dynamics in the Indo-Pacific	2007	{"Bell, James J.","Powell, Abigail","Smith, David J.","Taylor, Joe D.","Unsworth, Richard K. F."}	{"Non Zostera"}
1978738	On the soil of Triglochin maritimum Linn. community in Aioi Bay Area, Hyogo Prefecture	1993	{"Ono, Hajime","Takahashi, Takehiko","Yamamoto, Kazukiyo"}	{"Non Zostera"}
1975578	Sediment Dynamics in the Bay of Marseille, Gulf of Lions (France): Hydrodynamic Forcing vs. Bed Erodibility	2011	{"Cann, Philippe","Dufois, Francois","Meule, Samuel","Pinazo, Christel","Plomaritis, Theocharis A.","Sauzade, Didier","Verney, Romaric","Vousdoukas, Michalis I."}	{"Non Zostera"}
1976074	MANGROVE FORESTS OF THE WAKATOBI NATIONAL PARK	2010	{"BE Clifton, J","Cragg, Simon M.","Hendy, Ian W.","Smith, DJ","Unsworth, RKF"}	{"Non Seagrass","Coastal Habitat"}
1978709	The relationships between hydrochemical environmental factors and the aquatic macrophytic vegetation in stagnant and slow flowing waters: I. Water quality and distribution of aquatic associations	1993	{"Babalonas, D.","Papastergiadou, E."}	{"Non Seagrass"}
1974183	Chain of eutrophication models for assessing the potential impact of nutrient enrichment on Choctawhatchee Bay, FL, USA	2015	{"Canfield, Daniel E., Jr.","Hoyer, Mark V.","Terrell, Julia B."}	{"Non Zostera"}
1972813	Present-Day Distribution and Potential Spread of the Invasive Green Alga Avrainvillea amadelpha Around the Main Hawaiian Islands	2019	{"Spalding, Heather L.","Toonen, Robert","Veazey, Lindsay","Wade, Rachael","Williams, Olivia"}	{"Non Seagrass","Non Zostera","No Stressor/Restoration","No Restoration Mentioned"}
1977832	Effects of in situ experimental shading on the Mediterranean seagrass Posidonia oceanica	2001	{"Romero, J","Ruiz, JM"}	{"Non Zostera"}
1973410	Marine Ecosystems of Andaman and Nicobar Islands - Species Abundance and Distribution	2018	{"BE Sivaperuman, C","Das, Apurba Kumar","Dharani, Gopal","Jaisankar, I","Kirubagaran, Ramalingam","Raghunathan, Chelladurai","Sathish, Thadikamala","Singh, AK","Sivaperuman, Chandrakasan","Sujathkumar, Nambali Valsalan","Velmurugan, A","Vinithkumar, Nambali Valsalan"}	{"No Stressor/Restoration"}
1979148	CHANGES OCCURRING DURING AGING AND SENESCENCE IN A SUBMERGED AQUATIC ANGIOSPERM (POTAMOGETON-PECTINATUS)	1982	{"CHOUDHURI, MA","JANA, S"}	{"Non Seagrass"}
1974545	Modular mobile foundation species as reservoirs of biodiversity	2014	{"Altieri, Andrew H.","Witman, Jon D."}	{"Non Seagrass"}
1974702	Seasonal uncoupling of demographic processes in a marine clonal plant	2014	{"Mascaro, O.","Perez, M.","Romero, J."}	{"Non Zostera"}
1975886	Differences in tolerance of pondweeds and charophytes to vertebrate herbivores in a shallow Baltic estuary	2010	{"Bakker, E. S.","Hidding, B.","Keuper, F.","Nolet, B. A.","de Boer, T.","de Vries, P. P."}	{"Non Seagrass"}
1974762	Mechanisms and ecological role of carbon transfer within coastal seascapes	2014	{"Connolly, Rod M.","Hyndes, Glenn A.","Lavery, Paul S.","McLeod, Rebecca J.","Nagelkerken, Ivan","Vanderklift, Mathew A."}	{"Non Zostera"}
1977113	Spatial and seasonal variability in elemental content, delta C-13, and delta N-15 of Thalassia testudinum from South Florida and its implications for ecosystem studies	2005	{"Anderson, WT","Escorcia, SP","Fourqurean, JW","Zieman, JC"}	{"Non Zostera","No Restoration Mentioned"}
1978904	LIGHT AVAILABILITY AND DIURNAL GROWTH OF A GREEN MACROALGA (CAULERPA-CUPRESSOIDES) AND A SEAGRASS (HALOPHILA-DECIPIENS)	1990	{"DENNISON, WC","WILLIAMS, SL"}	{"Non Zostera"}
1973768	Quantifying macrodetritus fluxes from a small temperate estuary	2017	{"Gladstone-Gallagher, Rebecca V.","Lohrer, Andrew M.","Lundquist, Carolyn J.","Pilditch, Conrad A.","Sandwell, Dean R."}	{"Non Seagrass"}
1979290	EXPERIMENTAL STUDIES ON FLOWERING AND REPRODUCTION IN SEAGRASSES	1976	{"MCMILLAN C"}	{"Non Zostera"}
1976840	Coastal groundwater discharge - an additional source of phosphorus for the oligotrophic wetlands of the Everglades	2006	{"Fourqurean, James W.","Price, Rene M.","Swart, Peter K."}	{"Non Seagrass"}
1975957	Production of chromophoric dissolved organic matter from mangrove leaf litter and floating Sargassum colonies	2010	{"Bartels, Erich","Lee, Rosalynn","Shank, G. Christopher","Vahatalo, Anssi","Zepp, Richard G."}	{"Non Seagrass"}
1975673	Methylene blue adsorption on activated carbon prepared from Posidonia oceanica (L.) dead leaves: Kinetics and equilibrium studies	2011	{"Cavas, Levent","Dural, Mehmet Ulas","Katsaros, Fotis K.","Papageorgiou, Sergios K."}	{"Non Zostera"}
1976943	Monitoring toxic cyanobacteria Lyngbya majuscula (Gomont) in Moreton Bay, Australia by integrating satellite image data and field mapping	2006	{"Brando, VE","Dekker, AG","Dennison, WC","Phinn, SR","Roelfsema, CM"}	{"Non Seagrass"}
1973096	Reviews and syntheses: Pb-210-derived sediment and carbon accumulation rates in vegetated coastal ecosystems - setting the record straight	2018	{"Arias-Ortiz, Ariane","Duarte, Carlos M.","Garcia-Orellana, Jordi","Lavery, Paul S.","Lovelock, Catherine E.","Marba, Nuria","Masque, Pere","Mazarrasa, Ines","Serrano, Oscar"}	{"No Stressor/Restoration"}
1979046	GROWTH OF JUVENILE MILKFISH CHANOS-CHANOS IN A NATURAL HABITAT	1985	{"BAGARINAO, T","KUMAGAI, S","UNGGUI, A"}	{"Non Seagrass"}
1976643	Effects of exogenous abscisic acid on tolerance of Potamogen crispus to Cd2+ stress.	2007	{"Ji, Wang-dong","Shi, Guo-xin","Xu, Qin-song","Xu, Ye","Yuan, Qiu-hong","Zhang, Hui"}	{"Non Seagrass"}
1977904	Distributional pattern of seagrasses in the Canary Islands (Central-East Atlantic Ocean)	2000	{"Haroun, R","Hernandez-Guerra, A","Herrera, R","Pavon-Salas, N"}	{"No Stressor/Restoration"}
1977920	Rapid direct and indirect effects of a single nutrient pulse in a seaweed-epiphyte-grazer system	2000	{"Sommer, U","Worm, B"}	{"Non Seagrass"}
1976791	Meadows of the seagrass Posidonia oceanica are a significant source of organic matter for adjoining ecosystems	2007	{"Aguilar, A.","Borrell, A.","Cardona, L.","Revelles, M.","Sales, M."}	{"Non Zostera"}
1979310	INFLUENCE OF LIGHT-INTENSITY AND NUTRIENTS ON LABORATORY CULTURE OF SEAGRASSES	1974	{"ELIAS, RW","KOCH, SJ","SMITH, BN"}	{"Non Zostera"}
1977429	Integral growth of submersed macrophytes in varying light regimes	2003	{"Herb, WR","Stefan, HG"}	{"Non Seagrass"}
1972527	Observations of Turbulence at a Near-Surface Temperature Front in the Arctic Ocean	2020	{"Fer, Ilker","Fossum, Trygve O.","Koenig, Zoe","Kolas, Eivind","Ludvigsen, Martin","Norgren, Petter"}	{"Non Seagrass"}
1977044	Carbon and nitrogen stable isotope analysis of an Amphibolis griffithii seagrass bed	2005	{"Brearley, A","Hyndes, GA","Lavery, PS","Smit, AJ","Walker, DI"}	{"Non Zostera"}
1973574	Peach tree seedling cuttage propagation method involves selecting cuttage branch, preparing seedling substrate, choosing cuttage bottom end, pruning, soaking in water, dipping in yellow soil slurry, and inserting into seedling substrate	NA	{"MAI L"}	{"Non Seagrass"}
1973545	Spatial and temporal variability in macroalgal blooms in a eutrophied coastal estuary	2017	{"Deacutis, Christopher","Green, Lindsay","Guidone, Michele","Palmisciano, Melissa","Ramsay, Christine N.","Thornber, Carol S."}	{"Non Seagrass"}
1976388	Particulate phosphorus transformations in south Florida stormwater treatment areas used for Everglades protection	2008	{"DeBusk, Thomas A.","Dierberg, Forrest E."}	{"Non Seagrass"}
2545946	Combining laparoscopy and satellite tracking: Successful round-trip tracking of female green turtles from feeding areas to nesting grounds and back	2020	{"Antonopoulou, Marina A.","Bugla, Ibrahim Abdullah","Das, Himansu Sekhar","Mateos-Molina, Daniel","Pilcher, Nicolas James","Rodriguez-Zarate, Clara Jimena"}	{"Non Seagrass"}
1974325	Effects of short flexible seagrass Zostera noltei on flow, erosion and deposition processes determined using flume experiments	2015	{"Ganthy, Florian","Sauriau, Pierre-Guy","Soissons, Laura","Sottolichio, Aldo","Verney, Romaric"}	{"No Stressor/Restoration"}
1973331	MACROALGAL AND SEAGRASS DIETS ALTER EPIBIOTIC BACTERIAL COMMUNITIES ON THE BLUE CRAB CALLINECTES SAPIDUS AND THE AMERICAN LOBSTER HOMARUS AMERICANUS	2018	{"Ailstock, M. Stephen","Bushmann, Paul J.","Kim, Anita","Levantine, Paulette","Nichols, Rebecca","Tlusty, Michael F."}	{"No Stressor/Restoration"}
1979167	DYNAMICS OF CARBON AND NITROGEN DURING THE DECOMPOSITION OF DETRITUS DERIVED FROM ESTUARINE MACROPHYTES	1981	{"RICE, DL","TENORE, KR"}	{"Non Zostera"}
1977089	Response of benthic protozoa and thraustochytrid protists to fish farm impact in seagrass (Posidonia oceanica) and soft-bottom sediments	2005	{"Bongiorni, L","Danovaro, R","Mirto, S","Pusceddu, A"}	{"Non Zostera","No Restoration Mentioned"}
1972993	From habitat geometry to ecosystem functions in marine mussel beds	2019	{"Archambault, Philippe","Guichard, Frederic","Paquette, Laurence"}	{"Non Seagrass","Coastal Habitat"}
1975160	The Effects of Water Parameters on Monthly Seagrass Percentage Cover in Lawas, East Malaysia	2013	{"Ahmad-Kamil, E. I.","Al-Obaidi, J. R.","Bali, J.","Jaaman, S. A.","Ramli, R."}	{"Non Zostera"}
1973152	Nitrate drawdown during a shelf sea spring bloom revealed using a novel microfluidic in situ chemical sensor deployed within an autonomous underwater glider	2018	{"Beaton, Alexander D.","Hopkins, Joanne E.","Lohan, Maeve C.","Mowlem, Matthew","Pascal, Robin W.","Vincent, Alexander G.","Walk, John","Woodward, E. Malcolm S."}	{"Non Seagrass"}
1978874	RESPONSE OF SAGO PONDWEED, A SUBMERGED AQUATIC MACROPHYTE, TO HERBICIDES IN 3 LABORATORY CULTURE SYSTEMS	1991	{"AILSTOCK, MS","BE GORSUCH, JW","FLEMING, WJ","LEWIS, MA","LOWER, WR","MOMOT, JJ","NORMAN, CM","WANG, WC"}	{"Non Seagrass"}
1972675	Preferential assimilation of seagrass detritus by two coexisting Mediterranean sea cucumbers: Holothuria polii and Holothuria tubulosa	2019	{"Boncagni, Paola","Fianchini, Alessandra","Rakaj, Arnold","Vizzini, Salvatrice"}	{"Non Zostera","No Stressor/Restoration"}
1975860	Effects of CO2 Enrichment on Photosynthesis, Growth, and Biochemical Composition of Seagrass Thalassia hemprichii (Ehrenb.) Aschers	2010	{"Huang, Xiao-Pin","Jiang, Zhi Jian","Zhang, Jing-Ping"}	{"Non Zostera"}
1976928	Shoot organization in the seagrass zostera noltii: implications for space occupation and plant architecture	2006	{"Brun, FG","Hernandez, I","Perez-Llorens, JL","Perez-Pastor, A","Vergara, JJ"}	{"No Stressor/Restoration","No Restoration Mentioned"}
1976685	Long-term movements of tiger sharks satellite-tagged in Shark Bay, Western Australia	2007	{"Dill, Lawrence M.","Heithaus, Linda I.","Heithaus, Michael R.","Wirsing, Aaron J."}	{"Non Seagrass"}
1978713	FUNCTIONAL LEAF ANATOMY AND ULTRASTRUCTURE IN A MARINE ANGIOSPERM, SYRINGODIUM-ISOETIFOLIUM (ASCHERS) DANDY (CYMODOCEACEAE)	1993	{"KUO, J"}	{"Non Zostera"}
1972941	Analyses on the Temporal and Spatial Characteristics of Water Quality in a Seagoing River Using Multivariate Statistical Techniques: A Case Study in the Duliujian River, China	2019	{"Huang, Hai","Huang, Tousheng","Liang, Xiaoqian","Sun, Xuewei","Wang, Zhongyu","Zhang, Huayong","Zhong, Meifang"}	{"Non Seagrass"}
1975750	Seasonal response of Posidonia oceanica to light disturbances	2011	{"Mateo, M. A.","Renom, P.","Serrano, O."}	{"Non Zostera"}
1974718	Simultaneous 2D Imaging of Dissolved Iron and Reactive Phosphorus in Sediment Porewaters by Thin-Film and Hyperspectral Methods	2014	{"Anschutz, Pierre","Cesbron, Florian","Deflandre, Bruno","Delgard, Marie-Lise","Geslin, Emmanuelle","Jezequel, Didier","Launeau, Patrick","Metzger, Edouard","Thibault de Chanvalon, Aubin"}	{"Non Seagrass"}
1974887	How much sampling does it take to detect trends in coral-reef habitat using photoquadrat surveys?	2013	{"Evanson, M.","Koldewey, H. J.","Marcus, J. E.","Molloy, P. P.","Nellas, A. C.","Rist, J. L.","Vincent, A. C. J."}	{"Non Seagrass"}
1976411	Spatial and temporal variability of juvenile spotted seatrout Cynoscion nebulosus growth in Chesapeake Bay	2008	{"Jones, C. M.","Smith, N. G.","Van Montfrans, J."}	{"Non Seagrass"}
1976208	PRACTICE AND IMPLICATION OF ESTABLISHING AQUATIC VEGETATION IN LAKE YUEHU IN WUHAN, CHINA	2009	{"Cheng Shui-Ping","He Feng","Ma Jian-Min","Wu Juan","Wu Zhen-Bin","Zhang Zheng","Zhao Qiang","Zuo Jin-Cheng"}	{"Non Seagrass"}
1977457	Characterization of urease-positive thermophilic Campylobacter subspecies by multilocus enzyme electrophoresis typing	2003	{"Kaneko, A","Matsuda, M","Millar, BC","Miyajima, M","Moore, JE","Murphy, PG","Stanley, T"}	{"Non Seagrass"}
1978003	Effectiveness of reducing external nutrient load entering a eutrophicated shallow lake ecosystem in the Naardermeer nature reserve, The Netherlands	1999	{"Barendregt, A","Bootsma, MC","van Alphen, JCA"}	{"Non Seagrass"}
1972489	Effects of titanium dioxide nanoparticles on leaf cell structure and viability, and leaf elongation in the seagrass Halophila stipulacea	2020	{"Kevrekidis, Theodoros","Malea, Paraskevi","Mylona, Zoi","Panteris, Emmanuel"}	{"Non Zostera"}
1977140	Biological resources of the Louisiana coast: Part 1. An overview of coastal plant communities of the Louisiana Gulf shoreline	2005	{"Franze, CD","Hester, MW","Spalding, EA"}	{"Non Zostera"}
1978577	THE ROLE OF BACTERIA IN NUTRIENT RECYCLING IN TROPICAL MANGROVE AND OTHER COASTAL BENTHIC ECOSYSTEMS	1994	{"ALONGI, DM"}	{"Non Seagrass","Coastal Habitat"}
1979181	DEVELOPMENT OF NORTH AMERICAN SEAGRASSES IN NATURAL ENVIRONMENTS	1981	{"PHILLIPS R C"}	{"No Stressor/Restoration"}
1975270	Trophic diversity in amphipods within a temperate eelgrass ecosystem as determined by gut contents and C and N isotope analysis	2012	{"Jeong, Seung Jin","Kang, Chang-Keun","Suh, Hae-Lip"}	{"No Stressor/Restoration"}
1977298	CYTOPHYSIOLOGICAL FEATURES OF POSIDONIA OCEANICA AS PUTATIVE MARKERS OF ENVIRONMENTAL CONDITIONS	2004	{"Bitonti, M. B.","Chiappetta, A.","Cozza, R.","Innocenti, A. M.","Petrarulo, M.","Rende, F.","Salimonti, A."}	{"Non Zostera"}
1976924	Variation in larval growth can predict the recruitment of a temperate, seagrass-associated fish	2006	{"Jenkins, GP","King, D"}	{"Non Seagrass","Coastal Habitat"}
1974450	Ontogenetic dietary and habitat shifts in goliath grouper Epinephelus itajara from French Guiana	2015	{"Artero, C.","Berzins, R.","Bouchon, C.","Guillou, G.","Koenig, C. C.","Lampert, L.","Richard, P."}	{"Non Seagrass"}
2100175	The Anthropogenic Nitrogen Footprint of a Tropical Lagoon: Spatial Variability in Padina sp. delta N-15 Values	2020	{"Baker, David M.","Duprey, Nicolas N.","Geeraert, Naomi","Goldstein, Benjamin R.","Kim, Kiho","LaRoche, Carly","McIlroy, Shelby E.","Raymundo, Laurie J.","Thompson, Philip D."}	{"Non Seagrass"}
1973909	Uniting paradigms of connectivity in marine ecology	2016	{"Brown, Christopher J.","Harborne, Alastair R.","Mumby, Peter J.","Paris, Claire B."}	{"Non Seagrass"}
1975180	Substratum associations and depth distribution of benthic invertebrates in saline Walker Lake, Nevada, USA	2013	{"Herbst, David B.","Jellison, Robert","Medhurst, R. Bruce","Roberts, Scott W."}	{"Non Seagrass"}
1974144	Bio-refining of perennial ryegrass (Lolium perenne): evaluation of aqueous extracts for plant defence elicitor activity using French bean cell suspension cultures	2016	{"Carmichael, Eugene","Selby, Christopher","Sharma, H. S. Shekhar"}	{"Non Seagrass"}
1973150	Long range transport and carbon and nitrogen dynamics of floating seagrass wracks in Greater Florida Bay	2018	{"Dierssen, Heidi M.","Perry, Rachel A.","Vaudrey, Jamie M. P."}	{"Non Zostera"}
1979120	MORPHOLOGY, ANATOMY AND HISTOCHEMISTRY OF THE AUSTRALIAN SEAGRASSES OF THE GENUS POSIDONIA KONIG (POSIDONIACEAE) .3. POSIDONIA-SINUOSA CAMBRIDGE AND KUO	1982	{"CAMBRIDGE, ML","KUO, J"}	{"Non Zostera"}
1975375	Influence of Silts on the Growth, Reproduction and Chlorophyll Fluorescence of Potamogeton crispus in Turbid Water	2012	{"Li, Qiang"}	{"Non Seagrass"}
1978391	Effects of environmental manipulations on Triglochin palustris: Implications for the role of goose herbivory in controlling its distribution	1996	{"Mulder, CPH","Ruess, RW","Sedinger, JS"}	{"Non Seagrass"}
1975790	Spatial and temporal patterns in Serranus cabrilla habitat use in the NW Mediterranean revealed by acoustic telemetry	2011	{"Alos, Josep","Grau, Amalia","March, David","Morales-Nin, Beatriz","Palmer, Miquel"}	{"Non Seagrass"}
1977608	Atrophic cascade regulates salt marsh primary production	2002	{"Bertness, MD","Silliman, BR"}	{"Non Seagrass"}
1976259	Growth rates of the tropical sea urchins Tripneustes ventricosus and Lytechinus variegatus based on natural recruitment events	2009	{"Macia, Silvia","Robinson, Michael P."}	{"Non Seagrass"}
1973012	TECHNIQUES USED TO INCREASE RECAPTURE RATES OF DWARF SEA-HORSES (HIPPOCAMPUS ZOSTERAE) IN TAMPA BAY: IMPLICATIONS FOR POPULATION ESTIMATES AND MOVEMENT PATTERNS.	2019	{"Masonjones, Heather Dawne","Masonjones, Michael Christopher","Rose, Emily"}	{"Non Zostera"}
1975268	Assessment of the aquatic biodiversity of a threatened coastal lagoon at Bimini, Bahamas	2012	{"DiBattista, Joseph D.","Franks, Bryan R.","Grubbs, R. Dean","Gruber, Samuel H.","Hussey, Nigel E.","Jennings, David E.","Stump, Kristine L."}	{"Non Seagrass","Non Zostera"}
1975996	The fate of cyanobacterial blooms in vegetated and unvegetated sediments of a shallow eutrophic lake: A stable isotope tracer study	2010	{"Gu, Binhe","Li, Kuanyi","Liu, Zhengwen"}	{"Non Seagrass"}
1976827	Community photosynthesis of aquatic macrophytes	2006	{"Binzer, Thomas","Middelboe, Anne-Lise","Sand-Jensen, Kaj"}	{"No Stressor/Restoration"}
1975174	Physical and biological effects of introduced oysters on biodiversity in an intertidal boulder field	2013	{"Crowe, Tasman P.","Green, Dannielle S."}	{"Non Seagrass"}
1975386	Nutrients and water level fluctuations: A study of three aquatic plants	2012	{"Deegan, B. M.","Ganf, G. G.","White, S. D."}	{"Non Seagrass"}
1975341	Effects of Potamogeton crispus L. on the fate of phthalic acid esters in an aquatic microcosm	2012	{"Chi, Jie","Yang, Qing"}	{"Non Seagrass"}
1976090	Coral Reefs and Ocean Acidification	2009	{"Kleypas, Joan A.","Yates, Kimberly K."}	{"Non Seagrass","Coastal Habitat"}
2545982	Promoting self-facilitating feedback processes in coastal ecosystem engineers to increase restoration success: Testing engineering measures	2020	{"Belzen, Jim","Bouma, Tjeerd J.","Capelle, Jacob J.","Koppel, Johan","Schotanus, Jildou","Walles, Brenda"}	{"Non Seagrass"}
1973082	Estimating the Potential Fishery Benefits from Targeted Habitat Repair: a Case Study of School Prawn (Metapenaeus macleayi) in the Lower Clarence River Estuary	2018	{"Creighton, Colin","Taylor, Matthew D."}	{"Non Seagrass"}
1976262	Relationships Between Tropical Coastal Habitats and (offshore) Fisheries	2009	{"BE Nagelkerken, I","Blaber, Stephen J. M."}	{"No Stressor/Restoration"}
1979031	THE INFLUENCE OF PREDATORY DECAPODS, REFUGE, AND MICROHABITAT SELECTION ON SEAGRASS COMMUNITIES	1985	{"LEBER, KM"}	{"No Stressor/Restoration"}
1976355	Community oxygen and nutrient fluxes in seagrass beds of Florida Bay, USA	2008	{"Carlson, Paul R., Jr.","Yarbro, Laura A."}	{"Non Zostera"}
1972807	The endangered White's seahorse Hippocampus whitei chooses artificial over natural habitats	2019	{"Coleman, Ross A.","Harasti, David","Morris, Rebecca L.","Simpson, Michael"}	{"Non Seagrass"}
1977828	Population genetic structure of Potamogeton anguillanus in Lake Shinji, Japan	2001	{"Iida, Satoko","Kadono, Yasuro"}	{"Non Zostera"}
1974366	Differences in food web structure of mangroves and freshwater marshes: evidence from stable isotope studies in the Southern Gulf of Mexico	2015	{"Mendoza-Carranza, Manuel","Ponce-Mendoza, Alejandro","Saint-Paul, Ulrich","Sepulveda-Lozada, Alejandra","Wolff, Matthias"}	{"No Stressor/Restoration"}
1973053	Impacts of Animal Herbivory and Water Depth on Seed Germination and Seedling Survival of Vallisneria natans (Lour.) Hara and Hydrilla verticillata (L. f.) Royle	2019	{"He, Feng","Lin, Qingwei","Liu, Biyun","Min, Fenli","Sun, Jian","Wu, Zhenbin","Zhang, Yi","Zuo, Jincheng"}	{"Non Seagrass"}
1973783	Reproductive investment of the pen shell Pinna nobilis (Bivalvia, Pinnidae) Linnaeus, 1758 in Cabrera National Park, Spain	2017	{"Alomar, C.","Alvarez, E.","Deudero, S.","Grau, A.","Hendriks, I. E.","Vazquez-Luis, M."}	{"Non Seagrass"}
1975778	Temporal variation in biomass partitioning of the seagrass Cymodocea nodosa at the Gulf of Thessaloniki, Greece	2011	{"Malea, Paraskevi","Zikidou, Christina"}	{"Non Zostera"}
1974908	Using near infra red reflectance spectroscopy (NIRS) to quantify tissue composition in the seagrass Posidonia australis	2013	{"Bain, Keryn F.","Poore, Alistair G. B.","Verges, Adriana"}	{"Non Zostera"}
1974346	The Dynamics of Plant-Mediated Sediment Oxygenation in Spartina anglica Rhizospheres-a Planar Optode Study	2015	{"Koop-Jakobsen, Ketil","Wenzhoefer, Frank"}	{"Non Seagrass"}
1974440	Food Chains and Nutrient Cycles	2015	{"BE Krauss, GJ","Baerlocher, Felix","Nies, DH","Rennenberg, Heinz"}	{"No Stressor/Restoration"}
1977994	Physico-chemical characteristics and pollution level of lake Nainital (UP, India): Role of macrophytes and phytoplankton in biomonitoring and phytoremediation of toxic metal ions	1999	{"Ali, MB","Pal, A","Rai, UN","Singh, SP","Tripathi, RD"}	{"Non Seagrass"}
1977914	Organic matter composition of the continental shelf and bathyal sediments of the Cretan Sea (NE Mediterranean)	2000	{"Akoumianiki, I","Danovaro, R","Dell'Anno, A","Marrale, D","Polychronaki, T","Pusceddu, A","Tselepides, A"}	{"Non Seagrass"}
1978353	Sediment biogeochemistry in an East African mangrove forest (Gazi Bay, Kenya)	1996	{"Middelburg, JJ","Nieuwenhuize, J","Ohowa, B","Slim, FJ"}	{"Non Seagrass"}
1978436	The production and trophic ecology of shallow-water fish assemblages in southern Australia .1. Species richness, size-structure and production of fishes in Western Port, Victoria	1995	{"Edgar, GJ","Shaw, C"}	{"Non Seagrass"}
1975444	Epiphytes mediate the trophic role of sea urchins in Thalassia testudinum seagrass beds	2012	{"Cebrian, Just","Heck, Kenneth L.","Luis Sanchez-Lizaso, Jose","Marco-Mendez, Candela","Prado, Patricia"}	{"Non Zostera"}
1976663	Impact of differential predation potential on eelgrass (Zostera marina) faunal community structure	2007	{"Bologna, Paul A. X."}	{"No Stressor/Restoration"}
1977636	Changes in seagrass coverage in Cockburn Sound, Western Australia between 1967 and 1999	2002	{"Aylward, MJ","Cambridge, ML","Hegge, BJ","Hillman, K","Kendrick, GA","Lord, DA","Wyllie, A"}	{"Non Zostera"}
1976211	Role of two contrasting ecosystem engineers (Zostera noltii and Cymodocea nodosa) on the food intake rate of Cerastoderma edule	2009	{"Bouma, Tjeerd J.","Brun, Fernando G.","Cacabelos, Eva","van Zetten, Elleke"}	{"No Stressor/Restoration"}
1975662	Long-Term Effects of Adding Nutrients to an Oligotrophic Coastal Environment	2011	{"Armitage, Anna R.","Fourqurean, James W.","Frankovich, Thomas A."}	{"Non Zostera"}
1975985	Carbon, nitrogen and antioxidant enzyme responses of Potamogeton crispus to both low light and high nutrient stresses	2010	{"Cao, Te","Li, Zhongqiang","Ni, Leyi","Xie, Ping","Zhang, Meng"}	{"Non Zostera"}
1974699	Seasonal and spatial variations of water quality, substrate and aquatic macrophytes based on side scan sonar, in an eastern Mediterranean lagoon (Kaiafas, Ionian Sea)	2014	{"Christia, Chrysoula","Geraga, Maria","Papadakis, Emmanouil","Papastergiadou, Eva","Papatheodorou, George"}	{"Non Seagrass"}
2100395	Prediction of potential distribution areas of Chinese horseshoe crab and mangrove horseshoe crab in the Beibu Gulf of Guangxi based on MAXENT model and their population conservation strategies.	2019	{"Hu Menghong","Li Qiongzhen","Song Jie","Wang Youji","Wang Zhenhua","Yan Mingyan"}	{"Non Seagrass"}
1978648	ABUNDANCE AND SEASONALITY OF MEIOFAUNA, INCLUDING HARPACTICOID COPEPOD SPECIES, ASSOCIATED WITH STEMS OF THE SALT-MARSH CORD GRASS, SPARTINA-ALTERNIFLORA	1993	{"FLEEGER, JW","RUTLEDGE, PA"}	{"Non Seagrass"}
1975290	Sources of primary production supporting food webs in an arid coastal embayment	2012	{"Al-Maslamani, I.","Kennedy, H.","Le Vay, L.","Walton, M. E. M."}	{"Non Zostera"}
1978861	TEMPERATURE-ACCLIMATION OF RESPIRATION AND PHOTOSYNTHESIS IN THE BROWN ALGA LAMINARIA-SACCHARINA	1991	{"DAVISON, IR","GREENE, RM","PODOLAK, EJ"}	{"Non Seagrass"}
1974520	Moderate stoichiometric homeostasis in the sea urchin Lytechinus variegatus: effects of diet and growth on C:N:P ratios	2014	{"Cebrian, Just","Heck, Kenneth L., Jr.","Prado, Patricia"}	{"Non Seagrass"}
1974927	Context-specific effects of the identity of detrital mixtures on invertebrate communities	2013	{"Bishop, Melanie J.","Kelaher, Brendan P."}	{"Non Seagrass"}
1974269	Fish assemblages in locations with alternative structured habitats in an eelgrass, Zostera, dominated bay: Biodiversity value and potential for refuge	2015	{"Brown, Andrew","Coleman, Rhys","Jenkins, Gregory P.","Kenner, Tim"}	{"No Stressor/Restoration"}
1977482	Watershed scale assessment of nitrogen and phosphorus loadings in the Indian River Lagoon basin, Florida	2003	{"Sigua, GC","Tweedale, WA"}	{"Non Zostera"}
1973580	Understanding Aquaporin Transport System in Eelgrass (Zostera marina L.), an Aquatic Plant Species	2017	{"Belanger, Richard R.","Bhat, Javaid A.","Deshmukh, Rupesh","Shivaraj, S. M.","Sonah, Humira"}	{"No Stressor/Restoration"}
1978856	TOLERANCE OF WOODY NURSERY STOCK TO CLASSIC CHLORIMURON AND HARMONY THIAMETURON	1991	{"DERR J F"}	{"Non Seagrass"}
1977341	Boat anchoring on Posidonia oceanica beds in a marine protected area (Italy, western Mediterranean): effect of anchor types in different anchoring stages	2004	{"Badalamenti, F","Ceccherelli, G","Chemello, R","Milazzo, M"}	{"Non Zostera","No Stressor/Restoration"}
1973994	Rapid growth and short life spans characterize pipefish populations in vulnerable seagrass beds	2016	{"Booth, D. J.","Parkinson, K. L."}	{"Non Seagrass"}
1978843	ECOLOGY AND PRODUCTION OF NEBALIA SP (CRUSTACEA, LEPTOSTRACA) IN A SHALLOW-WATER SEAGRASS COMMUNITY	1991	{"RAINER, SF","UNSWORTH, P"}	{"Non Seagrass"}
1978439	Productivity and nutrient dynamics of tropical sea-grass communities in Puttalam Lagoon, Sri Lanka	1995	{"Johnson, P","Johnstone, R"}	{"Non Zostera"}
1974031	Producing soil conditioner used as plant growth promoter, by mixing fermentation agent, seagrass, kelp, straw and non-starch polysaccharide enzyme mix, fermenting, composting, adding oyster and humic acid, grinding and drying pellets	NA	{"DAN L","LI J","LIU H","MA D","SHAN J","SU L"}	{"No Stressor/Restoration"}
1974599	Effects of urban effluents on spatial structure, morphology and total phenols of Posidonia oceanica: Comparison with a reference site	2014	{"Boudefoua, Nassima","Boumaza, Rachid","Boumaza, Salima","Semroud, Rachid"}	{"Non Zostera"}
1977153	Relative importance of phytoplankton and periphyton on oyster-culture pens in a eutrophic tropical lagoon	2005	{"Hung, JJ","Lin, HJ","Su, HM","Wang, TC"}	{"Non Zostera"}
1976897	Contamination of Caribbean coastal waters by the antifouling herbicide Irgarol 1051	2006	{"Carbery, Kelly","Frickers, Trish","Otero, Ernesto","Owen, Richard","Readman, James"}	{"Non Zostera"}
1977224	Numerical study on nutrient cycles in Akkeshi Lake focused on the role of benthos	2004	{Anonymous}	{"Non Seagrass"}
1978155	Aspects of penaeid biology and ecology of relevance to aquaculture: a review	1998	{"Rothlisberg, PC"}	{"Non Seagrass"}
1974849	Ontogeny of Labridae family in shore ecosystems in Seaflower Biosphere Reserve, Colombian Caribbean.	2014	{"Ariza Pacheco, Daniel Alejandro","Santos-Martinez, Adriana"}	{"Non Zostera"}
1978909	COMPARISON OF THE SEAGRASS THALASSIA-TESTUDINUM AND ITS EPIPHYTES IN THE FIELD AND IN LABORATORY TESTS SYSTEMS	1990	{"CLARK J R","MACAULEY J M"}	{"Non Zostera"}
1975629	Fishery biology, demography of three spotted seahorse, Hippocampus trimaculatus inhabiting Gulf of Mannar region, Southeast coast of India.	2011	{"Balasubramanian, T.","Dhanya, S.","Murugan, A.","Naganathan, V.","Rajagopal, S.","Sarcar, A. B."}	{"Non Seagrass","Coastal Habitat"}
1978023	Water quality and eutrophication in Tampa Bay, Florida	1999	{"Martin, J","Morrison, G","Wang, PF"}	{"Non Seagrass"}
1976471	Habitat variability in young-of-the-year winter flounder, Pseudopleuronectes americanus, in Maine estuaries	2008	{"Lazzari, Mark A."}	{"No Stressor/Restoration"}
1975740	Recent Brachiopoda of the Marine Protected Area "Secche di Tor Paterno", Central Tyrrhenian Sea	2011	{"Albano, Paolo G.","Evangelisti, Francesca","Sabelli, Bruno"}	{"Non Seagrass"}
1978373	A metabolism-based trophic index for comparing the ecological values of shallow-water sediment habitats	1996	{"Berry, BE","Christian, RR","Dailey, SK","Lackey, GJ","Rizzo, WM","Wetzel, RL"}	{"Non Zostera"}
1975436	Spatial and temporal variations of epiphytic Ostreopsis siamensis on Posidonia oceanica (L.) Delile leaves in Mahdia (Tunisia)	2012	{"Bradai, Mohamed-Najmeddine","Hamza, Asma","Mabrouk, Lotfi","Mahfoudi, Mabrouka"}	{"Non Zostera"}
1975370	Solar Radiation and Tidal Exposure as Environmental Drivers of Enhalus acoroides Dominated Seagrass Meadows	2012	{"Chartrand, Kathryn M.","Rasheed, Michael A.","Roelofs, Anthony J.","Unsworth, Richard K. F."}	{"Non Zostera"}
1973855	Evaluation of Flavonoids from Zostera asiatica as Antioxidants and Nitric Oxide Inhibitors	2016	{"Hong, Joo Wan","Jeong, Huijeong","Ju, Eunshin","Kim, Hojun","Kong, Chang-Suk","Seo, Youngwan"}	{"No Stressor/Restoration"}
1978473	SEAGRASS BIODIVERSITY IN THE INDIAN-RIVER LAGOON	1995	{"DAWES, CJ","HANISAK, D","KENWORTHY, WJ"}	{"No Stressor/Restoration","No Restoration Mentioned"}
1978374	A comparative analysis of eutrophication patterns in a temperate coastal lagoon	1996	{"Boynton, WR","Hagy, JD","Kemp, WM","Murray, L","Stokes, C"}	{"Non Zostera"}
1977484	Variations at different spatial scales of Posidonia oceanica (L.) Delilebeds; effects on the physico-chemical parameters of the sediment	2003	{"Bouquegneau, JM","Gobert, S","Kyramarios, M","Lepoint, G","Pergent-Martini, C"}	{"Non Zostera"}
1977019	Dynamics of lagoon ecosystems	2006	{"AntunesDoCarmo, JS","BE Brebbia, CA","Cannata, G.","Cioffi, F."}	{"No Stressor/Restoration"}
1974344	Respiration rates of the fan mussel Pinna nobilis at different temperatures	2015	{"Rafael Garcia-March, Jose","Tena, Jose","Torres, Javier","Trigos, Sergio","Vicente, Nardo"}	{"Non Seagrass"}
1975159	Assessment of the abundance and distribution of burrowing sandprawns and mudprawns (Callichirus and Upogebia species) in Langebaan Lagoon, South Africa	2013	{"Branch, G. M.","Nel, P."}	{"Non Seagrass"}
1973162	Interactive effect of temperature, acidification and ammonium enrichment on the seagrass Cymodocea nodosa	2018	{"Brun, F. G.","Egea, L. G.","Hernandez, I","Jimenez-Ramos, R.","Vergara, J. J."}	{"Non Zostera"}
1976298	Seed nutrient content and nutritional status of Posidonia oceanica seedlings in the northwestern Mediterranean Sea	2009	{"Balestri, Elena","Gobert, Sylvie","Lardicci, Claudio","Lepoint, Gilles"}	{"Non Zostera"}
1974059	Temperature is not a limiting factor for the expansion of Halophila stipulacea throughout the Mediterranean Sea	2016	{"Alexandre, Ana","Georgiou, Dimos","Luis, Joaquim","Santos, Rui"}	{"Non Zostera","No Restoration Mentioned"}
1976864	A decade of plant species changes on a mire in the Italian Alps: Vegetation-controlled or climate-driven mechanisms?	2006	{"Bragazza, Luca"}	{"Non Seagrass"}
1972537	Perception of natural habitat changes of West African marine protected areas	2020	{"Failler, Pierre","Sadio, Oumar","Touron-Gardic, Gregoire","Traore, Marie-Suzanne"}	{"Non Zostera","Coastal Habitat"}
1972689	Occurrence of epibenthic dinoflagellates in relation to biotic substrates and to environmental factors in Southern Mediterranean (Bizerte Bay and Lagoon, Tunisia): An emphasis on the harmful Ostreopsis spp., Prorocentrum lima and Coolia monotis	2019	{"Ben Gharbia, Hela","Ben Mhamed, Abdelouahed","Gueroun, Sonia Khadija Maite","Laabir, Mohamed","M'Rabet, Charaf","Nouri, Habiba","Shili, Abdessalem","Yahia, Mohamed Nejib Daly","Yahia, Ons Kefi-Daly"}	{"Non Seagrass"}
1976491	Nutrient requirements of in vitro cultured Halophila ovalis and Posidonia coriacea: nitrogen source	2008	{"Bennett, I. J.","Wilson, J. G."}	{"Non Zostera"}
1975451	The role of the seagrass Posidonia oceanica in the cycling of trace elements	2012	{"Apostolaki, E. T.","Kalantzi, I.","Karakassis, I.","Malea, P.","Marin, A.","Sanz-Lazaro, C."}	{"Non Zostera"}
1974994	Analyzing the spectral response of submerged aquatic vegetation in a eutrophic lake, Shanghai, China	2013	{"Yuan, Lin","Zhang, Liquan","Zou, Weina"}	{"Non Seagrass"}
1978794	THE DETRITIC COMPARTMENT IN A POSIDONIA-OCEANICA MEADOW - LITTER FEATURES, DECOMPOSITION RATES, AND MINERAL STOCKS	1992	{"MATEO, MA","PERGENT, G","PERGENTMARTINI, C","REGNIER, C","ROMERO, J"}	{"Non Zostera"}
1975753	High connectivity across environmental gradients and implications for phenotypic plasticity in a marine plant	2011	{"Bricker, Eric","Calladine, Ainsley","Waycott, Michelle","Zieman, Joseph C."}	{"Non Zostera"}
1977134	Effects of waterfowl, large fish and periphyton on the spring growth of Potamogeton pectinatus L. in Lake Mogan, Turkey	2005	{"Beklioglu, M","Ince, O","Sandsten, H"}	{"Non Seagrass","Non Zostera","No Restoration Mentioned","Coastal Habitat"}
1974556	Influence of substratum on non-native clam recruitment in Willapa Bay, Washington, USA	2014	{"Freshley, N.","Herrold, S.","Patten, K.","Ruesink, J. L.","Trimble, A. C."}	{"Non Seagrass","Non Zostera","No Stressor/Restoration","No Restoration Mentioned"}
1973390	A review of bottom-up vs. top-down control of sponges on Caribbean fore-reefs: what's old, what's new, and future directions	2018	{"Loh, Tse-Lynn","McMurray, Steven E.","Pawlik, Joseph R."}	{"Non Zostera"}
1979233	ECOLOGY OF BOTANY BAY .2. ASPECTS OF THE FEEDING ECOLOGY OF THE FANBELLIED LEATHERJACKET, MONACANTHUS-CHINENSIS (PISCES, MONACANTHIDAE), IN POSIDONIA-AUSTRALIS SEAGRASS BEDS IN QUIBRAY BAY, BOTANY BAY, NEW-SOUTH-WALES	1979	{"CONACHER, MJ","LANZING, WJR","LARKUM, AWD"}	{"Non Zostera"}
1976159	STUDY OF ARTIFICIAL SEEDS OF SUBMERGED MACROPHYTE POTAMOGETON CRISPUS L.	2009	{"An Yan-Jie","Yang Shao","Zhang Yan-Hui"}	{"Non Seagrass"}
1973780	Vale Professor Arthur McComb Obituary	2017	{"Walker, Diana"}	{"Non Seagrass"}
1973087	The future of marine biodiversity and marine ecosystem functioning in UK coastal and territorial waters (including UK Overseas Territories) - with an emphasis on marine macrophyte communities	2018	{"Kamenos, Nicholas A.","Kuepper, Frithjof C."}	{"Non Seagrass"}
1973352	Structural and physiological responses of Halodule wrightii to ocean acidification	2018	{"Augusto da Silva, Camilla Reis","Barufi, Jose Bonomi","Bianchini, Adalto","Brandalise, Isabel","Calderon, Emiliano Nicolas","Castro, Clovis","Horta, Paulo Antunes","Rodrigues, Ana Claudia","Schneider, Geniane","Silva, Joao"}	{"Non Zostera"}
1976081	Characterisation of polymorphic microsatellite markers in the widespread Australian seagrass, Posidonia australis Hook. f. (Posidoniaceae), with cross-amplification in the sympatric P. sinuosa	2009	{"Anthony, J.","Barrett, M. D.","Barrett, R. L.","Cambridge, M. L.","Coupland, G. T.","Dixon, K. W.","Kendrick, G. A.","Krauss, S. L.","Sinclair, E. A.","Wallace, M. J.","Waycott, M."}	{"Non Zostera"}
1976404	Mapping seagrass species, cover and biomass in shallow waters: An assessment of satellite multi-spectral and airborne hyper-spectral imaging systems in Moreton Bay (Australia)	2008	{"Anstee, Janet","Brando, Vittoro","Dekker, Arnold","Phinn, Stuart","Roelfsema, Chris"}	{"No Stressor/Restoration"}
1973531	A first record of Halodule pinifolia Miki den Hartog, and new locality of nationally endangered Halophila beccarii Asch, from the eastern coast of Sri Lanka	2017	{"Bown, Rosalind","Fernando, Daniel","Perera, Nishan","Tanna, Akshay","Udagedara, Susantha"}	{"Non Zostera"}
1974842	Development of a 'sediment-stress' functional-level indicator for the seagrass Halophila ovalis	2014	{"Forbes, Vanessa","Holmer, Marianne","Kilminster, Kieryn"}	{"Non Zostera"}
1973436	Carbon sequestration index as a determinant for climate change mitigation: Case study of Bintan Island	2018	{"Abimanyu, Haznan",Afdal,"BE Mukti, MM","Dharmawan, I. W. E.","Irawan, Andri","Meirinawati, Hanny","Prayudha, Bayu","Setiadi, B","Surinati, Dewi","Syukri, Agus F.","Wahyudi, A'an J.","Yuliana, Chitra I.","Yuniati, MD","Yuniati, Putri I."}	{"Non Seagrass","No Restoration Mentioned"}
1973998	The contribution of denitrification and burial to the nitrogen budgets of three geomorphically distinct Australian estuaries: Importance of seagrass habitats	2016	{"Eyre, Bradley D.","Maher, Damien T.","Sanders, Christian"}	{"No Stressor/Restoration"}
1972973	Ontogenetic patterns in resource use dynamics of bonefish (Albula vulpes) in the Bahamas	2019	{"Cooke, Steven J.","Danylchuk, Andy J.","Haak, Christopher R.","Murchie, Karen J.","Power, Michael","Shipley, Oliver N."}	{"Non Seagrass","No Restoration Mentioned"}
1972513	A System Level Analysis of Coastal Ecosystem Responses to Hurricane Impacts	2020	{"Armitage, A. R.","Carvallo, F.","Congdon, V. M.","Dunton, K. H.","Fisher, M.","Hardison, A. K.","Hogan, J. D.","Hosen, J.","Hu, X.","Kinard, S.","Kominoski, J. S.","Lin, X.","Liu, Z.","Montagna, P. A.","Patrick, C. J.","Pennings, S. C.","Reese, B. Kiel","Walker, L.","Weaver, C. A.","Wetz, M.","Yeager, L."}	{"Non Seagrass"}
1977393	Resource utilization patterns of epifauna from mangrove forests with contrasting inputs of local versus imported organic matter	2004	{"Bouillon, S","Dehairs, F","Koedam, N","Moens, T","Overmeer, I"}	{"Non Seagrass"}
1975340	Near-Real-Time Acoustic Monitoring of Beaked Whales and Other Cetaceans Using a Seaglider (TM)	2012	{"Baird, Robin W.","Bogue, Neil M.","Jump, William A.","Klinck, Holger","Klinck, Karolin","Litchendorf, Trina","Luby, James C.","Mellinger, David K.","Schorr, Gregory S.","Shilling, Geoffrey B.","Wood, Angela S."}	{"Non Seagrass"}
1974622	Can submerged macrophytes be effective for controlling waterborne phytopathogens in irrigation ponds? An experimental approach using microcosms	2014	{"Antonia Elorrieta, M.","Bonachela, Santiago","Fenoy, Encarnacion","Fuentes-Rodriguez, Francisca","Gallego, Irene","Jesus Casas, J.","Juan, Melchor"}	{"Non Zostera"}
1978613	THE INFLUENCE OF AMMONIA ON THE GROWTH AND PHOTOSYNTHESIS OF RUPPIA-DREPANENSIS TINEO FROM DONANA-NATIONAL-PARK (SW SPAIN)	1994	{"DIAS, C","HOOTSMANS, MJM","SANTAMARIA, L"}	{"Non Zostera"}
1974383	Trophic transfer in seagrass systems: estimating seasonal production of an abundant seagrass fish, Bairdiella chrysoura, in lower Chesapeake Bay	2015	{"Latour, Robert J.","Sobocinski, Kathryn L."}	{"Non Seagrass","Coastal Habitat"}
1979246	DIGESTIBILITY TRIALS AND PRACTICAL USE OF DEHYDRATED RUPPIA MEAL	1979	{"FINZI, A","GIACCONE, P","LETO, G"}	{"Non Zostera"}
1977855	Magnitude of within-patch variation in seagrass Halophila ovalis growth affected by adjacent Thalassia hemprichii vegetation	2000	{"Iizumi, H","Nakaoka, M"}	{"Non Zostera"}
1972831	Extensive Thioautotrophic Gill Endosymbiont Diversity within a Single Ctena orbiculata (Bivalvia: Lucinidae) Population and Implications for Defining Host-Symbiont Specificity and Species Recognition	2019	{"Alexander, Louie","Anderson, Laurie C.","Campbell, Barbara J.","Engel, Annette Summers","Lim, Shen Jean","Paterson, Audrey T."}	{"Non Seagrass"}
1978090	Epiphytic patterns of macroalgal assemblages on Cystoseira species (Fucales, Phaeophyta) in the east coast of Attica (Aegean Sea, Greece)	1999	{"Belegratis, MR","Bitis, I","Economou-Amilli, A","Ott, JA"}	{"Non Seagrass","No Stressor/Restoration"}
1979136	LIFE-HISTORY OF THE STICHAEID FISH OPISTHOCENTRUS-OCELLATUS	1982	{"SHIOGAKI, M"}	{"Non Seagrass"}
1974873	Incorporating Climate and Ocean Change into Extinction Risk Assessments for 82 Coral Species	2013	{"Birkeland, Charles","Brainard, Russell E.","Dunlap, Matthew J.","Eakin, C. Mark","Mcelhany, Paul","Miller, Margaret W.","Patterson, Matt","Piniak, Gregory A.","Weijerman, Mariska"}	{"Non Seagrass","Coastal Habitat"}
1975322	Influence of near-bottom re-suspended sediment on benthic light availability	2012	{"Gallegos, Charles L.","Nielsen, Soren Laurentius","Pedersen, Troels Moller"}	{"Non Seagrass"}
1974425	Using stable isotopes to discern mechanisms of connectivity in estuarine detritus-based food webs	2015	{"Howe, Emily R.","Simenstad, Charles A."}	{"No Stressor/Restoration"}
1977277	Changes in wild fish assemblages after the establishment of a fish farming zone in an oligotrophic marine ecosystem	2004	{"Karakassis, I","Labropoulou, M","Machias, A","Papaconstantinou, C","Papadopoulou, KN","Somarakis, S"}	{"Non Seagrass"}
1973366	Production of indoleacetic acid by strains of the epiphytic bacteria Neptunomonas spp. isolated from the red alga Pyropia yezoensis and the seagrass Zostera marina	2018	{"Handayani, Midia Lestari","Matsuda, Ryuya","Sasaki, Hiroyuki","Takano, Hiroyoshi","Takechi, Katsuaki","Takio, Susumu"}	{"Non Seagrass"}
1977059	The influence of marine cages on the sediment chemistry in the Western Mediterranean Sea	2005	{"Finoia, MG","Manzueto, L","Mercatali, I","Persia, E","Porrello, S","Stipa, P","Tomassetti, P"}	{"Non Seagrass"}
1972567	Genome-Wide Analysis of the Cryptochrome Gene Family in Plants	2020	{"Aslam, Mohammad","Cao, Guangqiu","Cao, Shijiang","Cheng, Han","He, Sijia","Hu, Anqi","Lv, Hongwei","Qin, Yuan","Yu, Yuan","Zhang, Jiashuo","Zhang, Xingtan"}	{"No Restoration Mentioned"}
1973618	Molecular Mechanisms behind the Physiological Resistance to Intense Transient Warming in an Iconic Marine Plant	2017	{"Dattolo, Emanuela","Entrambasaguas, Laura","Marin-Guirao, Lazaro","Procaccini, Gabriele","Ruiz, Juan M."}	{"Non Zostera"}
1978968	ASPECTS OF PRODUCTION AND BIOMASS OF 4 SEAGRASS SPECIES (CYMODOCEOIDEAE) FROM PAPUA-NEW-GUINEA	1987	{"BROUNS, JJWM"}	{"Non Zostera"}
1977748	Seasonal acclimation in the photosynthetic and respiratory temperature responses of three submerged freshwater macrophyte species	2001	{"Pilon, J","Santamaria, L"}	{"Non Seagrass"}
1975170	Green turtle herbivory dominates the fate of seagrass primary production in the Lakshadweep islands (Indian Ocean)	2013	{"Alcoverro, Teresa","Arthur, Rohan","Kelkar, Nachiket","Marba, Nuria"}	{"Non Zostera"}
1972867	Structural Changes of Seagrass Seascapes Driven by Natural and Anthropogenic Factors: A Multidisciplinary Approach	2019	{"Abadie, Arnaud","Gobert, Sylvie","Leduc, Michele","Lejeune, Pierre","Richir, Jonathan"}	{"Non Zostera"}
1975243	Exploring the effects of spatial closures in a temperate marine ecosystem in Western Australia: A case study of the western rock lobster (Panulirus cygnus) fishery	2012	{"Babcock, Russ","Loneragan, Neil R.","Lozano-Montes, Hector M."}	{"Non Seagrass"}
1972788	Decadal Monitoring in Bermuda Shows a Widespread Loss of Seagrasses Attributable to Overgrazing by the Green Sea Turtle Chelonia mydas	2019	{"Coates, Kathryn A.","Fourqurean, James W.","Kenworthy, W. Judson","Manuel, Sarah A.","Massey, Simieon C."}	{"Non Zostera"}
1974498	Characterization of a Subtropical Hawksbill Sea Turtle (Eretmocheyles imbricata) Assemblage Utilizing Shallow Water Natural and Artificial Habitats in the Florida Keys	2014	{"Bagley, Dean A.","Bresette, Michael J.","Clark, David R.","Gorham, Jonathan C.","Keske, Carrie L.","Nairn, Campbell J.","Shamblin, Brian M.","Traxler, Steve L.","Witherington, Blair E."}	{"Non Zostera"}
1976493	Coastal wetlands: function and role in reducing impact of land-based management	2008	{"BE Fares, A","Bruland, G. L.","ElKadi, AI"}	{"Non Seagrass"}
1978751	INFLUENCE OF THE SUBMERSED PLANT, POTAMOGETON-PERFOLIATUS, ON NITROGEN CYCLING IN ESTUARINE SEDIMENTS	1992	{"CAFFREY, JM","KEMP, WM"}	{"Non Seagrass"}
1975490	Enhancement of sediment suspension and nutrient flux by benthic macrophytes at low biomass	2012	{"Lawson, S. E.","McGlathery, K. J.","Wiberg, P. L."}	{"Non Seagrass"}
1973083	A standard, analytical protocol for the quantitation of non-structural carbohydrates in seagrasses that permits inter-laboratory comparison	2018	{"Campbell, Marnie L.","Duke, Emily","Manley-Harris, Merilyn","Sorensen, Stine T."}	{"Non Zostera"}
1978384	Is total primary production in shallow coastal marine waters stimulated by nitrogen loading?	1996	{"Borum, J","SandJensen, K"}	{"Non Zostera"}
1972740	Stable isotopes infer the value of Australia's coastal vegetated ecosystems from fisheries	2020	{"Carnell, Paul E.","Ierodioconou, Daniel","Janes, Holger","Macreadie, Peter I.","Nicholson, Emily","Reeves, Simon","Taylor, Matthew D."}	{"Non Seagrass"}
1972847	BRIDGING THE RESEARCH-IMPLEMENTATION GAP IN CONSERVATION PALEOBIOLOGY: LESSONS LEARNED FROM THE SEACAR (STATEWIDE ECO-SYSTEM ASSESSMENT OF COASTAL AND AQUATIC RESOURCES) PROJECT	2019	{"Clark, Cheryl","Dietl, Gregory","Durham, Stephen","Prado, Rebecca"}	{"No Stressor/Restoration"}
1974633	Temperature extremes reduce seagrass growth and induce mortality	2014	{"Collier, C. J.","Waycott, M."}	{"Non Zostera"}
1974392	Evidence of sewage-driven eutrophication and harmful algal blooms in Florida's Indian River Lagoon	2015	{"Debortoli, David D.","Herren, Laura W.","Lapointe, Brian E.","Vogel, Margaret A."}	{"Non Seagrass"}
1975743	Timing and habitat preferences for settlement of juvenile fishes in the Marine Protected Area of Torre Guaceto (south-eastern Italy, Adriatic Sea)	2011	{"Bussotti, Simona","Guidetti, Paolo"}	{"Non Seagrass"}
1973871	The Seagrass Effect Turned Upside Down Changes the Prospective of Sea Urchin Survival and Landscape Implications	2016	{"Ceccherelli, Giulia","Farina, Simone","Guala, Ivan","Oliva, Silvia","Piazzi, Luigi","da Silva, Rodrigo Pires"}	{"Non Seagrass"}
1977552	Desulfovibrio hydrothermalis sp nov., a novel sulfate-reducing bacterium isolated from hydrothermal vents	2003	{"Alazard, D","Bouabida, N","Dukan, S","Garcia, JL","Morel, F","Ollivier, B","Thomas, P","Urios, A","Verhe, F"}	{"Non Seagrass"}
1973295	Importance of seagrass-mangrove continuum as feeding grounds for juvenile pink ear emperor Lethrinus lentjan in Setiu Lagoon, Malaysia: Stable isotope approach	2018	{"Dung Quang Le","Hii, Yii Siang","Nanjo, Kusuto","Sano, Yuji","Shirai, Kotaro","Tanaka, Kentaro"}	{"No Stressor/Restoration"}
1973915	Fertilization Changes Seagrass Community Structure but not Blue Carbon Storage: Results from a 30-Year Field Experiment	2016	{"Fourqurean, James W.","Howard, Jason L.","Lopes, Christian C.","Perez, Alex"}	{"Non Zostera","No Restoration Mentioned"}
1978250	Short-term effects of nutrient enrichment of the sediment and interactions between the seagrass Cymodocea nodosa and the introduced green alga Caulerpa taxifolia in a Mediterranean bay	1997	{"Ceccherelli, G","Cinelli, F"}	{"Non Zostera"}
1972902	HOW TO SURVIVE A SEAWEED PLAGUE	2019	{"Zanolli, Lauren"}	{"Non Seagrass","Coastal Habitat"}
1977096	The effect of ulvoid macroalgae on the inorganic carbon utilization by an intertidal seagrass Thalassia hemprichii	2005	{"Dy, DT","Fu, CC","Liu, SL","Wang, WL"}	{"Non Zostera","Coastal Habitat"}
1976553	Effects of management strategies on the landscape ecology of a Marine Protected Area	2008	{"Rioja-Nieto, Rodolfo","Sheppard, Charles"}	{"Non Seagrass","Coastal Habitat"}
1975700	Temporal variations in morphology and biomass of vulnerable Halodule wrightii meadows at their southernmost distribution limit in the southwestern Atlantic	2011	{"Fournier, Jerome","Gern, Fabiana","Lana, Paulo da Cunha","Panizza, Andrea de Castro","Sordo, Laura","de Oliveira, Veronica M."}	{"Non Zostera","No Restoration Mentioned"}
1975748	Benthic Macrophyte Distribution and Abundance in Estuarine Mangrove Lakes and Estuaries: Relationships to Environmental Variables	2011	{"Fourqurean, James Warren","Frankovich, Thomas Anthony","Morrison, Douglas"}	{"Non Zostera"}
1972938	The distribution of large floating seagrass (Zostera marina) aggregations in northern temperate zones of Bohai Bay in the Bohai Sea, China	2019	{"Hai-Peng, Zhang","Min, Xu","Xiao-Jing, Song","Yi, Zhou","Yun-Ling, Zhang"}	{"No Stressor/Restoration"}
1975733	The Effect of Temperature on Infradian Rhythms of Reproduction in Ulva fenestrata Postels et Ruprecht, 1840 (Chlorophyta: Ulvales)	2011	{"Kalita, T. L.","Titlyanov, E. A."}	{"Non Seagrass"}
1975767	Effects of a small-bladed macroalgal canopy on benthic boundary layer dynamics: implications for nutrient transport	2011	{"Cornelisen, Christopher D.","Hurd, Catriona L.","Kregting, Louise T.","Pilditch, Conrad A.","Stevens, Craig L."}	{"Non Seagrass","Non Zostera"}
1976953	Bacterial carbon sources in coastal sediments: a cross-system analysis based on stable isotope data of biomarkers	2006	{"Boschker, H. T. S.","Bouillon, S."}	{"No Stressor/Restoration"}
1977887	Water flow across and sediment trapping in submerged macrophyte beds of contrasting growth form	2000	{"Roos, PJ","Santamaria, L","Vermaat, JE"}	{"Non Seagrass"}
1973188	Substantial changes in the depth distributions of benthic invertebrates in the eastern Kattegat since the 1880s	2018	{"Blomqvist, Mats","Josefson, Alf B.","Loo, Lars-Ove","Rolandsson, Johan"}	{"Non Seagrass"}
1973852	How old are you? Genet age estimates in a clonal animal	2016	{"Baums, I. B.","Devlin-Durante, M. K.","Miller, M. W.","Precht, W. F."}	{"Non Seagrass","Non Zostera","No Stressor/Restoration","No Restoration Mentioned","Coastal Habitat"}
1973089	Spatial and temporal patterns of seed dispersal in eelgrass Zostera marina: A case study in Moon Lake, Shandong, China	2018	{"Li, Chang-Jun","Li, Wen-Tao","Li, Yong","Ma, Rui","Zhang, Peidong","Zhang, Xiumei"}	{"No Stressor/Restoration"}
1973881	Utilization of carbon substrates by heterotrophic bacteria through vertical sediment profiles in coastal and estuarine seagrass meadows	2016	{"Lavery, Paul S.","Rozaimi, Mohammad","Sawstrom, Christin","Serrano, Oscar"}	{"Non Zostera","No Restoration Mentioned"}
1975588	Vivipary in the cactus family: A reply to Ortega-Baes' et al. evaluation of 25 species from northwestern Argentina	2011	{"Abreu, D. D.","Cota-Sanchez, J. H.","Reyes-Olivas, A."}	{"Non Seagrass"}
1978492	ARSENIC BIOACCUMULATION AND TOXICITY IN AQUATIC MACROPHYTES EXPOSED TO GOLD-MINE EFFLUENT - RELATIONSHIPS WITH ENVIRONMENTAL PARTITIONING, METAL UPTAKE AND NUTRIENTS	1995	{"BRIGHT, DA","DUSHENKO, WT","REIMER, KJ"}	{"Non Seagrass"}
1974190	Photochemical efficiency of Thalassia testudinum varies in response to repeated shading events and unpredictable weather	2015	{"Durako, Michael J.","Genazzio, Melissa A."}	{"Non Zostera"}
1979282	PRODUCTION ECOLOGY AND PHYSIOLOGY OF SEAGRASSES	1977	{"MCCOY C P","MCMILLAN C"}	{"No Stressor/Restoration"}
1975108	Influence of microhabitat on seedling survival and growth of the Mediterranean seagrass Posidonia oceanica (L.) Delile	2013	{"Alagna, Adriana","Badalamenti, Fabio","Terlizzi, Antonio","Vega Fernandez, Tomas"}	{"Non Zostera"}
1975262	Cymodocea nodosa vs. Caulerpa prolifera: Causes and consequences of a long term history of interaction in macrophyte meadows in the Mar Menor coastal lagoon (Spain, southwestern Mediterranean)	2012	{"Bernal, Carmen M.","Freitas, Rosa","Garcia-Sanchez, Marta","Marcos, Concepcion","Perez-Ruzafa, Angel","Perez-Ruzafa, Isabel M.","Quintino, Victor","Rodrigues, Ana Maria"}	{"Non Zostera"}
1973292	Direct and Indirect Interactions Between Lower Estuarine Mangrove and Saltmarsh Habitats and a Commercially Important Penaeid Shrimp	2018	{"Becker, Alistair","Gaston, Troy F.","Moltschaniwskyj, Natalie A.","Taylor, Matthew D."}	{"Non Seagrass"}
1976717	Cloning of two SOS1 transporters from the seagrass Cymodocea nodosa. SOS1 transporters from Cymodocea and Arabidopsis mediate potassium uptake in bacteria	2007	{"Benito, Begona","Garciadeblas, Blanca","Haro, Rosario"}	{"Non Zostera"}
1977790	Hydrodynamics as a major factor controlling the occurrence of green macroalgal blooms in a eutrophic estuary: A case study on the influence of precipitation and river management	2001	{"Flindt, MR","Lillebo, AI","Marques, JC","Martins, I","Pardal, MA"}	{"Non Seagrass"}
1977412	Effects of disturbances caused by coastal constructions on spatial structure, growth dynamics and photosynthesis of the seagrass Posidonia oceanica	2003	{"Romero, J","Ruiz, JM"}	{"Non Zostera"}
1972561	Role of vegetated coastal ecosystems as nitrogen and phosphorous filters and sinks in the coasts of Saudi Arabia	2020	{"Almahasheer, H.","Cusack, M.","Duarte, C. M.","Krishnakumar, P. K.","Qurban, M. A.","Rabaoui, L.","Saderne, V.","Serrano, O."}	{"Coastal Habitat"}
1977389	Impact of Pestarella tyrrhena on benthic metabolism in sediment microcosms enriched with seagrass and macroalgal detritus	2004	{"Kristensen, E","Papaspyrou, S","Thessalou-Legaki, M"}	{"Non Seagrass"}
1978367	Effect of temperature on the installation and growth of annuals in Mediterranean temporary marshes	1996	{"Bonis, A","Laloe, F","Lepart, J"}	{"Non Seagrass"}
1978961	VARIABILITY IN THE CHEMISTRY OF ESTUARINE PLANTS AND ITS EFFECT ON FEEDING BY CANADA GEESE	1987	{"BUCHSBAUM, R","VALIELA, I"}	{"No Stressor/Restoration"}
1976839	Identification of trophic interactions within an estuarine food web (northern New Zealand) using fatty acid biomarkers and stable isotopes	2006	{"Alfaro, Andrea C.","Duxbury, Mark","Sergent, Luce","Thomas, Francois"}	{"Non Zostera","No Stressor/Restoration"}
1972776	Evidence of the occurrence of a large dugong in the Red Sea, Egypt	2019	{"Shawky, Ahmed M."}	{"Non Seagrass"}
1978291	Habitat linkages: The effect of intertidal saltmarshes and adjacent subtidal habitats on abundance, movement, and growth of an estuarine fish	1997	{"Crawford, MK","Irlandi, EA"}	{"No Stressor/Restoration"}
1977909	Colony formation and fatty acid composition of marine labyrinthulid isolates grown on agar media	2000	{"Fujisawa, T","Sakata, T","Yoshikawa, T"}	{"Non Seagrass"}
1975417	Invertebrate communities associated with blue mussel beds in a patchy environment: a landscape ecology approach	2012	{"Koivisto, Maria","Westerbom, Mats"}	{"Non Seagrass"}
1977248	Periphyton indicate effects of wastewater discharge in the near-coastal zone, Perth (Western Australia)	2004	{"Cosgrove, J","Hillman, K","Morrison, P","Walker, D"}	{"Non Seagrass","Coastal Habitat"}
1975738	How small-scale variation in oyster reef patchiness influences predation on bivalves	2011	{"Geraldi, Nathan R.","Macreadie, Peter I.","Peterson, Charles H."}	{"Non Seagrass"}
1975817	Comparative management of offshore posidonia residues: Composting vs. energy recovery	2011	{"Cocozza, Claudio","Miano, Teodoro","Mininni, Carlo","Parente, Angelo","Santamaria, Pietro","Zaccone, Claudio"}	{"Non Zostera"}
1975211	Water Quality Control Concept in Seto Inland Sea	2013	{"BE Ozhan, E","Ishizuka, Masahide","Kii, Masanobu"}	{"Non Seagrass"}
1972841	Anthropogenic versus fish-derived nutrient effects on seagrass community structure and function (vol 99, pg 1792, 2018)	2019	{"Allgeier, J. E.","Appaldo, R.","Hensel, E.","Layman, C. A.","Montana, C. G.","Rosemond, A. D."}	{"Non Zostera"}
1975690	New Aerial Survey and Hierarchical Model to Estimate Manatee Abundance	2011	{"Dorazio, Robert M.","Doyle, Terry J.","Langtimm, Catherine A.","Stith, Bradley M."}	{"Non Seagrass"}
1979029	BRAIN-STEM EVOKED-POTENTIALS AND NOISE EFFECTS IN SEAGULLS	1985	{"COUNTER, SA"}	{"Non Seagrass"}
1976421	Benthic input rates predict seagrass (Posidonia oceanica) fish farm-induced decline	2008	{"Alvarez, Elvira","Argyrou, Marina","Danovaro, Roberto","Diaz-Almela, Elena","Duarte, Carlos Manuel","Grau, Antoni","Holmer, Marianne","Karakassis, Ioannis","Marba, Nuria","Mirto, Simone","Petrou, Anthony","Santiago, Rocio"}	{"Non Zostera"}
1975831	Elevated whole brain arginine vasotocin with Aroclor 1254 exposure in two Syngnathus pipefishes	2010	{"Foran, Christy M.","Ripley, Jennifer L."}	{"Non Seagrass"}
1973125	Carbon stocks and accumulation rates in Red Sea seagrass meadows	2018	{"Almahasheer, Hanan","Duarte, Carlos M.","Irigoien, Xabier","Serrano, Oscar"}	{"Non Zostera"}
1975705	Negative effects of stress-resistant drift algae and high temperature on a small ephemeral seagrass species	2011	{"Holmer, Marianne","Thomsen, Mads S.","Wirachwong, Pornthep"}	{"Non Zostera"}
1975226	Tide- and rainfall-induced variations of physical and chemical parameters in a mangrove-depleted estuary of East Hainan (South China Sea)	2012	{"Herbeck, Lucia S.","Krumme, Uwe","Wang, Tianci"}	{"Non Seagrass"}
1975848	Influence of submerged vegetation and fish abundance on water clarity in peri-urban eutrophic ponds	2010	{"De Backer, Sylvia","Triest, Ludwig","Van Onsem, Stijn"}	{"Non Seagrass"}
1973016	Characterization of the Mycobiome of the Seagrass, Zostera marina, Reveals Putative Associations With Marine Chytrids.	2019	{"Eisen, Jonathan A","Ettinger, Cassandra L"}	{"No Stressor/Restoration"}
1978546	WINTER BIOMASS AND NUTRIENT VALUES OF 3 SEAGRASS SPECIES AS POTENTIAL FOODS FOR REDHEADS (AYTHYA-AMERICANA EYTON) IN CHANDELEUR SOUND, LOUISIANA	1994	{"CHADWICK, PC","MICHOT, TC"}	{"Non Zostera","No Restoration Mentioned"}
1974885	Flowering of the seagrass Posidonia oceanica in the NW Mediterranean: is there a link with solar activity?	2013	{"Bianchi, C. N.","Giovannetti, E.","Montefalcone, M.","Morri, C.","Peirano, A."}	{"No Restoration Mentioned"}
1978660	THE ANTIFOULING ACTIVITY OF NATURAL AND SYNTHETIC PHENOLIC-ACID SULFATE ESTERS	1993	{"ALBERTE, RS","CREWS, P","TODD, JS","ZIMMERMAN, RC"}	{"No Restoration Mentioned"}
1976974	Potential role of sponge communities in controlling phytoplankton blooms in Florida Bay	2006	{"Chester, Charles M.","Fourqurean, James W.","Jochem, Frank J.","Peterson, Bradley J."}	{"Non Seagrass"}
1973886	Remotely sensing the German Wadden Sea-a new approach to address national and international environmental legislation	2016	{"Adolph, Winny","Eskildsen, Kai","Gade, Martin","Geissler, Jasmin","Kemme, Linnea","Kohlus, Joern","Melchionna, Sabrina","Millat, Gerald","Mueller, Gabriele","Reimers, Hans-Christian","Smollich, Susan","Stelzer, Kerstin"}	{"Non Seagrass","No Stressor/Restoration"}
1975032	Are mangroves in arid environments isolated systems? Life-history and evidence of dietary contribution from inwelling in a mangrove-resident shrimp species	2013	{"Al-Maslamani, I.","Al-Mohannadi, M.","Kennedy, H. A.","Le Vay, L.","Walton, M. E. M."}	{"Non Seagrass"}
1974390	Evidences of adaptive traits to rocky substrates undermine paradigm of habitat preference of the Mediterranean seagrass Posidonia oceanica	2015	{"Alagna, Adriana","Badalamenti, Fabio","Fici, Silvio"}	{"Non Zostera"}
1975754	Ecological roles of the parasitic phytomyxids (plasmodiophorids) in marine ecosystems - a review	2011	{"Gleason, Frank H.","Kirchmair, Martin","Neuhauser, Sigrid"}	{"Non Seagrass"}
1977745	Ultraviolet-induced responses in two species of climax tropical marine macrophytes	2001	{"Armstrong, RA","Connelly, XM","Detres, Y"}	{"Non Zostera","No Restoration Mentioned"}
1974125	Demographics of a nearshore mating queen conch (Lobatus gigas) aggregation on the southeast Florida Reef Tract	2016	{"Berry, Charlotte","Hill, Ronald L.","Walker, Brian K."}	{"Non Seagrass"}
1978657	DIATOMS ON HERBARIUM MACROPHYTES AS INDICATORS FOR WATER-QUALITY	1993	{"MERTENS, A","VANDAM, H"}	{"Non Zostera"}
1974118	Ecological Importance of Benthic Microalgae in the Intertidal Mud Flat of Yeongheung Island; Application of Stable Isotope Analysis (SIA)	2016	{"Bohyung, Choi","Shin, Kyunghoon",Í∞ïÏàòÏßÑ,ÌïúÏö©ÏßÑ}	{"Non Zostera"}
1976741	Community metabolism in temperate maerl beds. I. Carbon and carbonate fluxes	2007	{"Chauvaud, Laurent","Clavier, Jacques","Martin, Sophie","Thouzeau, Gerard"}	{"Non Seagrass"}
1974126	POPULATION STRUCTURE AND LIFE HISTORY OF NEOMYSIS NIGRA NAKAZAWA, 1910 (MYSIDA) ON JEJU ISLAND, SOUTH KOREA	2016	{"Bae, Jae-Yong","Noh, Gyeong Eon","Park, Won-Gyu"}	{"Non Seagrass"}
1976632	Spatial scale and the detection of impacts on the seagrass Posidonia australis following pier construction in an embayment in southeastern Australia	2007	{"Davis, A. R.","Fyfe, S. K."}	{"Non Zostera"}
1977171	Occurrence of sulfated galactans in marine angiosperms: evolutionary implications	2005	{"Andrade, LR","Aquino, RS","Landeira-Fernandez, AM","Mourao, PAS","Valente, AP"}	{"Non Zostera"}
1972639	Effects of a power plant closure on home ranges of green turtles in an urban foraging area	2020	{"Bredvik, Jessica","Eguchi, Tomoharu","Graham, Suzanne","LeRoux, Robin","Saunders, Brendan","Seminoff, Jeffrey A."}	{"Non Seagrass"}
1972483	Nutrition of the seagrass Cymodocea nodosa: Pulses of ammonium but not of phosphate are crucial to sustain the species growth	2020	{"Alexandre, Ana","Santos, Rui"}	{"Non Zostera"}
1974423	Response of a seagrass fish assemblage to improved wastewater treatment	2015	{"Bell, J. D.","Harmelin, J. G.","Harmelin-Vivien, M. L.","Letourneur, Y.","Ourgaud, M.","Ruitton, S."}	{"Non Seagrass"}
1976959	A seascape-level perspective of coral reef ecosystems	2006	{"BE Cote, IM","Harborne, Alastair R.","Mumby, Peter J.","Reynolds, JD"}	{"Non Seagrass","Coastal Habitat"}
1977209	Fish habitat utilization in a Puerto Rico coral reef ecosystem.	2005	{"Appeldoorn, Richard S.","Clark, Randy","Monaco, Mark E.","Roque, Bryant"}	{"No Stressor/Restoration"}
1972883	Distribution of the highly toxic clinging jellyfish Gonionemus sp. around the island of Martha's Vineyard, Massachusetts, USA	2019	{"Carman, Mary R.","Govindarajan, Annette F.","Grunden, David W.","Reddington, Emily"}	{"Non Seagrass"}
1973645	Carbon storage in the seagrass meadows of Gazi Bay, Kenya	2017	{"Gilpin, Linda","Githaiga, Michael N.","Huxham, Mark","Kairo, James G."}	{"Non Zostera"}
1978896	SPATIAL COMMUNITY ORGANIZATION OF FISHES IN THE TURTLEGRASS BEDS OF GRAND CUL-DE-SAC MARIN IN GUADELOUPE FRENCH WEST INDIES	1990	{"ALIAUME C","LASSERRE G","LOUIS M"}	{"Non Zostera"}
1975764	Effects of sea bass and sea bream farming (Western Mediterranean Sea) on peracarid crustacean assemblages	2011	{"Fernandez-Gonzalez, V.","Sanchez-Jerez, P."}	{"Non Seagrass"}
1976850	Stresses of eutrophic lake sediment on submersed macrophytes I. Effects of acetic acid on germination and bud growth of Elodea nuttallii and Potamogeton crispus	2006	{"Cheng Shui-Ping","He Feng","Wu Juan","Wu Zhen-Bin","Zuo Jin-Cheng"}	{"Non Seagrass"}
1976096	Sulfide intrusion in the tropical seagrasses Thalassia testudinum and Syringodium filiforme	2009	{"Holmer, Marianne","Jensen, Henning S.","Koch, Marguerite","Krause-Jensen, Dorte","Lomstein, Bente Aa.","Olesen, Birgit","Pedersen, Ole","Petersen, Malene Hedegard","Schopmeyer, Stephanie"}	{"Non Zostera"}
1974441	Hawksbill nest site selection affects hatchling survival at a rookery in Antigua, West Indies	2015	{"Reising, Megan","Salmon, Michael","Stapleton, Seth"}	{"Non Seagrass"}
1977688	Assessing habitat loss due to anthropogenic activity in the Mondego and Mira estuaries (Portugal).	2002	{"Castro, Paula","Freitas, Helena"}	{"Non Zostera"}
1976115	Epiphytic diatom communities on intertidal seaweeds from Iceland	2009	{"De Stefano, Mario","Pennesi, Chiara","Perrone, Cesira","Poulin, Michel","Romagnoli, Tiziana","Totti, Cecilia"}	{"Non Seagrass"}
1978639	LEPIDOCHRONOLOGICAL ANALYSIS IN THE MEDITERRANEAN SEAGRASS POSIDONIA-OCEANICA STATE-OF-THE-ART AND FUTURE-DEVELOPMENTS	1994	{"PERGENT, G","PERGENTMARTINI, C"}	{"Non Zostera"}
1975031	The Mangrove Nursery Paradigm Revisited: Otolith Stable Isotopes Support Nursery-to-Reef Movements by Indo-Pacific Fishes	2013	{"Huijbers, Chantal M.","Kimirei, Ismael A.","Mgaya, Yunus D.","Nagelkerken, Ivan"}	{"Non Seagrass","Coastal Habitat"}
1973443	An Experimental Evaluation of Dock Shading Impacts on Salt Marsh Vegetation in a New England Estuary	2018	{"Davis, Amanda","Ford, Kathryn H.","Logan, John M.","Voss, Steve"}	{"Non Zostera"}
1973209	Seagrass rhizosphere microenvironment alters plant-associated microbial community composition	2018	{"Brodersen, Kasper Elgetti","Kuhl, Michael","Nielsen, Daniel A.","Pernice, Mathieu","Ralph, Peter J.","Seymour, Justin","Siboni, Nachshon"}	{"No Stressor/Restoration"}
1973247	Exergy efficiency of solar energy conversion to biomass of green macroalgae Ulva (Chlorophyta) in the photobioreactor	2018	{"Chemodanov, Alexander","Golberg, Alexander","Liberzon, Alexander","Traugott, Hadar","Zollmann, Meiron"}	{"Non Seagrass","Non Zostera"}
1976060	PoCHL P expression pattern in Posidonia oceanica is related to critical light conditions	2010	{"Bitonti, M. B.","Bruno, A.","Bruno, L.","Chiappetta, A.","Giannino, D."}	{"Non Zostera"}
1978627	EFFECTS OF PULP-MILL CHLORATE ON BALTIC SEA ALGAE	1994	{"LEHTINEN, KJ","MATTSSON, J","NOTINI, M","ROSEMARIN, A"}	{"Non Seagrass"}
1974288	Modelling the role of epiphyton and water level for submerged macrophyte development with a modified submerged aquatic vegetation model in a shallow reservoir in China	2015	{"Chen, Xiaojun","Gao, Xueping","Wang, Liyi","Zhang, Chen"}	{"Non Seagrass"}
1978433	The effects of crude oil and dispersed crude oil on tropical ecosystems: Long-term seagrass, mangrove, and coral studies	1996	{"Baca, BJ","Dodge, RE","GP MARINE TECHNOL SOC","Knap, AH","Sleeter, TD","Snedaker, SC"}	{"Non Zostera"}
1975604	Resilience of an isopod population (Cyathura carinata) to multiple stress factors in a temperate estuarine system	2011	{"Bordalo, M. D.","Cardoso, P. G.","Ferreira, S. M. F.","Leston, S.","Pardal, M. A."}	{"Non Seagrass"}
1978678	EFFECTS OF SUSPENDED-SOLIDS ON THE ESTABLISHMENT AND GROWTH OF EGERIA-DENSA	1993	{"CLAYTON, JS","TANNER, CC","WELLS, RDS"}	{"Non Zostera"}
1977624	Ammonium uptake by seagrass epiphytes: Isolation of the effects of water velocity using an isotope label	2002	{"Cornelisen, CD","Thomas, FIM"}	{"Non Seagrass"}
1978999	BIOMASS, PRODUCTION AND DECOMPOSITION OF A DEEP-WATER SEAGRASS, HALOPHILA-DECIPIENS OSTENF	1986	{"FONSECA, M","JOSSELYN, M","LARSON, R","NIESEN, T"}	{"Non Zostera"}
1976014	Structure of seagrass beds (Thalassia testudinum) along a depth gradient in La Guajira, Colombian Caribbean	2010	{"Albis Salas, Margarita R.","Duque, Guillermo","Gomez-Lopez, Diana I."}	{"Non Zostera"}
1974154	Introduction: Do Protected Areas Safeguard Biodiversity?	2016	{"BE Joppa, LN","Baillie, J. E. M.","Baillie, JEM","Joppa, L.","Robinson, J. G.","Robinson, JG"}	{"Non Seagrass"}
1976487	The effects of manipulation of sedimentary iron and organic matter on sediment biogeochemistry and seagrasses in a subtropical carbonate environment	2008	{"Fourqurean, James W.","Macko, Stephen A.","Ruiz-Halpern, Sergio"}	{"Non Zostera"}
1979327	GNOTOBIOTIC CULTURE AND PHYSIOLOGICAL ECOLOGY OF MARINE NEMATODE RHABDITIS-MARINA BASTIAN	1970	{"GREENGART, A","LEE, JJ","RULLMAN, J","TIETJEN, JH","TROMPETER, J"}	{"No Stressor/Restoration"}
1977951	Measurement of photosynthetic parameters in benthic organisms in situ using a SCUBA-based fast repetition rate fluorometer	2000	{"Falkowski, PG","Gorbunov, MY","Kolber, ZS"}	{"Non Seagrass"}
1976776	Habitat associations and diet of young-of-the-year Pacific cod (Gadus macrocephalus) near Kodiak, Alaska	2007	{"Abookire, Alisa A.","Duffy-Anderson, Janet T.","Jump, Christina M."}	{"Non Seagrass"}
1977340	Occurrence and conservation of the Dugong (Sirenia : Dugongidae) in New South Wales	2004	{"Allen, S","Hodgson, A","Marsh, H"}	{"Non Seagrass"}
1976845	A synthesis of long-term research by the Florida Coastal Everglades LTER Program	2006	{"Childers, Daniel L."}	{"Non Seagrass"}
1975516	Cytotoxic Effect of Zostera asiatica on Growth of Human Cancer Cells	2012	{"Chang, Jae-Soo","Seo, Youngwan",ÍπÄÌò∏Ï§Ä,Ïù¥Ï†ïÏûÑ,Ï†ïÎ™ÖÏùÄ,ÌôçÏ£ºÏôÑ}	{"No Stressor/Restoration"}
1978369	Seagrass responses to long-term light reduction by brown tide in upper Laguna Madre, Texas: Distribution and biomass patterns	1996	{"Onuf, CP"}	{"Non Zostera","No Restoration Mentioned"}
1972757	A Spatiotemporal Analysis of Nitrogen Pollution in a Coastal Region with Mangroves of the Southern Gulf of Mexico	2019	{"Romero, Inmaculada","Romero-Lopez, Rabindranarth","Temino-Boes, Regina"}	{"Non Seagrass","Coastal Habitat"}
1975568	Plant distribution can be reflected by physiological responses to salinity of three submerged macrophytes from the Modern Yellow River Delta	2011	{"Chen, Xinsheng","Deng, Zhenmiao","Li, Feng","Li, Xu","Pan, Ying","Xie, Yonghong"}	{"Non Zostera"}
1976649	Carbon sharing through physiological integration in the threatened seagrass Halophila johnsonii	2007	{"Dean, Ronnie J., Jr.","Durako, Michael J."}	{"Non Zostera"}
1979099	SOME PECULIARITIES OF TROPHODYNAMICS AND METABOLISM IN THE IMMATURE SEA-URCHIN STRONGYLOCENTROTUS INTERMEDIUS	1983	{"AN, NT","KHOLODOV, VI","RYABUSHKO, VI"}	{"Non Seagrass"}
1974958	Soft tissue preservation in a fossil marine lizard with a bilobed tail fin	2013	{"Kaddumi, Hani F.","Lindgren, Johan","Polcyn, Michael J."}	{"Non Seagrass","Non Zostera","No Stressor/Restoration","No Restoration Mentioned"}
1978457	FLOOD AND CYCLONE RELATED LOSS, AND PARTIAL RECOVERY, OF MORE THAN 1000 KM(2) OF SEAGRASS IN HERVEY-BAY, QUEENSLAND, AUSTRALIA	1995	{"COLES, RG","LONG, WJL","PREEN, AR"}	{"Non Zostera"}
1973927	Stable isotopes in bivalves as indicators of nutrient source in coastal waters in the Bocas del Toro Archipelago, Panama	2016	{"Graniero, Lauren E.","Grossman, Ethan L.","O'Dea, Aaron"}	{"Coastal Habitat"}
1978152	Distribution of phenolic compounds in the seagrass Posidonia oceanica	1998	{"Agostini, S","Desjobert, JM","Pergent, G"}	{"Non Zostera"}
1979147	SENESCENCE IN SUBMERGED AQUATIC ANGIOSPERMS - EFFECTS OF HEAVY-METALS	1982	{"CHOUDHURI, MA","JANA, S"}	{"Non Zostera"}
1973013	Growth Dynamics of the Surfgrass, Phyllospadix Japonicus on the Southeastern Coast of Korea	2019	{"KIM, JAE HOON","Kim, Myung-Sook","Park, Jung-Im",ÍπÄÏ¢ÖÌòë}	{"Non Zostera"}
1973246	Identifying management challenges and implementation shortcomings of a new fishing refuge: Akumal reef, Mexico	2018	{"Aranda-Fragoso, Adan","Garza-Perez, Joaquin R.","Molina-Hernandez, Ana L."}	{"Non Seagrass"}
1978376	Photosynthetic production and biomass of the subtropical seagrass Halodule wrightii along an estuarine gradient	1996	{"Dunton, KH"}	{"Non Zostera"}
1974936	The response of epiphytic microbes to habitat and growth status of Potamogeton malaianus Miq. in Lake Taihu	2013	{"Cai, Xianlei","Chen, Dan","Dai, Jiangyu","Dong, Baili","Gao, Guang","Song, Yuzhi","Tang, Xiangming"}	{"Non Seagrass"}
1977102	Nutritional ecology of thalassinidean shrimps constructing burrows with debris chambers: The distribution and use of macronutrients and micronutrients	2005	{"Abed-Navandi, D","Dworschak, PC","Koller, H"}	{"Non Seagrass"}
1977539	Control of turion germination in Potamogeton crispus	2003	{"Chen, JK","Jian, YX","Li, B","Wang, JB"}	{"Non Seagrass"}
1976625	Photosynthesis drives oxygen levels in macrophyte-associated gastropod egg masses	2007	{"Podolsky, Robert D.","Woods, H. Arthur"}	{"Non Seagrass"}
1978885	FRUIT ANATOMY, SEED-GERMINATION AND SEEDLING DEVELOPMENT IN THE JAPANESE SEAGRASS PHYLLOSPADIX (ZOSTERACEAE)	1990	{"AIOI, K","IIZUMI, H","KUO, J","NILSEN, BE"}	{"Non Zostera"}
1979166	GROWTH AND RESPIRATION RATE OF JUVENILE OREASTER-RETICULATUS (L) (ECHINODERMATA, ASTEROIDEA) ON FISH AND ALGAL DIETS	1981	{"SCHEILBING, RE"}	{"Non Zostera"}
1975697	How to Get There From Here: Ecological and Economic Dynamics of Ecosystem Service Provision	2011	{"Sanchirico, James N.","Springborn, Michael"}	{"Non Seagrass"}
1977348	Factors controlling net ecosystem metabolism in US estuaries	2004	{"Caffrey, JM"}	{"Non Zostera","No Restoration Mentioned"}
1979059	EFFECTS OF PLANT-GROWTH REGULATORS ON HILL ACTIVITY OF SUBMERGED AQUATIC PLANTS DURING INDUCED SENESCENCE	1984	{"CHOUDHURI, MA","JANA, S"}	{"Non Seagrass"}
1977497	Spatial variability in Sediment Oxygen Consumption under winter conditions in a lagoonal system in New Caledonia (South Pacific)	2003	{"Boucher, G","Chauvaud, L","Clavier, J","Denis, L","Fichez, R","Grenz, C","Pringault, O"}	{"Non Seagrass"}
1972800	The Sources of Organic Matter in Seagrass Sediments and Their Contribution to Carbon Stocks in the Spermonde Islands, Indonesia	2019	{"Ati, Restu Nur Afi","Hutahaean, Andreas A.","Kusumaningtyas, Mariska A.","Rahayu, Yusmiana P.","Rixen, Tim","Salim, Hadiwijaya L.","Solihuddin, Tubagus"}	{"Non Zostera"}
1975258	FLOWERS AND INFLORESCENCES OF THE SEAGRASS POSIDONIA (POSIDONIACEAE, ALISMATALES)	2012	{"Calvo, Sebastiano","Remizowa, Margarita V.","Rudall, Paula J.","Sokoloff, Dmitry D.","Tomasello, Agostino"}	{"Non Zostera"}
1973289	Are the ghosts of nature's past haunting ecology today?	2018	{"Gaskins, Lindsay C.","He, Qiang","Hughes, Brent B.","Nifong, James","Read, Andrew","Silliman, Brian R.","Stepp, Rick","Tinker, M. Tim"}	{"Non Seagrass"}
1975202	Assessing Nitrogen Dynamics Throughout the Estuarine Landscape	2013	{"Gardner, Wayne S.","McCarthy, Mark J.","Piehler, Michael F.","Siporin, Kaylyn N.","Smyth, Ashley R.","Thompson, Suzanne P."}	{"Non Seagrass"}
1973537	Quantitative assessment of a data-limited recreational bonefish fishery using a time-series of fishing guides reports	2017	{"Adams, Aaron J.","Black, Brooke D.","Kroloff, Emily K. N.","Osborne, Jason","Rehage, Jennifer S.","Santos, Rolando O."}	{"Non Seagrass"}
1977384	Domain shifts in the aquatic vegetation of shallow urban lakes: the relative roles of low light and anoxia in the catastrophic loss of the submerged angiosperm Vallisneria americana	2004	{"Bailey, PCE","Boon, PI","Harrison, KA","Morris, K"}	{"Non Seagrass"}
1974011	Variation in macrofaunal communities of sea grass beds along a pollution gradient in Bolinao, northwestern Philippines	2016	{"Bolisay, Klenthon","Fortes, Miguel","Go, Gay Amabelle","Honda, Kentaro","Leopardas, Venus","Nakaoka, Masahiro","Pantallano, Allyn Duvin","Uy, Wilfredo"}	{"Non Zostera","No Stressor/Restoration"}
1975940	Wastewater discharge degrades coastal waters and reef communities in southern Thailand	2010	{"Carter, R. W.","Crossland, C. J.","Reopanichkul, Pasinee","Worachananant, Suchai"}	{"Non Seagrass","Non Zostera","Coastal Habitat"}
1973199	Stable Isotope (delta C-13, delta N-15,delta O-18, delta D) Composition and Nutrient Concentration of Red Sea Primary Producers	2018	{"Agusti, Susana","Almahasheer, Hanan","Anton, Andrea","Carrillo-de-Albornoz, Paloma","Delgado-Huertas, Antonio","Duarte, Carlos M.","Garcias-Bonet, Neus","Hendriks, Iris E.","Krause-Jensen, Dorte","Lopez-Sandoval, Daffne C.","Marba, Nuria"}	{"Non Zostera","No Restoration Mentioned","Coastal Habitat"}
1978317	Scaling of nutrient inputs to submersed plant communities: Temporal and spatial variations	1997	{"Murray, L","Sturgis, RB"}	{"Non Seagrass"}
1977056	Sheet for forming phanerogam growth field, has pots stuffed with phanerogam nurturing assistant material, arranged in surface of sheet material having high water permeability	NA	{"IYODA N","NAKASE K"}	{"Non Seagrass"}
1972899	Zosteric Acid, a Bioactive Component in Eelgrass Zostera marina, Reduced Collagen I Expression in a Repaired Mouse Fibroblast Scratch	2019	{"Alghunaim, Abdullah","Newby, Bi-min Zhang","Taokaew, Siriporn"}	{"No Stressor/Restoration"}
1977159	Shoot growth and nitrogen responses to simulated herbivory in Kenyan seagrasses	2005	{"Alcoverro, T","Mariani, S"}	{"Non Zostera","No Restoration Mentioned"}
1975309	Population Structure and Genetic Diversity among Eelgrass (Zostera marina) Beds and Depths in San Francisco Bay	2012	{"Boyer, Katharyn E.","Cohen, C. Sarah","Ort, Brian S.","Wyllie-Echeverria, Sandy"}	{"No Stressor/Restoration"}
1978470	THE DISTRIBUTION, BIOMASS AND PRIMARY PRODUCTION OF THE SEAGRASS HALOPHILA-OVALIS IN THE SWAN-CANNING ESTUARY, WESTERN-AUSTRALIA	1995	{"HILLMAN, K","MCCOMB, AJ","WALKER, DI"}	{"Non Zostera"}
1976178	Darkness as an ecological resource: the role of light in partitioning the nocturnal niche	2009	{"Gerrish, Getchen A.","Morin, James G.","Patrawala, Zeenat","Rivers, Trevor J."}	{"Non Seagrass"}
1973337	Carbon amendment stimulates benthic nitrogen cycling during the bioremediation of particulate aquaculture waste	2018	{"Caldwell, Gary S.","Eyre, Bradley D.","Jones, Clifford L. W.","MacTavish, Thomas","Probyn, Trevor","Robinson, Georgina","Savage, Candida","Stead, Selina M."}	{"Non Seagrass"}
1972816	The effect of Cystoseira canopy on the value of midlittoral habitats in NW Mediterranean, an emergy assessment	2019	{"Asnaghi, V.","Chiantore, M.","De La Fuente, G.","Paoli, C.","Petrillo, M.","Povero, P.","Thrush, S.","Vassallo, P."}	{"Non Seagrass"}
1975220	Sea urchin-seagrasses interactions: trophic links in a benthic ecosystem from a coastal lagoon	2012	{"Fernandez, Catherine","Ferrat, Lila","Pasqualini, Vanina","Pergent, Gerard"}	{"Non Zostera"}
1975276	Decomposing mangrove litter supports a microbial biofilm with potential nutritive value to penaeid shrimp post larvae	2012	{"Bossier, Peter","Cnudde, Clio","De Troch, Marleen","Gatune, Charles","Ruwa, Renison","Vanreusel, Ann"}	{"Non Seagrass"}
1974818	Seagrass response to burial and breakage of expanding horizontal rhizomes: implications for clone spread	2014	{"Balestri, Elena","Lardicci, Claudio"}	{"Non Zostera"}
1975784	Strong effects of herbivorous amphipods on epiphyte biomass in a temperate seagrass meadow	2011	{"Cook, Kylie","Poore, Alistair G. B.","Vanderklift, Mathew A."}	{"Non Zostera"}
1975077	A novel approach to model exposure of coastal-marine ecosystems to riverine flood plumes based on remote sensing techniques	2013	{"Alvarez-Romero, Jorge G.","Ban, Natalie C.","Brodie, Jon","Cerdeira-Estrada, Sergio","Devlin, Michelle","Kool, Johnathan","Petus, Caroline","Pressey, Robert L.","Roberts, Jason J.","Wenger, Amelia S.","da Silva, Eduardo Teixeira"}	{"Non Zostera"}
1978404	Spatial and temporal patterns of juvenile stone flounder Kareius bicoloratus growth rates during and after settlement	1996	{"Malloy, KD","Targett, TE","Yamada, H","Yamashita, Y"}	{"Non Seagrass"}
1976604	Physiological responses of Posidonia oceanica to experimental nutrient enrichment of the canopy water	2007	{"Leoni, Vanina","Pasqualini, Vanina","Pergent, Gerard","Pergent-Martini, Christine","Vela, Alexandre"}	{"Non Zostera"}
1974561	Superhydrophobic film useful e.g. for separating biofuel, comprises dopamine polymeric film layer comprising polymeric dopamine layer and silver particle fine layer coupled with thiol group	NA	{"HUANG A","LIU Q"}	{"Non Seagrass"}
1975771	Sea turtles on the Caribbean coast of Guadeloupe (French West Indies)	2011	{"Autret, Mathieu","Bourdin, Antoine","Camarena, Jeremy","Campillo, Audrey","Carcasses, Remy","Fachetti, David","Longuet, Sophie","Monvoisin, Clement","Rinaldi, Caroline","Rinaldi, Renato"}	{"Non Seagrass"}
1977205	Changes in macrophytes distribution in a hypersaline coastal lagoon associated with the development of intensively irrigated agriculture	2005	{"Lloret, J","Marin, A","Marin-Guirao, L","Velasco, J"}	{"Non Zostera","No Restoration Mentioned"}
1978283	Community structure and spatial variation of benthic invertebrates associated with Zostera marina (L) beds in the northern Baltic Sea	1997	{"Bonsdorff, E","Bostrom, C"}	{"No Stressor/Restoration","No Restoration Mentioned"}
2388016	Studies in human malaria. XXII. Prolonged suppression of Chesson strain vivax malaria by the weekly administration of chlorguanide or chloroquine.	1950	{"Coatney, G. R.","Cooper, W. C.","Culwell, W. B.","Eyles, D. E.","Lints, H.","White, W. C."}	{"Non Seagrass","Non Zostera","No Stressor/Restoration","No Restoration Mentioned"}
1975891	How a bottom-dweller beats the canopy: inhibition of an aquatic weed (Potamogeton pectinatus) by macroalgae (Chara spp.)	2010	{"Brederveld, Robert J.","Hidding, Bert","Nolet, Bart A."}	{"Non Seagrass"}
1977709	Concentrations of heavy metals and plant nutrients in water, sediments and aquatic macrophytes of anthropogenic lakes (former open cut brown coal mines) differing in stage of acidification	2001	{"Kempers, AJ","Samecka-Cymerman, A"}	{"Non Seagrass"}
1976263	Ecological Connectivity among Tropical Coastal Ecosystems	2009	NA	{"No Stressor/Restoration","Coastal Habitat"}
1978100	Effects of community structure on the seagrass Thalassia testudinum	1999	{"Dawes, CJ","Rose, CD"}	{"Non Zostera"}
1975631	Effect of nutrient availability on understory algae during El Nino Southern Oscillation (ENSO) conditions in Central Pacific Baja California	2011	{"Hernandez-Carmona, Gustavo","Ponce-Diaz, German","Riosmena-Rodriguez, Rafael","Serviere-Zaragoza, Elisa"}	{"Non Zostera"}
1979020	REPRODUCTIVE-BIOLOGY OF THE TROPICAL-SUBTROPICAL SEAGRASSES OF THE SOUTHEASTERN UNITED-STATES	1985	{"DURAKO, MJ","MOFFLER, MD"}	{"No Stressor/Restoration"}
1974712	Studies on breeding of Sargassum vachellianum on artificial reefs in Gouqi Island, China	2014	{"Chai, Zhaoyang","He, Peimin","He, Qing","Huang, Xiwen","Huo, Yuanzi","Jiang, Xingpei"}	{"Non Seagrass","Non Zostera"}
1976131	Nitrogen dynamics at the sediment-water interface in shallow, sub-tropical Florida Bay: why denitrification efficiency may decrease with increased eutrophication	2009	{"Gardner, Wayne S.","McCarthy, Mark J."}	{"Non Seagrass"}
1973343	Habitat preference for seaweed farming - A case study from Zanzibar, Tanzania	2018	{"Charisiadou, Stefania","Hedberg, Nils","Jiddawi, Narriman S.","Nordlund, Lina Mtwana","Tedengren, Michael","von Schreeb, Kristina"}	{"Non Seagrass"}
1975937	Dynamics of seagrass and macroalgal assemblages in Saipan Lagoon, Western Pacific Ocean: disturbances, pollution, and seasonal cycles	2010	{"Camacho, Rodney","Houk, Peter"}	{"Non Zostera"}
1978319	Myriophyllum heterophyllum Michx. (Haloragaceae), naturalized in Spain	1997	{"Cirujano, Santos","Medina, Leopoldo","Peris, Juan Bautista","Stubing, Grardo"}	{"Non Seagrass"}
1972541	Hurricane-Mediated Shifts in a Subtropical Seagrass Associated Fish and Macroinvertebrate Community	2020	{"Browder, Joan A.","Fratto, Zachary W.","Kavanagh, Christopher","Kelble, Christopher R.","Stabenau, Erik","Zink, Ian C."}	{"Non Zostera"}
1977618	Seasonal nitrogen speciation in temperate seagrass Posidonia oceanica (L.) Delile	2002	{"Invers, O","Perez, M","Romero, J"}	{"Non Zostera"}
1973526	Seagrass metabolism and carbon dynamics in a tropical coastal embayment	2017	{"Banerjee, Kakolee","Ganguly, Dipnarayan","Ramachandran, Purvaja","Ramachandran, Ramesh","Selvam, Arumughan Paneer","Singh, Gurmeet"}	{"No Stressor/Restoration"}
1977555	Ocean color remote sensing of seagrass and bathymetry in the Bahamas Banks by high-resolution airborne imagery	2003	{"Davis, CO","Dierssen, HM","Downes, TV","Leathers, RA","Zimmerman, RC"}	{"Non Zostera"}
1977840	Development of the exineless pollen wall in Callitriche truncata (Callitrichaceae) and the evolution of underwater pollination	2001	{"Cooper, RL","El-Ghazaly, G","Osborn, JM"}	{"Non Seagrass"}
1975235	Warming enhances sulphide stress of Mediterranean seagrass (Posidonia oceanica)	2012	{"Duarte, C. M.","Garcia, R.","Marba, N.","Sanchez-Camacho, M."}	{"Non Zostera"}
1979202	DISTRIBUTION AND GROWTH OF DEMERSAL O AGE RED SEA BREAM PAGRUS-MAJOR IN SHIJIKI BAY JAPAN	1980	{"AZETA M","AZUMA M","IKEMOTO R"}	{"Non Seagrass"}
1972484	Effects of air exposure on desiccation and photosynthetic performance of Cymodocea nodosa with and without epiphytes and Ulva rigida in comparison, under laboratory conditions	2020	{"Kariofillidou, G.","Malea, P.","Orfanidis, S.","Papathanasiou, V."}	{"Non Zostera"}
1974187	Contribution of mangroves to coastal carbon cycling in low latitude seas	2015	{"Alongi, Daniel M.","Mukhopadhyay, Sandip K."}	{"Non Seagrass","Non Zostera","No Stressor/Restoration","No Restoration Mentioned"}
1974120	Effects of in situ CO2 enrichment on structural characteristics, photosynthesis, and growth of the Mediterranean seagrass Posidonia oceanica	2016	{"Alliouane, Samir","Cox, T. Erin","Gattuso, Jean-Pierre","Gazeau, Frederic","Hendriks, Iris E.","Le Fur, Arnaud","Mahacek, Paul"}	{"Non Zostera"}
1972719	Spatial modelling of cumulative human pressure in the tropical coastscape of Zanzibar, Tanzania	2019	{"Kalliola, R.","Kayhko, N.","Khamis, Z. A."}	{"Non Zostera"}
1976047	Spatial Distribution and Ecological Characteristics of Zostera marina and Zostera japonica in the Seomjin Estuary	2010	{"CHOI, Woo-Jeung","Kim, Jeong-Bae","Lee, Jae Seong","Lee, Kun-Seop","Park, Jung-Im"}	{"No Stressor/Restoration"}
1979248	SIMULTANEOUS DETERMINATIONS OF NITRIFICATION AND NITRATE REDUCTION IN COASTAL SEDIMENTS BY A N-15 DILUTION TECHNIQUE	1978	{"HATTORI, A","KOIKE, I"}	{"Non Seagrass"}
1975571	Effects of sandy beach cusps on wrack accumulation, sediment characteristics and macrofaunal assemblages	2011	{"Duong, H. L. Stephanie","Fairweather, Peter G."}	{"Non Seagrass"}
1975471	Effects of epibiotic bacteria on leaf growth and epiphytes of the seagrass Posidonia oceanica	2012	{"Celdran, D.","Espinosa, E.","Marin, A.","Sanchez-Amat, A."}	{"Non Zostera"}
1976438	Trophic gradients in a large-river delta: Ecological structure determined by connectivity gradients in the Danube Delta (Romania)	2008	{"Buijse, Anthonie D. (Tom)","Buijse, Laura L.","Constantinescu, Adrian","Coops, Hugo","Covaliov, Silviu","Hanganu, Jenica","Ibelings, Bas W.","Menting, Geert","Navodaru, Ion","Oosterberg, Willem","Staras, Mircea","Torok, Liliana"}	{"Non Seagrass","Non Zostera","No Stressor/Restoration","No Restoration Mentioned"}
1974528	Mercury in the food chain of the Lagoon of Venice, Italy	2014	{"Amouroux, David","Bravo, Andrea G.","Dominik, Janusz","Sigovini, Marco","Spangenberg, Jorge E.","Tagliapietra, Davide","Zonta, Roberto"}	{"Non Seagrass"}
[truncated: 3,203 more rows]
