# Supplementary material for: Understanding trends in Zostera research, stressors, and response variables: a global systematic review of the seagrass genus
Source: PeerJ. 2025 Apr 17;13:e19209. doi: 10.7717/peerj.19209 (PMC12009562; doi:10.7717/peerj.19209)
Supplement: Supplemental Information 12 [file peerj-13-19209-s012.xlsx]

## Sheet: Supplemental Data S8.2
Supplemental Data S7.2, Articles Excluded at Full-Text Screening and Their Exclusion Reason
id	title	publication_year	authors	fulltext_exclusion_reasons
2388022	Studies on Labyrinthula the etiologic agent of the wasting disease of eel-grass	1943	{"Young, EL"}	{"No Stressor/Restoration"}
2100310	Trait sensitivities to seagrass fragmentation across spatial scales shape benthic community structure	2019	{"Fodrie, Fredrick Joel","Geyer, Julie K.","Yeager, Lauren A."}	{"No Stressor/Restoration"}
1978895	EXPERIMENTAL TRANSPLANTING OF SEAGRASSES IN BOTANY BAY, AUSTRALIA	1990	{"JACOBS, NE","ROBERTS, DE","WEST, RJ"}	{"No Stressor/Restoration"}
1979321	PHOSPHORUS CYCLING IN AN EELGRASS-M ZOSTERA-MARINA-M ECOSYSTEM	1972	{"BARSDATE R J","MC ROY C P","NEBERT M"}	{"No Stressor/Restoration"}
1979047	LARGE-SCALE SEAGRASS RESTORATION IN A DAMAGED ESTUARY	1985	{"THORHAUG, A"}	{"No Stressor/Restoration"}
1979291	PRELIMINARY OBSERVATIONS ON TRANSPLANTING AND A PHENOLOGICAL INDEX OF SEAGRASSES	1976	{"PHILLIPS R C"}	{"No Stressor/Restoration"}
2545930	Increasing marine ecosystems conservation linking marine protected areas and integrated coastal management in southern Cuba	2020	{"Caballero-Aragon, Hansel","Cobian-Rojas, Dorka","Espinosa-Pantoja, Leonardo","Ferro-Azcona, Hakna","Gonzalez-Mendez, Juliett","Hernandez-Avila, Aylem","Hernandez-Gonzalez, Zaimiuri","Lara, Ariagna","Perera-Valderrama, Susana","Ramon-Puebla, Adonis","de la Guardia-Llanso, Elena"}	{"No Stressor/Restoration"}
1978410	Development of planted seagrass beds in Tampa Bay, Florida, USA .1. Plant components	1996	{"Courtney, FX","Fonseca, MS","Kenworthy, WJ"}	{"No Stressor/Restoration"}
1976945	The functional value of Caribbean coral reef, seagrass and mangrove habitats to ecosystem processes	2006	{"BE Southward, AJ","Brumbaugh, Daniel R.","Dahlgren, Craig P.","Fuiman, LA","Harborne, Alastair R.","Holmes, Katherine E.","Micheli, Fiorenza","Mumby, Peter J.","Perry, Christopher T.","Young, CM"}	{"No Stressor/Restoration"}
1977846	Managing the Brisbane River and Moreton Bay: an integrated research/management program to reduce impacts on an Australian estuary	2001	{"Abal, EG","Dennison, WC","Greenfield, PF"}	{"Non Zostera"}
1978029	A stochastic model for seagrass (Zostera muelleri) in Port Phillip Bay, Victoria, Australia	1999	{"Bearlin, AR","Burgman, MA","Regan, HM"}	{"Management or Restoration"}
1978051	The effects of global climate change on seagrasses	1999	{"Neckles, HA","Short, FT"}	{Review}
1976341	Evolution of a Mediterranean Coastal Zone: Human Impacts on the Marine Environment of Cape Creus	2008	{"Lloret, Josep","Riera, Victoria"}	{"Management or Restoration",Review}
1975148	Climate change and ocean acidification effects on seagrasses and marine macroalgae	2013	{"Bowes, George","Koch, Marguerite","Ross, Cliff","Zhang, Xing-Hai"}	{Review}
1977016	Seagrasses: Biology, Ecology and Conservation	2006	NA	{Review}
1976383	Sea urchin overgrazing of seagrasses: A review of current knowledge on causes, consequences, and management	2008	{"Bandeira, S. O.","Eklof, J. S.","Gullstrom, M.","Lyimo, T.","Muthiga, N.","Uku, J.","de la Torre-Castro, M."}	{"Management or Restoration",Review}
1978378	Ecosystem model of an estuarine submersed plant community: Calibration and simulation of eutrophication responses	1996	{"Kemp, WM","Madden, CJ"}	{"Management or Restoration"}
1978192	Pilot experiments on planting seedlings and small seagrass propagules in western Australia	1998	{"Kirkman, H"}	{"Management or Restoration"}
1977679	Site-selection model for optimal transplantation of eelgrass Zostera marina in the northeastern US	2002	{"Burdick, DM","Davis, RC","Kopp, BS","Short, CA","Short, FT"}	{"Management or Restoration"}
2545949	The end of resilience: Surpassed nitrogen thresholds in coastal waters led to severe seagrass loss after decades of exposure to aquaculture effluents	2020	{"Herbeck, Lucia S.","Jennerjahn, Tim C.","Thomsen, Esther"}	{"Non Zostera"}
1978554	SEED DISPERSAL IN A MARINE MACROPHYTE - IMPLICATIONS FOR COLONIZATION AND RESTORATION	1994	{"LUCKENBACH, M","MOORE, KA","ORTH, RJ"}	{"Management or Restoration"}
1978266	Use of seagrass Zostera novazelandica (Setchell, 1933) as habitat and food by the crab Macrophthalmus hirtipes (Heller, 1862) (Brachyura: Ocypodidae) on rocky intertidal platforms in southern New Zealand	1997	{"Schiel, DR","Woods, CMC"}	{"No Stressor/Restoration"}
1978171	An integrated environmental assessment of the Red Sea coast of Saudi Arabia	1998	{"Jobbins, G","Ormond, RFG","Price, ARG","Shepherd, ARD"}	{"Management or Restoration"}
1977946	The effects of the polychaete Nereis diversicolor on the distribution and transplanting success of Zostera noltii	2000	{"Ball, L","Emson, D","Hughes, RG","Lloyd, D"}	{"Management or Restoration"}
1975065	Disconnects in EU and Greek fishery policies and practices in the eastern Aegean Sea and impacts on Posidonia oceanica meadows	2013	{"Miliou, Anastasia","Vlachopoulou, Eirini Ioanna","Wilson, A. Meriwether"}	{"Management or Restoration"}
1974998	Application of ordinal correspondence analysis for submerged aquatic vegetation monitoring	2013	{"Bernard, Guillaume","Bonhomme, Patrick","Mante, Claude","Nerini, David"}	{"Management or Restoration"}
1975979	Evidence of negative impacts of ecological tourism on turtlegrass (Thalassia testudinum) beds in a marine protected area of the Mexican Caribbean	2010	{"Cebrian, Just","Hauxwell, Jennifer","Herrera-Silveira, Jorge A.","Ralph, Peter","Ramirez-Ramirez, Javier"}	{"Management or Restoration"}
1975425	Seagrass Mapping Using ALOS AVNIR-2 Data In Lap An Lagoon, Thua Thien Hue, Viet Nam	2012	{"BE Frouin, RJ","Ebuchi, N","Ha Nam Thang","Pan, D","Saino, T","Tong Phuoc Hoang Son","Yoshino, Kunihiko"}	{"Management or Restoration"}
1975932	Chlorophyll a fluorescence as an indicator of establishment of Zostera marina transplants on the southern coast of Korea	2010	{"Lee, Kun-Seop","Li, Wen-Tao","Park, Jung-Im","Park, Sang Rul","Zhang, Xiu-mei"}	{"Management or Restoration"}
1977452	Evaluating vegetative transplant success in Posidonia australis: a field trial with habitat enhancement	2003	{"Campbell, ML","Paling, EI"}	{"Management or Restoration"}
1975965	Development of transplantation method for the restoration of surfgrass, Phyllospadix japonicus, in an exposed rocky shore using an artificial underwater structure	2010	{"Lee, Kun-Seop","Park, Jung-Im"}	{"Management or Restoration"}
1977336	An experimental evaluation of different methods of restoring Phyllospadix torreyi (Surfgrass)	2004	{"Bull, JS","Holbrook, SJ","Reed, DC"}	{"Management or Restoration"}
1975828	Seagrass (Posidonia oceanica) monitoring in western Mediterranean: implications for management and conservation	2010	{"Casazza, Gianna","Lopez y Royo, Cecilia","Pergent, Gerard","Pergent-Martini, Christine"}	{"Management or Restoration"}
1974359	Seagrass Viviparous Propagules as a Potential Long-Distance Dispersal Mechanism	2015	{"Booth, David J.","Keough, Michael J.","Macreadie, Peter I.","Ross, D. Jeff","Sherman, Craig D. H.","Smith, Timothy M.","Thomson, Alexandra C. G.","York, Paul H."}	{"Management or Restoration"}
1974713	An alert system for triggering different levels of coastal management urgency: Tunisia case study using rapid environmental assessment data	2014	{"Jaoui, K.","Jeudy de Grissac, A.","Pearson, M. P.","Price, A. R. G."}	{"Management or Restoration"}
1974745	Conservation of Eelgrass (Zostera marina) Genetic Diversity in a Mesocosm-Based Restoration Experiment	2014	{"Boyer, Katharyn E.","Cohen, C. Sarah","Ort, Brian S.","Reynolds, Laura K.","Tam, Sheh May","Wyllie-Echeverria, Sandy"}	{"Management or Restoration"}
1974794	A combined approach to assessing the conservation status of Cap des Trois Fourches as a potential MPA: is there a shortage of MPAs in the Southern Mediterranean?	2014	{"Bazairi, H.","Benhoussa, A.","Espinosa, F.","Garcia-Gomez, J. C.","Gonzalez, A. R.","Limam, A.","Maestre, M.","Navarro-Barranco, C."}	{"Management or Restoration"}
1974579	Seagrass rehabilitation off metropolitan Adelaide: a case study of loss, action, failure and success	2014	{"Fernandes, Milena","Fotheringham, Doug","Irving, Andrew D.","McArdle, Alicia","Murray-Jones, Sue","Tanner, Jason E."}	{"Management or Restoration"}
1974336	Temporal pattern in biometrics and nutrient stoichiometry of the intertidal seagrass Zostera japonica and its adaptation to air exposure in a temperate marine lagoon (China): Implications for restoration and management	2015	{"Liu, Bingjian","Liu, Peng","Liu, Xujia","Wang, Feng","Yang, Hongsheng","Zhang, Xiaomei","Zhou, Yi"}	{"Management or Restoration"}
1974182	The effect of parameter variability in the allometric projection of leaf growth rates for eelgrass (Zostera marina L.) II: the importance of data quality control procedures in bias reduction	2015	{"Cazarez-Castro, Nohe R.","Echavarria-Heras, Hector","Leal-Ramirez, Cecilia","Villa-Diharce, Enrique"}	{"Management or Restoration"}
1974151	Valuing Multiple Eelgrass Ecosystem Services in Sweden: Fish Production and Uptake of Carbon and Nitrogen	2016	{"Cole, Scott G.","Moksnes, Per-Olav"}	{"Management or Restoration"}
1975741	Seagrass habitat loss and fragmentation influence management strategies for a blue crab Callinectes sapidus fishery	2011	{"Hovel, Kevin A.","Mizerek, Toni","Regan, Helen M."}	{"Management or Restoration"}
1977957	Seagrass ecology and management: An introduction	2000	{"BE Bortone, SA","Kemp, WM"}	{"Review or Book"}
1976392	Empirical relationships linking distribution and abundance of marine vegetation to eutrophication	2008	{"Bostrom, Christoffer","Krause-Jensen, Dorte","Sagert, Sigrid","Schubert, Hendrik"}	{"No Stressor/Restoration"}
1978687	POLYMORPHISM AND DEVELOPMENT OF POSIDONIA-OCEANICA TRANSPLANTED FROM DIFFERENT PARTS OF THE MEDITERRANEAN INTO THE NATIONAL-PARK OF PORT-CROS	1993	{"CAYE, G","LOQUES, F","MEINESZ, A","MOLENAAR, H"}	{"Management or Restoration"}
1978628	Seagrasses and climate change	1994	{"BE Pernetta, J.","Brouns, J. J.","Elder, D.","Humphrey, S.","Leemans, R."}	{"Review or Book"}
1974558	Detecting the impacts of harbour construction on a seagrass habitat and its subsequent recovery	2014	{"Alcoverro, Teresa","Columbu, Sabina","Farina, Simone","Gera, Alessandro","Inglis, Graeme","Pages, Jordi F.","Roca, Guillem","Romero, Javier"}	{"Management or Restoration"}
1974304	Predicting effects of environmental change on a migratory herbivore	2015	{"Black, J. M.","Elkinton, E.","Gilkerson, W.","Petrie, M.","Stillman, R. A.","Ward, D. H.","Wood, K. A."}	{"No Stressor/Restoration"}
1974056	Tampa Bay estuary: Monitoring long-term recovery through regional partnerships	2016	{"Greening, Holly S.","Janicki, Anthony J.","Karlen, David J.","Sherwood, Edward T."}	{"Management or Restoration"}
1973938	Assessment of the establishment success of eelgrass Zostera marina (Alismatales: Zosteraceae) from seeds in a cost-effective seed protection method: implications for large-scale restoration	2016	{"Fang, Chao","Li, Wen-Tao","Liu, Yan-Shan","Zhang, Pei-Dong","Zhao, Jian-Sheng"}	{"Management or Restoration"}
1973422	SEAGRASS MONITORING IN SAN ANTONIO BAY, TEXAS WITH IMPLICATIONS FOR MANAGEMENT	2018	{"Hobson, Cynthia","Whisenant, Adam"}	{"Management or Restoration"}
1973375	Interannual Change Detection of Mediterranean Seagrasses Using RapidEye Image Time Series	2018	{"Reinartz, Peter","Traganos, Dimosthenis"}	{"Management or Restoration"}
1973324	Size and fitness responses of eelgrass (Zostera marina L.) following reciprocal transplant along an estuarine gradient	2018	{"Ruesink, J. L."}	{"Management or Restoration"}
1973317	Dispersal of seagrass propagules: interaction between hydrodynamics and substratum type	2018	{"Infantes, E.","Orfila, A.","Pereda-Briones, L.","Terrados, J.","Tomas, F."}	{"Management or Restoration"}
1973304	Assessing the effect of genetic diversity on the early establishment of the threatened seagrass Posidonia australis using a reciprocal-transplant experiment	2018	{"Bain, Keryn F.","Evans, Suzanna M.","Poore, Alistair G. B.","Sinclair, Elizabeth A.","Verges, Adriana"}	{"Management or Restoration"}
1973282	Seagrass ecosystem conservation in Southeast Asia needs to link science to policy and practice	2018	{"Fortes, Miguel D."}	{"Management or Restoration"}
1976151	THE FACILITATION OF SEAGRASS (ZOSTERA MARINA) GROWTH AND PRODUCTIVITY BY MERCENARIA MERCENARIA VIA LIGHT AND NUTRIENT STRESS ALLEVIATION	2009	{"Carroll, John","Gobler, Christopher J.","Peterson, Bradley J.","Wall, Charles C."}	{Conference}
1976866	Toward reversal of eutrophic conditions in a subtropical estuary: Water quality and seagrass response to nitrogen loading reductions in Tampa Bay, Florida, USA	2006	{"Greening, Holly","Janicki, Anthony"}	{"Management or Restoration"}
1976134	THE EFFECTS OF ROOT ZONE MANIPULATION ON MICROCOSM TURTLEGRASS (Thalassia testudinum) TRANSPLANTS	2009	{"Milbrandt, Eric C."}	{"Management or Restoration"}
1975731	Direct measurements of root growth and productivity in the seagrasses Posidonia australis and P-sinuosa	2011	{"Cambridge, Marion L.","Hovey, Renae K.","Kendrick, Gary A."}	{"Management or Restoration"}
1976234	Guidelines for seagrass restoration: Importance of habitat selection and donor population, spreading of risks, and ecosystem engineering effects	2009	{"Bos, A. R.","Hanssen, L. S. A. M.","Hermus, D. C. R.","de Jong, D. J.","de Jonge, V. N.","van Katwijk, M. M."}	{"Management or Restoration"}
1972738	Dwarf eelgrass (Zostera noltii) leaf fatty acid profile during a natural restoration process: Physiological and ecological implications	2019	{"Adao, Helena","Cacador, Isabel","Duarte, Bernardo","Marques, Joao Carlos","Matos, Ana Rita","Pedro, Silvia"}	{"Management or Restoration"}
1972688	Decadal dynamics and challenges for seagrass beds management in Cu Lao Cham Marine Protected Area, Central Vietnam	2019	{"Hieu, Duong","Ni, Tran N. K.","Saizen, Izuru","Tin, Hoang C.","Tu, Nguyen H. C.","Uyen, Nguyen T."}	{"Management or Restoration"}
1972574	Positive Ecological Interactions and the Success of Seagrass Restoration	2020	{"Orth, Robert J.","Silliman, Brian R.","Tarquinio, Flavia","Valdez, Stephanie R.","Vanderklift, Mathew A.","Zhang, Y. Stacy","van der Heide, Tjisse"}	{"Management or Restoration"}
1973823	Biological analyses of underwater video from ongoing monitoring and research cruises in Lochs Sunart, Etive and Alsh, sea lochs off South Skye, the Sounds of Barra and Arisaig, and around the Southern Trench.	2017	{"Moore, C.G."}	{"Management or Restoration"}
1974093	Marine protected areas in New South Wales	2016	{"BE Fitzsimons, J","Clarke, Pepe","Wescott, G"}	{"Review or Book"}
1978418	Fundamental study of tissue culture of eelgrass (Zostera marina L.)	1996	{"Goto, F.","Kawabata, T.","Shimatani, K.","Yoshihara, T."}	{"Ghost citation"}
1976365	Formation method of Zostera bed used as e.g. spawning ground of sea creatures, by mixing, to dredged soil, aggregation solidification agent having paper manufacture sludge incinerated ash as main component	NA	{"AHMED H A D","IMAI D","KATO T"}	{"Ghost citation"}
1974716	Underwater grass cultivation area for treatment of wastewater comprises planting areas for turf and eelgrass	NA	{"HE W"}	{"Ghost citation"}
1973697	Diversity Based Sustainable Management for Seagrass Ecosystem: Assessing Distribution and Diversity of Seagrass in Marine Protected Area	2017	{Annbariyanto,"Prasetya, Johan Danu","Purwanti, Frida",Supriharyono}	{"Management or Restoration"}
1973624	Marine reserves can mitigate and promote adaptation to climate change	2017	{"Carlos Castilla, Juan","Cury, Philippe Maurice","Duarte, Carlos M.","Lubchenco, Jane","McCauley, Douglas J.","O'Leary, Bethan C.","Pauly, Daniel","Rashid Sumaila, Ussif","Roberts, Callum M.","Saenz-Arroyo, Andrea","Wilson, Rod W.","Worm, Boris"}	{"Management or Restoration"}
1973613	A new marine measure enhancing Zostera marina seed germination and seedling survival	2017	{"Flindt, Mogens R.","Jorgensen, Lisbeth","Lillebo, I.","Sousa, Ana I.","Valdemarsen, Thomas"}	{"Management or Restoration"}
1972711	Use of bio-containers from seagrass wrack with nursery planting to improve the eco-sustainability of coastal habitat restoration	2019	{"Balestri, Elena","Cinelli, Patrizia","Lardicci, Claudio","Menicagli, Virginia","Seggiani, Maurizia","Vallerini, Flavia","Vannini, Claudia"}	{"Management or Restoration"}
1973167	Field transplantation of seagrass (Posidonia oceanica) seedlings: Effects of invasive algae and nutrients	2018	{"Pereda-Briones, L.","Terrados, J.","Tomas, F."}	{"Management or Restoration"}
1977333	Modeling and evaluating the ecosystem of sea-grass beds, shallow waters without sea-grass, and an oxygen-depleted offshore area	2004	{"Nakata, K","Sekiguchi, Y","Sohma, A"}	{"Management or Restoration"}
1976596	Resilience and restoration of soft-bottom near-shore ecosystems	2007	{"Prins, Herbert","van Langevelde, Frank"}	{"Management or Restoration"}
1973052	Boston Harbor, Boston, Massachusetts, USA: Transformation from 'the harbor of shame' to a vibrant coastal resource	2019	{"Baillie, C. J.","Bowen, J. L.","Geigley, K. A.","Gilbert, K. R.","Gorney, S. G.","Grabowski, J. H.","Hughes, A. R.","Scyphers, S. B.","Slevin, J."}	{"Management or Restoration"}
1973105	Eelgrass (Zostera marina L.) restoration in Puget Sound: development of a site suitability assessment process	2018	{"Aston, Lara","Borde, Amy","Buenau, Kate","Gaeckle, Jeffrey","Kaldy, James","Khangaonkar, Tarang","Thom, Ronald","Vavrinec, John","Woodruff, Dana"}	{"Management or Restoration"}
1972785	The growing role of aquaculture in ecosystem restoration	2019	{"Patterson, Joshua T."}	{"Management or Restoration"}
1976653	Linking water quality to living resources in a mid-Atlantic lagoon system, USA	2007	{"Carruthers, Tim J. B.","Dennison, William C.","Hall, Matthew R.","Orth, Robert J.","Sturgis, Brian","Wazniak, Catherine E."}	{"Management or Restoration"}
1975431	Boating impacts to seagrass in Florida Bay, Everglades National Park, Florida, USA: links with physical and visitor-use factors and implications for management	2012	{"Hallac, David E.","Herling, Fred","Pearlstine, Leonard","Sadle, Jimi","Shinde, Dilip"}	{"Management or Restoration"}
1977177	Local-scale mapping of benthic habitats to assess representation in a marine protected area	2005	{"Connolly, RM","Stevens, T"}	{"Management or Restoration"}
1977442	Vanishing seagrass (Zostera marina, L.) in Swedish coastal waters	2003	{"Baden, S","Gullstrom, M","Lunden, B","Pihl, L","Rosenberg, R"}	{"Management or Restoration"}
1978556	CONTRASTING EFFECTS OF HABITAT STRUCTURE ON THE RECRUITMENT AND MORTALITY OF AN EPIBIOTIC MACROALGA	1994	{"INGLIS, GJ"}	{"No Stressor/Restoration"}
1978986	SEAGRASS DISTRIBUTION SHIFTS IN THE CHESAPEAKE BAY USA INFLUENCE OF WATER QUALITY ON PLANT GROWTH AND PRODUCTION	1987	{"MOORE K A","NECKLES H A","ORTH R J","WETZEL R L"}	{Conference}
1977376	Effects of nutrient loading on shallow seagrass-dominated coastal systems: Patterns and processes	2004	{"BE Nielsen, SL","Banta, GT","Hauxwell, J","Pedersen, MF","Valiela, I"}	{"Review or Book"}
1976290	Effects of multiple disturbances in seagrass meadows: shading decreases resilience to grazing	2009	{"Eklof, Johan S.","Lavery, Paul S.","McMahon, Kathryn"}	{"Non Zostera"}
1976212	Submerged Aquatic Vegetation of the York River	2009	{"Moore, Kenneth A."}	{"Management or Restoration","Review or Book"}
1973222	Detection of seagrass scars using sparse coding and morphological filter	2018	{"Bissett, W. P.","Hill, V. J.","Islam, Kazi","Li, J.","Oguslu, E.","Perez, Daniel","Zimmerman, R. C."}	{"Non Zostera","Management or Restoration"}
1975992	The ecological role of Holothuria scabra (Echinodermata: Holothuroidea) within subtropical seagrass beds	2010	{"Burridge, Charis","Pitcher, Roland","Skewes, Timothy","Uthicke, Sven","Wolkenhauer, Svea-Mara"}	{"Non Zostera"}
1975636	Understanding uncertainty in seagrass injury recovery: an information-theoretic approach	2011	{"Fonseca, Mark S.","Kenworthy, W. Judson","Uhrin, Amy V."}	{"Non Zostera","Management or Restoration"}
1976334	Effects of nutrient enrichment in the nation's estuaries: A decade of change	2008	{"Boicourt, K.","Bricker, S. B.","Dennison, W.","Jones, A.","Longstaf, B.","Wicks, C.","Woerner, J."}	{"Management or Restoration","Review or Book"}
1976627	Setting load limits for nutrients and suspended solids based upon seagrass depth-limit targets	2007	{"Green, Whitney C.","Steward, Joel S."}	{"Non Zostera","Management or Restoration"}
1977000	Water anoxia and species selection in lagoons: An analysis of ecosystem dynamics	2006	{"BE Nketsa, A","Bertelle, C","Cannata, Giovanni","Cioffi, Francesco","Paludetto, M"}	{Conference}
1975597	Phytophthora gemini sp nov., a new species isolated from the halophilic plant Zostera marina in the Netherlands	2011	{"Brouwer, Henk","De Cock, Arthur W. A. M.","In't Veld, Willem A. Man","Rosendahl, Karin C. H. M."}	{"Non Zostera"}
1975591	Modelling suitable estuarine habitats for Zostera noltii, using Ecological Niche Factor Analysis and Bathymetric LiDAR	2011	{"Borja, Angel","Chust, Guillem","Galparsoro, Ibon","Mikel Garmendia, Joxe","Valle, Mireia"}	{"Management or Restoration"}
1977223	Applications of C and N stable isotopes to ecological and environmental studies in seagrass ecosystems	2004	{"Dauby, P","Gobert, S","Lepoint, G"}	{"Review or Book"}
1976040	Potential climate-change impacts on the Chesapeake Bay	2010	{"Adams, Mary Beth","Breitburg, Denise","Hershner, Carl","Howarth, Robert","Kemp, Michael","Mulholland, Margaret R.","Najjar, Raymond G.","Paolisso, Michael","Pyke, Christopher R.","Secor, David","Sellner, Kevin","Wardrop, Denice","Wood, Robert"}	{"Review or Book"}
1973267	A proposed decision support tool for prioritising conservation planning of Southeast Asian seagrass meadows: combined approaches based on ecosystem services and vulnerability analyses	2018	{"Saunders, Justine E.","Tan, Yi Mei","Yaakub, Siti Maryam"}	{"Non Zostera","Management or Restoration"}
1973878	Seagrass Ecosystem Services and Their Variability across Genera and Geographical Regions	2016	{"Barbier, Edward B.","Creed, Joel C.","Koch, Evamaria W.","Nordlund, Lina Mtwana"}	{"Management or Restoration","Review or Book"}
1973169	Early steps for successful management in small-scale fisheries: An analysis of fishers', managers' and scientists' opinions preceding implementation	2018	{"Wallner-Hahn, Sieglind","de la Torre-Castro, Maricela"}	{"Management or Restoration"}
1973277	Decadal biomass and area changes in a multi-species meadow in Singapore: application of multi-resolution satellite imagery	2018	{"Ali, Suryati M.","Bramante, James F.","Sin, Tsai M.","Ziegler, Alan D."}	{"Management or Restoration"}
1976560	Evidence of ecological impacts from excess nutrients in upper Narragansett Bay	2008	{"BE Desbonnet, A","CostaPierce, BA","Deacutis, Christopher F."}	{"Management or Restoration","Review or Book"}
1975207	Optimising economic and environmental outcomes: water quality challenges in Corner Inlet Victoria	2013	{"Anderssen, RS","BE Piantadosi, J","Beverly, C.","Boland, J","Doole, G.","Roberts, A.","Stott, K.","Vigiak, O."}	{"Management or Restoration"}
1973759	Twenty-first century climate change and submerged aquatic vegetation in a temperate estuary: the case of Chesapeake Bay	2017	{"Arnold, Thomas M.","Engelhardt, Katharina A. M.","Stevenson, J. Court","Zimmerman, Richard C."}	{"Review or Book"}
1975206	Detecting the infrastructural, demographic and climatic changes on macroalgal blooms using cellular automata simulation	2013	{"Anderssen, RS","BE Piantadosi, J","Boland, J","McArthur, L.","O'Neill, K.","Schreider, M.","Schreider, S."}	{"Management or Restoration"}
1972593	Seasonal occurrence patterns of seagrass should influence resource assessment and management decisions: A case study in the Indian River Lagoon and Loxahatchee River Estuary, Florida	2020	{"Arrington, D. Albrey","Harris, Rachel J.","Metz, Jerry L."}	{"Management or Restoration"}
2100393	Blue carbon in area-based coastal and marine management schemes - a review	2019	{"Moraes, Oliver"}	{"No Stressor/Restoration"}
1978580	USE OF IN-VITRO PROPAGATED RUPPIA-MARITIMA FOR SEAGRASS MEADOW RESTORATION	1994	{"BIRD, KT","FONSECA, MS","JEWETTSMITH, J"}	{"No Stressor/Restoration"}
1978595	ROLE OF CHLOROPHYLL AND CARBOHYDRATE CONTENTS IN SURVIVAL OF POSIDONIA-OCEANICA CUTTINGS TRANSPLANTED TO DIFFERENT DEPTHS	1994	{"CAYE, G","GENOT, I","MEINESZ, A","ORLANDINI, M"}	{"No Stressor/Restoration"}
1979360	Studies on Labyrinthula the etiologic agent of the wasting disease of eel-grass	1943	{"Young, EL"}	{"No Stressor/Restoration"}
2100018	Facilitating foundation species: The potential for plant-bivalve interactions to improve habitat restoration success	2020	{"Bengil, Elizabeth G. T.","Bostrom, Christoffer","Carugati, Laura","Christianen, Marjolijn J. A.","Danovaro, Roberto","Gagnon, Karine","Gambi, Cristina","Govers, Laura L.","Kipson, Silvija","Kizilkaya, Inci Tuney","Meysick, Lukas","Pajusalu, Liina","Rinde, E.","van Katwijk, Marieke M.","van de Koppel, Johan","van der Heide, Tjisse"}	{"No Stressor/Restoration"}
1979309	ZOSTERA TRANSPLANTS IN NORFOLK AND SUFFOLK, GREAT-BRITAIN	1974	{"BOORMAN, LA","PIZZEY, JM","RANWELL, DS","WATERS, RJ","WYER, DW"}	{"No Stressor/Restoration"}
1978603	CHANGES TO THE STRUCTURE AND PRODUCTIVITY OF A POSIDONIA-SINUOSA MEADOW DURING AND AFTER IMPOSED SHADING	1994	{"CHASE, SC","GORDON, DM","GREY, KA","SIMPSON, CJ"}	{"No Stressor/Restoration"}
1976642	Phenols content and 2-D electrophoresis protein pattern: a promising tool to monitor Posidonia meadows health state	2007	{"Albanese, Nadia N.","Giallongo, Agata","Migliore, Luciana","Randazzo, Davide","Rotini, Alice"}	{"No Stressor/Restoration"}
1976952	Benthic habitat dynamics and models on Australia's north west shelf.	2006	{"Althaus, F.","Althaus, F.","BA Fulton, E.","Fulton, E.","Hatfield, B.","Hatfield, B.","Sainsbury, K.","Sainsbury, K."}	{"No Stressor/Restoration"}
1978888	COMPARISON OF FAUNA AMONG NATURAL AND TRANSPLANTED EELGRASS ZOSTERA-MARINA MEADOWS - CRITERIA FOR MITIGATION	1990	{"COLBY, DR","FONSECA, MS","KENWORTHY, WJ","RITTMASTER, KA","THAYER, GW"}	{"No Stressor/Restoration"}
2545939	Evaluation method of importance of marine ecological protection, involves using combination of underwater sonar scanning, drone photography, underwater robot photography, satellite remote sensing image interpretation, and field surveys	NA	{"LIU J","LU W","YANG L","ZENG R"}	{"Management or Restoration"}
1979095	ANTHESIS AND SEED PRODUCTION IN ZOSTERA-MARINA L (EELGRASS) FROM THE CHESAPEAKE BAY	1983	{"MOORE, KA","ORTH, RJ","SILBERHORN, GM"}	{"Management or Restoration"}
1977413	Restoration of the eutrophic Orbetello lagoon (Tyrrhenian Sea, Italy): water quality management	2003	{"Lenzi, M","Palmieri, R","Porrello, S"}	{"Management or Restoration"}
1977011	Dynamics of seagrass stability and change	2006	{"BE Larkum, AW","Duarte, CM","Duarte, Carlos M.","Fourqurean, James W.","Krause-Jensen, Dorte","Olesen, Birgit","Orth, RJ"}	{Review}
1976597	Seagrass-sediment interactions, positive feedbacks and critical thresholds for occurrence: a review	2007	{"de Boer, W. F."}	{Review}
1975623	Extinction risk assessment of the world's seagrass species	2011	{"Bandeira, Salomao","Bujang, Japar Sidik","Calumpong, Hilconida P.","Carpenter, Kent E.","Carruthers, Tim J. B.","Coles, Robert G.","Dennison, William C.","Erftemeijer, Paul L. A.","Fortes, Miguel D.","Freeman, Aaren S.","Jagtap, T. G.","Kamal, Abu Hena M.","Kendrick, Gary A.","Kenworthy, W. Judson","La Nafie, Yayu A.","Livingstone, Suzanne R.","Nasution, Ichwan M.","Orth, Robert J.","Polidoro, …	{"Management or Restoration"}
1972887	Potential of Earth Observation (EO) technologies for seagrass ecosystem service assessments	2019	{"Hashim, Mazlan","Hossain, Mohammad Shawkat"}	{"Management or Restoration"}
1972926	Can marine reserves restore lost ecosystem functioning? A global synthesis.	2019	{"Altieri, Andrew H.","Cheng, Brian S.","Ruiz, Gregory M.","Torchin, Mark E."}	{"Management or Restoration"}
1973021	SEAGRASS ECOSYSTEMS: A CAREER-LONG QUEST TO UNDERSTAND THEIR INNER WORKINGS	2019	{"Heck, Kenneth L., Jr."}	{Review}
1977612	Challenges and opportunities for science in reducing nutrient over-enrichment of coastal ecosystems	2002	{"Boesch, DF"}	{Review}
1975070	Seagrass Meadows, Ecosystem Services, and Sustainability	2013	{"Cullen-Unsworth, Leanne","Unsworth, Richard"}	{Review}
1975140	Status of Marine Biodiversity of the China Seas	2013	{"Liu, J. Y."}	{"Management or Restoration"}
1977793	The interaction between water movement, sediment dynamics and submersed macrophytes	2001	{"Chambers, PA","James, WF","Koch, EW","Madsen, JD","Westlake, DF"}	{Review}
1978405	Responses of epiphytes on eelgrass, Zostera marina L, to separate and combined nitrogen and phosphorus enrichment	1996	{"Buckley, BA","Granger, SL","Lin, HJ","Nixon, SW","Taylor, DI"}	{"Non Seagrass"}
1974904	Ruppia maritima L. seed bank viability at the Everglades-Florida Bay ecotone	2013	{"Dutra, Elizabeth","Koch, Marguerite S.","Madclen, Christopher J.","Strazisar, Theresa"}	{"Management or Restoration"}
1974890	Assessing the CO2 capture potential of seagrass restoration projects	2013	{"Duarte, Carlos M.","Marba, Nuria","Sintes, Tomas"}	{"Management or Restoration"}
1974802	Seagrass amphipod assemblages in a Mediterranean marine protected area: a multiscale approach	2014	{"Gobert, Sylvie","Lepoint, Gilles","Navone, Augusto","Panzalis, Pieraugusto","Perez-Perera, Amanda","Sturaro, Nicolas","Vermeulen, Simon"}	{"Management or Restoration"}
1977221	Factors controlling seagrass revegetation onto dredged material deposits: A case study in Lower Laguna Madre, Texas	2004	{"Dunton, KH","Kaldy, JE","Kowalski, JL","Lee, KS"}	{"Management or Restoration"}
1974272	An examination of coastal conservation by remote sensing in Baja California Sur, Mexico.	2015	{"Alfredo Arreola-Lizarraga, Jose","Arturo Mendoza-Salgado, Renato","Ezequiel Cesena-Beltran, Gil","Felipe Beltran-Morales, Luis","Galina-Tessaro, Patricia","Maria Cruz-Garcia, Luz","Ortega-Rubio, Alfredo"}	{"Management or Restoration"}
1976012	Human influence on seagrass habitat fragmentation in NW Mediterranean Sea	2010	{"Albertelli, Giancarlo","Bianchi, Carlo Nike","Ferrari, Marco","Montefalcone, Monica","Morri, Carla","Parravicini, Valeriano","Vacchi, Matteo"}	{"Management or Restoration"}
1974435	CRITICAL AND PROTECTED HABITATS OF THE MEDITERRANEAN SEA: KNOWLEDGE FROM THE MAREA PROJECT AND INSIGHTS FOR THE MARITIME SPATIAL PLANNING.	2015	{"Spedicato, M.T."}	{"Management or Restoration"}
1974360	Assessing Posidonia oceanica Seedling Substrate Preference: An Experimental Determination of Seedling Anchorage Success in Rocky vs. Sandy Substrates	2015	{"Alagna, Adriana","Badalamenti, Fabio","D'Anna, Giovanni","Magliola, Carlo","Mazzola, Salvatore","Vega Fernandez, Tomas"}	{"Management or Restoration"}
1977245	New tools for marine conservation: the leasing and ownership of submerged lands	2004	{"Beck, MW","Bortman, ML","Marsh, TD","Reisewitz, SE"}	{"Management or Restoration"}
1977198	Water quality in the Great Barrier Reef region: responses of mangrove, seagrass and macroalgal communities	2005	{"Duke, NC","Mellors, J","Schaffelke, B"}	{"Management or Restoration"}
1975259	Changes in Genetic Structure of Posidonia oceanica at Monterosso al Mare (Ligurian Sea) and Its Resilience Over a Decade (1998-2009)	2012	{"Belmonte, Alessandro","Cupido, Roberta","Lombardi, Chiara","Micheli, Carla","Peirano, Andrea"}	{"Management or Restoration"}
1975842	Implications of conserving an ecosystem modifier: Increasing green turtle (Chelonia mydas) densities substantially alters seagrass meadows	2010	{"Alcoverro, Teresa","Arthur, Rohan","Lal, Aparna","Lill, Adrian W. T.","Marba, Nuria"}	{"Management or Restoration"}
1974460	Estimating Benefits in a Recovering Estuary: Tampa Bay, Florida	2015	{"Greening, Holly","Russell, Marc"}	{"Management or Restoration"}
1974313	Detecting water quality improvement along the Catalan coast (Spain) using stress-specific biochemical seagrass indicators	2015	{"Alcoverro, Teresa","Bennett, Scott","Farina, Simone","Manzanera, Marta","Martinez-Crego, Begona","Perez, Marta","Roca, Guillem","Romero, Javier","de Torres, Mariona"}	{"Management or Restoration"}
1974244	What lies beneath: Why knowledge of belowground biomass dynamics is crucial to effective seagrass management	2015	{"Christianen, Marjolijn J. A.","O'Brien, Katherine R.","Stapel, Johan","Vonk, J. Arie"}	{"Management or Restoration"}
1974117	A Case Study of the Sea Area Utilization Consultation for the Conservation of Marine Protected Seagrass Species	2016	{"OH, Hyun Taik","Yi, Yong Min",ÍπÄÌòúÏßÑ}	{"Management or Restoration"}
1979281	THE WASTING DISEASE OF EELGRASS ZOSTERA-MARINA AND ITS EFFECTS ON ENVIRONMENTAL FACTORS AND FAUNA	1977	{"RASMUSSEN E"}	{Review}
1978363	Eutrophication gradients in coastal lagoons as exemplified by the Bassin d'Arcachon and the Etang du Prevost	1996	{"Castel, J","Caumette, P","Herbert, R"}	{"No Stressor/Restoration"}
1976398	An economical non-destructive method for estimating eelgrass, Zostera marina (Potamogetonaceae) leaf growth rates: formal development and use in northwestern Baja California	2008	{"Echavarria-Heras, Hector","Franco-Vizcaino, Ernesto","Solana-Arellano, Elena"}	{"Management or Restoration"}
1974834	Science and Management of the Introduced Seagrass Zostera japonica in North America	2014	{"Gaeckle, Jeffrey L.","Kaldy, James E.","Shafer, Deborah J."}	{"Management or Restoration"}
1974657	Effects of common seagrass restoration methods on ecosystem structure in subtropical seagrass meadows	2014	{"Bourque, Amanda S.","Fourqurean, James W."}	{"Management or Restoration"}
1974550	Comparison of seasonal growth responses of Zostera marina transplants to determine the optimal transplant season for habitat restoration	2014	{"Du, Guo-Ying","Kim, Young Kyun","Lee, Kun-Seop","Li, Wen-Tao","Park, Jung-Im","Zhang, Xiu-mei"}	{"Management or Restoration"}
1976395	Effects of fish farm waste on Posidonia oceanica meadows: Synthesis and provision of monitoring and management tools	2008	{"Argyrou, Marina","Dalsgaard, Tage","Danovaro, Roberto","Diaz-Almela, Elena","Duarte, Carlos M.","Frederiksen, Morten","Grau, Antoni","Holmer, Marianne","Karakassis, Ioannis","Marba, Nuria","Mirto, Simone","Perez, Marta","Pusceddu, Antonio","Tsapakis, Manolis"}	{"Management or Restoration"}
1974591	CO2 concentrating mechanisms and environmental change	2014	{"Beardall, J.","Raven, J. A."}	{"Review or Book"}
1973975	Towards protecting the Great Barrier Reef from land-based pollution	2016	{"Kroon, Frederieke J.","Schaffelke, Britta","Thorburn, Peter","Whitten, Stuart"}	{"Management or Restoration"}
1976143	Odense Pilot River Basin: implementation of the EU Water Framework Directive in a shallow eutrophic estuary (Odense Fjord, Denmark) and its upstream catchment	2009	{"Jensen, Mikael Hjorth","Jorgensen, Ole Tyrsted","Madsen, Harley Bundgaard","Nielsen, Susanne V. Koch","Pedersen, Cathrine Bogh","Petersen, Jorgen Dan","Petersen, Stig Eggert","Rask, Nanna"}	{"Management or Restoration"}
1974560	Persistence of Zostera marina L. (eelgrass) seeds in the sediment seed bank	2014	{"Jarvis, Jessie C.","Kenworthy, W. Judson","Moore, Kenneth A."}	{"Management or Restoration"}
1974046	Marine protected areas are insufficient to conserve global marine plant diversity	2016	{"Daru, Barnabas H.","le Roux, Peter C."}	{"Management or Restoration"}
1972988	A model for the biomass-density dynamics of seagrasses developed and calibrated on global data	2019	{"Creed, Joel C.","Lopes, Ines E.","Vieira, Vasco M. N. C. S."}	{"No Stressor/Restoration","Management or Restoration"}
1977847	Catchment management and the Great Barrier Reef	2001	{"Brodie, J","Christie, C","Devlin, M","Haynes, D","Morris, S","Ramsay, M","Waterhouse, J","Yorkston, H"}	{"Management or Restoration"}
1974536	An Effective Method for Collecting and Storing Seeds from Zostera marina (Eelgrass) in the Yellow Sea, China	2014	{"Han, Houwei","Jiang, Xin","Jiang, Yongxin","Li, Xiaojie","Li, Zhiling","Pan, Jinhua","Song, Shaofeng","Wu, Ruina","Yang, Guanpin","Yu, Shenhui","Zhang, Zhuangzhi","Zhao, Nan"}	{"Management or Restoration"}
1974533	The effect of parameter variability in the allometric projection of leaf growth rates for eelgrass (Zostera marina L.)	2014	{"Echavarria-Heras, Hector","Leal-Ramirez, Cecilia","Lee, Kun-Seop","Solana-Arellano, Elena"}	{"Management or Restoration"}
1974484	Factors influencing the growth of seagrass seedlings: A case study of Posidonia australis	2015	{"Glasby, Tim M.","Housefield, Graham P.","Taylor, Skye L."}	{"Management or Restoration"}
1977955	Science and technology needs for marine fishery habitat restoration	2000	{"GP IEEE; IEEE","Turek, JG"}	{"Management or Restoration"}
1975433	A comparative assessment of approaches and outcomes for seagrass revegetation in Shark Bay and Florida Bay	2012	{"Dixon, Kingsley W.","Hovey, Renae K.","Kendrick, Gary A.","Statton, John"}	{"Management or Restoration"}
1973750	Artificial seagrass leaves shield transplanted seagrass seedlings and increase their survivorship	2017	{"Bergasa, Oscar","Espino, Fernando","Robaina, Rafael R.","Tuya, Fernando","Vila, Francisco","Zarranz, Maite"}	{"Management or Restoration"}
1972882	Blue carbon in area-based coastal and marine management schemes - a review	2019	{"Moraes, Oliver"}	{"Review or Book"}
1972834	IMPORTANCE OF SEAGRASSES: A REVIEW FOR FIJI ISLANDS	2019	{"Singh, Shalini"}	{"Review or Book"}
1972678	Seed selection and storage with nano-silver and copper as potential antibacterial agents for the seagrass Zostera marina: implications for habitat restoration	2019	{"Gu, Ruiting","Xu, Shaochun","Xu, Shuai","Yue, Shidong","Zhang, Xiaomei","Zhang, Yu","Zhou, Yi"}	{"Management or Restoration"}
1976507	Seagrass ecosystems: their global status and prospects	2008	{"BE Polunin, NVC","Borum, Jens","Duarte, Carlos M.","Short, Frederick T.","Walker, Diana I."}	{"Review or Book"}
1977586	Recovery of Posidonia meadows in oyster harbour, southwestern Australia	2002	{"Bastyan, GR","Cambridge, ML","Walker, DI"}	{"Management or Restoration"}
1977375	Can food-web interactions explain the structure of eelgrass communities in the field?	2004	{"Douglass, James G.","Duffy, James E.","France, Kristin E."}	{Conference}
1978180	Potential for seagrass restoration in Galveston Bay, Texas	1998	{"Hammerstrom, K","McMahan, G","Sheridan, P"}	{"Management or Restoration"}
1974850	Validation of seabed habitat MPA search feature records relating to the South Arran Nature Conservation MPA.	2014	{"Howson, C.","Steel, L."}	{"Management or Restoration"}
1979349	Investigations in vegetation and habitats of beach meadows on the west coast of Sweden	1960	{"GILLNER, VILHELM"}	{"Not accessible",Conference}
1979010	ON THE GROWTH OF EEL GRASS ZOSTERA-MARINA L. AFTER TRANSPLANTING THE INFLUENCE OF THE SEEDLING AGE AND NUTRIENT CONDITION OF THE SUBSTRATE	1986	{"KIKUCHI K","TERAWAKI T","WATANABE Y"}	{"Ghost citation"}
1977132	Zostera bed has sea bottom solar radiation amount, shields number, depth of water during low tide, water temperature and salt content which are controllable in predetermined range suited for the growth of Zostera	NA	{"INAGAKI S","KATSUI H","KOSHIKAWA Y","RIN B K","SHINPO H","TAKAYAMA Y","TANAKA M","UENO S","YAMAKI K"}	{"Ghost citation"}
1978946	DEVELOPMENT OF TECHNIQUE FOR MARINE MACROPHYTE BED CREATION IN THE COASTAL ZONE NEAR POWER PLANT-10 METHOD FOR EELGRASS ZOSTERA-MARINA L. BED CREATION BY SEEDLING	1988	{"HONDA M","KAWASAKI Y","YAMADA S"}	{"Not accessible","Technical Report"}
1975303	Method for restoring shallow sea grass bed, involves selecting restoring ground, cleaning large oyster shell, rubbish and large algae, and leveling uneven terrain before transplantation, and selecting different types of sea grass	NA	{"FAN H","LI L","LI S","QIU G","ZENG C","ZHOU H"}	{"Ghost citation"}
1975058	Plate for transplanting seagrass, has accommodating chambers that are opened in upper portion to transplant seagrass in transplant space filled with mixture of fertilizer and starch to bottom of sea horizontally through free fall	NA	{"SUN P G"}	{"Ghost citation"}
1974012	Storing Zostera marina seedling involves collecting Zostera marina seed from sea water and putting in clean open container under dark environment, cleaning Zostera marina with sea water at equal temperature and changing sea water	NA	{"HAN X","JIN Y","ZHANG F","ZHENG F"}	{"Ghost citation"}
1973404	Process for restoring underwater aquatic plants to damaged location within estuary, involves allowing sediment tube to season for period of time, and creating opening within biodegradable outer layer of sediment tube	NA	{"ANDERSON J"}	{"Ghost citation"}
1978764	NUTRIENT CONCENTRATION OF AQUATIC PLANTS - PATTERNS ACROSS SPECIES	1992	{"DUARTE, CM"}	{"No Stressor/Restoration","Review or Book"}
1973795	Fishers and conservation: sharing the case study of Hinase, Japan	2017	{"Hori, Masakazu","Makino, Mitsutaku","Tsurita, Izumi"}	{"Management or Restoration"}
1973781	A FRAMEWORK FOR IDENTIFICATION OF ECOLOGICAL CONSERVATION PRIORITIES FOR MARINE PROTECTED AREA NETWORK DESIGN AND ITS APPLICATION IN THE NORTHERN SHELF BIOREGION.	2017	NA	{"Management or Restoration"}
1973712	Copper treatment during storage reduces Phytophthora and Halophytophthora infection of Zostera marina seeds used for restoration	2017	{"Govers, Laura L.","Heusinkveld, Jannes H. T.","Man in't Veld, Willem A.","Meffert, Johan P.","van Rijswick, Patricia C. J.","van der Heide, Tjisse","van der Zee, Els M."}	{"Management or Restoration"}
1973695	Evaluation of Granulated Coal Ash as Artificial Seabed for Eelgrass	2017	{"Hibino, Tadashi","Kim, Kyung-Hoi","Koshikawa, Yoshinori","Nakamoto, Kenji","Nakashita, Shinya"}	{"Management or Restoration"}
1973546	Establishment of Marine Protected Areas to Reduce Watercraft Impacts in Barnegat Bay, New Jersey	2017	{"Belton, Thomas J.","Bognar, John","Buenaventura, Eden","Ciappi, Michael","Green, Edwin","Lathrop, Richard G."}	{"Management or Restoration"}
1972731	A False Sense of Protection: Recreational Uses and Illegal Behavior in a Mediterranean Marine Protected Area and Implications for Management	2019	{"La Manna, Gabriella","Sara, Gianluca"}	{"Management or Restoration"}
1977885	Autumn biomass, below-ground productivity, rhizome growth at bed edge and nitrogen content in seagrasses from Western Australia	2000	{"McComb, AJ","Paling, EI"}	{"Non Zostera"}
1975535	Priority Reef Areas in the Pacific Coast of the Philippines for Marine Protected Area Deployment	2011	{"Licuanan, Wilfredo Y.","Luzon, Katrina S.","Medina, Marianne Lorelei S.","Nanola, Cleto L., Jr.","Roleda, Michael Y.","Rollon, Rene N.","Samson, Maricar S."}	{"Management or Restoration"}
1976794	Angiosperms (seagrass) within the EU water framework directive: A UK perspective	2007	{"Brazier, D. P.","Foden, Jo"}	{"Management or Restoration"}
1976109	Ecological indicators for assessing and communicating seagrass status and trends in Florida Bay	2009	{"Cunniff, Kevin M.","Fourqurean, James W.","Madden, Christopher J.","McDonald, Amanda A.","Rudnick, David T."}	{"Management or Restoration"}
1975802	Balancing economic development and conservation of living marine resources and habitats: the role of resource managers	2011	{"BE Shumway, SE","Getchis, Tessa L.","Rose, Cori M."}	{"Management or Restoration"}
1973259	Process and apparatus for the restoration of seagrass	2018	{"Anderson, James"}	{"Management or Restoration"}
1972825	Toward a Coordinated Global Observing System for Seagrasses and Marine Macroalgae	2019	{"Ambo-Rappe, Rohani","Benedetti-Cecchi, Lisandro","Bostrom, Christoffer","Buschmann, Alejandro H.","Byrnes, Jarrett","Coles, Robert G.","Creed, Joel","Cullen-Unsworth, Leanne C.","Diaz-Pulido, Guillermo","Duarte, Carlos M.","Duffy, J. Emmett","Edgar, Graham J.","Fortes, Miguel","Goni, Gustavo","Hu, Chuanmin","Huang, Xiaoping","Hurd, Catriona L.","Johnson, Craig","Konar, Brenda","Krause-Jensen, D…	{"Management or Restoration","Review or Book"}
1972819	Estuary habitat associations for juvenile Pacific salmon and pelagic fish: Implications for coastal planning processes	2019	{"Arbeider, Michael","Carr-Harris, Charmaine","Moore, Jonathan W.","Sharpe, Clara","Wilson, Samantha M."}	{"Management or Restoration"}
1972492	Estimating the Potential Blue Carbon Gains From Tidal Marsh Rehabilitation: A Case Study From South Eastern Australia	2020	{"Carnell, Paul E.","Gulliver, Anne","Macreadie, Peter","Masque, Pere","Trevathan-Tackett, Stacey M.","de Paula Costa, Micheli Duarte"}	{"Management or Restoration"}
1973896	Functional implications of changes in seagrass species composition in two shallow coastal lagoons	2016	{"Cebrian, Just","Christiaen, Bart","Goff, Joshua","Lehrter, John C."}	{"Management or Restoration"}
1976043	Coastal fish assemblage characterisation to support the zoning of a new Marine Protected Area in north-western Mediterranean	2010	{"La Mesa, G.","Molinari, A.","Tunesi, L."}	{"Non Seagrass"}
1975602	Ecological status of seagrass ecosystems: An uncertainty analysis of the meadow classification based on the Posidonia oceanica multivariate index (POMI)	2011	{"Alcoverro, Teresa","Bennett, Scott","Roca, Guillem","Romero, Javier"}	{"Management or Restoration"}
1973787	Scaling the Costs of Natural Ecosystem Degradation and Biodiversity Losses in Aceh Province, Sumatra	2017	{"BE Shivakoti, GP","Cochard, R.",Helmi,"Pradhan, U"}	{"Management or Restoration"}
1972499	Marine natural capital and ecosystem services: An environmental accounting model	2020	{"Appolloni, Luca","Buonocore, Elvira","Donnarumma, Luigia","Franzese, Pier Paolo","Miccio, Antonino","Russo, Giovanni F."}	{"Management or Restoration"}
1975791	Seascape ecology of coastal biogenic habitats: advances, gaps, and challenges	2011	{"Bostrom, Christoffer","Kneib, Ronald T.","Pittman, Simon J.","Simenstad, Charles"}	{"Management or Restoration","Review or Book"}
1973794	Communities and blue carbon: the role of traditional management systems in providing benefits for carbon storage, biodiversity conservation and livelihoods	2017	{"Vierros, Marjo"}	{"Management or Restoration"}
1977691	Comparative evidence that salt marshes and mangroves may protect seagrass meadows from land-derived nitrogen loads	2002	{"Cole, ML","Valiela, I"}	{"Review or Book"}
1978512	SUBMERGED AQUATIC VEGETATION IN RELATION TO DIFFERENT NUTRIENT REGIMES	1995	{"DUARTE, CM"}	{"Review or Book"}
1977883	Overview of the physiological ecology of carbon metabolism in seagrasses	2000	{"Burkholder, JM","Touchette, BW"}	{"Review or Book"}
1975228	Herbicide-induced macrophyte-to-phytoplankton shifts in Japanese lagoons during the last 50 years: consequences for ecosystem services and fisheries	2012	{"Yamamuro, Masumi"}	{"Review or Book"}
1973344	Life history events of eelgrass Zostera marina L. populations across gradients of latitude and temperature	2018	{"Blok, S. E.","Krause-Jensen, D.","Olesen, B."}	{"Review or Book"}
1976373	Spatial probability modelling of eelgrass (Zostera marina) distribution on the west coast of Norway	2008	{"Bakkestuen, Vegar","Bekkby, Trine","Christensen, Ole","Erikstad, Lars","Isachsen, Pal Erik","Isaeus, Martin","Longva, Oddvar","Rinde, Eli"}	{"Management or Restoration"}
1972791	Global-change controls on soil-carbon accumulation and loss in coastal vegetated ecosystems	2019	{"Bowen, Jennifer L.","Canuel, Elizabeth A.","Hopkinson, Charles S.","Sanderman, Jonathan","Spivak, Amanda C."}	{"Management or Restoration","Review or Book"}
1975664	Genetic structure and gene flow of eelgrass Zostera marina populations in Tokyo Bay, Japan: implications for their restoration	2011	{"Demise, Teruko","Ishii, Mitsuhiro","Nakaoka, Masahiro","Shoji, Yasumasa","Tanaka, Norio"}	{"No Stressor/Restoration"}
1977565	Neural network-based estimation of light attenuation coefficient	2003	{"GP IEEE; IEEE","Morris, LJ","Musavi, MT","Natarajan, P","Ressom, H","Srirangam, S","Tweedale, W","Virnstein, RW"}	{"Non Zostera"}
1975803	Restoration of Seagrass Community to Reverse Eutrophication in Estuaries	2011	{"BE Wolanski, E","Cardoso, P.","Dolbeth, M.","Duarte, A. C.","Flindt, M. R.","Leston, S.","Lillebo, A. I.","McLusky, D","Pardal, M. A.","Pereira, M. E."}	{"Management or Restoration","Review or Book"}
1973067	Intervention Options to Accelerate Ecosystem Recovery From Coastal Eutrophication	2018	{"Duarte, Carlos M.","Krause-Jensen, Dorte"}	{"Management or Restoration","Review or Book"}
1973025	THE POTENTIAL USE OF SEAGRASS HERBIVORY PATTERNS AS AN INDICATOR OF HERBIVORE COMMUNITY CHANGE AFTER TROPICAL MARINE PROTECTED AREA ESTABLISHMENT	2019	{"Carroll, John M.","Finelli, Christopher M.","Peterson, Bradley J.","Stubler, Amber D."}	{"Non Zostera","Management or Restoration"}
1975531	New Zealand seagrass - More threatened than IUCN review indicates	2011	{"Gemmill, C. E. C.","Lundquist, C. J.","Matheson, F. E.","Pilditch, C. A."}	{"Management or Restoration"}
1975484	Eelgrass recovery in the coastal bays of the Virginia Coast Reserve, USA INTRODUCTION	2012	{"McGlathery, Karen J.","Orth, Robert J."}	{"Management or Restoration"}
1975501	Phytoplankton productivity in interlinked mangroves, seagrass and coral reefs and its ecotones in Gulf of Mannar Biosphere Reserve South east India	2012	{"Alikunhi, Nabeel M.","Kathiresan, Kandasamy"}	{"Management or Restoration"}
1973839	Eelgrass and Macroalgal Mapping to Develop Nutrient Criteria in New Hampshire's Estuaries using Hyperspectral Imagery	2016	{"Lippmann, Thomas","Mathieson, Arthur","Morrison, J. Ru","Pe'eri, Shachak","Short, Fred"}	{"Non Zostera","No Stressor/Restoration"}
1973681	Resilience indicators support valuation of estuarine ecosystem restoration under climate change	2017	{"Barber, M. C.","Glibert, P. M.","Gurbisz, C.","Houde, E. D.","Kemp, W. M.","Richkus, J.","Secor, D. H.","Wainger, L. A."}	{"Management or Restoration","Review or Book"}
1973342	Spatially explicit risk approach for multi-hazard assessment and management in marine environment: The case study of the Adriatic Sea	2018	{"Critto, Andrea","Furlan, Elisa","Marcomini, Antonio","Torresan, Silvia"}	{"Management or Restoration"}
1975689	Effects of extreme climate events on the macrobenthic communities' structure and functioning of a temperate estuary	2011	{"Bordalo, M. D.","Cardoso, P. G.","Dolbeth, M.","Grilo, T. F.","Pardal, M. A."}	{"No Stressor/Restoration"}
1973381	Exposure of coastal ecosystems to river plume spreading across a near-equatorial continental shelf	2018	{"Bouma, T. J.","Christianen, M. J. A.","Hoeksema, B. W.","Hoitink, A. J. F.","Lamers, L. P. M.","Tarya, A.","Van der Vegt, M.","van Katwijk, M. M."}	{"Non Zostera"}
1973106	Differential effects of biological invasions on coastal blue carbon: A global review and meta-analysis	2018	{"Cott, Grace M.","Davidson, Ian C.","Devaney, John L.","Simkanin, Christina"}	{"Management or Restoration","Review or Book"}
1972802	Distribution status of seagrass and its relationship with different habitat types in Liusha bay of Guangdong province.	2019	{"Chao, Zhong","Kai-feng, Sun","Min, Xu","Qian-ting, Yin","Qing-hua, Chen","Shi-bin, Qi","Yan, Liao"}	{"Non Zostera"}
2545953	Letter to the editor regarding the article "Taking advantage of seagrass recovery potential to develop novel and effective meadow rehabilitation methods" by Alagna et al., published in Marine Pollution Bulletin, 149: 2019 (110578)	2020	{"Calvo, Sebastiano","Pirrotta, Maria","Tomasello, Agostino"}	{"Non Zostera"}
2100038	Long-term seagrass degradation: Integrating landscape, demographic, and genetic responses	2020	{"Alberto, Filipe","Banolas, Gonzalo","Curbelo, Leticia","Espino, Fernando","Manent, Pablo","Tuya, Fernando"}	{"No Stressor/Restoration"}
1978890	VARIATIONS IN SUCCESS OF EELGRASS TRANSPLANTS OVER A 5-YEARS PERIOD	1990	{"HARRISON, PG"}	{"No Stressor/Restoration"}
1978403	Development of planted seagrass beds in Tampa Bay, Florida, USA .2. Faunal components	1996	{"Fonseca, MS","Hall, MO","Meyer, DL"}	{"No Stressor/Restoration"}
1978153	Factors affecting restoration of Halodule wrightii to Galveston bay, Texas	1998	{"Hammerstrom, K","McMahan, G","Pulich, W","Sheridan, P"}	{"No Stressor/Restoration"}
2545972	Opportunities for blue carbon strategies in China	2020	{"Chen, Guangcheng","Chung, Ikkyo","Duarte, Carlos M.","Fan, Wei","Gu, Jiali","He, Zhiguo","Krause-Jensen, Dorte","Marba, Nuria","Pan, Yiwen","Qiu, Wanfei","Rivkin, Richard B.","Serrano, Oscar","Wu, Jiaping","Xiao, Xi","Zhang, Haibo","Zhang, Xiujuan","Zhang, Zhaohui","Zhao, Peng","Zheng, Yuhan"}	{"No Stressor/Restoration"}
2100207	Secondary Production of Kelp Bass Paralabrax clathratus in Relation to Coastal Eelgrass Zostera marina Habitat in a Southern California Marine Protected Area	2019	{"Ginsburg, David W.","Obaza, Adam K.","Tanner, Richelle L."}	{"No Stressor/Restoration"}
1979232	FLOWERING AND FRUITING OF RESTORED THALASSIA BEDS - PRELIMINARY NOTE	1979	{"THORHAUG, A"}	{"Non Zostera"}
1976725	Ecosystem-based management and models in sustainable management of coastal aquaculture	2007	{"Chen, Changsheng","Rawson, Mac","Sullivan, Jim","Wang, Daoru","Wang, Lu","Yarish, Charles","Zhu, MingYuan"}	{"No Stressor/Restoration"}
1976641	Site-specific success of three transplanting methods and the effect of planting time on the establishment of Zostera marina transplants	2007	{"Lee, Kun-Seop","Park, Jung-Im"}	{"No Stressor/Restoration"}
2100336	Capsule type seed germination transplant apparatus useful for forming coastal sea forests, comprises capsule formed with accommodation space, seagrass seed provided in accommodation space, and fertilizer provided with the seagrass seed	NA	{"GU J",KOOJAGEUN}	{"Management or Restoration"}
1977984	Seagrass ecology at the turn of the millennium: challenges for the new century	1999	{"Duarte, CM"}	{"Management or Restoration"}
1977476	Forecasting responses of seagrass distributions to changing water quality using monitoring data	2003	{"Boyer, JN","Durako, MJ","Fourqurean, JW","Hefty, LN","Peterson, BJ"}	{"Management or Restoration"}
1977388	Relative effects of grazers and nutrients on seagrasses: a meta-analysis approach	2004	{"Bando, KJ","Hughes, AR","Rodriguez, LF","Williams, SL"}	{Review}
1972500	Social and ecological outcomes of conservation interventions in tropical coastal marine ecosystems: a systematic map protocol	2020	{"Ahmadia, Gabby N.","Andradi-Brown, Dominic A.","Brooks, Willa R.","Campbell, Lisa M.","Cheng, Samantha H.","Gill, David A.","Glew, Louise","Rudd, Morgan E.","Silliman, Brian R."}	{"Management or Restoration"}
1972851	A human impact metric for coastal ecosystems with application to seagrass beds in Atlantic Canada	2019	{"Lotze, Heike K.","Murphy, Grace E. P.","Wong, Melisa C."}	{"Management or Restoration"}
1975021	Identifying robust bioindicators of light stress in seagrasses: A meta-analysis	2013	{"Collier, Catherine","Lavery, Paul S.","McMahon, Kathryn"}	{Review}
1974678	Interactions between global and local stressors of ecosystems determine management effectiveness in cumulative impact mapping	2014	{"Brown, Christopher J.","Possingham, Hugh P.","Richardson, Anthony J.","Saunders, Megan I."}	{"Management or Restoration",Review}
1977818	Mechanical seagrass transplantation in Western Australia	2001	{"Dyhrberg, R","Paling, EI","Phillips, J","Wheeler, K","van Keulen, M"}	{"Management or Restoration"}
1977925	A review of issues in seagrass seed dormancy and germination: implications for conservation and restoration	2000	{"Bailey, EM","Bartholomew, A","Harwell, MC","Jawad, JT","Lombana, AV","Moore, KA","Orth, RJ","Rhode, JM","Woods, HE"}	{"Management or Restoration",Review}
1978047	Eelgrass (Zostera marina L.) seed protection for field experiments and implications for large-scale restoration	1999	{"Harwell, MC","Orth, RJ"}	{"Management or Restoration"}
1975118	An examination of photoacclimatory responses of Zostera marina transplants along a depth gradient for transplant-site selection in a disturbed estuary	2013	{"Kim, Jae Woo","Kim, Jong-Hyeob","Kim, Seung Hyeon","Lee, Kun-Seop","Li, Wen-Tao"}	{"Management or Restoration"}
1975002	Response of the microbial community to environmental change during seagrass transplantation	2013	{"Cebrian, Just","Christiaen, Bart","McDonald, Ashley","Ortmann, Alice C."}	{"Management or Restoration"}
1977502	The influence of salinity on seagrass growth, survivorship, and distribution within Biscayne Bay, Florida: Field, experimental, and modeling studies	2003	{"Cropper, WP","Lirman, D"}	{"Management or Restoration"}
1974354	A meta-analysis reveals a positive correlation between genetic diversity metrics and environmental status in the long-lived seagrass Posidonia oceanica	2015	{"Jahnke, Marlene","Olsen, Jeanine L.","Procaccini, Gabriele"}	{"Management or Restoration"}
1974113	Light Penetration Ability Assessment of Satellite Band for Seagrass Detection Using Landsat 8 OLI Satellite Data	2016	{"Apduhan, BO","BE Gervasi, O","Hashim, Mazlan","Misbari, Syarifuddin","Misra, S","Murgante, B","Rocha, AMAC","Stankova, E","Tanier, D","Torre, CM","Wang, S"}	{"Management or Restoration"}
1975964	Restoration of Cymodocea nodosa seagrass meadows through seed propagation: germination in vitro, seedling culture and field transplants	2010	{"Garcia-Jimenez, Pilar","Gonzalez-Henriquez, Nieves","Robaina, Rafael R.","Zarranz, Maite E."}	{"Management or Restoration"}
1977495	Influence of spacing on mechanically transplanted seagrass survival in a high wave energy regime	2003	{"Dyhrberg, R","Paling, EI","Phillips, J","Wheeler, KD","van Keulen, M"}	{"Management or Restoration"}
1974474	Microbial community structure and dynamics in restored subtropical seagrass sediments	2015	{"Bourque, Amanda S.","Fourqurean, James W.","Vega-Thurber, Rebecca"}	{"Management or Restoration"}
1974239	Evaluation of substrates for constructing beds for the marine macrophyte Zostera marina L.	2015	{"Hizon-Fradejas, Amelia B.","Nakai, Satoshi","Nakano, Yoichi","Nishijima, Wataru"}	{"Management or Restoration"}
1974192	The impact of 85 years of coastal development on shallow seagrass beds (Posidonia oceanica L. (Delile)) in South Eastern France: A slow but steady loss without recovery	2015	{"Boissery, P.","Deter, J.","Freschet, E.","Guilbert, A.","Holon, F."}	{"Management or Restoration"}
1974101	Comparing Productivity and Biogeochemistry of Native and Transplanted Thalassia testudinum and Halodule beaudettei in Big Lagoon, Florida, USA	2016	{"Caffrey, Jane M.","Head, Marie E.","Hester, Chelsea M.","Langsten, Holly","Linder, Samantha","Manor, Ellen","Norman, Joel","Sartory, Lindsay","Smith, Heather M."}	{"Management or Restoration"}
1975917	Large-Scale Zostera marina (eelgrass) Restoration in Chesapeake Bay, Maryland, USA. Part I: A Comparison of Techniques and Associated Costs	2010	{"Busch, Kathryn E.","Golden, Rebecca R.","Karrh, Lee P.","Lewandowski, Mark J.","Naylor, Michael D.","Parham, Thomas A."}	{"Management or Restoration"}
1975878	The possible origin of Zostera noltii in the Canary Islands and guidelines for restoration	2010	{"Diekmann, O. E.","Gil-Rodriguez, C.","Gouveia, L.","Perez, J. A.","Serrao, E. A."}	{"Management or Restoration"}
1975016	Evaluating eelgrass site quality by the settlement, performance, and survival of a marine fish	2013	{"Anderson, Todd W.","Edwards, Matthew S.","Jones, Cohn L."}	{"Management or Restoration"}
1974461	Macro and micro nutrients of tropical seagrasses, Halophila ovalis, H. spinulosa and Halodule uninervis in Johore, Malaysia	2015	{"Harah, Muta Z.","Hazma, Wan W. N.","Natrah, F. M., I","Sidik, Japar B."}	{"Non Zostera"}
1975845	Successful Eelgrass (Zostera marina) Restoration in a Formerly Eutrophic Estuary (Boston Harbor) Supports the Use of a Multifaceted Watershed Approach to Mitigating Eelgrass Loss	2010	{"Evans, N. Tay","Ford, Kathryn H.","Leschen, Alison S."}	{"Management or Restoration"}
1975751	Response of Posidonia oceanica growth to dredging effects of different magnitude	2011	{"Badalamenti, Fabio","Benedetti-Cecchi, Lisandro","Di Carlo, Giuseppe"}	{"Management or Restoration"}
1975088	Use of Posidonia oceanica seedlings from beach-cast fruits for seagrass planting	2013	{"Celdran, David","Marin, Arnaldo","Terrados, Jorge"}	{"Management or Restoration"}
1974171	I-C-SEA Change: A participatory tool for rapid assessment of vulnerability of tropical coastal communities to climate change impacts	2015	{"Alino, Porfirio M.","Borja-del Rosario, Roselle","Cabrera, Olivia C.","David, Laura T.","Espana, Norievill B.","Geronimo, Rollan C.","Licuanan, Wilfredo Y.","Mamauag, Samuel S.","Maria, Ma. Yvainne Y. Sta.","Martinez, Renmar Jun S.","Quibilan, Miledel Christine C.","Samson, Maricar S.","Siringan, Fernando P.","Villanoy, Cesar L."}	{"Management or Restoration"}
1976576	Macrograzers strongly influence patterns of epiphytic assemblages in seagrass meadows	2007	{"Alcoverro, Teresa","Martinez-Crego, Begona","Perez, Marta","Prado, Patricia","Romero, Javier","Verges, Adriana"}	{"Non Zostera"}
1976564	Positive feedbacks in seagrass ecosystems: Implications for success in conservation and restoration	2007	{"Bouma, Tjeerd J.","Geerling, Gertjan W.","Smolders, Alfons J. P.","van Katwijk, Marieke M.","van Nes, Egbert H.","van der Heide, Tjisse"}	{"Management or Restoration"}
1976515	Modelling nutrient mass balance in a temperate meso-tidal estuary: Implications for management	2008	{"Flindt, Mogens Rene","Magalhaes Neto, Joao","Marques, Joao Carlos","Pardal, Miguel Angelo"}	{"Management or Restoration"}
1974688	Restoring Eelgrass (Zostera marina L.) Habitats Using a Simple and Effective Transplanting Technique	2014	{"Liu, Bingjian","Liu, Peng","Liu, Xujia","Wang, Feng","Yang, Hongsheng","Zhang, Xiaomei","Zhou, Yi"}	{"Management or Restoration"}
1974637	An Ecosystem-Based Approach to Assess the Status of a Mediterranean Ecosystem, the Posidonia oceanica Seagrass Meadow	2014	{"Astruch, Patrick","Ballesteros, Enric","Bellan-Santini, Denise","Blouet, Sylvain","Bonhomme, Patrick","Boudouresque, Charles F.","Feunteun, Eric","Harmelin-Vivien, Mireille","Pastor, Jeremy","Pergent, Gerard","Pergent-Martini, Christine","Personnic, Sebastien","Poggiale, Jean-Christophe","Renaud, Florent","Ruitton, Sandrine","Thibault-Botha, Delphine","Thibaut, Thierry"}	{"Management or Restoration"}
1974732	Rehabilitating Seagrass by Facilitating Recruitment: Improving Chances for Success	2014	{"Collings, Greg J.","Irving, Andrew D.","Tanner, Jason E."}	{"Management or Restoration"}
1974122	Remote Sensing of Submerged Aquatic Vegetation	2016	{"BE Finkl, CW","Klemas, Victor V.","Makowski, C"}	{"Management or Restoration"}
1972640	Table_1_Estimating the Potential Blue Carbon Gains From Tidal Marsh Rehabilitation: A Case Study From South Eastern Australia.DOCX	2020	{"Carnell, Paul E.","De Paula Costa, Micheli Duarte","Gulliver, Anne","Macreadie, Peter I.","Masque, Pere","Trevathan-Tackett, Stacey M."}	{"Management or Restoration"}
1978017	Hydrological and oceanographic considerations for integrated coastal zone management in southern Belize	1999	{"Heyman, WD","Kjerfve, B"}	{"Management or Restoration"}
1974653	Distribution, structure and function of Nordic eelgrass (Zostera marina) ecosystems: implications for coastal management and conservation	2014	{"Baden, Susanne","Bockelmann, Anna-Christina","Bostrom, Christoffer","Dromph, Karsten","Fredriksen, Stein","Gustafsson, Camilla","Krause-Jensen, Dorte","Moeller, Tiia","Nielsen, Soren Laurentius","Olesen, Birgit","Olsen, Jeanine","Pihl, Leif","Rinde, Eli"}	{"Management or Restoration"}
1976377	Interactions between seagrass and its epiphytic algae: A review	2008	{"Huang Xiao-ping","Zhang Jing-ping"}	{"Review or Book"}
1978731	Vertical gradients in growth of juvenile bay scallops, Argopecten irradians, in relation to flow and seston characteristics in eelgrass meadows	1993	{"Borrero, Francisco U.","Bricelj, V. Monica"}	{Conference}
1977882	Review of nitrogen and phosphorus metabolism in seagrasses	2000	{"Burkholder, JM","Touchette, BW"}	{"Review or Book"}
1976163	Ecosystem health assessment using the Mediterranean seagrass Posidonia oceanica: A review	2009	{"Montefalcone, Monica"}	{"Management or Restoration"}
1976051	Facilitating recruitment of Amphibolis as a novel approach to seagrass rehabilitation in hydrodynamically active waters	2010	{"Hoare, Sonja L.","Tanner, Jason E.","Wear, Rachel J."}	{"Management or Restoration"}
1975695	Recovery from the impact of light reduction on the seagrass Amphibolis griffithii, insights for dredging management	2011	{"Lavery, Paul S.","McMahon, Kathryn","Mulligan, Michael"}	{"Management or Restoration"}
1972625	A Spatial Prioritisation Exercise for Marine Spatial Planning Implementation within MPA MT105 of the Maltese Islands	2020	{"Deidun, Alan","Fenech, Daniel","Gauci, Adam"}	{"Management or Restoration"}
1976662	Effects of the loess coating on seed germination and seedling growths of the eelgrass, Zostera marina	2007	{"Lee, Kun-Seop","Park, Jung-Im"}	{"Management or Restoration"}
1976227	Evaluation of a mechanical seed planter for transplanting Zostera marina (eelgrass) seeds	2009	{"Granger, Steven","Marion, Scott R.","Orth, Robert J.","Traber, Michael"}	{"Management or Restoration"}
1976226	Photosynthetic recovery of transplanted Posidonia sinuosa, Western Australia	2009	{"Horn, Lotte E.","Paling, Eric I.","van Keulen, Mike"}	{"Management or Restoration"}
1975507	Restoration of Seagrass Habitat in New Jersey, United States	2012	{"Bologna, Paul A. X.","Sinnema, Michael S."}	{"Management or Restoration"}
1972704	Taking advantage of seagrass recovery potential to develop novel and effective meadow rehabilitation methods	2019	{"Alagna, Adriana","Badalamenti, Fabio","D'Anna, Giovanni","Fernandez, Tomas Vega","Gresta, Martina","Musco, Luigi","Pierozzi, Natalia"}	{"Management or Restoration"}
1978982	DEVELOPMENT OF THE TECHNIQUES FOR MARINE MACROPHYTE BED CREATION IN THE COASTAL ZONE NEAR A POWER PLANT THE INFLUENCE OF ENVIRONMENTAL FACTORS ON THE FLOWERING SHOOT FORMATION OF ZOSTERA-MARINA	1987	{"HONDA M","KIKUCH K","SATO S"}	{"Not accessible","Technical Report"}
1973653	Land use is a better predictor of tropical seagrass condition than marine protection	2017	{"Croll, Don","Fortes, Miguel D.","Quiros, T. E. Angela L.","Raimondi, Peter","Tershy, Bernie"}	{"Management or Restoration"}
1973650	Can we manage coastal ecosystems to sequester more blue carbon?	2017	{"Atwood, Trisha B.","Connolly, Rod M.","Kelleway, Jeffrey J.","Macreadie, Peter I.","Nielsen, Daniel A.","Petrou, Katherina","Ralph, Peter J.","Seymour, Justin R.","Thomson, Alexandra C. G.","Trevathan-Tackett, Stacey M."}	{"Management or Restoration"}
1973581	Comparing Automated Classification and Digitization Approaches to Detect Change in Eelgrass Bed Extent during Restoration of a Large River Delta	2017	{"Barham, Jesse","Davenport, Anna E.","Davis, Jerry D.","Ellings, Christopher S.","Grossman, Eric E.","Takekawa, John Y.","Woo, Isa"}	{"Management or Restoration"}
1973563	Marine protected areas increase temporal stability of community structure, but not density or diversity, of tropical seagrass fish communities	2017	{"Alonso Aller, Elisa","Eklof, Johan S.","Jiddawi, Narriman S."}	{"Management or Restoration"}
1976015	Ecological and Human Use Information for Twenty Areas on Atlantic Coast of Nova Scotia in Support of Conservation Planning	2010	{"Allard, K.","Fenton, D.","Ford, J.","Gromack, A. G.","Johnston, S."}	{"Management or Restoration"}
1974489	Harnessing the climate mitigation, conservation and poverty alleviation potential of seagrasses: prospects for developing blue carbon initiatives and payment for ecosystem service programmes	2015	{"Hejnowicz, Adam P.","Huxham, Mark R.","Kennedy, Hilary","Rudd, Murray A."}	{"Management or Restoration"}
1978638	PLURIANNUAL ANALYSIS OF THE RESERVE EFFECT ON ICHTHYOFAUNA IN THE SCANDOLA NATURAL RESERVE (CORSICA, NORTHWESTERN MEDITERRANEAN)	1994	{"FRANCOUR, P"}	{"Management or Restoration"}
1974096	Setting an ecological baseline prior to the bottom-up establishment of a marine protected area in Santorini Island, Aegean Sea	2016	{"Gerakaris, V.","Giakoumi, S.","Issaris, Y.","Salomidi, M.","Sini, M.","Tsiamis, K."}	{"Management or Restoration"}
1973962	Spatially explicit feedbacks between seagrass meadow structure, sediment and light: Habitat suitability for seagrass growth	2016	{"Carr, Joel A.","D'Odorico, Paolo","McGlathery, Karen J.","Wiberg, Patricia L."}	{"Management or Restoration"}
1973459	Meta-Analysis of Reciprocal Linkages between Temperate Seagrasses and Waterfowl with Implications for Conservation	2017	{"Boyer, Katharyn E.","Cusson, Mathieu","Eklof, Johan S.","Henry, Amy K.","Hereu, Clara M.","Jorgensen, Pablo","Kiriakopolos, Stephanie L.","Kollars, Nicole M.","Reynolds, Pamela L.","Ruesink, Jennifer L.","Tomas, Fiona","Turner, Mo S.","Whalen, Matthew A."}	{"Review or Book"}
1972856	The status of coral reefs and seagrass meadows in the Kep Archipelago, Cambodia.	2019	{"Ferber, Paul","Haissoune, Amick","Reid, Alex E. A."}	{"Management or Restoration"}
1973186	Seagrass recovery after fish farm relocation in the eastern Mediterranean	2018	{"Antoniou, Charalampos","Attrill, Martin J.","Hall-Spencer, Jason M.","Kleitou, Periklis","Kletou, Demetris","Savva, Ioannis"}	{"Non Zostera"}
1973893	Shifting paradigms in coastal restoration: Six decades' lessons from China	2016	{"Cui, Baoshan","He, Qiang","Liu, Zezheng"}	{"Management or Restoration"}
1976280	Changes in Productivity and Morphological Characteristicsof Zostera marina Transplants	2009	{"Kim, Jeong-Bae","Lee, Kun-Seop","Li, Wentao","Park, Jung-Im"}	{"Management or Restoration"}
1973073	The Science and Policy of the Verified Carbon Standard Methodology for Tidal Wetland and Seagrass Restoration	2018	{"Crooks, Stephen","Emmer, Igino M.","Emmett-Mattox, Stephen","McGlathery, Karen","Megonigal, J. Patrick","Myers, Doug","Needelman, Brian A.","Oreska, Matthew P. J."}	{"Management or Restoration"}
1976186	The ecological role of bivalve shellfish aquaculture in the estuarine environment: A review with application to oyster and clam culture in West Coast (USA) estuaries	2009	{"Dumbauld, Brett R.","Ruesink, Jennifer L.","Rumrill, Steven S."}	{"Management or Restoration","Review or Book"}
1976166	Modeling the Effects of Oyster Reefs and Breakwaters on Seagrass Growth	2009	{"Chen, Shih-Nan","Hood, Raleigh R.","Koch, Evamaria W.","Newell, Roger I. E.","North, Elizabeth W.","Shi, Fengyan","Smith, Katharine A."}	{"Non Zostera"}
1973298	Seagrass mapping in Greek territorial waters using Landsat-8 satellite images	2018	{"Katsanevakis, Stelios","Makri, Despina","Papakonstantinou, Apostolos","Stoupas, Nikolaos","Topouzelis, Konstantinos"}	{"Management or Restoration"}
1977246	Modeling seagrass density and distribution in response to changes in turbidity stemming from bivalve filtration and seagrass sediment stabilization	2004	{"Koch, EW","Newell, RIE"}	{"Non Zostera"}
1973907	Quantifying the influence of small omnivorous fishes on seagrass epiphyte load	2016	{"Burfeind, D. D.","Gilby, B. L.","Henderson, C. J.","Tibbetts, I. R."}	{"No Stressor/Restoration"}
1976197	The structural and histochemical analyses and chemical characters of the cuticle and epidermal walls of cotyledon in ungerminated seeds of Zostera marina L.	2009	{"Kawasaki, Yoko","Maegawa, Miyuki","Sugiura, Hiroyuki","Suzuki, Tomoko"}	{"No Stressor/Restoration"}
1975756	Carbon, nitrogen and phosphorus dynamics in nine sub-systems of the Sylt-Romo Bight ecosystem, German Wadden Sea	2011	{"Asmus, Harald","Asmus, Ragnhild","Baird, Dan"}	{"No Stressor/Restoration"}
1977048	A multivariate assessment of coastal eutrophication. Examples from the Gulf of Finland, northern Baltic Sea	2005	{"Bonsdorff, E","Lonnroth, M","Lundberg, C","von Numers, M"}	{"No Stressor/Restoration"}
1976927	Plant-herbivore interactions in seagrass meadows	2006	{"Heck, KL","Valentine, JF"}	{"Review or Book"}
1975071	Changes in Nutrient Biogeochemistry in Response to the Regression of Zostera noltii Meadows in the Arcachon Bay (France)	2013	{"Anschutz, Pierre","Charbonnier, Celine","Deborde, Jonathan","Deflandre, Bruno","Delgard, Marie-Lise","Richard, Marion"}	{"No Stressor/Restoration"}
1974039	Secondary Productivity and Habitat Composition of Eelgrass Beds in a Southern California Marine Protected Area	2016	{"Ginsburg, D. W.","Obaza, A. K.","Tanner, R. L."}	{Conference}
1973010	Definition of Environmental Units of Analysis: alternative method as a basis for environmental zoning of marine-coastal ecosystems	2019	{"Cecilia Lopez-Rodriguez, Angela","Javier Ospino-Sepulveda, Leonardo"}	{"Management or Restoration"}
1976701	Carbon, nitrogen and phosphorus fluxes in four sub-tropical estuaries of northern KwaZulu-Natal: Case studies in the application of a mass balance approach	2007	{"Wepener, V."}	{"Management or Restoration"}
1973264	A predictive model based on multiple coastal anthropogenic pressures explains the degradation status of a marine ecosystem: Implications for management and conservation	2018	{"Bockel, Thomas","Boissery, Pierre","Descamp, Pierre","Deter, Julie","Holon, Florian","Marre, Guilhem","Mouquet, Nicolas","Parravicini, Valeriano","Tribot, Anne-Sophie"}	{"Non Zostera"}
1975858	Management of natural Ulva spp. blooms in San Quintin Bay, Baja California: Is it justified?	2010	{"Carriquiry, Jose D.","Ibarra-Obando, Silvia E.","Jorgensen, Pablo"}	{"Management or Restoration","Review or Book"}
1975046	An allometric method for measuring leaf growth in eelgrass, Zostera marina, using leaf length data	2013	{"Echavarria-Heras, Hector","Leal-Ramirez, Cecilia","Solana-Arellano, Elena","Vizcaino, Ernesto Franco"}	{"Management or Restoration"}
1973950	Predator-prey interactions in a restored eelgrass ecosystem: strategies for maximizing success of reintroduced bay scallops (Argopecten irradians)	2016	{"Lefcheck, Jonathan S.","Luckenbach, Mark W.","Orth, Robert J.","Schmitt, Erika L."}	{"Non Zostera","No Stressor/Restoration"}
1973853	Accelerating Tropicalization and the Transformation of Temperate Seagrass Meadows	2016	{"Harvey, Euan S.","Heck, Kenneth L., Jr.","Hyndes, Glenn A.","Kendrick, Gary A.","Lavery, Paul S.","Mcmahon, Kathryn","Orth, Robert J.","Pearce, Alan","Vanderklift, Mathew","Verges, Adriana","Wernberg, Thomas","Whiting, Scott","Wilson, Shaun"}	{"Review or Book"}
1972559	Linking ecosystem condition and landscape context in the conservation of ecosystem multifunctionality	2020	{"Connolly, Rod M.","Gaines, Lucy A. Goodridge","Gilby, Ben L.","Henderson, Christopher J.","Jones, Tyson R.","Olds, Andrew D.","Schlacher, Thomas A."}	{"Management or Restoration"}
1972814	Recent trend reversal for declining European seagrass meadows	2019	{"Alcoverro, Teresa","Auby, Isabelle","Cabaco, Susana","Cook, Kevan","Duarte, Carlos M.","Fernandez-Torquemada, Yolanda","Fournier, Jerome","Jankowska, Emilia","Krause-Jensen, Dorte","Lucas Perez-Llorens, Jose","Marba, Nuria","Montefalcone, Monica","Moy, Frithjof E.","Perez, Marta","Pergent, Gerard","Roca, Guillem","Romero, Javier","Ruiz, Juan M.","Sanchez-Lizaso, Jose L.","Santos, Rui","Seglar A…	{"Management or Restoration","Review or Book"}
1972871	Fingerprinting Blue Carbon: Rationale and Tools to Determine the Source of Organic Carbon in Marine Depositional Environments	2019	{"Duarte, Carlos M.","Geraldi, Nathan R.","Kaal, Joeri","Kennedy, Hilary","Krause-Jensen, Dorte","Lavery, Paul S.","Lovelock, Catherine E.","Macreadie, Peter","Ortega, Alejandra","Pace, Michael L.","Serrano, Oscar"}	{"Management or Restoration","Review or Book"}
2545941	Using Propagules to Restore Coastal Marine Ecosystems	2020	{"Doropoulos, Christopher","Gorman, Daniel","Leal, Ines","Minne, Antoine J. P.","Statton, John","Steven, Andrew D. L.","Vanderklift, Mathew A.","Wernberg, Thomas"}	{"No Stressor/Restoration"}
2100150	Overexpression of Seagrass Nucleotide Exchange Factor Gene ZjFes1 Enhances Heat Tolerance in Transgenic Arabidopsis	2020	{"Chen, Siting","Qiu, Guanglong"}	{"Non Zostera","No Stressor/Restoration"}
2545925	Restoration of seagrass habitat leads to rapid recovery of coastal ecosystem services	2020	{"Aoki, Lillian","Lefcheck, Jonathan S.","Luckenbach, Mark W.","Lusk, Bo","McGlathery, Karen S.","Moore, Kenneth A.","Oreska, Matthew P. J.","Orth, Robert J.","Snyder, Richard","Wilcox, David J."}	{"No Stressor/Restoration"}
1979143	CONTROL OF MICROBIAL-GROWTH AND OF AMPHIPOD GRAZING BY WATER-SOLUBLE COMPOUNDS FROM LEAVES OF ZOSTERA-MARINA	1982	{"HARRISON, PG"}	{"No Stressor/Restoration"}
1978013	Geochemistry of Florida Bay sediments: Nutrient history at five sites in eastern and central Florida Bay	1999	{"Bates, AL","Boylan, A","Corum, M","Hedgman, C","Holmes, CW","Kendall, C","Lerch, HE","Marot, M","Orem, WH","Silva, SR"}	{"No Stressor/Restoration"}
1977953	The ecological and social basis for management of a Red Sea marine-protected area	2000	{"Gladstone, W"}	{"No Stressor/Restoration"}
1978537	SEAGRASS LOSS ASSOCIATED WITH BOAT MOORINGS AT ROTTNEST-ISLAND, WESTERN-AUSTRALIA	1995	{"HASTINGS, K","HESP, P","KENDRICK, GA"}	{"No Stressor/Restoration"}
2545947	Translating globally threatened marine species information into regional guidance for the Gulf of Mexico	2020	{"Carpenter, Kent","Linardich, Christi","Polidoro, Beth","Ralph, Gina","Saul, Steven","Strongin, Kyle"}	{"Non Zostera"}
1979144	AMMONIUM REGENERATION AND ASSIMILATION IN EELGRASS (ZOSTERA-MARINA) BEDS	1982	{"HATTORI, A","IIZUMI, H","MCROY, CP"}	{"No Stressor/Restoration"}
1978303	Investigating the management potential of a seagrass model through sensitivity analysis and experiments	1997	{"Fong, P","Harwell, MC","Jacobson, ME","Lirman, D","Mescher, MC"}	{"No Stressor/Restoration"}
2545923	Scaling up: Predicting the Impacts of Climate Change on Seagrass Ecosystems	2020	{"Zimmerman, Richard C."}	{"Non Zostera"}
1975020	Integrating Vulnerability Into Estuarine Conservation Planning: Does the Data Treatment Method Matter?	2013	{"Gladstone, William","Shokri, Mohammad Reza"}	{"Management or Restoration"}
1977937	Coastal eutrophication and agriculture: Contributions and solutions	2000	{"BE Balazs, E","Boesch, DF","Brinsfield, RB","Galante, E","Lynch, JM","Schepers, JS","Toutant, JP","Werner, D","Werry, PAT"}	{"Management or Restoration"}
1977879	Operationalizing sustainability: Management and risk assessment of land-derived nitrogen loads to estuaries	2000	{"Cebrian, J","Cole, ML","Hauxwell, J","Kroeger, KD","Tomasky, G","Valiela, I"}	{"Management or Restoration"}
1977573	Long-distance dispersal potential in a marine macrophyte	2002	{"Harwell, MC","Orth, RJ"}	{"No Stressor/Restoration"}
1979328	THE RESTORATION OF EELGRASS-M IN THE WHITE SEA	1970	{"VEKHOV V N"}	{"Management or Restoration"}
1977516	Impact of hydrodynamics on development and morphology of intertidal seagrasses in the Wadden Sea	2003	{"Asmus, H","Schanz, A"}	{"Management or Restoration"}
1976807	A global crisis for seagrass ecosystems	2006	{"Carruthers, Tim J. B.","Dennison, William C.","Duarte, Carlos M.","Fourqurean, James W.","Heck, Kenneth L., Jr.","Hughes, A. Randall","Kendrick, Gary A.","Kenworthy, W. Judson","Olyarnik, Suzanne","Orth, Robert J.","Short, Frederick T.","Waycott, Michelle","Williams, Susan L."}	{Review}
1976577	Effects of irradiance, temperature, and nutrients on growth dynamics of seagrasses: A review	2007	{"Kim, Young Kyun","Lee, Kun-Seop","Park, Sang Rul"}	{Review}
1976575	Introduced species in seagrass ecosystems: Status and concerns	2007	{"Williams, Susan L."}	{Review}
1972804	Seagrass and hydrographic data for the Mediterranean Sea	2019	{"Arampatzis, Avi","Effrosynidis, Dimitrios","Sylaios, Georgios"}	{"Management or Restoration"}
1972607	The gathering storm: optimizing management of coastal ecosystems in the face of a climate-driven threat	2020	{"Bouma, Tjeerd J.","Hanley, Mick E.","Mossman, Hannah L."}	{Review}
1974250	Error, Power, and Blind Sentinels: The Statistics of Seagrass Monitoring	2015	{"Bakran-Petricioli, Tatjana","Kruschel, Claudia","Petricioli, Donat","Schultz, Stewart T."}	{"Management or Restoration"}
1974071	Zostera marina meadows from the Gulf of California: conservation status	2016	{"Basurto, Xavier","Lopez-Calderon, Jorge M.","Meling, Alf","Riosmena-Rodriguez, Rafael","Torre, Jorge"}	{"Management or Restoration"}
1979064	DEVELOPMENT OF TECHNIQUES FOR MARINE MACROPHYTE BED CREATION IN THE COASTAL ZONE NEAR A POWER PLANT 1. TRANSPLANTING TIME OF ZOSTERA-MARINA	1984	{"IITSUKA T","KAWASAKI Y","TERAWAKI T"}	{"Management or Restoration"}
1977737	Reduced genetic diversity in eelgrass transplantations affects both population growth and individual fitness	2001	{"Williams, SL"}	{"Management or Restoration"}
1977549	Settlement and density of juvenile fish assemblages in natural, Zostera capricorni (Zosteraceae) and artificial seagrass beds	2003	{"Booth, DJ","Upston, J"}	{"Management or Restoration"}
1978680	WATER-QUALITY ASSOCIATED WITH SURVIVAL OF SUBMERSED AQUATIC VEGETATION ALONG AN ESTUARINE GRADIENT	1993	{"STAVER, KW","STAVER, LW","STEVENSON, JC"}	{"Management or Restoration"}
1978604	AN IMPROVEMENT OF THE ZIEMAN LEAF MARKING TECHNIQUE FOR ZOSTERA-MARINA GROWTH AND PRODUCTION ASSESSMENT	1994	{"BOUDOURESQUE, CF","IBARRAOBANDO, SE"}	{"No Stressor/Restoration"}
1977842	Capacity building for protected areas management: The CaMPAM approach.	2001	{"BA Anonymous","Gardner, Lloyd","Vanzella-Khouri, Alessandra"}	{"Management or Restoration"}
1975033	Integrating Indian Remote Sensing Multi-spectral Satellite and Field Data to Estimate Seagrass Cover Change in the Andaman and Nicobar Islands, India	2013	{"Dilipan, Elangovan","Paulose, Nobi Elavumkudi","Thangaradjou, Thirunavukarassu"}	{"Management or Restoration"}
1975022	Seagrass Quality Index (SQI), a Water Framework Directive compliant tool for the assessment of transitional and coastal intertidal areas	2013	{"Barria, Pablo","Barroso, Dimitri V.","Neto, Joao M."}	{"Management or Restoration"}
1975015	Variability in herbivory in subtropical seagrass ecosystems and implications for seagrass transplanting	2013	{"Bourque, Amanda S.","Fourqurean, James W."}	{"Management or Restoration"}
1974907	Long-term seed storage and viability of Zostera marina	2013	{"Dooley, Frederick D.","Van Volkenburgh, Elizabeth","Wyllie-Echeverria, Sandy"}	{"Management or Restoration"}
1974821	A long-term survey of Posidonia oceanica fish assemblages in a Mediterranean Marine Protected Area: emphasis on stability and no-take area effectiveness	2014	{"Francour, Patrice","Seytre, Catherine"}	{"Management or Restoration"}
1975921	Evaluating a Large-Scale Eelgrass Restoration Project in the Chesapeake Bay	2010	{"Busch, Kathryn","Golden, Rebecca R.","Hunter, Sarah","Karrh, Lee","Lewandowski, Mark","Naylor, Mike","Parham, Thomas","Reel, Justin","Rybicki, Nancy","Schenk, Edward","Tanner, Christopher"}	{"Management or Restoration"}
1977104	Recovery of deep Posidonia oceanica meadows degraded by trawling	2005	{"Bayle, JT","Gonzalez-Correa, JM","Ruiz, JM","Sanchez-Jerez, P","Sanchez-Lizasa, JL","Valle, C"}	{"Management or Restoration"}
1976361	Evaluation of aboveground and belowground biomass recovery in physically disturbed seagrass beds	2008	{"Di Carlo, Giuseppe","Kenworthy, W. Judson"}	{"Management or Restoration"}
1977335	Nitrogen dynamics in Posidonia oceanica cuttings: implications for transplantation experiments	2004	{"Bouquegneau, JM","Eisinger, M","Gobert, S","Lepoint, G","Paster, M","Vangeluwe, D","van Treeck, P"}	{"Management or Restoration"}
1975922	Factors Influencing Seedling Establishment Rates in Zostera marina and Their Implications for Seagrass Restoration	2010	{"Marion, Scott R.","Orth, Robert J."}	{"Management or Restoration"}
1975852	Restoration of Cymodocea nodosa (Uchria) Ascherson seagrass meadows through seed propagation: seed storage and influences of plant hormones and mineral nutrients on seedling growth in vitro	2010	{"Garcia-Jimenez, Pilar","Gonzalez-Henriquez, Nieves","Robaina, Rafael R.","Zarranz, Maite E."}	{"Management or Restoration"}
1975382	Biodiversity and habitat mapping of Menorca Channel (western Mediterranean): implications for conservation	2012	{"Barbera, C.","Diaz-Valdes, M.","Grau, A. M.","Massuti, E.","Moranta, J.","Ordines, F.","Ramon, M.","de Mesa, A."}	{"Management or Restoration"}
1974130	Habitat suitability analysis of eelgrass Zostera marina L. in the subtidal zone of Xiaoheishan Island	2016	{"Guan Shuguang","Wang Qixiang","Yu Daode","Zhao Wenxi","Zhou Jian"}	{"Management or Restoration"}
1977405	A comparison of issues and management approaches in Moreton Bay, Australia and Chesapeake bay, USA	2004	{"BE Wong, MH","Carruthers, TB","Dennison, WC","Glibert, PM","Thomas, JE"}	{"Management or Restoration"}
1979022	COMPARISON OF SURVIVAL AND GROWTH BETWEEN RESTORED SEAGRASSES IN TROPICS (JAMAICA) AND SUBTROPICS (FLORIDA)	1985	{"THORHAUG, A"}	{"Management or Restoration"}
1979219	BIOMASS AND PRODUCTION OF EELGRASS (ZOSTERA-MARINA L) IN THE ORESUND, DENMARK	1980	{"BORUM, J","WIUMANDERSEN, S"}	{"Not accessible"}
1978182	Influence of sediment on pelagic carbon and nitrogen turnover in a shallow Danish estuary	1998	{"Jorgensen, NOG","Kroer, N","Middelboe, M","Pakulski, D"}	{"No Stressor/Restoration"}
1974921	Ecoregion-Based Conservation Planning in the Mediterranean: Dealing with Large-Scale Heterogeneity	2013	{"Abdulla, Ameer","Beher, Jutta","Cinar, Melih Ertan","Dendrinos, Panagiotis","Gerovasileiou, Vasilis","Giakoumi, Sylvaine","Gucu, Ali Cemal","Jaklin, Andrej","Karamanlidis, Alexandros A.","Katsanevakis, Stelios","Mazor, Tessa","Panayotidis, Panayotis","Possingham, Hugh P.","Rodic, Petra","Sini, Maria","Taskin, Ergun","Voultsiadou, Eleni","Webster, Chloe","Zenetos, Argyro"}	{"Management or Restoration"}
1974773	Autochthonous Seagrasses	2014	{"BE Goffredo, S","Conde-Alvarez, Rafael","Dubinsky, Z","Figueroa, Felix L.","Lucas Perez-Llorens, J.","Mercado, Jesus M.","Olive, Irene","Perez-Ruzafa, Angel","Vergara, Juan J."}	{"Review or Book"}
1974654	Genetic diversity in threatened Posidonia australis seagrass meadows	2014	{"Evans, Suzanna M.","Kendrick, Gary A.","Poore, Alistair G. B.","Sinclair, Elizabeth A.","Steinberg, Peter D.","Verges, Adriana"}	{"Management or Restoration"}
1977966	Observations on the regrowth of subaquatic vegetation following transplantation: A potential method to assess environmental health of coastal habitats	2000	{"BE Bortone, SA","Davis, MR","Davis, WP","Flemer, DA"}	{"Management or Restoration"}
1974627	Courage under fire: Seagrass persistence adjacent to a highly urbanised city-state	2014	{"Bouma, Tjeerd","Erftemeijer, Paul L. A.","McKenzie, Len J.","Todd, Peter A.","Yaakub, Siti Maryam"}	{"Non Zostera"}
1974504	Ecosystem responses to long-term nutrient management in an urban estuary: Tampa Bay, Florida, USA	2014	{"Greening, H.","Janicki, A.","Johansson, J. O. R.","Pribble, R.","Sherwood, E. T."}	{"Management or Restoration"}
1973922	Burial Duration and Frequency Influences Resilience of Differing Propagule Types in a Subtidal Seagrass, Posidonia australis	2016	{"Campbell, Marnie L."}	{"Management or Restoration"}
1978106	Integrating science and management on coastal marine protected areas in the Southern Gulf of Mexico	1999	{"Galaviz, JLR","Lara-Dominguez, AL","Lomeli, DJZ","Sanchez-Gil, P","Yanez-Arancibia, A","Zapata, GJV"}	{"Management or Restoration"}
1975074	Water quality variables as indicators in the restoration impact assessment of the north lagoon of Tunis, South Mediterranean	2013	{"Armi, Zina","Ben Maiz, Naceur","Shili, Abdessalem","Trabelsi, E. L. Bahri","Trabelsi-Annabi, Neila"}	{"Management or Restoration"}
1974950	Novel Seed Adaptations of a Monocotyledon Seagrass in the Wavy Sea	2013	{"Chen, Ching-Nen Nathan","Chiu, Shau-Ting","Soong, Keryea"}	{"Management or Restoration"}
1978565	CHANGING LIFE UNDER THE TIDES OF THE WADDEN SEA DURING THE 20TH-CENTURY	1994	{"REISE, K"}	{Conference}
1976119	Effects of a marine protected area on fish assemblage associated with Posidonia oceanica seagrass beds: temporal and depth variations	2009	{"Bayle-Sempere, J. T.","Valle, C."}	{"Management or Restoration"}
1975806	Management Case Study: Tampa Bay, Florida	2011	{"BE Wolanski, E","Greening, H. S.","McLusky, D","Morrison, G.","Yates, K. K."}	{"Management or Restoration"}
1975485	Seed addition facilitates eelgrass recovery in a coastal bay system	2012	{"Marion, Scott R.","Moore, Kenneth A.","Orth, Robert J.","Parrish, David B.","Wilcox, David J."}	{"Management or Restoration"}
1973874	Optimising Land-Sea Management for Inshore Coral Reefs	2016	{"Connolly, Rod M.","Gilby, Ben L.","Henderson, Christopher J.","Maxwell, Paul S.","Olds, Andrew D.","Rissik, David","Schlacher, Thomas A.","Schoeman, David S.","Stevens, Tim","Tibbetts, Ian R."}	{"Management or Restoration"}
1976799	Ecosystem Based Management: Linked-ecosystem modelling of the Great Barrier Reef	2007	{"BE Oxley, L","Gribble, Neil A.","Kulasiri, D"}	{"Management or Restoration"}
1973592	Population genetics information for the regional conservation of a tropical seagrass, Enhalus acoroides, around the Guimaras Strait, Philippines	2017	{"Arriesgado, Dan M.","Campos, Wilfredo L.","Lian, Chunlan","Matsuki, Yu","Nadaoka, Kazuo","Nakajima, Yuichi"}	{"Management or Restoration"}
1975977	Effect of salinity on growth and nutrient uptake of Ulva pertusa (Chlorophyta) from an eelgrass bed	2010	{"Choi, Tae Seob","Kang, Eun Ju","Kim, Ju-hyoung","Kim, Kwang Young"}	{"Non Zostera"}
1976801	Epiphytic Algae from Zostera marina (Eelgrass) populations of Maryland Coastal Bays	2007	{"Bensinger, Lesley","Mitra, Madhumi"}	{"Ghost citation"}
1973988	Method for ecological restoration of Zostera marina seagrass meadows, involves collecting seagrass branches, fixing on small stones, placing into repairing sea, naturally falling mature seeds, planting seedling and recovering meadows	NA	{"HAN X","JIN Y","ZHANG F","ZHANG W","ZHENG F"}	{"Ghost citation"}
1973656	Spatiotemporal dynamics of submerged macrophyte status and watershed exploitation in a Mediterranean coastal lagoon: Understanding critical factors in ecosystem degradation and restoration	2017	{"Baldi, Yoann","Derolez, Valerie","Etourneau, Sabrina","Garrido, Marie","Laugier, Thierry","Leoni, Vanina","Malet, Nathalie","Orsoni, Valerie","Pasqualini, Vanina","Rebillout, Patrick","Souchu, Philippe"}	{"Management or Restoration"}
1973622	Recruitment and Patch Establishment by Seed in the Seagrass Posidonia oceanica: Importance and Conservation Implications	2017	{"Balestri, Elena","Lardicci, Claudio","Vallerini, Flavia"}	{"Management or Restoration"}
1973561	Tampa Bay (Florida, USA) Documenting Seagrass Recovery since the 1980's and Reviewing the Benefits	2017	{"Greening, Holly S.","Johansson, J. O. Roger","Kaufman, Kristen","Raulerson, Gary E.","Sherwood, Edward T."}	{"Management or Restoration","Review or Book"}
1972547	A novel GIS-MCDA-based spatial habitat suitability model for Posidonia oceanica in the Mediterranean	2020	{"Bakirman, Tolga","Gumusay, Mustafa Umit"}	{"Management or Restoration"}
1972528	Where Marine Protected Areas would best represent 30% of ocean biodiversity	2020	{"Costello, Mark J.","Jayathilake, Dinusha","Kaschner, Kristin","Lundquist, Carolyn","Stephenson, Fabrice","Zhao, Qianshuo"}	{"Management or Restoration"}
1975692	Designing a network of marine reserves in the Mediterranean Sea with limited socio-economic data	2011	{"Giakoumi, Sylvaine","Grantham, Hedley S.","Kokkoris, Giorgos D.","Possingham, Hugh P."}	{"Management or Restoration"}
1975587	Projected Reorganization of Florida Bay Seagrass Communities in Response to the Increased Freshwater Inflow of Everglades Restoration	2011	{"Cosby, Bernard J.","Fourqurean, James W.","Herbert, Darrell Anthony","Perry, William B."}	{"Management or Restoration"}
1973544	The potential to integrate blue carbon into MPA design and management	2017	{"Eastwood, Erin","Fox, Matthew","Howard, Jennifer","McLeod, Elizabeth","Pidgeon, Emily","Thomas, Sebastian","Wenzel, Lauren"}	{"Management or Restoration"}
1973550	A six thousand-year record of climate and land-use change from Mediterranean seagrass mats	2017	{"Adame, Maria F.","Colas-Ruiz, Nieves R.","Lopez-Merino, Lourdes","Martinez Cortizas, Antonio","Mateo, Miguel A.","Serrano, Oscar"}	{"Management or Restoration"}
1972989	Modeling matter and energy flows in marine ecosystems using emergy and eco-exergy methods to account for natural capital value	2019	{"Buonocore, Elvira","Donnarumma, Luigia","Franzese, Pier Paolo","Picone, Flavio","Russo, Giovanni F."}	{"Management or Restoration"}
1972940	Open Coast Seagrass Restoration. Can We Do It? Large Scale Seagrass Transplants	2019	{"Boavida, Joana","Cunha, Alexandra H.","Fonseca, Mark","Goncalves, Emanuel J.","Paulo, Diogo","Serrao, Ester A."}	{"Management or Restoration"}
1972676	Modeling of suitable habitat for small-scale seagrass restoration in tropical ecosystems	2019	{"Kaewsrikhaw, Ratchanee","Prathep, Anchana","Rattanachot, Ekkalak","Stankovic, Milica"}	{"Management or Restoration"}
1976498	Marine protection and meadow size alter fish herbivory in seagrass ecosystems	2008	{"Alcoverro, Teresa","Farina, Simone","Prado, Patricia","Romero, Javier","Tomas, Fiona"}	{"Management or Restoration"}
1975329	Suppressing antagonistic bioengineering feedbacks doubles restoration success	2012	{"Bouma, Tjeerd J.","Faust, Cornelia","Giesen, Wim B. J. T.","Govers, Laura L.","Suykerbuyk, Wouter","de Jong, Dick J.","van Katwijk, Marieke M.","van der Heide, Tjisse"}	{"Management or Restoration"}
1973854	A Model Framework to Determine the Production Potential of Fish Derived from Coastal Habitats for Use in Habitat Restoration	2016	{"Dowd, Michael","Wong, Melisa C."}	{"Non Seagrass"}
1973301	Macro-grazer herbivory regulates seagrass response to pulse and press nutrient loading	2018	{"Bulleri, Fabio","Capocchi, Antonella","Fontanini, Debora","Mori, Giovanna","Nuccio, Caterina","Ravaglioli, Chiara"}	{"Management or Restoration"}
1972712	Assessing the environmental effectiveness of the Spanish Marine Reserve Network using remote sensing	2019	{"Garcia-Martinez, M. C.","Guillen, J.","Malak, D. Abdul","Merkohasanaj, M.","Rodriguez-Rodriguez, D.","Vargas-Yanez, M."}	{"Management or Restoration"}
1978528	Indicators of seagrass ecological condition: An assessment based on spatial and temporal changes	1995	{"BE Dyer, K. R.","Durako, Michael J.","Orth, R. J."}	{"Non Zostera"}
1973223	Environmental correlates of Thalassia hemprichii status descriptors: an evaluation of tools for diagnostic monitoring	2018	{"Ali, Suryati M.","Goh, Beverly P. L.","He, Jie","Sin, Tsai M."}	{"Non Zostera","Management or Restoration"}
1977013	Light and photosynthesis in seagrass meadows	2006	{"BE Larkum, AW","Duarte, CM","Orth, RJ","Zimmerman, Richard C."}	{"Review or Book"}
1977009	Nutrient dynamics in seagrass ecosystems	2006	{"Alcoverro, Teresa","BE Larkum, AW","Duarte, CM","Lee, Kun-Seop","Mateo, Miguel A.","Orth, RJ","Perez, Marta","Romero, Javier"}	{"Review or Book"}
1976002	The introduction of coastal infrastructure as a driver of change in marine environments	2010	{"Bulleri, Fabio","Chapman, Maura G."}	{"Management or Restoration"}
1975812	Chemical Introductions to the Systems: Diffuse and Nonpoint Source Pollution from Chemicals (Nutrients: Eutrophication)	2011	{"BE Wolanski, E","Kennish, M. J.","McLusky, D","de Jonge, V. N."}	{"Management or Restoration","Review or Book"}
1977934	Impact of nutrient inflows on Chesapeake Bay	2000	{"BE Sharpley, AN","Boynton, WR"}	{"Review or Book"}
1976304	Restructuring of benthic communities in eutrophic estuaries: lower abundance of prey leads to trophic shifts from omnivory to grazing	2009	{"Fox, Sophia E.","Heffner, Leanna","Olsen, Ylva S.","Teichberg, Mirta","Valiela, Ivan"}	{"No Stressor/Restoration"}
1976578	Impact of light limitation on seagrasses	2007	{"Collier, C. J.","Doblin, M. A.","Durako, M. J.","Enriquez, S.","Ralph, P. J."}	{"Review or Book"}
1976271	THE LAGOON OF VENICE	2009	{"BE Cecere, E","Curiel, Daniele","Izzo, G","Petrocelli, A","Rismondo, Andrea","Sfriso, A","Sfriso, Adriano"}	{"Review or Book"}
1977015	Decline and recovery of seagrass ecosystems - The dynamics of change	2006	{"BE Larkum, AW","Duarte, CM","Kendrick, Gary A.","McComb, Arthur J.","Orth, RJ","Walker, Diana I."}	{"Review or Book"}
1973332	Eelgrass as Valuable Nearshore Foraging Habitat for Juvenile Pacific Salmon in the Early Marine Period	2018	{"El-Sabaawi, Rana","Juanes, Francis","Kennedy, Laura A."}	{"Management or Restoration"}
1972681	Editorial: Research and Management of Eutrophication in Coastal Ecosystems	2019	{"Andersen, Jesper H.","Carstensen, Jacob","Holmer, Marianne","Krause-Jensen, Dorte","Richardson, Katherine"}	{"Management or Restoration"}
1976291	Macrophytes as habitat for fauna	2009	{"Christie, Hartvig","Fredriksen, Stein","Norderhaug, Kjell Magnus"}	{"No Stressor/Restoration"}
1973260	Climate Change Impacts on Seagrass Meadows and Macroalgal Forests: An Integrative Perspective on Acclimation and Adaptation Potential	2018	{"Cacador, Isabel","Duarte, Bernardo","Duarte, Carlos M.","Engelen, Aschwin H.","Jueterbock, Alexander","Marques, Joao C.","Martins, Irene","Matos, Ana R.","Pearson, Gareth A.","Reusch, Thorsten B. H.","Roleda, Michael Y.","Rosa, Rui","Serrao, Ester A."}	{"Review or Book"}
1976593	Biodiversity and ecosystem functioning in coastal lagoons: Does microbial diversity play any role?	2007	{"Danovaro, Roberto","Pusceddu, Antonio"}	{"Review or Book"}
1974112	Nitrogen stress in the marine environment: from scarcity to surfeit	2016	{"BE Solan, M","Berges, John A.","Whiteley, NM","Young, Erica B."}	{"Review or Book"}
1974052	Temporal distribution of intertidal macrozoobenthic assemblages in a Nanozostera noltii-dominated area (Lagoon of Venice)	2016	{"Cornello, M.","Magni, P.","Pessa, G.","Tagliapietra, D.","Zitelli, A."}	{"Non Zostera","No Stressor/Restoration"}
1973969	Sources of sediment carbon sequestered in restored seagrass meadows	2016	{"Emery, K. A.","Greiner, J. T.","McGlathery, K. J.","Wilkinson, G. M."}	{"No Stressor/Restoration"}
1974847	Sulfide intrusion in seagrasses assessed by stable sulfur isotopes-a synthesis of current results	2014	{"Hasler-Sheetal, Harald","Holmer, Marianne"}	{"Review or Book"}
1972501	Do intertidal Zostera noltei meadows represent a favourable habitat for amphipods? The case of the Kneiss Islands (Gulf of Gabes: Central Mediterranean Sea)	2020	{"Boudaya, Lobna","Dauvin, Jean-Claude","Mosbahi, Nawfel","Neifar, Lassad"}	{"No Stressor/Restoration"}
1973322	Long-term nutrient reductions lead to the unprecedented recovery of a temperate coastal region	2018	{"Batiuk, Richard A.","Dennison, William C.","Gurbisz, Cassie","Hannam, Michael","Keisman, Jennifer","Landry, J. Brooke","Lefcheck, Jonathan S.","Moore, Kenneth A.","Murphy, Rebecca R.","Orth, Robert J.","Patrick, Christopher J.","Testa, Jeremy","Weller, Donald E.","Wilcox, David J."}	{"Review or Book"}
1972728	Impacts of Urbanization and Development on Estuarine Ecosystems and Water Quality	2019	{"Corbett, D. Reide","Fitzgerald, Allison M.","Freeman, Lauren A.","Lemley, Daniel A.","Quigg, Antonietta","Steppe, Cecily N."}	{"Review or Book"}
1972685	Species recovery and recolonization of past habitats: lessons for science and conservation from sea otters in estuaries	2019	{"Beck, Michael W.","Becker, Benjamin H.","Beheshti, Kathryn M.","Boyer, Katharyn E.","Carswell, Lilian P.","Eby, Ron","Espinosa, Sarah","Foster, Erin U.","Grimes, Tracy M.","Hessing-Lewis, Margot","Hines, Ellen","Hughes, Brent B.","Needles, Lisa","Rudebusch, Jane","Scoles, Robert","Silliman, Brian R.","Staedler, Michelle","Tinker, M. Tim","Tomoleoni, Joseph A.","Wasson, Kerstin","Williams, Susan…	{"Non Seagrass","Review or Book"}
1973022	Seagrasses, the Unique Adaptation of Angiosperms to the Marine Environment: Effect of High Carbon and Ocean Acidification on Energetics and Ion Homeostasis	2019	{"BE Hasanuzzaman, M","Fernandez, Jose A.","Fujita, M","Rubio, Lourdes","Shabala, S"}	{"Review or Book"}
1978654	PRODUCTION IN NATURAL AND RESTORED SEAGRASSES - A CASE-STUDY OF A MACROBENTHIC POLYCHAETE	1993	{"BELL, SS","CLEMENTS, LAJ","KURDZIEL, J"}	{"No Stressor/Restoration"}
1977964	Reciprocal transplanting of the threatened seagrass Halophila johnsonii (Johnson's seagrass) in the Indian River Lagoon, Florida	2000	{"BE Bortone, SA","Hall, LM","Hanisak, MD","Heidelbaugh, WS","Kenworthy, WJ","Morris, LJ","Virnstein, RW","Whitfield, P"}	{"No Stressor/Restoration"}
2545913	Indicators of nutrient enrichment in coastal ecosystems of the northern Mexican Caribbean	2020	{"Almazan-Becerril, Antonio","Delgado-Pech, Benjamin","Garcia-Mendoza, Ernesto","Olivos-Ortiz, Aramis","Paytan, A.","Perez-Gomez, Javier A.","Rebolledo-Vieyra, M."}	{"Non Zostera"}
1979265	RECIPROCAL TRANSPLANT OF SEAGRASS ZOSTERA-MARINA L EFFECT OF SUBSTRATE ON GROWTH	1977	{"FONSECA, M","KENWORTHY, WJ"}	{"No Stressor/Restoration"}
1977587	Changes in the structure of a Posidonia oceanica meadow and in the diversity of associated decapod, mollusc and echinoderm assemblages, resulting from inputs of waste from a marine fish farm (Malta, Central Mediterranean)	2002	{"Borg, JA","Dimech, M","Schembri, PJ"}	{"No Stressor/Restoration"}
1978728	CHANGING FARM PRACTICE TO MEET ENVIRONMENTAL OBJECTIVES OF NUTRIENT LOSS TO OYSTER HARBOR	1993	{"PROUT, AL","WEAVER, DM"}	{"No Stressor/Restoration"}
2545940	Blue Restoration - Building Confidence and Overcoming Barriers	2020	{"Bayraktarov, Elisa","Brown, Benjamin M.","Lovelock, Catherine E.","Purandare, Jemma","Reeves, Simon","Shribman, Zoe I.","Sinclair, Elizabeth A.","Statton, John","Stewart-Sinclair, Phoebe J.","Waltham, Nathan"}	{"Non Zostera"}
1976810	Ecological data in integrated coastal zone management: Case study of Posidonia oceanica meadows along the Corsican coastline (Mediterranean sea)	2006	{"Ferrat, Lila","Pasqualini, Vanina","Pergent, Gerard","Pergent-Martini, Christine"}	{"No Stressor/Restoration"}
1976911	Sheath length as a monitoring tool for calculating leaf growth in eelgrass (Zostera marina L.)	2006	{"Gaeckle, JL","Ibarra-Obando, SE","Meling-Lopez, AE","Short, FT"}	{"No Stressor/Restoration"}
1976732	Urban seagrass: Status of Posidonia oceanica facing the Genoa city waterfront (Italy) and implications for management	2007	{"Albertelli, Giancarlo","Bianchi, Carlo Nike","Montefalcone, Monica","Morri, Carla"}	{"No Stressor/Restoration"}
1978561	CREATION OF ROCKY INTERTIDAL AND SHALLOW SUBTIDAL HABITATS TO MITIGATE FOR THE CONSTRUCTION OF A LARGE MARINA IN PUGET-SOUND, WASHINGTON	1994	{"CHENEY, D","GETZ, J","OESTMAN, R","VOLKHARDT, G"}	{"Management or Restoration"}
1977521	What constitutes essential nursery habitat for a marine species? A case study of habitat form and function for queen conch	2003	{"Stoner, AW"}	{"No Stressor/Restoration"}
1977663	Coastal habitats (mangroves, coral reefs and seagrass beds) of the ASEAN region: Status, utilization and management issues	2002	{"Chong, V. C.","Sasekumar, A."}	{"Management or Restoration"}
1977423	Benthic primary producers - a neglected environmental problem in Mediterranean maricultures?	2003	{"Duarte, CM","Holmer, M","Perez, M"}	{"Non Zostera"}
1978398	Natural and human-induced disturbance of seagrasses	1996	{"Short, FT","Wyllie-Echeverria, S"}	{Review}
1975538	Local Knowledge and Conservation of Seagrasses in the Tamil Nadu State of India	2011	{"Berg, K. J.","Newmaster, A. F.","Newmaster, S. G.","Palanisamy, M.","Ragupathy, S.","Sambandan, K."}	{"Management or Restoration"}
1973040	Bivalve aquaculture and eelgrass: A global meta-analysis	2019	{"Conway-Cranos, Letitia L.","Ferriss, Bridget E.","Hoberecht, Laura","Sanderson, Beth L."}	{Review}
1976882	Seagrass landscapes and their effects on associated fauna: A review	2006	{"Bostrom, Christoffer","Jackson, Emma L.","Simenstad, Charles A."}	{Review}
1974559	Macroalgae Blooms and their Effects on Seagrass Ecosystems	2014	{"Han Qiuying","Liu Dongyan"}	{Review}
1978237	Restoring eelgrass, Zostera marina L., habitat using a new transplanting technique: The horizontal rhizome method	1997	{"Davis, RC","Short, FT"}	{"Management or Restoration"}
1977888	Integrating biology and economics in seagrass restoration: How much is enough and why?	2000	{"Fonseca, MS","Julius, BE","Kenworthy, WJ"}	{"Management or Restoration"}
1977749	Genetic polymorphism and transplantation success in the mediterranean seagrass Posidonia oceanica	2001	{"Piazzi, L","Procaccini, G"}	{"Management or Restoration"}
1977702	Experimental transplanting of Posidonia australis seagrass in Port Hacking, Australia, to assess the feasibility of restoration	2002	{"Meehan, AJ","West, RJ"}	{"Management or Restoration"}
1977494	Effect of planting unit size and sediment stabilization on seagrass transplants in Western Australia	2003	{"Paling, EI","Walker, CJ","van Keulen, M"}	{"Management or Restoration"}
1978048	A rapid and simple method for transplanting eelgrass using single, unanchored shoots	1999	{"Fishman, JR","Harwell, MC","Orth, RJ"}	{"Management or Restoration"}
1978796	SEAGRASS DEGRADATION IN AUSTRALIAN COASTAL WATERS	1992	{"MCCOMB, AJ","WALKER, DI"}	{Review}
1977703	Distribution of Eelgrass, Zostera marina L. on Coasts of the Korean Peninsula: Preliminary Study for Eelgrass Restoration	2002	{"Lee, Kun-Seop","Lee, Sang-Yong Tom",Í∂åÏ≤úÏ§ë,Ï°∞Ï†ïÏùº}	{"Management or Restoration"}
1974968	Benthic habitat beta-diversity modeling and landscape metrics for the selection of priority conservation areas using a systematic approach: Magdalena Bay, Mexico, as a case study	2013	{"Barrera-Falcon, Erick","Hinojosa-Arango, Gustavo","Rioja-Nieto, Rodolfo","Riosmena-Rodriguez, Rafael"}	{"Management or Restoration"}
1974896	A methodological approach to understand functional relationships between ecological indices and human-induced pressures: The case of the Posidonia oceanica meadows	2013	{"Bacci, Tiziano","Cicero, Anna Maria","Giovanardi, Franco","Montefalcone, Monica","Penna, Marina","Rende, Sante Francesco","Trabucco, Benedetta"}	{"Management or Restoration"}
1974851	Application of Granulated Coal Ash for Remediation of Coastal Sediment	2014	{"Kim, Kyunghoi","Lee, In-Cheol",Êó•ÊØîÈáéÂø†Âè≤,Ëó§Áõ¥,Î•òÏÑ±Ìõà}	{"Management or Restoration"}
1975898	Assessing establishment success of Zostera marina transplants through measurements of shoot morphology and growth	2010	{"Kim, Jong-Hyeob","Lee, Kun-Seop","Li, Wen-Tao","Park, Jung-Im"}	{"Management or Restoration"}
1975825	SEED MATURITY OF THE MEDITERRANEAN SEAGRASS CYMODOCEA NODOSA	2010	{"Dominguez, M.","Infantes, E.","Terrados, J."}	{"Management or Restoration"}
1974385	Seed dispersal in the seagrass Zostera marina is mostly within the parent bed in a protected bay	2015	{"Hosokawa, Shinya","Kuwae, Tomohiro","Miyoshi, Eiichi","Nakaoka, Masahiro"}	{"Management or Restoration"}
1974308	Biodegradable Grids: An Effective Method for Eelgrass (Zostera marina) Restoration in Maine	2015	{"Disney, Jane E.","Kidder, George W.","Miller, Molly F.","Norden, Wendy S.","Taylor, Theodore","White, Shannon"}	{"Management or Restoration"}
1974201	Increasing the chance of a successful restoration of Zostera noltii meadows	2015	{"Borja, Angel","Chust, Guillem","Franco, Javier","Garmendia, Joxe M.","Valle, Mireia"}	{"Management or Restoration"}
1977390	Experimental studies of predation by bluefish Pomatomus saltatrix in varying densities of seagrass and macroalgae	2004	{"Allen, BT","Buckley, B","Harris, LA","Nixon, SW"}	{"No Stressor/Restoration"}
1977383	Light-bellied brent goose Branta bernicla hrota (East Canadian High Arctic population) in Canada, Ireland, Iceland, France, Greenland, Scotland, Wales, England, the Channel Islands and Spain.	2004	{"BA Robinson, James A.","Boertmann, David","Boertmann, David","Boyd, Hugh","Boyd, Hugh","Colhoun, Kendrew","Colhoun, Kendrew","Gudmundsson, Gudmunder A.","Gudmundsson, Gudmunder A.","Mackie, Kerry","Mackie, Kerry","Merne, Oscar J.","Merne, Oscar J.","O'Briain, Michael O.","O'Briain, Michael O.","Portig, Alex A.","Portig, Alex A.","Robinson, James A."}	{"No Stressor/Restoration"}
1975282	Present and future environmental impacts on the coastal zone of Berau (East Kalimantan, Indonesia), a deductive scenario analysis	2012	{"Becking, Leontine E.","Estradivari, Estra","Vermaat, Jan E."}	{"Management or Restoration"}
1975225	Nursery-propagated plants from seed: a novel tool to improve the effectiveness and sustainability of seagrass restoration	2012	{"Balestri, Elena","Lardicci, Claudio"}	{"Management or Restoration"}
1975034	Chemical Ecology of Marine Angiosperms: Opportunities at the Interface of Marine and Terrestrial Systems	2013	{"Kubanek, Julia","Sieg, R. Drew"}	{Review}
1974157	Coastal systems under change: Tuning assessment and management tools	2015	{"Cabral, Henrique","Elliott, Mike","Guilhermino, Lucia","Marques, Joao Carlos","de Jonge, Victor"}	{"Management or Restoration"}
1977158	Pilot transplanting project of Cymodocea nodosa and Zostera marina in the Lagoon of Venice: Results and perspectives	2005	{"Curiel, Daniele","Marzocchi, Mara","Rismondo, Andrea","Scarton, Francesco"}	{"Management or Restoration"}
1974424	The detrimental consequences for seagrass of ineffective marine park management related to boat anchoring	2015	{"Ceccherelli, G.","Donno, Y.","La Manna, G.","Sara, G."}	{"Management or Restoration"}
1977385	Emergence stress and morphological constraints affect the species distribution and growth of subtropical intertidal seagrasses	2004	{"Nakaoka, M","Tanaka, Y"}	{"Management or Restoration"}
1974442	Transplantation assessment of degraded Posidonia oceanica habitats: site selection and long-term monitoring	2015	{"Bellavia, C.","Bellissimo, G.","Calvo, S.","Costantini, C.","Di Maida, G.","Luzzu, F.","Orestano, C.","Pirrotta, M.","Scannavino, A.","Sclafani, G.","Tomasello, A."}	{"Management or Restoration"}
1974439	Long-Distance Interactions Regulate the Structure and Resilience of Coastal Ecosystems	2015	{"Altieri, Andrew H.","BE Carlson, CA","Bouma, Tjeerd J.","Eriksson, Britas Klemens","Giovannoni, SJ","Olff, Han","Silliman, Brian R.","van de Koppel, Johan","van der Heide, Tjisse"}	{"Management or Restoration",Review}
1974162	Towards adaptive management of the natural capital: Disentangling trade-offs among marine activities and seagrass meadows	2015	{"Bas Ventin, Leticia","Villasante, Sebastian","de Souza Troncoso, Jesus"}	{"Management or Restoration"}
1979026	A METHOD FOR THE CULTURE OF TROPICAL SEAGRASSES	1985	{"SHORT, FT"}	{"Management or Restoration"}
1978242	Modelling biomass and nutrient dynamics in eelgrass (Zostera marina L.): applications to the Lagoon of Venice (Italy) and Oresund (Denmark)	1997	{"Bendoricchio, G","Bocci, M","Coffaro, G"}	{"No Stressor/Restoration"}
1976452	Physiological responses of the seagrass Posidonia oceanica as indicators of fish farm impact	2008	{"Garcia, Tania","Invers, Olga","Perez, Marta","Ruiz, Juan Manuel"}	{"Management or Restoration"}
1978077	Effects of changes in seagrass shoot density and leaf height on abundances and distribution patterns of juveniles of three gobiid fishes in a Zostera marina bed	1999	{"Horinouchi, M","Sano, R"}	{"No Stressor/Restoration"}
1974715	The "one-out, all-out" principle entails the risk of imposing unnecessary restoration costs: A study case in two Mediterranean coastal lakes	2014	{"De Luca, E.","Izzo, G.","La Valle, P.","Lattanzi, L.","Migliore, G.","Mistri, M.","Morgana, J. G.","Munari, C.","Nicoletti, L.","Prato, S."}	{"Management or Restoration"}
1974593	Effectiveness of habitat classes as surrogates for biodiversity in marine reserve planning	2014	{"Dixon-Bridges, Kylie","Gladstone, William","Hutchings, Pat"}	{"Management or Restoration"}
1974937	Potential roles of Labyrinthula spp. in global seagrass population declines	2013	{"Damare, Varada S.","Gleason, Frank H.","Lilje, Osu","Sherman, Timothy D.","Sullivan, Brooke K."}	{"Review or Book"}
1974268	Roles of dispersal and predation in determining seedling recruitment patterns in a foundational marine angiosperm	2015	{"Manley, Stephen R.","Orth, Robert J.","Ruiz-Montoya, Leonardo"}	{"Management or Restoration"}
1974324	Non-consumptive effects of avian predators on fish behavior and cascading indirect interactions in seagrasses	2015	{"Heck, Kenneth L., Jr.","Hill, Jennifer M."}	{"Management or Restoration"}
1973149	Effects of Zostera marina rhizosphere and leaf detritus on the concentration and distribution of pore-water sulfide in marine sediments	2018	{"Shull, David H.","Simpson, Alexandra G.","Tripp, Laura","Yang, Sylvia"}	{"No Stressor/Restoration"}
1976039	Effects of Seagrass Rhizospheres on Sediment Redox Conditions in SE Asian Coastal Ecosystems	2010	{"Duarte, Carlos M.","Fortes, Miguel D.","Gacia, Esperanca","Halun, Zayda","Marba, Nuria","Terrados, Jorge"}	{"No Stressor/Restoration"}
1974415	Assessing establishment success and suitability analysis of Zostera marina transplants using staple method in northern lagoons	2015	{"Guo Dong","Liu Yan-Shan","Zeng Xing","Zhang Pei-Dong","Zhang Xiu-Mei","Zhang Ying"}	{"Management or Restoration"}
1973480	Potential and realized connectivity of the seagrass Posidonia oceanica and their implication for conservation	2017	{"Casagrandi, Renato","Jahnke, Marlene","Melia, Paco","Procaccini, Gabriele","Schiavina, Marcello","Schultz, Stewart T.","Zane, Lorenzo"}	{"Management or Restoration"}
1973474	New direction of management policies of the Seto Inland Sea and rich fishery production.	2017	{"Matsuda, Osamu"}	{"Management or Restoration"}
1973329	Marine protected areas in Cuba	2018	{"Alcolado, Pedro M.","Caballero Aragon, Hansel","Cobian Rojas, Dorka","Espinosa Pantoja, Leonardo","Ferro Azcona, Hakna","Gonzalez Mendez, Juliett","Hernandez Avila, Aylem","Hernandez Gonzalez, Zaimiuri","Milian Hernandez, Elvis","Moreno Martinez, Orestes","Perera Valderrama, Susana","Pina-Amargos, Fabian","Rodriguez Farrat, Lazar Francisco"}	{"Management or Restoration"}
1978792	VEGETATIVE REPRODUCTION IN POSIDONIA-OCEANICA I. EFFECTS OF RHIZOME LENGTH AND TRANSPLANTATION SEASON IN ORTHOTROPIC SHOOTS	1992	{"BELLONE E","LOQUES F","MEINESZ A","MOLENAAR H"}	{"Management or Restoration"}
1976207	Contrasting responses of seagrass transplants (Posidonia australis) to nitrogen, phosphorus and iron addition in an estuary and a coastal embayment	2009	{"Cambridge, M. L.","Kendrick, G. A."}	{"Management or Restoration"}
1972843	Seagrass restoration in Gulf of Mannar, Tamil Nadu, Southeast India: a viable management tool	2019	{"Arasamuthu, A.","Bilgi, Deepak S.","D' Souza, Nisha","Edward, J. K. Patterson","Kumar, P. Dinesh","Mathews, G.","Raj, K. Diraviya"}	{"Management or Restoration"}
1972756	Aquatic Angiosperm Transplantation: A Tool for Environmental Management and Restoring in Transitional Water Systems	2019	{"Berto, Daniela","Bonometto, Andrea","Brusa, Rossella Boscolo","Buosi, Alessandro","Cacciatore, Federica","Facca, Chiara","Franzoi, Piero","Gion, Claudia","Juhmani, Abdul-Salam","Oselladore, Federica","Ponis, Emanuele","Rampazzo, Federico","Scapin, Luca","Sfriso, Adriano","Sfriso, Andrea Augusto","Tomio, Yari"}	{"Management or Restoration"}
1972600	An integrated approach for the design of a marine protected area network applied to mainland Portugal	2020	{"Abecasis, David","Timonet, Diana Serrano"}	{"Management or Restoration"}
1976802	The UNEP/GEF Seagrass Demonstration Sites in South China Sea: Milestones in Seagrass Research and Biodiversity Management in East Asia	2007	{"Almonte, Tutu","BE Rigby, PR","Fortes, Miguel D.","Huang, Xaophing","Kuriandewa, Tri Edi","Marco Montano, Nemesio","Nguyen Van Tien","Shirayama, Y","Sour, Kim","Sstumantpan, Suvaluck","Vibol, Ouk"}	{"Management or Restoration","Review or Book"}
1975289	Characteristics of seagrass seed and restoration of seagrass bed	2012	{"Cong Wei","Han Hou-Wei","Jiang Xin","Li Xiao-Jie","Pan Jin-Hua","Sheng Bao-Li","Song Shao-Feng","Sun Juan","Wang Qing-Yan","Zhang Zhuang-Zhi"}	{"Management or Restoration"}
1972796	Sowing the Seeds of Seagrass Recovery Using Hessian Bags	2019	{"Bertelli, Chiara M.","Cullen-Unsworth, Leanne C.","Esteban, Nicole","Jones, Benjamin L.","Lilley, Richard","Lowe, Christopher","Nuuttila, Hanna K.","Rees, Samuel C.","Unsworth, Richard K. F."}	{"Management or Restoration"}
1972705	In situ investigation of the influence of desiccation on sediment seed banks and population recruitment of the seagrass Ruppia sinensis in the Yellow River Delta, China	2019	{"Gu, Ruiting","Song, Xiaoyue","Xu, Shaochun","Xu, Shuai","Yue, Shidong","Zhang, Xiaomei","Zhang, Yu","Zhou, Yi","Zhu, Shuyu"}	{"Management or Restoration"}
1979098	GROWTH AND PHOTOSYNTHETIC RESPONSES TO TEMPERATURE OF 2 POPULATIONS OF ZOSTERA-MARINA	1983	{"EVANS, AS"}	{Conference}
1972948	Monitoring of physically restored seagrass meadows reveals a slow rate of recovery for Thalassia testudinum	2019	{"Furman, Bradley T.","Hall, Margaret O.","Kenworthy, William J.","Merello, Manuel","Shea, Colin P."}	{"Management or Restoration"}
1979012	DEVELOPMENT OF TECHNIQUES FOR MARINE MACROPHYTE BED CREATION IN THE COASTAL ZONE NEAR A POWER PLANT 6. ASSESSMENT OF A TRANSPLANTING METHOD TO PREVENT THE EELGRASS ZOSTERA-MARINA L. FROM BEING WASHED AWAY	1986	{"TERAWAKI T","WATANABE Y"}	{"Not accessible","Technical Report"}
1976552	Unregulated harvesting of intertidal shellfish in Strangford Lough.	2008	{"Johnson, M.P.","Portig, A.","Roberts, D.","Smyth, D."}	{"Not accessible","Technical Report"}
1977701	Local adaptation and transplant dominance in genets of the marine clonal plant Zostera marina	2002	{"Hammerli, A","Reusch, TBH"}	{"Management or Restoration"}
1973659	Can greening of aquaculture sequester blue carbon?	2017	{"Ahmed, Nesar","Bunting, Stuart W.","Diana, James S.","Flaherty, Mark S.","Glaser, Marion"}	{"Management or Restoration"}
1973611	Challenges for the conservation of marine small natural features	2017	{"Bulmer, Richard H.","Clark, Malcolm R.","Hewitt, Judi E.","Hillman, Jenny R.","Lundquist, Carolyn J.","Nelson, Wendy A.","Norrie, Craig R.","Rowden, Ashley A.","Tracey, Dianne M."}	{"Management or Restoration"}
1973595	Consideration of Natural Sources in a Bacteria TMDL-Lines of Evidence, Including Beach Microbial Source Tracking	2017	{"Crumpacker, Andrea","Curtis, Kathryn","Goodwin, Kelly D.","Jirik, Andrew","Schriewer, Alexander"}	{"No Stressor/Restoration"}
1973812	Editorial: Bridging the Gap between Policy and Science in Assessing the Health Status of Marine Ecosystems	2017	{"Borja, Angel","Carstensen, Jacob","Elliott, Michael","Mea, Marianna","Uyarra, Maria C."}	{"Management or Restoration"}
1973872	Validating GIS tool to assess eelgrass potential recovery in the Limfjorden (Denmark)	2016	{"Canal-Verges, Paula","Erichsen, Anders","Flindt, Mogens R.","Petersen, Jens K.","Rasmussen, Erik K."}	{"Management or Restoration"}
1973333	A functional-structural model of ephemeral seagrass growth influenced by environment	2018	{"Cambridge, M. L.","Renton, M.","Whitehead, S."}	{"Management or Restoration"}
1973234	Water residence time controls the feedback between seagrass, sediment and light: Implications for restoration	2018	{"Adams, Matthew P.","Baird, Mark E.","Callaghan, David P.","Ghisalberti, Marco","Infantes, Eduardo","Lowe, Ryan J.","O'Brien, Katherine R."}	{"Management or Restoration"}
1977690	Assessment of a trophic cascade model in a temperate seagrass system under a nitrogen gradient.	2002	{"Ibarra-Obando, Silvia E.","Jorgensen, Pablo"}	{Conference}
1973864	Feedback between sediment and light for seagrass: Where is it important?	2016	{"Adams, Matthew P.","Bruce, Louise C.","Callaghan, David P.","Ghisalberti, Marco","Gruber, Renee K.","Hipsey, Matthew R.","Hovey, Renae K.","Kendrick, Gary A.","Lowe, Ryan J.","Maxwell, Paul S.","O'Brien, Katherine R.","Ruiz-Montoya, Leonardo"}	{"Review or Book"}
1974675	From Headwaters to Coast: Influence of Human Activities on Water Quality of the Potomac River Estuary	2014	{"Bricker, Owen P., III","Bricker, Suzanne B.","Rice, Karen C."}	{"Management or Restoration"}
1978269	Aureococcus anophagefferens: Causes and ecological consequences of brown tides in US mid-Atlantic coastal waters	1997	{"Bricelj, VM","Lonsdale, DJ"}	{"Review or Book"}
1978206	Pollutant load reduction models for estuaries	1998	{"BE Spaulding, ML","Blumberg, AF","Sheng, YP"}	{"Management or Restoration"}
1976624	Do desiccation tolerances control the vertical distribution of intertidal seagrasses?	2007	{"Shafer, Deborah J.","Sherman, Timothy D.","Wyllie-Echeverria, Sandy"}	{"No Stressor/Restoration"}
1977334	The nitrogen cycle in tidal flats and eelgrass beds of Ise Bay	2004	{"Hata, K","Nakata, K","Suzuki, T"}	{"Non Zostera"}
1977856	Estuaries of the northeastern United States: Habitat and land use signatures	2000	{"Findlay, S","Jaworski, N","Roman, CT","Short, FT","Warren, RS"}	{"Review or Book"}
1977706	Impact of changes in flow of freshwater on estuarine and open coastal habitats and the associated organisms.	2002	{"Atkinson, R. J. A.","BE Gibson, R. N.","Barnes, Margaret","Gillanders, Bronwyn M.","Kingsford, Michael J."}	{"Review or Book"}
1977411	Temporal and spatial changes of macroalgae and phytoplankton in a Mediterranean coastal area: the Venice lagoon as a case study	2003	{"Facca, C","Ghetti, PF","Sfriso, A"}	{"Non Zostera","No Stressor/Restoration"}
1975710	Anchoring Damage on Seagrass Meadows (Posidonia oceanica (L.) Delile) in Fethiye-Gocek Specially Protected Area (Eastern Mediterranean Sea, Turkey)	2011	{"Demir, Volkan","Kalkan, Evrim","Karhan, Unsal","Okudan, Emine S."}	{"Non Zostera"}
1977583	Seagrass habitats of northeast Australia: Models of key processes and controls	2002	{"Abal, EG","Carruthers, TJB","Dennison, WC","Long, WJL","Longstaff, BJ","McKenzie, LJ","Waycott, M"}	{"Management or Restoration","Review or Book"}
1977182	Eutrophication of Chesapeake Bay: historical trends and ecological interactions	2005	{"Adolf, JE","Boesch, DF","Boicourt, WC","Boynton, WR","Brush, G","Cornwell, JC","Fisher, TR","Glibert, PM","Hagy, JD","Harding, LW","Houde, ED","Kemp, WM","Kimmel, DG","Miller, WD","Newell, RIE","Roman, MR","Smith, EM","Stevenson, JC"}	{"Review or Book"}
1975804	Restoring Coastal Ecosystems from Fisheries and Aquaculture Impacts	2011	{"BE Wolanski, E","Carvalho, S.","Curdia, J.","Gaspar, M. B.","McLusky, D","Vasconcelos, P.","dos Santos, M. N."}	{"Review or Book"}
1975772	Baseline water quality of the Jurien Bay Marine Park: a benchmark for warm temperate Western Australia?	2011	{"Bancroft, K. P.","Kendrick, A. J.","Rule, M. J."}	{"Non Zostera"}
1973044	Examination of the Effects of Curvature in Geometrical Space on Accuracy of Scaling Derived Projections of Plant Biomass Units: Applications to the Assessment of Average Leaf Biomass in Eelgrass Shoots	2019	{"Echavarria-Heras, Hector","Leal-Ramirez, Cecilia","Montesinos-Lopez, Abelardo","Villa-Diharce, Enrique"}	{"Management or Restoration"}
1973412	Marine Animals Protected by the IUCN Red Data List and CITES 1973 on Seagrass Ecosystems	2018	{"BE Amin, M","Hidayati, Nurul","Pramudianto, Andreas","Suharso, Putut"}	{"Management or Restoration"}
1973250	Restoring near-shore marine ecosystems to enhance climate security for island ocean states: Aligning international processes and local practices	2018	{"Forsyth, Catherine","Meriwether, A.","Wilson, W."}	{"Management or Restoration"}
1974803	Effects of Typhoon on Seagrass Distribution	2014	{"BE Tang, D","Sui, G","Yang, ChaoYu","Yang, DingTian"}	{"Review or Book"}
1974978	Private ownership of underwater lands in Great South Bay, New York: A case study in degradation, restoration and protection	2013	{"LoBue, Carl","Udelhoven, Jay"}	{"Management or Restoration"}
1976407	Community shifts, alternative stable states, biogeochemical controls and feedbacks in eutrophic coastal lagoons: a brief overview	2008	{"Bartoli, Marco","Giordani, Gianmarco","Naldi, Mariachiara","Orfanidis, Sotiris","Viaroli, Pierluigi","Zaldivar, Jose Manuel"}	{"Management or Restoration","Review or Book"}
1974198	Responses of seagrass to anthropogenic and natural disturbances do not equally translate to its consumers	2015	{"Hernan, Gema","Martinez-Crego, Begona","Santos, Rui","Tomas, Fiona"}	{"Non Zostera"}
1974047	Dynamics of recruitment and establishment of the invasive seaweed Codium fragile within an eelgrass habitat	2016	{"Drouin, Annick","Johnson, Ladd E.","McKindsey, Christopher W."}	{"Non Zostera"}
1973808	Seagrass Restoration Monitoring	2017	{"Burdick, David M.","Coen, Loren D.","Davis, Frank W.","Doering, Peter","Gulland, Frances","Heck, Kenneth L.","Howard, Matthew K.","Kearney, Michael S.","Montagna, Paul A.","Plotkin, Pamela T.","Rose, Kenneth A.","Smith, Eric P.","Tallis, Heather M.","Thom, Ronald","Woodrey, Mark S."}	{"Management or Restoration","Review or Book"}
1973710	Marine reserves and seascape context shape fish assemblages in seagrass ecosystems	2017	{"Connolly, Rod M.","Gilby, Ben L.","Henderson, Christopher J.","Lee, Shing Y.","Maxwell, Paul S.","Olds, Andrew D.","Stevens, Tim"}	{"Management or Restoration"}
1974605	Evidence of Season-Dependency in Vegetation Effects on Macrofauna in Temperate Seagrass Meadows (Baltic Sea)	2014	{"Balazy, Piotr","Jankowska, Emilia","Kotwicki, Lech","Wlodarska-Kowalczuk, Maria"}	{"No Stressor/Restoration"}
1975626	Food Web Structure in a Chesapeake Bay Eelgrass Bed as Determined through Gut Contents and C-13 and N-15 Isotope Analysis	2011	{"Canuel, Elizabeth A.","Douglass, James G.","Duffy, J. Emmett"}	{"No Stressor/Restoration"}
1973523	Testing for thresholds of ecosystem collapse in seagrass meadows	2017	{"Burnell, Owen W.","Connell, Sean D.","Doubleday, Zoe A.","Falkenberg, Laura J.","Fernandes, Milena","Griffin, Kingsley J.","Irving, Andrew D.","Leung, Jonathan Y. S.","Owen, Samuel","Russell, Bayden D."}	{"Non Zostera"}
1974938	Assessing the capacity of seagrass meadows for carbon burial: Current limitations and future strategies	2013	{"Duarte, Carlos M.","Hendriks, Iris","Kennedy, Hilary","Marba, Nuria"}	{"Management or Restoration","Review or Book"}
1973614	Patterns of shading tolerance determined from experimental light reduction studies of seagrasses	2017	{"Nelson, Walter G."}	{"Review or Book"}
1972846	Relationship between regional climate change and primary ecosystem characteristics in a lagoon undergoing anthropogenic eutrophication, Lake Mokoto, Japan	2019	{"Katsuki, Kota","Seto, Koji","Sonoda, Takeshi","Takata, Hiroyuki","Tsujimoto, Akira"}	{"Non Seagrass"}
2545948	Impact of seagrass establishment, industrialization and coastal infrastructure on seagrass biogeochemical sinks	2020	{"Bongiovanni, James","Duarte, Carlos M.","Lavery, Paul S.","Serrano, Oscar"}	{"Non Zostera"}
1978647	A POSSIBLE EFFECT OF SALINITY FLUCTUATION ON ABUNDANCE OF BENTHIC VEGETATION AND ASSOCIATED FAUNA IN NORTHEASTERN FLORIDA BAY	1993	{"LEY, JA","MONTAGUE, CL"}	{"No Stressor/Restoration"}
3233564	Studies on Labyrinthula the etiologic agent of the wasting disease of eel-grass	1943	{"Young, EL"}	{"No Stressor/Restoration"}
1979019	THE USE OF ECOLOGICAL DATA IN THE IMPLEMENTATION AND MANAGEMENT OF SEAGRASS RESTORATIONS	1985	{"FONSECA, MS","KENWORTHY, WJ","THAYER, GW"}	{"No Stressor/Restoration"}
2545981	Using species distribution models to guide seagrass management	2020	{"Barnes, Matthew A.","Bittner, Rachel E.","Roesler, Elizabeth L."}	{"Non Zostera"}
1976876	Thalassia testudinum seedling responses to changes in salinity and nitrogen levels	2006	{"Durako, Michael J.","Kahn, Amanda E."}	{"No Stressor/Restoration"}
1976813	Impact of fish farming facilities on Posidonia oceanica meadows: a review	2006	{"Boudouresque, Charles-Francois","Pasqualini, Vanina","Pergent, Gerard","Pergent-Martini, Christine"}	{"No Stressor/Restoration"}
1976782	Response and recovery dynamics of seagrasses Thalassia testudinum and Syringodium filiforme and macroalgae in experimental motor vessel disturbances	2007	{"Hammerstrom, K. K.","Kenworthy, W. J.","Merell, M. F.","Whitfield, P. E."}	{"No Stressor/Restoration"}
1973556	Temporal Variation of Intertidal Seagrass in Southern China (2008-2014)	2017	{"Fan, Hangqing","Liu, Guohua","Qiu, Guanglong","Short, Frederick T."}	{"Non Zostera"}
2100057	Performing antibacterial preservation of Zostera marina seeds, involves immersing Zostera marina seeds in mixed solution of nano silver and copper sulfate prepared with seawater, sealing and storing seeds	NA	{"GU R","XU S","YANG H","YUE S","ZHANG X","ZHANG Y","ZHOU Y"}	{"Management or Restoration"}
1977844	A marine rapid assessment of the Togean and Banggai Islands, Sulawesi, Indonesia.	2001	NA	{"Management or Restoration"}
1977713	Degradation of marine ecosystems and decline of fishery resources in marine protected areas in the US Virgin Islands	2001	{"Beets, J","Rogers, CS"}	{"Management or Restoration"}
1977589	A perspective on two decades of policies and regulations influencing the protection and restoration of submerged aquatic vegetation in Chesapeake Bay, USA	2002	{"Batiuk, RA","Bergstrom, PW","Moore, KA","Orth, RJ"}	{"Management or Restoration"}
1978079	Seagrass herbivory: evidence for the continued grazing of marine grasses	1999	{"Heck, KL","Valentine, JF"}	{Review}
1974623	Repair and revitalisation of Australia's tropical estuaries and coastal wetlands: Opportunities and constraints for the reinstatement of lost function and productivity	2014	{"Brookes, Justin","Coles, Rob","Freckelton, Marnie","Groves, Paul","Johnston, Ross","Sheaves, Marcus","Winberg, Pia"}	{"Management or Restoration"}
1973858	Distribution and status of Zostera capensis in South African estuaries - A review	2016	{"Adams, J. B."}	{"Management or Restoration",Review}
1977874	Variations of the macrobenthic community in a seagrass transplanted area of the Lagoon of Venice	2000	{"Curiel, D","Marzocchi, M","Pranovi, F","Rismondo, A","Scattolin, M"}	{"Management or Restoration"}
1974429	Biological mechanisms supporting adaptation to ocean acidification in coastal ecosystems	2015	{"Duarte, Carlos M.","Hendriks, Iris E.","McCulloch, Malcolm","Moore, Tommy S.","Olsen, Ylva S.","Ramajo, Laura","Steckbauer, Alexandra","Trotter, Julie A."}	{Review}
1978536	A small-scale spatial analysis system for maritime Australia	1995	{"Cocks, KD","Hamilton, NTM"}	{"Management or Restoration"}
1978562	DYNAMICS OF EPIPHYTIC PHOTOAUTOTROPHS AND HETEROTROPHS IN ZOSTERA-MARINA (EELGRASS) MICROCOSMS - RESPONSES TO NUTRIENT ENRICHMENT AND GRAZING	1994	{"HAAS, LW","KOEPFLER, ET","NECKLES, HA","ORTH, RJ","WETZEL, RL"}	{"Non Seagrass"}
1978201	In vitro germination and seedling development of Posidonia oceanica	1998	{"Balestri, E","Cinelli, F","Piazzi, L"}	{"Management or Restoration"}
1975134	A comparison of the impact of 'seagrass-friendly' boat mooring systems on Posidonia australis	2013	{"Davis, Andrew R.","Demers, Marie-Claire A.","Knott, Nathan A."}	{"Management or Restoration"}
1975075	Coastal biodiversity management in Japanese satoumi	2013	{"Berque, Joannes","Matsuda, Osamu"}	{"Management or Restoration"}
1975004	Drivers of estuarine benthic species distribution patterns following a restoration of a seagrass bed: A functional trait analyses	2013	{"Cardoso, Patricia","Dolbeth, Marina","Grilo, Tiago","Pardal, Miguel Angelo","Raffaelli, Dave"}	{"Management or Restoration"}
1974981	Seagrass Restoration Enhances "Blue Carbon" Sequestration in Coastal Waters	2013	{"Greiner, Jill T.","Gunnell, John","McGlathery, Karen J.","McKee, Brent A."}	{"Management or Restoration"}
1974277	Applicability of steel slag as a substrate in eelgrass (Zostera marina L.) beds restoration in coastal Japan	2015	{"Nagao, Masayuki","Nishijima, Wataru","Suzumura, Masahiro","Tanimoto, Terumi","Tsukasaki, Ayumi","Tsurushima, Nobuo"}	{"Management or Restoration"}
1974248	Sexual Recruitment in Zostera marina: Progress toward a Predictive Model	2015	{"Furman, Bradley T.","Peterson, Bradley J."}	{"Management or Restoration",Review}
1975935	An ecosystem-scale predictive model of coastal seagrass distribution	2010	{"Coles, R. G.","Grech, A."}	{"Management or Restoration"}
1975920	Growing Zostera marina (eelgrass) from Seeds in Land-Based Culture Systems for Use in Restoration Projects	2010	{"Parham, Thomas","Tanner, Christopher E."}	{"Management or Restoration"}
1977244	Recovery and succession in a multi-species tropical seagrass meadow following experimental disturbance: the role of sexual and asexual reproduction	2004	{"Rasheed, MA"}	{"Management or Restoration"}
1975080	Limitations of habitats as biodiversity surrogates for conservation planning in estuaries	2013	{"Gladstone, William","Shokri, Mohammad Reza"}	{"Management or Restoration"}
1974809	Nektonic assemblages determined from baited underwater video in protected versus unprotected shallow seagrass meadows on Kangaroo Island, South Australia	2014	{"Brock, Daniel J.","Fairweather, Peter G.","Miller, David","Whitmarsh, Sasha K."}	{"Management or Restoration"}
1974999	Ecoregional scale seagrass mapping: A tool to support resilient MPA network design in the Coral Triangle	2013	{"Andrefouet, Serge","Campbell, Stuart J.","Darmawan, Arief","Torres-Pulliza, Damaris","Wilson, Joanne R."}	{"Management or Restoration"}
1974202	The effect of storage condition on viability of Enhalus acoroides seedlings	2015	{"Ambo-Rappe, Rohani","Yasir, Inayah"}	{"Management or Restoration"}
1976545	Dynamics of shallow-water assemblages in the Saipan Lagoon	2008	{"Houk, Peter","van Woesik, Robert"}	{"Management or Restoration"}
1976403	Transplantation as a method for restoring the seagrass Posidonia australis	2008	{"Bastyan, G. R.","Cambridge, M. L."}	{"Management or Restoration"}
1976380	Spatial patterns of sub-tidal seagrasses and their tissue nutrients in the Torres Strait, northern Australia: Implications for management	2008	{"Carter, Alex B.","Coles, Robert G.","McKenzie, Len J.","Pitcher, C. Roland","Sheppard, James K."}	{"Management or Restoration"}
1973980	Assessing methods for restoration of eelgrass (Zostera marina L.) in a cold temperate region	2016	{"Eriander, Louise","Infantes, Eduardo","Moksnes, Per-Olav","Olofsson, Malin","Olsen, Jeanine L."}	{"Management or Restoration"}
1974081	Measures for environmental conservation in enclosed coastal seas	2016	{"Ishikawa, Takuya","Nakura, Yoshio","Tomita, Akio"}	{"Management or Restoration"}
1976337	Seagrass on the edge: Land-use practices threaten coastal seagrass communities in Sabah, Malaysia	2008	{"Coles, R. G.","Freeman, A. S.","Isnain, I.","Razak, F. A.","Short, F. T."}	{"Management or Restoration"}
1974733	Inorganic Nutrient Supplements Constrain Restoration Potential of Seedlings of the Seagrass, Posidonia australis	2014	{"Cambridge, Marion L.","Dixon, Kingsley W.","Kendrick, Gary A.","Statton, John"}	{"Management or Restoration"}
1974915	Effects of nutrient enrichment on seagrass population dynamics: evidence and synthesis from the biomass-density relationships	2013	{"Apostolaki, Eugenia T.","Cabaco, Susana","Garcia-Marin, Patricia","Gruber, Renee","Hernandez, Ignacio","Martinez-Crego, Begona","Mascaro, Oriol","Perez, Marta","Prathep, Anchana","Robinson, Cliff","Romero, Javier","Santos, Rui","Schmidt, Allison L.","Short, Fred T.","van Tussenbroek, Brigitta I."}	{"Review or Book"}
1974731	Germination Rate of Phyllospadix japonicus Seeds Relative to Storage Methods and Periods	2014	{"Lee, Kun-Seop","Park, Jung-Im","Son, Min Ho"}	{"Management or Restoration"}
1973619	Leaf Spectral Reflectance Shows Thalassia testudinum Seedlings More Sensitive to Hypersalinity than Hyposalinity	2017	{"Durako, Michael J.","Howarth, Jacqueline F."}	{"Non Zostera"}
1972741	In the blind-spot of governance - Stakeholder perceptions on seagrasses to guide the management of an important ecosystem services provider	2019	{"Krause, Torsten","Marba, Nuria","Ruiz-Frau, Ana"}	{"Management or Restoration"}
1973913	Ecosystem services returned through seagrass restoration	2016	{"McGlathery, Karen J.","Orth, Robert J.","Reynolds, Laura K.","Waycott, Michelle"}	{"Management or Restoration"}
1974512	An effective seeding method for restoring the surfgrass Phyllospadix japonicus using an aartificial reef	2014	{"Kim, Jeong Bae","Lee, Kun-Seop","Park, Jung-Im","Son, Min Ho"}	{"Management or Restoration"}
1974480	Identification of important marine areas around the Japanese Archipelago: Establishment of a protocol for evaluating a broad area using ecologically and biologically significant areas selection criteria	2015	{"Fujikura, Katsunori","Hidaka, Kiyotaka","Hirota, Yuichi","Ichikawa, Tadafumi","Jintsu-Uchifune, Yoshie","Kakehi, Shigeho","Kameda, Takahiko","Kitajimal, Satoshi","Kogure, Kazuhiro","Komatsu, Teruhisa","Kumagai, Naoki H.","Miyamoto, Hiroomi","Miyashita, Kazushi","Morimoto, Haruyuki","Nakajima, Ryota","Nakaoka, Masahiro","Nishida, Shuhei","Nishiuchi, Kou","Sakamoto, Shingo","Sano, Masayoshi","Shi…	{"Management or Restoration"}
1973379	Towards evidence-based parameter values and priors for aquatic ecosystem modelling	2018	{"Arhonditsis, George B.","Baird, Mark E.","Brebion, Jerome","Edwards, Kyle F.","Geoffroy, Leonie","Hebert, Marie-Pier","Jones, Emlyn M.","Kong, Xiangzhen","Kruk, Carla","Mongin, Mathieu","Robson, Barbara J.","Shimoda, Yuko","Skerratt, Jennifer H.","Steven, Andy","Trevathan-Tackett, Stacey M.","Wild-Allen, Karen","van Dongen-Vogels, Virginie"}	{"Management or Restoration"}
1974414	Feeding on the edge: delta C-13 analysis of a macrofauna food web from disappearing seagrass beds in a polluted urban harbour - implications for biomonitoring and restoration efforts	2015	{"France, R. L."}	{"Management or Restoration"}
1978721	REVIEW OF THE EFFECTS OF NONPOINT NUTRIENT LOADING ON COASTAL ECOSYSTEMS	1993	{"BELL, PRF","GABRIC, AJ"}	{"Review or Book"}
1978434	Physiological responses of the seagrass, Zostera marina L., to increased water-column nitrate and increased temperature	1996	{"Burkholder, Joann M.","Glasgow, Howard B., Jr."}	{Conference}
1977282	Can oysters and eelgrass co-exist? Interactions between Crassostrea gigas and Zostera marina outside an aquaculture setting.	2004	{"Dumbauld, Brett R.","Hacker, S. D.","Ruesink, J. L.","Tallis, Heather M.","Wisehart, Lorena M."}	{Conference}
1977707	Stranded Zostera marina L. vs wrack fauna community interactions on a Baltic sandy beach (Hel, Poland): a short-term pilot study. Part I. Driftline effects of fragmented detritivory, leaching and decay rates	2002	{"Jedrzejczak, MF"}	{"No Stressor/Restoration"}
1978125	Experimental transplanting of Posidonia oceanica (L.) Delile into a disturbed habitat in the Mediterranean sea	1998	{"Balestri, E","Cinelli, F","Magri, M","Piazzi, L"}	{"Management or Restoration"}
1973777	2nd International Conference on Applied Marine Science and Fisheries Technology (MSFT) 2017	2017	NA	{Conference}
1973744	A spatial model to improve site selection for seagrass restoration in shallow boating environments	2017	{"Ellis, L. Rex","Frazer, Thomas K.","Hotaling-Hagan, Althea","Swett, Robert"}	{"Management or Restoration"}
1972655	Seagrass habitat suitability modeling for the Alabama Barrier Island restoration assessment at Dauphin Island	2020	{"Bunch, Barry","Cebrian, Just","Couvillion, Brady","Dalyander, Soupy","Darnell, Kelly","Enwright, Nicholas M.","Kim, Sung-Chan","LaPeyre, Megan K.","Mickey, Rangley C.","Segura, Martha","Stelly, Spencer","Wang, Hongqing"}	{"Management or Restoration"}
1976614	Restoring eelgrass to San Francisco Bay: A mesocosm comparison of donor-specific seedling recruitment and genetic diversity	2007	{"Boyer, Katharyn E.","Cohen, Sarah","Ort, Brian","Reynolds, Laura K.","Wyllie-Echeverria, Sandy"}	{"Management or Restoration"}
1976396	BACI design reveals the decline of the seagrass Posidonia oceanica induced by anchoring	2008	{"Albertelli, Giancarlo","Bianchi, Carlo Nike","Chiantore, Mariachiara","Lanzone, Alessio","Montefalcone, Monica","Morri, Carla"}	{"Management or Restoration"}
1973582	A preliminary assessment of marine biodiversity to support the establishment of a marine protected area along the coast of Manduria (southeastern Italy, Ionian Sea).	2017	{"Bottalico, Antonella","Colao, Marcello","Colucci, Antonella","Lisco, Anna","Tarsitano, Elvira","de Gioia, Michele"}	{"Management or Restoration"}
1976670	Seagrass transplanting in Cockburn Sound, Western Australia: A comparison of manual transplantation methodology using Posidonia sinuosa Cambridge et Kuo	2007	{"Paling, Eric I.","Tunbridge, David J.","van Keulen, Michael"}	{"Management or Restoration"}
1972753	Temporal Dynamics of the Natural and Trimmed Angiosperm Zostera marina L. (Potamogetonales:Zosteraceae), and an Effective Technique for Transplantation of Long Shoots in a Temperate Tidal Zone (Northern China)	2019	{"LiU, Bingjian","Liu, Xujia","Zhang, Xiaomei","Zhou, Yi"}	{"Management or Restoration"}
1974861	Alert thresholds for monitoring environmental variables: A new approach applied to seagrass beds diversity in New Caledonia	2013	{"Andrefouet, Serge","Gilbert, Antoine","Guillemot, Nicolas","Payri, Claude","Van Wynsberge, Simon"}	{"Management or Restoration"}
1973760	Protecting Biscayne's Underwater Treasures	2017	{"Anderson, LE","Anderson, Laura E.","BA Manning, RE","Manning, Robert E.","Pettengill, PR","Pettengill, Peter R."}	{"Review or Book"}
1975056	Breeding high-quality Zostera marina plants by placing Zostera marina seeds in sterilized sea water and maintaining seeds under dark, sealed and specified photoperiod and temperature condition for specified days in presence of oxygen	NA	{"LIANG Z","LIU F","LIU K","MA X","SUN X","WANG F","WANG W"}	{"Ghost citation"}
1972823	Capsule type seed germination transplant apparatus useful for forming coastal sea forests, comprises capsule formed with accommodation space, seagrass seed provided in accommodation space, and fertilizer provided with the seagrass seed	NA	{"J, GU",KOOJAGEUN}	{"Ghost citation"}
1973520	Boat anchoring pressure on coastal seabed: Quantification and bias estimation using AIS data	2017	{"Boissery, Pierre","Deter, Julie","Holon, Florian","Inacio, Adrien","Lozupone, Xavier"}	{"Management or Restoration"}
1975649	The value of estuarine and coastal ecosystem services	2011	{"Barbier, Edward B.","Hacker, Sally D.","Kennedy, Chris","Koch, Evamaria W.","Silliman, Brian R.","Stier, Adrian C."}	{"Management or Restoration","Review or Book"}
1973687	Size, age, and habitat determine effectiveness of Palau's Marine Protected Areas	2017	{"Ballesteros, Enric","Caselle, Jennifer E.","Friedlander, Alan M.","Golbuu, Yimnang","Gouezo, Marine","Olsudong, Dawnette","Sala, Enric"}	{"Non Seagrass","Management or Restoration"}
1975986	Assessing the quality of seagrass data collected by community volunteers in Moreton Bay Marine Park, Australia	2010	{"Baltais, Simon J.","Coles, Louise","Finn, Paul G.","Price, Kera","Udy, Nicola S."}	{"Management or Restoration"}
1973004	Juvenile hawksbill residency and habitat use within a Caribbean marine protected area	2019	{"Hart, Kristen M.","Hillis-Starr, Zandy","Oli, Madan K.","Pollock, Clayton G.","Selby, Thomas H.","Smith, Brian J."}	{"Management or Restoration"}
1973655	Influence of substrate and burial on the development of Posidonia oceanica: implications for restoration	2017	{"Guerrero-Meseguer, Laura","Marin, Arnaldo","Sanz-Lazaro, Carlos","Suk-ueng, Krittawit"}	{"Management or Restoration"}
1975581	Assessment of regional and local biodiversity in tropical and subtropical coastal habitats in the East African Marine Ecoregion	2011	{"Bamber, Roger N.","Barnes, Natalie","Bennell, Graham","Cornelius, Nils","Ferrero, Timothy J.","Glassom, David","Henderson, Sophie Conroy-Dalton","Jiddawi, Narriman","Lee, Christine N. W.","Macia, Adriano","Msangameno, Daudi J.","Paula, Jose","Yahya, Saleh"}	{"Management or Restoration"}
1975470	An Evaluation of Leaf Biomass:Length Ratio as a Tool for Nondestructive Assessment in Eelgrass (Zostera marina L.)	2012	{"Echavarria-Heras, Hector","Franco-Vizcaino, Ernesto","Hosokawa, Shinya","Lee, Kun-Seop","Solana-Arellano, Elena"}	{"Management or Restoration"}
1975449	A Systematic Approach toward Detection of Seagrass Patches from Hyperspectral Imagery	2012	{"Li, Rongxing","Liu, Jung-Kuan","Sukcharoenpong, Anuchit","Yuan, Jiangye","Zhang, Shaoming","Zhu, Haihong"}	{"Management or Restoration"}
1976749	The importance of spatial scale for the conservation of tidal flat macrobenthos: An example from New South Wales, Australia	2007	{"Davis, Andrew R.","Jones, Alan R.","Lynch, Tim P.","Murray, Anna","Winberg, Pia C."}	{"Management or Restoration"}
1972900	Fine-scale genetic structure and flowering output of the seagrass Enhalus acoroides undergoing disturbance	2019	{"Cui, Lijun","Huang, Chi","Huang, Xiaoping","Jiang, Zhijian","Serrao, Ester A.","Thorhaug, Anitra","Wu, Yunchao","Yu, Shuo","Zhang, Jingping"}	{"Management or Restoration"}
1972498	Morphological and Physiological Responses of Enhalus acoroides Seedlings Under Varying Temperature and Nutrient Treatment	2020	{"Ambo-Rappe, Rohani","Artika, Suci Rahmadani","Moreira-Saporiti, Agustin","Teichberg, Mirta","Viana, Ines G."}	{"Management or Restoration"}
1972497	Influence of altitude on tropical marine habitat classification using imagery from fixed-wing, water-landing UAVs	2020	{"Ellis, Sophia L.","Letessier, Tom B.","Schiele, Melissa","Taylor, Michelle L."}	{"Management or Restoration"}
1973494	Timing anthropogenic stressors to mitigate their impact on marine ecosystem resilience	2017	{"Caley, M. Julian","Chartrand, Kathryn","Kendrick, Gary A.","McMahon, Kathryn","Mengersen, Kerrie","Rasheed, Michael A.","Wu, Paul Pao-Yen","York, Paul H."}	{"Management or Restoration","Review or Book"}
1974661	Impacts of Terrestrial and Shoreline Stressors on Eelgrass in Puget Sound: An Expert Elicitation	2014	{"Levin, Phillip S.","Rehr, Amanda P.","Tolimieri, Nick","Williams, Gregory D."}	{"Management or Restoration"}
1977525	Native eelgrass Zostera marina controls growth and reproduction of an invasive mussel through food limitation	2003	{"Allen, BJ","Williams, SL"}	{"Non Seagrass"}
1977611	Lessons learned: The effects of nutrient enrichment on the support of nekton by seagrass and salt marsh ecosystems	2002	{"Deegan, LA"}	{"Review or Book"}
1973140	Widespread recovery of seagrass coverage in Southwest Florida (USA): Temporal and spatial trends and management actions responsible for success	2018	{"Alderson, M.","Burnes, R.","Hecker, J.","Leverone, J.","Raulerson, G.","Sherwood, E.","Tomasko, D."}	{"Non Zostera","Management or Restoration"}
1976173	Associations of concern: declining seagrasses and threatened dependent species	2009	{"Duarte, Carlos M.","Heck, Kenneth L., Jr.","Hughes, A. Randall","Waycott, Michelle","Williams, Susan L."}	{"Management or Restoration"}
1975510	The sensitivity of marine N-2 fixation to dissolved inorganic nitrogen	2012	{"Knapp, Angela N."}	{"Non Zostera","No Stressor/Restoration"}
1976972	Effects of Lyngbya majuscula (Cyanophycea) blooms on sediment nutrients and meiofaunal assemblages in seagrass beds in Moreton Bay, Australia	2006	{"Garcia, R","Johnstone, RW"}	{"No Stressor/Restoration"}
1977012	Aquatic optics: Basic concepts for understanding how light affects seagrasses and makes them measurable from space	2006	{"BE Larkum, AW","Dekker, Arnold G.","Duarte, CM","Orth, RJ","Zimmerman, Richard C."}	{"Review or Book"}
1978981	EFFECT OF TEMPERATURE ON ZOSTERA-MARINA L. III. CHANGE OF THE LIFE CYCLE BY A RISE IN TEMPERATURE	1987	{"KAWASAKI Y"}	{"Technical Report"}
1976292	Effects of plant diversity on primary production and species interactions in brackish water angiosperm, communities	2009	{"Bostom, Christoffer","Gustafsson, Camilla","Salo, Tiina"}	{"Management or Restoration"}
1976381	Productivity, carbon assimilation and intra-annual change in tropical reef platform seagrass communities of the Torres Strait, north-eastern Australia	2008	{"Campbell, Stuart J.","Coles, Robert G.","Dew, Kara R.","Kerville, Simon P.","McKenzie, Len J.","Rasheed, Michael A."}	{"Non Zostera"}
1977274	ELM, an estuarine nitrogen loading model: Formulation and verification of predicted concentrations of dissolved inorganic nitrogen	2004	{"Bowen, JL","Cole, ML","Isaji, T","Kroeger, KD","Mazzilli, S","Tomasky, G","Valiela, I"}	{"Non Seagrass","Management or Restoration"}
1976779	Eutrophication in shallow coastal bays and lagoons: the role of plants in the coastal filter	2007	{"Anderson, Iris C.","McGlathery, Karen J.","Sundback, Kristina"}	{"Review or Book"}
1973138	Ten years of conservation efforts enhance seagrass cover and carbon storage in Thailand	2018	{"Aongsara, Supaphon","Prathep, Anchana","Rattanachot, Ekkalak","Stankovic, Milica"}	{"Management or Restoration"}
1974057	Integration of ecosystem-based models into an existing interactive web-based tool for improved aquaculture decision-making	2016	{"Bricker, Suzanne B.","Chadwick, Cary B.","Getchis, Tessa L.","Rose, Corim.","Rose, Julie M."}	{"Management or Restoration"}
1972982	Improved allometric proxies for eelgrass conservation (vol 23, pg 71, 2019)	2019	{"Echavarria-Heras, H.","Leal-Ramirez, C.","Montesinos-Lopez, A.","Villa-Diharce, E."}	{"Ghost citation",""}
1975502	Dual processes for cross-boundary subsidies: incorporation of nutrients from reef-derived kelp into a seagrass ecosystem	2012	{"Doropoulos, Christopher","Hyndes, Glenn A.","Lavery, Paul S."}	{"Non Zostera"}
1973103	OCLE: A European open access database on climate change effects on littoral and oceanic ecosystems	2018	{"Acevedo, Adrian","Juanes, Jose A.","Losada, Inigo J.","Puente, Araceli","Ramos, Elvira","de la Hoz, Camino F."}	{"Management or Restoration"}
1973685	A low cost field-survey method for mapping seagrasses and their potential threats: an example from the northern Gulf of Aqaba, Red Sea	2017	{"Beer, Sven","Edelist, Dor","Rilov, Gil","Shem-Tov, Rachamim","Winters, Gidon"}	{"No Stressor/Restoration"}
1973453	Herbivore community determines the magnitude and mechanism of nutrient effects on subtropical and tropical seagrasses	2018	{"Altieri, Andrew H.","Campbell, Justin E.","Duffy, J. Emmett","Johnston, Lane N.","Kuempel, Caitlin D.","Paperno, Richard","Paul, Valerie J."}	{"Non Zostera"}
1974613	The future of the northeast Atlantic benthic flora in a high CO2 world	2014	{"Anderson, Kathryn M.","Asnaghi, Valentina","Brodie, Juliet","Brownlee, Colin","Burdett, Heidi L.","Burrows, Michael T.","Collins, Sinead","Cunliffe, Michael","Donohue, Penelope J. C.","Foggo, Andrew","Hall-Spencer, Jason M.","Harvey, Ben","Kamenos, Nicholas A.","Mieszkowska, Nova","Noisette, Fanny","Nunes, Joana","Ragazzola, Federica","Raven, John A.","Santos, Rui","Schmidt, Daniela N.","Smale,…	{"Review or Book"}
1974316	Rapid monitoring of seagrass biomass using a simple linear modelling approach, in the field and from space	2015	{"Kovacs, Eva","Lyons, Mitchell","Maxwell, Paul","Phinn, Stuart","Roelfsema, Chris","Samper-Villarreal, Jimena","Saunders, Megan"}	{"Management or Restoration"}
1973418	ALTERATION OF HYDROLOGICAL CONDITIONS AND SPREADING PROCESSES IN VEGETATED NATURAL FLOWS	2018	{"Ben Meftah, Mouldi","De Serio, Francesca","Mossa, Michele"}	{"Management or Restoration"}
1973007	Seagrass-microbial interactions in the rhizosphere	2019	{"Ahmad, Manzoor","Ding, Dewen","Dong, Junde","Lin, Xiancheng","Ling, Juan","Yang, Qingsong","Zhang, Yanying","Zhang, Ying","Zhou, Weiguo"}	{"Management or Restoration"}
1973362	Non-seagrass carbon contributions to seagrass sediment blue carbon	2018	{"Bost, Molly","McGlathery, Karen J.","McKee, Brent A.","Oreska, Matthew P. J.","Wilkinson, Grace M."}	{"No Stressor/Restoration"}
1972467	A box-model of carrying capacity of the Thau lagoon in the context of ecological status regulations and sustainable shellfish cultures	2020	{"Bec, Beatrice","Cesmat, Ludovic","Derolez, Valerie","Fiandrino, Annie","Guyondet, Thomas","Lagarde, Franck","Pete, Romain","Pouvreau, Stephane","Richard, Marion"}	{"Management or Restoration"}
2545971	Seascape metrics, spatio-temporal change, and intensity of use for the spatial conservation prioritization of a Caribbean marine protected area	2020	{"Hinojosa-Arango, Gustavo","Ortiz Cajica, Angela Karina","Rioja-Nieto, Rodolfo","Rodrigo Garza-Perez, Joaquin"}	{"Non Zostera"}
2545911	Assessing the natural capital value of water quality and climate regulation in temperate marine systems using a EUNIS biotope classification approach	2020	{"Beaumont, Nicola J.","Preston, Joanne","Watson, Gordon J.","Watson, Stephen C. L."}	{"No Stressor/Restoration"}
1977564	Monitoring changes in the fully protected zones of the Florida Keys National Marine Sanctuary	2003	{"BE Creswell, RL","Causey, B","Delaney, J","Keller, BD"}	{"No Stressor/Restoration"}
1978383	Predicting population decline: Seagrass demographics and the reconstructive technique	1996	{"Bell, SS","Jensen, SL","Robbins, BD"}	{"No Stressor/Restoration"}
1979294	RESTORATION OF SEAGRASSES WITH ECONOMIC ANALYSIS	1976	{"AUSTIN C B","THORHAUG A"}	{"No Stressor/Restoration"}
1976858	Hydroponic versus rooted growth of Zostera marina L. (Eelgrass)	2006	{"Biber, Patrick D."}	{"No Stressor/Restoration"}
1976933	Landscape-level seagrass-sediment relations in a coastal lagoon	2006	{"Bradley, MP","Stolt, MH"}	{"No Stressor/Restoration"}
2100418	Method for cultivating eelgrass, involves screening grass granules, soaking seeds in water, and germinating under UV light, uniformly seeding treated seed on medium, adding culture solution, culturing and screening	NA	{"HE W"}	{"Management or Restoration"}
2100315	Distribution status of seagrass and its relationship with different habitat types in Liusha bay of Guangdong province.	2019	{"Chen Qing-hua","Liao Yan","Qi Shi-bin","Sun Kai-feng","Xu Min","Yin Qian-ting","Zhong Chao"}	{"Non Zostera"}
1979183	REVIEW OF RESTORATION OF SEAGRASSES	1981	{"THORHAUG A"}	{"Management or Restoration"}
1978055	Management issues in aquatic macrophyte ecology: a Canadian perspective	1999	{"Chambers, PA","DeWreede, RE","Irlandi, EA","Vandermeulen, H"}	{"Management or Restoration",Review}
1976573	Seagrasses and eutrophication	2007	{"Burkholder, JoAnn M.","Tomasko, David A.","Touchette, Brant W."}	{Review}
1975408	A Meta-Analysis of Seaweed Impacts on Seagrasses: Generalities and Knowledge Gaps	2012	{"Arenas, Francisco","Engelen, Aschwin H.","Holmer, Marianne","Kotta, Jonne","McGlathery, Karen J.","Sillimann, Brian R.","Thomsen, Mads S.","Tuya, Fernando","Vanderklift, Mat A.","Wernberg, Thomas"}	{Review}
1972482	Facilitating foundation species: The potential for plant-bivalve interactions to improve habitat restoration success	2020	{"Bengil, Elizabeth G. T.","Bostrom, Christoffer","Carugati, Laura","Christianen, Marjolijn J. A.","Danovaro, Roberto","Gagnon, Karine","Gambi, Cristina","Govers, Laura L.","Kipson, Silvija","Kizilkaya, Inci Tuney","Meysick, Lukas","Pajusalu, Liina","Rinde, E.","van Katwijk, Marieke M.","van de Koppel, Johan","van der Heide, Tjisse"}	{"Management or Restoration"}
1972599	Effects of boat traffic and mooring infrastructure on aquatic vegetation: A systematic review and meta-analysis	2020	{"Hansen, Joakim P.","Sagerman, Josefin","Wikstrom, Sofia A."}	{Review}
1976581	Contribution of genetics and genomics to seagrass biology and conservation	2007	{"Olsen, Jeanine L.","Procaccini, Gabriele","Reusch, Thorsten B. H."}	{"Management or Restoration"}
1974302	Paradigms in the Recovery of Estuarine and Coastal Ecosystems	2015	{"Borja, Angel","Carstensen, Jacob","Duarte, Carlos M.","Elliott, Michael","Krause-Jensen, Dorte","Marba, Nuria"}	{"Management or Restoration"}
1974029	Global analysis of seagrass restoration: the importance of large-scale planting	2016	{"Althuizen, Inge H. J.","Balestri, Elena","Bernard, Guillaume","Cambridge, Marion L.","Cunha, Alexandra","Duarte, Carlos M.","Durance, Cynthia","Giesen, Wim","Han, Qiuying","Hosokawa, Shinya","Kendrick, Gary A.","Kiswara, Wawan","Komatsu, Teruhisa","Lardicci, Claudio","Lee, Kun-Seop","Marba, Nuria","Meinesz, Alexandre","Nakaoka, Masahiro","O'Brien, Katherine R.","Orth, Robert J.","Paling, Erik I…	{"Management or Restoration",Review}
1978926	HABITAT VALUE OF NATURAL VERSUS RECENTLY TRANSPLANTED EELGRASS, ZOSTERA-MARINA, FOR THE BAY SCALLOP, ARGOPECTEN-IRRADIANS	1989	{"FONSECA, MS","RITTMASTER, KA","RIVERA, JA","SMITH, I"}	{"Management or Restoration"}
1978129	Studies on germination and root development in the surfgrass Phyllospadix torreyi: implications for habitat restoration	1998	{"Anghera, M","Holbrook, SJ","Reed, DC","Solomon, E"}	{"Management or Restoration"}
1977862	An upgraded method to relocate marked shoots of the seagrass Zostera marina	2000	{"Echavarria-Heras, H","Flores-Uzeta, O","Solana-Arellano, E"}	{"Management or Restoration"}
1975460	Terrestrial pollutant runoff to the Great Barrier Reef: An update of issues, priorities and management responses	2012	{"Bainbridge, Z. T.","Bohnet, I. C.","Brodie, J. E.","Davis, A. M.","Devlin, M. J.","Kroon, F. J.","Lewis, S. E.","Schaffelke, B.","Waterhouse, J.","Wolanski, E. C."}	{"Management or Restoration"}
1973585	Submersed Aquatic Vegetation in Chesapeake Bay: Sentinel Species in a Changing World	2017	{"Dennison, William C.","Gurbisz, Cassie","Hannam, Michael","Keisman, Jennifer","Landry, J. Brooke","Lefcheck, Jonathan S.","Moore, Kenneth A.","Murphy, Rebecca R.","Orth, Robert J.","Patrick, Christopher J.","Testa, Jeremy","Weller, Donald E.","Wilcox, David J."}	{"Management or Restoration",Review}
1978173	Genetic diversity and structure of natural and transplanted eelgrass populations in the Chesapeake and Chincoteague bays	1998	{"Orth, RJ","Williams, SL"}	{"Management or Restoration"}
1975103	Aquaculture of Posidonia australis Seedlings for Seagrass Restoration Programs: Effect of Sediment Type and Organic Enrichment on Growth	2013	{"Cambridge, Marion L.","Dixon, Kingsley W.","Kendrick, Gary A.","Statton, John"}	{"Management or Restoration"}
1975030	Managing for Interactions between Local and Global Stressors of Ecosystems	2013	{"Brown, Christopher J.","Possingham, Hugh P.","Richardson, Anthony J.","Saunders, Megan I."}	{"Management or Restoration"}
1974945	Effectiveness and consistency of a suite of descriptors for assessing the ecological status of seagrass meadows (Posidonia oceanica L. le)	2013	{"Barrote, Isabel","Belmonte, Alessandro","Micheli, Carla","Migliore, Luciana","Peirano, Andrea","Rotini, Alice","Santos, Rui O.","Silva, Joao"}	{"Management or Restoration"}
1974862	Protection Enhances Community and Habitat Stability: Evidence from a Mediterranean Marine Protected Area	2013	{"Bevilacqua, Stanislao","Boero, Ferdinando","Fraschetti, Simonetta","Guarnieri, Giuseppe","Terlizzi, Antonio"}	{"Management or Restoration"}
1975919	Innovative Techniques for Large-scale Seagrass Restoration Using Zostera marina (eelgrass) Seeds	2010	{"Marion, Scott R.","Orth, Robert J."}	{"Management or Restoration"}
1975835	Variability in the structure of epiphytic assemblages of Posidonia oceanica in relation to human interferences in the Gulf of Gabes, Tunisia	2010	{"Aleya, Lotfi","Ben Brahim, Mounir","Bouain, Abderrahmen","Hamza, Asma","Hannachi, Imen","Jarboui, Othman","Rebai, Ahmed"}	{"Non Zostera"}
1975212	NUSA PENIDA MARINE PROTECTED AREA (MPA) BALI - INDONESIA: WHY NEED TO BE PROTECTED?	2013	{"Basuki, Riyanto","Ruchimat, Toni","Welly, Marthen"}	{"No Stressor/Restoration"}
1974409	The Great Barrier Reef World Heritage Area seagrasses: Managing this iconic Australian ecosystem resource for the future	2015	{"Bryant, Catherine","Coles, Robert G.","Grech, Alana","McKenna, Skye","McKenzie, Len J.","Rasheed, Michael A.","Sheaves, Marcus","York, Paul H."}	{"Management or Restoration"}
1974405	Restoration of the Seagrass Amphibolis antarctica-Temporal Variability and Long-Term Success	2015	{"Tanner, Jason E."}	{"Management or Restoration"}
1975914	Early warning response of Posidonia oceanica epiphyte community to environmental alterations (Ligurian Sea, NW Mediterranean)	2010	{"Albertelli, G.","Bianchi, C. N.","Giovannetti, E.","Montefalcone, M.","Morri, C."}	{"Management or Restoration"}
1975381	Experimental Evaluation of the Restoration Capacity of a Fish-Farm Impacted Area with Posidonia oceanica (L.) Delile Seedlings	2012	{"Celdran, David","Dominguez, Marta","Infantes, Eduardo","Marin, Arnaldo","Martinez-Banos, Pedro","Munoz-Vera, Ana","Terrados, Jorge"}	{"Management or Restoration"}
1975139	An integrative method for the evaluation, monitoring, and comparison of seagrass habitat structure	2013	{"Gaylard, Sam G.","Irving, Andrew D.","Tanner, Jason E."}	{"Management or Restoration"}
1977239	Meadow fragmentation and reproductive output of the SE Asian seagrass Enhalus acoroides	2004	{"Alberto, F","Billot, C","Lacap, CDA","Nacorda, HME","Rollon, RN","Terrados, J","Vermaat, JE","Wiegman, F"}	{"Non Zostera"}
1977138	Architectural characteristics of two bed types of the seagrass Posidonia oceanica over different spatial scales	2005	{"Attrill, MJ","Borg, JA","Jones, MB","Rowden, AA","Schembri, PJ"}	{"Management or Restoration"}
1975348	Managing nitrogen inputs into seagrass meadows near a coastal city: Flow-on from research to environmental improvement plans	2012	{"Collings, G.","Nayar, S.","Pfennig, P.","Royal, M."}	{"Management or Restoration"}
1974372	Climate Change Projected Effects on Coastal Foundation Communities of the Greater Everglades Using a 2060 Scenario: Need for a New Management Paradigm	2015	{"Coronado, C.","Halley, R. B.","Koch, M. S.","Miller, M. W.","Rudnick, D. T.","Sklar, F. H.","Stabenau, E."}	{"Management or Restoration"}
1974090	Management of Marine Protected Zones - Case Study of Bahrain, Arabian Gulf	2016	{"BE Marghany, M","Naser, Humood A."}	{"Management or Restoration"}
1975455	Seagrass habitats in the Arabian Gulf: distribution, tolerance thresholds and threats	2012	{"Erftemeijer, Paul L. A.","Shuail, Dawood A."}	{"Management or Restoration"}
1975747	Arsenic distribution and species in two Zostera capricorni seagrass ecosystems, New South Wales, Australia	2011	{"Chariton, Anthony A.","Duncan, Elliot G.","Foster, Simon D.","Krikowa, Frank","Maher, William A.","Taylor, Anne M."}	{"No Stressor/Restoration"}
1976453	An effective transplanting technique using shells for restoration of Zostera marina habitats	2008	{"Lee, Kun-Seop","Park, Jung-Im"}	{"Management or Restoration"}
1974735	Effects of Sediment Fertilization and Burial on Cymodocea nodosa Transplants; Implications for Seagrass Restoration Under a Changing Climate	2014	{"Balestri, Elena","Lardicci, Claudio"}	{"Management or Restoration"}
1974677	The role of seagrasses in coastal protection in a changing climate	2014	{"Bouma, Tjeerd J.","Galvan, Cristina","Lara, Javier L.","Losada, Inigo J.","Maza, Maria","Ondiviela, Barbara","van Belzen, Jim"}	{"Management or Restoration","Review or Book"}
1974294	The importance of genetic make-up in seagrass restoration: a case study of the seagrass Zostera noltei	2015	{"Bernard, Guillaume","Jahnke, Marlene","Procaccini, Gabriele","Serra, Ilia Anna"}	{"Management or Restoration"}
1974185	Impacts of physical disturbance on ecosystem structure in subtropical seagrass meadows	2015	{"Bourque, Amanda S.","Fourqurean, James W.","Kenworthy, W. Judson"}	{"Non Zostera"}
1974711	Quantitative estimate of commercial fish enhancement by seagrass habitat in southern Australia	2014	{"Blandon, Abigayil","Ermgassen, Philine S. E. Zu"}	{"Management or Restoration"}
1974870	An Experimental Transplantation to Select the Optimal Site for Restoration of the Eelgrass Zostera marina in the Taehwa River Estuary	2013	{"Kim, Jeong Bae","Lee, Kun-Seop","Park, Jung-Im","Son, Min Ho"}	{"Management or Restoration"}
1974693	Seagrasses in Portugal: A most endangered marine habitat (Reprinted from Aquatic Botany, vol 104, pg 193-203, 2013)	2014	{"Assis, Jorge F.","Cunha, Alexandra H.","Serrao, Ester A."}	{"Management or Restoration"}
1973947	Capturing ecological complexity: OCI, a novel combination of ecological indices as applied to benthic marine habitats	2016	{"Bianchi, C. N.","Fabiano, M.","Morri, C.","Morten, A.","Paoli, C.","Vassallo, P."}	{"Management or Restoration"}
1977968	Seagrass restoration in Tampa Bay: A resource-based approach to estuarine management	2000	{"BE Bortone, SA","Greening, HS","Johansson, JOR"}	{"Management or Restoration"}
1977962	Monitoring the effects of construction and operation of a marina on the seagrass Halophila decipiens in Fort Lauderdale, Florida	2000	{"BE Bortone, SA","Deis, DR"}	{"Management or Restoration"}
1977912	Establishing pollutant load reduction targets for the Indian River Lagoon, Florida	2000	{"Sigua, GC","Steward, JS"}	{"Management or Restoration"}
1978837	THE BALANCE OF NUTRIENT LOSSES AND GAINS IN SEAGRASS MEADOWS	1991	{"HARRISON, PG","HEMMINGA, MA","VANLENT, F"}	{"Review or Book"}
1977835	Field verification of a light-driven model of biomass changes in the seagrass Halodule wrightii	2001	{"Burd, AB","Dunton, KH"}	{"Management or Restoration"}
1974515	Using the value of Lin's concordance correlation coefficient as a criterion for efficient estimation of areas of leaves of eelgrass from noisy digital images.	2014	{"Castillo, Oscar","Echavarria-Heras, Hector","Leal-Ramirez, Cecilia","Villa-Diharce, Enrique"}	{"Management or Restoration"}
1973932	Prioritizing localized management actions for seagrass conservation and restoration using a species distribution model	2016	{"Adams, Matthew P.","Callaghan, David P.","Grinham, Alistair R.","Leon, Javier","Maxwell, Paul S.","O'Brien, Katherine R.","Roelfsema, Chris M.","Saunders, Megan I.","Tuazon, Daniel"}	{"Management or Restoration"}
1973487	Species richness accelerates marine ecosystem restoration in the Coral Triangle	2017	{"Abbott, Jessica M.","Ambo-Rappe, Rohani","Limbong, Steven R.","Sur, Christine","Williams, Susan L."}	{"Management or Restoration"}
1973299	A New and Effective Transplanting Technique Using Wire Netting for Restoration of the Surfgrass, Phyllospadix japonicus, in Exposed Rocky Shores	2018	{"Kim, Jae Hoon","Kim, Jong-Hyeob","Park, Jung-Im","Shim, Jeong Hee"}	{"Management or Restoration"}
1973287	A sediment bioturbator bottleneck to seedling recruitment for the seagrass Posidonia australis	2018	{"Johnson, A. J.","Kendrick, G. A.","Orth, R. J.","Statton, J."}	{"Management or Restoration"}
1974933	Evolution of Posidonia oceanica seagrass meadows and its implications for management	2013	{"Codina, Ana","Eduardo Guillen, Juan","Jacobo Zubcoff, Jose","Jimenez, Santiago","Martinez, Joaquin","Montero, Mercedes","Sanchez Lizaso, Jose Luis","Soler, Gabriel","Trivino, Alejandro"}	{"Management or Restoration"}
1974844	EVALUATING COASTAL HABITAT VALUE THROUGH METRICS OF ECOSYSTEM FUNCTION FOR USE IN HABITAT RESTORATION	2014	{Anonymous}	{"Management or Restoration"}
1978931	EMERGENCE AND SUBMERGENCE EFFECTS ON THE DISTRIBUTIONAL PATTERNS AND EXCHANGE OF PHOSPHORUS IN THE SEAGRASS ZOSTERA-NOLTII HORNEM	1989	{"NIELL F X","PEREZ-LLORENS J L"}	{Conference}
1976344	Ecophysiological status of nine species of macroalgae and seagrasses in Moreton Bay, Queensland, Australia	2008	{"Kevekordes, Karen","Phillips, Julie A.","Quigg, Antonietta"}	{Conference}
1976712	Effects of restoration management on the estuarine isopod Cyathura carinata: mediation by trematodes and habitat change	2007	{"Baeta, A.","Brandao, A.","Ferreira, S. M.","Jensen, K. T.","Lillebo, A. I.","Neto, J. M.","Pardal, M. A."}	{"Management or Restoration"}
1976192	Survival and Expansion of Mechanically Transplanted Seagrass Sods	2009	{"Fonseca, Mark S.","Hall, Margaret O.","Merello, Manuel F.","Uhrin, Amy V."}	{"Management or Restoration"}
1976035	Restoration experiment of Zostera marina L. in a subtropical coastal lagoon	2010	{"Hinojosa-Arango, Gustavo","Muniz-Salazar, Raquel","Riosmena-Rodriguez, Rafael","Rodriguez-Salinas, Paola"}	{"Management or Restoration"}
1975648	Storm-generated fragments of the seagrass Posidonia oceanica from beach wrack - A potential source of transplants for restoration	2011	{"Balestri, E.","Lardicci, C.","Vallerini, F."}	{"Management or Restoration"}
1973815	Opportunities for Protecting and Restoring Tropical Coastal Ecosystems by Utilizing a Physical Connectivity Approach	2017	{"Bouma, Tjeerd J.","Breckwoldt, Annette","Gillis, Lucy G.","Jones, Clive G.","Ziegler, Alan D.","van der Wal, Daphne"}	{"Management or Restoration"}
1972859	Predicting the response of nekton assemblages to seagrass transplantations in the Venice lagoon: An approach to assess ecological restoration	2019	{"Franzoi, Piero","Scapin, Luca","Sfriso, Adriano","Zucchetta, Matteo"}	{"Management or Restoration"}
1972672	A Machine Learning approach to the assessment of the vulnerability of Posidonia oceanica meadows	2020	{"Catucci, Elena","Scardi, Michele"}	{"Management or Restoration"}
1972608	The influence of seagrass donor source on small-scale transplant resilience	2020	{"Cebrian, Just","Christiaen, Bart","Major, Kelly M.","McDonald, Ashley M."}	{"Management or Restoration"}
1976488	Posidonia oceanica seeds from drift origin: viability, germination and early plantlet development	2008	{"Belzunce, Miriam","Navarro, Rafael M.","Rapoport, Hava F."}	{"Management or Restoration"}
1977627	The state of the art of aquatic and semi-aquatic ecological restoration projects in the Netherlands	2002	{"Bakker, JP","Grootjans, AP","Gulati, RD","Nienhuis, PH","de Jonge, VN"}	{"Management or Restoration"}
1978988	Q-10 RESPONSES TO TEMPERATURE AND THE INTERACTION BETWEEN LIGHT AND TEMPERATURE IN REGULATING GROWTH OF THE TEMPERATE SEAGRASS ZOSTERA-MARINA	1987	{"ALBERTE R S","SMITH R D","ZIMMERMAN R C"}	{Conference}
1973045	Preliminary study on seed-based restoration for Enhalus acoroides meadow	2019	{"Cui Lijun","Huang Xiaoping","Jiang Zhijian","Yu Shuo","Zhang Jingping","Zhang Ling"}	{"Management or Restoration"}
1976619	Recruitment facilitation as a means of seagrass rehabilitation	2007	{"Collings, Greg","Tanner, Jason E.","Venema, Sonja","Wear, Rachel"}	{"Management or Restoration"}
1975513	Changes in Morphological Characteristics and Productivity of Zostera caespitosa Transplants	2012	{"Lee, Kun-Seop","Park, Jung-Im","Son, Min-Ho",Î∞ïÏû¨ÏòÅ}	{"Management or Restoration"}
1976349	INVESTIGATOR GROUP EXPEDITION 2006: APPLICATION OF REMOTE SURVEY TECHNIQUES TO CHARACTERISE THE BENTHIC HABITATS	2008	{"Miller, D. J.","Wright, A."}	{"Management or Restoration"}
1979244	GEO MORPHOLOGICAL CONDITIONS OF THE DRYING-UP SEA BED IN SOUTHEASTERN ARAL SEA REGION UZBEK-SSR USSR	1979	{"GRYAZNOVA T P"}	{"Not accessible",Conference}
1979011	EFFECTS OF TEMPERATURE ON ZOSTERA-MARINA L. II. VEGETATIVE GROWTH AND REPRODUCTION	1986	{"GOTO H","IITUKA T","KAWASAKI Y","SHIMO S","TERAWAKI T"}	{"Ghost citation"}
1978542	Use of vessels of pressurized peat in the transplantation of Zostera noltii	1995	{"Tagliapietra, Davide"}	{"Ghost citation"}
1975395	Evaluation of a new-type seagrass seeding technique based on eelgrass seedling rate	2012	{"Fang Ke-jun","Han Hou-wei","Han Xiao-bing","Jiang Xin","Li Xiao-jie","Pan Jin-hua","Sai Shan","Zhang Wen-feng"}	{"Ghost citation"}
1976239	Valuation of the Tropical Area of Zostera marina (Lagoon of Venice, Italy and Lagoon of Thau, France)	2009	{"Facca, Chiara","Sfriso, Adriano","de Casabianca, Marie-Luce"}	{"Ghost citation"}
1975540	Seed germination, seedling culturing and sea grass recovery method for zostera marina, involves utilizing zostera marina plant seed in natural sea area to recover grass grassland at four culture stages	NA	{"LIU B","LIU X","LIU Y","XU Q","YANG H","ZHANG F","ZHANG M","ZHANG T","ZHOU Y"}	{"Ghost citation"}
1975304	Sterile seedling zostera marina cultivating method, involves washing zostera marina seed for two times by sterilized sea water, and placing processed seed in constant temperature culture box at specific degrees Celsius	NA	{"CUI C","HAN H","JIANG X","JIN G","LI X","LIU Y","LUO S","PAN J","QIAN R","ZHANG L"}	{"Ghost citation"}
1973402	Seeding body for kelps, such as Zostera, includes mixed soil of steel making slag and marine sediment, with steel making slag having prescribed mass percentage in mixed soil having prescribed hardness	NA	{"SUZUMURA M","TANIMOTO T","TSUKAZAKI A","TSURUSHIMA N","YAMADA N"}	{"Ghost citation"}
1973157	Material for transplanting seagrass, comprises mesh support having holes formed for allowing water and nutrients to flow in and out and having receiving space, filling material and seagrass adhered to filler and receiving space	NA	{"CHOI O I","KIM J R","KIM K H"}	{"Ghost citation"}
1972939	Method for constructing Zostera marina seagrass bed, involves selecting sea area and selecting Zostera marina variety, followed by tying Zostera marina with nylon rope, placing in cage, sealing cage and performing daily management	NA	{"H, HUANG","H, XU","J, HE","L, SUN","W, SHI","X, ZHOU","Y, LIU"}	{"Ghost citation"}
1977730	Implementing a voluntary, nonregulatory approach to nitrogen management in Tampa Bay, FL: A public/private partnership.	2001	{"DeGrove, Bruce D.","Greening, Holly"}	{"Management or Restoration"}
1978053	Apparent lack of vesicular-arbuscular mycorrhiza (VAM) in the seagrasses Zostera marina L. and Thalassia testudinum Banks ex Konig	1999	{"Nielsen, SL","Thingstrup, I","Wigand, C"}	{"No Stressor/Restoration"}
1973573	Community- and government-managed marine protected areas increase fish size, biomass and potential value	2017	{"Chirico, Angelica A. D.","Eklof, Johan S.","McClanahan, Timothy R."}	{"Management or Restoration"}
1972779	Optimising Seagrass Conservation for Ecological Functions	2019	{"Connolly, Rod M.","Gilby, Ben L.","Henderson, Christopher J.","Lee, Shing Y.","Maxwell, Paul S.","Olds, Andrew D.","Schlacher, Thomas A.","Stevens, Tim","Warnken, Jan"}	{"Management or Restoration"}
1973255	Light Is More Important Than Nutrient Ratios of Fertilization for Cymodocea nodosa Seedling Development	2018	{"Alexandre, Ana","Santos, Rui","Silva, Joao"}	{"Management or Restoration"}
1976282	Seagrass Distribution in Deukryang Bay	2009	{"Kim, Jeong-Bae","Lee, Kun-Seop","Park, Jung-Im"}	{"Management or Restoration"}
1975497	Restoring Resiliency: Case Studies from Pacific Northwest Estuarine Eelgrass (Zostera marina L.) Ecosystems	2012	{"Borde, Amy B.","Diefenderfer, Heida L.","Thom, Ronald M.","Vavrinec, John"}	{"Management or Restoration"}
1973507	Identifying critical recruitment bottlenecks limiting seedling establishment in a degraded seagrass ecosystem	2017	{"Dixon, Kingsley W.","Kendrick, Gary A.","Montoya, Leonardo R.","Orth, Robert J.","Statton, John"}	{"Management or Restoration"}
1976155	Evaluation of blast furnace slag as basal media for eelgrass bed	2009	{"Hizon-Fradejas, Amelia B.","Nakai, Satoshi","Nakano, Yoichi","Nishijima, Wataru","Okada, Mitsumasa"}	{"Management or Restoration"}
1972539	Reconciling Tourism Development and Conservation Outcomes Through Marine Spatial Planning for a Saudi Giga-Project in the Red Sea (The Red Sea Project, Vision 2030)	2020	{"Al-Suwailem, Abdulaziz M.","Albaseet, Raed","Brainard, Russell E.","Butt, Faisal","Chalastani, Vasiliki","Coccossis, Harry","Duarte, Carlos M.","Hale, Jason A.","Henshaw, Scott D.","Manetos, Panos","Pagano, John","Tsoukala, Vasiliki K.","Vijayan, Abhishekh P.","Williamson, Ian"}	{"Management or Restoration"}
1978005	Nitrogen cycling in coastal marine ecosystems	1999	{"Herbert, RA"}	{"Review or Book"}
1978355	Stable carbon isotopes in seagrasses: Variability in ratios and use in ecological studies	1996	{"Hemminga, MA","Mateo, MA"}	{"Review or Book"}
1976665	The primacy of top-down effects in shallow benthic ecosystems	2007	{"Heck, K. L., Jr.","Valentine, J. F."}	{"Review or Book"}
1977867	Microbiological and environmental variables involved in the sulfide buffering capacity along a eutrophication gradient in a coastal lagoon (Bassin d'Arcachon, France)	2000	{"Heijs, SK","van Gemerden, H"}	{"No Stressor/Restoration"}
1973216	An empirical model using dissolved oxygen as an indicator for eutrophication at a regional scale	2018	{"Coffin, Michael R. S.","Courtenay, Simon C.","Pater, Christina C.","van den Heuvel, Michael R."}	{"No Stressor/Restoration"}
1977653	Mapping the intertidal vegetation of the harbours of southern England for water quality management	2002	{"Baily, Brain","Collier, Peter","Fontana, Dominic","Pearson, Alastair"}	{"No Stressor/Restoration"}
1975164	Septic Systems in the Coastal Environment: Multiple Water Quality Problems in Many Areas	2013	{"BA Ahuja, S","Mallin, Michael A."}	{"Management or Restoration","Review or Book"}
1976618	Changing eelgrass (Zostera marina) distribution in a Maine estuary over the last half century: Rates of decline and potential causes	2007	{"Barker, Seth","Goodrich, Tara","Osher, Laurie J."}	{Conference}
1976899	Consumer diversity mediates invasion dynamics at multiple trophic levels	2006	{"Duffy, J. Emmett","France, Kristin E."}	{"No Stressor/Restoration"}
1976710	Biodiversity and food web structure influence short-term accumulation of sediment organic matter in an experimental seagrass system	2007	{"Canuel, Elizabeth A.","Duffy, J. Emmett","Spivak, Amanda C.","Waterson, Elizabeth J."}	{"No Stressor/Restoration"}
1976960	Ecosystem model specification with an agent based framework.	2006	{"BA Gray, R.","Fulton, E.","Fulton, E.","Gray, R.","Little, R.","Little, R.","Scott, R.","Scott, R."}	{"Management or Restoration"}
1973465	Seagrass blue carbon dynamics in the Gulf of Mexico: Stocks, losses from anthropogenic disturbance, and gains through seagrass restoration	2017	{"Berlyn, Graeme P.","Ku, Timothy C. W.","Lopez-Portillo, Jorge","Poulos, Helen M.","Thorhaug, Anitra"}	{"Management or Restoration"}
1975550	Research progress in seegrass seed dormancy, germination, and seedling growth and related affecting factors	2011	{"Niu Shu-na","Sun Yan","Zhang Pei-dong","Zhang Xiu-mei"}	{"Review or Book"}
1975229	Short-term interactions between phytoplankton and intertidal seagrass vegetation in a coastal lagoon (Bassin d'Arcachon, SW France)	2012	{"Buffan-Dubau, Evelyne","Courties, Claude","Lemaire, Emmanuelle","Troussellier, Marc","de Wit, Rutger"}	{"No Stressor/Restoration"}
1973676	Review of nutrient enrichment and global warming effects on seagrasses	2017	{"Han Qiu-ying","Liu Wei-yan","Sun Xi-yan","Tang Yu-qin"}	{"Review or Book"}
1976260	Nitrogen and Phosphorus Exchange Among Tropical Coastal Ecosystems	2009	{"BE Nagelkerken, I","Davis, Stephen E., III","Lirman, Diego","Wozniak, Jeffrey R."}	{"Review or Book"}
1975850	Consumer identity, abundance and nutrient concentration affect epiphyte diversity in an experimental eelgrass system	2010	{"Floeder, Sabine","Jaschinski, Sybill","Sommer, Ulrich"}	{"Non Seagrass"}
1972578	Difficulties to identify global and local key biodiversity areas in diverse and isolated marine jurisdictions	2020	{"Becerro, Mikel A.","Delgado, Juan D.","Herrera, Rogelio","Moro, Leopoldo","Riera, Rodrigo"}	{"Management or Restoration"}
1976319	Linking clonal growth patterns and ecophysiology allows the prediction of meadow-scale dynamics of seagrass beds	2009	{"Vermaat, Jan E."}	{"Review or Book"}
1973225	Parameterization of an optical model to refine seagrass habitat requirements in an urbanized coastline	2018	{"Caires, Sofia","Daly, Rob","Erftemeijer, Paul L. A.","Fernandes, Milena B.","Kildea, Tim","van Gils, Jos"}	{"Non Zostera"}
1977945	Habitat suitability of the Wadden Sea for restoration of Zostera marina beds	2000	{"Asmus, RM","Hermus, DCR","de Jong, DJ","de Jonge, VN","van Katwijk, MM"}	{"No Stressor/Restoration"}
2100410	Biogeographical scenarios modulate seagrass resistance to small-scale perturbations	2019	{"Antich, Adria","Castejon, Ines","Csenteri, Ina","Curbelo, Leticia","Espino, Fernando","Fernandez-Torquemada, Yolanda","Manent, Pablo","Procaccini, Gabriele","Royo, Laura","Terrados, Jorge","Tomas, Fiona","Tuya, Fernando","Zarcero, Jestis","de la Ossa, Jose A.","del Pilar-Ruso, Yoana"}	{"Non Zostera"}
1978128	Survival and growth of transplanted and natural seedlings of Posidonia oceanica (L.) Delile in a damaged coastal area	1998	{"Balestri, E","Cinelli, F","Piazzi, L"}	{"No Stressor/Restoration"}
2100270	Aquatic Angiosperm Transplantation: A Tool for Environmental Management and Restoring in Transitional Water Systems	2019	{"Berto, Daniela","Bonometto, Andrea","Brusa, Rossella Boscolo","Buosi, Alessandro","Cacciatore, Federica","Facca, Chiara","Franzoi, Piero","Gion, Claudia","Juhmani, Abdul-Salam","Oselladore, Federica","Ponis, Emanuele","Rampazzo, Federico","Scapin, Luca","Sfriso, Adriano","Sfriso, Andrea Augusto","Tomio, Yari"}	{"No Stressor/Restoration"}
1976443	Assessing effects of fishing prohibition on Posidonia oceanica seagrass meadows in the Marine Natural Reserve of Cerbere-Banyuls	2008	{"Ferrari, Bruno","Planes, Serge","Raventos, Nuria"}	{"No Stressor/Restoration"}
1978662	THE DUTCH WADDEN SEA - A CHANGED ECOSYSTEM	1993	{"BODDEKE, R","DEJONGE, VN","ESSINK, K"}	{"Management or Restoration"}
1978240	Biological complexity confounds the separation of point- and non-point sources of human impact on the natural world	1997	{"Kennedy, AD"}	{"Management or Restoration"}
1977435	The effects of varying levels of eutrophication on phytoplankton and seagrass (Thalassia testudinum) populations of the southeast coast of Jamaica	2003	{"Green, SO","Webber, DF"}	{"Non Zostera"}
1977630	The future of seagrass meadows	2002	{"Duarte, CM"}	{Review}
1976995	Biodiversity and the functioning of seagrass ecosystems	2006	{"Duffy, J. Emmett"}	{Review}
1976157	Accelerating loss of seagrasses across the globe threatens coastal ecosystems	2009	{"Calladine, Ainsley","Carruthers, Tim J. B.","Dennison, William C.","Duarte, Carlos M.","Fourqurean, James W.","Heck, Kenneth L., Jr.","Hughes, A. Randall","Kendrick, Gary A.","Kenworthy, W. Judson","Olyarnik, Suzanne","Orth, Robert J.","Short, Frederick T.","Waycott, Michelle","Williams, Susan L."}	{Review}
1975554	Prioritization of Ecosystem Services Research: Tampa Bay Demonstration Project	2011	{"Alvarez, Federico","Dantin, Darrin","Harvey, James","Jordan, Stephen","Nestlerode, Janet","Rogers, John","Russell, Marc"}	{"Management or Restoration",Review}
1975317	Changing Paradigms in Seagrass Restoration	2012	{"Bernard, Guillaume","Cunha, Alexandra H.","Ferreira, M. Adelaide","Garcia, Silvia","Garmendia, Joxe M.","Henriques, Miguel","Manent, Pablo","Marba, Nuria N.","Pickerell, Christopher","van Katwijk, Marieke M."}	{"Management or Restoration"}
1977988	Leaf nutrient resorption, leaf lifespan and the retention of nutrients in seagrass systems	1999	{"Hemminga, MA","Marba, N","Stapel, J"}	{"Non Zostera"}
1973588	Development of an epiphyte indicator of nutrient enrichment: A critical evaluation of observational and experimental studies	2017	{"Nelson, Walter G."}	{Review}
1977590	Getting the foundation right: A scientifically based management framework to aid in the planning and implementation of seagrass transplant efforts	2002	{"Campbell, ML"}	{"Management or Restoration"}
1978472	EELGRASS (ZOSTERA-MARINA L) TRANSPLANTS IN SAN-FRANCISCO BAY - ROLE OF LIGHT AVAILABILITY ON METABOLISM, GROWTH AND SURVIVAL	1995	{"ALBERTE, RS","REGUZZONI, JL","ZIMMERMAN, RC"}	{"Management or Restoration"}
1975054	Using allometric procedures to substantiate the plastochrone method for eelgrass leaf growth assessments	2013	{"Castillo, Oscar","Echavarria-Heras, Hector","Leal-Ramirez, Cecilia","Solana-Arellano, Elena"}	{"Management or Restoration"}
1974955	Iron, cadmium, and chromium in seagrass (Thalassia testudinum) from a coastal nature reserve in karstic Yucatan	2013	{"Avelar, Mayra","Bonilla-Heredia, Blanca","Carricart-Ganivet, Juan P.","Herrera-Silveira, Jorge A.","Martinez, Ana","Merino-Ibarra, Martin","Ramirez, Javier","Rosas, Humberto","Valdespino, Job"}	{"Management or Restoration"}
1974898	Maximising establishment success of Amphibolis antarctica seedlings	2013	{"Paling, Erik I.","Seidlitz, Anke","Verduin, Jennifer J.","van Keulen, Mike"}	{"Management or Restoration"}
1974829	Impacts of docks on seagrass and effects of management practices to ameliorate these impacts	2014	{"Courtenay, Glenn","Gladstone, William"}	{"Management or Restoration"}
1977229	Effect of transplantation on Posidonia oceanica shoots	2004	{"Bouquegneau, JM","Gobert, S","Lepoint, G","Vangeluwe, D"}	{"Management or Restoration"}
1977073	Effects of mining wastes on a seagrass ecosystem: metal accumulation and bioavailability, seagrass dynamics and associated community structure	2005	{"Atucha, AM","Fernandez, AJG","Lloret, J","Lopez, EM","Marin-Guirao, L"}	{"Management or Restoration"}
1975923	Protocols for Use of Potamogeton perfoliatus and Ruppia maritima Seeds in Large-Scale Restoration	2010	{"Ailstock, M. Stephen","Magoun, A. Dale","Shafer, Deborah J."}	{"Management or Restoration"}
1975811	Coastal Monitoring Programs	2011	{"BE Wolanski, E","Carstensen, J.","Dahl, K.","Henriksen, P.","Hjorth, M.","Josefson, A.","Krause-Jensen, D.","McLusky, D"}	{"Coastal Habitat","Management or Restoration"}
1976031	REVIEW OF THE MANICOUAGAN MARINE PROTECTED AREA (MPA) ECOLOGICAL MONITORING PLAN.	2010	NA	{"Management or Restoration"}
1975918	Large-Scale Zostera marina (eelgrass) Restoration in Chesapeake Bay, Maryland, USA. Part II: A Comparison of Restoration Methods in the Patuxent and Potomac Rivers	2010	{"Busch, Kathryn E.","Golden, Rebecca R.","Karrh, Lee P.","Lewandowski, Mark J.","Naylor, Michael D.","Parham, Thomas A."}	{"Management or Restoration"}
1977213	Marine protected areas: A tool for coastal areas management	2005	{"BE Levner, E","Boudouresque, CF","Cadiou, G","Le Direac'h, L","Linkov, I","Proth, JM"}	{"Management or Restoration"}
1977029	The mini-312 program - An expedited damage assessment and restoration process for seagrasses in the Florida Keys National Marine Sanctuary	2005	{"Barry, KA","Fonseca, MS","Julius, BE","Kenworthy, WJ","Kirsch, KD","Meehan, SR","Whitfield, PE"}	{"Management or Restoration"}
1977574	Effectiveness of protection of seagrass (Posidonia oceanica) populations in Cabrera National Park (Spain)	2002	{"Basterretxea, G","Duarte, CM","Holmer, M","Jordi, A","Marba, N","Martinez, R","Orfila, A","Tintore, J"}	{"Management or Restoration"}
1977257	Anthropogenic nutrient enrichment of seagrass and coral reef communities in the Lower Florida Keys: discrimination of local versus regional nitrogen sources	2004	{"Barile, PJ","Lapointe, BE","Matzie, WR"}	{"Management or Restoration"}
1974421	Rhizome starch as indicator for temperate seagrass winter survival	2015	{"Bouma, Tjeerd J.","Giesen, Kris","Govers, Laura L.","Hoppenreijs, Jacqueline H. T.","Suykerbuyk, Wouter","van Katwijk, Marieke M."}	{"Management or Restoration"}
1974317	An effective seed protection method for planting Zostera marina (eelgrass) seeds: Implications for their large-scale restoration	2015	{"Fang, Chao","Li, Wen-Tao","Liu, Jie","Liu, Yan-Shan","Xu, Qiang","Zhang, Pei-Dong"}	{"Management or Restoration"}
1979316	SYSTEMATICS AND ECOLOGY OF THE ISEFJORD MARINE FAUNA DENMARK WITH A SURVEY OF THE EELGRASS ZOSTERA VEGETATION AND ITS COMMUNITIES	1973	{"RASMUSSEN E"}	{Review}
1976484	Testing the Stochastic Dynamic Methodology (StDM) as a management tool in a shallow temperate estuary of south Europe (Mondego, Portugal)	2008	{"Cabral, Joao Alexandre","Lopes, Ricardo Jorge","Murias, Tiago","Pardal, Miguel Angelo","Silva-Santos, Pedro"}	{"Management or Restoration"}
1974594	Incorporating Surrogate Species and Seascape Connectivity to Improve Marine Conservation Outcomes	2014	{"Albert, Simon","Aswani, Shankar","Connolly, Rod M.","Maxwell, Paul S.","Olds, Andrew D.","Pitt, Kylie A."}	{"Management or Restoration"}
1974727	Drivers of Change in Shallow Coastal Photic Systems: An Introduction to a Special Issue	2014	{"Brush, Mark J.","Kennish, Michael J.","Moore, Kenneth A."}	{"Review or Book"}
1974665	Epifaunal invertebrates as predators of juvenile bay scallops (Argopecten irradians)	2014	{"Duffy, J. Emmett","Lefcheck, Jonathan S.","Luckenbach, Mark W.","Orth, Robert J.","Schmitt, Erika L.","van Montfrans, Jacques"}	{"Management or Restoration"}
1974590	Zoning Cambodia's first Marine Fisheries Management Area.	2014	{"Benbow, Sophie L.P.","Boon, Pei Ya","Leng, Phalla","Longhurst, Kate","Mulligan, Berry","Thorne, Benjamin V."}	{"Management or Restoration"}
1974394	Identifying habitats at risk: simple models can reveal complex ecosystem dynamics	2015	{"Connolly, Rod M.","Maxwell, Paul S.","Olds, Andrew D.","Pitt, Kylie A.","Rissik, David"}	{"Management or Restoration"}
1974674	The Value of Long-Term Assessment of Restoration: Support from a Seagrass Investigation	2014	{"Bell, Susan S.","Hall, Margaret O.","Middlebrooks, Michael L."}	{"Management or Restoration"}
1974744	Habitat collapse due to overgrazing threatens turtle conservation in marine protected areas	2014	{"Bouma, Tjeerd J.","Christianen, Marjolijn J. A.","Engelhard, Sarah L.","Herman, Peter M. J.","Kiswara, Wawan","Lamers, Leon P. M.","Mumby, Peter J.","Silliman, Brian R.","de Kerk, Madelon van","van Katwijk, Marieke M.","van de Koppel, Johan","van der Heide, Tjisse"}	{"Management or Restoration"}
1974710	Degradation of Cymodocea nodosa (Ucria) Ascherson meadow at Las Canteras Beach (Gran Canaria, Canary Islands, Atlantic Ocean)	2014	{"Polifrone, Milena","Rosell-Fieschi, Miquel"}	{"Management or Restoration"}
1974651	Natural values, coastal and marine ecosystems of the Circeo National Park: conservation priorities	2014	{"Raimondi, Stefano"}	{"Management or Restoration"}
1979344	A study of the heat tolerance of the cells of certain marine grasses	1962	{"FEL'DMAN, N. L.","LYUTOVA, M. I."}	{"Not accessible"}
1978985	ENVIRONMENTAL CONTROL OF SEAGRASS GROWTH	1987	{"DENNISON W C"}	{"Review or Book"}
1977965	Seagrass bed recovery after hydrological restoration in a coastal lagoon with groundwater discharges in the north of Yucatan (Southeastern Mexico)	2000	{"BE Bortone, SA","Gomez, N","Herrera-Silveira, JA","Ramirez-Ramirez, J","Zaldivar-Jimenez, A"}	{"Management or Restoration"}
1978848	EFFECTS OF THE NUMBER OF SHORT SHOOTS AND PRESENCE OF THE RHIZOME APICAL MERISTEM ON THE SURVIVAL AND GROWTH OF TRANSPLANTED SEAGRASS THALASSIA-TESTUDINUM	1991	{"DAWES C J","HALL M O","TOMASKO D A"}	{"Non Zostera"}
1972477	Posidonia oceanica lower depth limits along a latitudinal gradient in the eastern Adriatic Sea	2020	{"Cizmek, Hrvoje","Mokos, Melita","Zubak, Ivana"}	{"Non Zostera"}
1978652	VEGETATIVE REPRODUCTION IN POSIDONIA-OCEANICA - SURVIVAL AND DEVELOPMENT IN DIFFERENT MORPHOLOGICAL TYPES OF TRANSPLANTED CUTTINGS	1993	{"CAYE, G","MEINESZ, A","MOLENAAR, H"}	{"Management or Restoration"}
1974508	Biomares, a LIFE project to restore and manage the biodiversity of Prof. Luiz Saldanha Marine Park	2014	{"Borges, Rita","Cunha, Alexandra H.","Duarte, Carlos","Erzini, Karim","Fonseca, Mark","Goncalves, Emanuel","Guerra, Miriam","Henriques, Miguel","Henriques, Victor","Marba, Nuria","Serrao, Ester A."}	{"Management or Restoration"}
1973482	Ecosystem functions and economic wealth: Trajectories of change in seagrass meadows	2017	{"Bianchi, Carlo Nike","Burgos, Elena","Ferrari, Marco","Montefalcone, Monica","Morri, Carla","Paoli, Chiara","Vassallo, Paolo"}	{"Management or Restoration"}
1973397	Habitat Connectivity of Fish in Temperate Shallow-Water Seascapes	2018	{"Gullstrom, Martin","Perry, Diana","Staveley, Thomas A. B."}	{"Management or Restoration"}
1973312	Marine protected areas, Satoumi, and territorial use rights for fisheries: A case study from hinase, Japan	2018	{"Hori, Juri","Hori, Masakazu","Kunieda, Toshihiro","Makino, Mitsutaku","Tsurita, Izumi"}	{"Management or Restoration"}
1975208	Assessing the relative risk of land based pollutants to the Great Barrier Reef	2013	{"Anderssen, RS","BE Piantadosi, J","Boland, J","Brodie, Jon","Maynard, Jeffrey","Waterhouse, Jane"}	{"Management or Restoration"}
1976204	Legal protection is not enough: Posidonia oceanica meadows in marine protected areas are not healthier than those in unprotected areas of the northwest Mediterranean Sea	2009	{"Albertelli, Giancarlo","Bianchi, Carlo Nike","Montefalcone, Monica","Morri, Carla","Parravicini, Valeriano"}	{"Management or Restoration"}
1976107	Evaluation of the viability of Posidonia oceanica transplants associated with a marina expansion	2009	{"Fernandez-Torquemada, Yolanda","Gonzalez-Correa, Jose M.","Sanchez-Lizaso, Jose L."}	{"Management or Restoration"}
1975924	Effects of Planting Depth, Sediment Grain Size, and Nutrients on Ruppia maritima and Potamogeton perfoliatus Seedling Emergence and Growth	2010	{"Ailstock, M. Stephen","Magoun, A. Dale","Shafer, Deborah J."}	{"Management or Restoration"}
1975916	An Introduction to a Special Issue on Large-Scale Submerged Aquatic Vegetation Restoration Research in the Chesapeake Bay: 2003-2008	2010	{"Bergstrom, Peter","Shafer, Deborah"}	{"Management or Restoration"}
1972649	The use of remote sensing for monitoring Posidonia oceanica and Marine Protected Areas: A systemic review	2020	{"Appolloni, Luca","Buonocore, Elvira","Franzese, Pier Paolo","Russo, Giovanni Fulvio"}	{"Management or Restoration","Review or Book"}
1976616	Ecosystem-based management of Florida Bay and its Everglades Watershed	2007	{"Madden, Christopher J."}	{"Management or Restoration"}
1977126	Growth method of kelps such as zostera in sea, involves subjecting seeds of zostera planted in artificial soil to temperature stimulation, and throwing artificial soil into sea bottom after growth of leaf and root of zostera	NA	{"NAGASAKA M"}	{"Ghost citation"}
1978945	STUDY ON THE TECHNIQUE FOR ZOSTERA BED CREATION	1988	{"GOTO H","KAWASAKI Y","KIKUTI K","LITUKA T","TERAWAKI T","WATANABE Y"}	{"Not accessible","Technical Report"}
1974941	Method for seagrass habitat restoration, involves fixing seagrass coenosis in container formed with multiple through-holes, and moving coenosis to seafloor, where container is prepared with biodegradation property material and ceramic	NA	{"KYU H H","PARK J R","SON M H"}	{"Ghost citation"}
1972910	Method for cultivating eelgrass, involves screening grass granules, soaking seeds in water, and germinating under UV light, uniformly seeding treated seed on medium, adding culture solution, culturing and screening	NA	{"W, HE"}	{"Ghost citation"}
1972521	Performing antibacterial preservation of Zostera marina seeds, involves immersing Zostera marina seeds in mixed solution of nano silver and copper sulfate prepared with seawater, sealing and storing seeds	NA	{"H, YANG","R, GU","S, XU","S, YUE","X, ZHANG","Y, ZHANG","Y, ZHOU"}	{"Ghost citation"}
1973732	Sustainable management of Australia's coastal seascapes: a case for collecting and communicating quantitative evidence to inform decision-making	2017	{"Creighton, Colin","Gillies, Chris L.","Hedge, Paul T.","McLeod, Ian M.","Sheaves, Marcus","Wegscheidl, Carla J."}	{"Management or Restoration"}
1973652	Application of solidified sea bottom sediments into environmental bioremediation materials	2017	{"Dabwan, Ahmed H. A.","Funasaka, Kunihiro","Imai, Daizo","Kaneco, Satoshi","Katsumata, Hideyuki","Suzuki, Tohru"}	{"Management or Restoration"}
1973532	Natural capital accounting in marine protected areas: The case of the Islands of Ventotene and S. Stefano (Central Italy)	2017	{"Buonocore, Elvira","Donnarumma, Luigia","Franzese, Pier Paolo","Russo, Giovanni F."}	{"Management or Restoration"}
1976182	How effective are MPAs? Predation control and 'spill-in effects' in seagrass-coral reef lagoons under contrasting fishery management	2009	{"Eklof, Johan S.","Frocklin, Sara","Kimathi, Alex","Lindvall, Annika","McClanahan, Tim R.","Stadlinger, Nadja","Uku, Jacqueline N."}	{"Management or Restoration"}
1972673	Evaluating the coastal ecosystem status of two Western and Eastern Mediterranean islands using the seagrass Posidonia oceanica	2020	{"Aktan, Y.","Guresen, A.","Guresen, S. O.","Pergent, G."}	{"Management or Restoration"}
1972565	Assessing natural capital value in marine ecosystems through an environmental accounting model: A case study in Southern Italy	2020	{"Appolloni, Luca","Buonocore, Elvira","Franzese, Pier Paolo","Russo, Giovanni F."}	{"Management or Restoration"}
1973178	Effects of temperature and salinity on Ruppia sinensis seed germination, seedling establishment, and seedling growth	2018	{"Gu, Ruiting","Lin, Haiying","Song, Xiaoyue","Xu, Shaochun","Xu, Shuai","Zhang, Xiaomei","Zhou, Yi","Zhu, Shuyu"}	{"Management or Restoration"}
1973522	Biomonitoring of coastal pollution in the Gulf of Gabes (SE, Tunisia): use of Posidonia oceanica seagrass as a bioindicator and its mat as an archive of coastal metallic contamination	2017	{"Attia, Faouzi","Balti, Rafik","Bejaoui, Nejla","Castet, Sylvie","Courjault-Rade, Pierre","Daghbouj, Nabil","El Zrelli, Radhouan","Mansour, Lamjed","Michel, Sylvain","Rabaoui, Lotfi"}	{"Management or Restoration"}
1975131	Effects of cryopreservation by vitrification on the viability of eelgrass Zostera marina seeds.	2013	{"Sun Yan","Tian Lu","Zhang Ling-yu","Zhang Pei-dong","Zhang Xiu-mei"}	{"Management or Restoration"}
1973071	Habitat and seascape patterns drive spatial variability in temperate fish assemblages: implications for marine protected areas	2018	{"Davis, Andrew R.","Knott, Nathan A.","Rees, Matthew J."}	{"Management or Restoration"}
1975857	Testing alternate ecological approaches to seagrass rehabilitation: links to life-history traits	2010	{"Collings, Greg J.","Hoare, Sonja L.","Irving, Andrew D.","Miller, David","Seddon, Stephanie","Tanner, Jason E.","Theil, Mandee J.","Wear, Rachel J."}	{"Management or Restoration"}
1975564	Modelling seagrass growth and development to evaluate transplanting strategies for restoration	2011	{"Airey, Michael","Cambridge, Marion L.","Kendrick, Gary A.","Renton, Michael"}	{"Management or Restoration"}
1972744	Development and implementation of an empirical habitat change model and decision support tool for estuarine ecosystems	2019	{"Davis, Melanie J.","De La Cruz, Susan E. W.","Woo, Isa"}	{"Management or Restoration"}
1972960	Ecosystem-based management planning across aquatic realms at the Ria de Aveiro Natura 2000 territory	2019	{"Delacamara, Gonzalo","Lillebo, Ana, I","Marhubi, Asya","Martinez-Lopez, Javier","Morgado, Mariana","Nogueira, Antonio J. A.","Strosser, Pierre","Teixeira, Heliana"}	{"Management or Restoration"}
1973834	Sea-grass communities: structure, distribution and classification	2016	{"den Hartog, Cornelis"}	{"No Stressor/Restoration","Review or Book"}
1972466	Nutrient loading diminishes the dissolved organic carbon drawdown capacity of seagrass ecosystems.	2020	{"Deng, Yiqin","Huang, Xiaoping","Jiang, Zhijian","Liu, Songlin","Macreadie, Peter I.","Wu, Yunchao"}	{"Non Zostera"}
1973862	Impacts of climate change on submerged and emergent wetland plants	2016	{"Kosten, Sarian","Malone, Sparkle","Moore, Gregg E.","Morgan, Pamela A.","Short, Frederick T."}	{"Review or Book"}
1973059	A novel approach to determining dynamic nitrogen thresholds for seagrass conservation	2019	{"Daly, Rob","Erftemeijer, Paul L. A.","Fernandes, Milena B.","Gonzalez, Dennis","Rouse, Karen","van Gils, Jos"}	{"Non Zostera","Management or Restoration"}
1975612	Influence of suspended and off-bottom mussel culture on the sea bottom and benthic habitats: a review	2011	{"Archambault, Philippe","Callier, Myriam D.","McKindsey, Christopher W.","Olivier, Frederic"}	{"Review or Book"}
1978203	Biodiversity of marine plants in an era of climate change: Some predictions based on physiological performance	1998	{"Beardall, J","Beer, S","Raven, JA"}	{"Review or Book"}
1978149	The root/rhizome system of seagrasses: an asset and a burden	1998	{"Hemminga, MA"}	{"Review or Book"}
1973869	Extreme N-15 Depletion in Seagrasses	2016	{"Abdel-Moati, M.","Al-Ansari, E. S.","Al-Maslamani, I.","Al-Shaikh, I.","Al-Yafei, M. A. A.","Castillo, A.","Haddaway, N.","Kennedy, H.","Le Vay, L.","Walton, M. E. M."}	{"Non Zostera"}
1976617	Understanding the effects of seasonal macroalgal blooms on the seagrass community: Implications for habitat structure and fish foraging	2007	{"Olyarnik, Suzanne V.","Stachowicz, John J."}	{Conference}
1975593	Habitat-Mediated Facilitation and Counteracting Ecosystem Engineering Interactively Influence Ecosystem Responses to Disturbance	2011	{"Donadi, Serena","Eklof, Johan S.","Eriksson, Britas Klemens","O'Hara, Robert","van der Heide, Tjisse","van der Zee, Els M."}	{"Management or Restoration"}
1976272	THE LAGOON OF ORBETELLO	2009	{"BE Cecere, E","Birardi, Francesca","Boddi, Silvia","Izzo, G","Lenzi, Mauro","Petrocelli, A","Roffilli, Rugiada","Sartoni, Gianfranco","Sfriso, A","Solari, Duccio"}	{"Review or Book"}
1973471	The Seagrass Holobiont and Its Microbiome	2017	{"Chakrabarti, Seemanti","Laas, Peeter","Stingl, Ulrich","Ugarelli, Kelly"}	{"Management or Restoration"}
1972981	Improved allometric proxies for eelgrass conservation	2019	{"Echavarria-Heras, H.","Leal-Ramirez, C.","Montesinos-Lopez, A.","Villa-Diharce, E."}	{"Management or Restoration"}
1973168	Seagrass ecosystem trajectory depends on the relative timescales of resistance, recovery and disturbance	2018	{"Adams, Matthew P.","Christianen, Marjolijn J. A.","Collier, Catherine","Dennison, William C.","Ferguson, Angus J. P.","Kendrick, Gary A.","Kilminster, Kieryn","Lyons, Mitchell","Maxwell, Paul","McKenzie, Len J.","McMahon, Kathryn","Mumby, Peter J.","O'Brien, Katherine R.","Radke, Lynda","Samper-Villarreal, Jimena","Scanes, Peter","Udy, James W.","Waycott, Michelle"}	{"Management or Restoration","Review or Book"}
1973099	Mapping seston depletion over an intertidal eastern oyster (Crassostrea virginica) reef: Implications for restoration of multiple habitats	2018	{"Coen, Loren D.","Grizzle, Raymond E.","Martignette, A. J.","Rasmussen, Anna","Ward, Krystin"}	{"Non Zostera","Management or Restoration"}
1972612	Impacts of land management practices on blue carbon stocks and greenhouse gas fluxes in coastal ecosystems-A meta-analysis	2020	{"Fest, Benedikt J.","O'Connor, J. Jack","Sievers, Michael","Swearer, Stephen E."}	{"Management or Restoration","Review or Book"}
1973323	Value of ecosystem-based management	2018	{"Leslie, Heather M."}	{"Management or Restoration","Review or Book"}
1974628	Quantifying and modelling the carbon sequestration capacity of seagrass meadows - A critical assessment	2014	{"Baird, M. E.","Larkum, A. W. D.","Macreadie, P. I.","Ralph, P. J.","Trevathan-Tackett, S. M."}	{"No Stressor/Restoration","Review or Book"}
1973491	The relationship between habitat complexity and nursery provision for an estuarine-dependent fish species in a permanently open South African Estuary	2017	{"James, Nicola C.","Leslie, Timothy","Potts, Warren M.","Rajkaran, Ariusha"}	{"Management or Restoration"}
1973663	Role of habitat and predators in maintaining functional diversity of estuarine bivalves	2017	{"Glaspie, Cassandra N.","Seitz, Rochelle D."}	{"No Stressor/Restoration"}
1973226	Metagenomic Evidence of Microbial Community Responsiveness to Phosphorus and Salinity Gradients in Seagrass Sediments	2018	{"Fraser, Matthew W.","Gleeson, Deirdre B.","Grierson, Pauline F.","Kendrick, Gary A.","Laverock, Bonnie"}	{"Non Zostera"}
1972970	Spatial planning for shellfish aquaculture and seagrasses in US West Coast estuaries: considerations for adapting to an uncertain climate	2019	{"Dumbauld, Brett R.","Ruesink, Jennifer L.","Waldbusser, George G."}	{"Management or Restoration","Review or Book"}
1972486	Chesapeake Bay acidification buffered by spatially decoupled carbonate mineral cycling	2020	{"Brodeur, Jean","Cai, Wei-Jun","Chen, Baoshan","Cornwell, Jeffrey","Dai, Minhan","Gurbisz, Cassie","Hussain, Najid","Kemp, W. Michael","Li, Ming","Ni, Chaoying","Ni, Wenfei","Owens, Michael S.","Scaboo, K. Michael","Su, Jianzhong","Testa, Jeremy M.","Waldbusser, George G.","Xie, Xiaohui","Xu, Yuan-yuan","Yao, Yichen"}	{"Non Zostera","Management or Restoration"}
